# Supplementary material for: Unravelling Mn4Ca cluster vibrations in the S1, S2 and S3 states of the Kok–Joliot cycle of photosystem II
Source: Royal Society of Chemistry journal article supplement (doi:10.1039/d4cp01307g), 2024-01-01
Supplement: d4cp01307g1.pdf [file d4cp01307g1.pdf]

# SUPPLEMENTARY INFORMATION

## Unravelling Mn<sub>4</sub>Ca Cluster Vibrations in the S<sub>1</sub>, S<sub>2</sub> and S<sub>3</sub> states of the Kok-Joliot cycle of Photosystem II

MATTEO CAPONE<sup>a,b,\*</sup> GIANLUCA PARISSÉ<sup>a</sup> DANIELE NARZI<sup>a</sup> LEONARDO GUIDONI<sup>a,\*</sup>

July 1, 2024

### Contents

|   |                           |   |
|---|---------------------------|---|
| 1 | Convergence of IR Spectra | 2 |
|---|---------------------------|---|

### List of Figures

|    |                                                                                                                                                                                     |   |
|----|-------------------------------------------------------------------------------------------------------------------------------------------------------------------------------------|---|
| S1 | Convergence of the S <sub>1</sub> infrared spectra with increasing simulation time. . . . .                                                                                         | 3 |
| S2 | Convergence of Mn <sub>4</sub> CaO <sub>5</sub> portion in the S <sub>1</sub> state with increasing simulation time. . . . .                                                        | 3 |
| S3 | Convergence of Diamond1 (Mn1-O1-Mn2-O2) portion in the S <sub>1</sub> state with increasing simulation time. . . . .                                                                | 4 |
| S4 | Convergence of Mn1-O1 portion in the S <sub>1</sub> state with increasing simulation time. . . . .                                                                                  | 4 |
| S5 | Convergence of S <sub>2</sub> -minus-S <sub>1</sub> differential IR-spectra in the low frequency region. . . . .                                                                    | 5 |
| S6 | Distribution of the Mn-Mn distances in S <sub>1</sub> (top), S <sub>2</sub> (middle), and S <sub>3</sub> (bottom) states sampled along the respective QM/MM MD simulations. . . . . | 6 |
| S7 | Distribution of the Mn-O distances in S <sub>1</sub> (top), S <sub>2</sub> (middle), and S <sub>3</sub> (bottom) states sampled along the respective QM/MM MD simulations. . . . .  | 7 |

<sup>0a</sup> Università degli studi dell'Aquila, Dipartimento di Scienze Fisiche e Chimiche, L'Aquila, Italy

<sup>0b</sup> Current affiliation: Center S3, CNR Institute of Nanoscience, Modena, Italy

<sup>0\*</sup> To whom the correspondence should be addressed. email: matteo.capone@nano.cnr.it, leonardo.guidoni@univaq.it

# 1 Convergence of IR Spectra

In order to assess the reliability of the reported data, we present here an evaluation of the theoretical spectra over the simulation timescale. We conducted this evaluation on the total IR spectrum for one of the reported metastable states of the cycle, i.e., the  $S_1$  state, and on the  $S_2$ -minus- $S_1$  differential IR spectrum. For robust band assignment, it is mandatory to sample each vibrational mode a sufficient number of times. As an example, the C=O bonds in the ligands of the cluster, which are characterized by a high frequency of vibration, oscillate  $\sim 50$  times in 1 ps. In contrast, sampling the same number of vibrations for modes vibrating at low frequencies, such as Mn-O bonds, requires  $\sim 5$  ps. Thus, the convergence of the spectra is not reached at the same time for all frequency windows. Particularly, the low-frequency region will be the last to converge. We therefore conducted the theoretical spectrum calculation, as reported in the methods section, on increasing timescales of the system dipole sampled over the MD-QMMM simulation. To include all vibrations from the cluster and its ligands, we selected a 5 ps step increase to analyze the convergence in the range from 0 up to  $1800\text{ cm}^{-1}$ . As shown in Fig.S1, after 15 ps of simulation, the shape of the spectra is globally conserved (cyan line), and after 20 ps (orange line), only minor deviations are observed. Additionally, we report the convergence for three specific sub-systems:  $\text{Mn}_4\text{CaO}_5$  cluster, Diamond1 (Mn1-O1-Mn2-O2) and Mn1-O1. In the partitioning of the Mn cluster core we can observe with increased detail that after 20 ps the DCFT has also converged in the band positioning and relative intensities. Thus, all the assignments of each mode done in the discussion section can be considered as reliable and robust. Eventually, we report the same convergence analysis, but carried out on the differential spectrum of  $S_2$ -minus- $S_1$  (Fig.S5). Here, we can still observe some changes in the differential spectrum between the 25 and 30 ps trajectory trunk, but as with the total spectrum, after 20 ps (orange line), all the band positions are fixed, and only the relative intensity is slightly affected. In balancing the computational cost and analysis effectiveness, we considered the results converged after 30 ps of sampling for all the states.

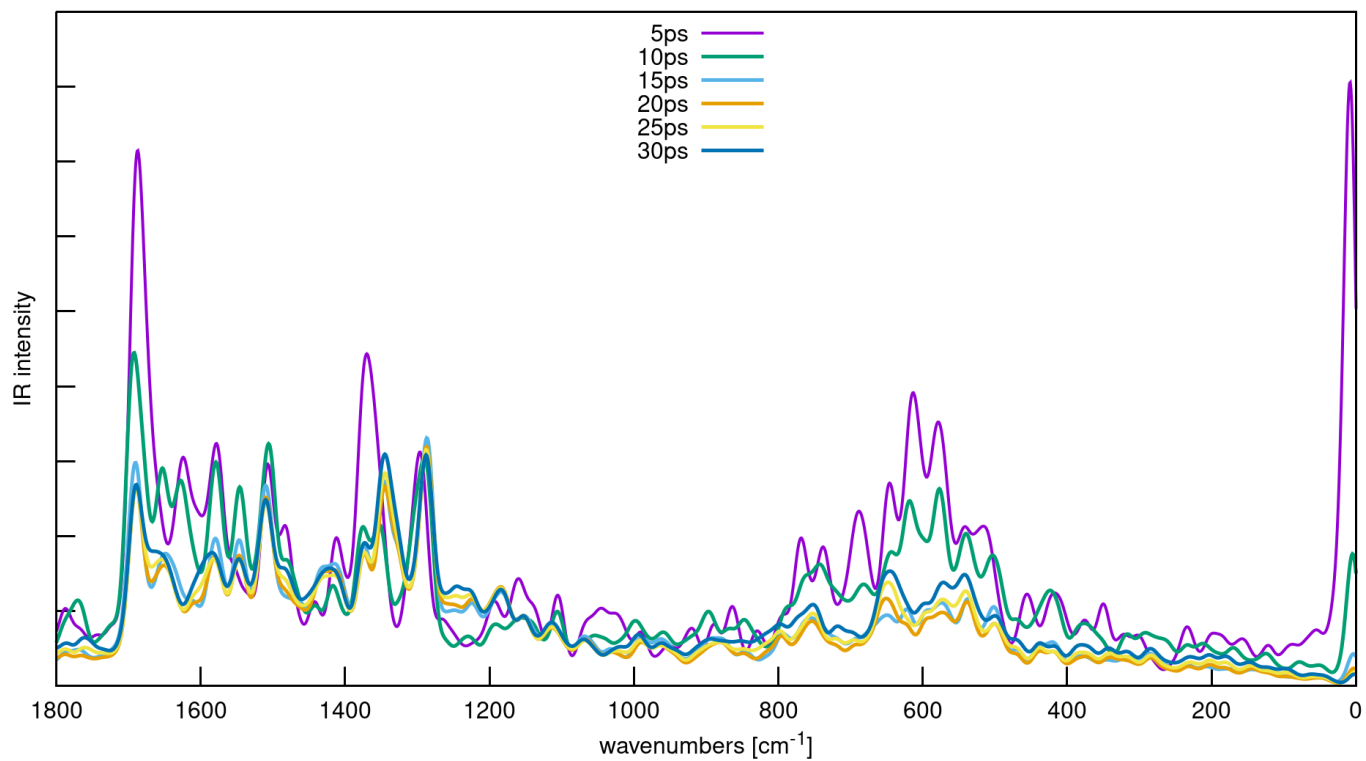

Fig. S1 Convergence of the  $S_1$  infrared spectra with increasing simulation time.

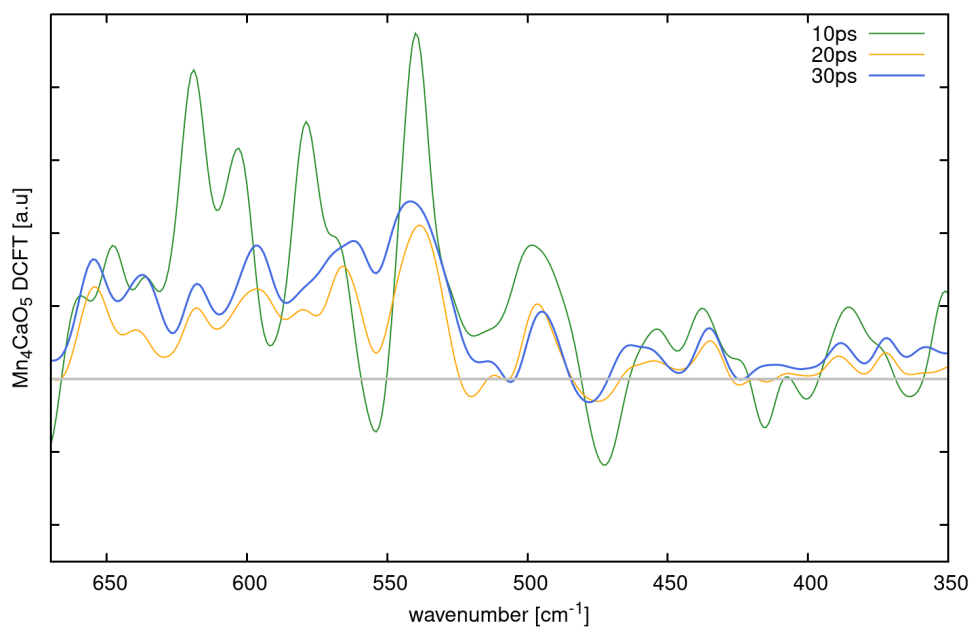

Fig. S2 Convergence of  $Mn_4CaO_5$  portion in the  $S_1$  state with increasing simulation time.

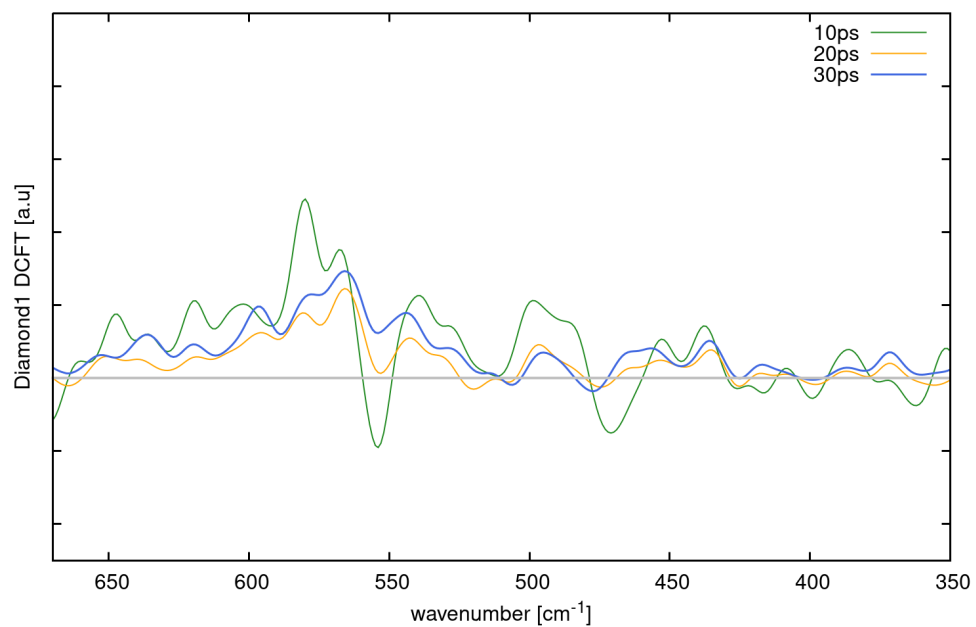

Fig. S3 Convergence of Diamond1 (Mn1-O1-Mn2-O2) portion in the  $S_1$  state with increasing simulation time.

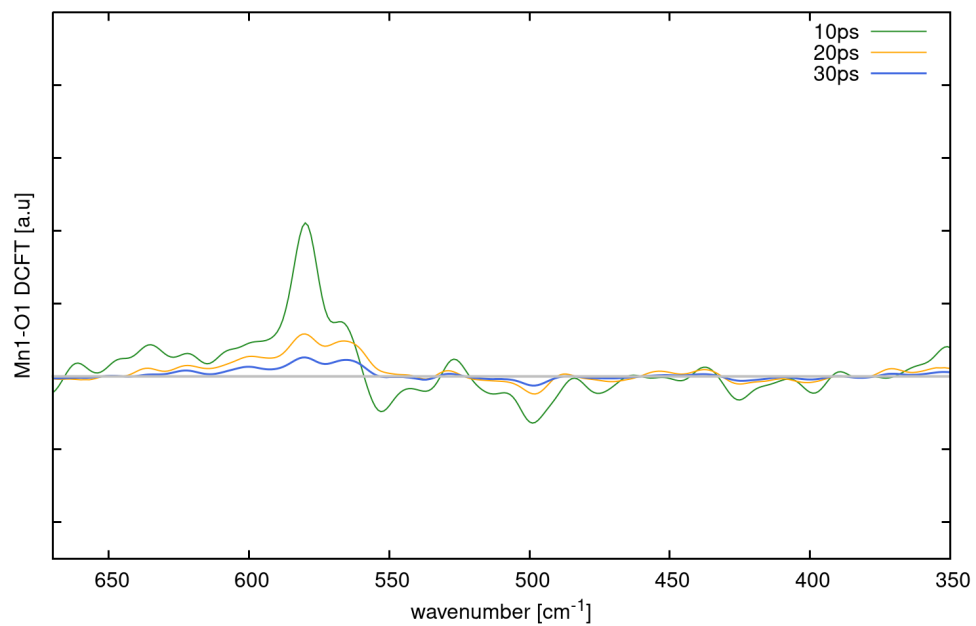

Fig. S4 Convergence of Mn1-O1 portion in the  $S_1$  state with increasing simulation time.

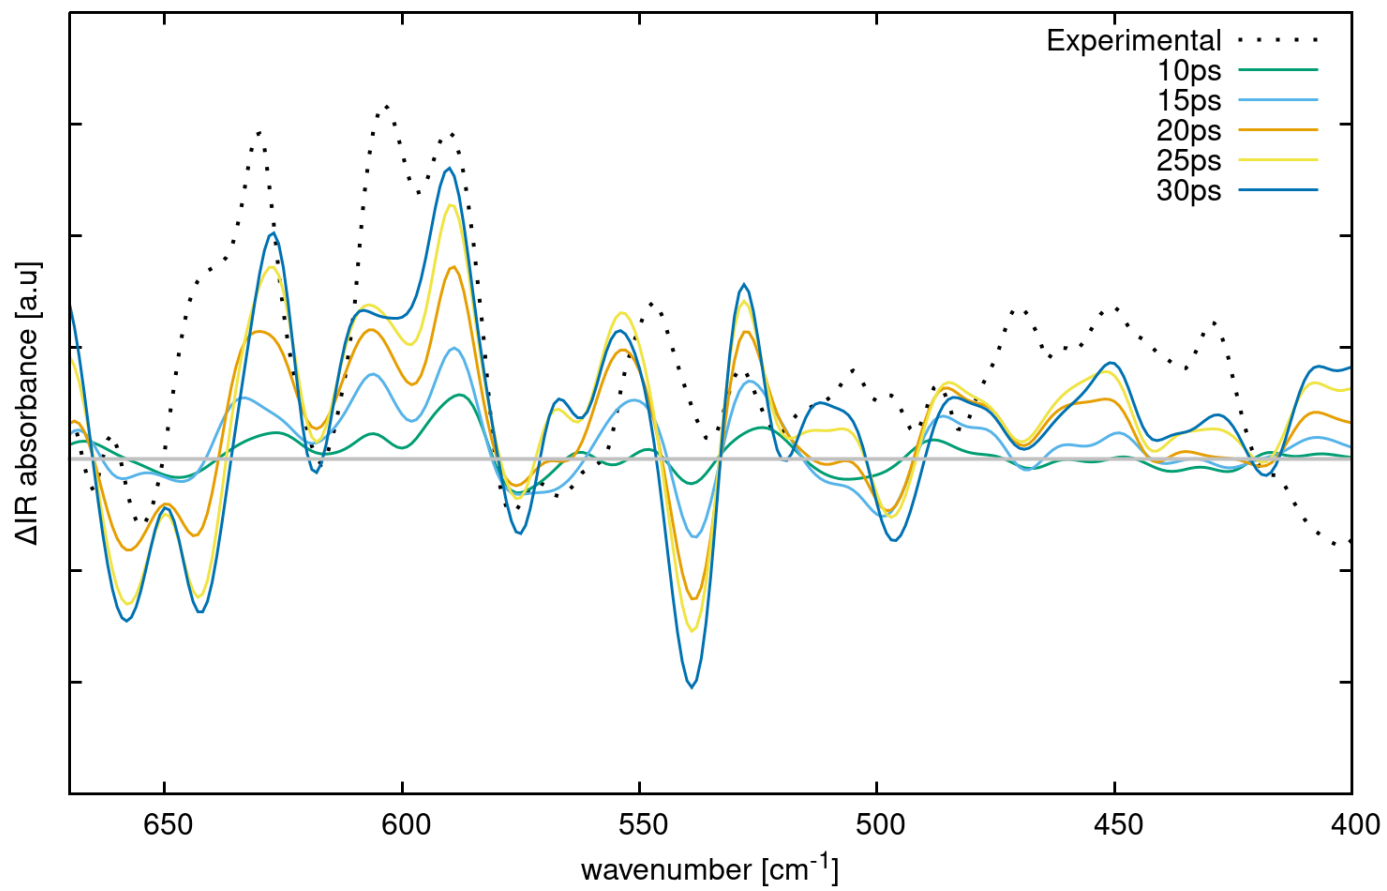

Fig. S5 Convergence of  $S_2$ -minus- $S_1$  differential IR-spectra in the low frequency region.

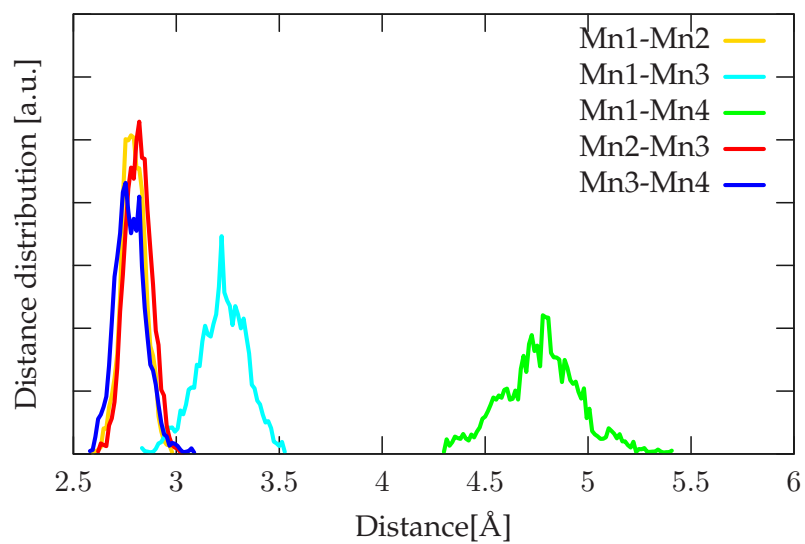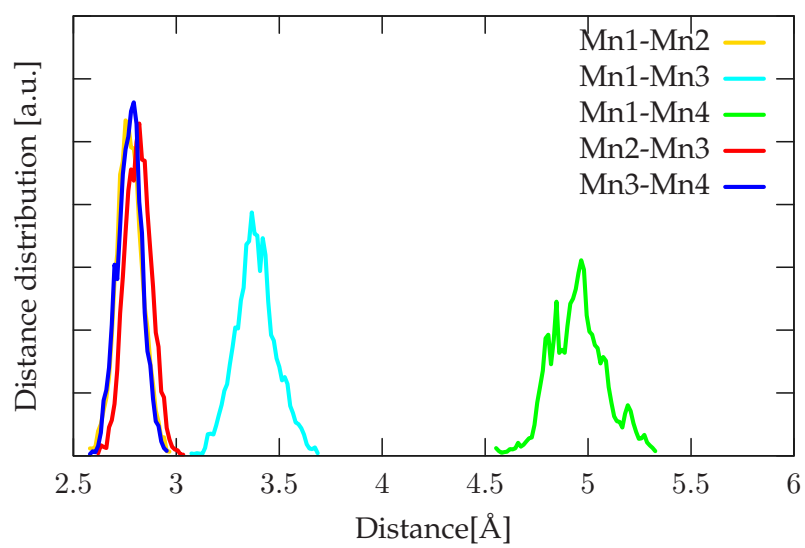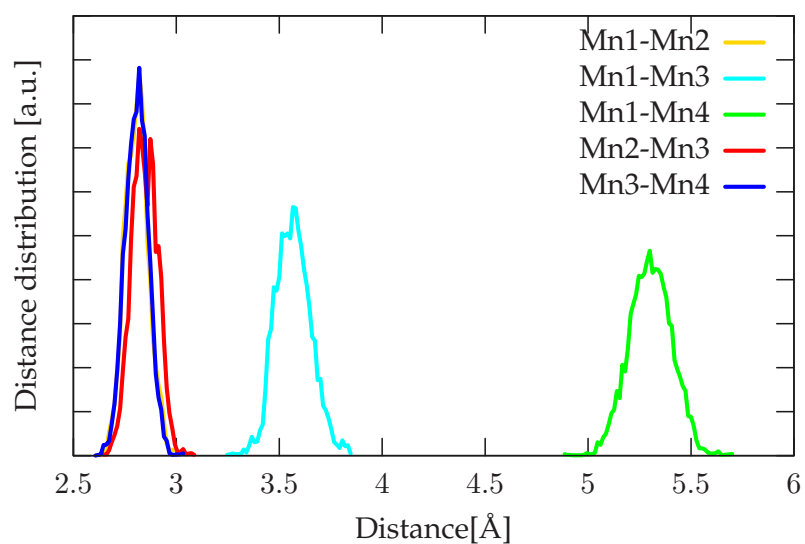

**Fig. S6** Distribution of the Mn-Mn distances in S<sub>1</sub> (top), S<sub>2</sub> (middle), and S<sub>3</sub> (bottom) states sampled along the respective QM/MM MD simulations.

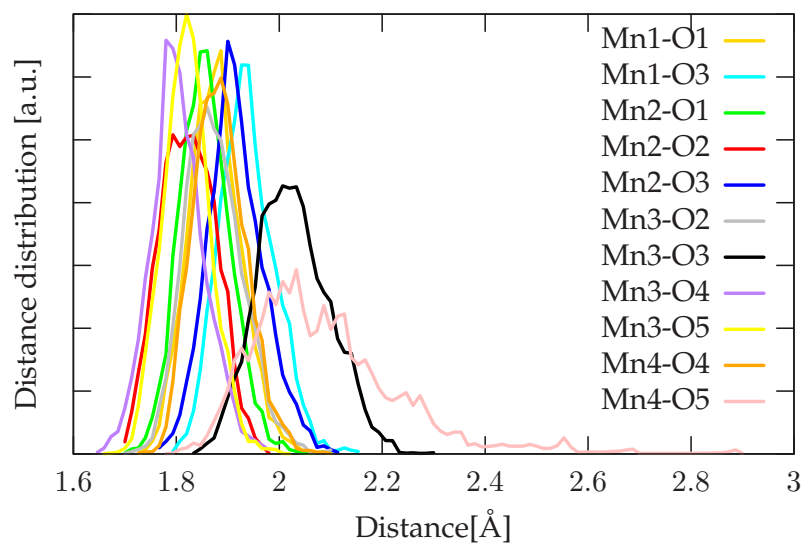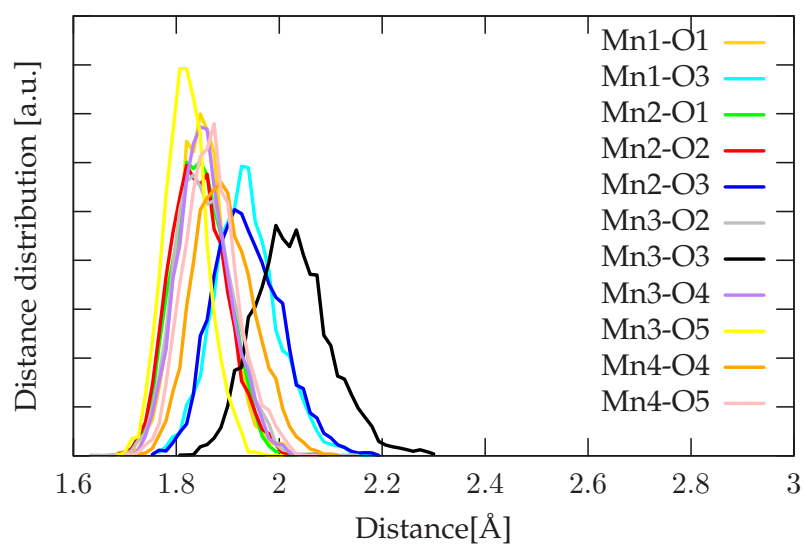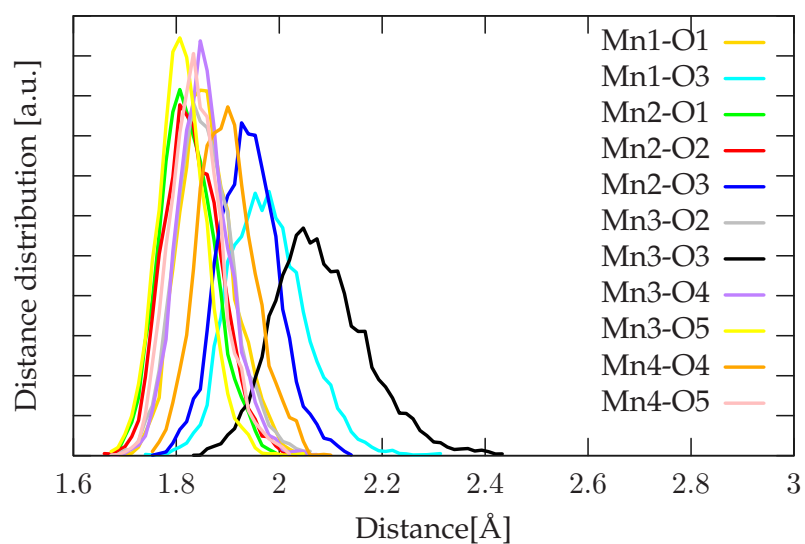

**Fig. S7** Distribution of the Mn-O distances in  $S_1$  (top),  $S_2$  (middle), and  $S_3$  (bottom) states sampled along the respective QM/MM MD simulations.
