# Supplementary material for: Unravelling Mn4Ca cluster vibrations in the S1, S2 and S3 states of the Kok–Joliot cycle of photosystem II
Source: Royal Society of Chemistry journal article supplement (doi:10.1039/d4cp01307g), 2024-01-01
Supplement: d4cp01307g2.csv [file d4cp01307g2.csv]

#wavenumber	Full-system	Mn4CaO5	Diamond1	Diamnond2	Diamond3	Diamond4	Diamond5	Mn1-O1	Mn1-O2	Mn2-O1	Mn2-O2	Mn2-O3	Mn3-O2	Mn3-O3	Mn3-O3	Mn3-O4	Mn4-O4	Mn4-O5
0.000000e+00	1.295300e+03	-4.752789e+03	-2.188170e+03	-2.782336e+03	-2.316733e+03	-1.319061e+03	-1.484883e+03	-6.704277e+02	-6.472273e+02	-1.034990e+03	-1.038573e+03	-1.011791e+03	-1.288494e+03	-1.261714e+03	-1.174566e+03	-1.417226e+03	-7.436632e+02	-7.399869e+02
1.000000e+00	1.395284e+03	-4.828526e+03	-2.223092e+03	-2.992774e+03	-2.491735e+03	-1.418924e+03	-1.597133e+03	-7.592273e+02	-7.330196e+02	-1.172136e+03	-1.176106e+03	-1.145929e+03	-1.459148e+03	-1.428974e+03	-1.330155e+03	-1.524254e+03	-8.421780e+02	-8.380052e+02
2.000000e+00	1.420367e+03	-4.639475e+03	-2.136124e+03	-3.040642e+03	-2.531277e+03	-1.441721e+03	-1.622558e+03	-8.125914e+02	-7.846234e+02	-1.254617e+03	-1.258749e+03	-1.226650e+03	-1.561735e+03	-1.529639e+03	-1.423692e+03	-1.548403e+03	-9.014129e+02	-8.969498e+02
3.000000e+00	1.368577e+03	-4.223612e+03	-1.944758e+03	-2.921881e+03	-2.431995e+03	-1.385504e+03	-1.558972e+03	-8.231799e+02	-7.949462e+02	-1.271091e+03	-1.275135e+03	-1.242859e+03	-1.582148e+03	-1.549875e+03	-1.442315e+03	-1.487614e+03	-9.132222e+02	-9.087220e+02
4.000000e+00	1.250895e+03	-3.651890e+03	-1.681671e+03	-2.660396e+03	-2.213819e+03	-1.261581e+03	-1.419123e+03	-7.908386e+02	-7.638286e+02	-1.221291e+03	-1.225018e+03	-1.194282e+03	-1.520068e+03	-1.489335e+03	-1.385733e+03	-1.354083e+03	-8.774156e+02	-8.731380e+02
5.000000e+00	1.087948e+03	-3.009076e+03	-1.385899e+03	-2.300835e+03	-1.913961e+03	-1.091095e+03	-1.226846e+03	-7.224124e+02	-6.978661e+02	-1.115739e+03	-1.118984e+03	-1.091194e+03	-1.388607e+03	-1.360819e+03	-1.265897e+03	-1.170581e+03	-8.015519e+02	-7.977254e+02
6.000000e+00	9.044386e+02	-2.373904e+03	-1.093693e+03	-1.896527e+03	-1.576869e+03	-8.993148e+02	-1.010627e+03	-6.296691e+02	-6.084052e+02	-9.725570e+02	-9.752397e+02	-9.512938e+02	-1.210332e+03	-1.186388e+03	-1.103378e+03	-9.643117e+02	-6.986426e+02	-6.954416e+02
7.000000e+00	7.233433e+02	-1.804716e+03	-8.319009e+02	-1.497005e+03	-1.243821e+03	-7.097185e+02	-7.969432e+02	-5.261652e+02	-5.085202e+02	-8.126385e+02	-8.147576e+02	-7.949942e+02	-1.011258e+03	-9.914961e+02	-9.218811e+02	-7.605453e+02	-5.836881e+02	-5.812282e+02
8.000000e+00	5.616888e+02	-1.333610e+03	-6.152669e+02	-1.138966e+03	-9.454056e+02	-5.397088e+02	-6.054324e+02	-4.241756e+02	-4.100519e+02	-6.549266e+02	-6.565360e+02	-6.408034e+02	-8.149638e+02	-7.992321e+02	-7.428891e+02	-5.780148e+02	-4.702868e+02	-4.686335e+02
9.000000e+00	4.288004e+02	-9.685106e+02	-4.473922e+02	-8.426009e+02	-6.984624e+02	-3.988696e+02	-4.469226e+02	-3.325967e+02	-3.215850e+02	-5.131790e+02	-5.143565e+02	-5.021676e+02	-6.385695e+02	-6.263812e+02	-5.819965e+02	-4.270352e+02	-3.683178e+02	-3.675000e+02
1.000000e+01	3.268836e+02	-7.001615e+02	-3.239598e+02	-6.128948e+02	-5.071698e+02	-2.895827e+02	-3.241143e+02	-2.562000e+02	-2.477298e+02	-3.948132e+02	-3.956339e+02	-3.863433e+02	-4.913005e+02	-4.820102e+02	-4.476077e+02	-3.101597e+02	-2.831178e+02	-2.831345e+02
1.100000e+01	2.530841e+02	-5.104412e+02	-2.365762e+02	-4.440205e+02	-3.667027e+02	-2.091095e+02	-2.339123e+02	-1.960723e+02	-1.895470e+02	-3.015728e+02	-3.020942e+02	-2.950477e+02	-3.753185e+02	-3.682722e+02	-3.416992e+02	-2.244078e+02	-2.159638e+02	-2.167818e+02
1.200000e+01	2.019850e+02	-3.793164e+02	-1.759826e+02	-3.245676e+02	-2.675839e+02	-1.520700e+02	-1.702078e+02	-1.507421e+02	-1.456323e+02	-2.312517e+02	-2.315120e+02	-2.261421e+02	-2.878712e+02	-2.825014e+02	-2.617789e+02	-1.639213e+02	-1.653119e+02	-1.668571e+02
1.300000e+01	1.677287e+02	-2.891958e+02	-1.340611e+02	-2.419113e+02	-1.993170e+02	-1.125137e+02	-1.262111e+02	-1.174518e+02	-1.133409e+02	-1.796439e+02	-1.796692e+02	-1.755331e+02	-2.237226e+02	-2.195866e+02	-2.030947e+02	-1.221889e+02	-1.281930e+02	-1.303427e+02
1.400000e+01	1.453667e+02	-2.267239e+02	-1.046560e+02	-1.849500e+02	-1.526642e+02	-8.521565e+01	-9.592525e+01	-9.319059e+01	-8.977910e+01	-1.421311e+02	-1.419440e+02	-1.387196e+02	-1.771281e+02	-1.739038e+02	-1.604275e+02	-9.344961e+01	-1.013437e+02	-1.039267e+02
1.500000e+01	1.314040e+02	-1.827516e+02	-8.355080e+01	-1.452353e+02	-1.205890e+02	-6.620766e+01	-7.477332e+01	-7.532805e+01	-7.241430e+01	-1.146598e+02	-1.142871e+02	-1.117461e+02	-1.430489e+02	-1.405080e+02	-1.291921e+02	-7.328990e+01	-8.189592e+01	-8.470462e+01
1.600000e+01	1.237331e+02	-1.513766e+02	-6.802282e+01	-1.169587e+02	-9.825047e+01	-5.276593e+01	-5.962049e+01	-6.187067e+01	-5.932225e+01	-9.414049e+01	-9.361622e+01	-9.159212e+01	-1.176437e+02	-1.156197e+02	-1.058854e+02	-5.866662e+01	-6.765225e+01	-7.046423e+01
1.700000e+01	1.212287e+02	-1.287668e+02	-5.631036e+01	-9.635688e+01	-8.251015e+01	-4.312118e+01	-4.848102e+01	-5.145653e+01	-4.918514e+01	-7.844098e+01	-7.780698e+01	-7.616963e+01	-9.825560e+01	-9.661830e+01	-8.808088e+01	-4.763544e+01	-5.707281e+01	-5.968011e+01
1.800000e+01	1.232532e+02	-1.121972e+02	-4.719111e+01	-8.098538e+01	-7.132229e+01	-3.610630e+01	-4.013820e+01	-4.321942e+01	-4.116477e+01	-6.617549e+01	-6.547913e+01	-6.412087e+01	-8.314579e+01	-8.178756e+01	-7.419570e+01	-3.900386e+01	-4.912046e+01	-5.136122e+01
1.900000e+01	1.292563e+02	-9.946246e+01	-3.974036e+01	-6.912796e+01	-6.322776e+01	-3.086891e+01	-3.381229e+01	-3.662345e+01	-3.474647e+01	-5.644576e+01	-5.573600e+01	-5.456882e+01	-7.117163e+01	-7.000446e+01	-6.320359e+01	-3.203547e+01	-4.307694e+01	-4.486595e+01
2.000000e+01	1.385644e+02	-8.865024e+01	-3.324708e+01	-5.944152e+01	-5.703959e+01	-2.669855e+01	-2.893065e+01	-3.132414e+01	-2.960618e+01	-4.862800e+01	-4.794943e+01	-4.691007e+01	-6.152502e+01	-6.048565e+01	-5.439731e+01	-2.625106e+01	-3.839637e+01	-3.974909e+01
2.100000e+01	1.503727e+02	-7.816137e+01	-2.722021e+01	-5.082239e+01	-5.171608e+01	-2.296429e+01	-2.500279e+01	-2.707429e+01	-2.551772e+01	-4.223977e+01	-4.162529e+01	-4.068321e+01	-5.357411e+01	-5.263202e+01	-4.723726e+01	-2.131937e+01	-3.461937e+01	-3.566265e+01
2.200000e+01	1.638768e+02	-6.683244e+01	-2.141028e+01	-4.241870e+01	-4.636670e+01	-1.912993e+01	-2.157759e+01	-2.366932e+01	-2.229627e+01	-3.688131e+01	-3.634533e+01	-3.550828e+01	-4.679973e+01	-4.596266e+01	-4.128120e+01	-1.700674e+01	-3.134250e+01	-3.230435e+01
2.300000e+01	1.784424e+02	-5.404271e+01	-1.579493e+01	-3.369806e+01	-4.031953e+01	-1.480453e+01	-1.825333e+01	-2.091978e+01	-1.976762e+01	-3.222536e+01	-3.176085e+01	-3.107321e+01	-4.079214e+01	-4.010447e+01	-3.616868e+01	-1.315355e+01	-2.822306e+01	-2.939678e+01
2.400000e+01	1.937141e+02	-3.974282e+01	-1.051463e+01	-2.449799e+01	-3.318996e+01	-9.791265e+00	-1.471455e+01	-1.864114e+01	-1.775538e+01	-2.802598e+01	-2.760910e+01	-2.714023e+01	-3.526916e+01	-3.480026e+01	-3.162993e+01	-9.658248e+00	-2.499777e+01	-2.668228e+01
2.500000e+01	2.096060e+02	-2.440578e+01	-5.781650e+00	-1.502223e+01	-2.491720e+01	-4.111305e+00	-1.077713e+01	-1.665617e+01	-1.608242e+01	-2.412469e+01	-2.372853e+01	-2.355095e+01	-3.008590e+01	-2.990829e+01	-2.749515e+01	-6.466090e+00	-2.149931e+01	-2.392648e+01
2.600000e+01	2.261886e+02	-8.941009e+00	-1.802712e+00	-5.784215e+00	-1.576586e+01	2.002704e+00	-6.430561e+00	-1.480771e+01	-1.458433e+01	-2.044328e+01	-2.005873e+01	-2.021991e+01	-2.522133e+01	-2.538249e+01	-2.369039e+01	-3.570811e+00	-1.766333e+01	-2.093085e+01
2.700000e+01	2.435380e+02	5.387636e+00	1.253473e+00	2.476861e+00	-6.307946e+00	8.135425e+00	-1.868924e+00	-1.297806e+01	-1.313029e+01	-1.696365e+01	-1.662085e+01	-1.711589e+01	-2.074129e+01	-2.123630e+01	-2.021626e+01	-1.036122e+00	-1.352570e+01	-1.755599e+01
2.800000e+01	2.616372e+02	1.703361e+01	3.242859e+00	8.879811e+00	2.600695e+00	1.372742e+01	2.498727e+00	-1.110738e+01	-1.164350e+01	-1.370109e+01	-1.348267e+01	-1.423722e+01	-1.674811e+01	-1.750263e+01	-1.711314e+01	9.679938e-01	-9.213720e+00	-1.375375e+01
2.900000e+01	2.803934e+02	2.426654e+01	4.019751e+00	1.247351e+01	9.852886e+00	1.811781e+01	6.070069e+00	-9.201869e+00	-1.011173e+01	-1.068007e+01	-1.071819e+01	-1.158993e+01	-1.333213e+01	-1.420385e+01	-1.442272e+01	2.134490e+00	-4.935520e+00	-9.599901e+00
3.000000e+01	2.997852e+02	2.535437e+01	3.444882e+00	1.230685e+01	1.415420e+01	2.059743e+01	8.113295e+00	-7.325117e+00	-8.581728e+00	-7.919686e+00	-8.373942e+00	-9.176301e+00	-1.054082e+01	-1.134316e+01	-1.215764e+01	2.021962e+00	-9.699251e-01	-5.314852e+00
3.100000e+01	3.200896e+02	1.886128e+01	1.458511e+00	7.518049e+00	1.414736e+01	2.048653e+01	7.874748e+00	-5.572425e+00	-7.137249e+00	-5.431969e+00	-6.452178e+00	-6.996799e+00	-8.376922e+00	-8.921525e+00	-1.029056e+01	1.125414e-01	2.344108e+00	-1.260807e+00
3.200000e+01	3.420944e+02	4.036371e+00	-1.792754e+00	-2.540277e+00	8.612665e+00	1.724676e+01	4.719592e+00	-4.035398e+00	-5.867189e+00	-3.230468e+00	-4.914784e+00	-5.062266e+00	-6.827881e+00	-6.975347e+00	-8.766945e+00	-4.071862e+00	4.623476e+00	2.090703e+00
3.300000e+01	3.671798e+02	-1.879257e+01	-5.830683e+00	-1.814120e+01	-3.266298e+00	1.062020e+01	-1.716467e+00	-2.768548e+00	-4.834186e+00	-1.341638e+00	-3.703165e+00	-3.407285e+00	-5.916443e+00	-5.620552e+00	-7.536583e+00	-1.081420e+01	5.470571e+00	4.220002e+00
3.400000e+01	3.971675e+02	-4.794001e+01	-9.796046e+00	-3.901087e+01	-2.161220e+01	7.672423e-01	-1.139141e+01	-1.768820e+00	-4.053439e+00	1.906102e-01	-2.762610e+00	-2.094020e+00	-5.749534e+00	-5.080939e+00	-6.588288e+00	-2.004455e+01	4.525279e+00	4.642617e+00
3.500000e+01	4.338930e+02	-8.031127e+01	-1.252929e+01	-6.418285e+01	-4.560284e+01	-1.163908e+01	-2.376310e+01	-9.730909e-01	-3.486360e+00	1.313751e+00	-2.058610e+00	-1.199529e+00	-6.536345e+00	-5.677268e+00	-5.968821e+00	-3.122491e+01	1.542950e+00	3.005415e+00
3.600000e+01	4.785573e+02	-1.116518e+02	-1.278373e+01	-9.193178e+01	-7.333876e+01	-2.540533e+01	-3.776143e+01	-2.708715e-01	-3.046701e+00	1.987707e+00	-1.578368e+00	-7.881337e-01	-8.552119e+00	-7.761901e+00	-5.772424e+00	-4.332098e+01	-3.509565e+00	-8.158713e-01
3.700000e+01	5.310323e+02	-1.371095e+02	-9.515498e+00	-1.198448e+02	-1.019109e+02	-3.892573e+01	-5.184982e+01	4.760039e-01	-2.611581e+00	2.208023e+00	-1.320083e+00	-8.795700e-01	-1.204344e+01	-1.160296e+01	-6.101503e+00	-5.489509e+01	-1.036271e+01	-6.632676e+00
3.800000e+01	5.893772e+02	-1.520503e+02	-2.158012e+00	-1.450788e+02	-1.277283e+02	-5.041152e+01	-6.419588e+01	1.415011e+00	-2.029661e+00	2.016545e+00	-1.279660e+00	-1.428132e+00	-1.709821e+01	-1.724673e+01	-7.014754e+00	-6.433201e+01	-1.839262e+01	-1.389375e+01
3.900000e+01	6.498184e+02	-1.529843e+02	9.210350e+00	-1.648110e+02	-1.471080e+02	-5.821427e+01	-7.295371e+01	2.689012e+00	-1.124528e+00	1.488973e+00	-1.444739e+00	-2.324567e+00	-2.352733e+01	-2.440721e+01	-8.487786e+00	-7.017043e+01	-2.664454e+01	-2.169408e+01
4.000000e+01	7.073112e+02	-1.383914e+02	2.385970e+01	-1.768150e+02	-1.570372e+02	-6.117985e+01	-7.662289e+01	4.423043e+00	2.998319e-01	7.006911e-01	-1.799498e+00	-3.422513e+00	-3.081182e+01	-3.243490e+01	-1.040731e+01	-7.146530e+01	-3.395175e+01	-2.886386e+01
4.100000e+01	7.565834e+02	-1.092079e+02	4.056089e+01	-1.800093e+02	-1.559204e+02	-5.893775e+01	-7.440270e+01	6.704663e+00	2.438523e+00	-3.138898e-01	-2.335386e+00	-4.580013e+00	-3.815265e+01	-4.039736e+01	-1.260429e+01	-6.807020e+01	-3.914174e+01	-3.414357e+01
4.200000e+01	7.933450e+02	-6.879433e+01	5.783918e+01	-1.747818e+02	-1.440725e+02	-5.202378e+01	-6.642980e+01	9.554088e+00	5.440063e+00	-1.585957e+00	-3.058682e+00	-5.699954e+00	-4.462394e+01	-4.726529e+01	-1.491214e+01	-6.073003e+01	-4.128921e+01	-3.642455e+01
4.300000e+01	8.152492e+02	-2.235381e+01	7.423977e+01	-1.629330e+02	-1.237631e+02	-4.176981e+01	-5.380226e+01	1.288943e+01	9.338466e+00	-3.203422e+00	-3.988406e+00	-6.754344e+00	-4.938885e+01	-5.215487e+01	-1.722308e+01	-5.092687e+01	-3.995097e+01	-3.500513e+01
4.400000e+01	8.222668e+02	2.404967e+01	8.851881e+01	-1.472175e+02	-9.875101e+01	-2.997296e+01	-3.835844e+01	1.650190e+01	1.398424e+01	-5.267050e+00	-5.145123e+00	-7.784650e+00	-5.190966e+01	-5.454927e+01	-1.951640e+01	-4.051017e+01	-3.531300e+01	-2.979232e+01
4.500000e+01	8.163733e+02	6.459278e+01	9.971377e+01	-1.306258e+02	-7.343123e+01	-1.844979e+01	-2.226998e+01	2.005907e+01	1.900807e+01	-7.828874e+00	-6.537344e+00	-8.879792e+00	-5.208148e+01	-5.442400e+01	-2.184616e+01	-3.122679e+01	-2.819699e+01	-2.138018e+01
4.600000e+01	8.007241e+02	9.462148e+01	1.071076e+02	-1.156679e+02	-5.185068e+01	-8.637993e+00	-7.578077e+00	2.314771e+01	2.384829e+01	-1.084140e+01	-8.153210e+00	-1.014072e+01	-5.024496e+01	-5.223252e+01	-2.429507e+01	-2.430413e+01	-1.991014e+01	-1.096280e+01
4.700000e+01	7.786958e+02	1.112204e+02	1.101523e+02	-1.039109e+02	-3.688582e+01	-1.389957e+00	4.186754e+00	2.535241e+01	2.785178e+01	-1.414343e+01	-9.961206e+00	-1.164394e+01	-4.707618e+01	-4.875896e+01	-2.691699e+01	-2.021184e+01	-1.196645e+01	-8.750329e-02
4.800000e+01	7.531862e+02	1.133914e+02	1.084319e+02	-9.589789e+01	-2.979401e+01	2.990136e+00	1.221208e+01	2.635002e+01	3.042660e+01	-1.749320e+01	-1.191867e+01	-1.341648e+01	-4.339413e+01	-4.489198e+01	-2.969449e+01	-1.865170e+01	-5.748915e+00	9.692454e+00
4.900000e+01	7.264139e+02	1.019275e+02	1.017114e+02	-9.140019e+01	-3.020765e+01	4.534117e+00	1.642878e+01	2.598932e+01	3.119724e+01	-2.063981e+01	-1.398464e+01	-1.543174e+01	-3.995235e+01	-4.139948e+01	-3.253062e+01	-1.874239e+01	-2.204480e+00	1.716708e+01
5.000000e+01	7.001995e+02	7.910361e+01	9.006196e+01	-8.982586e+01	-3.649979e+01	3.370178e+00	1.740636e+01	2.432841e+01	3.010664e+01	-2.340879e+01	-1.613494e+01	-1.763041e+01	-3.728232e+01	-3.877781e+01	-3.527859e+01	-1.931428e+01	-1.659065e+00	2.171525e+01
5.100000e+01	6.764758e+02	4.827779e+01	7.399555e+01	-9.058104e+01	-4.636138e+01	-4.031098e-01	1.618673e+01	2.161698e+01	2.742787e+01	-2.577248e+01	-1.837869e+01	-1.996143e+01	-3.563269e+01	-3.721546e+01	-3.779731e+01	-1.921995e+01	-3.804824e+00	2.337388e+01
5.200000e+01	6.576818e+02	1.345105e+01	5.453598e+01	-9.325311e+01	-5.740501e+01	-6.674121e+00	1.410022e+01	1.823272e+01	2.368532e+01	-2.788143e+01	-2.077432e+01	-2.242868e+01	-3.501082e+01	-3.666522e+01	-4.001091e+01	-1.758766e+01	-7.856683e+00	2.272064e+01
5.300000e+01	6.467642e+02	-2.118876e+01	3.317591e+01	-9.759738e+01	-6.763472e+01	-1.516380e+01	1.257399e+01	1.459946e+01	1.952186e+01	-3.004500e+01	-2.343829e+01	-2.512246e+01	-3.529432e+01	-3.697852e+01	-4.194866e+01	-1.397199e+01	-1.281947e+01	2.062717e+01
5.400000e+01	6.467172e+02	-5.171194e+01	1.172012e+01	-1.033972e+02	-7.568027e+01	-2.528717e+01	1.292772e+01	1.111964e+01	1.556628e+01	-3.266333e+01	-2.653569e+01	-2.821655e+01	-3.635651e+01	-3.803742e+01	-4.374869e+01	-8.379196e+00	-1.777281e+01	1.798135e+01
5.500000e+01	6.598198e+02	-7.485006e+01	-7.948935e+00	-1.102993e+02	-8.077547e+01	-3.614785e+01	1.616351e+01	8.142151e+00	1.234464e+01	-3.612496e+01	-3.024304e+01	-3.192236e+01	-3.814788e+01	-3.982726e+01	-4.562036e+01	-1.166957e+00	-2.208229e+01	1.547551e+01
5.600000e+01	6.868624e+02	-8.832824e+01	-2.413407e+01	-1.177058e+02	-8.254773e+01	-4.669964e+01	2.278167e+01	5.963492e+00	1.024845e+01	-4.069239e+01	-3.468239e+01	-3.640733e+01	-4.069764e+01	-4.242265e+01	-4.777284e+01	7.150657e+00	-2.547965e+01	1.351486e+01
5.700000e+01	7.266396e+02	-9.110136e+01	-3.557055e+01	-1.247621e+02	-8.075336e+01	-5.600474e+01	3.266951e+01	4.838290e+00	9.539235e+00	-4.640109e+01	-3.984025e+01	-4.170006e+01	-4.403658e+01	-4.589645e+01	-5.032832e+01	1.612646e+01	-2.800719e+01	1.224243e+01
5.800000e+01	7.758522e+02	-8.346176e+01	-4.161802e+01	-1.304372e+02	-7.510649e+01	-6.345350e+01	4.510469e+01	4.968654e+00	1.035281e+01	-5.299669e+01	-4.549852e+01	-4.761246e+01	-4.808014e+01	-5.019415e+01	-5.324560e+01	2.554363e+01	-2.986956e+01	1.163155e+01
5.900000e+01	8.293995e+02	-6.697411e+01	-4.235688e+01	-1.336640e+02	-6.529566e+01	-6.882429e+01	5.888680e+01	6.455357e+00	1.267659e+01	-5.993056e+01	-5.121080e+01	-5.370924e+01	-5.253254e+01	-5.503105e+01	-5.628171e+01	3.544649e+01	-3.126368e+01	1.158437e+01
6.000000e+01	8.809623e+02	-4.419992e+01	-3.855237e+01	-1.334955e+02	-5.117837e+01	-7.214831e+01	7.257451e+01	9.221962e+00	1.630181e+01	-6.642466e+01	-5.634931e+01	-5.934473e+01	-5.686757e+01	-5.986306e+01	-5.901251e+01	4.602131e+01	-3.225581e+01	1.199343e+01
6.100000e+01	9.237835e+02	-1.822122e+01	-3.147410e+01	-1.292350e+02	-3.304316e+01	-7.345533e+01	8.477289e+01	1.294977e+01	2.078253e+01	-7.160234e+01	-6.022520e+01	-6.376949e+01	-6.040978e+01	-6.395414e+01	-6.091639e+01	5.738176e+01	-3.274790e+01	1.275627e+01
6.200000e+01	9.516048e+02	7.951141e+00	-2.260429e+01	-1.205166e+02	-1.178289e+01	-7.255052e+01	9.439734e+01	1.707036e+01	2.544579e+01	-7.466233e+01	-6.225476e+01	-6.628682e+01	-6.249398e+01	-6.652609e+01	-6.150221e+01	6.936334e+01	-3.253485e+01	1.376137e+01
6.300000e+01	9.597019e+02	3.193576e+01	-1.331318e+01	-1.073352e+02	1.113989e+01	-6.896514e+01	1.008444e+02	2.084630e+01	2.948351e+01	-7.505538e+01	-6.211933e+01	-6.641810e+01	-6.264403e+01	-6.694283e+01	-6.044189e+01	8.142896e+01	-3.141597e+01	1.487411e+01
6.400000e+01	9.458659e+02	5.235454e+01	-4.595087e+00	-9.004378e+01	3.395759e+01	-6.213670e+01	1.040277e+02	2.353522e+01	3.212227e+01	-7.261360e+01	-5.986070e+01	-6.402649e+01	-6.070142e+01	-6.486722e+01	-5.766135e+01	9.273554e+01	-2.930402e+01	1.594518e+01
6.500000e+01	9.110474e+02	6.894316e+01	3.070844e+00	-6.933364e+01	5.500774e+01	-5.175031e+01	1.042823e+02	2.459430e+01	3.282899e+01	-6.758996e+01	-5.587269e+01	-5.935523e+01	-5.685593e+01	-6.033847e+01	-5.335544e+01	1.023395e+02	-2.628012e+01	1.684904e+01
6.600000e+01	8.593694e+02	8.242898e+01	9.727167e+00	-4.619541e+01	7.314282e+01	-3.807854e+01	1.021947e+02	2.385995e+01	3.148800e+01	-6.059044e+01	-5.078681e+01	-5.296235e+01	-5.157139e+01	-5.374692e+01	-4.792004e+01	1.094645e+02	-2.257019e+01	1.754358e+01
6.700000e+01	7.973738e+02	9.429091e+01	1.585344e+01	-2.184004e+01	8.800266e+01	-2.214022e+01	9.844087e+01	2.163945e+01	2.848745e+01	-5.241661e+01	-4.528978e+01	-4.556860e+01	-4.543931e+01	-4.571811e+01	-4.182513e+01	1.137417e+02	-1.845455e+01	1.813132e+01
6.800000e+01	7.326679e+02	1.065242e+02	2.224579e+01	2.451220e+00	1.000785e+02	-5.568506e+00	9.371439e+01	1.867790e+01	2.468000e+01	-4.386748e+01	-3.993508e+01	-3.786539e+01	-3.901378e+01	-3.694406e+01	-3.547366e+01	1.153563e+02	-1.414988e+01	1.889742e+01
6.900000e+01	6.724002e+02	1.214640e+02	2.989399e+01	2.556254e+01	1.105815e+02	9.798597e+00	8.876960e+01	1.600122e+01	2.122042e+01	-3.556331e+01	-3.501103e+01	-3.034413e+01	-3.267859e+01	-2.801166e+01	-2.909438e+01	1.150746e+02	-9.711491e+00	2.030221e+01
7.000000e+01	6.220650e+02	1.416197e+02	3.985200e+01	4.684143e+01	1.211876e+02	2.247078e+01	8.453742e+01	1.467333e+01	1.931814e+01	-2.784420e+01	-3.050431e+01	-2.319942e+01	-2.657941e+01	-1.927449e+01	-2.270348e+01	1.141580e+02	-4.993092e+00	2.291579e+01
7.100000e+01	5.849531e+02	1.694004e+02	5.307438e+01	6.638234e+01	1.337377e+02	3.179749e+01	8.220825e+01	1.552951e+01	1.996408e+01	-2.076826e+01	-2.616393e+01	-1.633372e+01	-2.063137e+01	-1.080115e+01	-1.614568e+01	1.141820e+02	3.205396e-01	2.729716e+01
7.200000e+01	5.622507e+02	2.066257e+02	7.019747e+01	8.517115e+01	1.499337e+02	3.820388e+01	8.316635e+01	1.895609e+01	2.369662e+01	-1.419962e+01	-2.163877e+01	-9.459128e+00	-1.459522e+01	-2.415558e+00	-9.200450e+00	1.167783e+02	6.613251e+00	3.383661e+01
7.300000e+01	5.535174e+02	2.538268e+02	9.128221e+01	1.049549e+02	1.710235e+02	4.305876e+01	8.871327e+01	2.477548e+01	3.046164e+01	-7.950448e+00	-1.664276e+01	-2.264336e+00	-8.202333e+00	6.176099e+00	-1.719956e+00	1.233132e+02	1.419009e+01	4.259361e+01
7.400000e+01	5.572008e+02	3.095157e+02	1.155859e+02	1.277597e+02	1.974531e+02	4.819505e+01	9.962129e+01	3.227038e+01	3.960120e+01	-1.928603e+00	-1.109760e+01	5.402162e+00	-1.299507e+00	1.520026e+01	6.243894e+00	1.345346e+02	2.311359e+01	5.316930e+01
7.500000e+01	5.709849e+02	3.697462e+02	1.414683e+02	1.551155e+02	2.285092e+02	5.523957e+01	1.156676e+02	4.034399e+01	4.997665e+01	3.755027e+00	-5.211782e+00	1.338762e+01	6.024066e+00	2.462346e+01	1.436400e+01	1.502519e+02	3.306425e+01	6.465376e+01
7.600000e+01	5.920031e+02	4.283113e+02	1.665357e+02	1.872113e+02	2.620631e+02	6.499667e+01	1.353607e+02	4.777502e+01	6.019987e+01	8.753234e+00	5.285610e-01	2.117800e+01	1.336868e+01	3.401811e+01	2.204313e+01	1.691514e+02	4.327294e+01	7.568155e+01
7.700000e+01	6.171017e+02	4.777558e+02	1.880624e+02	2.223200e+02	2.945882e+02	7.712545e+01	1.560384e+02	5.349754e+01	6.891796e+01	1.253751e+01	5.458123e+00	2.795783e+01	2.004819e+01	4.254787e+01	2.850814e+01	1.888574e+02	5.256968e+01	8.461181e+01
7.800000e+01	6.433239e+02	5.110617e+02	2.036251e+02	2.567969e+02	3.215976e+02	9.024308e+01	1.743923e+02	5.682784e+01	7.508028e+01	1.453099e+01	8.895699e+00	3.278332e+01	2.521674e+01	4.910434e+01	3.297677e+01	2.063044e+02	5.956888e+01	8.981988e+01
7.900000e+01	6.685885e+02	5.235227e+02	2.117665e+02	2.857665e+02	3.385111e+02	1.024140e+02	1.872980e+02	5.757845e+01	7.812112e+01	1.428256e+01	1.032500e+01	3.482512e+01	2.807448e+01	5.257457e+01	3.485513e+01	2.183826e+02	6.296618e+01	9.004894e+01
8.000000e+01	6.923173e+02	5.141393e+02	2.124431e+02	3.043249e+02	3.417647e+02	1.118207e+02	1.926831e+02	5.603825e+01	7.801704e+01	1.162555e+01	9.535202e+00	3.360422e+01	2.809505e+01	5.216405e+01	3.390816e+01	2.227046e+02	6.187134e+01	8.473565e+01
8.100000e+01	7.156625e+02	4.859648e+02	2.070514e+02	3.088497e+02	3.298175e+02	1.173362e+02	1.901192e+02	5.284093e+01	7.521669e+01	6.762887e+00	6.673023e+00	2.913853e+01	2.520117e+01	4.766666e+01	3.034658e+01	2.182570e+02	5.607151e+01	7.421219e+01
8.200000e+01	7.411037e+02	4.451864e+02	1.979665e+02	2.979466e+02	3.036909e+02	1.187679e+02	1.809079e+02	4.877572e+01	7.047910e+01	2.428673e-01	2.188782e+00	2.194613e+01	1.982500e+01	3.958234e+01	2.479624e+01	2.057059e+02	4.613073e+01	5.970955e+01
8.300000e+01	7.714727e+02	3.992040e+02	1.877212e+02	2.726998e+02	2.668103e+02	1.166973e+02	1.676087e+02	4.460162e+01	6.467777e+01	-7.168858e+00	-3.300672e+00	1.290720e+01	1.282660e+01	2.903447e+01	1.815380e+01	1.872234e+02	3.328457e+01	4.314219e+01
8.400000e+01	8.087712e+02	3.543458e+02	1.781112e+02	2.361755e+02	2.241512e+02	1.120206e+02	1.531616e+02	4.091013e+01	5.862663e+01	-1.467355e+01	-9.176592e+00	3.042858e+00	5.292475e+00	1.751193e+01	1.137162e+01	1.658571e+02	1.916286e+01	2.672150e+01
8.500000e+01	8.532889e+02	3.139913e+02	1.695599e+02	1.923998e+02	1.809308e+02	1.054170e+02	1.398991e+02	3.805342e+01	5.296213e+01	-2.161007e+01	-1.494693e+01	-6.701434e+00	-1.722301e+00	6.523205e+00	5.239175e+00	1.446233e+02	5.432928e+00	1.249875e+01
8.600000e+01	9.034117e+02	2.777323e+02	1.609896e+02	1.451982e+02	1.412320e+02	9.698666e+01	1.287744e+02	3.612964e+01	4.808831e+01	-2.755157e+01	-2.029608e+01	-1.559295e+01	-7.427953e+00	-2.724813e+00	2.271266e-01	1.256014e+02	-6.523083e+00	1.958437e+00
8.700000e+01	9.561925e+02	2.418580e+02	1.502632e+02	9.728771e+01	1.069809e+02	8.620423e+01	1.190584e+02	3.500664e+01	4.417064e+01	-3.230438e+01	-2.505187e+01	-2.314044e+01	-1.144209e+01	-9.530628e+00	-3.565750e+00	1.093188e+02	-1.580741e+01	-4.233913e+00
8.800000e+01	1.008392e+03	2.010469e+02	1.350625e+02	4.988913e+01	7.761036e+01	7.218968e+01	1.086066e+02	3.436917e+01	4.115980e+01	-3.583002e+01	-2.910361e+01	-2.903943e+01	-1.380820e+01	-1.374398e+01	-6.360796e+00	9.463822e+01	-2.204581e+01	-6.270442e+00
8.900000e+01	1.057489e+03	1.507788e+02	1.139204e+02	2.944629e+00	5.056270e+01	5.417202e+01	9.462607e+01	3.378449e+01	3.883420e+01	-3.814308e+01	-3.232320e+01	-3.309340e+01	-1.490242e+01	-1.567258e+01	-8.576136e+00	7.921323e+01	-2.528792e+01	-5.024891e+00
9.000000e+01	1.102216e+03	8.973367e+01	8.707319e+01	-4.416908e+01	2.253538e+01	3.196140e+01	7.472653e+01	3.278577e+01	3.685851e+01	-3.924248e+01	-3.453486e+01	-3.516976e+01	-1.527470e+01	-1.590955e+01	-1.068284e+01	6.040525e+01	-2.583154e+01	-1.718985e+00
9.100000e+01	1.142428e+03	2.135778e+01	5.683285e+01	-9.170090e+01	-8.897452e+00	6.265908e+00	4.795122e+01	3.096600e+01	3.485640e+01	-3.911049e+01	-3.555173e+01	-3.522012e+01	-1.548284e+01	-1.515117e+01	-1.308741e+01	3.638918e+01	-2.404782e+01	2.465713e+00
9.200000e+01	1.178492e+03	-4.606790e+01	2.729626e+01	-1.387218e+02	-4.385629e+01	-2.123852e+01	1.546730e+01	2.806293e+01	3.248640e+01	-3.777655e+01	-3.526565e+01	-3.335311e+01	-1.596718e+01	-1.405458e+01	-1.606582e+01	7.077886e+00	-2.027128e+01	6.707724e+00
9.300000e+01	1.210580e+03	-1.011101e+02	3.396264e+00	-1.828041e+02	-7.951111e+01	-4.809014e+01	-1.933174e+01	2.400945e+01	2.950162e+01	-3.540771e+01	-3.375043e+01	-2.991556e+01	-1.698727e+01	-1.315234e+01	-1.974682e+01	-2.548903e+01	-1.478496e+01	1.069382e+01
9.400000e+01	1.238277e+03	-1.322605e+02	-1.047587e+01	-2.203748e+02	-1.105844e+02	-7.141244e+01	-5.140182e+01	1.893219e+01	2.577581e+01	-3.237149e+01	-3.133006e+01	-2.552790e+01	-1.861498e+01	-1.281276e+01	-2.412306e+01	-5.749056e+01	-7.888065e+00	1.455163e+01
9.500000e+01	1.260652e+03	-1.314633e+02	-1.184923e+01	-2.476644e+02	-1.309339e+02	-8.837448e+01	-7.518166e+01	1.310287e+01	2.129423e+01	-2.922635e+01	-2.857264e+01	-2.103502e+01	-2.076311e+01	-1.322542e+01	-2.906533e+01	-8.434027e+01	2.758131e-03	1.860538e+01
9.600000e+01	1.276669e+03	-9.685783e+01	-1.057328e+00	-2.619025e+02	-1.356799e+02	-9.663752e+01	-8.596669e+01	6.867423e+00	1.612693e+01	-2.662685e+01	-2.619655e+01	-1.736735e+01	-2.322904e+01	-1.439979e+01	-3.432808e+01	-1.020389e+02	8.282654e+00	2.306477e+01
9.700000e+01	1.285618e+03	-3.371156e+01	1.873606e+01	-2.622745e+02	-1.230676e+02	-9.471057e+01	-8.110900e+01	5.855308e-01	1.041035e+01	-2.516914e+01	-2.490803e+01	-1.534434e+01	-2.574304e+01	-1.617929e+01	-3.955356e+01	-1.083781e+02	1.616896e+01	2.778257e+01
9.800000e+01	1.287269e+03	4.682151e+01	4.241997e+01	-2.502495e+02	-9.532802e+01	-8.218006e+01	-6.068398e+01	-5.399192e+00	4.353072e+00	-2.523234e+01	-2.521820e+01	-1.548009e+01	-2.801890e+01	-1.828074e+01	-4.429402e+01	-1.035603e+02	2.280594e+01	3.218374e+01
9.900000e+01	1.281694e+03	1.306633e+02	6.441597e+01	-2.291777e+02	-5.819740e+01	-5.981567e+01	-2.745236e+01	-1.076001e+01	-1.740768e+00	-2.687570e+01	-2.729864e+01	-1.785648e+01	-2.980428e+01	-2.036207e+01	-4.806799e+01	-9.003989e+01	2.743366e+01	3.539339e+01
1.000000e+02	1.268941e+03	2.044432e+02	8.020637e+01	-2.033801e+02	-1.929265e+01	-2.956180e+01	1.381998e+01	-1.517851e+01	-7.455924e+00	-2.983070e+01	-3.092394e+01	-2.210813e+01	-3.092052e+01	-2.210466e+01	-5.044844e+01	-7.170070e+01	2.956179e+01	3.650964e+01
1.010000e+02	1.248825e+03	2.586231e+02	8.737295e+01	-1.771261e+02	1.404303e+01	5.603080e+00	5.744857e+01	-1.834930e+01	-1.228574e+01	-3.358815e+01	-3.551878e+01	-2.752460e+01	-3.127756e+01	-2.328333e+01	-5.115844e+01	-5.271858e+01	2.908696e+01	3.491367e+01
1.020000e+02	1.221044e+03	2.892788e+02	8.585349e+01	-1.538514e+02	3.667432e+01	4.199116e+01	9.803012e+01	-2.000876e+01	-1.569781e+01	-3.754337e+01	-4.029031e+01	-3.323243e+01	-3.085545e+01	-2.379752e+01	-5.013769e+01	-3.651375e+01	2.631543e+01	3.050183e+01
1.030000e+02	1.185574e+03	2.982657e+02	7.746674e+01	-1.357515e+02	4.680541e+01	7.575737e+01	1.315014e+02	-1.998240e+01	-1.723268e+01	-4.114290e+01	-4.439973e+01	-3.839319e+01	-2.965867e+01	-2.365208e+01	-4.754910e+01	-2.508431e+01	2.188733e+01	2.375799e+01
1.040000e+02	1.143167e+03	2.920152e+02	6.502415e+01	-1.236764e+02	4.607169e+01	1.036417e+02	1.558772e+02	-1.823402e+01	-1.660629e+01	-4.398294e+01	-4.712013e+01	-4.235521e+01	-2.766267e+01	-2.289770e+01	-4.371688e+01	-1.881759e+01	1.663042e+01	1.564397e+01
1.050000e+02	1.095716e+03	2.794900e+02	5.142135e+01	-1.171700e+02	3.871046e+01	1.237367e+02	1.715455e+02	-1.489962e+01	-1.378751e+01	-4.583703e+01	-4.794279e+01	-4.472492e+01	-2.477387e+01	-2.155595e+01	-3.901597e+01	-1.670788e+01	1.139015e+01	7.348702e+00
1.060000e+02	1.046331e+03	2.698772e+02	3.898715e+01	-1.145688e+02	3.017070e+01	1.360159e+02	1.810509e+02	-1.029646e+01	-9.034416e+00	-4.662416e+01	-4.662037e+01	-4.536210e+01	-2.081590e+01	-1.955759e+01	-3.375314e+01	-1.682787e+01	6.883853e+00	-1.598891e-02
1.070000e+02	9.991267e+02	2.704994e+02	2.916441e+01	-1.132067e+02	2.560420e+01	1.423752e+02	1.883740e+02	-4.905989e+00	-2.887824e+00	-4.635076e+01	-4.315989e+01	-4.433258e+01	-1.554499e+01	-1.671765e+01	-2.808485e+01	-1.690186e+01	3.612891e+00	-5.671944e+00
1.080000e+02	9.587869e+02	2.853015e+02	2.243681e+01	-1.098477e+02	2.862757e+01	1.460871e+02	1.978413e+02	6.669812e-01	3.873897e+00	-4.506389e+01	-3.778984e+01	-4.185695e+01	-8.694685e+00	-1.276177e+01	-2.200354e+01	-1.486506e+01	1.841087e+00	-9.307896e+00
1.090000e+02	9.300145e+02	3.141533e+02	1.837843e+01	-1.013982e+02	4.061241e+01	1.508010e+02	2.129361e+02	5.757372e+00	1.031757e+01	-4.283766e+01	-3.092173e+01	-3.827744e+01	-5.248786e-02	-7.408186e+00	-1.539914e+01	-9.322284e+00	1.621144e+00	-1.106756e+01
1.100000e+02	9.169552e+02	3.530936e+02	1.577487e+01	-8.578927e+01	6.060166e+01	1.594126e+02	2.353543e+02	9.725789e+00	1.547867e+01	-3.979308e+01	-2.311316e+01	-3.404016e+01	1.043268e+01	-4.943218e-01	-8.174349e+00	1.698506e-01	2.835632e+00	-1.142644e+01
1.110000e+02	9.226530e+02	3.954791e+02	1.285981e+01	-6.275499e+01	8.580019e+01	1.731835e+02	2.645952e+02	1.206409e+01	1.852326e+01	-3.613290e+01	-1.502613e+01	-2.967370e+01	2.253221e+01	7.884615e+00	-3.702694e-01	1.306288e+01	5.224458e+00	-1.102176e+01
1.120000e+02	9.485717e+02	4.337985e+02	7.733753e+00	-3.418084e+01	1.124671e+02	1.913932e+02	2.982124e+02	1.250682e+01	1.892841e+01	-3.216515e+01	-7.368497e+00	-2.574354e+01	3.565420e+01	1.727913e+01	7.748937e+00	2.804624e+01	8.394503e+00	-1.049416e+01
1.130000e+02	9.942008e+02	4.617045e+02	-1.050861e+00	-3.804678e+00	1.369578e+02	2.116024e+02	3.326202e+02	1.112146e+01	1.663872e+01	-2.829236e+01	-8.118154e-01	-2.277509e+01	4.885172e+01	2.688840e+01	1.569333e+01	4.350114e+01	1.183356e+01	-1.037009e+01
1.140000e+02	1.056784e+03	4.756952e+02	-1.389171e+01	2.371583e+01	1.566365e+02	2.304041e+02	3.641733e+02	8.343652e+00	1.214458e+01	-2.495595e+01	4.108841e+00	-2.115504e+01	6.095718e+01	3.569325e+01	2.283936e+01	5.804591e+01	1.496002e+01	-1.098562e+01
1.150000e+02	1.131251e+03	4.759287e+02	-2.976993e+01	4.410363e+01	1.704187e+02	2.444033e+02	3.901549e+02	4.930655e+00	6.437701e+00	-2.254223e+01	7.091940e+00	-2.103522e+01	7.082319e+01	4.269597e+01	2.859236e+01	7.098328e+01	1.722176e+01	-1.244409e+01
1.160000e+02	1.210476e+03	4.659086e+02	-4.632126e+01	5.470489e+01	1.788114e+02	2.511352e+02	4.093612e+02	1.828971e+00	8.332339e-01	-2.127376e+01	8.133478e+00	-2.226956e+01	7.759161e+01	4.718850e+01	3.256263e+01	8.247649e+01	1.822237e+01	-1.460965e+01
1.170000e+02	1.286009e+03	4.511707e+02	-6.038517e+01	5.525443e+01	1.834767e+02	2.496788e+02	4.221244e+02	-1.820698e-02	-3.307540e+00	-2.112146e+01	7.530740e+00	-2.441088e+01	8.088750e+01	4.894580e+01	3.468762e+01	9.337994e+01	1.782420e+01	-1.714834e+01
1.180000e+02	1.349293e+03	4.374702e+02	-6.886155e+01	4.791593e+01	1.865090e+02	2.408356e+02	4.298272e+02	1.256446e-01	-4.882046e+00	-2.177342e+01	5.815320e+00	-2.678121e+01	8.086268e+01	4.826606e+01	3.525080e+01	1.047951e+02	1.617743e+01	-1.962032e+01
1.190000e+02	1.393218e+03	4.291348e+02	-6.956816e+01	3.661087e+01	1.897065e+02	2.268681e+02	4.341466e+02	2.631390e+00	-3.294028e+00	-2.268250e+01	3.629295e+00	-2.860802e+01	7.808137e+01	4.584394e+01	3.478890e+01	1.175416e+02	1.365668e+01	-2.160190e+01
1.200000e+02	1.413619e+03	4.281207e+02	-6.180426e+01	2.589114e+01	1.940945e+02	2.109056e+02	4.363470e+02	7.429324e+00	1.423497e+00	-2.319103e+01	1.579614e+00	-2.919696e+01	7.330995e+01	4.253326e+01	3.392372e+01	1.317636e+02	1.073184e+01	-2.279284e+01
1.210000e+02	1.410248e+03	4.339496e+02	-4.647178e+01	1.973514e+01	1.998165e+02	1.962041e+02	4.368905e+02	1.402905e+01	8.636849e+00	-2.270370e+01	1.132557e-01	-2.809600e+01	6.730462e+01	3.909523e+01	3.318094e+01	1.468108e+02	7.830580e+00	-2.306414e+01
1.220000e+02	1.386819e+03	4.443176e+02	-2.579438e+01	2.062045e+01	2.063309e+02	1.854493e+02	4.354563e+02	2.161671e+01	1.727282e+01	-2.086083e+01	-5.535141e-01	-2.520481e+01	6.067102e+01	3.601959e+01	3.285571e+01	1.613973e+02	5.247991e+00	-2.243055e+01
1.230000e+02	1.350029e+03	4.559560e+02	-2.801466e+00	2.908344e+01	2.127276e+02	1.802550e+02	4.312728e+02	2.919712e+01	2.605962e+01	-1.765921e+01	-4.387814e-01	-2.079678e+01	5.381838e+01	3.346024e+01	3.295830e+01	1.739213e+02	3.126447e+00	-2.097430e+01
1.240000e+02	1.307818e+03	4.653689e+02	1.924013e+01	4.379606e+01	2.179778e+02	1.809339e+02	4.235445e+02	3.574981e+01	3.378308e+01	-1.347841e+01	2.602769e-01	-1.544521e+01	4.697984e+01	3.127423e+01	3.324052e+01	1.827979e+02	1.489112e+00	-1.877378e+01
1.250000e+02	1.267406e+03	4.692989e+02	3.733264e+01	6.204514e+01	2.210343e+02	1.865491e+02	4.117726e+02	4.037766e+01	3.950115e+01	-8.994512e+00	1.258818e+00	-9.871074e+00	4.025179e+01	2.912178e+01	3.328162e+01	1.867100e+02	2.871824e-01	-1.588390e+01
1.260000e+02	1.233715e+03	4.649900e+02	4.915490e+01	8.042896e+01	2.208264e+02	1.952067e+02	3.958792e+02	4.243380e+01	4.267717e+01	-4.994373e+00	2.283180e+00	-4.751043e+00	3.361930e+01	2.658498e+01	3.260698e+01	1.847686e+02	-5.728776e-01	-1.237674e+01
1.270000e+02	1.208647e+03	4.504022e+02	5.335856e+01	9.558200e+01	2.162639e+02	2.045212e+02	3.761713e+02	4.161131e+01	4.321223e+01	-2.136577e+00	3.148841e+00	-5.356957e-01	2.696710e+01	2.328247e+01	3.081625e+01	1.766258e+02	-1.228268e+00	-8.405541e+00
1.280000e+02	1.191366e+03	4.244565e+02	4.971091e+01	1.047751e+02	2.063395e+02	2.121594e+02	3.532518e+02	3.797665e+01	4.137726e+01	-7.298804e-01	3.794783e+00	2.670695e+00	2.009968e+01	1.897552e+01	2.770072e+01	1.625690e+02	-1.862999e+00	-4.234665e+00
1.290000e+02	1.179402e+03	3.872498e+02	3.900942e+01	1.062881e+02	1.903253e+02	2.163566e+02	3.279666e+02	3.193114e+01	3.766710e+01	-6.070748e-01	4.263246e+00	5.128857e+00	1.279525e+01	1.366081e+01	2.332617e+01	1.435637e+02	-2.685167e+00	-1.973582e-01
1.300000e+02	1.170138e+03	3.400974e+02	2.271849e+01	9.950882e+01	1.679793e+02	2.163016e+02	3.014139e+02	2.410252e+01	3.262000e+01	-1.152061e+00	4.631987e+00	7.365406e+00	4.897071e+00	7.630454e+00	1.805446e+01	1.211666e+02	-3.866189e+00	3.407046e+00
1.310000e+02	1.162138e+03	2.852935e+02	2.379946e+00	8.477191e+01	1.396401e+02	2.123128e+02	2.749699e+02	1.519282e+01	2.665768e+01	-1.490991e+00	4.926140e+00	9.973865e+00	-3.582665e+00	1.465035e+00	1.248281e+01	9.724225e+01	-5.461654e+00	6.416615e+00
1.320000e+02	1.155859e+03	2.256098e+02	-2.101970e+01	6.302548e+01	1.061409e+02	2.057820e+02	2.502597e+02	5.826959e+00	1.999474e+01	-7.975151e-01	5.049159e+00	1.337027e+01	-1.238981e+01	-4.068716e+00	7.301253e+00	7.349626e+01	-7.356905e+00	8.837914e+00
1.330000e+02	1.153548e+03	1.636864e+02	-4.746445e+01	3.546542e+01	6.855924e+01	1.989048e+02	2.290157e+02	-3.554209e+00	1.264058e+01	1.388478e+00	4.768297e+00	1.758330e+01	-2.102675e+01	-8.211762e+00	3.100490e+00	5.095276e+01	-9.278123e+00	1.076572e+01
1.340000e+02	1.158438e+03	1.015353e+02	-7.788779e+01	3.294049e+00	2.790913e+01	1.942538e+02	2.128193e+02	-1.273174e+01	4.482474e+00	4.945385e+00	3.768408e+00	2.215965e+01	-2.883890e+01	-1.044768e+01	1.901596e-01	2.958278e+01	-1.088066e+01	1.221610e+01
1.350000e+02	1.173637e+03	4.033351e+01	-1.136620e+02	-3.229863e+01	-1.507968e+01	1.942558e+02	2.027797e+02	-2.167996e+01	-4.589017e+00	9.144197e+00	1.757576e+00	2.623521e+01	-3.517124e+01	-1.069362e+01	-1.505067e+00	8.278911e+00	-1.188628e+01	1.295438e+01
1.360000e+02	1.201190e+03	-1.944749e+01	-1.557621e+02	-6.994993e+01	-5.998631e+01	2.006411e+02	1.992395e+02	-3.049428e+01	-1.455888e+01	1.283134e+01	-1.416076e+00	2.876682e+01	-3.954737e+01	-9.364496e+00	-2.426997e+00	-1.474468e+01	-1.221185e+01	1.241677e+01
1.370000e+02	1.241657e+03	-7.767492e+01	-2.039341e+02	-1.078856e+02	-1.065078e+02	2.139473e+02	2.016008e+02	-3.930361e+01	-2.520597e+01	1.476016e+01	-5.683069e+00	2.885791e+01	-4.181474e+01	-7.273793e+00	-3.246953e+00	-4.122928e+01	-1.202958e+01	9.794073e+00
1.380000e+02	1.294248e+03	-1.341510e+02	-2.562249e+02	-1.438485e+02	-1.541374e+02	2.331789e+02	2.083230e+02	-4.818759e+01	-3.607423e+01	1.395480e+01	-1.073885e+01	2.606827e+01	-4.221407e+01	-5.406987e+00	-4.668065e+00	-7.208694e+01	-1.172441e+01	4.282561e+00
1.390000e+02	1.357265e+03	-1.883808e+02	-3.091046e+02	-1.753781e+02	-2.018646e+02	2.557237e+02	2.170871e+02	-5.710617e+01	-4.649124e+01	9.979808e+00	-1.610275e+01	2.059485e+01	-4.136397e+01	-4.666436e+00	-7.256243e+00	-1.068701e+02	-1.175640e+01	-4.560804e+00
1.400000e+02	1.428468e+03	-2.396287e+02	-3.581840e+02	-2.004729e+02	-2.480493e+02	2.775969e+02	2.250707e+02	-6.584351e+01	-5.562044e+01	3.028502e+00	-2.122803e+01	1.325170e+01	-4.018285e+01	-5.703208e+00	-1.137742e+01	-1.437256e+02	-1.247829e+01	-1.647216e+01
1.410000e+02	1.505121e+03	-2.872252e+02	-3.992974e+02	-2.184659e+02	-2.905568e+02	2.940153e+02	2.292670e+02	-7.397117e+01	-6.253674e+01	-6.184415e+00	-2.562649e+01	5.250149e+00	-3.978271e+01	-8.906180e+00	-1.726242e+01	-1.798713e+02	-1.398152e+01	-3.027513e+01
1.420000e+02	1.583748e+03	-3.309243e+02	-4.295734e+02	-2.307699e+02	-3.271319e+02	3.002261e+02	2.268100e+02	-8.084578e+01	-6.632425e+01	-1.666630e+01	-2.897065e+01	-2.144612e+00	-4.135501e+01	-1.452912e+01	-2.514451e+01	-2.124216e+02	-1.603718e+01	-4.392514e+01
1.430000e+02	1.659869e+03	-3.710365e+02	-4.481117e+02	-2.410994e+02	-3.558804e+02	2.924490e+02	2.153113e+02	-8.566155e+01	-6.619975e+01	-2.742036e+01	-3.114788e+01	-7.958379e+00	-4.603816e+01	-2.284885e+01	-3.536003e+01	-2.392455e+02	-1.816052e+01	-5.484786e+01
1.440000e+02	1.728063e+03	-4.081260e+02	-4.560191e+02	-2.548854e+02	-3.756596e+02	2.687486e+02	1.932389e+02	-8.757031e+01	-6.166047e+01	-3.764473e+01	-3.225619e+01	-1.173468e+01	-5.473635e+01	-3.421506e+01	-4.830507e+01	-2.595221e+02	-1.977436e+01	-6.051779e+01
1.450000e+02	1.782551e+03	-4.422792e+02	-4.557916e+02	-2.778667e+02	-3.861978e+02	2.296415e+02	1.603353e+02	-8.585924e+01	-5.263803e+01	-4.679606e+01	-3.254628e+01	-1.357462e+01	-6.787485e+01	-4.890343e+01	-6.421107e+01	-2.737804e+02	-2.040202e+01	-5.912265e+01
1.460000e+02	1.818186e+03	-4.722390e+02	-4.502851e+02	-3.141863e+02	-3.878735e+02	1.782666e+02	1.179995e+02	-8.014742e+01	-3.961995e+01	-5.452380e+01	-3.232581e+01	-1.399607e+01	-8.512946e+01	-6.679997e+01	-8.280873e+01	-2.834102e+02	-1.980948e+01	-5.010215e+01
1.470000e+02	1.831515e+03	-4.948926e+02	-4.416830e+02	-3.646065e+02	-3.812631e+02	1.200156e+02	6.947613e+01	-7.054330e+01	-2.368908e+01	-6.053997e+01	-3.185093e+01	-1.368547e+01	-1.052301e+02	-8.706485e+01	-1.030369e+02	-2.898564e+02	-1.804491e+01	-3.437214e+01
1.480000e+02	1.821515e+03	-5.055717e+02	-4.308882e+02	-4.255430e+02	-3.667117e+02	6.164880e+01	1.967577e+01	-5.770765e+01	-6.441416e+00	-6.451248e+01	-3.123497e+01	-1.324595e+01	-1.259633e+02	-1.079746e+02	-1.229683e+02	-2.938495e+02	-1.537646e+01	-1.415012e+01
1.490000e+02	1.789760e+03	-4.993023e+02	-4.175877e+02	-4.894115e+02	-3.442138e+02	1.007125e+01	-2.547436e+01	-4.279425e+01	1.022415e+01	-6.604910e+01	-3.040255e+01	-1.303040e+01	-1.444570e+02	-1.270851e+02	-1.400500e+02	-2.950279e+02	-1.217655e+01	7.557650e+00
1.500000e+02	1.740031e+03	-4.726717e+02	-4.009432e+02	-5.463304e+02	-3.137437e+02	-2.893092e+01	-6.008902e+01	-2.728097e+01	2.440655e+01	-6.478707e+01	-2.910635e+01	-1.309926e+01	-1.577238e+02	-1.417169e+02	-1.516253e+02	-2.921404e+02	-8.816290e+00	2.762976e+01
1.510000e+02	1.677588e+03	-4.255735e+02	-3.805610e+02	-5.866973e+02	-2.759174e+02	-5.166499e+01	-7.954938e+01	-1.273846e+01	3.452105e+01	-6.054604e+01	-2.700390e+01	-1.328627e+01	-1.633255e+02	-1.496081e+02	-1.555769e+02	-2.837581e+02	-5.612089e+00	4.345038e+01
1.520000e+02	1.608389e+03	-3.620165e+02	-3.572474e+02	-6.037936e+02	-2.326313e+02	-5.697867e+01	-8.153746e+01	-5.972164e-01	3.955510e+01	-5.347033e+01	-2.376965e+01	-1.331780e+01	-1.599511e+02	-1.494993e+02	-1.508783e+02	-2.691716e+02	-2.824607e+00	5.331804e+01
1.530000e+02	1.538446e+03	-2.895053e+02	-3.331385e+02	-5.955359e+02	-1.872603e+02	-4.612049e+01	-6.655002e+01	8.038513e+00	3.920402e+01	-4.409164e+01	-1.920332e+01	-1.292595e+01	-1.477187e+02	-1.414415e+02	-1.378705e+02	-2.490501e+02	-6.751709e-01	5.659017e+01
1.540000e+02	1.473342e+03	-2.171029e+02	-3.110813e+02	-5.648091e+02	-1.441785e+02	-2.214260e+01	-3.772801e+01	1.250821e+01	3.387064e+01	-3.328101e+01	-1.329684e+01	-1.191844e+01	-1.281124e+02	-1.267341e+02	-1.181920e+02	-2.255405e+02	6.624123e-01	5.361016e+01
1.550000e+02	1.417799e+03	-1.528646e+02	-2.935048e+02	-5.183364e+02	-1.076982e+02	1.091032e+01	-7.251072e-02	1.264774e+01	2.455290e+01	-2.210629e+01	-6.240346e+00	-1.020103e+01	-1.035890e+02	-1.075497e+02	-9.440626e+01	-2.017410e+02	1.114777e+00	4.551035e+01
1.560000e+02	1.375185e+03	-1.015976e+02	-2.812770e+02	-4.645385e+02	-8.083326e+01	4.878186e+01	4.069055e+01	8.791659e+00	1.266458e+01	-1.164443e+01	1.626964e+00	-7.771420e+00	-7.699890e+01	-8.639732e+01	-6.946083e+01	-1.807663e+02	7.907433e-01	3.397353e+01
1.570000e+02	1.346963e+03	-6.373529e+01	-2.730806e+02	-4.111302e+02	-6.439721e+01	8.759983e+01	7.926958e+01	1.733528e+00	-1.675705e-01	-2.806196e+00	9.893518e+00	-4.707217e+00	-5.100215e+01	-6.560291e+01	-4.613480e+01	-1.647834e+02	4.779023e-02	2.099416e+01
1.580000e+02	1.332259e+03	-3.563581e+01	-2.656280e+02	-3.632093e+02	-5.679335e+01	1.242444e+02	1.117279e+02	-7.360386e+00	-1.230209e+01	3.783896e+00	1.814377e+01	-1.157728e+00	-2.763376e+01	-4.693527e+01	-2.660344e+01	-1.543818e+02	-5.060993e-01	8.645115e+00
1.590000e+02	1.327860e+03	-1.108018e+01	-2.546864e+02	-3.223720e+02	-5.454001e+01	1.565130e+02	1.360265e+02	-1.709413e+01	-2.226324e+01	7.833343e+00	2.598988e+01	2.664313e+00	-8.105541e+00	-3.143113e+01	-1.219235e+01	-1.484729e+02	-1.045160e-01	-1.154168e+00
1.600000e+02	1.328897e+03	1.660648e+01	-2.365402e+02	-2.870291e+02	-5.328369e+01	1.831146e+02	1.521476e+02	-2.604092e+01	-2.889569e+01	9.354576e+00	3.305762e+01	6.499888e+00	7.151676e+00	-1.940606e+01	-3.335740e+00	-1.447063e+02	1.998459e+00	-6.859747e+00
1.610000e+02	1.330201e+03	5.247033e+01	-2.093454e+02	-2.537361e+02	-4.892706e+01	2.035031e+02	1.618006e+02	-3.297224e+01	-3.148179e+01	8.581227e+00	3.894103e+01	1.007178e+01	1.826692e+01	-1.060233e+01	2.899660e-01	-1.402339e+02	6.307840e+00	-7.489669e+00
1.620000e+02	1.328025e+03	9.842068e+01	-1.738835e+02	-2.190573e+02	-3.856054e+01	2.175777e+02	1.677434e+02	-3.706730e+01	-2.980596e+01	5.854247e+00	4.316044e+01	1.311568e+01	2.562931e+01	-4.415443e+00	-4.851975e-01	-1.325901e+02	1.289659e+01	-2.740717e+00
1.630000e+02	1.321493e+03	1.526381e+02	-1.334694e+02	-1.813394e+02	-2.103953e+01	2.253327e+02	1.728357e+02	-3.804404e+01	-2.415333e+01	1.511669e+00	4.516365e+01	1.540249e+01	2.961621e+01	-1.449241e-01	-4.622273e+00	-1.204618e+02	2.131587e+01	6.992761e+00
1.640000e+02	1.313195e+03	2.100268e+02	-9.308984e+01	-1.418028e+02	2.824901e+00	2.266210e+02	1.790705e+02	-3.616956e+01	-1.524096e+01	-4.184153e+00	4.439608e+01	1.674456e+01	3.043200e+01	2.780509e+00	-1.114397e+01	-1.041635e+02	3.065201e+01	2.070885e+01
1.650000e+02	1.308616e+03	2.636145e+02	-5.810425e+01	-1.045850e+02	3.045097e+01	2.211923e+02	1.869285e+02	-3.214333e+01	-4.094962e+00	-1.106052e+01	4.043328e+01	1.698795e+01	2.809368e+01	4.648396e+00	-1.931788e+01	-8.568850e+01	3.972708e+01	3.698474e+01
1.660000e+02	1.314580e+03	3.065543e+02	-3.293291e+01	-7.572332e+01	5.803452e+01	2.090561e+02	1.953471e+02	-2.688861e+01	8.103306e+00	-1.899129e+01	3.313378e+01	1.600073e+01	2.254678e+01	5.413782e+00	-2.871760e+01	-6.829156e+01	4.738706e+01	5.422482e+01
1.670000e+02	1.337299e+03	3.341549e+02	-2.009216e+01	-6.143477e+01	8.141416e+01	1.910172e+02	2.023528e+02	-2.131591e+01	2.017606e+01	-2.782124e+01	2.275187e+01	1.367083e+01	1.385213e+01	4.771145e+00	-3.916062e+01	-5.568079e+01	5.278638e+01	7.091903e+01
1.680000e+02	1.380740e+03	3.452854e+02	-1.976389e+01	-6.629303e+01	9.710480e+01	1.690718e+02	2.060854e+02	-1.612783e+01	3.109139e+01	-3.729180e+01	9.962278e+00	9.927525e+00	2.366068e+00	2.331378e+00	-5.055510e+01	-5.102571e+01	5.557659e+01	8.585673e+01
1.690000e+02	1.445815e+03	3.426499e+02	-2.991030e+01	-9.190978e+01	1.032302e+02	1.463477e+02	2.057209e+02	-1.171532e+01	4.007431e+01	-4.699432e+01	-4.213389e+00	4.795403e+00	-1.115425e+01	-2.145382e+00	-6.271177e+01	-5.607612e+01	5.594053e+01	9.825411e+01
1.700000e+02	1.530502e+03	3.318038e+02	-4.682689e+01	-1.365087e+02	1.000374e+02	1.264712e+02	2.018377e+02	-8.160533e+00	4.667678e+01	-5.636079e+01	-1.854731e+01	-1.523390e+00	-2.555913e+01	-8.535121e+00	-7.518578e+01	-7.067098e+01	5.446825e+01	1.077758e+02
1.710000e+02	1.630603e+03	3.192314e+02	-6.598364e+01	-1.954389e+02	8.976498e+01	1.125383e+02	1.960638e+02	-5.325949e+00	5.080015e+01	-6.469147e+01	-3.176413e+01	-8.565297e+00	-3.943044e+01	-1.623150e+01	-8.720417e+01	-9.279348e+01	5.192510e+01	1.144579e+02
1.720000e+02	1.740668e+03	3.101296e+02	-8.300221e+01	-2.623682e+02	7.584882e+01	1.060975e+02	1.902141e+02	-2.985736e+00	5.266582e+01	-7.122003e+01	-4.268273e+01	-1.556841e+01	-5.129292e+01	-2.417848e+01	-9.771000e+01	-1.191464e+02	4.899590e+01	1.185599e+02
1.730000e+02	1.854689e+03	3.066261e+02	-9.460961e+01	-3.307364e+02	6.169800e+01	1.065749e+02	1.853698e+02	-9.528688e-01	5.273420e+01	-7.522223e+01	-5.033854e+01	-2.153512e+01	-5.986608e+01	-3.106253e+01	-1.055214e+02	-1.460580e+02	4.609267e+01	1.203880e+02
1.740000e+02	1.966422e+03	3.069916e+02	-9.937796e+01	-3.950494e+02	4.945325e+01	1.113838e+02	1.813330e+02	8.293849e-01	5.157924e+01	-7.616857e+01	-5.410543e+01	-2.541868e+01	-6.430604e+01	-3.561915e+01	-1.095718e+02	-1.704409e+02	4.328660e+01	1.201361e+02
1.750000e+02	2.069480e+03	3.060858e+02	-9.803695e+01	-4.517050e+02	3.917773e+01	1.166698e+02	1.766487e+02	2.239823e+00	4.973622e+01	-7.389815e+01	-5.382696e+01	-2.640172e+01	-6.439189e+01	-3.696650e+01	-1.091757e+02	-1.905311e+02	4.037737e+01	1.177908e+02
1.760000e+02	2.157475e+03	2.969137e+02	-9.319300e+01	-4.991827e+02	2.880413e+01	1.184071e+02	1.690992e+02	2.967614e+00	4.755222e+01	-6.876081e+01	-4.993012e+01	-2.417617e+01	-6.062014e+01	-3.486605e+01	-1.042541e+02	-2.062039e+02	3.706259e+01	1.131341e+02
1.770000e+02	2.224496e+03	2.728560e+02	-8.844586e+01	-5.375905e+02	1.490735e+01	1.134780e+02	1.564015e+02	2.528601e+00	4.507737e+01	-6.165865e+01	-4.346002e+01	-1.910982e+01	-5.417961e+01	-2.982927e+01	-9.545588e+01	-2.187800e+02	3.313423e+01	1.058515e+02
1.780000e+02	2.265959e+03	2.299295e+02	-8.712591e+01	-5.677410e+02	-5.932924e+00	1.004362e+02	1.368460e+02	3.147353e-01	4.203490e+01	-5.393585e+01	-3.597140e+01	-1.221561e+01	-4.678938e+01	-2.303346e+01	-8.412826e+01	-2.303700e+02	2.862338e+01	9.572315e+01
1.790000e+02	2.279636e+03	1.683962e+02	-9.107434e+01	-5.900932e+02	-3.566068e+01	7.980834e+01	1.097458e+02	-4.306109e+00	3.789342e+01	-4.711678e+01	-2.925592e+01	-4.917152e+00	-4.040224e+01	-1.606334e+01	-7.211581e+01	-2.429521e+02	2.384079e+01	8.284111e+01
1.800000e+02	2.266444e+03	9.321051e+01	-9.992791e+01	-6.039911e+02	-7.371815e+01	5.393812e+01	7.569017e+01	-1.182780e+01	3.203710e+01	-4.255479e+01	-2.495483e+01	1.310230e+00	-3.680933e+01	-1.054414e+01	-6.141035e+01	-2.574823e+02	1.930610e+01	6.777760e+01
1.810000e+02	2.230567e+03	1.314816e+01	-1.111974e+02	-6.075478e+02	-1.168680e+02	2.648159e+01	3.663491e+01	-2.239706e+01	2.399538e+01	-4.109880e+01	-2.416723e+01	5.293770e+00	-3.722431e+01	-7.763173e+00	-5.372391e+01	-2.733577e+02	1.560242e+01	5.163344e+01
1.820000e+02	2.178682e+03	-6.111666e+01	-1.211105e+02	-5.982644e+02	-1.599284e+02	1.691762e+00	-4.182895e+00	-3.561393e+01	1.366836e+01	-4.288654e+01	-2.718064e+01	6.395878e+00	-4.195829e+01	-8.381614e+00	-5.009555e+01	-2.884451e+02	1.321630e+01	3.592909e+01
1.830000e+02	2.118377e+03	-1.193872e+02	-1.258802e+02	-5.741420e+02	-1.971154e+02	-1.637524e+01	-4.257759e+01	-5.042503e+01	1.477398e+00	-4.733025e+01	-3.341250e+01	4.572323e+00	-5.029478e+01	-1.230977e+01	-5.065015e+01	-2.996756e+02	1.241899e+01	2.235177e+01
1.840000e+02	2.056234e+03	-1.540707e+02	-1.229112e+02	-5.348016e+02	-2.234606e+02	-2.462142e+01	-7.404679e+01	-6.518548e+01	-1.161227e+01	-5.329086e+01	-4.157628e+01	2.824894e-01	-6.062542e+01	-1.876646e+01	-5.458834e+01	-3.039875e+02	1.322018e+01	1.242537e+01
1.850000e+02	1.996199e+03	-1.614951e+02	-1.115235e+02	-4.821302e+02	-2.357996e+02	-2.152782e+01	-9.464409e+01	-7.791551e+01	-2.421409e+01	-5.937250e+01	-5.000976e+01	-5.670955e+00	-7.082329e+01	-2.648427e+01	-6.041195e+01	-2.992679e+02	1.539548e+01	7.200012e+00
1.860000e+02	1.938855e+03	-1.421671e+02	-9.300239e+01	-4.202000e+02	-2.330832e+02	-7.514068e+00	-1.018860e+02	-8.670366e+01	-3.476277e+01	-6.423756e+01	-5.705842e+01	-1.229657e+01	-7.874738e+01	-3.398531e+01	-6.630938e+01	-2.849770e+02	1.856549e+01	7.052446e+00
1.870000e+02	1.881930e+03	-1.000636e+02	-7.004900e+01	-3.545398e+02	-2.160897e+02	1.508475e+01	-9.539982e+01	-9.014266e+01	-4.181721e+01	-6.685524e+01	-6.140740e+01	-1.852970e+01	-8.273003e+01	-3.985212e+01	-7.057718e+01	-2.623005e+02	2.229482e+01	1.164508e+01
1.880000e+02	1.821953e+03	-4.131187e+01	-4.589482e+01	-2.910810e+02	-1.868498e+02	4.249343e+01	-7.706194e+01	-8.766076e+01	-4.434800e+01	-6.664035e+01	-6.229362e+01	-2.332752e+01	-8.191524e+01	-4.294894e+01	-7.195828e+01	-2.338718e+02	2.617934e+01	2.003046e+01
1.890000e+02	1.756561e+03	2.727314e+01	-2.340239e+01	-2.351433e+02	-1.481331e+02	7.037562e+01	-5.054078e+01	-7.964298e+01	-4.193979e+01	-6.348873e+01	-5.958003e+01	-2.578549e+01	-7.637950e+01	-4.258479e+01	-6.982631e+01	-2.032341e+02	2.989676e+01	3.083829e+01
1.900000e+02	1.686672e+03	9.936374e+01	-4.418330e+00	-1.906879e+02	-1.031970e+02	9.491665e+01	-2.036802e+01	-6.731018e+01	-3.486380e+01	-5.774447e+01	-5.371442e+01	-2.529807e+01	-6.704035e+01	-3.862385e+01	-6.420913e+01	-1.742244e+02	3.320565e+01	4.246747e+01
1.910000e+02	1.617713e+03	1.697516e+02	1.048035e+01	-1.598828e+02	-5.579350e+01	1.137978e+02	9.182515e+00	-5.240531e+01	-2.401073e+01	-5.013351e+01	-4.561194e+01	-2.173895e+01	-5.541087e+01	-3.153775e+01	-5.569187e+01	-1.503863e+02	3.589391e+01	5.323230e+01
1.920000e+02	1.559363e+03	2.344348e+02	2.184470e+01	-1.429256e+02	-1.025233e+01	1.267466e+02	3.508660e+01	-3.679240e+01	-1.070944e+01	-4.167655e+01	-3.649630e+01	-1.559363e+01	-4.327648e+01	-2.237370e+01	-4.525446e+01	-1.344402e+02	3.769833e+01	6.146339e+01
1.930000e+02	1.523747e+03	2.903963e+02	3.093108e+01	-1.380891e+02	2.860030e+01	1.354751e+02	5.617797e+01	-2.208650e+01	3.517251e+00	-3.357131e+01	-2.772115e+01	-7.967626e+00	-3.236423e+01	-1.261060e+01	-3.408881e+01	-1.278233e+02	3.823754e+01	6.560877e+01
1.940000e+02	1.522586e+03	3.354215e+02	3.917711e+01	-1.420309e+02	5.587461e+01	1.430338e+02	7.324873e+01	-9.405280e+00	1.719751e+01	-2.702976e+01	-2.058348e+01	-4.270710e-01	-2.405964e+01	-3.903135e+00	-2.342361e+01	-1.303575e+02	3.700797e+01	6.439142e+01
1.950000e+02	1.564126e+03	3.682247e+02	4.776111e+01	-1.504257e+02	6.744468e+01	1.528132e+02	8.865430e+01	7.159105e-01	2.910136e+01	-2.307332e+01	-1.614184e+01	5.312007e+00	-1.921382e+01	2.240127e+00	-1.437508e+01	-1.401604e+02	3.347498e+01	5.704716e+01
1.960000e+02	1.650759e+03	3.889046e+02	5.737667e+01	-1.588713e+02	6.102159e+01	1.675360e+02	1.055477e+02	8.254873e+00	3.834637e+01	-2.231992e+01	-1.506050e+01	7.771425e+00	-1.806974e+01	4.762281e+00	-7.839771e+00	-1.539043e+02	2.724898e+01	4.360381e+01
1.970000e+02	1.777942e+03	3.994809e+02	6.826277e+01	-1.638514e+02	3.714988e+01	1.885566e+02	1.269494e+02	1.352734e+01	4.441887e+01	-2.482114e+01	-1.750723e+01	6.070219e+00	-2.031385e+01	3.263704e+00	-4.439921e+00	-1.674307e+02	1.828711e+01	2.510302e+01
1.980000e+02	1.934590e+03	4.041282e+02	8.043110e+01	-1.634140e+02	-2.732421e-01	2.156461e+02	1.549045e+02	1.697516e+01	4.713998e+01	-3.000755e+01	-2.312817e+01	1.570896e-01	-2.522498e+01	-1.939611e+00	-4.512625e+00	-1.765803e+02	7.033395e+00	3.642067e+00
1.990000e+02	2.104726e+03	4.088078e+02	9.395741e+01	-1.572747e+02	-4.427378e+01	2.472682e+02	1.899674e+02	1.898948e+01	4.661823e+01	-3.677335e+01	-3.110563e+01	-9.144784e+00	-3.185863e+01	-9.897674e+00	-8.109434e+00	-1.779894e+02	-5.575141e+00	-1.785406e+01
2.000000e+02	2.269916e+03	4.202364e+02	1.091750e+02	-1.462850e+02	-8.594721e+01	2.811928e+02	2.311681e+02	1.982324e+01	4.322157e+01	-4.368803e+01	-4.028334e+01	-2.028989e+01	-3.919296e+01	-1.919939e+01	-1.496336e+01	-1.696100e+02	-1.825333e+01	-3.613505e+01
2.010000e+02	2.411977e+03	4.443941e+02	1.266387e+02	-1.315187e+02	-1.162382e+02	3.152010e+02	2.764441e+02	1.961180e+01	3.757401e+01	-4.928413e+01	-4.932977e+01	-3.132209e+01	-4.618937e+01	-2.818157e+01	-2.440686e+01	-1.508331e+02	-2.961504e+01	-4.830037e+01
2.020000e+02	2.515503e+03	4.849218e+02	1.468162e+02	-1.134471e+02	-1.278783e+02	3.476121e+02	3.233314e+02	1.847542e+01	3.055133e+01	-5.235234e+01	-5.691183e+01	-4.027658e+01	-5.178041e+01	-3.514504e+01	-3.528230e+01	-1.222792e+02	-3.843435e+01	-5.246307e+01
2.030000e+02	2.569812e+03	5.418024e+02	1.695937e+02	-9.165643e+01	-1.169502e+02	3.774217e+02	3.695825e+02	1.664027e+01	2.323299e+01	-5.217906e+01	-6.186281e+01	-4.558648e+01	-5.485755e+01	-3.858109e+01	-4.593950e+01	-8.545111e+01	-4.384014e+01	-4.819967e+01
2.040000e+02	2.570080e+03	6.106927e+02	1.938074e+02	-6.529476e+01	-8.369052e+01	4.039947e+02	4.134162e+02	1.450387e+01	1.677721e+01	-4.867871e+01	-6.333621e+01	-4.640549e+01	-5.435046e+01	-3.741961e+01	-5.441667e+01	-4.246267e+01	-4.540936e+01	-3.664240e+01
2.050000e+02	2.517542e+03	6.832157e+02	2.170655e+02	-3.403524e+01	-3.238454e+01	4.264686e+02	4.533123e+02	1.259716e+01	1.222150e+01	-4.239329e+01	-6.093260e+01	-4.276904e+01	-4.944388e+01	-3.128019e+01	-5.882906e+01	4.060251e+00	-4.317390e+01	-2.018595e+01
2.060000e+02	2.418880e+03	7.483877e+02	2.360579e+02	9.613578e-01	2.955503e+01	4.432161e+02	4.875480e+02	1.144781e+01	1.025457e+01	-3.435346e+01	-5.477291e+01	-3.554678e+01	-3.988576e+01	-2.065950e+01	-5.787253e+01	5.096850e+01	-3.758151e+01	-1.905472e+00
2.070000e+02	2.285012e+03	7.950750e+02	2.473572e+02	3.665089e+01	9.308250e+01	4.517738e+02	5.138811e+02	1.140178e+01	1.103450e+01	-2.582195e+01	-4.548458e+01	-2.618929e+01	-2.625292e+01	-6.957502e+00	-5.125338e+01	9.464780e+01	-2.944116e+01	1.513265e+01
2.080000e+02	2.129626e+03	8.149650e+02	2.484821e+02	6.858718e+01	1.492689e+02	4.494834e+02	5.297498e+02	1.248337e+01	1.412346e+01	-1.797278e+01	-3.408109e+01	-1.633272e+01	-1.001591e+01	7.732581e+00	-3.984580e+01	1.313143e+02	-1.985682e+01	2.847087e+01
2.090000e+02	1.967685e+03	8.051783e+02	2.388340e+02	9.216068e+01	1.909620e+02	4.347452e+02	5.330882e+02	1.435729e+01	1.857241e+01	-1.158911e+01	-2.175017e+01	-7.374008e+00	6.691745e+00	2.106802e+01	-2.547288e+01	1.575810e+02	-1.013234e+01	3.662716e+01
2.100000e+02	1.814072e+03	7.695587e+02	2.201306e+02	1.040916e+02	2.140220e+02	4.084033e+02	5.234541e+02	1.641103e+01	2.313731e+01	-6.871679e+00	-9.605684e+00	-1.454009e-01	2.156600e+01	3.102640e+01	-1.036769e+01	1.711465e+02	-1.630327e+00	3.917601e+01
2.110000e+02	1.682359e+03	7.180238e+02	1.961497e+02	1.035376e+02	2.178677e+02	3.745822e+02	5.028840e+02	1.792752e+01	2.656739e+01	-3.427312e+00	1.521087e+00	5.212555e+00	3.272219e+01	3.641377e+01	3.482842e+00	1.713396e+02	4.414701e+00	3.658539e+01
2.120000e+02	1.583647e+03	6.640373e+02	1.718715e+02	9.235285e+01	2.052278e+02	3.404161e+02	4.759042e+02	1.829070e+01	2.789034e+01	-4.529423e-01	1.118714e+01	9.146694e+00	3.915561e+01	3.711529e+01	1.484979e+01	1.592756e+02	7.106314e+00	2.991587e+01
2.130000e+02	1.525414e+03	6.209843e+02	1.523233e+02	7.442588e+01	1.812047e+02	3.145408e+02	4.484855e+02	1.716358e+01	2.662889e+01	2.937961e+00	1.931753e+01	1.240326e+01	4.088918e+01	3.397505e+01	2.342955e+01	1.375441e+02	6.079214e+00	2.050561e+01
2.140000e+02	1.510430e+03	5.986363e+02	1.414890e+02	5.442736e+01	1.519515e+02	3.047646e+02	4.262432e+02	1.459271e+01	2.290427e+01	7.355944e+00	2.608499e+01	1.566748e+01	3.875691e+01	2.833956e+01	2.962046e+01	1.095565e+02	1.627251e+00	9.735457e+00
2.150000e+02	1.535950e+03	6.007988e+02	1.415411e+02	3.650142e+01	1.233412e+02	3.157298e+02	4.125990e+02	1.101080e+01	1.740324e+01	1.287060e+01	3.174646e+01	1.926302e+01	3.393059e+01	2.144733e+01	3.403643e+01	7.881921e+01	-5.279671e+00	-1.091306e+00
2.160000e+02	1.593597e+03	6.247122e+02	1.524767e+02	2.335872e+01	9.993570e+01	3.474228e+02	4.076758e+02	7.129903e+00	1.120743e+01	1.893497e+01	3.649465e+01	2.301248e+01	2.740249e+01	1.392051e+01	3.699619e+01	4.838380e+01	-1.311975e+01	-1.078234e+01
2.170000e+02	1.670338e+03	6.621367e+02	1.721123e+02	1.594385e+01	8.439695e+01	3.950634e+02	4.083864e+02	3.744279e+00	5.513692e+00	2.452084e+01	4.035840e+01	2.629023e+01	1.963921e+01	5.571259e+00	3.822254e+01	2.058028e+01	-2.008006e+01	-1.826449e+01
2.180000e+02	1.750764e+03	7.015839e+02	1.963699e+02	1.354844e+01	7.732018e+01	4.503656e+02	4.096373e+02	1.495685e+00	1.314134e+00	2.840386e+01	4.315730e+01	2.822231e+01	1.052594e+01	-4.408836e+00	3.687308e+01	-3.034317e+00	-2.440194e+01	-2.261936e+01
2.190000e+02	1.820383e+03	7.310214e+02	2.198442e+02	1.410483e+01	7.740447e+01	5.036699e+02	4.061111e+02	6.812221e-01	-8.629450e-01	2.948424e+01	4.450080e+01	2.794009e+01	-4.189011e-01	-1.697941e+01	3.186323e+01	-2.166860e+01	-2.471704e+01	-2.315554e+01
2.200000e+02	1.869106e+03	7.404766e+02	2.366722e+02	1.448044e+01	8.189698e+01	5.462034e+02	3.939152e+02	1.182699e+00	-1.050810e+00	2.702904e+01	4.382570e+01	2.479558e+01	-1.368972e+01	-3.271966e+01	2.231537e+01	-3.534009e+01	-2.027238e+01	-1.948156e+01
2.210000e+02	1.893730e+03	7.241332e+02	2.416607e+02	1.079815e+01	8.729076e+01	5.718064e+02	3.715528e+02	2.554372e+00	2.669808e-01	2.077255e+01	4.047426e+01	1.848522e+01	-2.946804e+01	-5.145693e+01	7.932242e+00	-4.494154e+01	-1.098320e+01	-1.153155e+01
2.220000e+02	1.898462e+03	6.815993e+02	2.314749e+02	-1.050942e+00	9.023013e+01	5.777579e+02	3.400429e+02	4.235455e+00	2.434629e+00	1.088056e+01	3.381438e+01	9.079811e+00	-4.745003e+01	-7.218449e+01	-1.084581e+01	-5.218468e+01	2.671715e+00	4.730527e-01
2.230000e+02	1.893137e+03	6.180573e+02	2.055451e+02	-2.458759e+01	8.846471e+01	5.646945e+02	3.023749e+02	5.791226e+00	4.943695e+00	-2.162503e+00	2.338719e+01	-3.009941e+00	-6.686629e+01	-9.326334e+01	-3.292519e+01	-5.927188e+01	1.982768e+01	1.609095e+01
2.240000e+02	1.889739e+03	5.431102e+02	1.663378e+02	-6.172751e+01	8.156366e+01	5.358650e+02	2.626592e+02	7.069774e+00	7.643112e+00	-1.767108e+01	9.049870e+00	-1.709765e+01	-8.664925e+01	-1.127967e+02	-5.680521e+01	-6.827558e+01	3.938036e+01	3.469335e+01
2.250000e+02	1.898488e+03	4.684228e+02	1.188086e+02	-1.119174e+02	7.107626e+01	4.960577e+02	2.252837e+02	8.203960e+00	1.074134e+01	-3.483140e+01	-8.921401e+00	-3.229393e+01	-1.056577e+02	-1.290302e+02	-8.085993e+01	-8.039548e+01	6.004137e+01	5.541917e+01
2.260000e+02	1.924842e+03	4.046846e+02	6.915686e+01	-1.718410e+02	5.997889e+01	4.504981e+02	1.942198e+02	9.468479e+00	1.460943e+01	-5.272136e+01	-2.978770e+01	-4.758033e+01	-1.228683e+02	-1.406610e+02	-1.035518e+02	-9.539462e+01	8.032665e+01	7.707676e+01
2.270000e+02	1.968295e+03	3.587869e+02	2.328684e+01	-2.359280e+02	5.154270e+01	4.039147e+02	1.724670e+02	1.107619e+01	1.949720e+01	-7.030541e+01	-5.236069e+01	-6.188434e+01	-1.374809e+02	-1.470047e+02	-1.235397e+02	-1.114937e+02	9.856594e+01	9.808204e+01
2.280000e+02	2.023038e+03	3.321618e+02	-1.450469e+01	-2.975478e+02	4.804473e+01	3.598878e+02	1.616052e+02	1.302650e+01	2.531785e+01	-8.644823e+01	-7.506404e+01	-7.415684e+01	-1.489307e+02	-1.480236e+02	-1.397107e+02	-1.258238e+02	1.130247e+02	1.165408e+02
2.290000e+02	2.079885e+03	3.208660e+02	-4.221528e+01	-3.504664e+02	4.985451e+01	3.205364e+02	1.614932e+02	1.508735e+01	3.161620e+01	-9.998365e+01	-9.604673e+01	-8.345479e+01	-1.568400e+02	-1.442482e+02	-1.511966e+02	-1.352920e+02	1.221663e+02	1.305306e+02
2.300000e+02	2.128621e+03	3.173133e+02	-6.009315e+01	-3.900620e+02	5.527482e+01	2.865514e+02	1.702412e+02	1.691884e+01	3.773486e+01	-1.098488e+02	-1.133679e+02	-8.903281e+01	-1.609615e+02	-1.366265e+02	-1.574228e+02	-1.375390e+02	1.249929e+02	1.385361e+02
2.310000e+02	2.160114e+03	3.129018e+02	-7.006386e+01	-4.139800e+02	6.116788e+01	2.575217e+02	1.845563e+02	1.826819e+01	4.308570e+01	-1.152599e+02	-1.252663e+02	-9.044244e+01	-1.611589e+02	-1.263352e+02	-1.581954e+02	-1.316570e+02	1.213383e+02	1.398951e+02
2.320000e+02	2.167859e+03	3.004744e+02	-7.498157e+01	-4.222144e+02	6.404314e+01	2.324276e+02	2.004267e+02	1.912305e+01	4.737742e+01	-1.158778e+02	-1.304867e+02	-8.762349e+01	-1.574519e+02	-1.145888e+02	-1.537905e+02	-1.184708e+02	1.119917e+02	1.350740e+02
2.330000e+02	2.148931e+03	2.757588e+02	-7.799787e+01	-4.168255e+02	6.111407e+01	2.101271e+02	2.139350e+02	1.972714e+01	5.067422e+01	-1.119034e+02	-1.285821e+02	-8.095646e+01	-1.501195e+02	-1.024940e+02	-1.449919e+02	-1.003811e+02	9.858997e+01	1.256405e+02
2.340000e+02	2.104338e+03	2.375260e+02	-8.214021e+01	-4.015108e+02	5.092567e+01	1.896771e+02	2.219174e+02	2.043396e+01	5.325372e+01	-1.040605e+02	-1.200784e+02	-7.124084e+01	-1.398185e+02	-9.098099e+01	-1.330398e+02	-8.088644e+01	8.330687e+01	1.139116e+02
2.350000e+02	2.038754e+03	1.868371e+02	-9.000613e+01	-3.810935e+02	3.343295e+01	1.704253e+02	2.222774e+02	2.146609e+01	5.534446e+01	-9.346041e+01	-1.064161e+02	-5.958215e+01	-1.276524e+02	-8.081850e+01	-1.194854e+02	-6.392746e+01	6.843218e+01	1.023887e+02
2.360000e+02	1.959577e+03	1.260909e+02	-1.034342e+02	-3.608411e+02	9.694765e+00	1.519289e+02	2.139688e+02	2.270886e+01	5.689360e+01	-8.139045e+01	-8.965667e+01	-4.720582e+01	-1.151225e+02	-7.267176e+01	-1.059826e+02	-5.315137e+01	5.595956e+01	9.316904e+01
2.370000e+02	1.875415e+03	5.847408e+01	-1.231160e+02	-3.455362e+02	-1.852221e+01	1.338437e+02	1.968444e+02	2.366015e+01	5.750186e+01	-6.909043e+01	-7.203741e+01	-3.524883e+01	-1.039285e+02	-6.713993e+01	-9.406335e+01	-5.117707e+01	4.727862e+01	8.752520e+01
2.380000e+02	1.794350e+03	-1.201254e+01	-1.482641e+02	-3.384030e+02	-4.900221e+01	1.159129e+02	1.715963e+02	2.358189e+01	5.657373e+01	-5.758250e+01	-5.551441e+01	-2.459076e+01	-9.564280e+01	-6.471915e+01	-8.494389e+01	-5.897525e+01	4.302116e+01	8.576563e+01
2.390000e+02	1.722442e+03	-8.023839e+01	-1.765229e+02	-3.401941e+02	-7.915921e+01	9.809589e+01	1.398706e+02	2.179413e+01	5.361491e+01	-4.758694e+01	-4.142872e+01	-1.576626e+01	-9.134542e+01	-6.568292e+01	-7.939132e+01	-7.552672e+01	4.306597e+01	8.737474e+01
2.400000e+02	1.662866e+03	-1.398349e+02	-2.042465e+02	-3.488104e+02	-1.060576e+02	8.075840e+01	1.044267e+02	1.797835e+01	4.853258e+01	-3.951688e+01	-3.036958e+01	-8.962762e+00	-9.133507e+01	-6.992816e+01	-7.766138e+01	-9.791010e+01	4.667471e+01	9.133729e+01
2.410000e+02	1.615854e+03	-1.836653e+02	-2.271184e+02	-3.596726e+02	-1.265406e+02	6.479328e+01	6.909435e+01	1.235275e+01	4.179608e+01	-3.351674e+01	-2.222636e+01	-4.073517e+00	-9.502283e+01	-7.686988e+01	-7.950715e+01	-1.218598e+02	5.271635e+01	9.651129e+01
2.420000e+02	1.579317e+03	-2.048962e+02	-2.409510e+02	-3.667778e+02	-1.375519e+02	5.157491e+01	3.834228e+01	5.646523e+00	3.438824e+01	-2.950606e+01	-1.636064e+01	-7.644604e-01	-1.010562e+02	-8.545992e+01	-8.425261e+01	-1.426694e+02	5.993166e+01	1.019336e+02
2.430000e+02	1.549907e+03	-1.983632e+02	-2.424602e+02	-3.641259e+02	-1.366065e+02	4.273806e+01	1.648348e+01	-1.106862e+00	2.757536e+01	-2.720974e+01	-1.181601e+01	1.472369e+00	-1.076437e+02	-9.435516e+01	-9.092036e+01	-1.561860e+02	6.718595e+01	1.069952e+02
2.440000e+02	1.524212e+03	-1.617833e+02	-2.298546e+02	-3.471011e+02	-1.222779e+02	3.985000e+01	6.767160e+00	-6.864538e+00	2.259530e+01	-2.618231e+01	-7.511171e+00	3.277410e+00	-1.129782e+02	-1.021895e+02	-9.839396e+01	-1.596148e+02	7.365758e+01	1.114767e+02
2.450000e+02	1.499860e+03	-9.645298e+01	-2.031572e+02	-3.134767e+02	-9.456617e+01	4.406285e+01	1.069816e+01	-1.084125e+01	2.037947e+01	-2.585198e+01	-2.406464e+00	5.368628e+00	-1.156230e+02	-1.078478e+02	-1.055822e+02	-1.519436e+02	7.891768e+01	1.154686e+02
2.460000e+02	1.476293e+03	-7.273003e+00	-1.642413e+02	-2.638696e+02	-5.506297e+01	5.580578e+01	2.783280e+01	-1.265856e+01	2.139226e+01	-2.560701e+01	4.338227e+00	8.443709e+00	-1.147334e+02	-1.106278e+02	-1.115453e+02	-1.339362e+02	8.288123e+01	1.192141e+02
2.470000e+02	1.455015e+03	9.787702e+01	-1.165814e+02	-2.016171e+02	-6.882132e+00	7.455046e+01	5.608646e+01	-1.234190e+01	2.561371e+01	-2.492392e+01	1.320249e+01	1.303160e+01	-1.100524e+02	-1.102232e+02	-1.155506e+02	-1.077647e+02	8.565014e+01	1.229163e+02
2.480000e+02	1.439172e+03	2.092872e+02	-6.473885e+01	-1.321366e+02	4.566088e+01	9.869427e+01	9.237968e+01	-1.019102e+01	3.263629e+01	-2.350466e+01	2.416404e+01	1.932257e+01	-1.017083e+02	-1.065496e+02	-1.170544e+02	-7.641912e+01	8.731216e+01	1.265560e+02
2.490000e+02	1.432506e+03	3.169015e+02	-1.364399e+01	-6.189003e+01	9.763034e+01	1.256370e+02	1.333492e+02	-6.594029e+00	4.181122e+01	-2.136881e+01	3.663224e+01	2.703638e+01	-8.992935e+01	-9.952507e+01	-1.156410e+02	-4.304928e+01	8.778401e+01	1.297715e+02
2.500000e+02	1.437962e+03	4.118692e+02	3.219550e+01	2.850300e+00	1.442734e+02	1.521237e+02	1.758840e+02	-1.870959e+00	5.237312e+01	-1.885441e+01	4.951057e+01	3.538963e+01	-7.483272e+01	-8.895352e+01	-1.109793e+02	-1.039221e+01	8.677165e+01	1.318427e+02
2.510000e+02	1.456415e+03	4.878063e+02	6.937104e+01	5.714829e+01	1.818927e+02	1.748487e+02	2.173645e+02	3.786311e+00	6.349533e+01	-1.652037e+01	6.139522e+01	4.318863e+01	-5.641214e+01	-7.461857e+01	-1.028516e+02	1.957892e+01	8.386561e+01	1.317929e+02
2.520000e+02	1.485992e+03	5.413851e+02	9.594559e+01	9.814466e+01	2.085156e+02	1.911768e+02	2.556208e+02	1.026035e+01	7.427592e+01	-1.499494e+01	7.084829e+01	4.902064e+01	-3.475063e+01	-5.657811e+01	-9.127439e+01	4.569724e+01	7.871883e+01	1.285829e+02
2.530000e+02	1.522266e+03	5.720340e+02	1.114184e+02	1.251589e+02	2.240624e+02	1.997313e+02	2.887257e+02	1.738327e+01	8.370558e+01	-1.484538e+01	7.663951e+01	5.147697e+01	-1.035959e+01	-3.552195e+01	-7.667270e+01	6.734597e+01	7.120647e+01	1.213377e+02
2.540000e+02	1.559300e+03	5.808574e+02	1.163264e+02	1.391376e+02	2.298679e+02	2.005932e+02	3.147882e+02	2.482431e+01	9.069483e+01	-1.652692e+01	7.786652e+01	4.934367e+01	1.554039e+01	-1.298229e+01	-6.001953e+01	8.403926e+01	6.147592e+01	1.095383e+02
2.550000e+02	1.591171e+03	5.692630e+02	1.116736e+02	1.416960e+02	2.276975e+02	1.950004e+02	3.319003e+02	3.207099e+01	9.421716e+01	-2.040933e+01	7.394048e+01	4.173694e+01	4.097952e+01	8.776139e+00	-4.283984e+01	9.506669e+01	4.985950e+01	9.313581e+01
2.560000e+02	1.613456e+03	5.379818e+02	9.845837e+01	1.341792e+02	2.186859e+02	1.846599e+02	3.383197e+02	3.853447e+01	9.355878e+01	-2.681404e+01	6.451460e+01	2.821040e+01	6.352412e+01	2.722005e+01	-2.701713e+01	9.941775e+01	3.670865e+01	7.258294e+01
2.570000e+02	1.624175e+03	4.870379e+02	7.752045e+01	1.171664e+02	2.027312e+02	1.709718e+02	3.328619e+02	4.373828e+01	8.858876e+01	-3.597213e+01	4.947657e+01	8.878526e+00	8.082385e+01	4.022589e+01	-1.441731e+01	9.607359e+01	2.226333e+01	4.880628e+01
2.580000e+02	1.623925e+03	4.167781e+02	4.978008e+01	9.064184e+01	1.787087e+02	1.545179e+02	3.153635e+02	4.749584e+01	7.992269e+01	-4.786013e+01	2.908467e+01	-1.543307e+01	9.123118e+01	4.671346e+01	-6.428594e+00	8.456278e+01	6.656082e+00	2.314718e+01
2.590000e+02	1.615263e+03	3.295154e+02	1.673577e+01	5.475114e+01	1.454842e+02	1.350440e+02	2.870258e+02	4.998003e+01	6.887850e+01	-6.196438e+01	4.218857e+00	-4.306565e+01	9.426111e+01	4.697656e+01	-3.568704e+00	6.552551e+01	-9.929957e+00	-2.719350e+00
2.600000e+02	1.601712e+03	2.309374e+02	-1.906729e+01	1.077552e+01	1.032814e+02	1.119385e+02	2.504754e+02	5.163858e+01	5.720727e+01	-7.710778e+01	-2.339262e+01	-7.153877e+01	9.071690e+01	4.257065e+01	-5.306371e+00	4.099698e+01	-2.703083e+01	-2.690219e+01
2.610000e+02	1.586833e+03	1.304244e+02	-5.391707e+01	-3.817819e+01	5.472489e+01	8.498252e+01	2.094774e+02	5.298361e+01	4.667836e+01	-9.148362e+01	-5.114903e+01	-9.778850e+01	8.243431e+01	3.579469e+01	-1.017988e+01	1.422321e+01	-4.373998e+01	-4.747063e+01
2.620000e+02	1.573738e+03	3.982395e+01	-8.335750e+01	-8.719142e+01	4.964223e+00	5.503137e+01	1.683564e+02	5.434144e+01	3.865589e+01	-1.029593e+02	-7.586535e+01	-1.186445e+02	7.173422e+01	2.895491e+01	-1.619556e+01	-1.099075e+01	-5.873443e+01	-6.269283e+01
2.630000e+02	1.565099e+03	-2.910683e+01	-1.031131e+02	-1.303866e+02	-3.932891e+01	2.432447e+01	1.312688e+02	5.566112e+01	3.379654e+01	-1.095772e+02	-9.433809e+01	-1.314413e+02	6.076465e+01	2.366119e+01	-2.139189e+01	-3.120881e+01	-7.051635e+01	-7.130054e+01
2.640000e+02	1.563467e+03	-6.776358e+01	-1.102270e+02	-1.623765e+02	-7.177925e+01	-3.719646e+00	1.014972e+02	5.644787e+01	3.193887e+01	-1.100674e+02	-1.040127e+02	-1.345760e+02	5.093352e+01	2.037002e+01	-2.439873e+01	-4.425437e+01	-7.778758e+01	-7.270894e+01
2.650000e+02	1.571530e+03	-7.314258e+01	-1.039789e+02	-1.797633e+02	-8.823688e+01	-2.515872e+01	8.092536e+01	5.583446e+01	3.218129e+01	-1.041679e+02	-1.035188e+02	-1.278206e+02	4.258524e+01	1.828328e+01	-2.482556e+01	-4.974068e+01	-7.981091e+01	-6.711659e+01
2.660000e+02	1.591985e+03	-4.873407e+01	-8.618891e+01	-1.820672e+02	-8.803018e+01	-3.640746e+01	6.979985e+01	5.275954e+01	3.309696e+01	-9.263041e+01	-9.289777e+01	-1.122925e+02	3.498909e+01	1.559413e+01	-2.337193e+01	-4.903271e+01	-7.662547e+01	-5.544595e+01
2.670000e+02	1.626922e+03	-3.504005e+00	-6.073317e+01	-1.716818e+02	-7.404027e+01	-3.505741e+01	6.682039e+01	4.620204e+01	3.302089e+01	-7.693390e+01	-7.348000e+01	-9.011461e+01	2.661705e+01	9.982259e+00	-2.164003e+01	-4.464138e+01	-6.905663e+01	-3.914544e+01
2.680000e+02	1.676875e+03	5.065479e+01	-3.241983e+01	-1.528782e+02	-5.160404e+01	-2.040190e+01	6.951928e+01	3.542069e+01	3.035520e+01	-5.884277e+01	-4.750641e+01	-6.390786e+01	1.562079e+01	-7.808103e-01	-2.171081e+01	-3.928190e+01	-5.854380e+01	-1.992322e+01
2.690000e+02	1.739940e+03	1.020561e+02	-5.640786e+00	-1.303018e+02	-2.674058e+01	6.441436e+00	7.480866e+01	2.015260e+01	2.385074e+01	-3.998700e+01	-1.765335e+01	-3.628850e+01	3.802302e-01	-1.825506e+01	-2.559879e+01	-3.497700e+01	-4.685674e+01	5.066892e-01
2.700000e+02	1.811468e+03	1.418550e+02	1.669815e+01	-1.076077e+02	-4.424577e+00	4.277656e+01	7.952979e+01	7.266336e-01	1.282593e+01	-2.159191e+01	1.339643e+01	-9.492300e+00	-2.000945e+01	-4.289829e+01	-3.471964e+01	-3.256630e+01	-3.577064e+01	2.061638e+01
2.710000e+02	1.884693e+03	1.654387e+02	3.361345e+01	-8.674498e+01	1.249424e+01	8.481347e+01	8.086348e+01	-2.194864e+01	-2.715436e+00	-4.396936e+00	4.326419e+01	1.483654e+01	-4.542660e+01	-7.385434e+01	-4.949445e+01	-3.177988e+01	-2.674775e+01	3.919207e+01
2.720000e+02	1.952354e+03	1.724453e+02	4.579213e+01	-6.801668e+01	2.351137e+01	1.282390e+02	7.656009e+01	-4.654224e+01	-2.209302e+01	1.127363e+01	7.006395e+01	3.572310e+01	-7.466144e+01	-1.090024e+02	-6.918199e+01	-3.174233e+01	-2.065925e+01	5.542647e+01
2.730000e+02	2.008962e+03	1.658417e+02	5.488848e+01	-5.063139e+01	3.003001e+01	1.687621e+02	6.506720e+01	-7.158060e+01	-4.408062e+01	2.535741e+01	9.249908e+01	5.285761e+01	-1.056196e+02	-1.452611e+02	-9.198055e+01	-3.155317e+01	-1.758925e+01	6.899760e+01
2.740000e+02	2.052995e+03	1.506999e+02	6.273291e+01	-3.328057e+01	3.468811e+01	2.025806e+02	4.569027e+01	-9.577518e+01	-6.711938e+01	3.788148e+01	1.098919e+02	6.653748e+01	-1.357402e+02	-1.790946e+02	-1.153790e+02	-3.058040e+01	-1.677805e+01	8.012252e+01
2.750000e+02	2.088178e+03	1.331128e+02	7.073701e+01	-1.441435e+01	4.079772e+01	2.267543e+02	1.885908e+01	-1.182884e+02	-8.955656e+01	4.881333e+01	1.221487e+02	7.754535e+01	-1.625213e+02	-2.071246e+02	-1.366739e+02	-2.832214e+01	-1.675634e+01	8.953953e+01
2.760000e+02	2.123195e+03	1.192967e+02	7.958080e+01	7.755615e+00	5.196591e+01	2.394703e+02	-1.358578e+01	-1.388354e+02	-1.098628e+02	5.796199e+01	1.296483e+02	8.693466e+01	-1.840145e+02	-2.267281e+02	-1.535238e+02	-2.401100e+01	-1.567976e+01	9.836542e+01
2.770000e+02	2.169627e+03	1.146508e+02	8.910310e+01	3.518706e+01	7.169746e+01	2.401679e+02	-4.832031e+01	-1.575731e+02	-1.268093e+02	6.494871e+01	1.330476e+02	9.571259e+01	-1.991691e+02	-2.365041e+02	-1.644010e+02	-1.635374e+01	-1.180456e+01	1.078088e+02
2.780000e+02	2.238494e+03	1.226135e+02	9.828687e+01	6.950111e+01	1.027217e+02	2.294962e+02	-8.092562e+01	-1.748127e+02	-1.396080e+02	6.925832e+01	1.330259e+02	1.044632e+02	-2.079527e+02	-2.365154e+02	-1.688322e+02	-3.762664e+00	-3.980148e+00	1.187870e+02
2.790000e+02	2.336340e+03	1.435020e+02	1.053227e+02	1.109709e+02	1.459956e+02	2.091092e+02	-1.068070e+02	-1.906671e+02	-1.480180e+02	7.036598e+01	1.300249e+02	1.130151e+02	-2.112504e+02	-2.282601e+02	-1.673834e+02	1.485730e+01	7.993414e+00	1.315594e+02
2.800000e+02	2.462056e+03	1.738748e+02	1.078368e+02	1.573945e+02	1.996846e+02	1.813550e+02	-1.224111e+02	-2.047814e+02	-1.523980e+02	6.791019e+01	1.240719e+02	1.202936e+02	-2.105943e+02	-2.143726e+02	-1.614177e+02	3.909647e+01	2.326510e+01	1.455225e+02
2.810000e+02	2.605610e+03	2.070076e+02	1.033765e+02	2.035533e+02	2.586800e+02	1.489453e+02	-1.262526e+02	-2.162725e+02	-1.536642e+02	6.186224e+01	1.147712e+02	1.244704e+02	-2.078037e+02	-1.981045e+02	-1.527088e+02	6.639734e+01	4.013133e+01	1.592742e+02
2.820000e+02	2.749409e+03	2.346971e+02	9.012754e+01	2.418775e+02	3.151676e+02	1.146871e+02	-1.192179e+02	-2.239218e+02	-1.531245e+02	5.263664e+01	1.015017e+02	1.234338e+02	-2.046069e+02	-1.826749e+02	-1.430214e+02	9.232946e+01	5.647132e+01	1.709616e+02
2.830000e+02	2.872203e+03	2.499786e+02	6.767275e+01	2.644443e+02	3.603837e+02	8.131816e+01	-1.038730e+02	-2.265640e+02	-1.521949e+02	4.110272e+01	8.378724e+01	1.154717e+02	-2.023021e+02	-1.706177e+02	-1.337580e+02	1.119512e+02	7.027335e+01	1.788095e+02
2.840000e+02	2.954538e+03	2.497793e+02	3.750144e+01	2.657470e+02	3.871280e+02	5.144623e+01	-8.295851e+01	-2.235256e+02	-1.520674e+02	2.848934e+01	6.171716e+01	9.994745e+01	-2.014993e+02	-1.632692e+02	-1.257430e+02	1.218696e+02	8.007707e+01	1.816460e+02
2.850000e+02	2.984023e+03	2.363811e+02	3.018729e+00	2.451519e+02	3.921432e+02	2.754905e+01	-5.771884e+01	-2.149374e+02	-1.534294e+02	1.620860e+01	3.625633e+01	7.771644e+01	-2.019894e+02	-1.605295e+02	-1.191741e+02	1.221467e+02	8.519656e+01	1.792361e+02
2.860000e+02	2.958551e+03	2.169430e+02	-3.102272e+01	2.079122e+02	3.773685e+02	1.196355e+01	-2.690372e+01	-2.017908e+02	-1.563327e+02	5.643761e+00	9.298395e+00	5.110177e+01	-2.027815e+02	-1.609784e+02	-1.137256e+02	1.170973e+02	8.567972e+01	1.723118e+02
2.870000e+02	2.886230e+03	2.010948e+02	-5.952688e+01	1.641033e+02	3.494367e+02	6.770787e+00	1.291777e+01	-1.857060e+02	-1.602517e+02	-2.054730e+00	-1.660036e+01	2.339947e+01	-2.023262e+02	-1.623266e+02	-1.087527e+02	1.143815e+02	8.206151e+01	1.623014e+02
2.880000e+02	2.782043e+03	1.974353e+02	-7.818717e+01	1.256932e+02	3.174759e+02	1.350516e+01	6.565486e+01	-1.684982e+02	-1.643025e+02	-6.135987e+00	-3.875512e+01	-1.940458e+00	-1.988984e+02	-1.620841e+02	-1.035204e+02	1.225045e+02	7.503847e+01	1.508638e+02
2.890000e+02	2.662568e+03	2.102665e+02	-8.439860e+01	1.027698e+02	2.899950e+02	3.270024e+01	1.332045e+02	-1.517079e+02	-1.675335e+02	-6.361300e+00	-5.499949e+01	-2.218705e+01	-1.910536e+02	-1.582415e+02	-9.738519e+01	1.475804e+02	6.520423e+01	1.393867e+02
2.900000e+02	2.540859e+03	2.378477e+02	-7.768998e+01	1.003471e+02	2.720454e+02	6.341534e+01	2.132394e+02	-1.362718e+02	-1.691878e+02	-3.044358e+00	-6.423658e+01	-3.596044e+01	-1.780398e+02	-1.497640e+02	-8.988540e+01	1.906350e+02	5.294255e+01	1.286033e+02
2.910000e+02	2.423487e+03	2.728671e+02	-5.959204e+01	1.169577e+02	2.637619e+02	1.029908e+02	2.983454e+02	-1.224472e+02	-1.688670e+02	3.007800e+00	-6.670236e+01	-4.341205e+01	-1.600525e+02	-1.367625e+02	-8.074804e+01	2.465981e+02	3.849945e+01	1.184454e+02
2.920000e+02	2.310634e+03	3.049448e+02	-3.304695e+01	1.455187e+02	2.608260e+02	1.472640e+02	3.770788e+02	-1.099991e+02	-1.665772e+02	1.067642e+01	-6.383429e+01	-4.590171e+01	-1.382699e+02	-1.203376e+02	-6.986311e+01	3.054848e+02	2.218179e+01	1.081819e+02
2.930000e+02	2.198805e+03	3.241761e+02	-1.599767e+00	1.760484e+02	2.566049e+02	1.913064e+02	4.367206e+02	-9.855359e+01	-1.626786e+02	1.882603e+01	-5.776715e+01	-4.529901e+01	-1.146724e+02	-1.022045e+02	-5.729180e+01	3.553784e+02	4.580833e+00	9.681482e+01
2.940000e+02	2.084582e+03	3.243440e+02	3.134765e+01	1.991214e+02	2.450548e+02	2.304861e+02	4.667743e+02	-8.796375e+01	-1.577787e+02	2.664501e+01	-5.061130e+01	-4.316999e+01	-9.170623e+01	-8.426508e+01	-4.334360e+01	3.860958e+02	-1.328771e+01	8.361567e+01
2.950000e+02	1.967649e+03	3.046123e+02	6.300150e+01	2.087523e+02	2.231999e+02	2.614624e+02	4.619315e+02	-7.853193e+01	-1.525953e+02	3.390915e+01	-4.376018e+01	-4.015416e+01	-7.187544e+01	-6.826956e+01	-2.869808e+01	3.921682e+02	-3.000263e+01	6.861249e+01
2.960000e+02	1.851868e+03	2.691809e+02	9.127794e+01	2.037493e+02	1.922294e+02	2.827151e+02	4.234565e+02	-7.099618e+01	-1.478040e+02	4.103659e+01	-3.748106e+01	-3.577114e+01	-5.734082e+01	-5.563102e+01	-1.449233e+01	3.740931e+02	-4.392915e+01	5.282699e+01
2.970000e+02	1.744314e+03	2.252170e+02	1.146192e+02	1.872571e+02	1.568600e+02	2.944182e+02	3.585846e+02	-6.627959e+01	-1.438822e+02	4.886625e+01	-3.095126e+01	-2.873623e+01	-4.958640e+01	-4.737146e+01	-2.281198e+00	3.375418e+02	-5.353159e+01	3.812828e+01
2.980000e+02	1.653067e+03	1.800273e+02	1.317191e+02	1.649179e+02	1.233168e+02	2.977936e+02	2.782943e+02	-6.509479e+01	-1.409751e+02	5.821688e+01	-2.273367e+01	-1.766330e+01	-4.920017e+01	-4.412989e+01	6.181864e+00	2.909967e+02	-5.770920e+01	2.671415e+01
2.990000e+02	1.584957e+03	1.386438e+02	1.413822e+02	1.425129e+02	9.680026e+01	2.943282e+02	1.943459e+02	-6.755549e+01	-1.388332e+02	6.941012e+01	-1.150639e+01	-1.867402e+00	-5.580899e+01	-4.617011e+01	9.317951e+00	2.428090e+02	-5.604996e+01	2.038939e+01
3.000000e+02	1.544114e+03	1.027206e+02	1.426628e+02	1.239969e+02	7.944957e+01	2.852853e+02	1.165993e+02	-7.295007e+01	-1.368679e+02	8.199245e+01	3.247482e+00	1.807488e+01	-6.819407e+01	-5.336680e+01	6.146519e+00	1.987522e+02	-4.892984e+01	1.991031e+01
3.010000e+02	1.531595e+03	7.104734e+01	1.352862e+02	1.105462e+02	6.955995e+01	2.717406e+02	5.135974e+01	-7.977760e+01	-1.343402e+02	9.481824e+01	2.086730e+01	4.025587e+01	-8.457934e+01	-6.519093e+01	-3.383481e+00	1.608284e+02	-3.744074e+01	2.464918e+01
3.020000e+02	1.545796e+03	4.133971e+01	1.201910e+02	1.008005e+02	6.231733e+01	2.550530e+02	1.028602e+00	-8.605256e+01	-1.306347e+02	1.064792e+02	3.959783e+01	6.189726e+01	-1.030299e+02	-8.073061e+01	-1.828088e+01	1.275598e+02	-2.318586e+01	3.270577e+01
3.030000e+02	1.583202e+03	1.251443e+01	9.993170e+01	9.205789e+01	5.176407e+01	2.374130e+02	-3.511622e+01	-8.978710e+01	-1.255154e+02	1.158748e+02	5.706999e+01	8.014675e+01	-1.218423e+02	-9.876577e+01	-3.667315e+01	9.548779e+01	-8.014022e+00	4.141459e+01
3.040000e+02	1.639178e+03	-1.348850e+01	7.867153e+01	8.191577e+01	3.329744e+01	2.220481e+02	-5.946885e+01	-8.949568e+01	-1.192516e+02	1.226266e+02	7.096173e+01	9.287090e+01	-1.397926e+02	-1.178836e+02	-5.619978e+01	6.125050e+01	6.233996e+00	4.804914e+01
3.050000e+02	1.708737e+03	-3.109658e+01	6.160224e+01	6.975162e+01	5.831688e+00	2.128369e+02	-7.452030e+01	-8.456039e+01	-1.125486e+02	1.271055e+02	7.956912e+01	9.911749e+01	-1.561496e+02	-1.366014e+02	-7.451297e+01	2.349125e+01	1.791950e+01	5.047122e+01
3.060000e+02	1.787332e+03	-3.205149e+01	5.382076e+01	5.751009e+01	-2.714168e+01	2.133939e+02	-8.163728e+01	-7.534534e+01	-1.063115e+02	1.300498e+02	8.208810e+01	9.908388e+01	-1.704686e+02	-1.534730e+02	-8.972530e+01	-1.604903e+01	2.572905e+01	4.752413e+01
3.070000e+02	1.871570e+03	-7.709747e+00	5.892821e+01	4.947004e+01	-5.801867e+01	2.259704e+02	-8.051040e+01	-6.303504e+01	-1.013486e+02	1.319741e+02	7.855717e+01	9.366075e+01	-1.822857e+02	-1.671822e+02	-1.006726e+02	-5.262039e+01	2.874509e+01	3.908856e+01
3.080000e+02	1.959627e+03	4.802839e+01	7.780379e+01	5.099250e+01	-7.700425e+01	2.506322e+02	-6.937274e+01	-4.926267e+01	-9.814871e+01	1.326959e+02	6.956470e+01	8.380998e+01	-1.909003e+02	-1.766551e+02	-1.069426e+02	-7.970378e+01	2.649402e+01	2.585074e+01
3.090000e+02	2.051060e+03	1.362112e+02	1.080491e+02	6.662396e+01	-7.492170e+01	2.850814e+02	-4.585671e+01	-3.565782e+01	-9.681934e+01	1.312564e+02	5.591301e+01	7.009491e+01	-1.953930e+02	-1.812111e+02	-1.087142e+02	-9.097438e+01	1.899298e+01	8.926684e+00
3.100000e+02	2.145944e+03	2.517558e+02	1.444331e+02	9.822247e+01	-4.600071e+01	3.252350e+02	-8.152594e+00	-2.346011e+01	-9.718165e+01	1.263119e+02	3.842022e+01	5.259039e+01	-1.949013e+02	-1.807310e+02	-1.065166e+02	-8.229648e+01	6.796676e+00	-1.048242e+01
3.110000e+02	2.243585e+03	3.843320e+02	1.803144e+02	1.438378e+02	1.029678e+01	3.663779e+02	4.397310e+01	-1.331149e+01	-9.893649e+01	1.168322e+02	1.794330e+01	3.120716e+01	-1.890293e+02	-1.757653e+02	-1.010226e+02	-5.304372e+01	-8.975190e+00	-3.126319e+01
3.120000e+02	2.341342e+03	5.209823e+02	2.096106e+02	1.978327e+02	8.902916e+01	4.044945e+02	1.086851e+02	-5.269274e+00	-1.017894e+02	1.027825e+02	-4.427407e+00	6.262287e+00	-1.781764e+02	-1.674865e+02	-9.293648e+01	-6.301616e+00	-2.666026e+01	-5.233825e+01
3.130000e+02	2.434133e+03	6.495038e+02	2.286073e+02	2.522520e+02	1.811437e+02	4.373152e+02	1.822798e+02	9.971503e-01	-1.054665e+02	8.547081e+01	-2.715430e+01	-2.099304e+01	-1.635959e+02	-1.574345e+02	-8.297328e+01	5.205021e+01	-4.415509e+01	-7.244933e+01
3.140000e+02	2.514940e+03	7.612777e+02	2.369188e+02	2.989424e+02	2.759013e+02	4.647232e+02	2.599476e+02	5.922893e+00	-1.096357e+02	6.739253e+01	-4.819382e+01	-4.816630e+01	-1.471269e+02	-1.470993e+02	-7.187152e+01	1.149517e+02	-5.911302e+01	-8.993011e+01
3.150000e+02	2.576177e+03	8.524870e+02	2.372422e+02	3.316394e+02	3.634471e+02	4.883953e+02	3.367330e+02	9.794883e+00	-1.138184e+02	5.163113e+01	-6.519817e+01	-7.198236e+01	-1.307010e+02	-1.374851e+02	-6.038092e+01	1.758248e+02	-6.923463e+01	-1.026545e+02
3.160000e+02	2.611439e+03	9.234366e+02	2.340505e+02	3.473054e+02	4.366628e+02	5.108323e+02	4.082779e+02	1.262651e+01	-1.173853e+02	4.105062e+01	-7.595662e+01	-8.896142e+01	-1.158301e+02	-1.288348e+02	-4.919852e+01	2.297057e+02	-7.261933e+01	-1.082836e+02
3.170000e+02	2.617002e+03	9.765852e+02	2.318209e+02	3.463638e+02	4.918395e+02	5.341561e+02	4.711007e+02	1.420585e+01	-1.196738e+02	3.757951e+01	-7.893438e+01	-9.630039e+01	-1.032739e+02	-1.206398e+02	-3.887401e+01	2.735703e+02	-6.811672e+01	-1.047976e+02
3.180000e+02	2.592615e+03	1.014435e+03	2.335559e+02	3.319368e+02	5.282458e+02	5.591414e+02	5.224481e+02	1.430090e+01	-1.201735e+02	4.181373e+01	-7.370853e+01	-9.266096e+01	-9.298875e+01	-1.119411e+02	-2.973513e+01	3.059512e+02	-5.559305e+01	-9.114337e+01
3.190000e+02	2.541442e+03	1.038329e+03	2.401619e+02	3.085260e+02	5.470682e+02	5.848591e+02	5.599945e+02	1.294576e+01	-1.186701e+02	5.301618e+01	-6.113120e+01	-7.859997e+01	-8.433143e+01	-1.018002e+02	-2.188014e+01	3.262094e+02	-3.602829e+01	-6.774567e+01
3.200000e+02	2.469372e+03	1.048545e+03	2.507965e+02	2.806610e+02	5.503075e+02	6.090625e+02	5.817181e+02	1.069090e+01	-1.152516e+02	6.944038e+01	-4.315323e+01	-5.650238e+01	-7.640387e+01	-8.975302e+01	-1.525005e+01	3.338874e+02	-1.139197e+01	-3.665624e+01
3.210000e+02	2.384032e+03	1.045281e+03	2.638195e+02	2.519042e+02	5.400347e+02	6.291318e+02	5.861203e+02	8.694448e+00	-1.101655e+02	8.881556e+01	-2.237071e+01	-3.004463e+01	-6.840223e+01	-7.607617e+01	-9.746985e+00	3.284362e+02	1.569075e+01	-1.256061e+00
3.220000e+02	2.293798e+03	1.029633e+03	2.777319e+02	2.243619e+02	5.181145e+02	6.431289e+02	5.726991e+02	8.571841e+00	-1.036131e+02	1.088198e+02	-1.455428e+00	-3.365275e+00	-5.986589e+01	-6.177578e+01	-5.333249e+00	3.093821e+02	4.240276e+01	3.440126e+01
3.230000e+02	2.206891e+03	1.003839e+03	2.915835e+02	1.986567e+02	4.862720e+02	6.504479e+02	5.424054e+02	1.200611e+01	-9.561087e+01	1.274156e+02	1.733945e+01	1.979844e+01	-5.077291e+01	-4.831395e+01	-2.048136e+00	2.768051e+02	6.620564e+01	6.638815e+01
3.240000e+02	2.130519e+03	9.706210e+02	3.047001e+02	1.742307e+02	4.463105e+02	6.517215e+02	4.978198e+02	2.022288e+01	-8.600918e+01	1.429946e+02	3.245575e+01	3.676232e+01	-4.147596e+01	-3.716941e+01	8.004845e-02	2.319011e+02	8.519925e+01	9.159967e+01
3.250000e+02	2.069985e+03	9.321441e+02	3.160192e+02	1.498599e+02	4.003452e+02	6.480139e+02	4.429621e+02	3.350931e+01	-7.465545e+01	1.543522e+02	4.304832e+01	4.618725e+01	-3.251246e+01	-2.937356e+01	1.189179e+00	1.774088e+02	9.830195e+01	1.081740e+02
3.260000e+02	2.027897e+03	8.893559e+02	3.235638e+02	1.242959e+02	3.509998e+02	6.397203e+02	3.828474e+02	5.096413e+01	-6.159773e+01	1.605666e+02	4.881381e+01	4.800454e+01	-2.435533e+01	-2.516464e+01	1.720851e+00	1.177412e+02	1.052495e+02	1.155811e+02
3.270000e+02	2.003739e+03	8.422390e+02	3.245156e+02	9.694806e+01	3.015325e+02	6.257860e+02	3.229836e+02	7.059532e+01	-4.719785e+01	1.608847e+02	4.976554e+01	4.309133e+01	-1.719250e+01	-2.386674e+01	2.450600e+00	5.874006e+01	1.064617e+02	1.144339e+02
3.280000e+02	1.994159e+03	7.909030e+02	3.160147e+02	6.846037e+01	2.558206e+02	6.037377e+02	2.689290e+02	8.975849e+01	-3.208194e+01	1.547090e+02	4.608427e+01	3.286842e+01	-1.081790e+01	-2.403379e+01	4.366736e+00	7.041084e+00	1.028413e+02	1.061376e+02
3.290000e+02	1.994101e+03	7.369353e+02	2.964155e+02	4.098228e+01	2.181089e+02	5.706346e+02	2.258877e+02	1.058045e+02	-1.695857e+01	1.417306e+02	3.810656e+01	1.896728e+01	-4.677813e+00	-2.381715e+01	8.427751e+00	-3.087587e+01	9.555977e+01	9.250582e+01
3.300000e+02	1.998617e+03	6.842761e+02	2.664858e+02	1.795454e+01	1.924721e+02	5.246133e+02	1.982400e+02	1.167310e+02	-2.417316e+00	1.221827e+02	2.642297e+01	3.034243e+00	1.944771e+00	-2.144405e+01	1.529029e+01	-4.978952e+01	8.585810e+01	7.543908e+01
3.310000e+02	2.004831e+03	6.391393e+02	2.300482e+02	3.371587e+00	1.820570e+02	4.664264e+02	1.889535e+02	1.216346e+02	1.116625e+01	9.712595e+01	1.199741e+01	-1.334252e+01	9.678875e+00	-1.566119e+01	2.511477e+01	-4.675793e+01	7.488112e+01	5.671875e+01
3.320000e+02	2.013465e+03	6.089641e+02	1.937761e+02	7.008188e-01	1.882935e+02	4.003893e+02	1.989606e+02	1.208403e+02	2.355715e+01	6.863801e+01	-3.786192e+00	-2.864520e+01	1.884095e+01	-6.018215e+00	3.751684e+01	-2.181089e+01	6.355835e+01	3.791682e+01
3.330000e+02	2.029375e+03	6.007548e+02	1.661391e+02	1.182552e+01	2.103234e+02	3.343739e+02	2.267045e+02	1.156938e+02	3.445999e+01	3.978882e+01	-1.920216e+01	-4.144502e+01	2.931417e+01	7.071135e+00	5.166382e+01	2.187013e+01	5.254635e+01	2.038658e+01
3.340000e+02	2.060809e+03	6.193112e+02	1.557079e+02	3.641544e+01	2.448554e+02	2.787843e+02	2.680789e+02	1.081173e+02	4.331444e+01	1.432974e+01	-3.238148e+01	-5.047312e+01	4.056704e+01	2.247522e+01	6.645599e+01	7.835240e+01	4.223884e+01	5.282065e+00
3.350000e+02	2.117412e+03	6.657771e+02	1.691533e+02	7.197223e+01	2.865443e+02	2.446856e+02	3.168983e+02	1.000875e+02	4.922743e+01	-3.900737e+00	-4.158589e+01	-5.476088e+01	5.179971e+01	3.862456e+01	8.071221e+01	1.398752e+02	3.283208e+01	-6.437411e+00
3.360000e+02	2.207225e+03	7.367838e+02	2.093431e+02	1.145115e+02	3.288463e+02	2.414119e+02	3.658809e+02	9.319807e+01	5.112119e+01	-1.175936e+01	-4.549899e+01	-5.383629e+01	6.216835e+01	5.383093e+01	9.330408e+01	1.981395e+02	2.441212e+01	-1.403588e+01
3.370000e+02	2.333284e+03	8.243671e+02	2.739975e+02	1.595786e+02	3.651814e+02	2.741025e+02	4.079740e+02	8.840954e+01	4.806769e+01	-7.587495e+00	-4.347890e+01	-4.792942e+01	7.101714e+01	6.656653e+01	1.032309e+02	2.457493e+02	1.702143e+01	-1.705432e+01
3.380000e+02	2.490730e+03	9.167840e+02	3.553630e+02	2.031940e+02	3.901564e+02	3.417398e+02	4.377411e+02	8.601221e+01	3.968124e+01	8.222873e+00	-3.572171e+01	-3.810817e+01	7.804818e+01	7.566168e+01	1.096702e+02	2.775600e+02	1.067246e+01	-1.536711e+01
3.390000e+02	2.665556e+03	1.000283e+03	4.412339e+02	2.424355e+02	4.005846e+02	4.363217e+02	4.524976e+02	8.575193e+01	2.640094e+01	3.309617e+01	-2.329074e+01	-2.625489e+01	8.338313e+01	8.041899e+01	1.120484e+02	2.916912e+02	5.302891e+00	-9.220269e+00
3.400000e+02	2.835958e+03	1.061666e+03	5.173128e+02	2.755993e+02	3.960807e+02	5.436821e+02	4.529194e+02	8.703811e+01	9.533565e+00	6.267850e+01	-7.981316e+00	-1.482609e+01	8.750945e+01	8.066473e+01	1.101531e+02	2.899805e+02	6.988931e-01	7.620253e-01
3.410000e+02	2.976547e+03	1.091157e+03	5.704315e+02	3.020916e+02	3.790919e+02	6.460723e+02	4.429507e+02	8.916064e+01	-8.973977e+00	9.172168e+01	7.973048e+00	-6.412942e+00	9.114291e+01	7.675701e+01	1.042578e+02	2.777206e+02	-3.565473e+00	1.361314e+01
3.420000e+02	3.064540e+03	1.084780e+03	5.917376e+02	3.222411e+02	3.543390e+02	7.260174e+02	4.289802e+02	9.147652e+01	-2.695299e+01	1.152193e+02	2.229527e+01	-3.210138e+00	9.505593e+01	6.955063e+01	9.519193e+01	2.626294e+02	-8.123796e+00	2.811256e+01
3.430000e+02	3.085953e+03	1.045421e+03	5.788225e+02	3.371053e+02	3.277651e+02	7.703843e+02	4.184078e+02	9.355604e+01	-4.247076e+01	1.294687e+02	3.305592e+01	-6.558047e+00	9.991216e+01	6.029831e+01	8.428341e+01	2.531717e+02	-1.372035e+01	4.293221e+01
3.440000e+02	3.039474e+03	9.820585e+02	5.360536e+02	3.481845e+02	3.052056e+02	7.733727e+02	4.178820e+02	9.528243e+01	-5.417372e+01	1.327433e+02	3.894431e+01	-1.671267e+01	1.061229e+02	5.046602e+01	7.313941e+01	2.565361e+02	-2.102920e+01	5.682400e+01
3.450000e+02	2.936402e+03	9.073217e+02	4.729978e+02	3.569188e+02	2.910862e+02	7.374324e+02	4.316076e+02	9.688147e+01	-6.142453e+01	1.253894e+02	3.934121e+01	-3.291643e+01	1.137239e+02	4.146640e+01	6.330005e+01	2.767392e+02	-3.043458e+01	6.880352e+01
3.460000e+02	2.796652e+03	8.341957e+02	4.015244e+02	3.639940e+02	2.874872e+02	6.718676e+02	4.601740e+02	9.884303e+01	-6.423614e+01	1.093527e+02	3.419576e+01	-5.372632e+01	1.222793e+02	3.435731e+01	5.586486e+01	3.133861e+02	-4.184068e+01	7.826843e+01
3.470000e+02	2.642494e+03	7.730434e+02	3.326333e+02	3.687278e+02	2.938631e+02	5.897550e+02	5.002893e+02	1.017162e+02	-6.308341e+01	8.734292e+01	2.379726e+01	-7.745653e+01	1.308435e+02	2.958973e+01	5.121972e+01	3.615233e+02	-5.457876e+01	8.500787e+01
3.480000e+02	2.492549e+03	7.299422e+02	2.740580e+02	3.689463e+02	3.075446e+02	5.043774e+02	5.455974e+02	1.058186e+02	-5.870002e+01	6.196209e+01	8.582011e+00	-1.025564e+02	1.380351e+02	2.689665e+01	4.896820e+01	4.127627e+02	-6.745602e+01	8.910755e+01
3.490000e+02	2.358222e+03	7.066834e+02	2.292786e+02	3.616418e+02	3.249106e+02	4.263909e+02	5.884416e+02	1.109700e+02	-5.193699e+01	3.512030e+01	-1.090669e+01	-1.277865e+02	1.422615e+02	2.538158e+01	4.810411e+01	4.574850e+02	-7.895050e+01	9.080837e+01
3.500000e+02	2.243377e+03	7.020128e+02	1.979507e+02	3.443207e+02	3.428617e+02	3.624419e+02	6.221004e+02	1.163885e+02	-4.369727e+01	7.926081e+00	-3.387933e+01	-1.521595e+02	1.420810e+02	2.380067e+01	4.737731e+01	4.875615e+02	-8.751308e+01	9.039714e+01
3.510000e+02	2.146561e+03	7.131944e+02	1.772392e+02	3.165166e+02	3.600572e+02	3.152349e+02	6.427960e+02	1.208382e+02	-3.490808e+01	-1.898258e+01	-5.907536e+01	-1.747287e+02	1.366132e+02	2.095978e+01	4.573313e+01	4.987869e+02	-9.190360e+01	8.817968e+01
3.520000e+02	2.064189e+03	7.370073e+02	1.633545e+02	2.807245e+02	3.773942e+02	2.844973e+02	6.507749e+02	1.230002e+02	-2.647997e+01	-4.490537e+01	-8.462719e+01	-1.943853e+02	1.258549e+02	1.609664e+01	4.267234e+01	4.922087e+02	-9.147426e+01	8.452591e+01
3.530000e+02	1.993183e+03	7.698038e+02	1.527447e+02	2.421764e+02	3.974498e+02	2.681334e+02	6.500286e+02	1.219204e+02	-1.922919e+01	-6.867205e+01	-1.081748e+02	-2.098214e+02	1.107601e+02	9.113359e+00	3.839870e+01	4.738277e+02	-8.632603e+01	7.992513e+01
3.540000e+02	1.932306e+03	8.069318e+02	1.427539e+02	2.073915e+02	4.230159e+02	2.630808e+02	6.466956e+02	1.173347e+02	-1.378277e+01	-8.860618e+01	-1.272787e+02	-2.197234e+02	9.302051e+01	5.756294e-01	3.369343e+01	4.526686e+02	-7.729845e+01	7.498315e+01
3.550000e+02	1.882319e+03	8.422604e+02	1.318673e+02	1.820182e+02	4.552683e+02	2.657894e+02	6.466893e+02	1.097277e+02	-1.050878e+01	-1.028949e+02	-1.400156e+02	-2.231312e+02	7.460130e+01	-8.514374e+00	2.955927e+01	4.378136e+02	-6.580128e+01	7.033548e+01
3.560000e+02	1.845550e+03	8.685007e+02	1.197710e+02	1.688500e+02	4.923352e+02	2.725389e+02	6.534078e+02	1.001135e+02	-9.502268e+00	-1.101735e+02	-1.455172e+02	-2.197890e+02	5.720022e+01	-1.707161e+01	2.677218e+01	4.354006e+02	-5.353805e+01	6.650987e+01
3.570000e+02	1.825390e+03	8.785330e+02	1.073633e+02	1.668430e+02	5.289306e+02	2.798677e+02	6.663596e+02	8.966113e+01	-1.062101e+01	-1.100184e+02	-1.442029e+02	-2.103003e+02	4.183862e+01	-2.425876e+01	2.552313e+01	4.466229e+02	-4.219325e+01	6.380528e+01
3.580000e+02	1.825863e+03	8.673559e+02	9.669407e+01	1.715326e+02	5.573231e+02	2.851945e+02	6.811698e+02	7.934970e+01	-1.353247e+01	-1.031050e+02	-1.375818e+02	-1.959869e+02	2.874052e+01	-2.966457e+01	2.530092e+01	4.673899e+02	-3.314944e+01	6.224171e+01
3.590000e+02	1.851048e+03	8.339061e+02	9.073863e+01	1.766679e+02	5.693860e+02	2.874536e+02	6.908870e+02	6.980025e+01	-1.773134e+01	-9.097285e+01	-1.276944e+02	-1.785042e+02	1.752709e+01	-3.328261e+01	2.506819e+01	4.896745e+02	-2.727508e+01	6.159206e+01
3.600000e+02	1.904160e+03	7.820544e+02	9.297723e+01	1.764293e+02	5.590540e+02	2.874205e+02	6.880375e+02	6.132434e+01	-2.251704e+01	-7.554411e+01	-1.164286e+02	-1.593853e+02	7.612710e+00	-3.534384e+01	2.365895e+01	5.039787e+02	-2.479666e+01	6.146918e+01
3.610000e+02	1.986337e+03	7.204544e+02	1.068763e+02	1.674465e+02	5.243776e+02	2.874879e+02	6.666931e+02	5.411621e+01	-2.696448e+01	-5.863452e+01	-1.049884e+02	-1.397151e+02	-1.394714e+00	-3.612116e+01	2.023378e+01	5.020367e+02	-2.525430e+01	6.143616e+01
3.620000e+02	2.095541e+03	6.613241e+02	1.354061e+02	1.499890e+02	4.685331e+02	2.909021e+02	6.239588e+02	4.845435e+01	-2.994766e+01	-4.164694e+01	-9.370039e+01	-1.200489e+02	-9.472094e+00	-3.582028e+01	1.460963e+01	4.789456e+02	-2.754221e+01	6.112761e+01
3.630000e+02	2.226083e+03	6.184384e+02	1.806307e+02	1.280271e+02	3.995152e+02	3.007353e+02	5.606287e+02	4.478898e+01	-3.026617e+01	-2.549681e+01	-8.216863e+01	-1.005519e+02	-1.621979e+01	-3.460274e+01	7.341457e+00	4.342481e+02	-3.004683e+01	6.038341e+01
3.640000e+02	2.369100e+03	6.045783e+02	2.432501e+02	1.081915e+02	3.286087e+02	3.189600e+02	4.810682e+02	4.365765e+01	-2.688077e+01	-1.069333e+01	-6.964187e+01	-8.123180e+01	-2.110937e+01	-3.269888e+01	-4.601079e-01	3.718839e+02	-3.089671e+01	5.937781e+01
3.650000e+02	2.513871e+03	6.286378e+02	3.219397e+02	9.789960e+01	2.680092e+02	3.458760e+02	3.925085e+02	4.545606e+01	-1.920858e+01	2.535457e+00	-5.541007e+01	-6.212934e+01	-2.379558e+01	-3.051432e+01	-7.490174e+00	2.991981e+02	-2.831986e+01	5.868406e+01
3.660000e+02	2.649477e+03	6.927534e+02	4.125276e+02	1.030826e+02	2.280992e+02	3.799179e+02	3.038988e+02	5.015769e+01	-7.387454e+00	1.413175e+01	-3.910624e+01	-4.341366e+01	-2.433712e+01	-2.864392e+01	-1.265367e+01	2.253031e+02	-2.106372e+01	5.919245e+01
3.670000e+02	2.766216e+03	7.902103e+02	5.073922e+02	1.260745e+02	2.149532e+02	4.177310e+02	2.244007e+02	5.710420e+01	7.588408e+00	2.409572e+01	-2.088824e+01	-2.542044e+01	-2.323935e+01	-2.777084e+01	-1.538555e+01	1.591263e+02	-8.785621e+00	6.183940e+01
3.680000e+02	2.856445e+03	9.051667e+02	5.956895e+02	1.643015e+02	2.286695e+02	4.544316e+02	1.616732e+02	6.496997e+01	2.393218e+01	3.233789e+01	-1.532926e+00	-8.700376e+00	-2.133108e+01	-2.849773e+01	-1.580931e+01	1.075181e+02	7.708652e+00	6.720817e+01
3.690000e+02	2.914949e+03	1.015026e+03	6.648761e+02	2.103323e+02	2.630629e+02	4.841083e+02	1.202773e+02	7.194769e+01	3.934608e+01	3.851633e+01	1.754331e+01	5.914168e+00	-1.955932e+01	-3.118761e+01	-1.471038e+01	7.385232e+01	2.649066e+01	7.516999e+01
3.700000e+02	2.939194e+03	1.095410e+03	7.034428e+02	2.535158e+02	3.070031e+02	5.006791e+02	1.006847e+02	7.612303e+01	5.147782e+01	4.195190e+01	3.437808e+01	1.730610e+01	-1.879662e+01	-3.586772e+01	-1.333925e+01	5.752438e+01	4.484916e+01	8.476728e+01
3.710000e+02	2.929743e+03	1.126504e+03	7.040785e+02	2.828749e+02	3.472258e+02	4.990959e+02	9.931075e+01	7.593426e+01	5.845261e+01	4.172769e+01	4.673094e+01	2.424545e+01	-1.971475e+01	-4.219938e+01	-1.308496e+01	5.455296e+01	5.988987e+01	9.445160e+01
3.720000e+02	2.890739e+03	1.098654e+03	6.660744e+02	2.903707e+02	3.718991e+02	4.766242e+02	1.096738e+02	7.057356e+01	5.934648e+01	3.699810e+01	5.252721e+01	2.577047e+01	-2.272472e+01	-4.948065e+01	-1.508520e+01	5.912965e+01	6.923375e+01	1.026115e+02
3.730000e+02	2.830004e+03	1.015188e+03	5.959412e+02	2.733981e+02	3.738542e+02	4.337350e+02	1.243465e+02	6.019943e+01	5.446702e+01	2.740214e+01	5.037090e+01	2.166923e+01	-2.795257e+01	-5.665349e+01	-1.986656e+01	6.560181e+01	7.159210e+01	1.081589e+02
3.740000e+02	2.758281e+03	8.914082e+02	5.059069e+02	2.356207e+02	3.524227e+02	3.742008e+02	1.370492e+02	4.589091e+01	4.535032e+01	1.338466e+01	3.994066e+01	1.284367e+01	-3.522538e+01	-6.232170e+01	-2.712214e+01	7.020580e+01	6.702246e+01	1.108942e+02
3.750000e+02	2.687537e+03	7.502509e+02	4.108259e+02	1.858997e+02	3.133026e+02	3.042818e+02	1.442124e+02	2.936128e+01	3.446108e+01	-3.751965e+00	2.209948e+01	1.347522e+00	-4.406868e+01	-6.482007e+01	-3.571188e+01	7.199551e+01	5.678133e+01	1.114759e+02
3.760000e+02	2.628789e+03	6.162920e+02	3.246158e+02	1.358034e+02	2.666102e+02	2.312754e+02	1.455973e+02	1.252828e+01	2.466979e+01	-2.211828e+01	-1.335071e+00	-9.976983e+00	-5.373825e+01	-6.237969e+01	-4.390821e+01	7.276814e+01	4.284455e+01	1.110308e+02
3.770000e+02	2.590257e+03	5.101989e+02	2.573928e+02	9.664054e+01	2.239181e+02	1.619359e+02	1.439481e+02	-2.919432e+00	1.864625e+01	-3.972377e+01	-2.806158e+01	-1.815821e+01	-6.330829e+01	-5.340455e+01	-4.982550e+01	7.618332e+01	2.729353e+01	1.106250e+02
3.780000e+02	2.576492e+03	4.452087e+02	2.140477e+02	7.696824e+01	1.953515e+02	1.012708e+02	1.439636e+02	-1.582642e+01	1.832543e+01	-5.496989e+01	-5.580600e+01	-2.081809e+01	-7.181303e+01	-3.682484e+01	-5.190362e+01	8.651429e+01	1.180770e+01	1.108765e+02
3.790000e+02	2.588588e+03	4.261825e+02	1.943790e+02	8.117225e+01	1.876144e+02	5.201060e+01	1.509990e+02	-2.566416e+01	2.456885e+01	-6.694888e+01	-8.267365e+01	-1.671587e+01	-7.840652e+01	-1.244852e+01	-4.929312e+01	1.074737e+02	-2.558338e+00	1.118868e+02
3.800000e+02	2.625024e+03	4.507618e+02	1.943728e+02	1.092302e+02	2.033075e+02	1.477299e+01	1.698321e+02	-3.241196e+01	3.707781e+01	-7.545298e+01	-1.072404e+02	-5.963177e+00	-8.248780e+01	1.878958e+01	-4.202514e+01	1.413758e+02	-1.527032e+01	1.134741e+02
3.810000e+02	2.682436e+03	5.115467e+02	2.079677e+02	1.573876e+02	2.413357e+02	-1.128358e+01	2.036609e+02	-3.630179e+01	5.454181e+01	-8.074066e+01	-1.284201e+02	1.010298e+01	-8.375034e+01	5.477285e+01	-3.092726e+01	1.886650e+02	-2.598716e+01	1.155201e+02
3.820000e+02	2.755835e+03	5.982010e+02	2.286837e+02	2.193032e+02	2.978539e+02	-2.764048e+01	2.533534e+02	-3.755489e+01	7.494988e+01	-8.321214e+01	-1.452551e+02	2.929265e+01	-8.215206e+01	9.239578e+01	-1.733742e+01	2.476997e+02	-3.421159e+01	1.181912e+02
3.830000e+02	2.838325e+03	6.988416e+02	2.507134e+02	2.872560e+02	3.671904e+02	-3.576317e+01	3.169352e+02	-3.623839e+01	9.596612e+01	-8.316684e+01	-1.568019e+02	4.903766e+01	-7.784297e+01	1.279967e+02	-2.735357e+00	3.146868e+02	-3.912214e+01	1.218871e+02
3.840000e+02	2.920785e+03	8.007247e+02	2.693796e+02	3.531702e+02	4.424563e+02	-3.683527e+01	3.893875e+02	-3.231482e+01	1.152764e+02	-8.074974e+01	-1.622152e+02	6.684144e+01	-7.110505e+01	1.579517e+02	1.157248e+01	3.837925e+02	-3.969914e+01	1.269400e+02
3.850000e+02	2.992102e+03	8.907512e+02	2.811205e+02	4.094202e+02	5.159237e+02	-3.191927e+01	4.629433e+02	-2.586393e+01	1.308435e+02	-7.608130e+01	-1.610085e+02	8.062607e+01	-6.233989e+01	1.792948e+02	2.461760e+01	4.475882e+02	-3.511189e+01	1.332385e+02
3.860000e+02	3.040270e+03	9.564311e+02	2.833138e+02	4.495259e+02	5.795001e+02	-2.236461e+01	5.280840e+02	-1.736432e+01	1.410558e+02	-6.946810e+01	-1.533540e+02	8.895188e+01	-5.209592e+01	1.902101e+02	3.576450e+01	4.980018e+02	-2.519683e+01	1.399941e+02
3.870000e+02	3.054225e+03	9.876014e+02	2.742298e+02	4.688692e+02	6.256026e+02	-1.014540e+01	5.752690e+02	-7.877735e+00	1.447992e+02	-6.155633e+01	-1.402472e+02	9.112050e+01	-4.108944e+01	1.902785e+02	4.459437e+01	5.277806e+02	-1.079300e+01	1.458037e+02
3.880000e+02	3.025957e+03	9.785799e+02	2.532289e+02	4.654290e+02	6.484607e+02	2.157247e+00	5.970942e+02	9.914226e-01	1.415098e+02	-5.333167e+01	-1.234197e+02	8.718653e+01	-3.016819e+01	1.804382e+02	5.077650e+01	5.321873e+02	6.253736e+00	1.490184e+02
3.890000e+02	2.952304e+03	9.299076e+02	2.210877e+02	4.403371e+02	6.455071e+02	1.180140e+01	5.902628e+02	7.391883e+00	1.312476e+02	-4.595638e+01	-1.050075e+02	7.789917e+01	-2.019888e+01	1.627079e+02	5.401185e+01	5.104045e+02	2.346718e+01	1.482902e+02
3.900000e+02	2.835927e+03	8.487434e+02	1.801822e+02	3.979355e+02	6.182901e+02	1.655492e+01	5.566440e+02	9.687331e+00	1.147881e+02	-4.051682e+01	-8.710118e+01	6.458383e+01	-1.190946e+01	1.397756e+02	5.407659e+01	4.660884e+02	3.837631e+01	1.430842e+02
3.910000e+02	2.685201e+03	7.474195e+02	1.342757e+02	3.450950e+02	5.724002e+02	1.522015e+01	5.029368e+02	6.912023e+00	9.366603e+01	-3.778941e+01	-7.134676e+01	4.896449e+01	-5.749309e+00	1.145620e+02	5.092943e+01	4.067470e+02	4.916778e+01	1.339501e+02
3.920000e+02	2.512958e+03	6.404588e+02	8.785580e+01	2.898387e+02	5.162604e+02	7.705054e+00	4.389604e+02	-9.553096e-01	7.008355e+01	-3.810803e+01	-5.872583e+01	3.293075e+01	-1.825688e+00	8.983092e+01	4.481273e+01	3.420532e+02	5.510264e+01	1.224274e+02
3.930000e+02	2.334283e+03	5.410534e+02	4.520717e+01	2.396509e+02	4.590991e+02	-5.406179e+00	3.751330e+02	-1.299677e+01	4.663202e+01	-4.135835e+01	-4.954847e+01	1.827039e+01	6.374851e-02	6.788263e+01	3.628753e+01	2.816161e+02	5.654880e+01	1.105957e+02
3.940000e+02	2.163830e+03	4.582408e+02	9.559708e+00	2.000461e+02	4.087784e+02	-2.353791e+01	3.200150e+02	-2.761935e+01	2.586349e+01	-4.707001e+01	-4.360441e+01	6.412815e+00	3.289615e-01	5.034619e+01	2.618357e+01	2.329471e+02	5.464654e+01	1.004134e+02
3.950000e+02	2.013311e+03	3.956743e+02	-1.738021e+01	1.738807e+02	3.701993e+02	-4.667600e+01	2.787160e+02	-4.295941e+01	9.837444e+00	-5.455350e+01	-4.038003e+01	-1.756613e+00	-5.315448e-01	3.809187e+01	1.548636e+01	2.002458e+02	5.077154e+01	9.307931e+01
3.960000e+02	1.889853e+03	3.521721e+02	-3.538907e+01	1.615545e+02	3.447474e+02	-7.548312e+01	2.525612e+02	-5.727572e+01	-2.001819e-01	-6.303438e+01	-3.926226e+01	-5.958770e+00	-2.020694e+00	3.128280e+01	5.201702e+00	1.842732e+02	4.602258e+01	8.865205e+01
3.970000e+02	1.795640e+03	3.235362e+02	-4.526801e+01	1.618507e+02	3.307984e+02	-1.109013e+02	2.398827e+02	-6.921575e+01	-3.902245e+00	-7.175514e+01	-3.968543e+01	-6.441528e+00	-3.684959e+00	2.955895e+01	-3.768423e+00	1.831411e+02	4.092139e+01	8.607252e+01
3.980000e+02	1.728817e+03	3.047696e+02	-4.820440e+01	1.729199e+02	3.249146e+02	-1.534010e+02	2.374048e+02	-7.791591e+01	-1.675360e+00	-8.002935e+01	-4.120516e+01	-3.788679e+00	-5.117246e+00	3.229926e+01	-1.072218e+01	1.935339e+02	3.540106e+01	8.358303e+01
3.990000e+02	1.685183e+03	2.918829e+02	-4.521302e+01	1.929491e+02	3.231890e+02	-2.021660e+02	2.415940e+02	-8.296879e+01	5.589022e+00	-8.724435e+01	-4.349739e+01	1.313573e+00	-5.942023e+00	3.886898e+01	-1.522102e+01	2.118230e+02	2.903453e+01	7.938253e+01
4.000000e+02	1.659980e+03	2.828279e+02	-3.684087e+01	2.203146e+02	3.222785e+02	-2.545211e+02	2.495276e+02	-8.432705e+01	1.676821e+01	-9.282580e+01	-4.629410e+01	8.269535e+00	-5.803980e+00	4.875971e+01	-1.711679e+01	2.347206e+02	2.136993e+01	7.226920e+01
4.010000e+02	1.649256e+03	2.774992e+02	-2.319973e+01	2.533403e+02	3.199237e+02	-3.058545e+02	2.591651e+02	-8.220918e+01	3.065597e+01	-9.620450e+01	-4.929306e+01	1.666069e+01	-4.378522e+00	6.157531e+01	-1.654160e+01	2.594309e+02	1.222205e+01	6.203359e+01
4.020000e+02	1.650627e+03	2.770346e+02	-4.271976e+00	2.899669e+02	3.150085e+02	-3.501935e+02	2.691881e+02	-7.704132e+01	4.600538e+01	-9.684598e+01	-5.210742e+01	2.620070e+01	-1.421799e+00	7.688642e+01	-1.386675e+01	2.835139e+02	1.812788e+00	4.947276e+01
4.030000e+02	1.663571e+03	2.827693e+02	1.965771e+01	3.276221e+02	3.073539e+02	-3.814360e+02	2.786788e+02	-6.943386e+01	6.153998e+01	-9.439129e+01	-5.432383e+01	3.658248e+01	3.127559e+00	9.403398e+01	-9.649926e+00	3.047515e+02	-9.269467e+00	3.604820e+01
4.040000e+02	1.689462e+03	2.952170e+02	4.764656e+01	3.634050e+02	2.974266e+02	-3.950052e+02	2.868479e+02	-6.016882e+01	7.601690e+01	-8.889878e+01	-5.569320e+01	4.728684e+01	9.004745e+00	1.119849e+02	-4.591944e+00	3.211981e+02	-2.024918e+01	2.334262e+01
4.050000e+02	1.731384e+03	3.134060e+02	7.801047e+01	3.945007e+02	2.860510e+02	-3.894467e+02	2.928802e+02	-5.017055e+01	8.837573e+01	-8.109378e+01	-5.639474e+01	5.745237e+01	1.548157e+01	1.293288e+02	4.912474e-01	3.314027e+02	-3.039608e+01	1.253099e+01
4.060000e+02	1.793568e+03	3.348063e+02	1.086262e+02	4.186469e+02	2.741393e+02	-3.673567e+02	2.958656e+02	-4.044424e+01	9.793820e+01	-7.247481e+01	-5.723755e+01	6.590749e+01	2.131973e+01	1.444649e+02	4.706354e+00	3.346523e+02	-3.922094e+01	4.052828e+00
4.070000e+02	1.880282e+03	3.559162e+02	1.375734e+02	4.345026e+02	2.624470e+02	-3.351523e+02	2.947700e+02	-3.198505e+01	1.045797e+02	-6.514296e+01	-5.964934e+01	7.142167e+01	2.490003e+01	1.559711e+02	7.176433e+00	3.310743e+02	-4.657094e+01	-2.421812e+00
4.080000e+02	1.994262e+03	3.733316e+02	1.638854e+02	4.418548e+02	2.514005e+02	-3.015848e+02	2.884437e+02	-2.567381e+01	1.087956e+02	-6.132754e+01	-6.537359e+01	7.314168e+01	2.456000e+01	1.630753e+02	7.223248e+00	3.215287e+02	-5.260054e+01	-7.757266e+00
4.090000e+02	2.135157e+03	3.848694e+02	1.880493e+02	4.416515e+02	2.410486e+02	-2.753879e+02	2.756988e+02	-2.217878e+01	1.116189e+02	-6.273255e+01	-7.592957e+01	7.106496e+01	1.907780e+01	1.660723e+02	4.615616e+00	3.073163e+02	-5.763549e+01	-1.296575e+01
4.100000e+02	2.298612e+03	3.902049e+02	2.119140e+02	4.358259e+02	2.311278e+02	-2.628205e+02	2.554617e+02	-2.187813e+01	1.143918e+02	-6.994621e+01	-9.201594e+01	6.632351e+01	8.146604e+00	1.664860e+02	-2.108150e-01	2.897738e+02	-6.198077e+01	-1.882598e+01
4.110000e+02	2.476422e+03	3.906271e+02	2.378640e+02	4.268416e+02	2.211483e+02	-2.659247e+02	2.269682e+02	-2.481107e+01	1.184276e+02	-8.216815e+01	-1.130922e+02	6.107030e+01	-7.351785e+00	1.668106e+02	-6.096234e+00	2.698222e+02	-6.574329e+01	-2.563917e+01
4.120000e+02	2.657682e+03	3.879196e+02	2.674538e+02	4.169338e+02	2.103866e+02	-2.820692e+02	1.899439e+02	-3.066478e+01	1.246360e+02	-9.739960e+01	-1.373214e+02	5.790091e+01	-2.541362e+01	1.698085e+02	-1.136132e+01	2.475601e+02	-6.873923e+01	-3.318177e+01
4.130000e+02	2.830346e+03	3.828644e+02	3.000162e+02	4.071927e+02	1.977773e+02	-3.049066e+02	1.447564e+02	-3.880800e+01	1.332087e+02	-1.130573e+02	-1.619283e+02	5.895915e+01	-4.333445e+01	1.775528e+02	-1.426570e+01	2.220596e+02	-7.052995e+01	-4.082510e+01
4.140000e+02	2.982539e+03	3.741567e+02	3.319009e+02	3.968434e+02	1.818503e+02	-3.264236e+02	9.257738e+01	-4.838361e+01	1.434747e+02	-1.267998e+02	-1.838733e+02	6.505816e+01	-5.835946e+01	1.905717e+02	-1.358185e+01	1.915721e+02	-7.058380e+01	-4.772882e+01
4.150000e+02	3.103303e+03	3.584055e+02	3.568314e+02	3.831606e+02	1.609407e+02	-3.394339e+02	3.558781e+01	-5.846203e+01	1.539998e+02	-1.372728e+02	-2.006317e+02	7.518872e+01	-6.834930e+01	2.074707e+02	-9.068347e+00	1.542665e+02	-6.851057e+01	-5.300789e+01
4.160000e+02	3.183013e+03	3.313796e+02	3.674367e+02	3.622769e+02	1.337820e+02	-3.397392e+02	-2.283449e+01	-6.823255e+01	1.629254e+02	-1.445119e+02	-2.108311e+02	8.664571e+01	-7.225168e+01	2.252247e+02	-1.649233e+00	1.093674e+02	-6.428199e+01	-5.582365e+01
4.170000e+02	3.214044e+03	2.900177e+02	3.575024e+02	3.307331e+02	1.003266e+02	-3.272808e+02	-7.813074e+01	-7.717943e+01	1.684414e+02	-1.498730e+02	-2.145432e+02	9.574764e+01	-7.025337e+01	2.400370e+02	6.779459e+00	5.824520e+01	-5.835014e+01	-5.542303e+01
4.180000e+02	3.192029e+03	2.343217e+02	3.241578e+02	2.871976e+02	6.239789e+01	-3.059163e+02	-1.250035e+02	-8.517393e+01	1.692280e+02	-1.555128e+02	-2.131389e+02	9.888885e+01	-6.360652e+01	2.484207e+02	1.385236e+01	4.867767e+00	-5.160655e+01	-5.119641e+01
4.190000e+02	3.117488e+03	1.683222e+02	2.692293e+02	2.336129e+02	2.375571e+01	-2.819120e+02	-1.583704e+02	-9.242682e+01	1.647218e+02	-1.635833e+02	-2.087501e+02	9.356515e+01	-5.422092e+01	2.480939e+02	1.738304e+01	-4.479492e+01	-4.517553e+01	-4.280772e+01
4.200000e+02	2.997005e+03	9.977880e+01	1.993375e+02	1.752517e+02	-1.058567e+01	-2.616815e+02	-1.746389e+02	-9.929268e+01	1.551603e+02	-1.753749e+02	-2.035123e+02	7.907797e+01	-4.416143e+01	2.384284e+02	1.597140e+01	-8.433867e+01	-4.008948e+01	-3.038245e+01
4.210000e+02	2.843108e+03	3.885252e+01	1.247828e+02	1.196602e+02	-3.556017e+01	-2.495605e+02	-1.728531e+02	-1.059810e+02	1.414646e+02	-1.906638e+02	-1.988360e+02	5.678161e+01	-3.518538e+01	2.204319e+02	9.423073e+00	-1.088793e+02	-3.693636e+01	-1.466658e+01
4.220000e+02	2.672493e+03	-3.671061e+00	5.763739e+01	7.495591e+01	-4.726938e+01	-2.463627e+02	-1.552016e+02	-1.122819e+02	1.250738e+02	-2.074681e+02	-1.949538e+02	2.988738e+01	-2.842027e+01	1.964206e+02	-1.104934e+00	-1.165668e+02	-3.558986e+01	2.954542e+00
4.230000e+02	2.503087e+03	-1.803699e+01	9.610480e+00	4.814848e+01	-4.372211e+01	-2.491325e+02	-1.265864e+02	-1.174268e+02	1.078120e+02	-2.223212e+02	-1.908956e+02	2.917317e+00	-2.423638e+01	1.695764e+02	-1.326226e+01	-1.090250e+02	-3.512217e+01	2.064121e+01
4.240000e+02	2.351020e+03	3.256890e+00	-9.808718e+00	4.400236e+01	-2.487139e+01	-2.520578e+02	-9.335366e+01	-1.201690e+02	9.178472e+01	-2.310347e+02	-1.849021e+02	-1.908129e+01	-2.232285e+01	1.434979e+02	-2.394678e+01	-9.059887e+01	-3.395432e+01	3.646021e+01
4.250000e+02	2.228603e+03	6.469701e+01	5.403245e+00	6.460619e+01	7.912522e+00	-2.481178e+02	-6.166950e+01	-1.190848e+02	7.923855e+01	-2.297648e+02	-1.751289e+02	-3.144193e+01	-2.193055e+01	1.217565e+02	-2.995163e+01	-6.683847e+01	-3.022551e+01	4.880580e+01
4.260000e+02	2.143873e+03	1.673183e+02	5.729347e+01	1.094951e+02	5.255890e+01	-2.308772e+02	-3.618533e+01	-1.130067e+02	7.231975e+01	-2.160850e+02	-1.603995e+02	-3.075894e+01	-2.220503e+01	1.074357e+02	-2.867538e+01	-4.292939e+01	-2.228460e+01	5.672948e+01
4.270000e+02	2.101445e+03	3.084457e+02	1.440690e+02	1.760400e+02	1.068217e+02	-1.959241e+02	-1.948142e+01	-1.014350e+02	7.273319e+01	-1.897349e+02	-1.407517e+02	-1.556712e+01	-2.250634e+01	1.026785e+02	-1.871106e+01	-2.268591e+01	-9.155417e+00	6.005881e+01
4.280000e+02	2.103851e+03	4.815257e+02	2.606134e+02	2.598670e+02	1.684105e+02	-1.416927e+02	-1.238679e+01	-8.476885e+01	8.137845e+01	-1.528099e+02	-1.176114e+02	1.333701e+01	-2.261392e+01	1.083349e+02	-1.457472e-01	-8.345570e+00	9.167749e+00	5.926812e+01
4.290000e+02	2.152431e+03	6.760502e+02	3.990474e+02	3.551972e+02	2.347572e+02	-6.968554e+01	-1.484386e+01	-6.426792e+01	9.807669e+01	-1.093375e+02	-9.355717e+01	5.300666e+01	-2.274952e+01	1.238148e+02	2.551150e+01	-9.819117e-01	3.167653e+01	5.516081e+01
4.300000e+02	2.247213e+03	8.777040e+02	5.491180e+02	4.551061e+02	3.026149e+02	1.573755e+01	-2.674082e+01	-4.175622e+01	1.214795e+02	-6.439204e+01	-7.177583e+01	9.884334e+01	-2.341319e+01	1.472066e+02	5.572971e+01	-1.101835e+00	5.654838e+01	4.849533e+01
4.310000e+02	2.385834e+03	1.069004e+03	6.984902e+02	5.517809e+02	3.677422e+02	1.078344e+02	-4.820337e+01	-1.918425e+01	1.491931e+02	-2.303239e+01	-5.537875e+01	1.453446e+02	-2.509550e+01	1.756286e+02	8.753416e+01	-9.011418e+00	8.150740e+01	3.970703e+01
4.320000e+02	2.562113e+03	1.230761e+03	8.333185e+02	6.369042e+02	4.248905e+02	1.981653e+02	-7.918325e+01	1.788768e+00	1.780946e+02	1.063788e+01	-4.675068e+01	1.869434e+02	-2.797722e+01	2.057176e+02	1.180745e+02	-2.476426e+01	1.042358e+02	2.883972e+01
4.330000e+02	2.765091e+03	1.344552e+03	9.395465e+02	7.023167e+02	4.682211e+02	2.775385e+02	-1.186194e+02	2.005252e+01	2.047852e+02	3.408954e+01	-4.704993e+01	2.188219e+02	-3.173570e+01	2.341369e+02	1.450356e+02	-4.779563e+01	1.227444e+02	1.571532e+01
4.340000e+02	2.979193e+03	1.395965e+03	1.005087e+03	7.410437e+02	4.921612e+02	3.372589e+02	-1.637359e+02	3.508167e+01	2.261062e+02	4.660466e+01	-5.592155e+01	2.376289e+02	-3.553993e+01	2.580114e+02	1.668289e+02	-7.653437e+01	1.356462e+02	2.703208e-01
4.350000e+02	3.185688e+03	1.377879e+03	1.022464e+03	7.485808e+02	4.925584e+02	3.705693e+02	-2.100111e+02	4.678423e+01	2.396329e+02	4.917966e+01	-7.145367e+01	2.420281e+02	-3.824776e+01	2.752349e+02	1.825870e+02	-1.082893e+02	1.423076e+02	-1.708878e+01
4.360000e+02	3.365078e+03	1.292637e+03	9.909931e+02	7.240866e+02	4.678476e+02	3.739730e+02	-2.520193e+02	5.526583e+01	2.440446e+02	4.418452e+01	-9.040220e+01	2.329631e+02	-3.874384e+01	2.846223e+02	1.920328e+02	-1.395511e+02	1.428629e+02	-3.527869e+01
4.370000e+02	3.499726e+03	1.152161e+03	9.174833e+02	6.709816e+02	4.198494e+02	3.480208e+02	-2.848731e+02	6.063351e+01	2.392802e+02	3.485955e+01	-1.086974e+02	2.135061e+02	-3.630487e+01	2.858994e+02	1.953036e+02	-1.666390e+02	1.380955e+02	-5.259767e+01
4.380000e+02	3.576014e+03	9.756728e+02	8.149250e+02	5.965393e+02	3.538539e+02	2.972477e+02	-3.056642e+02	6.292776e+01	2.264353e+02	2.471699e+01	-1.221933e+02	1.882244e+02	-3.086767e+01	2.795507e+02	1.927994e+02	-1.864657e+02	1.292171e+02	-6.706152e+01
4.390000e+02	3.585661e+03	7.856308e+02	6.994556e+02	5.104181e+02	2.778295e+02	2.292357e+02	-3.142616e+02	6.220106e+01	2.074381e+02	1.692412e+01	-1.275282e+02	1.621611e+02	-2.310998e+01	2.665799e+02	1.850944e+02	-1.971638e+02	1.176084e+02	-7.691318e+01
4.400000e+02	3.526208e+03	6.031866e+02	5.866583e+02	4.225423e+02	2.008909e+02	1.531080e+02	-3.131271e+02	5.868636e+01	1.846188e+02	1.377169e+01	-1.228776e+02	1.397041e+02	-1.431718e+01	2.482650e+02	1.729227e+02	-1.984001e+02	1.046008e+02	-8.112596e+01
4.410000e+02	3.400977e+03	4.446269e+02	4.885162e+02	3.410563e+02	1.314474e+02	7.794867e+01	-3.062621e+02	5.295123e+01	1.603168e+02	1.634262e+01	-1.083583e+02	1.237082e+02	-6.078045e+00	2.259889e+02	1.572175e+02	-1.913353e+02	9.135482e+01	-7.971882e+01
4.420000e+02	3.218785e+03	3.197452e+02	4.119844e+02	2.710602e+02	7.558642e+01	1.158488e+01	-2.977828e+02	4.593670e+01	1.366328e+02	2.446211e+01	-8.593012e+01	1.151582e+02	9.681227e-02	2.011855e+02	1.391588e+02	-1.783031e+02	7.884018e+01	-7.377646e+01
4.430000e+02	2.993517e+03	2.322333e+02	3.593768e+02	2.144814e+02	3.617276e+01	-4.007914e+01	-2.907361e+02	3.883281e+01	1.153469e+02	3.693213e+01	-5.881268e+01	1.134463e+02	3.122701e+00	1.753819e+02	1.201773e+02	-1.623248e+02	6.787419e+01	-6.517878e+01
4.440000e+02	2.743370e+03	1.814175e+02	3.299863e+02	1.709412e+02	1.287708e+01	-7.325145e+01	-2.865817e+02	3.282126e+01	9.794163e+01	5.196491e+01	-3.061088e+01	1.170853e+02	2.562746e+00	1.502591e+02	1.018784e+02	-1.465682e+02	5.915402e+01	-5.614240e+01
4.450000e+02	2.489504e+03	1.643222e+02	3.219597e+02	1.390924e+02	3.016755e+00	-8.617421e+01	-2.853885e+02	2.878139e+01	8.562065e+01	6.767287e+01	-4.445139e+00	1.245121e+02	-1.322268e+00	1.276352e+02	8.587543e+01	-1.338185e+02	5.323940e+01	-4.872008e+01
4.460000e+02	2.253893e+03	1.772145e+02	3.335559e+02	1.178031e+02	2.834888e+00	-7.893858e+01	-2.864526e+02	2.707562e+01	7.923451e+01	8.247271e+01	1.764537e+01	1.346316e+02	-7.686408e+00	1.093000e+02	7.355696e+01	-1.260055e+02	5.048084e+01	-4.438564e+01
4.470000e+02	2.056475e+03	2.162623e+02	3.634037e+02	1.067552e+02	8.753657e+00	-5.322169e+01	-2.888994e+02	2.749565e+01	7.908550e+01	9.531305e+01	3.488931e+01	1.469029e+02	-1.531866e+01	9.669506e+01	6.583623e+01	-1.238394e+02	5.092502e+01	-4.377772e+01
4.480000e+02	1.912083e+03	2.774254e+02	4.099332e+02	1.063696e+02	1.822519e+01	-1.189590e+01	-2.919595e+02	2.938125e+01	8.466944e+01	1.057091e+02	4.758835e+01	1.609973e+02	-2.289728e+01	9.051178e+01	6.294632e+01	-1.266355e+02	5.424488e+01	-4.662229e+01
4.490000e+02	1.827881e+03	3.559827e+02	4.705035e+02	1.172761e+02	2.999999e+01	4.149536e+01	-2.948782e+02	3.185386e+01	9.447841e+01	1.136313e+02	5.669220e+01	1.762559e+02	-2.921715e+01	9.034667e+01	6.434353e+01	-1.324166e+02	5.973705e+01	-5.182243e+01
4.500000e+02	1.802129e+03	4.461180e+02	5.407783e+02	1.396785e+02	4.384860e+01	1.032829e+02	-2.966655e+02	3.406981e+01	1.060078e+02	1.193244e+02	6.333216e+01	1.912624e+02	-3.335883e+01	9.457154e+01	6.876538e+01	-1.383404e+02	6.640802e+01	-5.769406e+01
4.510000e+02	1.824810e+03	5.408608e+02	6.146880e+02	1.729226e+02	5.993615e+01	1.700542e+02	-2.959620e+02	3.540524e+01	1.160664e+02	1.231264e+02	6.846058e+01	2.037876e+02	-3.479563e+01	1.005316e+02	7.445434e+01	-1.414018e+02	7.314106e+01	-6.231707e+01
4.520000e+02	1.880145e+03	6.325255e+02	6.850362e+02	2.154130e+02	7.813346e+01	2.387462e+02	-2.911707e+02	3.552624e+01	1.213859e+02	1.253293e+02	7.266334e+01	2.111890e+02	-3.344381e+01	1.050820e+02	7.950902e+01	-1.392331e+02	7.890413e+01	-6.394938e+01
4.530000e+02	1.950451e+03	7.136607e+02	7.446082e+02	2.648648e+02	9.755051e+01	3.064890e+02	-2.808071e+02	3.435092e+01	1.193949e+02	1.260932e+02	7.613880e+01	2.111372e+02	-2.965391e+01	1.053446e+02	8.227810e+01	-1.307527e+02	8.293676e+01	-6.142195e+01
4.540000e+02	2.020346e+03	7.783901e+02	7.875369e+02	3.187629e+02	1.165017e+02	3.704072e+02	-2.638837e+02	3.195123e+01	1.089267e+02	1.254115e+02	7.879227e+01	2.023871e+02	-2.413457e+01	9.946038e+01	8.168771e+01	-1.164257e+02	8.485370e+01	-5.441779e+01
4.550000e+02	2.080195e+03	8.238276e+02	8.106256e+02	3.748565e+02	1.329590e+02	4.276235e+02	-2.401652e+02	2.845573e+01	9.060899e+01	1.231289e+02	8.038405e+01	1.852822e+02	-1.781142e+01	8.708694e+01	7.740802e+01	-9.803870e+01	8.463192e+01	-4.355959e+01
4.560000e+02	2.127969e+03	8.510515e+02	8.142661e+02	4.315148e+02	1.453393e+02	4.755926e+02	-2.102476e+02	2.399855e+01	6.677159e+01	1.190149e+02	8.067635e+01	1.617879e+02	-1.165250e+01	6.945928e+01	6.981558e+01	-7.808426e+01	8.249592e+01	-3.028703e+01
4.570000e+02	2.169083e+03	8.650459e+02	8.025681e+02	4.878020e+02	1.532763e+02	5.126639e+02	-1.755318e+02	1.872407e+01	4.087509e+01	1.128857e+02	7.953781e+01	1.350368e+02	-6.517657e+00	4.898153e+01	5.977467e+01	-5.901667e+01	7.875927e+01	-1.657238e+01
4.580000e+02	2.214363e+03	8.732383e+02	7.824201e+02	5.432061e+02	1.579431e+02	5.385788e+02	-1.381718e+02	1.282026e+01	1.663504e+01	1.047343e+02	7.697822e+01	1.085491e+02	-3.086226e+00	2.848488e+01	4.831589e+01	-4.268923e+01	7.369326e+01	-4.565982e+00
4.590000e+02	2.276685e+03	8.827884e+02	7.615110e+02	5.970735e+02	1.616255e+02	5.545607e+02	-1.009960e+02	6.535530e+00	-2.877583e+00	9.479687e+01	7.310510e+01	8.538379e+01	-1.877604e+00	1.040130e+01	3.631316e+01	-3.017965e+01	6.746941e+01	3.738369e+00
4.600000e+02	2.367116e+03	8.974447e+02	7.457850e+02	6.479399e+02	1.665738e+02	5.628007e+02	-6.730435e+01	1.461332e-01	-1.588780e+01	8.349449e+01	6.801917e+01	6.746058e+01	-3.322608e+00	-3.880970e+00	2.425088e+01	-2.200417e+01	6.017795e+01	6.766227e+00
4.610000e+02	2.491464e+03	9.152264e+02	7.371912e+02	6.930489e+02	1.735720e+02	5.654325e+02	-4.043634e+01	-6.122506e+00	-2.215815e+01	7.124357e+01	6.169561e+01	5.520795e+01	-7.807411e+00	-1.429486e+01	1.214183e+01	-1.852010e+01	5.188926e+01	3.546932e+00
4.620000e+02	2.648108e+03	9.280863e+02	7.326581e+02	7.283446e+02	1.809126e+02	5.633867e+02	-2.311533e+01	-1.217705e+01	-2.281078e+01	5.821878e+01	5.391477e+01	4.758507e+01	-1.562478e+01	-2.195428e+01	-3.842401e-01	-2.022840e+01	4.271702e+01	-6.163372e+00
4.630000e+02	2.827674e+03	9.239914e+02	7.248455e+02	7.490691e+02	1.843864e+02	5.556703e+02	-1.674021e+01	-1.808091e+01	-1.984839e+01	4.421161e+01	4.429616e+01	4.244415e+01	-2.682652e+01	-2.867834e+01	-1.384448e+01	-2.776465e+01	3.285906e+01	-2.181200e+01
4.640000e+02	3.014758e+03	8.907836e+02	7.045020e+02	7.508247e+02	1.784595e+02	5.395149e+02	-2.090144e+01	-2.398689e+01	-1.555237e+01	2.870682e+01	3.244810e+01	3.714135e+01	-4.104239e+01	-3.634895e+01	-2.858632e+01	-4.156496e+01	2.261273e+01	-4.205188e+01
4.650000e+02	3.191256e+03	8.203025e+02	6.635275e+02	7.306967e+02	1.582234e+02	5.114748e+02	-3.336495e+01	-2.999738e+01	-1.192779e+01	1.119015e+01	1.818666e+01	2.925975e+01	-5.737042e+01	-4.629714e+01	-4.449318e+01	-6.140099e+01	1.237063e+01	-6.485281e+01
4.660000e+02	3.340367e+03	7.110699e+02	5.975095e+02	6.879263e+02	1.212806e+02	4.690918e+02	-5.059541e+01	-3.602539e+01	-1.031247e+01	-8.441469e+00	1.730822e+00	1.727145e+01	-7.442634e+01	-5.888551e+01	-6.082508e+01	-8.607656e+01	2.597342e+00	-8.774915e+01
4.670000e+02	3.450023e+03	5.685134e+02	5.067910e+02	6.238023e+02	6.872521e+01	4.124011e+02	-6.866965e+01	-4.174450e+01	-1.120323e+01	-2.958200e+01	-1.622547e+01	9.592685e-01	-9.057362e+01	-7.338867e+01	-7.627411e+01	-1.135071e+02	-6.217268e+00	-1.082125e+02
4.680000e+02	3.514677e+03	4.029082e+02	3.958813e+02	5.408491e+02	4.815459e+00	3.445543e+02	-8.427487e+01	-4.667435e+01	-1.429464e+01	-5.091053e+01	-3.461919e+01	-1.853081e+01	-1.042762e+02	-8.818754e+01	-8.923947e+01	-1.412028e+02	-1.362576e+01	-1.240861e+02
4.690000e+02	3.535026e+03	2.262534e+02	2.718196e+02	4.418091e+02	-6.442330e+01	2.712063e+02	-9.546951e+01	-5.037001e+01	-1.868166e+01	-7.071038e+01	-5.227689e+01	-3.902202e+01	-1.144612e+02	-1.012061e+02	-9.823787e+01	-1.669574e+02	-1.929357e+01	-1.339799e+02
4.700000e+02	3.516037e+03	4.960791e+01	1.424625e+02	3.290820e+02	-1.329483e+02	1.988763e+02	-1.020018e+02	-5.261586e+01	-2.314824e+01	-8.736828e+01	-6.822473e+01	-5.790064e+01	-1.207753e+02	-1.104510e+02	-1.023043e+02	-1.894317e+02	-2.304362e+01	-1.375202e+02
4.710000e+02	3.464353e+03	-1.181471e+02	1.543131e+01	2.050430e+02	-1.960177e+02	1.329582e+02	-1.051592e+02	-5.351423e+01	-2.645460e+01	-9.980806e+01	-8.191556e+01	-7.274842e+01	-1.236554e+02	-1.144880e+02	-1.012403e+02	-2.083714e+02	-2.485550e+01	-1.353780e+02
4.720000e+02	3.386268e+03	-2.701546e+02	-1.021703e+02	7.311494e+01	-2.506478e+02	7.617684e+01	-1.072721e+02	-5.341573e+01	-2.755086e+01	-1.076520e+02	-9.327148e+01	-8.178709e+01	-1.242004e+02	-1.127158e+02	-9.563304e+01	-2.243828e+02	-2.482517e+01	-1.290633e+02
4.730000e+02	3.287120e+03	-4.008514e+02	-2.037179e+02	-6.104280e+01	-2.953038e+02	2.805358e+01	-1.110549e+02	-5.272926e+01	-2.568355e+01	-1.110575e+02	-1.025248e+02	-8.401180e+01	-1.238854e+02	-1.053722e+02	-8.666117e+01	-2.384009e+02	-2.311640e+01	-1.205368e+02
4.740000e+02	3.172138e+03	-5.055752e+02	-2.832909e+02	-1.890410e+02	-3.292903e+02	-1.449447e+01	-1.189411e+02	-5.171608e+01	-2.041051e+01	-1.103563e+02	-1.099361e+02	-7.905077e+01	-1.241902e+02	-9.330466e+01	-7.577733e+01	-2.511062e+02	-1.993982e+01	-1.117431e+02
4.750000e+02	3.048090e+03	-5.808737e+02	-3.364008e+02	-3.004673e+02	-3.523287e+02	-5.569580e+01	-1.324908e+02	-5.037436e+01	-1.157619e+01	-1.057187e+02	-1.155246e+02	-6.692050e+01	-1.262213e+02	-7.761707e+01	-6.437999e+01	-2.625257e+02	-1.557534e+01	-1.041914e+02
4.760000e+02	2.924609e+03	-6.251408e+02	-3.609438e+02	-3.846886e+02	-3.645163e+02	-9.910423e+01	-1.518916e+02	-4.846090e+01	6.968530e-01	-9.703355e+01	-1.189341e+02	-4.787578e+01	-1.303954e+02	-5.933709e+01	-5.355877e+01	-2.719118e+02	-1.042000e+01	-9.868685e+01
4.770000e+02	2.814222e+03	-6.388245e+02	-3.577692e+02	-4.330697e+02	-3.664956e+02	-1.459512e+02	-1.755702e+02	-4.561939e+01	1.597743e+01	-8.406012e+01	-1.194874e+02	-2.246324e+01	-1.362429e+02	-3.921883e+01	-4.394990e+01	-2.778379e+02	-5.019076e+00	-9.526824e+01
4.780000e+02	2.730725e+03	-6.236974e+02	-3.303738e+02	-4.407112e+02	-3.594679e+02	-1.941307e+02	-1.999852e+02	-4.153936e+01	3.348404e+01	-6.675238e+01	-1.163906e+02	8.271112e+00	-1.423829e+02	-1.772130e+01	-3.569961e+01	-2.783666e+02	-3.864563e-02	-9.333948e+01
4.790000e+02	2.686322e+03	-5.813724e+02	-2.837108e+02	-4.070528e+02	-3.447998e+02	-2.381433e+02	-2.197355e+02	-3.607782e+01	5.209376e+01	-4.557436e+01	-1.089871e+02	4.259737e+01	-1.467062e+02	4.878121e+00	-2.851756e+01	-2.711873e+02	3.835681e+00	-9.192521e+01
4.800000e+02	2.688653e+03	-5.118867e+02	-2.226405e+02	-3.352418e+02	-3.232916e+02	-2.701212e+02	-2.281194e+02	-2.931831e+01	7.045432e+01	-2.163857e+01	-9.695328e+01	7.813427e+01	-1.467609e+02	2.832633e+01	-2.180125e+01	-2.537371e+02	6.050132e+00	-8.995376e+01
4.810000e+02	2.738918e+03	-4.133105e+02	-1.507956e+02	-2.307218e+02	-2.944900e+02	-2.817621e+02	-2.181718e+02	-2.158096e+01	8.720021e+01	3.404332e+00	-8.037125e+01	1.121857e+02	-1.402730e+02	5.228364e+01	-1.480958e+01	-2.234186e+02	6.330319e+00	-8.648156e+01
4.820000e+02	2.831903e+03	-2.828203e+02	-7.041158e+01	-9.975369e+01	-2.565044e+02	-2.666548e+02	-1.840140e+02	-1.340778e+01	1.012127e+02	2.768434e+01	-5.967413e+01	1.423051e+02	-1.256687e+02	7.631012e+01	-6.851413e+00	-1.780216e+02	4.767089e+00	-8.081594e+01
4.830000e+02	2.957852e+03	-1.188134e+02	1.689518e+01	5.156699e+01	-2.065565e+02	-2.222425e+02	-1.221619e+02	-5.532215e+00	1.118373e+02	4.952140e+01	-3.550138e+01	1.668912e+02	-1.024426e+02	9.994948e+01	2.561125e+00	-1.163394e+02	1.810489e+00	-7.254417e+01
4.840000e+02	3.105417e+03	7.702176e+01	1.089913e+02	2.176494e+02	-1.420967e+02	-1.507062e+02	-3.238713e+01	1.173778e+00	1.189988e+02	6.778855e+01	-8.519073e+00	1.856138e+02	-7.125340e+01	1.228790e+02	1.364990e+01	-3.881070e+01	-1.810998e+00	-6.151229e+01
4.850000e+02	3.264557e+03	2.987883e+02	2.025364e+02	3.933686e+02	-6.198994e+01	-5.844105e+01	8.212215e+01	5.779635e+00	1.232188e+02	8.212036e+01	2.074517e+01	1.995597e+02	-3.372728e+01	1.450868e+02	2.643450e+01	5.206824e+01	-5.188123e+00	-4.780102e+01
4.860000e+02	3.428462e+03	5.370806e+02	2.932529e+02	5.740518e+02	3.277179e+01	4.561407e+01	2.152688e+02	7.387897e+00	1.255885e+02	9.290881e+01	5.200975e+01	2.111096e+02	7.943413e+00	1.670427e+02	4.091425e+01	1.517646e+02	-7.282044e+00	-3.172144e+01
4.870000e+02	3.594113e+03	7.808428e+02	3.770468e+02	7.556987e+02	1.391123e+02	1.520291e+02	3.589264e+02	5.206369e+00	1.277465e+02	1.010856e+02	8.525317e+01	2.236260e+02	5.145590e+01	1.898281e+02	5.730454e+01	2.542024e+02	-6.906670e+00	-1.381842e+01
4.880000e+02	3.761628e+03	1.019329e+03	4.512983e+02	9.352874e+02	2.525374e+02	2.524563e+02	5.038324e+02	-1.423937e+00	1.318519e+02	1.077458e+02	1.206133e+02	2.410219e+02	9.476501e+01	2.151728e+02	7.622001e+01	3.525829e+02	-2.689693e+00	5.150553e+00
4.890000e+02	3.932864e+03	1.243166e+03	5.154956e+02	1.110772e+03	3.679900e+02	3.402376e+02	6.403047e+02	-1.303709e+01	1.404652e+02	1.137194e+02	1.581824e+02	2.672219e+02	1.362895e+02	2.453280e+02	9.868928e+01	4.402899e+02	6.884616e+00	2.428517e+01
4.900000e+02	4.109809e+03	1.444192e+03	5.707402e+02	1.280457e+03	4.804300e+02	4.101919e+02	7.588619e+02	-3.003899e+01	1.562236e+02	1.192305e+02	1.977499e+02	3.054935e+02	1.749589e+02	2.827013e+02	1.259270e+02	5.116583e+02	2.325044e+01	4.265332e+01
4.910000e+02	4.293126e+03	1.614490e+03	6.183014e+02	1.441774e+03	5.849272e+02	4.582190e+02	8.509756e+02	-5.262692e+01	1.812499e+02	1.237767e+02	2.385709e+02	3.576539e+02	2.101451e+02	3.292270e+02	1.588710e+02	5.624933e+02	4.732880e+01	5.940447e+01
4.920000e+02	4.481055e+03	1.745515e+03	6.579436e+02	1.589920e+03	6.763929e+02	4.813702e+02	9.100798e+02	-8.059227e+01	2.163640e+02	1.262916e+02	2.792289e+02	4.232485e+02	2.415166e+02	3.855349e+02	1.975913e+02	5.903242e+02	7.898467e+01	7.384023e+01
4.930000e+02	4.668707e+03	1.828015e+03	6.868854e+02	1.717003e+03	7.493015e+02	4.785881e+02	9.326604e+02	-1.130359e+02	2.603223e+02	1.255506e+02	3.176286e+02	4.989094e+02	2.688312e+02	4.501107e+02	2.407490e+02	5.944251e+02	1.165707e+02	8.542344e+01
4.940000e+02	4.847848e+03	1.853003e+03	6.999432e+02	1.812240e+03	7.977444e+02	4.517085e+02	9.189860e+02	-1.481087e+02	3.093922e+02	1.206676e+02	3.511142e+02	5.781692e+02	2.916833e+02	5.187372e+02	2.853101e+02	5.756311e+02	1.567805e+02	9.374925e+01
4.950000e+02	5.007316e+03	1.813509e+03	6.908576e+02	1.863361e+03	8.159594e+02	4.059966e+02	8.730504e+02	-1.829421e+02	3.575423e+02	1.114850e+02	3.767086e+02	6.519701e+02	3.092623e+02	5.845229e+02	3.266678e+02	5.359790e+02	1.949593e+02	9.852789e+01
4.960000e+02	5.134354e+03	1.706576e+03	6.543027e+02	1.858976e+03	7.992493e+02	3.496585e+02	8.016192e+02	-2.139078e+02	3.973506e+02	9.869262e+01	3.914839e+02	7.099518e+02	3.202349e+02	6.387021e+02	3.592277e+02	4.782491e+02	2.258673e+02	9.961877e+01
4.970000e+02	5.216938e+03	1.534986e+03	5.878482e+02	1.791346e+03	7.450632e+02	2.923236e+02	7.127255e+02	-2.372367e+02	4.214833e+02	8.363355e+01	3.930731e+02	7.423542e+02	3.228789e+02	6.721596e+02	3.773781e+02	4.055531e+02	2.447268e+02	9.711517e+01
4.980000e+02	5.246812e+03	1.308310e+03	4.932312e+02	1.658862e+03	6.539969e+02	2.430325e+02	6.142378e+02	-2.498664e+02	4.243623e+02	6.788664e+01	3.802803e+02	7.421160e+02	3.155243e+02	6.773599e+02	3.766470e+02	3.211388e+02	2.482736e+02	9.143657e+01
4.990000e+02	5.222324e+03	1.042979e+03	3.765994e+02	1.467612e+03	5.305139e+02	2.084810e+02	5.130271e+02	-2.502500e+02	4.035400e+02	5.281041e+01	3.536407e+02	7.066011e+02	2.972162e+02	6.501766e+02	3.547704e+02	2.285028e+02	2.355190e+02	8.337084e+01
5.000000e+02	5.149899e+03	7.611590e+02	2.477418e+02	1.231543e+03	3.832124e+02	1.920554e+02	4.148610e+02	-2.388243e+02	3.603748e+02	3.923136e+01	3.157020e+02	6.384309e+02	2.683682e+02	5.910975e+02	3.123951e+02	1.317240e+02	2.080110e+02	7.402825e+01
5.010000e+02	5.043193e+03	4.883554e+02	1.185947e+02	9.710262e+02	2.244544e+02	1.937732e+02	3.247058e+02	-2.179405e+02	2.998264e+02	2.737445e+01	2.708109e+02	5.451419e+02	2.311214e+02	5.054529e+02	2.532052e+02	3.575565e+01	1.695286e+02	6.470682e+01
5.020000e+02	4.919882e+03	2.499798e+02	1.422245e+00	7.100106e+02	6.919767e+01	2.108832e+02	2.469275e+02	-1.912630e+02	2.294689e+02	1.701049e+01	2.243509e+02	4.377428e+02	1.892039e+02	4.025964e+02	1.834017e+02	-5.364475e+01	1.252973e+02	5.669941e+01
5.030000e+02	4.797064e+03	6.743678e+01	-9.295909e+01	4.723272e+02	-6.699961e+01	2.387777e+02	1.850518e+02	-1.628534e+02	1.580192e+02	7.701651e+00	1.816070e+02	3.285746e+02	1.472862e+02	2.942543e+02	1.106207e+02	-1.305350e+02	8.093350e+01	5.108311e+01
5.040000e+02	4.686952e+03	-4.544192e+01	-1.566588e+02	2.779819e+02	-1.705662e+02	2.719682e+02	1.411401e+02	-1.362680e+02	9.376065e+01	-9.908591e-01	1.466257e+02	2.290381e+02	1.100315e+02	1.924445e+02	4.253226e+01	-1.898642e+02	4.137741e+01	4.852686e+01
5.050000e+02	4.594356e+03	-8.476296e+01	-1.857564e+02	1.402809e+02	-2.325566e+02	3.050235e+02	1.151813e+02	-1.139543e+02	4.318563e+01	-9.414517e+00	1.214634e+02	1.477259e+02	8.115528e+01	1.074182e+02	-1.455180e+01	-2.286347e+02	1.006385e+01	4.914778e+01
5.060000e+02	4.516667e+03	-5.712068e+01	-1.808342e+02	6.437649e+01	-2.506062e+02	3.334135e+02	1.049685e+02	-9.707038e+01	1.006672e+01	-1.783548e+01	1.060567e+02	8.930210e+01	6.277179e+01	4.601767e+01	-5.672588e+01	-2.466597e+02	-1.149941e+01	5.244651e+01
5.070000e+02	4.446012e+03	2.187330e+01	-1.469168e+02	4.739598e+01	-2.295270e+02	3.541567e+02	1.066905e+02	-8.565817e+01	-4.947128e+00	-2.647477e+01	9.867617e+01	5.423681e+01	5.516166e+01	1.072275e+01	-8.295545e+01	-2.465520e+02	-2.368916e+01	5.735094e+01
5.080000e+02	4.372643e+03	1.308141e+02	-9.273012e+01	7.992547e+01	-1.802167e+02	3.661227e+02	1.160836e+02	-7.899254e+01	-4.195156e+00	-3.549529e+01	9.670611e+01	3.930268e+01	5.692731e+01	-4.757210e-01	-9.488289e+01	-2.328916e+02	-2.832916e+01	6.238259e+01
5.090000e+02	4.288582e+03	2.468045e+02	-2.924895e+01	1.483831e+02	-1.170787e+02	3.698941e+02	1.296876e+02	-7.592718e+01	7.624974e+00	-4.491972e+01	9.741821e+01	3.863307e+01	6.540754e+01	6.622712e+00	-9.608102e+01	-2.108708e+02	-2.802389e+01	6.592711e+01
5.100000e+02	4.190803e+03	3.498764e+02	3.232307e+01	2.377381e+02	-5.465260e+01	3.672392e+02	1.456895e+02	-7.515079e+01	2.447320e+01	-5.452636e+01	9.850645e+01	4.509827e+01	7.721749e+01	2.380955e+01	-9.099959e+01	-1.849264e+02	-2.546932e+01	6.655261e+01
5.110000e+02	4.083422e+03	4.265040e+02	8.275781e+01	3.340454e+02	-4.418614e+00	3.603934e+02	1.640159e+02	-7.536174e+01	4.018668e+01	-6.380141e+01	9.832646e+01	5.174765e+01	8.882852e+01	4.224985e+01	-8.390319e+01	-1.578525e+02	-2.291611e+01	6.329725e+01
5.120000e+02	3.978325e+03	4.713795e+02	1.166382e+02	4.263192e+02	2.732705e+01	3.513939e+02	1.856554e+02	-7.541104e+01	4.965868e+01	-7.200494e+01	9.592124e+01	5.306538e+01	9.713685e+01	5.428104e+01	-7.805952e+01	-1.306600e+02	-2.187941e+01	5.585581e+01
5.130000e+02	3.893602e+03	4.871305e+02	1.333027e+02	5.074053e+02	4.001265e+01	3.416505e+02	2.114979e+02	-7.443891e+01	4.972390e+01	-7.834987e+01	9.094859e+01	4.581348e+01	9.995937e+01	5.482424e+01	-7.533026e+01	-1.031380e+02	-2.309554e+01	4.462987e+01
5.140000e+02	3.849588e+03	4.823405e+02	1.366466e+02	5.737988e+02	3.777759e+01	3.318226e+02	2.411789e+02	-7.198014e+01	3.956798e+01	-8.223286e+01	8.357595e+01	2.931573e+01	9.636122e+01	4.210088e+01	-7.618547e+01	-7.479694e+01	-2.665853e+01	3.064738e+01
5.150000e+02	3.863248e+03	4.688092e+02	1.339119e+02	6.247388e+02	2.744718e+01	3.219924e+02	2.724432e+02	-6.798562e+01	2.061266e+01	-8.342396e+01	7.434742e+01	5.174688e+00	8.671887e+01	1.754598e+01	-8.004517e+01	-4.575114e+01	-3.224308e+01	1.538483e+01
5.160000e+02	3.942705e+03	4.591366e+02	1.338964e+02	6.612109e+02	1.632803e+01	3.120891e+02	3.013877e+02	-6.272609e+01	-4.027314e+00	-8.212904e+01	6.401730e+01	-2.342999e+01	7.248749e+01	-1.496000e+01	-8.577441e+01	-1.715173e+01	-3.932831e+01	5.314763e-01
5.170000e+02	4.084120e+03	4.653046e+02	1.450740e+02	6.854541e+02	1.061781e+01	3.024777e+02	3.236274e+02	-5.659498e+01	-3.032497e+01	-7.888362e+01	5.338282e+01	-5.261342e+01	5.575201e+01	-5.024445e+01	-9.213609e+01	9.014359e+00	-4.735636e+01	-1.227019e+01
5.180000e+02	4.272446e+03	4.981893e+02	1.739816e+02	7.011455e+02	1.486618e+01	2.945428e+02	3.360407e+02	-4.987739e+01	-5.415570e+01	-7.430184e+01	4.318486e+01	-7.858002e+01	3.873389e+01	-8.303121e+01	-9.804331e+01	3.066900e+01	-5.578085e+01	-2.167664e+01
5.190000e+02	4.485874e+03	5.673260e+02	2.240364e+02	7.138596e+02	3.240253e+01	2.910041e+02	3.384274e+02	-4.257400e+01	-7.199254e+01	-6.876754e+01	3.412974e+01	-9.818601e+01	2.343635e+01	-1.088796e+02	-1.025390e+02	4.660521e+01	-6.398437e+01	-2.685140e+01
5.200000e+02	4.702052e+03	6.801984e+02	2.948621e+02	7.310657e+02	6.620623e+01	2.956933e+02	3.343455e+02	-3.435263e+01	-8.139797e+01	-6.219011e+01	2.701452e+01	-1.092354e+02	1.152826e+01	-1.247219e+02	-1.045396e+02	5.724426e+01	-7.108145e+01	-2.758799e+01
5.210000e+02	4.903351e+03	8.408589e+02	3.822301e+02	7.611113e+02	1.195576e+02	3.126879e+02	3.306368e+02	-2.465541e+01	-8.127615e+01	-5.393633e+01	2.285833e+01	-1.105571e+02	4.434696e+00	-1.289809e+02	-1.024745e+02	6.485023e+01	-7.567166e+01	-2.431597e+01
5.220000e+02	5.079133e+03	1.048439e+03	4.787305e+02	8.112602e+02	1.960390e+02	3.449977e+02	3.356694e+02	-1.293420e+01	-7.187141e+01	-4.299362e+01	2.291365e+01	-1.019309e+02	3.497027e+00	-1.213476e+02	-9.400216e+01	7.309218e+01	-7.565081e+01	-1.798678e+01
5.230000e+02	5.224824e+03	1.296510e+03	5.751671e+02	8.855107e+02	2.989065e+02	3.932718e+02	3.568659e+02	1.058151e+00	-5.451990e+01	-2.834186e+01	2.848034e+01	-8.391998e+01	1.004251e+01	-1.023579e+02	-7.596867e+01	8.610487e+01	-6.819834e+01	-9.871601e+00
5.240000e+02	5.339385e+03	1.574012e+03	6.624109e+02	9.831709e+02	4.302366e+02	4.550667e+02	3.984074e+02	1.701190e+01	-3.120553e+01	-9.441049e+00	4.054833e+01	-5.765860e+01	2.527220e+01	-7.293485e+01	-4.470377e+01	1.073717e+02	-5.001831e+01	-1.326933e+00
5.250000e+02	5.423543e+03	1.867665e+03	7.332182e+02	1.098866e+03	5.903391e+02	5.250135e+02	4.599439e+02	3.391884e+01	-4.033264e+00	1.329827e+01	5.939870e+01	-2.465398e+01	4.999213e+01	-3.406068e+01	3.359099e+00	1.387786e+02	-1.782502e+01	6.418513e+00
5.260000e+02	5.480343e+03	2.165028e+03	7.834977e+02	1.224010e+03	7.776788e+02	5.958583e+02	5.367426e+02	5.008910e+01	2.522453e+01	3.820557e+01	8.434213e+01	1.334080e+01	8.431260e+01	1.331114e+01	7.086775e+01	1.800856e+02	3.103541e+01	1.242578e+01
5.270000e+02	5.517701e+03	2.456984e+03	8.127493e+02	1.349169e+03	9.891619e+02	6.600266e+02	6.211751e+02	6.333335e+01	5.537036e+01	6.233211e+01	1.137440e+02	5.436886e+01	1.274718e+02	6.809649e+01	1.587570e+02	2.289171e+02	9.800251e+01	1.615467e+01
5.280000e+02	5.550977e+03	2.738780e+03	8.237623e+02	1.466506e+03	1.220399e+03	7.112355e+02	7.049864e+02	7.129157e+01	8.576005e+01	8.181638e+01	1.453862e+02	9.628456e+01	1.778898e+02	1.287880e+02	2.657156e+02	2.812427e+02	1.829277e+02	1.753244e+01
5.290000e+02	5.603068e+03	3.009400e+03	8.219234e+02	1.571584e+03	1.465610e+03	7.457691e+02	7.815854e+02	7.187575e+01	1.160814e+02	9.264816e+01	1.770837e+02	1.368535e+02	2.334564e+02	1.932259e+02	3.880942e+02	3.322387e+02	2.839953e+02	1.699011e+01
5.300000e+02	5.700563e+03	3.269789e+03	8.144907e+02	1.664160e+03	1.717158e+03	7.632103e+02	8.476517e+02	6.377269e+01	1.460786e+02	9.171959e+01	2.073609e+02	1.740252e+02	2.919506e+02	2.586146e+02	5.202956e+02	3.773572e+02	3.978983e+02	1.545771e+01
5.310000e+02	5.866635e+03	3.520780e+03	8.099511e+02	1.747907e+03	1.965049e+03	7.665806e+02	9.036326e+02	4.691268e+01	1.753673e+02	7.790083e+01	2.359389e+02	2.063552e+02	3.514335e+02	3.218495e+02	6.555158e+02	4.133743e+02	5.201255e+02	1.429554e+01
5.320000e+02	6.113206e+03	3.761544e+03	8.173077e+02	1.829283e+03	2.196903e+03	7.619041e+02	9.531012e+02	2.276219e+01	2.034041e+02	5.277156e+01	2.638208e+02	2.334132e+02	4.104599e+02	3.800520e+02	7.865833e+02	4.391494e+02	6.452014e+02	1.513523e+01
5.330000e+02	6.435703e+03	3.989030e+03	8.450395e+02	1.915923e+03	2.398796e+03	7.572646e+02	1.001326e+03	-5.713791e+00	2.295696e+02	2.066009e+01	2.928828e+02	2.559433e+02	4.680266e+02	4.310868e+02	9.066353e+02	4.558678e+02	7.668060e+02	1.961583e+01
5.340000e+02	6.812762e+03	4.198423e+03	8.996506e+02	2.015014e+03	2.556987e+03	7.614999e+02	1.053649e+03	-3.451085e+01	2.532639e+02	-1.216725e+01	3.250499e+02	2.756074e+02	5.232717e+02	4.738290e+02	1.009494e+03	4.666614e+02	8.778566e+02	2.902809e+01
5.350000e+02	7.211116e+03	4.384309e+03	9.840537e+02	2.132066e+03	2.660148e+03	7.827961e+02	1.114258e+03	-5.941401e+01	2.739349e+02	-3.901308e+01	3.613075e+02	2.943358e+02	5.750425e+02	5.080706e+02	1.089796e+03	4.757074e+02	9.707460e+02	4.392312e+01
5.360000e+02	7.593689e+03	4.542036e+03	1.096311e+03	2.270298e+03	2.701498e+03	8.274989e+02	1.185703e+03	-7.698020e+01	2.910366e+02	-5.449955e+01	4.008980e+02	3.135174e+02	6.215201e+02	5.341394e+02	1.143073e+03	4.870891e+02	1.037927e+03	6.379184e+01
5.370000e+02	7.927677e+03	4.668787e+03	1.229279e+03	2.430533e+03	2.680213e+03	8.993811e+02	1.269084e+03	-8.535835e+01	3.039908e+02	-5.597442e+01	4.410335e+02	3.333750e+02	6.601013e+02	5.524429e+02	1.165981e+03	5.037839e+02	1.072883e+03	8.695288e+01
5.380000e+02	8.189813e+03	4.763977e+03	1.371449e+03	2.611267e+03	2.601789e+03	9.993890e+02	1.364525e+03	-8.466327e+01	3.122323e+02	-4.409496e+01	4.773015e+02	3.528010e+02	6.876722e+02	5.631718e+02	1.156735e+03	5.270727e+02	1.071301e+03	1.107637e+02
5.390000e+02	8.367649e+03	4.828784e+03	1.508889e+03	2.808483e+03	2.477303e+03	1.125677e+03	1.471394e+03	-7.677873e+01	3.153570e+02	-2.242658e+01	5.046901e+02	3.697097e+02	7.012698e+02	5.662896e+02	1.115640e+03	5.564664e+02	1.032093e+03	1.321711e+02
5.400000e+02	8.457652e+03	4.864886e+03	1.627827e+03	3.015033e+03	2.321694e+03	1.273678e+03	1.587937e+03	-6.468003e+01	3.132999e+02	3.732992e+00	5.189063e+02	3.817136e+02	6.989506e+02	5.617581e+02	1.045445e+03	5.900325e+02	9.578751e+02	1.484696e+02
5.410000e+02	8.462126e+03	4.872783e+03	1.717249e+03	3.219869e+03	2.151279e+03	1.436140e+03	1.710387e+03	-5.153550e+01	3.064171e+02	2.883135e+01	5.175196e+02	3.867846e+02	6.805502e+02	5.498153e+02	9.512876e+02	6.248723e+02	8.546942e+02	1.580027e+02
5.420000e+02	8.386979e+03	4.850415e+03	1.770893e+03	3.407787e+03	1.980785e+03	1.603320e+03	1.832060e+03	-3.989899e+01	2.953809e+02	4.832384e+01	5.005059e+02	3.836044e+02	6.479983e+02	5.310969e+02	8.401345e+02	6.575208e+02	7.310433e+02	1.605242e+02
5.430000e+02	8.241256e+03	4.792858e+03	1.788122e+03	3.560474e+03	1.820429e+03	1.763719e+03	1.943135e+03	-3.123277e+01	2.809048e+02	5.937133e+01	4.700032e+02	3.715095e+02	6.049898e+02	5.064962e+02	7.198273e+02	6.841819e+02	5.964695e+02	1.570506e+02
5.440000e+02	8.038025e+03	4.693595e+03	1.773410e+03	3.659236e+03	1.673879e+03	1.905564e+03	2.031684e+03	-2.585127e+01	2.634283e+02	6.090087e+01	4.294151e+02	3.501809e+02	5.560646e+02	4.768302e+02	5.979990e+02	7.008932e+02	4.602156e+02	1.492641e+02
5.450000e+02	7.795197e+03	4.547159e+03	1.734507e+03	3.688997e+03	1.538022e+03	2.018826e+03	2.085980e+03	-2.321866e+01	2.429385e+02	5.320977e+01	3.822694e+02	3.193673e+02	5.054177e+02	4.425154e+02	4.811879e+02	7.038194e+02	3.302801e+02	1.387349e+02
5.460000e+02	7.534854e+03	4.352321e+03	1.679806e+03	3.642402e+03	1.405022e+03	2.097130e+03	2.097528e+03	-2.242308e+01	2.190487e+02	3.742364e+01	3.313241e+02	2.788956e+02	4.559095e+02	4.034809e+02	3.743804e+02	6.898537e+02	2.130566e+02	1.263161e+02
5.470000e+02	7.280413e+03	4.114657e+03	1.615869e+03	3.522575e+03	1.266312e+03	2.138801e+03	2.063819e+03	-2.261299e+01	1.913284e+02	1.509862e+01	2.782804e+02	2.290401e+02	4.086825e+02	3.594421e+02	2.810262e+02	6.575506e+02	1.134321e+02	1.119711e+02
5.480000e+02	7.052245e+03	3.847660e+03	1.546228e+03	3.343534e+03	1.117180e+03	2.146654e+03	1.989848e+03	-2.321540e+01	1.597631e+02	-1.187520e+01	2.241697e+02	1.711033e+02	3.635395e+02	3.104731e+02	2.033721e+02	6.081837e+02	3.502075e+01	9.507323e+01
5.490000e+02	6.863364e+03	3.572103e+03	1.472185e+03	3.128194e+03	9.601570e+02	2.126793e+03	1.887812e+03	-2.385048e+01	1.251700e+02	-4.109070e+01	1.701791e+02	1.079298e+02	3.198984e+02	2.576490e+02	1.428382e+02	5.465128e+02	-1.980361e+01	7.498829e+01
5.500000e+02	6.717058e+03	3.313847e+03	1.395462e+03	2.904740e+03	8.056809e+02	2.087153e+03	1.774973e+03	-2.398853e+01	8.942615e+01	-6.933680e+01	1.184877e+02	4.407791e+01	2.778737e+02	2.034641e+02	1.001889e+02	4.807581e+02	-5.021730e+01	5.163117e+01
5.510000e+02	6.607572e+03	3.100364e+03	1.321478e+03	2.702456e+03	6.695629e+02	2.036463e+03	1.670163e+03	-2.252455e+01	5.543827e+01	-9.246187e+01	7.268437e+01	-1.449898e+01	2.389766e+02	1.517936e+02	7.540152e+01	4.214130e+02	-5.745785e+01	2.572688e+01
5.520000e+02	6.523605e+03	2.956263e+03	1.261432e+03	2.547761e+03	5.679939e+02	1.983820e+03	1.589682e+03	-1.751901e+01	2.685340e+01	-1.056110e+02	3.752035e+01	-6.123850e+01	2.060990e+02	1.073406e+02	6.733945e+01	3.789037e+02	-4.518489e+01	-1.327001e+00
5.530000e+02	6.453136e+03	2.898229e+03	1.231609e+03	2.460697e+03	5.118207e+02	1.938425e+03	1.543490e+03	-6.320908e+00	7.560986e+00	-1.039215e+02	1.802056e+01	-9.003943e+01	1.827756e+02	7.471607e+01	7.347977e+01	3.606196e+02	-1.933083e+01	-2.790017e+01
5.540000e+02	6.387634e+03	2.930399e+03	1.249576e+03	2.451878e+03	5.021319e+02	1.908847e+03	1.532620e+03	1.385879e+01	1.072137e+00	-8.355443e+01	1.824615e+01	-9.634085e+01	1.720439e+02	5.745745e+01	8.996546e+01	3.682797e+02	1.272034e+01	-5.264116e+01
5.550000e+02	6.324160e+03	3.041758e+03	1.328471e+03	2.520197e+03	5.287907e+02	1.901517e+03	1.548591e+03	4.506635e+01	9.895996e+00	-4.275376e+01	4.014085e+01	-7.792384e+01	1.753954e+02	5.733134e+01	1.121313e+02	3.967014e+02	4.349427e+01	-7.481859e+01
5.560000e+02	6.265008e+03	3.207154e+03	1.471728e+03	2.652089e+03	5.725761e+02	1.918900e+03	1.575253e+03	8.773592e+01	3.505516e+01	1.745144e+01	8.286248e+01	-3.522904e+01	1.922452e+02	7.415421e+01	1.354460e+02	4.346687e+02	6.695572e+01	-9.435415e+01
5.570000e+02	6.215611e+03	3.392509e+03	1.670630e+03	2.823220e+03	6.103615e+02	1.958257e+03	1.592800e+03	1.401957e+02	7.586641e+01	9.319457e+01	1.428082e+02	2.886553e+01	2.200875e+02	1.061452e+02	1.565968e+02	4.678407e+02	7.974999e+01	-1.115688e+02
5.580000e+02	6.182040e+03	3.563082e+03	1.905848e+03	3.002931e+03	6.216625e+02	2.011948e+03	1.582946e+03	1.987940e+02	1.300436e+02	1.784343e+02	2.142793e+02	1.096841e+02	2.551832e+02	1.505882e+02	1.743120e+02	4.828100e+02	8.178205e+01	-1.267987e+02
5.590000e+02	6.169269e+03	3.692084e+03	2.152365e+03	3.160623e+03	5.943271e+02	2.069498e+03	1.533758e+03	2.586486e+02	1.940716e+02	2.661323e+02	2.905155e+02	2.015556e+02	2.934061e+02	2.044460e+02	1.895316e+02	4.709067e+02	7.595372e+01	-1.400863e+02
5.600000e+02	6.180678e+03	3.766513e+03	2.385684e+03	3.272265e+03	5.274139e+02	2.120818e+03	1.442687e+03	3.147707e+02	2.637062e+02	3.495642e+02	3.647584e+02	2.985002e+02	3.308767e+02	2.646179e+02	2.047458e+02	4.304115e+02	6.711867e+01	-1.510977e+02
5.610000e+02	6.218477e+03	3.788166e+03	2.586832e+03	3.324971e+03	4.303765e+02	2.159310e+03	1.316936e+03	3.631560e+02	3.344227e+02	4.233544e+02	4.310754e+02	3.946216e+02	3.642132e+02	3.277585e+02	2.226538e+02	3.664893e+02	6.053827e+01	-1.592918e+02
5.620000e+02	6.284168e+03	3.769836e+03	2.744517e+03	3.318236e+03	3.191439e+02	2.183553e+03	1.171286e+03	4.014534e+02	4.016954e+02	4.839676e+02	4.848486e+02	4.842103e+02	3.904991e+02	3.898594e+02	2.446288e+02	2.890790e+02	6.027610e+01	-1.642420e+02
5.630000e+02	6.378317e+03	3.728675e+03	2.854344e+03	3.261773e+03	2.108603e+02	2.196891e+03	1.024227e+03	4.290016e+02	4.611132e+02	5.296167e+02	5.229856e+02	5.617292e+02	4.072404e+02	4.459823e+02	2.696317e+02	2.097317e+02	6.800168e+01	-1.659382e+02
5.640000e+02	6.499445e+03	3.679565e+03	2.916354e+03	3.171099e+03	1.193477e+02	2.205181e+03	8.936594e+02	4.463096e+02	5.084510e+02	5.597773e+02	5.439797e+02	6.219199e+02	4.125573e+02	4.904955e+02	2.940733e+02	1.386224e+02	8.255340e+01	-1.649248e+02
5.650000e+02	6.642656e+03	3.630827e+03	2.932656e+03	3.062607e+03	5.265694e+01	2.213796e+03	7.932254e+02	4.543027e+02	5.398688e+02	5.746334e+02	5.479292e+02	6.602009e+02	4.056512e+02	5.179208e+02	3.127317e+02	8.260562e+01	1.003598e+02	-1.622178e+02
5.660000e+02	6.798966e+03	3.583250e+03	2.906432e+03	2.949623e+03	1.284561e+01	2.225284e+03	7.299192e+02	4.537562e+02	5.523447e+02	5.747601e+02	5.365403e+02	6.733503e+02	3.873537e+02	5.241616e+02	3.203673e+02	4.452349e+01	1.165304e+02	-1.590570e+02
5.670000e+02	6.956112e+03	3.532010e+03	2.842508e+03	2.840249e+03	-2.878084e+00	2.238762e+03	7.031838e+02	4.452171e+02	5.443082e+02	5.611926e+02	5.130605e+02	6.602856e+02	3.604363e+02	5.076594e+02	3.133877e+02	2.342022e+01	1.262229e+02	-1.566060e+02
5.680000e+02	7.100864e+03	3.470173e+03	2.748683e+03	2.737041e+03	-7.345370e-01	2.251241e+03	7.054622e+02	4.294411e+02	5.162790e+02	5.357973e+02	4.820504e+02	6.226370e+02	3.294279e+02	4.700128e+02	2.909339e+02	1.517214e+01	1.258517e+02	-1.557084e+02
5.690000e+02	7.222044e+03	3.392352e+03	2.636564e+03	2.638104e+03	1.075165e+01	2.260175e+03	7.240525e+02	4.080693e+02	4.712328e+02	5.016807e+02	4.489198e+02	5.648460e+02	2.998825e+02	4.158074e+02	2.550582e+02	1.328535e+01	1.138290e+02	-1.567486e+02
5.700000e+02	7.313001e+03	3.297329e+03	2.520917e+03	2.539033e+03	2.173499e+01	2.265892e+03	7.439958e+02	3.841192e+02	4.144598e+02	4.633220e+02	4.192262e+02	4.936643e+02	2.772667e+02	3.517037e+02	2.100484e+02	9.943405e+00	9.072699e+01	-1.596128e+02
5.710000e+02	7.372466e+03	3.188888e+03	2.417297e+03	2.435108e+03	2.237771e+01	2.272582e+03	7.514851e+02	3.619340e+02	3.528376e+02	4.262331e+02	3.978270e+02	4.171381e+02	2.657695e+02	2.850799e+02	1.612390e+02	-2.519724e+00	5.893777e+01	-1.637223e+02
5.720000e+02	7.403404e+03	3.074681e+03	2.338560e+03	2.323155e+03	4.718554e+00	2.287168e+03	7.370256e+02	3.464775e+02	2.936568e+02	3.961570e+02	3.880570e+02	3.433374e+02	2.673473e+02	2.226272e+02	1.137305e+02	-2.979729e+01	2.201099e+01	-1.681253e+02
5.730000e+02	7.410385e+03	2.963588e+03	2.291490e+03	2.202614e+03	-3.534917e+01	2.316378e+03	6.974964e+02	3.421604e+02	2.433034e+02	3.780101e+02	3.911367e+02	2.791539e+02	2.812310e+02	1.692479e+02	7.135478e+01	-7.391696e+01	-1.612462e+01	-1.716498e+02
5.740000e+02	7.396712e+03	2.862629e+03	2.274845e+03	2.075620e+03	-9.684090e+01	2.363271e+03	6.365074e+02	3.515793e+02	2.061580e+02	3.748630e+02	4.059787e+02	2.294422e+02	3.040064e+02	1.274696e+02	3.607940e+01	-1.323796e+02	-5.187557e+01	-1.731139e+02
5.750000e+02	7.362649e+03	2.774733e+03	2.279659e+03	1.946247e+03	-1.738853e+02	2.424825e+03	5.629804e+02	3.745959e+02	1.839968e+02	3.872310e+02	4.294661e+02	1.966322e+02	3.302682e+02	9.743407e+01	7.917539e+00	-1.986510e+02	-8.250112e+01	-1.715649e+02
5.760000e+02	7.305530e+03	2.698266e+03	2.291752e+03	1.819398e+03	-2.574136e+02	2.491802e+03	4.884754e+02	4.080724e+02	1.760020e+02	4.128555e+02	4.571447e+02	1.807851e+02	3.537418e+02	7.738191e+01	-1.467601e+01	-2.639888e+02	-1.063592e+02	-1.664919e+02
5.770000e+02	7.221460e+03	2.628346e+03	2.295466e+03	1.699787e+03	-3.376327e+02	2.551041e+03	4.241619e+02	4.463816e+02	1.793023e+02	4.470326e+02	4.841461e+02	1.799531e+02	3.686559e+02	6.446251e+01	-3.401928e+01	-3.199683e+02	-1.228711e+02	-1.579549e+02
5.780000e+02	7.107435e+03	2.559156e+03	2.277257e+03	1.591256e+03	-4.062100e+02	2.589158e+03	3.783491e+02	4.825767e+02	1.898241e+02	4.834378e+02	5.060905e+02	1.906849e+02	3.710515e+02	5.564546e+01	-5.221230e+01	-3.607188e+02	-1.322594e+02	-1.465977e+02
5.790000e+02	6.962476e+03	2.486140e+03	2.228036e+03	1.496371e+03	-4.573127e+02	2.595993e+03	3.551692e+02	5.099063e+02	2.031980e+02	5.152818e+02	5.197285e+02	2.085732e+02	3.596704e+02	4.851451e+01	-7.020611e+01	-3.840013e+02	-1.351625e+02	-1.335422e+02
5.800000e+02	6.787142e+03	2.407367e+03	2.143975e+03	1.416176e+03	-4.873051e+02	2.566450e+03	3.545459e+02	5.232527e+02	2.155181e+02	5.365581e+02	5.231992e+02	2.288232e+02	3.361525e+02	4.177571e+01	-8.722422e+01	-3.907948e+02	-1.322538e+02	-1.201866e+02
5.810000e+02	6.582062e+03	2.324050e+03	2.026301e+03	1.350150e+03	-4.936258e+02	2.500379e+03	3.731782e+02	5.200988e+02	2.238538e+02	5.431138e+02	5.159515e+02	2.468684e+02	3.044794e+02	3.539546e+01	-1.007615e+02	-3.837464e+02	-1.239819e+02	-1.079459e+02
5.820000e+02	6.347042e+03	2.240672e+03	1.880883e+03	1.296607e+03	-4.737550e+02	2.401300e+03	4.060712e+02	5.007979e+02	2.264999e+02	5.333330e+02	4.985252e+02	2.590348e+02	2.698642e+02	3.037291e+01	-1.072214e+02	-3.653263e+02	-1.105119e+02	-9.798135e+01
5.830000e+02	6.082174e+03	2.165067e+03	1.717994e+03	1.253772e+03	-4.250370e+02	2.275265e+03	4.481554e+02	4.681578e+02	2.229973e+02	5.083306e+02	4.724204e+02	2.631700e+02	2.374782e+02	2.822670e+01	-1.030388e+02	-3.365717e+02	-9.188328e+01	-9.098421e+01
5.840000e+02	5.791125e+03	2.108319e+03	1.552032e+03	1.221422e+03	-3.455670e+02	2.130686e+03	4.956607e+02	4.265630e+02	2.139570e+02	4.716736e+02	4.401644e+02	2.590675e+02	2.114298e+02	3.033174e+01	-8.595336e+01	-2.969035e+02	-6.832599e+01	-8.707008e+01
5.850000e+02	5.485193e+03	2.083923e+03	1.400513e+03	1.202514e+03	-2.356975e+02	1.979009e+03	5.470331e+02	3.809450e+02	2.007195e+02	4.287254e+02	4.054709e+02	2.484998e+02	1.942531e+02	3.728075e+01	-5.601769e+01	-2.449084e+02	-4.061438e+01	-8.582029e+01
5.860000e+02	5.185762e+03	2.105686e+03	1.281880e+03	1.203930e+03	-9.935470e+01	1.835168e+03	6.032359e+02	3.358767e+02	1.848995e+02	3.857375e+02	3.732190e+02	2.347603e+02	1.869174e+02	4.845759e+01	-1.599245e+01	-1.795187e+02	-1.031483e+01	-8.644946e+01
5.870000e+02	4.923147e+03	2.184389e+03	1.212257e+03	1.235591e+03	5.557226e+01	1.716650e+03	6.673142e+02	2.949481e+02	1.679061e+02	3.488253e+02	3.489733e+02	2.217833e+02	1.891679e+02	6.197671e+01	2.903002e+01	-1.009327e+02	2.018943e+01	-8.802290e+01
5.880000e+02	4.731277e+03	2.324023e+03	1.201915e+03	1.307793e+03	2.180745e+02	1.640634e+03	7.432059e+02	2.604708e+02	1.505623e+02	3.229854e+02	3.379598e+02	2.130770e+02	1.999357e+02	7.505169e+01	7.269152e+01	-1.087566e+01	4.794307e+01	-8.962084e+01
5.890000e+02	4.639534e+03	2.518938e+03	1.252530e+03	1.427347e+03	3.759057e+02	1.619804e+03	8.340172e+02	2.334861e+02	1.329413e+02	3.113399e+02	3.437112e+02	2.107952e+02	2.176406e+02	8.472334e+01	1.088385e+02	8.779292e+01	6.989861e+01	-9.037369e+01
5.900000e+02	4.664362e+03	2.753213e+03	1.356087e+03	1.593799e+03	5.179779e+02	1.658253e+03	9.402669e+02	2.140200e+02	1.144750e+02	3.147790e+02	3.668430e+02	2.152339e+02	2.403573e+02	8.874693e+01	1.330105e+02	1.918226e+02	8.353192e+01	-8.936734e+01
5.910000e+02	4.803478e+03	3.002837e+03	1.495830e+03	1.797149e+03	6.366493e+02	1.749138e+03	1.058773e+03	2.014977e+02	9.430241e+01	3.320882e+02	4.044699e+02	2.248928e+02	2.659416e+02	8.636321e+01	1.435649e+02	2.982916e+02	8.745294e+01	-8.550262e+01
5.920000e+02	5.034671e+03	3.240232e+03	1.649045e+03	2.018164e+03	7.293221e+02	1.875159e+03	1.182720e+03	1.951844e+02	7.173974e+01	3.604870e+02	4.505791e+02	2.370421e+02	2.922276e+02	7.868936e+01	1.421421e+02	4.050383e+02	8.185203e+01	-7.744058e+01
5.930000e+02	5.319718e+03	3.439687e+03	1.791043e+03	2.231489e+03	7.988635e+02	2.011942e+03	1.303016e+03	1.944918e+02	4.670838e+01	3.963494e+02	4.973154e+02	2.485657e+02	3.173164e+02	6.856555e+01	1.333082e+02	5.106972e+02	6.862707e+01	-6.374185e+01
5.940000e+02	5.612391e+03	3.581909e+03	1.899474e+03	2.410787e+03	8.525402e+02	2.133364e+03	1.410454e+03	1.990132e+02	1.997552e+01	4.358139e+02	5.367663e+02	2.567757e+02	3.398466e+02	5.985505e+01	1.233925e+02	6.143515e+02	5.108712e+01	-4.321793e+01
5.950000e+02	5.868387e+03	3.656367e+03	1.958050e+03	2.534360e+03	8.995215e+02	2.217187e+03	1.497820e+03	2.082652e+02	-6.874575e+00	4.750868e+02	5.626482e+02	2.599464e+02	3.590797e+02	5.637708e+01	1.187617e+02	7.149004e+02	3.324020e+01	-1.539488e+01
5.960000e+02	6.054477e+03	3.661130e+03	1.958957e+03	2.589512e+03	9.475584e+02	2.249353e+03	1.561114e+03	2.212726e+02	-3.172526e+01	5.104608e+02	5.713685e+02	2.574622e+02	3.747034e+02	6.079636e+01	1.239946e+02	8.103395e+02	1.882849e+01	1.909440e+01
5.970000e+02	6.154459e+03	3.600946e+03	1.903521e+03	2.574397e+03	9.999635e+02	2.225829e+03	1.599499e+03	2.362547e+02	-5.236876e+01	5.382781e+02	5.622446e+02	2.496539e+02	3.864296e+02	7.383835e+01	1.405370e+02	8.972644e+02	1.040457e+01	5.837529e+01
5.980000e+02	6.170377e+03	3.484824e+03	1.801093e+03	2.497045e+03	1.054138e+03	2.151791e+03	1.614254e+03	2.506597e+02	-6.695897e+01	5.551242e+02	5.370174e+02	2.375047e+02	3.936193e+02	9.410621e+01	1.663196e+02	9.709364e+02	8.766513e+00	9.955154e+01
5.990000e+02	6.118865e+03	3.324111e+03	1.666479e+03	2.372219e+03	1.102416e+03	2.038763e+03	1.607445e+03	2.616344e+02	-7.434190e+01	5.583702e+02	4.990204e+02	2.223931e+02	3.951858e+02	1.185583e+02	1.964961e+02	1.026101e+03	1.295045e+01	1.392367e+02
6.000000e+02	6.023897e+03	3.131348e+03	1.516525e+03	2.217357e+03	1.135022e+03	1.900833e+03	1.581052e+03	2.667753e+02	-7.419080e+01	5.468964e+02	4.523551e+02	2.059295e+02	3.898752e+02	1.434496e+02	2.250248e+02	1.058425e+03	2.076198e+01	1.742274e+02
6.010000e+02	5.908282e+03	2.919558e+03	1.366647e+03	2.048837e+03	1.144006e+03	1.751116e+03	1.536880e+03	2.648286e+02	-6.695361e+01	5.216033e+02	4.012422e+02	1.898203e+02	3.767878e+02	1.653661e+02	2.464834e+02	1.066073e+03	2.961841e+01	2.021003e+02
6.020000e+02	5.786600e+03	2.701492e+03	1.228095e+03	1.879423e+03	1.126528e+03	1.599283e+03	1.477091e+03	2.560003e+02	-5.368284e+01	4.853421e+02	3.495368e+02	1.756581e+02	3.558543e+02	1.819759e+02	2.574553e+02	1.050754e+03	3.737569e+01	2.215604e+02
6.030000e+02	5.661788e+03	2.488723e+03	1.106601e+03	1.717192e+03	1.086208e+03	1.450605e+03	1.404840e+03	2.417228e+02	-3.583740e+01	4.421673e+02	3.003331e+02	1.646064e+02	3.280110e+02	1.922846e+02	2.570705e+02	1.017734e+03	4.286429e+01	2.324784e+02
6.040000e+02	5.526356e+03	2.290903e+03	1.002692e+03	1.565853e+03	1.032153e+03	1.306529e+03	1.324562e+03	2.239951e+02	-1.511901e+01	3.961907e+02	2.556710e+02	1.570759e+02	2.950155e+02	1.964207e+02	2.466892e+02	9.747084e+02	4.601620e+01	2.356741e+02
6.050000e+02	5.367619e+03	2.115684e+03	9.134741e+02	1.426149e+03	9.762539e+02	1.166479e+03	1.241730e+03	2.046245e+02	6.644883e+00	3.505493e+02	2.164585e+02	1.525689e+02	2.590647e+02	1.951754e+02	2.290688e+02	9.299062e+02	4.764178e+01	2.325675e+02
6.060000e+02	5.174963e+03	1.969416e+03	8.351819e+02	1.297896e+03	9.299870e+02	1.030292e+03	1.162221e+03	1.847247e+02	2.760427e+01	3.069555e+02	1.827317e+02	1.498344e+02	2.224741e+02	1.895771e+02	2.074898e+02	8.901315e+02	4.903232e+01	2.248332e+02
6.070000e+02	4.946459e+03	1.858222e+03	7.655400e+02	1.182062e+03	9.019546e+02	9.004257e+02	1.091602e+03	1.646669e+02	4.602112e+01	2.659873e+02	1.542317e+02	1.473409e+02	1.875950e+02	1.807044e+02	1.852060e+02	8.594408e+02	5.158456e+01	2.141456e+02
6.080000e+02	4.692529e+03	1.788660e+03	7.050836e+02	1.082208e+03	8.968843e+02	7.830566e+02	1.034574e+03	1.444386e+02	6.045800e+01	2.278951e+02	1.310831e+02	1.439140e+02	1.569465e+02	1.697775e+02	1.653341e+02	8.388713e+02	5.657945e+01	2.020476e+02
6.090000e+02	4.435543e+03	1.767242e+03	6.570445e+02	1.004649e+03	9.160676e+02	6.874957e+02	9.946151e+02	1.241633e+02	6.999939e+01	1.934502e+02	1.142338e+02	1.392857e+02	1.333564e+02	1.584085e+02	1.510266e+02	8.271834e+02	6.513936e+01	1.899155e+02
6.100000e+02	4.205743e+03	1.798644e+03	6.260138e+02	9.571064e+02	9.585887e+02	6.239359e+02	9.737043e+02	1.044924e+02	7.444324e+01	1.643709e+02	1.053774e+02	1.343213e+02	1.198591e+02	1.488030e+02	1.456310e+02	8.221655e+02	7.828366e+01	1.789600e+02
6.110000e+02	4.034953e+03	1.883013e+03	6.160403e+02	9.461437e+02	1.022426e+03	6.002504e+02	9.719720e+02	8.668104e+01	7.438438e+01	1.430990e+02	1.062922e+02	1.308019e+02	1.192003e+02	1.437101e+02	1.525449e+02	8.218450e+02	9.694420e+01	1.701945e+02
6.120000e+02	3.949921e+03	2.013377e+03	6.289309e+02	9.742382e+02	1.104691e+03	6.190040e+02	9.872361e+02	7.234693e+01	7.112797e+01	1.320334e+02	1.178112e+02	1.308141e+02	1.330148e+02	1.460178e+02	1.746356e+02	8.250456e+02	1.218142e+02	1.643304e+02
6.130000e+02	3.966828e+03	2.174248e+03	6.632797e+02	1.037537e+03	1.200836e+03	6.758026e+02	1.014601e+03	6.305277e+01	6.641604e+01	1.325739e+02	1.388363e+02	1.359368e+02	1.609359e+02	1.580366e+02	2.133133e+02	8.310896e+02	1.529890e+02	1.616172e+02
6.140000e+02	4.087921e+03	2.342272e+03	7.143635e+02	1.125166e+03	1.303327e+03	7.596028e+02	1.046452e+03	5.990422e+01	6.200853e+01	1.443968e+02	1.658406e+02	1.465008e+02	2.000024e+02	1.806629e+02	2.675490e+02	8.389044e+02	1.894828e+02	1.617096e+02
6.150000e+02	4.300745e+03	2.489240e+03	7.747147e+02	1.220441e+03	1.400787e+03	8.548561e+02	1.073185e+03	6.329360e+01	5.921499e+01	1.652573e+02	1.931526e+02	1.611785e+02	2.446810e+02	2.127071e+02	3.332327e+02	8.461341e+02	2.288228e+02	1.636757e+02
6.160000e+02	4.580011e+03	2.586982e+03	8.350912e+02	1.303717e+03	1.478598e+03	9.447293e+02	1.084781e+03	7.281871e+01	5.850863e+01	1.913814e+02	2.140469e+02	1.770712e+02	2.876474e+02	2.506720e+02	4.032171e+02	8.488918e+02	2.669628e+02	1.662178e+02
6.170000e+02	4.891799e+03	2.613084e+03	8.856518e+02	1.356185e+03	1.521362e+03	1.014373e+03	1.072998e+03	8.732980e+01	5.935545e+01	2.182844e+02	2.223759e+02	1.903100e+02	3.212193e+02	2.891536e+02	4.682181e+02	8.424745e+02	2.986969e+02	1.680785e+02
6.180000e+02	5.199360e+03	2.555950e+03	9.173049e+02	1.363705e+03	1.516733e+03	1.053364e+03	1.033564e+03	1.050471e+02	6.034818e+01	2.417209e+02	2.142584e+02	1.970219e+02	3.390907e+02	3.218545e+02	5.184673e+02	8.228513e+02	3.185888e+02	1.684829e+02
6.190000e+02	5.469443e+03	2.417826e+03	9.232318e+02	1.319848e+03	1.459325e+03	1.056899e+03	9.676289e+02	1.237287e+02	5.964767e+01	2.584687e+02	1.892799e+02	1.943876e+02	3.378682e+02	3.429761e+02	5.457481e+02	7.882957e+02	3.222246e+02	1.674104e+02
6.200000e+02	5.677894e+03	2.214911e+03	9.004505e+02	1.227484e+03	1.353115e+03	1.025763e+03	8.818742e+02	1.409073e+02	5.562119e+01	2.667476e+02	1.507773e+02	1.814613e+02	3.179156e+02	3.485998e+02	5.452584e+02	7.403976e+02	3.074310e+02	1.655384e+02
6.210000e+02	5.813377e+03	1.974459e+03	8.510470e+02	1.098553e+03	1.211267e+03	9.654604e+02	7.871228e+02	1.542128e+02	4.746874e+01	2.662234e+02	1.050592e+02	1.594791e+02	2.831990e+02	3.376190e+02	5.167304e+02	6.839545e+02	2.750444e+02	1.638520e+02
6.220000e+02	5.878457e+03	1.729623e+03	7.825582e+02	9.519633e+02	1.053277e+03	8.849294e+02	6.958556e+02	1.617499e+02	3.559695e+01	2.576838e+02	5.976266e+01	1.315306e+02	2.401368e+02	3.119049e+02	4.644218e+02	6.257621e+02	2.289232e+02	1.630859e+02
6.230000e+02	5.887767e+03	1.513368e+03	7.070940e+02	8.099909e+02	9.004107e+02	7.951600e+02	6.194506e+02	1.624441e+02	2.157015e+01	2.425588e+02	2.184832e+01	1.016844e+02	1.958084e+02	2.756446e+02	3.959507e+02	5.728407e+02	1.751363e+02	1.632725e+02
6.240000e+02	5.863699e+03	1.352991e+03	6.391661e+02	6.939159e+02	7.710674e+02	7.078451e+02	5.660606e+02	1.562504e+02	7.629841e+00	2.224725e+02	-4.133781e+00	7.385162e+01	1.561104e+02	2.340959e+02	3.203517e+02	5.308836e+02	1.205574e+02	1.636314e+02
6.250000e+02	5.830713e+03	1.266444e+03	5.926854e+02	6.199470e+02	6.776290e+02	6.340598e+02	5.397648e+02	1.441503e+02	-4.039881e+00	1.989728e+02	-1.697043e+01	5.078225e+01	1.244769e+02	1.922298e+02	2.460191e+02	5.035724e+02	7.131609e+01	1.628808e+02
6.260000e+02	5.809904e+03	1.261000e+03	5.779561e+02	5.964511e+02	6.256416e+02	5.829637e+02	5.410927e+02	1.279415e+02	-1.200737e+01	1.734918e+02	-1.865250e+01	3.354243e+01	1.015625e+02	1.537577e+02	1.792204e+02	4.929521e+02	3.160151e+01	1.598426e+02
6.270000e+02	5.815412e+03	1.334014e+03	5.995415e+02	6.231666e+02	6.151250e+02	5.606244e+02	5.684683e+02	1.098841e+02	-1.597723e+01	1.474921e+02	-1.330473e+01	2.163034e+01	8.590300e+01	1.208385e+02	1.235801e+02	5.005063e+02	3.147543e+00	1.540710e+02
6.280000e+02	5.853665e+03	1.474932e+03	6.555728e+02	6.924532e+02	6.429415e+02	5.691884e+02	6.197794e+02	9.229521e+01	-1.674414e+01	1.226672e+02	-5.610696e+00	1.362747e+01	7.518546e+01	9.442415e+01	8.047994e+01	5.282025e+02	-1.456163e+01	1.462162e+02
6.290000e+02	5.925227e+03	1.667654e+03	7.385723e+02	7.920054e+02	7.048621e+02	6.066636e+02	6.932983e+02	7.716754e+01	-1.579768e+01	1.010325e+02	6.996393e-01	8.066883e+00	6.753370e+01	7.490159e+01	4.992937e+01	5.787689e+02	-2.359781e+01	1.379537e+02
6.300000e+02	6.027965e+03	1.892636e+03	8.373864e+02	9.080576e+02	7.963939e+02	6.674562e+02	7.875459e+02	6.585543e+01	-1.479505e+01	8.478739e+01	3.816184e+00	4.136576e+00	6.226888e+01	6.259000e+01	3.134074e+01	6.548548e+02	-2.675572e+01	1.314925e+02
6.310000e+02	6.159813e+03	2.128705e+03	9.395564e+02	1.028121e+03	9.123104e+02	7.435688e+02	9.002329e+02	5.886028e+01	-1.512416e+01	7.593538e+01	4.037954e+00	1.950671e+00	5.988904e+01	5.780252e+01	2.383360e+01	7.573272e+02	-2.686114e+01	1.288462e+02
6.320000e+02	6.319925e+03	2.354857e+03	1.033466e+03	1.142643e+03	1.045652e+03	8.261190e+02	1.026906e+03	5.575270e+01	-1.767307e+01	7.577238e+01	3.258988e+00	2.346422e+00	6.139623e+01	6.048443e+01	2.606359e+01	8.834796e+02	-2.632666e+01	1.311371e+02
6.330000e+02	6.508114e+03	2.552257e+03	1.109822e+03	1.245487e+03	1.187260e+03	9.067378e+02	1.160106e+03	5.527350e+01	-2.278683e+01	8.443861e+01	4.052994e+00	6.378199e+00	6.738800e+01	6.971393e+01	3.588380e+01	1.026076e+03	-2.690853e+01	1.381825e+02
6.340000e+02	6.723436e+03	2.706287e+03	1.162335e+03	1.333515e+03	1.326500e+03	9.784956e+02	1.289650e+03	5.562956e+01	-3.031440e+01	1.007226e+02	8.732330e+00	1.477866e+01	7.739347e+01	8.344046e+01	5.022854e+01	1.173837e+03	-2.957182e+01	1.485013e+02
6.350000e+02	6.963023e+03	2.808109e+03	1.187720e+03	1.405720e+03	1.453029e+03	1.036235e+03	1.404120e+03	5.494069e+01	-3.965964e+01	1.222156e+02	1.867811e+01	2.761544e+01	8.976231e+01	9.870021e+01	6.544434e+01	1.313326e+03	-3.442190e+01	1.597202e+02
6.360000e+02	7.221628e+03	2.855156e+03	1.185293e+03	1.462282e+03	1.558766e+03	1.076424e+03	1.493081e+03	5.172703e+01	-4.981647e+01	1.457842e+02	3.407493e+01	4.424095e+01	1.021174e+02	1.122839e+02	7.801209e+01	1.431579e+03	-4.073190e+01	1.692147e+02
6.370000e+02	7.491532e+03	2.850393e+03	1.156459e+03	1.503749e+03	1.639101e+03	1.096783e+03	1.549199e+03	4.529454e+01	-5.942769e+01	1.682187e+02	5.402213e+01	6.349682e+01	1.121199e+02	1.215948e+02	8.538376e+01	1.518542e+03	-4.711389e+01	1.747374e+02
6.380000e+02	7.762051e+03	2.800723e+03	1.104298e+03	1.530438e+03	1.692884e+03	1.095918e+03	1.569519e+03	3.590349e+01	-6.691660e+01	1.868719e+02	7.689074e+01	8.405227e+01	1.181883e+02	1.253500e+02	8.660749e+01	1.568553e+03	-5.183198e+01	1.748194e+02
6.390000e+02	8.018399e+03	2.715328e+03	1.033326e+03	1.542125e+03	1.721454e+03	1.073124e+03	1.555556e+03	2.467912e+01	-7.070292e+01	2.001216e+02	1.007662e+02	1.047400e+02	1.198969e+02	1.238705e+02	8.252935e+01	1.580649e+03	-5.318515e+01	1.688490e+02
6.400000e+02	8.240642e+03	2.604669e+03	9.493635e+02	1.538160e+03	1.727512e+03	1.028413e+03	1.512424e+03	1.330674e+01	-6.946627e+01	2.075559e+02	1.238429e+02	1.247834e+02	1.179691e+02	1.189093e+02	7.554794e+01	1.557984e+03	-4.985545e+01	1.568955e+02
6.410000e+02	8.404330e+03	2.480376e+03	8.593376e+02	1.518085e+03	1.714604e+03	9.627458e+02	1.447555e+03	3.607357e+00	-6.239418e+01	2.098599e+02	1.446906e+02	1.438590e+02	1.139872e+02	1.131550e+02	6.905606e+01	1.506896e+03	-4.114471e+01	1.394560e+02
6.420000e+02	8.484163e+03	2.355639e+03	7.708489e+02	1.482768e+03	1.687457e+03	8.784081e+02	1.369631e+03	-2.898594e+00	-4.935735e+01	2.084546e+02	1.623768e+02	1.619964e+02	1.100279e+02	1.096467e+02	6.677211e+01	1.436086e+03	-2.708000e+01	1.173071e+02
6.430000e+02	8.460770e+03	2.245380e+03	6.914213e+02	1.435739e+03	1.652796e+03	7.793467e+02	1.288002e+03	-5.347639e+00	-3.097636e+01	2.049984e+02	1.764654e+02	1.793702e+02	1.083947e+02	1.112986e+02	7.214209e+01	1.356034e+03	-8.407129e+00	9.153563e+01
6.440000e+02	8.328729e+03	2.165510e+03	6.275106e+02	1.384220e+03	1.619922e+03	6.712552e+02	1.212504e+03	-3.739827e+00	-8.563123e+00	2.008934e+02	1.869320e+02	1.960707e+02	1.114776e+02	1.206153e+02	8.791554e+01	1.278477e+03	1.351041e+01	6.367775e+01
6.450000e+02	8.102632e+03	2.131076e+03	5.834885e+02	1.339234e+03	1.600411e+03	5.611589e+02	1.153258e+03	1.052677e+00	1.606657e+01	1.969224e+02	1.940117e+02	2.119368e+02	1.216271e+02	1.395512e+02	1.159092e+02	1.215658e+03	3.689221e+01	3.580523e+01
6.460000e+02	7.817999e+03	2.153589e+03	5.608752e+02	1.314357e+03	1.606732e+03	4.563950e+02	1.120027e+03	7.489976e+00	4.089338e+01	1.930917e+02	1.979793e+02	2.264956e+02	1.408800e+02	1.693952e+02	1.569036e+02	1.179141e+03	5.984950e+01	1.040966e+01
6.470000e+02	7.525600e+03	2.238208e+03	5.580377e+02	1.323104e+03	1.650032e+03	3.631457e+02	1.120920e+03	1.374202e+01	6.405786e+01	1.886753e+02	1.988669e+02	2.389916e+02	1.704605e+02	2.105842e+02	2.105932e+02	1.178205e+03	8.076909e+01	-9.955187e+00
6.480000e+02	7.280323e+03	2.381507e+03	5.704413e+02	1.375469e+03	1.737617e+03	2.849665e+02	1.160609e+03	1.813618e+01	8.419935e+01	1.823950e+02	1.961745e+02	2.484585e+02	2.101527e+02	2.624359e+02	2.755347e+02	1.218042e+03	9.867802e+01	-2.318237e+01
6.490000e+02	7.128020e+03	2.570441e+03	5.914014e+02	1.474537e+03	1.870664e+03	2.218896e+02	1.238495e+03	1.953513e+01	1.006688e+02	1.726596e+02	1.886921e+02	2.537935e+02	2.578017e+02	3.229025e+02	3.491047e+02	1.298124e+03	1.134586e+02	-2.809893e+01
6.500000e+02	7.094564e+03	2.782915e+03	6.131814e+02	1.614192e+03	2.042661e+03	1.705433e+02	1.347482e+03	1.752801e+01	1.135441e+02	1.578198e+02	1.745728e+02	2.538361e+02	3.092457e+02	3.885086e+02	4.275399e+02	1.411197e+03	1.258137e+02	-2.475968e+01
6.510000e+02	7.180399e+03	2.990179e+03	6.282387e+02	1.778759e+03	2.239001e+03	1.253440e+02	1.473909e+03	1.239784e+01	1.234470e+02	1.364393e+02	1.517355e+02	2.474887e+02	3.588526e+02	4.546056e+02	5.061587e+02	1.543335e+03	1.369727e+02	-1.444870e+01
6.520000e+02	7.361679e+03	3.160882e+03	6.304081e+02	1.944921e+03	2.438119e+03	8.036508e+01	1.599016e+03	4.923153e+00	1.312306e+02	1.076012e+02	1.185376e+02	2.339088e+02	4.005872e+02	5.159584e+02	5.798028e+02	1.675398e+03	1.482313e+02	6.069493e-01
6.530000e+02	7.596827e+03	3.266190e+03	6.158240e+02	2.085635e+03	2.614335e+03	3.120067e+01	1.701839e+03	-3.874146e+00	1.376482e+02	7.122720e+01	7.451520e+01	2.127497e+02	4.292901e+02	5.675249e+02	6.434343e+02	1.785914e+03	1.604814e+02	1.771377e+01
6.540000e+02	7.835866e+03	3.284873e+03	5.834162e+02	2.175214e+03	2.742081e+03	-2.382932e+01	1.763016e+03	-1.293738e+01	1.430993e+02	2.833366e+01	2.091795e+01	1.843705e+02	4.417304e+02	6.051834e+02	6.927249e+02	1.854921e+03	1.738725e+02	3.422733e+01
6.550000e+02	8.029717e+03	3.207052e+03	5.348924e+02	2.194347e+03	2.800621e+03	-8.346230e+01	1.768564e+03	-2.130761e+01	1.475055e+02	-1.889682e+01	-3.918467e+01	1.499165e+02	4.370849e+02	6.261868e+02	7.244676e+02	1.867867e+03	1.876886e+02	4.795565e+01
6.560000e+02	8.137415e+03	3.035615e+03	4.742331e+02	2.133841e+03	2.777960e+03	-1.441681e+02	1.712622e+03	-2.820945e+01	1.503263e+02	-6.731919e+01	-1.012997e+02	1.112168e+02	4.167419e+02	6.292595e+02	7.367404e+02	1.818499e+03	2.004487e+02	5.735603e+01
6.570000e+02	8.130467e+03	2.785001e+03	4.068455e+02	1.996186e+03	2.672811e+03	-2.013020e+02	1.598422e+03	-3.313485e+01	1.506956e+02	-1.133105e+02	-1.603062e+02	7.052036e+01	3.836056e+02	6.144332e+02	7.288921e+02	1.709874e+03	2.101894e+02	6.152356e+01
6.580000e+02	7.994549e+03	2.477915e+03	3.385968e+02	1.794697e+03	2.494133e+03	-2.502463e+02	1.437307e+03	-3.593465e+01	1.476531e+02	-1.534259e+02	-2.114149e+02	3.016237e+01	3.412474e+02	5.828259e+02	7.015014e+02	1.553274e+03	2.148668e+02	6.005813e+01
6.590000e+02	7.729312e+03	2.141048e+03	2.749478e+02	1.550615e+03	2.258612e+03	-2.871971e+02	1.246179e+03	-3.687675e+01	1.404298e+02	-1.850356e+02	-2.510178e+02	-7.728545e+00	2.932310e+02	5.365214e+02	6.564054e+02	1.365455e+03	2.128019e+02	5.293466e+01
6.600000e+02	7.347004e+03	1.800939e+03	2.203366e+02	1.289042e+03	1.987065e+03	-3.094990e+02	1.044155e+03	-3.661075e+01	1.287278e+02	-2.067461e+02	-2.772007e+02	-4.140700e+01	2.427675e+02	4.785624e+02	5.967569e+02	1.165115e+03	2.030835e+02	4.046527e+01
6.610000e+02	6.870407e+03	1.480706e+03	1.778651e+02	1.034705e+03	1.700838e+03	-3.156353e+02	8.492558e+02	-3.600943e+01	1.129157e+02	-2.184819e+02	-2.898062e+02	-6.955611e+01	1.926562e+02	4.129074e+02	5.269345e+02	9.695090e+02	1.858283e+02	2.335465e+01
6.620000e+02	6.330241e+03	1.197929e+03	1.492532e+02	8.084142e+02	1.418955e+03	-3.050644e+02	6.757719e+02	-3.592077e+01	9.406503e+01	-2.212286e+02	-2.900692e+02	-9.124213e+01	1.453406e+02	3.441686e+02	4.521355e+02	7.919265e+02	1.622163e+02	2.767635e+00
6.630000e+02	5.762117e+03	9.636373e+02	1.349836e+02	6.247061e+02	1.156275e+03	-2.780583e+02	5.326795e+02	-3.691622e+01	7.379328e+01	-2.165537e+02	-2.799757e+02	-1.058435e+02	1.029125e+02	2.770453e+02	3.776208e+02	6.403324e+02	1.342657e+02	-1.969486e+01
6.640000e+02	5.203130e+03	7.822410e+02	1.345475e+02	4.908596e+02	9.226098e+02	-2.356056e+02	4.231933e+02	-3.912966e+01	5.394560e+01	-2.060853e+02	-2.615665e+02	-1.130094e+02	6.700124e+01	2.155588e+02	3.077884e+02	5.172046e+02	1.044011e+02	-4.216410e+01
6.650000e+02	4.688336e+03	6.523278e+02	1.467164e+02	4.071780e+02	7.226442e+02	-1.793496e+02	3.453777e+02	-4.224133e+01	3.620614e+01	-1.911155e+02	-2.364087e+02	-1.126675e+02	3.859989e+01	1.623414e+02	2.453989e+02	4.203738e+02	7.494843e+01	-6.277917e+01
6.660000e+02	4.247451e+03	5.681946e+02	1.697803e+02	3.682909e+02	5.565685e+02	-1.115048e+02	2.935888e+02	-4.559942e+01	2.176266e+01	-1.724280e+02	-2.053857e+02	-1.050654e+02	1.794355e+01	1.182640e+02	1.912612e+02	3.445739e+02	4.772964e+01	-7.996433e+01
6.670000e+02	3.902080e+03	5.218851e+02	2.017208e+02	3.651258e+02	4.213452e+02	-3.472132e+01	2.604051e+02	-4.842250e+01	1.112851e+01	-1.503589e+02	-1.688426e+02	-9.080739e+01	4.537467e+00	8.257263e+01	1.445297e+02	2.833447e+02	2.389388e+01	-9.259875e+01
6.680000e+02	3.663727e+03	5.052918e+02	2.403072e+02	3.871316e+02	3.124473e+02	4.807132e+01	2.386186e+02	-5.000910e+01	4.167029e+00	-1.250307e+02	-1.270054e+02	-7.085422e+01	-2.645070e+00	5.350598e+01	1.035195e+02	2.308942e+02	4.023743e+00	-1.000291e+02
6.690000e+02	3.532756e+03	5.117563e+02	2.831228e+02	4.243018e+02	2.256994e+02	1.337698e+02	2.228333e+02	-4.989585e+01	2.884323e-01	-9.666159e+01	-8.051313e+01	-4.647708e+01	-4.861610e+00	2.917425e+01	6.673793e+01	1.835309e+02	-1.157028e+01	-1.019622e+02
6.700000e+02	3.498421e+03	5.366724e+02	3.275447e+02	4.685855e+02	1.587011e+02	2.191001e+02	2.103006e+02	-4.793513e+01	-1.270237e+00	-6.584631e+01	-3.086568e+01	-1.918133e+01	-3.313555e+00	8.370605e+00	3.373628e+01	1.403486e+02	-2.253902e+01	-9.833370e+01
6.710000e+02	3.540066e+03	5.769108e+02	3.707063e+02	5.144233e+02	1.113321e+02	3.005367e+02	2.008172e+02	-4.429156e+01	-1.192260e+00	-3.372449e+01	1.938272e+01	9.374769e+00	1.018395e+00	-8.989735e+00	5.448682e+00	1.030059e+02	-2.834614e+01	-8.925309e+01
6.720000e+02	3.629540e+03	6.293496e+02	4.094911e+02	5.583898e+02	8.509690e+01	3.742376e+02	1.957907e+02	-3.937548e+01	5.844068e-02	-1.984501e+00	6.678100e+01	3.744926e+01	7.367889e+00	-2.196399e+01	-1.612244e+01	7.467503e+01	-2.838118e+01	-7.506741e+01
6.730000e+02	3.734759e+03	6.892158e+02	4.406202e+02	5.982084e+02	8.150991e+01	4.361291e+02	1.968435e+02	-3.374011e+01	2.233117e+00	2.730192e+01	1.074723e+02	6.327489e+01	1.503656e+01	-2.916093e+01	-2.876228e+01	5.849660e+01	-2.230344e+01	-5.651015e+01
6.740000e+02	3.824081e+03	7.491013e+02	4.608907e+02	6.316180e+02	1.001579e+02	4.822267e+02	2.044834e+02	-2.797027e+01	5.182191e+00	5.197041e+01	1.378848e+02	8.512253e+01	2.320016e+01	-2.956218e+01	-3.111278e+01	5.605754e+01	-1.046471e+01	-3.483986e+01
6.750000e+02	3.870940e+03	7.992593e+02	4.675710e+02	6.556136e+02	1.372848e+02	5.091716e+02	2.173291e+02	-2.258625e+01	8.703766e+00	7.010187e+01	1.554156e+02	1.013915e+02	3.077845e+01	-2.324565e+01	-2.353224e+01	6.642520e+01	5.798794e+00	-1.186247e+01
6.760000e+02	3.857936e+03	8.291996e+02	4.588627e+02	6.664078e+02	1.855790e+02	5.148336e+02	2.321437e+02	-1.797815e+01	1.244193e+01	8.032323e+01	1.589043e+02	1.107429e+02	3.645060e+01	-1.171083e+01	-8.393042e+00	8.606582e+01	2.417973e+01	1.022550e+01
6.770000e+02	3.779512e+03	8.299421e+02	4.342522e+02	6.601120e+02	2.353357e+02	4.987645e+02	2.445871e+02	-1.437711e+01	1.589093e+01	8.200871e+01	1.487803e+02	1.122764e+02	3.883542e+01	2.331502e+00	1.032169e+01	1.096260e+02	4.177459e+01	2.916018e+01
6.780000e+02	3.642477e+03	7.959395e+02	3.945634e+02	6.337774e+02	2.765460e+02	4.623054e+02	2.503111e+02	-1.186132e+01	1.850734e+01	7.535665e+01	1.268842e+02	1.057250e+02	3.678543e+01	1.562616e+01	2.798851e+01	1.312132e+02	5.572391e+01	4.301459e+01
6.790000e+02	3.464103e+03	7.258608e+02	3.416457e+02	5.862549e+02	3.010550e+02	4.082815e+02	2.459229e+02	-1.038838e+01	1.987865e+01	6.134985e+01	9.607134e+01	9.161665e+01	2.969534e+01	2.524060e+01	4.052935e+01	1.456498e+02	6.390103e+01	5.056256e+01
6.800000e+02	3.268104e+03	6.220651e+02	2.778227e+02	5.184494e+02	3.039569e+02	3.403917e+02	2.294851e+02	-9.838821e+00	1.986856e+01	4.162855e+01	5.974065e+01	7.133577e+01	1.771860e+01	2.931367e+01	4.539338e+01	1.492715e+02	6.540345e+01	5.149609e+01
6.810000e+02	3.079543e+03	4.893088e+02	2.053923e+02	4.329041e+02	2.838340e+02	2.625450e+02	2.005099e+02	-1.005200e+01	1.867051e+01	1.831202e+01	2.141618e+01	4.703446e+01	1.822127e+00	2.744038e+01	4.202471e+01	1.401372e+02	6.068019e+01	4.644642e+01
6.820000e+02	2.920029e+03	3.335792e+02	1.264693e+02	3.330411e+02	2.420525e+02	1.784221e+02	1.596670e+02	-1.083713e+01	1.674603e+01	-6.198873e+00	-1.555651e+01	2.138430e+01	-1.632919e+01	2.061162e+01	3.173237e+01	1.178258e+02	5.127850e+01	3.682680e+01
6.830000e+02	2.804534e+03	1.617312e+02	4.328090e+01	2.225626e+02	1.817334e+02	9.141431e+01	1.085207e+02	-1.195350e+01	1.467792e+01	-2.941944e+01	-4.820252e+01	-2.787926e+00	-3.461375e+01	1.080085e+01	1.710938e+01	8.315319e+01	3.934095e+01	2.456146e+01
6.840000e+02	2.740455e+03	-1.802833e+01	-4.125194e+01	1.053709e+02	1.070275e+02	4.883322e+00	4.948930e+01	-1.307319e+01	1.300429e+01	-4.898004e+01	-7.404988e+01	-2.290240e+01	-5.075375e+01	3.937435e-01	1.276891e+00	3.806436e+01	2.705704e+01	1.177399e+01
6.850000e+02	2.728695e+03	-1.953890e+02	-1.230166e+02	-1.400769e+01	2.296626e+01	-7.749709e+01	-1.400247e+01	-1.375558e+01	1.209936e+01	-6.284009e+01	-9.126403e+01	-3.698492e+01	-6.262045e+01	-8.341329e+00	-1.278512e+01	-1.426767e+01	1.624642e+01	4.866350e-01
6.860000e+02	2.765766e+03	-3.577399e+02	-1.966693e+02	-1.298645e+02	-6.429930e+01	-1.516011e+02	-7.738974e+01	-1.346595e+01	1.213540e+01	-6.952393e+01	-9.881604e+01	-4.392232e+01	-6.851389e+01	-1.362019e+01	-2.267793e+01	-6.932472e+01	8.152988e+00	-7.644642e+00
6.870000e+02	2.845729e+03	-4.910911e+02	-2.562264e+02	-2.351073e+02	-1.473438e+02	-2.130742e+02	-1.350896e+02	-1.165401e+01	1.311603e+01	-6.835336e+01	-9.665740e+01	-4.358304e+01	-6.739975e+01	-1.432544e+01	-2.679200e+01	-1.213683e+02	3.423292e+00	-1.154508e+01
6.880000e+02	2.961174e+03	-5.821237e+02	-2.961702e+02	-3.217414e+02	-2.178346e+02	-2.578792e+02	-1.809975e+02	-7.881310e+00	1.493939e+01	-5.961340e+01	-8.581902e+01	-3.679242e+01	-5.907970e+01	-1.005318e+01	-2.436561e+01	-1.639719e+02	2.183810e+00	-1.086380e+01
6.890000e+02	3.103184e+03	-6.208587e+02	-3.127230e+02	-3.820299e+02	-2.675752e+02	-2.829661e+02	-2.093116e+02	-1.962091e+00	1.744403e+01	-4.457471e+01	-6.833934e+01	-2.516831e+01	-4.426198e+01	-1.091066e+00	-1.548340e+01	-1.909426e+02	4.136213e+00	-6.012791e+00
6.900000e+02	3.260932e+03	-6.031869e+02	-3.048862e+02	-4.100373e+02	-2.900386e+02	-2.868432e+02	-2.155274e+02	5.925922e+00	2.041125e+01	-2.532834e+01	-4.697637e+01	-1.084274e+01	-2.450415e+01	1.162937e+01	-1.055090e+00	-1.974518e+02	8.634279e+00	1.919993e+00
6.910000e+02	3.421726e+03	-5.325440e+02	-2.749360e+02	-4.031259e+02	-2.819704e+02	-2.699183e+02	-1.974131e+02	1.519689e+01	2.353102e+01	-4.455455e+00	-2.475069e+01	3.878954e+00	-2.026690e+00	2.660287e+01	1.724289e+01	-1.811220e+02	1.475230e+01	1.137498e+01
6.920000e+02	3.572088e+03	-4.202188e+02	-2.282430e+02	-3.630106e+02	-2.445840e+02	-2.345995e+02	-1.557831e+02	2.489809e+01	2.636662e+01	1.538227e+01	-4.448773e+00	1.685111e+01	2.057171e+01	4.187155e+01	3.711155e+01	-1.428168e+02	2.137494e+01	2.059829e+01
6.930000e+02	3.699768e+03	-2.840246e+02	-1.724376e+02	-2.960764e+02	-1.839427e+02	-1.851827e+02	-9.487322e+01	3.384037e+01	2.836182e+01	3.182633e+01	1.176535e+01	2.634812e+01	4.065048e+01	5.523326e+01	5.589936e+01	-8.691129e+01	2.732896e+01	2.792986e+01
6.940000e+02	3.796016e+03	-1.453426e+02	-1.160606e+02	-2.127684e+02	-1.102788e+02	-1.275135e+02	-2.210237e+01	4.080570e+01	2.891877e+01	4.310640e+01	2.254136e+01	3.121984e+01	5.587465e+01	6.455320e+01	7.099926e+01	-2.087024e+01	3.155168e+01	3.205040e+01
6.950000e+02	3.857159e+03	-2.493948e+01	-6.693695e+01	-1.259935e+02	-3.621306e+01	-6.835092e+01	5.294231e+01	4.480030e+01	2.754172e+01	4.821146e+01	2.734809e+01	3.095326e+01	6.454708e+01	6.815241e+01	8.031958e+01	4.593932e+01	3.326735e+01	3.216147e+01
6.960000e+02	3.884730e+03	6.154706e+01	-3.062133e+01	-4.868927e+01	2.586835e+01	-1.440172e+01	1.202675e+02	4.529894e+01	2.400513e+01	4.697050e+01	2.637899e+01	2.567706e+01	6.589753e+01	6.519582e+01	8.272700e+01	1.040774e+02	3.213037e+01	2.809378e+01
6.970000e+02	3.884050e+03	1.071688e+02	-9.340851e+00	8.958079e+00	6.669517e+01	2.884331e+01	1.716380e+02	4.240876e+01	1.848269e+01	4.006254e+01	2.044815e+01	1.613682e+01	6.027798e+01	5.596693e+01	7.833618e+01	1.461173e+02	2.829670e+01	2.033995e+01
6.980000e+02	3.861835e+03	1.150014e+02	-1.810033e+00	4.185637e+01	8.242310e+01	5.814207e+01	2.025131e+02	3.688651e+01	1.157829e+01	2.894266e+01	1.090588e+01	3.634731e+00	4.918915e+01	4.191830e+01	6.853752e+01	1.683919e+02	2.239852e+01	9.997886e+00
6.990000e+02	3.823904e+03	9.660657e+01	-4.044600e+00	5.106117e+01	7.556615e+01	7.299803e+01	2.130615e+02	2.998087e+01	4.230807e+00	1.564694e+01	-4.707744e-01	-1.010291e+01	3.506875e+01	2.543692e+01	5.571604e+01	1.717922e+02	1.541831e+01	-1.392625e+00
7.000000e+02	3.773945e+03	6.803790e+01	-1.091462e+01	4.303351e+01	5.412316e+01	7.537379e+01	2.078252e+02	2.313138e+01	-2.489928e+00	2.456339e+00	-1.168592e+01	-2.316484e+01	2.082845e+01	9.349822e+00	4.270445e+01	1.612820e+02	8.481862e+00	-1.211733e+01
7.010000e+02	3.713825e+03	4.480919e+01	-1.784833e+01	2.727319e+01	2.910691e+01	6.871330e+01	1.941095e+02	1.761212e+01	-7.638201e+00	-8.543792e+00	-2.086141e+01	-3.379405e+01	9.217715e+00	-3.714666e+00	3.210185e+01	1.442581e+02	2.610821e+00	-2.061851e+01
7.020000e+02	3.645121e+03	3.762620e+01	-2.203687e+01	1.318567e+01	1.129418e+01	5.669625e+01	1.796802e+02	1.423131e+01	-1.062282e+01	-1.590878e+01	-2.664745e+01	-4.076289e+01	2.178063e+00	-1.193717e+01	2.564111e+01	1.283229e+02	-1.511355e+00	-2.581355e+01
7.030000e+02	3.570986e+03	5.021588e+01	-2.276381e+01	7.348213e+00	8.288616e+00	4.225836e+01	1.705836e+02	1.317569e+01	-1.134734e+01	-1.915741e+01	-2.858120e+01	-4.368041e+01	3.804102e-01	-1.471864e+01	2.378027e+01	1.192298e+02	-3.704392e+00	-2.731613e+01
7.040000e+02	3.497322e+03	7.955565e+01	-2.093854e+01	1.208261e+01	2.278657e+01	2.722450e+01	1.697700e+02	1.403106e+01	-1.022676e+01	-1.887403e+01	-2.725748e+01	-4.313183e+01	3.089242e+00	-1.278498e+01	2.562501e+01	1.196131e+02	-4.343667e+00	-2.549936e+01
7.050000e+02	3.432573e+03	1.178123e+02	-1.827258e+01	2.557732e+01	5.238624e+01	1.253660e+01	1.767929e+02	1.594746e+01	-8.086782e+00	-1.656264e+01	-2.423449e+01	-4.059685e+01	8.387057e+00	-7.975195e+00	2.918486e+01	1.287345e+02	-4.281865e+00	-2.138871e+01
7.060000e+02	3.386164e+03	1.548672e+02	-1.659217e+01	4.313120e+01	9.069155e+01	-1.251313e+00	1.884244e+02	1.787618e+01	-5.981586e+00	-1.430192e+01	-2.169134e+01	-3.815964e+01	1.367098e+01	-2.797227e+00	3.186636e+01	1.430883e+02	-4.654330e+00	-1.642065e+01
7.070000e+02	3.366264e+03	1.805323e+02	-1.753753e+01	5.877844e+01	1.291171e+02	-1.360952e+01	1.997820e+02	1.880171e+01	-4.979322e+00	-1.429781e+01	-2.193462e+01	-3.807882e+01	1.625594e+01	1.118309e-01	3.104900e+01	1.574965e+02	-6.613738e+00	-1.213354e+01
7.080000e+02	3.377880e+03	1.861285e+02	-2.256289e+01	6.668924e+01	1.587922e+02	-2.401872e+01	2.055587e+02	1.791671e+01	-5.959746e+00	-1.843577e+01	-2.688487e+01	-4.231224e+01	1.391506e+01	-1.512210e+00	2.459685e+01	1.663295e+02	-1.105839e+01	-9.861663e+00
7.090000e+02	3.422124e+03	1.655445e+02	-3.296422e+01	6.211815e+01	1.721737e+02	-3.224478e+01	2.010985e+02	1.472418e+01	-9.455200e+00	-2.791142e+01	-3.765913e+01	-5.209088e+01	5.248566e+00	-9.183059e+00	1.121555e+01	1.646159e+02	-1.841801e+01	-1.049046e+01
7.100000e+02	3.496884e+03	1.159752e+02	-4.972501e+01	4.198252e+01	1.642040e+02	-3.865350e+01	1.832047e+02	9.077893e+00	-1.555340e+01	-4.298855e+01	-5.432437e+01	-6.762005e+01	-1.014506e+01	-2.344060e+01	-9.362345e+00	1.489210e+02	-2.854238e+01	-1.431137e+01
7.110000e+02	3.598375e+03	3.834309e+01	-7.319264e+01	5.220252e+00	1.329734e+02	-4.432174e+01	1.506315e+02	1.179737e+00	-2.387372e+01	-6.291435e+01	-7.585502e+01	-8.796816e+01	-3.166199e+01	-4.377496e+01	-3.633308e+01	1.179158e+02	-4.070977e+01	-2.099582e+01
7.120000e+02	3.722554e+03	-6.276843e+01	-1.027846e+02	-4.704685e+01	7.986686e+01	-5.085294e+01	1.042234e+02	-8.455272e+00	-3.362503e+01	-8.601085e+01	-1.002971e+02	-1.111811e+02	-5.780145e+01	-6.868525e+01	-6.788401e+01	7.256297e+01	-5.374469e+01	-2.969097e+01
7.130000e+02	3.865482e+03	-1.797965e+02	-1.369356e+02	-1.116378e+02	9.196657e+00	-5.997443e+01	4.668879e+01	-1.906616e+01	-4.374534e+01	-1.099444e+02	-1.251146e+02	-1.346243e+02	-8.635996e+01	-9.586947e+01	-1.013545e+02	1.588266e+01	-6.621495e+01	-3.921865e+01
7.140000e+02	4.022318e+03	-3.033733e+02	-1.733440e+02	-1.837905e+02	-7.259784e+01	-7.307230e+01	-1.792390e+01	-2.974764e+01	-5.310560e+01	-1.321392e+02	-1.476593e+02	-1.554980e+02	-1.147026e+02	-1.225410e+02	-1.335112e+02	-4.763690e+01	-7.666747e+01	-4.833484e+01
7.150000e+02	4.185582e+03	-4.236645e+02	-2.094030e+02	-2.579046e+02	-1.579924e+02	-9.079385e+01	-8.488447e+01	-3.957884e+01	-6.073575e+01	-1.502502e+02	-1.656662e+02	-1.714082e+02	-1.401011e+02	-1.458428e+02	-1.609464e+02	-1.128118e+02	-8.385924e+01	-5.598585e+01
7.160000e+02	4.343853e+03	-5.315563e+02	-2.426296e+02	-3.283286e+02	-2.394236e+02	-1.127851e+02	-1.493905e+02	-4.775735e+01	-6.601386e+01	-1.625799e+02	-1.776502e+02	-1.808377e+02	-1.601051e+02	-1.632923e+02	-1.805697e+02	-1.745080e+02	-8.694416e+01	-6.149394e+01
7.170000e+02	4.482038e+03	-6.196088e+02	-2.709918e+02	-3.899964e+02	-3.101704e+02	-1.376075e+02	-2.070270e+02	-5.371061e+01	-6.876334e+01	-1.683273e+02	-1.831022e+02	-1.833813e+02	-1.728903e+02	-1.731692e+02	-1.901162e+02	-2.282238e+02	-8.558893e+01	-6.462777e+01
7.180000e+02	4.583521e+03	-6.829257e+02	-2.931579e+02	-4.388915e+02	-3.650498e+02	-1.628984e+02	-2.541188e+02	-5.716445e+01	-6.923293e+01	-1.676242e+02	-1.824499e+02	-1.796940e+02	-1.775268e+02	-1.747708e+02	-1.885754e+02	-2.705090e+02	-8.001138e+01	-6.555693e+01
7.190000e+02	4.633537e+03	-7.200796e+02	-3.087548e+02	-4.724747e+02	-4.010109e+02	-1.858467e+02	-2.880993e+02	-5.816688e+01	-6.797793e+01	-1.613976e+02	-1.768415e+02	-1.712101e+02	-1.741324e+02	-1.685008e+02	-1.764533e+02	-2.993101e+02	-7.095474e+01	-6.473552e+01
7.200000e+02	4.622429e+03	-7.339564e+02	-3.186374e+02	-4.902056e+02	-4.176769e+02	-2.039718e+02	-3.079698e+02	-5.708016e+01	-6.569595e+01	-1.511561e+02	-1.678743e+02	-1.597733e+02	-1.639036e+02	-1.558025e+02	-1.558171e+02	-3.143029e+02	-5.961980e+01	-6.278046e+01
7.210000e+02	4.547599e+03	-7.320282e+02	-3.250293e+02	-4.940741e+02	-4.177216e+02	-2.160259e+02	-3.147473e+02	-5.455439e+01	-6.307854e+01	-1.387954e+02	-1.573769e+02	-1.473208e+02	-1.490266e+02	-1.389706e+02	-1.301031e+02	-3.171446e+02	-4.756814e+01	-6.039540e+01
7.220000e+02	4.413666e+03	-7.254672e+02	-3.313080e+02	-4.888077e+02	-4.068057e+02	-2.226780e+02	-3.116392e+02	-5.148205e+01	-6.071906e+01	-1.264567e+02	-1.472874e+02	-1.356949e+02	-1.324632e+02	-1.208708e+02	-1.036981e+02	-3.114531e+02	-3.658966e+01	-5.834726e+01
7.230000e+02	4.231239e+03	-7.268302e+02	-3.412857e+02	-4.813432e+02	-3.927896e+02	-2.266103e+02	-3.036666e+02	-4.891792e+01	-5.908141e+01	-1.163939e+02	-1.395762e+02	-1.265584e+02	-1.176034e+02	-1.045858e+02	-8.132833e+01	-3.023131e+02	-2.851403e+01	-5.745914e+01
7.240000e+02	4.015113e+03	-7.466778e+02	-3.580652e+02	-4.793767e+02	-3.841477e+02	-2.318299e+02	-2.966388e+02	-4.794811e+01	-5.850510e+01	-1.107741e+02	-1.361190e+02	-1.213321e+02	-1.077923e+02	-9.300560e+01	-6.732760e+01	-2.952623e+02	-2.495409e+01	-5.856510e+01
7.250000e+02	3.782537e+03	-7.901240e+02	-3.828088e+02	-4.892455e+02	-3.878631e+02	-2.423222e+02	-2.956809e+02	-4.951127e+01	-5.921221e+01	-1.113710e+02	-1.384558e+02	-1.210728e+02	-1.057843e+02	-8.840149e+01	-6.489343e+01	-2.949496e+02	-2.700122e+01	-6.239223e+01
7.260000e+02	3.551637e+03	-8.545815e+02	-4.138997e+02	-5.138144e+02	-4.073968e+02	-2.604897e+02	-3.037727e+02	-5.420400e+01	-6.129322e+01	-1.191889e+02	-1.474521e+02	-1.262788e+02	-1.132215e+02	-9.204857e+01	-7.547344e+01	-3.038639e+02	-3.493419e+01	-6.937935e+01
7.270000e+02	3.339760e+03	-9.297039e+02	-4.469064e+02	-5.511863e+02	-4.414333e+02	-2.859715e+02	-3.208274e+02	-6.212324e+01	-6.467080e+01	-1.341316e+02	-1.629626e+02	-1.366798e+02	-1.302553e+02	-1.039728e+02	-9.841792e+01	-3.215755e+02	-4.803001e+01	-7.948603e+01
7.280000e+02	3.161568e+03	-9.998041e+02	-4.754916e+02	-5.948350e+02	-4.839352e+02	-3.153361e+02	-3.436801e+02	-7.279657e+01	-6.906241e+01	-1.548453e+02	-1.836357e+02	-1.511117e+02	-1.554132e+02	-1.228895e+02	-1.309965e+02	-3.448016e+02	-6.456216e+01	-9.206749e+01
7.290000e+02	3.027129e+03	-1.048129e+03	-4.930493e+02	-6.352511e+02	-5.256299e+02	-3.428185e+02	-3.670340e+02	-8.522852e+01	-7.397405e+01	-1.788259e+02	-2.069686e+02	-1.675719e+02	-1.857649e+02	-1.463685e+02	-1.688088e+02	-3.683281e+02	-8.203399e+01	-1.058807e+02
7.300000e+02	2.940655e+03	-1.061654e+03	-4.945541e+02	-6.626186e+02	-5.565585e+02	-3.618808e+02	-3.850636e+02	-9.805714e+01	-7.875287e+01	-2.028005e+02	-2.296565e+02	-1.834967e+02	-2.173799e+02	-1.712205e+02	-2.065387e+02	-3.865209e+02	-9.763232e+01	-1.192506e+02
7.310000e+02	2.900475e+03	-1.034800e+03	-4.779981e+02	-6.696457e+02	-5.689172e+02	-3.670650e+02	-3.931327e+02	-1.097867e+02	-8.270600e+01	-2.233103e+02	-2.481867e+02	-1.962300e+02	-2.460070e+02	-1.940507e+02	-2.389255e+02	-3.949396e+02	-1.088146e+02	-1.303755e+02
7.320000e+02	2.900455e+03	-9.708398e+02	-4.449185e+02	-6.536039e+02	-5.592688e+02	-3.555191e+02	-3.890518e+02	-1.190455e+02	-8.526098e+01	-2.373653e+02	-2.595548e+02	-2.035812e+02	-2.678511e+02	-2.118778e+02	-2.617539e+02	-3.915211e+02	-1.138845e+02	-1.377035e+02
7.330000e+02	2.932547e+03	-8.805298e+02	-3.998392e+02	-6.169118e+02	-5.293840e+02	-3.277153e+02	-3.734755e+02	-1.248141e+02	-8.611545e+01	-2.430190e+02	-2.619236e+02	-2.043209e+02	-2.802820e+02	-2.226797e+02	-2.726324e+02	-3.769478e+02	-1.123878e+02	-1.402790e+02
7.340000e+02	2.989787e+03	-7.785144e+02	-3.488395e+02	-5.661146e+02	-4.854310e+02	-2.871888e+02	-3.493671e+02	-1.265796e+02	-8.531576e+01	-2.397236e+02	-2.550397e+02	-1.984602e+02	-2.823032e+02	-2.257241e+02	-2.713550e+02	-3.541138e+02	-1.051971e+02	-1.379610e+02
7.350000e+02	3.069018e+03	-6.788142e+02	-2.977671e+02	-5.096696e+02	-4.358184e+02	-2.394621e+02	-3.207962e+02	-1.243898e+02	-8.322802e+01	-2.283763e+02	-2.402761e+02	-1.872151e+02	-2.746527e+02	-2.215921e+02	-2.597432e+02	-3.269318e+02	-9.424277e+01	-1.314443e+02
7.360000e+02	3.172606e+03	-5.909569e+02	-2.507137e+02	-4.553427e+02	-3.884705e+02	-1.905659e+02	-2.915613e+02	-1.188081e+02	-8.041228e+01	-2.110551e+02	-2.202749e+02	-1.726599e+02	-2.595148e+02	-2.119003e+02	-2.410304e+02	-2.989567e+02	-8.197246e+01	-1.220797e+02
7.370000e+02	3.308603e+03	-5.179501e+02	-2.092285e+02	-4.081078e+02	-3.484830e+02	-1.456370e+02	-2.641419e+02	-1.107951e+02	-7.745569e+01	-1.905218e+02	-1.982946e+02	-1.571830e+02	-2.399389e+02	-1.988276e+02	-2.189980e+02	-2.723366e+02	-7.071360e+01	-1.115490e+02
7.380000e+02	3.488896e+03	-4.564980e+02	-1.724207e+02	-3.691801e+02	-3.169015e+02	-1.079657e+02	-2.392960e+02	-1.015480e+02	-7.483253e+01	-1.696305e+02	-1.774527e+02	-1.429157e+02	-2.191417e+02	-1.846049e+02	-1.971351e+02	-2.474237e+02	-6.213965e+01	-1.014901e+02
7.390000e+02	3.725308e+03	-3.990028e+02	-1.377531e+02	-3.363302e+02	-2.908892e+02	-7.864803e+01	-2.163113e+02	-9.232096e+01	-7.283006e+01	-1.507760e+02	-1.600648e+02	-1.312858e+02	-1.998728e+02	-1.710939e+02	-1.780337e+02	-2.230768e+02	-5.697567e+01	-9.316094e+01
7.400000e+02	4.024233e+03	-3.363748e+02	-1.021139e+02	-3.051278e+02	-2.650317e+02	-5.678186e+01	-1.936544e+02	-8.423305e+01	-7.152945e+01	-1.354722e+02	-1.472140e+02	-1.227692e+02	-1.839499e+02	-1.595050e+02	-1.630915e+02	-1.974064e+02	-5.497087e+01	-8.719845e+01
7.410000e+02	4.381273e+03	-2.606887e+02	-6.277275e+01	-2.705012e+02	-2.331995e+02	-4.001638e+01	-1.696623e+02	-7.806785e+01	-7.080056e+01	-1.241049e+02	-1.386017e+02	-1.168382e+02	-1.720029e+02	-1.502391e+02	-1.524723e+02	-1.685916e+02	-5.507526e+01	-8.349527e+01
7.420000e+02	4.777889e+03	-1.671628e+02	-1.804378e+01	-2.280729e+02	-1.903535e+02	-2.527189e+01	-1.430270e+02	-7.409447e+01	-7.028418e+01	-1.158925e+02	-1.326774e+02	-1.120827e+02	-1.634302e+02	-1.428350e+02	-1.452426e+02	-1.354740e+02	-5.573034e+01	-8.120496e+01
7.430000e+02	5.181914e+03	-5.545622e+01	3.227332e+01	-1.750747e+02	-1.338997e+02	-9.529306e+00	-1.130442e+02	-7.197303e+01	-6.938531e+01	-1.090970e+02	-1.270399e+02	-1.065097e+02	-1.565949e+02	-1.360640e+02	-1.396527e+02	-9.784662e+01	-5.521499e+01	-7.889425e+01
7.440000e+02	5.552746e+03	6.948751e+01	8.649646e+01	-1.109920e+02	-6.447360e+01	9.340590e+00	-7.978592e+01	-7.082050e+01	-6.734187e+01	-1.015203e+02	-1.190911e+02	-9.804198e+01	-1.492968e+02	-1.282469e+02	-1.335946e+02	-5.655577e+01	-5.202633e+01	-7.485827e+01
7.450000e+02	5.850282e+03	1.970041e+02	1.406518e+02	-3.819033e+01	1.378910e+01	3.176281e+01	-4.436701e+01	-6.947449e+01	-6.342254e+01	-9.124383e+01	-1.068639e+02	-8.519210e+01	-1.394990e+02	-1.178265e+02	-1.252434e+02	-1.359201e+01	-4.527451e+01	-6.757743e+01
7.460000e+02	6.045048e+03	3.110225e+02	1.882510e+02	3.744773e+01	9.345079e+01	5.582846e+01	-9.312034e+00	-6.690838e+01	-5.723678e+01	-7.744107e+01	-8.983543e+01	-6.776967e+01	-1.261560e+02	-1.040895e+02	-1.137772e+02	2.777024e+01	-3.502193e+01	-5.622392e+01
7.470000e+02	6.126207e+03	3.916908e+02	2.206392e+02	1.062307e+02	1.644949e+02	7.712955e+01	2.120886e+01	-6.266156e+01	-4.904996e+01	-6.098035e+01	-6.944523e+01	-4.736895e+01	-1.098617e+02	-8.778460e+01	-9.993440e+01	6.292402e+01	-2.244630e+01	-4.106235e+01
7.480000e+02	6.104534e+03	4.186234e+02	2.282254e+02	1.552932e+02	2.156743e+02	8.931986e+01	4.161681e+01	-5.710890e+01	-3.994787e+01	-4.453111e+01	-4.905087e+01	-2.737030e+01	-9.301304e+01	-7.133170e+01	-8.612804e+01	8.623710e+01	-9.712054e+00	-2.357923e+01
7.490000e+02	6.009149e+03	3.753873e+02	2.025630e+02	1.705648e+02	2.364552e+02	8.545968e+01	4.585528e+01	-5.143616e+01	-3.172940e+01	-3.203314e+01	-3.322198e+01	-1.232666e+01	-7.932895e+01	-5.843292e+01	-7.596342e+01	9.191169e+01	4.799655e-01	-6.248104e+00
7.500000e+02	5.878895e+03	2.540887e+02	1.387930e+02	1.399230e+02	2.192545e+02	5.987937e+01	2.891094e+01	-4.730258e+01	-2.651474e+01	-2.763450e+01	-2.653017e+01	-6.847002e+00	-7.282095e+01	-5.313716e+01	-7.324661e+01	7.533575e+01	5.561268e+00	8.031928e+00
7.510000e+02	5.751185e+03	5.855450e+01	3.766148e+01	5.672686e+01	1.614025e+02	1.001796e+01	-1.153287e+01	-4.630315e+01	-2.618271e+01	-3.443409e+01	-3.222042e+01	-1.431406e+01	-7.656290e+01	-5.865601e+01	-8.081105e+01	3.455701e+01	3.772246e+00	1.665425e+01
7.520000e+02	5.652036e+03	-1.951036e+02	-9.364835e+01	-7.744610e+01	6.620073e+01	-6.238176e+01	-7.393775e+01	-4.942738e+01	-3.182926e+01	-5.346160e+01	-5.122154e+01	-3.586395e+01	-9.170695e+01	-7.634893e+01	-9.958537e+01	-2.866396e+01	-5.382991e+00	1.794237e+01
7.530000e+02	5.590538e+03	-4.809067e+02	-2.422693e+02	-2.519052e+02	-5.734139e+01	-1.511550e+02	-1.527476e+02	-5.671013e+01	-4.343176e+01	-8.324154e+01	-8.182857e+01	-6.996367e+01	-1.170938e+02	-1.052286e+02	-1.282307e+02	-1.086869e+02	-2.104894e+01	1.150285e+01
7.540000e+02	5.559337e+03	-7.677723e+02	-3.918609e+02	-4.482451e+02	-1.960845e+02	-2.467432e+02	-2.393510e+02	-6.718883e+01	-5.982208e+01	-1.200672e+02	-1.201321e+02	-1.127009e+02	-1.495601e+02	-1.421288e+02	-1.634436e+02	-1.968678e+02	-4.130104e+01	-1.793881e+00
7.550000e+02	5.540453e+03	-1.025260e+03	-5.256833e+02	-6.437172e+02	-3.352107e+02	-3.380614e+02	-3.238654e+02	-7.916317e+01	-7.895978e+01	-1.588615e+02	-1.610031e+02	-1.586585e+02	-1.847806e+02	-1.824360e+02	-2.007727e+02	-2.832432e+02	-6.366976e+01	-2.014908e+01
7.560000e+02	5.513764e+03	-1.228735e+03	-6.296919e+02	-8.156226e+02	-4.608493e+02	-4.146563e+02	-3.971475e+02	-9.065169e+01	-9.840478e+01	-1.943304e+02	-1.992809e+02	-2.020838e+02	-2.183194e+02	-2.211222e+02	-2.356482e+02	-3.584974e+02	-8.571406e+01	-4.132820e+01
7.570000e+02	5.464699e+03	-1.362705e+03	-6.948447e+02	-9.455101e+02	-5.621907e+02	-4.685735e+02	-4.524038e+02	-9.988947e+01	-1.158433e+02	-2.220693e+02	-2.308028e+02	-2.380233e+02	-2.465492e+02	-2.537698e+02	-2.643046e+02	-4.156178e+02	-1.054691e+02	-6.312832e+01
7.580000e+02	5.388298e+03	-1.421752e+03	-7.180915e+02	-1.022098e+03	-6.326357e+02	-4.954932e+02	-4.859823e+02	-1.057187e+02	-1.295255e+02	-2.393501e+02	-2.530240e+02	-2.631571e+02	-2.672032e+02	-2.773363e+02	-2.843725e+02	-4.508071e+02	-1.216679e+02	-8.369270e+01
7.590000e+02	5.288668e+03	-1.409211e+03	-7.019222e+02	-1.042293e+03	-6.698786e+02	-4.949440e+02	-4.972627e+02	-1.077744e+02	-1.385138e+02	-2.454403e+02	-2.651461e+02	-2.761798e+02	-2.794851e+02	-2.905188e+02	-2.950515e+02	-4.635124e+02	-1.337301e+02	-1.016352e+02
7.600000e+02	5.174930e+03	-1.334378e+03	-6.527830e+02	-1.010285e+03	-6.751368e+02	-4.696649e+02	-4.878723e+02	-1.064364e+02	-1.426996e+02	-2.414425e+02	-2.678203e+02	-2.777056e+02	-2.838038e+02	-2.936891e+02	-2.969034e+02	-4.557363e+02	-1.415838e+02	-1.160148e+02
7.610000e+02	5.056241e+03	-1.209292e+03	-5.789594e+02	-9.352302e+02	-6.519406e+02	-4.244050e+02	-4.606302e+02	-1.025858e+02	-1.426151e+02	-2.297496e+02	-2.625917e+02	-2.697787e+02	-2.812898e+02	-2.884767e+02	-2.913917e+02	-4.309815e+02	-1.454255e+02	-1.262365e+02
7.620000e+02	4.938556e+03	-1.046116e+03	-4.886135e+02	-8.284192e+02	-6.049246e+02	-3.645684e+02	-4.186261e+02	-9.725380e+01	-1.391183e+02	-2.132880e+02	-2.512847e+02	-2.551523e+02	-2.732761e+02	-2.771436e+02	-2.803337e+02	-3.932154e+02	-1.455164e+02	-1.319446e+02
7.630000e+02	4.824567e+03	-8.557031e+02	-3.885018e+02	-7.007948e+02	-5.389529e+02	-2.951030e+02	-3.646917e+02	-9.127580e+01	-1.330635e+02	-1.947544e+02	-2.355015e+02	-2.365419e+02	-2.608967e+02	-2.619370e+02	-2.654217e+02	-3.461299e+02	-1.420773e+02	-1.329473e+02
7.640000e+02	4.716398e+03	-6.474428e+02	-2.835943e+02	-5.614473e+02	-4.587073e+02	-2.199072e+02	-3.013185e+02	-8.505933e+01	-1.250614e+02	-1.760429e+02	-2.163468e+02	-2.160449e+02	-2.448945e+02	-2.445924e+02	-2.479280e+02	-2.927983e+02	-1.352925e+02	-1.291853e+02
7.650000e+02	4.619052e+03	-4.300238e+02	-1.774822e+02	-4.172470e+02	-3.686718e+02	-1.418288e+02	-2.308955e+02	-7.853754e+01	-1.153994e+02	-1.580036e+02	-1.944130e+02	-1.948654e+02	-2.256540e+02	-2.261062e+02	-2.286366e+02	-2.356711e+02	-1.253940e+02	-1.207465e+02
7.660000e+02	4.542206e+03	-2.125078e+02	-7.323154e+01	-2.733712e+02	-2.733293e+02	-6.313051e+01	-1.560542e+02	-7.132553e+01	-1.041337e+02	-1.405817e+02	-1.699913e+02	-1.733900e+02	-2.034146e+02	-2.068129e+02	-2.079804e+02	-1.767669e+02	-1.127735e+02	-1.079238e+02
7.670000e+02	4.498829e+03	-5.152191e+00	2.572809e+01	-1.342610e+02	-1.773705e+02	1.383412e+01	-7.993435e+01	-6.302961e+01	-9.130944e+01	-1.232756e+02	-1.434253e+02	-1.515556e+02	-1.785770e+02	-1.867069e+02	-1.863091e+02	-1.179255e+02	-9.807703e+01	-9.131149e+01
7.680000e+02	4.500845e+03	1.804202e+02	1.150351e+02	-4.533589e+00	-8.578243e+01	8.602923e+01	-6.262072e+00	-5.360221e+01	-7.721794e+01	-1.057509e+02	-1.154883e+02	-1.293669e+02	-1.520006e+02	-1.658787e+02	-1.641840e+02	-6.103939e+01	-8.225011e+01	-7.191103e+01
7.690000e+02	4.553661e+03	3.318921e+02	1.893698e+02	1.104834e+02	-3.752974e+00	1.494762e+02	6.077744e+01	-4.360535e+01	-6.258564e+01	-8.838663e+01	-8.765233e+01	-1.073674e+02	-1.251843e+02	-1.448987e+02	-1.425943e+02	-8.227636e+00	-6.651577e+01	-5.119618e+01
7.700000e+02	4.652040e+03	4.377573e+02	2.430412e+02	2.047720e+02	6.362505e+01	1.994711e+02	1.168591e+02	-3.426023e+01	-4.860102e+01	-7.253705e+01	-6.212568e+01	-8.687847e+01	-1.002402e+02	-1.249922e+02	-1.230009e+02	3.808479e+01	-5.227230e+01	-3.106926e+01
7.710000e+02	4.779238e+03	4.894411e+02	2.710856e+02	2.722389e+02	1.118612e+02	2.312955e+02	1.580110e+02	-2.722539e+01	-3.673747e+01	-6.037158e+01	-4.158130e+01	-6.988439e+01	-7.961095e+01	-1.079132e+02	-1.071572e+02	7.525045e+01	-4.090698e+01	-1.365881e+01
7.720000e+02	4.909892e+03	4.835519e+02	2.705967e+02	3.078470e+02	1.377633e+02	2.412899e+02	1.812548e+02	-2.414542e+01	-2.840327e+01	-5.430282e+01	-2.859135e+01	-5.856148e+01	-6.555674e+01	-9.552593e+01	-9.672177e+01	1.007144e+02	-3.354313e+01	-9.618156e-01
7.730000e+02	5.015638e+03	4.235341e+02	2.418570e+02	3.090166e+02	1.402098e+02	2.280017e+02	1.852988e+02	-2.611193e+01	-2.452633e+01	-5.617310e+01	-2.490458e+01	-5.458831e+01	-5.953896e+01	-8.922174e+01	-9.276580e+01	1.125573e+02	-3.077255e+01	5.591806e+00
7.740000e+02	5.071539e+03	3.199258e+02	1.887978e+02	2.768601e+02	1.207510e+02	1.930183e+02	1.710873e+02	-3.323291e+01	-2.522436e+01	-6.649060e+01	-3.080530e+01	-5.848281e+01	-6.170402e+01	-8.938065e+01	-9.534341e+01	1.101218e+02	-3.245781e+01	5.514720e+00
7.750000e+02	5.061380e+03	1.887168e+02	1.184666e+02	2.167021e+02	8.371629e+01	1.411029e+02	1.419360e+02	-4.448483e+01	-2.969742e+01	-8.402214e+01	-4.481689e+01	-6.923539e+01	-7.068229e+01	-9.510000e+01	-1.033073e+02	9.445423e+01	-3.769261e+01	-5.688966e-01
7.760000e+02	4.980518e+03	4.795497e+01	3.952242e+01	1.374485e+02	3.557391e+01	7.942644e+01	1.030459e+02	-5.792388e+01	-3.640446e+01	-1.059393e+02	-6.392241e+01	-8.442042e+01	-8.382915e+01	-1.043265e+02	-1.144826e+02	6.828543e+01	-4.496999e+01	-1.105081e+01
7.770000e+02	4.835900e+03	-8.646894e+01	-3.981264e+01	4.975130e+01	-1.644176e+01	1.600419e+01	6.039568e+01	-7.119632e+01	-4.347716e+01	-1.285101e+02	-8.429012e+01	-1.007913e+02	-9.787473e+01	-1.143755e+02	-1.261801e+02	3.543878e+01	-5.253481e+01	-2.374707e+01
7.780000e+02	4.643622e+03	-2.043982e+02	-1.136183e+02	-3.654169e+01	-6.606546e+01	-4.221641e+01	1.930446e+01	-8.217142e+01	-4.922896e+01	-1.481095e+02	-1.022862e+02	-1.151672e+02	-1.097805e+02	-1.226611e+02	-1.358860e+02	-1.741639e-01	-5.881784e+01	-3.646218e+01
7.790000e+02	4.424841e+03	-3.029664e+02	-1.792359e+02	-1.147420e+02	-1.094709e+02	-9.096776e+01	-1.683168e+01	-8.947342e+01	-5.257687e+01	-1.621862e+02	-1.154259e+02	-1.252896e+02	-1.175067e+02	-1.273704e+02	-1.418828e+02	-3.557300e+01	-6.280433e+01	-4.751900e+01
7.800000e+02	4.201123e+03	-3.854941e+02	-2.369404e+02	-1.825224e+02	-1.458627e+02	-1.293809e+02	-4.712989e+01	-9.273223e+01	-5.322813e+01	-1.698341e+02	-1.229226e+02	-1.303298e+02	-1.204226e+02	-1.278299e+02	-1.435729e+02	-6.929205e+01	-6.420439e+01	-5.607453e+01
7.810000e+02	3.990318e+03	-4.582171e+02	-2.884979e+02	-2.414360e+02	-1.769153e+02	-1.595393e+02	-7.289027e+01	-9.248407e+01	-5.157786e+01	-1.717720e+02	-1.256477e+02	-1.308656e+02	-1.192290e+02	-1.244470e+02	-1.413994e+02	-1.012633e+02	-6.336706e+01	-6.212418e+01
7.820000e+02	3.803998e+03	-5.263348e+02	-3.353043e+02	-2.949691e+02	-2.053032e+02	-1.850627e+02	-9.649645e+01	-8.978726e+01	-4.837953e+01	-1.697761e+02	-1.255448e+02	-1.283680e+02	-1.154579e+02	-1.182814e+02	-1.364275e+02	-1.320765e+02	-6.098488e+01	-6.621950e+01
7.830000e+02	3.647106e+03	-5.912066e+02	-3.770110e+02	-3.460475e+02	-2.330137e+02	-2.093208e+02	-1.200502e+02	-8.572058e+01	-4.433861e+01	-1.658206e+02	-1.247508e+02	-1.244383e+02	-1.107727e+02	-1.104607e+02	-1.297903e+02	-1.620179e+02	-5.772554e+01	-6.903576e+01
7.840000e+02	3.519874e+03	-6.499989e+02	-4.113296e+02	-3.952036e+02	-2.602634e+02	-2.340357e+02	-1.443661e+02	-8.096577e+01	-3.980576e+01	-1.612933e+02	-1.247826e+02	-1.201330e+02	-1.063573e+02	-1.017082e+02	-1.222559e+02	-1.904111e+02	-5.395873e+01	-7.098080e+01
7.850000e+02	3.421285e+03	-6.978874e+02	-4.351222e+02	-4.403032e+02	-2.855564e+02	-2.588462e+02	-1.687753e+02	-7.563103e+01	-3.469718e+01	-1.565954e+02	-1.260991e+02	-1.156614e+02	-1.026272e+02	-9.218990e+01	-1.141028e+02	-2.156373e+02	-4.970311e+01	-7.201159e+01
7.860000e+02	3.352713e+03	-7.316247e+02	-4.462276e+02	-4.779427e+02	-3.068508e+02	-2.819602e+02	-1.917858e+02	-6.936896e+01	-2.866608e+01	-1.512607e+02	-1.281765e+02	-1.105577e+02	-9.934515e+01	-8.172678e+01	-1.053369e+02	-2.358503e+02	-4.481324e+01	-7.172809e+01
7.870000e+02	3.320194e+03	-7.525206e+02	-4.450561e+02	-5.057544e+02	-3.232130e+02	-3.015021e+02	-2.122133e+02	-6.171917e+01	-2.143396e+01	-1.444942e+02	-1.300106e+02	-1.042089e+02	-9.604088e+01	-7.023957e+01	-9.611389e+01	-2.500179e+02	-3.930748e+01	-6.968583e+01
7.880000e+02	3.334133e+03	-7.670725e+02	-4.350510e+02	-5.243331e+02	-3.360331e+02	-3.168256e+02	-2.301388e+02	-5.251195e+01	-1.311497e+01	-1.358460e+02	-1.307757e+02	-9.644898e+01	-9.249705e+01	-5.817066e+01	-8.711319e+01	-2.587111e+02	-3.365850e+01	-6.576408e+01
7.890000e+02	3.406146e+03	-7.845774e+02	-4.216403e+02	-5.376264e+02	-3.490252e+02	-3.290703e+02	-2.471122e+02	-4.214337e+01	-4.366343e+00	-1.256806e+02	-1.303108e+02	-8.790350e+01	-8.903720e+01	-4.663020e+01	-7.962298e+01	-2.641378e+02	-2.887062e+01	-6.039586e+01
7.900000e+02	3.543807e+03	-8.125690e+02	-4.100499e+02	-5.513629e+02	-3.667880e+02	-3.406076e+02	-2.653807e+02	-3.158857e+01	3.722360e+00	-1.152018e+02	-1.291944e+02	-7.989084e+01	-8.644827e+01	-3.714493e+01	-7.522198e+01	-2.692710e+02	-2.625812e+01	-5.452735e+01
7.910000e+02	3.745038e+03	-8.521287e+02	-4.029504e+02	-5.700966e+02	-3.924231e+02	-3.535855e+02	-2.864241e+02	-2.213716e+01	9.965679e+00	-1.060103e+02	-1.283757e+02	-7.390740e+01	-8.555876e+01	-3.109063e+01	-7.514970e+01	-2.763806e+02	-2.698007e+01	-4.930401e+01
7.920000e+02	3.994302e+03	-8.954050e+02	-3.990519e+02	-5.942228e+02	-4.252565e+02	-3.682696e+02	-3.094908e+02	-1.496155e+01	1.349953e+01	-9.939770e+01	-1.285521e+02	-7.093653e+01	-8.668046e+01	-2.906509e+01	-7.963419e+01	-2.856267e+02	-3.151590e+01	-4.561784e+01
7.930000e+02	4.262499e+03	-9.268411e+02	-3.933705e+02	-6.184803e+02	-4.598034e+02	-3.820458e+02	-3.309214e+02	-1.070678e+01	1.409377e+01	-9.571897e+01	-1.296185e+02	-7.091830e+01	-8.921277e+01	-3.051280e+01	-8.750826e+01	-2.944251e+02	-3.931795e+01	-4.372667e+01
7.940000e+02	4.511423e+03	-9.279766e+02	-3.791283e+02	-6.328663e+02	-4.866727e+02	-3.896978e+02	-3.447577e+02	-9.280317e+00	1.222224e+01	-9.415143e+01	-1.304867e+02	-7.264872e+01	-9.164803e+01	-3.381031e+01	-9.634525e+01	-2.979994e+02	-4.881980e+01	-4.313002e+01
7.950000e+02	4.702040e+03	-8.840337e+02	-3.504995e+02	-6.258172e+02	-4.952797e+02	-3.849947e+02	-3.445595e+02	-9.927319e+00	8.864649e+00	-9.296649e+01	-1.293941e+02	-7.417435e+01	-9.202668e+01	-3.680735e+01	-1.031219e+02	-2.910099e+02	-5.783349e+01	-4.276769e+01
7.960000e+02	4.804349e+03	-7.896105e+02	-3.050379e+02	-5.884432e+02	-4.774079e+02	-3.629925e+02	-3.257655e+02	-1.154725e+01	5.135510e+00	-9.019662e+01	-1.245802e+02	-7.351371e+01	-8.866689e+01	-3.760091e+01	-1.051732e+02	-2.696352e+02	-6.419888e+01	-4.145503e+01
7.970000e+02	4.805596e+03	-6.511554e+02	-2.447960e+02	-5.180856e+02	-4.302185e+02	-3.220897e+02	-2.876245e+02	-1.310525e+01	1.904644e+00	-8.439812e+01	-1.150293e+02	-6.938811e+01	-8.085105e+01	-3.521052e+01	-1.010616e+02	-2.332460e+02	-6.643576e+01	-3.835986e+01
7.980000e+02	4.713946e+03	-4.853105e+02	-1.757672e+02	-4.197422e+02	-3.574952e+02	-2.649606e+02	-2.338704e+02	-1.396331e+01	-4.361756e-01	-7.517906e+01	-1.009437e+02	-6.165185e+01	-6.916513e+01	-2.987408e+01	-9.101675e+01	-1.849686e+02	-6.414790e+01	-3.331323e+01
7.990000e+02	4.556056e+03	-3.139793e+02	-1.060207e+02	-3.048531e+02	-2.686563e+02	-1.979922e+02	-1.718489e+02	-1.400889e+01	-1.984739e+00	-6.328770e+01	-8.374583e+01	-5.126354e+01	-5.534565e+01	-2.286425e+01	-7.678578e+01	-1.309198e+02	-5.803701e+01	-2.683222e+01
8.000000e+02	4.369190e+03	-1.582347e+02	-4.339306e+01	-1.880611e+02	-1.759952e+02	-1.295045e+02	-1.104649e+02	-1.355926e+01	-3.144858e+00	-5.026536e+01	-6.562334e+01	-3.985099e+01	-4.170792e+01	-1.593653e+01	-6.098400e+01	-7.846366e+01	-4.954992e+01	-1.986820e+01
8.010000e+02	4.190402e+03	-3.338421e+01	6.360488e+00	-8.332144e+01	-9.129792e+01	-6.751970e+01	-5.778293e+01	-1.311530e+01	-4.351985e+00	-3.785148e+01	-4.882634e+01	-2.908823e+01	-3.039774e+01	-1.066061e+01	-4.622498e+01	-3.421199e+01	-4.032549e+01	-1.341180e+01
8.020000e+02	4.046403e+03	5.331791e+01	4.040979e+01	-7.984423e-01	-2.310188e+01	-1.793294e+01	-1.916347e+01	-1.308788e+01	-5.834507e+00	-2.740484e+01	-3.500776e+01	-2.015156e+01	-2.275630e+01	-7.901047e+00	-3.436218e+01	-2.507560e+00	-3.166734e+01	-8.130914e+00
8.030000e+02	3.947415e+03	1.021392e+02	5.866765e+01	5.456937e+01	2.456932e+01	1.636100e+01	3.510773e+00	-1.360943e+01	-7.503977e+00	-1.955480e+01	-2.484345e+01	-1.344942e+01	-1.900922e+01	-7.616064e+00	-2.608713e+01	1.517056e+01	-2.422847e+01	-4.181912e+00
8.040000e+02	3.886897e+03	1.184852e+02	6.297506e+01	8.278335e+01	5.188469e+01	3.532237e+01	1.147834e+01	-1.448930e+01	-9.002004e+00	-1.416568e+01	-1.802391e+01	-8.678426e+00	-1.834111e+01	-8.996371e+00	-2.095985e+01	1.987770e+01	-1.798454e+01	-1.242547e+00
8.050000e+02	3.846915e+03	1.101053e+02	5.618656e+01	8.739159e+01	6.182724e+01	4.095494e+01	8.003306e+00	-1.530458e+01	-9.864753e+00	-1.055851e+01	-1.355319e+01	-5.118685e+00	-1.927147e+01	-1.083754e+01	-1.778024e+01	1.429862e+01	-1.245041e+01	1.281505e+00
8.060000e+02	3.806975e+03	8.507529e+01	4.155306e+01	7.384570e+01	5.857510e+01	3.634495e+01	-2.885783e+00	-1.556778e+01	-9.723693e+00	-7.847957e+00	-1.018906e+01	-2.003818e+00	-2.016006e+01	-1.197521e+01	-1.510874e+01	1.747528e+00	-7.010827e+00	3.985398e+00
8.070000e+02	3.752921e+03	5.102149e+01	2.251147e+01	4.827588e+01	4.633463e+01	2.495632e+01	-1.733856e+01	-1.489482e+01	-8.455789e+00	-5.242598e+00	-6.842871e+00	1.196534e+00	-1.966016e+01	-1.162096e+01	-1.173463e+01	-1.454164e+01	-1.218858e+00	7.244099e+00
8.080000e+02	3.682561e+03	1.527210e+01	2.712546e+00	1.691850e+01	2.891511e+01	1.031737e+01	-3.208865e+01	-1.311088e+01	-6.225605e+00	-2.209176e+00	-2.814014e+00	4.676248e+00	-1.699126e+01	-9.501023e+00	-6.954232e+00	-3.168183e+01	5.041045e+00	1.111566e+01
8.090000e+02	3.606030e+03	-1.485224e+01	-1.402439e+01	-1.400313e+01	9.882739e+00	-4.034055e+00	-4.440146e+01	-1.026752e+01	-3.411740e+00	1.519278e+00	2.175426e+00	8.375249e+00	-1.198731e+01	-5.787368e+00	-6.194945e-01	-4.705167e+01	1.155265e+01	1.538027e+01
8.100000e+02	3.541006e+03	-3.239288e+01	-2.409828e+01	-3.838529e+01	-7.156303e+00	-1.461964e+01	-5.184912e+01	-6.583902e+00	-4.592108e-01	6.042407e+00	8.096809e+00	1.216733e+01	-4.959908e+00	-8.891521e-01	6.993771e+00	-5.812383e+01	1.788689e+01	1.967092e+01
8.110000e+02	3.504956e+03	-3.209032e+01	-2.492090e+01	-5.074889e+01	-1.860998e+01	-1.834064e+01	-5.224330e+01	-2.352904e+00	2.272477e+00	1.141545e+01	1.478689e+01	1.604109e+01	3.530717e+00	4.785243e+00	1.539900e+01	-6.248341e+01	2.356083e+01	2.362430e+01
8.120000e+02	3.507697e+03	-1.237658e+01	-1.591492e+01	-4.728729e+01	-2.151706e+01	-1.310912e+01	-4.393444e+01	2.141335e+00	4.600537e+00	1.772030e+01	2.208146e+01	2.017978e+01	1.289197e+01	1.099068e+01	2.409396e+01	-5.819847e+01	2.816466e+01	2.698676e+01
8.130000e+02	3.547188e+03	2.287104e+01	7.052778e-01	-2.721862e+01	-1.458151e+01	1.376514e+00	-2.644937e+01	6.663498e+00	6.518384e+00	2.504750e+01	2.985551e+01	2.490269e+01	2.262670e+01	1.767431e+01	3.267569e+01	-4.449443e+01	3.142386e+01	2.964304e+01
8.140000e+02	3.609918e+03	6.387749e+01	1.983509e+01	6.119659e+00	8.401559e-01	2.304896e+01	-1.193615e+00	1.102137e+01	8.118753e+00	3.340199e+01	3.797083e+01	3.049968e+01	3.234999e+01	2.487932e+01	4.086399e+01	-2.246861e+01	3.320612e+01	3.157549e+01
8.150000e+02	3.675287e+03	9.650699e+01	3.434056e+01	4.509177e+01	2.036857e+01	4.744146e+01	2.818988e+01	1.503514e+01	9.491266e+00	4.258328e+01	4.617848e+01	3.703970e+01	4.172572e+01	3.258746e+01	4.846231e+01	4.534324e+00	3.350653e+01	3.279173e+01
8.160000e+02	3.721919e+03	1.056693e+02	3.678072e+01	7.892790e+01	3.723462e+01	6.840985e+01	5.614909e+01	1.851142e+01	1.065249e+01	5.210283e+01	5.404299e+01	4.424417e+01	5.038385e+01	4.058559e+01	5.529944e+01	3.120494e+01	3.243885e+01	3.326600e+01
8.170000e+02	3.733531e+03	7.958328e+01	2.148515e+01	9.615077e+01	4.389122e+01	7.951448e+01	7.632031e+01	2.124211e+01	1.154289e+01	6.118321e+01	6.093941e+01	5.148420e+01	5.787660e+01	4.842199e+01	6.118575e+01	5.129033e+01	3.023595e+01	3.292441e+01
8.180000e+02	3.702664e+03	1.336251e+01	-1.375338e+01	8.760096e+01	3.412332e+01	7.566645e+01	8.312423e+01	2.302876e+01	1.208484e+01	6.884772e+01	6.613520e+01	5.790395e+01	6.370068e+01	5.547005e+01	6.589572e+01	5.911114e+01	2.723966e+01	3.167637e+01
8.190000e+02	3.631716e+03	-8.945275e+01	-6.702111e+01	4.903083e+01	4.903106e+00	5.447831e+01	7.331993e+01	2.371577e+01	1.226153e+01	7.407300e+01	6.892699e+01	6.261885e+01	6.737332e+01	6.106581e+01	6.917065e+01	5.107611e+01	2.385710e+01	2.946973e+01
8.200000e+02	3.531596e+03	-2.179894e+02	-1.329070e+02	-1.769269e+01	-4.270160e+01	1.683477e+01	4.693581e+01	2.321266e+01	1.216641e+01	7.595810e+01	6.877875e+01	6.491186e+01	6.852283e+01	6.465657e+01	7.072977e+01	2.664889e+01	2.047925e+01	2.633681e+01
8.210000e+02	3.418738e+03	-3.572569e+02	-2.041229e+02	-1.052181e+02	-1.038818e+02	-3.350391e+01	7.223064e+00	2.149507e+01	1.199098e+01	7.386530e+01	6.541265e+01	6.436120e+01	6.695137e+01	6.590051e+01	7.028403e+01	-1.158018e+01	1.738454e+01	2.240656e+01
8.220000e+02	3.311188e+03	-4.921653e+02	-2.734419e+02	-2.028814e+02	-1.715121e+02	-9.106660e+01	-4.033292e+01	1.858991e+01	1.195210e+01	6.750730e+01	5.883086e+01	6.086948e+01	6.264641e+01	6.468557e+01	6.755407e+01	-5.870928e+01	1.466552e+01	1.787695e+01
8.230000e+02	3.224478e+03	-6.108487e+02	-3.352109e+02	-2.995419e+02	-2.380596e+02	-1.501145e+02	-8.954228e+01	1.456026e+01	1.219006e+01	5.697724e+01	4.927887e+01	5.460706e+01	5.574514e+01	6.107379e+01	6.229672e+01	-1.088813e+02	1.220963e+01	1.296071e+01
8.240000e+02	3.168071e+03	-7.062660e+02	-3.859672e+02	-3.860333e+02	-2.972817e+02	-2.058135e+02	-1.350087e+02	9.505099e+00	1.268173e+01	4.273497e+01	3.718245e+01	4.591168e+01	4.647776e+01	5.520733e+01	5.434194e+01	-1.566690e+02	9.741539e+00	7.828529e+00
8.250000e+02	3.143249e+03	-7.758884e+02	-4.241393e+02	-4.564818e+02	-3.452022e+02	-2.547697e+02	-1.731039e+02	3.580000e+00	1.320645e+01	2.556836e+01	2.309368e+01	3.519499e+01	3.512442e+01	4.722597e+01	4.364044e+01	-1.980416e+02	6.911050e+00	2.573851e+00
8.260000e+02	3.143173e+03	-8.200425e+02	-4.492008e+02	-5.083062e+02	-3.802010e+02	-2.948866e+02	-2.021938e+02	-2.967610e+00	1.338329e+01	6.544249e+00	7.667972e+00	2.289542e+01	2.201360e+01	3.724117e+01	3.032346e+01	-2.306965e+02	3.400577e+00	-2.784016e+00
8.270000e+02	3.155280e+03	-8.398804e+02	-4.608109e+02	-5.412577e+02	-4.023909e+02	-3.248012e+02	-2.222032e+02	-9.764899e+00	1.277481e+01	-1.304852e+01	-8.327980e+00	9.491553e+00	7.569917e+00	2.538948e+01	1.477516e+01	-2.538142e+02	-9.700852e-01	-8.254921e+00
8.280000e+02	3.165378e+03	-8.358894e+02	-4.583733e+02	-5.561448e+02	-4.126600e+02	-3.433034e+02	-2.338295e+02	-1.630314e+01	1.103115e+01	-3.177555e+01	-2.400101e+01	-4.440825e+00	-7.608259e+00	1.195188e+01	-2.294413e+00	-2.674846e+02	-6.158518e+00	-1.380314e+01
8.290000e+02	3.162069e+03	-8.074643e+02	-4.411738e+02	-5.538451e+02	-4.117910e+02	-3.490850e+02	-2.377767e+02	-2.196999e+01	8.030244e+00	-4.817354e+01	-3.834738e+01	-1.817284e+01	-2.268831e+01	-2.513860e+00	-1.981036e+01	-2.721114e+02	-1.185205e+01	-1.927098e+01
8.300000e+02	3.139958e+03	-7.535620e+02	-4.089605e+02	-5.349438e+02	-3.999702e+02	-3.409560e+02	-2.343009e+02	-2.613469e+01	3.963379e+00	-6.092324e+01	-5.033739e+01	-3.082471e+01	-3.661916e+01	-1.710660e+01	-3.638177e+01	-2.680298e+02	-1.748192e+01	-2.433843e+01
8.310000e+02	3.100471e+03	-6.740469e+02	-3.626484e+02	-4.999954e+02	-3.768216e+02	-3.184133e+02	-2.231839e+02	-2.827916e+01	-6.756947e-01	-6.907314e+01	-5.908436e+01	-4.146925e+01	-4.826785e+01	-3.065285e+01	-5.048541e+01	-2.554395e+02	-2.232104e+01	-2.855214e+01
8.320000e+02	3.050102e+03	-5.711461e+02	-3.048165e+02	-4.501542e+02	-3.419120e+02	-2.822742e+02	-2.040828e+02	-2.814738e+01	-5.211157e+00	-7.227540e+01	-6.407443e+01	-4.933882e+01	-5.667599e+01	-4.194049e+01	-6.078741e+01	-2.346174e+02	-2.566604e+01	-3.143465e+01
8.330000e+02	2.996959e+03	-4.504765e+02	-2.397954e+02	-3.878265e+02	-2.955294e+02	-2.350651e+02	-1.770744e+02	-2.587027e+01	-8.987450e+00	-7.096761e+01	-6.539246e+01	-5.408455e+01	-6.137512e+01	-5.006731e+01	-6.653778e+01	-2.062817e+02	-2.706764e+01	-3.265105e+01
8.340000e+02	2.947185e+03	-3.213068e+02	-1.733278e+02	-3.170581e+02	-2.394550e+02	-1.809756e+02	-1.431797e+02	-2.202130e+01	-1.159022e+01	-6.642751e+01	-6.385714e+01	-5.599631e+01	-6.265204e+01	-5.479130e+01	-6.791285e+01	-1.719496e+02	-2.653968e+01	-3.217971e+01
8.350000e+02	2.902860e+03	-1.959738e+02	-1.119302e+02	-2.435175e+02	-1.774598e+02	-1.253759e+02	-1.046800e+02	-1.757397e+01	-1.300943e+01	-6.065204e+01	-6.099121e+01	-5.608751e+01	-6.165005e+01	-5.674645e+01	-6.616692e+01	-1.341483e+02	-2.466802e+01	-3.042283e+01
8.360000e+02	2.862257e+03	-8.859738e+01	-6.214662e+01	-1.740918e+02	-1.153378e+02	-7.405836e+01	-6.512042e+01	-1.375963e+01	-1.368569e+01	-5.606203e+01	-5.880217e+01	-5.598822e+01	-6.023820e+01	-5.742433e+01	-6.350215e+01	-9.639756e+01	-2.256520e+01	-2.820813e+01
8.370000e+02	2.822189e+03	-1.339806e+01	-2.986867e+01	-1.162255e+02	-6.042060e+01	-3.243966e+01	-2.899921e+01	-1.185464e+01	-1.442191e+01	-5.508913e+01	-5.941540e+01	-5.765664e+01	-6.066270e+01	-5.890400e+01	-6.266040e+01	-6.295234e+01	-2.166768e+01	-2.666882e+01
8.380000e+02	2.781209e+03	1.702920e+01	-1.982713e+01	-7.717827e+01	-2.067139e+01	-4.935178e+00	-1.230357e+00	-1.294525e+01	-1.618779e+01	-5.974021e+01	-6.465534e+01	-6.298309e+01	-6.507506e+01	-6.340280e+01	-6.633898e+01	-3.836062e+01	-2.342554e+01	-2.702812e+01
8.390000e+02	2.741975e+03	-6.796660e+00	-3.527299e+01	-6.336006e+01	-3.566232e+00	5.376290e+00	1.348213e+01	-1.772244e+01	-1.987538e+01	-7.123809e+01	-7.568480e+01	-7.339145e+01	-7.506965e+01	-7.277620e+01	-7.658975e+01	-2.693659e+01	-2.896745e+01	-3.034130e+01
8.400000e+02	2.711544e+03	-9.009246e+01	-7.777402e+01	-7.980730e+01	-1.499627e+01	-3.195354e+00	1.123439e+01	-2.634516e+01	-2.607019e+01	-8.980448e+01	-9.278053e+01	-8.953000e+01	-9.134500e+01	-8.809422e+01	-9.435406e+01	-3.224218e+01	-3.882468e+01	-3.725407e+01
8.410000e+02	2.699308e+03	-2.329180e+02	-1.470022e+02	-1.297409e+02	-5.835355e+01	-3.106254e+01	-1.057748e+01	-3.838885e+01	-3.488750e+01	-1.146004e+02	-1.152653e+02	-1.110996e+02	-1.135420e+02	-1.093758e+02	-1.192254e+02	-5.662112e+01	-5.277266e+01	-4.782591e+01
8.420000e+02	2.713430e+03	-4.294301e+02	-2.404229e+02	-2.140564e+02	-1.338525e+02	-7.745784e+01	-5.282825e+01	-5.287673e+01	-4.590085e+01	-1.437993e+02	-1.415677e+02	-1.368240e+02	-1.402504e+02	-1.355060e+02	-1.494584e+02	-1.007730e+02	-6.981425e+01	-6.145067e+01
8.430000e+02	2.757325e+03	-6.673696e+02	-3.529347e+02	-3.306431e+02	-2.380846e+02	-1.403804e+02	-1.142706e+02	-6.838343e+01	-5.817148e+01	-1.747613e+02	-1.693709e+02	-1.645500e+02	-1.691480e+02	-1.643262e+02	-1.821926e+02	-1.633511e+02	-8.830171e+01	-7.689243e+01
8.440000e+02	2.827716e+03	-9.281676e+02	-4.766893e+02	-4.736391e+02	-3.638573e+02	-2.163862e+02	-1.912203e+02	-8.320287e+01	-7.037609e+01	-2.042996e+02	-1.958368e+02	-1.914735e+02	-1.972517e+02	-1.928873e+02	-2.138495e+02	-2.406401e+02	-1.061788e+02	-9.244267e+01
8.450000e+02	2.915092e+03	-1.188190e+03	-6.014028e+02	-6.329888e+02	-5.004843e+02	-3.003815e+02	-2.774780e+02	-9.557463e+01	-8.102093e+01	-2.290551e+02	-2.179261e+02	-2.145021e+02	-2.212849e+02	-2.178596e+02	-2.406637e+02	-3.264797e+02	-1.213132e+02	-1.061875e+02
8.460000e+02	3.006310e+03	-1.421380e+03	-7.153580e+02	-7.947887e+02	-6.347253e+02	-3.856732e+02	-3.646990e+02	-1.039539e+02	-8.871259e+01	-2.459808e+02	-2.328290e+02	-2.307403e+02	-2.381624e+02	-2.360723e+02	-2.592982e+02	-4.126395e+02	-1.318719e+02	-1.163463e+02
8.470000e+02	3.088190e+03	-1.602965e+03	-8.070033e+02	-9.427137e+02	-7.524270e+02	-4.644698e+02	-4.433269e+02	-1.072864e+02	-9.243218e+01	-2.528827e+02	-2.384659e+02	-2.380294e+02	-2.455406e+02	-2.451026e+02	-2.674469e+02	-4.897513e+02	-1.366671e+02	-1.216095e+02
8.480000e+02	3.150651e+03	-1.713324e+03	-8.667562e+02	-1.060374e+03	-8.406143e+02	-5.288353e+02	-5.039819e+02	-1.052250e+02	-9.174098e+01	-2.488871e+02	-2.339425e+02	-2.354039e+02	-2.423076e+02	-2.437676e+02	-2.642830e+02	-5.486802e+02	-1.353844e+02	-1.213877e+02
8.490000e+02	3.188311e+03	-1.740975e+03	-8.885091e+02	-1.134005e+03	-8.895156e+02	-5.718890e+02	-5.389781e+02	-9.821666e+01	-8.685230e+01	-2.346747e+02	-2.198043e+02	-2.233112e+02	-2.288557e+02	-2.323613e+02	-2.506079e+02	-5.820029e+02	-1.286180e+02	-1.158950e+02
8.500000e+02	3.200379e+03	-1.684043e+03	-8.704940e+02	-1.154745e+03	-8.939837e+02	-5.889382e+02	-5.435750e+02	-8.742008e+01	-7.854330e+01	-2.123734e+02	-1.979753e+02	-2.034975e+02	-2.070223e+02	-2.125434e+02	-2.286324e+02	-5.852007e+02	-1.176942e+02	-1.060453e+02
8.510000e+02	3.189447e+03	-1.550252e+03	-8.154639e+02	-1.119977e+03	-8.540341e+02	-5.782942e+02	-5.166985e+02	-7.446939e+01	-6.794108e+01	-1.851234e+02	-1.713837e+02	-1.785959e+02	-1.797084e+02	-1.869197e+02	-2.014546e+02	-5.573161e+02	-1.043380e+02	-9.320836e+01
8.520000e+02	3.160116e+03	-1.355939e+03	-7.303705e+02	-1.033664e+03	-7.746043e+02	-5.416633e+02	-4.610989e+02	-6.115857e+01	-5.626753e+01	-1.564630e+02	-1.434022e+02	-1.515726e+02	-1.503110e+02	-1.584807e+02	-1.724248e+02	-5.010608e+02	-9.030536e+01	-7.892402e+01
8.530000e+02	3.118067e+03	-1.124516e+03	-6.257177e+02	-9.059212e+02	-6.648726e+02	-4.841229e+02	-3.830740e+02	-4.914947e+01	-4.463963e+01	-1.297471e+02	-1.173011e+02	-1.252377e+02	-1.221727e+02	-1.301088e+02	-1.446243e+02	-4.225247e+02	-7.711083e+01	-6.467784e+01
8.540000e+02	3.069589e+03	-8.843978e+02	-5.145883e+02	-7.520673e+02	-5.374094e+02	-4.136946e+02	-2.918837e+02	-3.978392e+01	-3.398414e+01	-1.077671e+02	-9.587052e+01	-1.019676e+02	-9.820745e+01	-1.043042e+02	-1.206062e+02	-3.306245e+02	-6.592782e+01	-5.179181e+01
8.550000e+02	3.021142e+03	-6.659703e+02	-4.111834e+02	-5.911544e+02	-4.071511e+02	-3.404722e+02	-1.988488e+02	-3.401949e+01	-2.505882e+01	-9.260992e+01	-8.125503e+01	-8.364947e+01	-8.073843e+01	-8.313257e+01	-1.023920e+02	-2.362846e+02	-5.764337e+01	-4.141154e+01
8.560000e+02	2.978559e+03	-4.973316e+02	-3.287743e+02	-4.437755e+02	-2.899407e+02	-2.752427e+02	-1.160293e+02	-3.244287e+01	-1.851261e+01	-8.566212e+01	-7.491839e+01	-7.173199e+01	-7.145964e+01	-6.827301e+01	-9.156892e+01	-1.512232e+02	-5.296552e+01	-3.451441e+01
8.570000e+02	2.945944e+03	-3.991753e+02	-2.772622e+02	-3.290395e+02	-2.004213e+02	-2.276636e+02	-5.444310e+01	-3.528271e+01	-1.489945e+01	-8.760220e+01	-7.760115e+01	-6.721903e+01	-7.137776e+01	-6.099544e+01	-8.929370e+01	-8.627766e+01	-5.245741e+01	-3.185689e+01
8.580000e+02	2.924718e+03	-3.800664e+02	-2.609325e+02	-2.610451e+02	-1.494291e+02	-2.042890e+02	-2.203573e+01	-4.236627e+01	-1.459572e+01	-9.828103e+01	-8.918456e+01	-7.051056e+01	-8.064736e+01	-6.197320e+01	-9.608671e+01	-4.944610e+01	-5.642612e+01	-3.382878e+01
8.590000e+02	2.913384e+03	-4.338564e+02	-2.772028e+02	-2.457187e+02	-1.415300e+02	-2.069694e+02	-2.190491e+01	-5.302787e+01	-1.764074e+01	-1.165201e+02	-1.084957e+02	-8.113307e+01	-9.834068e+01	-7.097796e+01	-1.114775e+02	-4.412598e+01	-6.469998e+01	-4.025967e+01
8.600000e+02	2.908264e+03	-5.406746e+02	-3.170216e+02	-2.791524e+02	-1.736364e+02	-2.322074e+02	-5.141946e+01	-6.604359e+01	-2.358435e+01	-1.399860e+02	-1.332049e+02	-9.752692e+01	-1.223131e+02	-8.663507e+01	-1.337155e+02	-6.818051e+01	-7.642525e+01	-5.028439e+01
8.610000e+02	2.904971e+03	-6.717834e+02	-3.670627e+02	-3.483323e+02	-2.354955e+02	-2.718559e+02	-1.027152e+02	-7.969048e+01	-3.144654e+01	-1.653343e+02	-1.599943e+02	-1.170905e+02	-1.493527e+02	-1.064490e+02	-1.597993e+02	-1.143252e+02	-9.004077e+01	-6.237915e+01
8.620000e+02	2.900049e+03	-7.970488e+02	-4.131688e+02	-4.343815e+02	-3.122207e+02	-3.151144e+02	-1.646063e+02	-9.198714e+01	-3.985438e+01	-1.887200e+02	-1.850792e+02	-1.365875e+02	-1.757013e+02	-1.272097e+02	-1.859625e+02	-1.719035e+02	-1.035208e+02	-7.461745e+01
8.630000e+02	2.892152e+03	-8.925723e+02	-4.439549e+02	-5.174637e+02	-3.882016e+02	-3.512888e+02	-2.253990e+02	-1.010827e+02	-4.733741e+01	-2.065897e+02	-2.049869e+02	-1.528447e+02	-1.978444e+02	-1.457025e+02	-2.085181e+02	-2.295821e+02	-1.148397e+02	-8.509048e+01
8.640000e+02	2.882392e+03	-9.458034e+02	-4.533427e+02	-5.817410e+02	-4.510718e+02	-3.724398e+02	-2.756926e+02	-1.056713e+02	-5.267765e+01	-2.164924e+02	-2.173298e+02	-1.634991e+02	-2.132972e+02	-1.594669e+02	-2.247566e+02	-2.780906e+02	-1.224842e+02	-9.234560e+01
8.650000e+02	2.873821e+03	-9.564123e+02	-4.411935e+02	-6.186687e+02	-4.943003e+02	-3.750439e+02	-3.102120e+02	-1.052720e+02	-5.517307e+01	-2.175917e+02	-2.212660e+02	-1.674932e+02	-2.210629e+02	-1.672905e+02	-2.335127e+02	-3.120746e+02	-1.257919e+02	-9.567230e+01
8.660000e+02	2.870312e+03	-9.329627e+02	-4.119622e+02	-6.275373e+02	-5.175151e+02	-3.601460e+02	-3.280958e+02	-1.002618e+02	-5.470863e+01	-2.106644e+02	-2.174497e+02	-1.651117e+02	-2.215635e+02	-1.692260e+02	-2.351529e+02	-3.304744e+02	-1.249706e+02	-9.512674e+01
8.670000e+02	2.875268e+03	-8.871780e+02	-3.720932e+02	-6.133169e+02	-5.246372e+02	-3.320737e+02	-3.317009e+02	-9.164932e+01	-5.162034e+01	-1.975916e+02	-2.075012e+02	-1.575633e+02	-2.160842e+02	-1.661468e+02	-2.310060e+02	-3.354516e+02	-1.208085e+02	-9.130627e+01
8.680000e+02	2.890601e+03	-8.284768e+02	-3.273329e+02	-5.829782e+02	-5.208478e+02	-2.963346e+02	-3.245973e+02	-8.069310e+01	-4.643633e+01	-1.805759e+02	-1.932456e+02	-1.463198e+02	-2.060034e+02	-1.590780e+02	-2.225311e+02	-3.304804e+02	-1.142327e+02	-8.499888e+01
8.690000e+02	2.916253e+03	-7.610685e+02	-2.810433e+02	-5.420331e+02	-5.098436e+02	-2.575968e+02	-3.097099e+02	-6.852293e+01	-3.962945e+01	-1.614218e+02	-1.760623e+02	-1.325290e+02	-1.921767e+02	-1.486437e+02	-2.106333e+02	-3.185193e+02	-1.059393e+02	-7.687850e+01
8.700000e+02	2.950306e+03	-6.844703e+02	-2.340301e+02	-4.927753e+02	-4.925714e+02	-2.185264e+02	-2.884029e+02	-5.590627e+01	-3.149232e+01	-1.411628e+02	-1.566115e+02	-1.167496e+02	-1.747491e+02	-1.348874e+02	-1.954371e+02	-3.010426e+02	-9.625293e+01	-6.737423e+01
8.710000e+02	2.989442e+03	-5.966003e+02	-1.856462e+02	-4.347575e+02	-4.678080e+02	-1.798110e+02	-2.607760e+02	-4.322138e+01	-2.216638e+01	-1.201278e+02	-1.350004e+02	-9.907348e+01	-1.534419e+02	-1.175151e+02	-1.765775e+02	-2.782219e+02	-8.524032e+01	-5.673806e+01
8.720000e+02	3.029463e+03	-4.974681e+02	-1.353744e+02	-3.669122e+02	-4.340281e+02	-1.411437e+02	-2.268281e+02	-3.060301e+01	-1.176915e+01	-9.833254e+01	-1.112412e+02	-7.949933e+01	-1.281306e+02	-9.638871e+01	-1.538033e+02	-2.499675e+02	-7.296797e+01	-4.523233e+01
8.730000e+02	3.065679e+03	-3.914266e+02	-8.398326e+01	-2.899728e+02	-3.914328e+02	-1.025463e+02	-1.877535e+02	-1.816127e+01	-5.188220e-01	-7.595331e+01	-8.573136e+01	-5.831145e+01	-9.939992e+01	-7.197975e+01	-1.275561e+02	-2.171473e+02	-5.973736e+01	-3.330747e+01
8.740000e+02	3.093255e+03	-2.869007e+02	-3.370217e+01	-2.078329e+02	-3.430554e+02	-6.532817e+01	-1.466229e+02	-6.160972e+00	1.122684e+01	-5.363900e+01	-5.951336e+01	-3.625172e+01	-6.879975e+01	-4.553774e+01	-9.922842e+01	-1.822781e+02	-4.616816e+01	-2.166220e+01
8.750000e+02	3.107795e+03	-1.938863e+02	1.254029e+01	-1.271436e+02	-2.944167e+02	-3.222487e+01	-1.080628e+02	4.914593e+00	2.303553e+01	-3.253169e+01	-3.420198e+01	-1.441123e+01	-3.868336e+01	-1.889218e+01	-7.098757e+01	-1.493117e+02	-3.309860e+01	-1.115166e+01
8.760000e+02	3.106337e+03	-1.206120e+02	5.226251e+01	-5.541030e+01	-2.519575e+02	-6.685098e+00	-7.706316e+01	1.443020e+01	3.451709e+01	-1.401754e+01	-1.163588e+01	6.068930e+00	-1.170072e+01	6.004530e+00	-4.526148e+01	-1.226118e+02	-2.137085e+01	-2.590775e+00
8.770000e+02	3.088539e+03	-7.104835e+01	8.424282e+01	1.397544e+00	-2.210250e+02	8.323685e+00	-5.745500e+01	2.175289e+01	4.540527e+01	6.503691e-01	6.575570e+00	2.430238e+01	9.839368e+00	2.756656e+01	-2.412328e+01	-1.056113e+02	-1.161817e+01	3.450705e+00
8.780000e+02	3.057489e+03	-4.438120e+01	1.085314e+02	4.052927e+01	-2.043226e+02	1.142888e+01	-5.073177e+01	2.641976e+01	5.553999e+01	1.067831e+01	1.941630e+01	3.979823e+01	2.449395e+01	4.487615e+01	-8.827543e+00	-9.975952e+01	-4.154353e+00	6.768235e+00
8.790000e+02	3.019523e+03	-3.649740e+01	1.256975e+02	6.267652e+01	-2.014260e+02	3.401256e+00	-5.569336e+01	2.825013e+01	6.475085e+01	1.587704e+01	2.661166e+01	5.237751e+01	3.192476e+01	5.769076e+01	3.439337e-01	-1.041961e+02	9.987261e-01	7.513294e+00
8.800000e+02	2.982814e+03	-4.254044e+01	1.358126e+02	7.076992e+01	-2.094403e+02	-1.306043e+01	-6.900587e+01	2.736581e+01	7.271254e+01	1.659485e+01	2.854486e+01	6.194138e+01	3.280825e+01	6.620481e+01	3.917035e+00	-1.162357e+02	3.982417e+00	6.076138e+00
8.810000e+02	2.955195e+03	-5.916675e+01	1.378383e+02	6.808813e+01	-2.243826e+02	-3.416811e+01	-8.638452e+01	2.412789e+01	7.887547e+01	1.350443e+01	2.602183e+01	6.825185e+01	2.849888e+01	7.072885e+01	2.859920e+00	-1.323951e+02	4.953989e+00	2.930567e+00
8.820000e+02	2.942045e+03	-8.541816e+01	1.298662e+02	5.669114e+01	-2.426331e+02	-5.612789e+01	-1.038931e+02	1.903126e+01	8.254570e+01	7.360909e+00	2.000680e+01	7.087523e+01	2.059894e+01	7.146728e+01	-1.805288e+00	-1.494995e+02	4.001398e+00	-1.479970e+00
8.830000e+02	2.945085e+03	-1.219117e+02	1.101864e+02	3.693260e+01	-2.618661e+02	-7.604282e+01	-1.188780e+02	1.260714e+01	8.311140e+01	-1.162355e+00	1.143013e+01	6.934181e+01	1.058818e+01	6.849977e+01	-9.261060e+00	-1.654368e+02	1.158690e+00	-6.767131e+00
8.840000e+02	2.962429e+03	-1.689000e+02	7.870245e+01	8.199584e+00	-2.811835e+02	-9.234166e+01	-1.302688e+02	5.367580e+00	8.032903e+01	-1.150974e+01	1.112955e+00	6.345163e+01	-3.890708e-01	6.194952e+01	-1.895333e+01	-1.793318e+02	-3.496390e+00	-1.253890e+01
8.850000e+02	2.989691e+03	-2.242689e+02	3.800074e+01	-2.959204e+01	-3.005447e+02	-1.046674e+02	-1.382667e+02	-2.202443e+00	7.454004e+01	-2.316862e+01	-1.020732e+01	5.357380e+01	-1.155825e+01	5.222281e+01	-3.047636e+01	-1.911891e+02	-9.722310e+00	-1.830943e+01
8.860000e+02	3.021613e+03	-2.825138e+02	-6.487720e+00	-7.455647e+01	-3.198809e+02	-1.133755e+02	-1.436704e+02	-9.624795e+00	6.671159e+01	-3.554859e+01	-2.180221e+01	4.078775e+01	-2.241424e+01	4.017567e+01	-4.337621e+01	-2.012667e+02	-1.703786e+01	-2.344677e+01
8.870000e+02	3.053666e+03	-3.352542e+02	-4.740861e+01	-1.221962e+02	-3.383636e+02	-1.189151e+02	-1.471891e+02	-1.640890e+01	5.826910e+01	-4.788948e+01	-3.288541e+01	2.678850e+01	-3.256437e+01	2.710948e+01	-5.698296e+01	-2.095184e+02	-2.473120e+01	-2.720820e+01
8.880000e+02	3.083256e+03	-3.731561e+02	-7.722541e+01	-1.659187e+02	-3.541773e+02	-1.213723e+02	-1.490294e+02	-2.205656e+01	5.077338e+01	-5.925057e+01	-4.259624e+01	1.357940e+01	-4.159330e+01	1.458225e+01	-7.035196e+01	-2.153602e+02	-3.195382e+01	-2.886869e+01
8.890000e+02	3.110245e+03	-3.885438e+02	-9.020321e+01	-1.985684e+02	-3.648786e+02	-1.203463e+02	-1.488799e+02	-2.609880e+01	4.554713e+01	-6.859505e+01	-5.005247e+01	3.050976e+00	-4.900418e+01	4.099121e+00	-8.233985e+01	-2.178335e+02	-3.786607e+01	-2.790135e+01
8.900000e+02	3.136595e+03	-3.777156e+02	-8.397822e+01	-2.144200e+02	-3.681457e+02	-1.151775e+02	-1.462186e+02	-2.815757e+01	4.335852e+01	-7.494771e+01	-5.446780e+01	-3.431468e+00	-5.425349e+01	-3.217374e+00	-9.178466e+01	-2.160340e+02	-4.178765e+01	-2.414145e+01
8.910000e+02	3.165100e+03	-3.421001e+02	-6.020429e+01	-2.109117e+02	-3.625549e+02	-1.053882e+02	-1.407317e+02	-2.801564e+01	4.423504e+01	-7.758089e+01	-5.530792e+01	-5.330001e+00	-5.685977e+01	-6.882122e+00	-9.772380e+01	-2.095616e+02	-4.331297e+01	-1.786977e+01
8.920000e+02	3.197513e+03	-2.878346e+02	-2.407064e+01	-1.894898e+02	-3.480334e+02	-9.111481e+01	-1.326099e+02	-2.567508e+01	4.743864e+01	-7.617687e+01	-5.244113e+01	-3.062881e+00	-5.654039e+01	-7.162465e+00	-9.957634e+01	-1.987597e+02	-4.236786e+01	-9.782311e+00
8.930000e+02	3.232840e+03	-2.239247e+02	1.716146e+01	-1.552568e+02	-3.258163e+02	-7.332107e+01	-1.225802e+02	-2.138662e+01	5.160227e+01	-7.092231e+01	-4.623241e+01	2.066913e+00	-5.332426e+01	-5.025296e+00	-9.723622e+01	-1.846434e+02	-3.920063e+01	-8.565994e-01
8.940000e+02	3.266715e+03	-1.596465e+02	5.615363e+01	-1.155257e+02	-2.979771e+02	-5.368552e+01	-1.116818e+02	-1.563755e+01	5.500814e+01	-6.250738e+01	-3.754014e+01	8.138692e+00	-4.760179e+01	-1.923350e+00	-9.105936e+01	-1.685821e+02	-3.431374e+01	7.840013e+00
8.950000e+02	3.292430e+03	-1.020921e+02	8.740113e+01	-7.775896e+01	-2.667835e+02	-3.420331e+01	-1.009235e+02	-9.094461e+00	5.596600e+01	-5.202675e+01	-2.760268e+01	1.303415e+01	-4.009992e+01	5.365063e-01	-8.176460e+01	-1.519157e+02	-2.835320e+01	1.534081e+01
8.960000e+02	3.303337e+03	-5.466268e+01	1.084716e+02	-4.757599e+01	-2.341689e+02	-1.666708e+01	-9.100159e+01	-2.508707e+00	5.321736e+01	-4.080447e+01	-1.783880e+01	1.492211e+01	-3.179503e+01	9.654549e-01	-7.029306e+01	-1.356868e+02	-2.198218e+01	2.091998e+01
8.970000e+02	3.295565e+03	-1.691717e+01	1.202109e+02	-2.747123e+01	-2.015026e+02	-2.235669e+00	-8.219451e+01	3.396755e+00	4.626270e+01	-3.018419e+01	-9.613412e+00	1.268233e+01	-2.378871e+01	-1.493428e+00	-5.767254e+01	-1.205747e+02	-1.577058e+01	2.415970e+01
8.980000e+02	3.269662e+03	1.434335e+01	1.259155e+02	-1.661231e+01	-1.696612e+02	8.754348e+00	-7.443903e+01	8.035149e+00	3.550811e+01	-2.133039e+01	-4.024830e+00	6.143224e+00	-1.716644e+01	-6.998903e+00	-4.491578e+01	-1.069872e+02	-1.012710e+01	2.494952e+01
8.990000e+02	3.230257e+03	4.332285e+01	1.298374e+02	-1.167862e+01	-1.392497e+02	1.670060e+01	-6.748777e+01	1.103781e+01	2.217314e+01	-1.507408e+01	-1.751550e+00	-3.938039e+00	-1.284772e+01	-1.503480e+01	-3.295169e+01	-9.518370e+01	-5.283912e+00	2.344317e+01
9.000000e+02	3.183870e+03	7.354931e+01	1.355995e+02	-8.328802e+00	-1.107772e+02	2.246129e+01	-6.102454e+01	1.230022e+01	7.982292e+00	-1.181600e+01	-2.968517e+00	-1.613317e+01	-1.143062e+01	-2.459596e+01	-2.256517e+01	-8.530825e+01	-1.321042e+00	2.000321e+01
9.010000e+02	3.135925e+03	1.068480e+02	1.450765e+02	-2.703948e+00	-8.465867e+01	2.704942e+01	-5.466841e+01	1.199226e+01	-5.258178e+00	-1.148369e+01	-7.325129e+00	-2.873337e+01	-1.304472e+01	-3.445374e+01	-1.431729e+01	-7.729924e+01	1.799150e+00	1.515526e+01
9.020000e+02	3.088473e+03	1.431585e+02	1.580417e+02	7.544258e+00	-6.105910e+01	3.142014e+01	-4.789685e+01	1.053642e+01	-1.605929e+01	-1.353828e+01	-1.397851e+01	-4.013326e+01	-1.724884e+01	-4.340446e+01	-8.439276e+00	-7.074927e+01	4.216138e+00	9.557332e+00
9.030000e+02	3.039716e+03	1.809775e+02	1.725423e+02	2.292761e+01	-3.971895e+01	3.638277e+01	-3.999475e+01	8.553541e+00	-2.350900e+01	-1.703774e+01	-2.168894e+01	-4.909961e+01	-2.302650e+01	-5.043812e+01	-4.729784e+00	-6.484978e+01	6.183088e+00	3.972767e+00
9.040000e+02	2.985548e+03	2.180008e+02	1.857030e+02	4.239869e+01	-1.993895e+01	4.257586e+01	-3.013861e+01	6.771368e+00	-2.734465e+01	-2.077238e+01	-2.899034e+01	-5.488785e+01	-2.892288e+01	-5.482139e+01	-2.514474e+00	-5.852787e+01	8.087204e+00	-7.736535e-01
9.050000e+02	2.922344e+03	2.516170e+02	1.945913e+02	6.393319e+01	-8.229105e-01	5.041286e+01	-1.764800e+01	5.894921e+00	-2.786328e+01	-2.347834e+01	-3.443335e+01	-5.723612e+01	-3.332589e+01	-5.612970e+01	-7.270002e-01	-5.077865e+01	1.044029e+01	-3.874140e+00
9.060000e+02	2.849693e+03	2.791759e+02	1.968899e+02	8.512241e+01	1.827922e+01	5.995838e+01	-2.321035e+00	6.453084e+00	-2.573884e+01	-2.410289e+01	-3.686312e+01	-5.629455e+01	-3.483408e+01	-5.426653e+01	1.866789e+00	-4.107238e+01	1.380545e+01	-4.653093e+00
9.070000e+02	2.771828e+03	2.981974e+02	1.913003e+02	1.036310e+02	3.733125e+01	7.078792e+01	1.531141e+01	8.655988e+00	-2.181857e+01	-2.205834e+01	-3.566146e+01	-5.253279e+01	-3.260554e+01	-4.947784e+01	6.341762e+00	-2.964409e+01	1.865466e+01	-2.699817e+00
9.080000e+02	2.697121e+03	3.067328e+02	1.777212e+02	1.175347e+02	5.542148e+01	8.194593e+01	3.397194e+01	1.230934e+01	-1.694735e+01	-1.738225e+01	-3.087487e+01	-4.663897e+01	-2.657304e+01	-4.233804e+01	1.328102e+01	-1.750200e+01	2.519199e+01	2.018568e+00
9.090000e+02	2.635828e+03	3.039008e+02	1.572511e+02	1.256070e+02	7.097499e+01	9.209461e+01	5.192122e+01	1.682447e+01	-1.184135e+01	-1.073982e+01	-2.318004e+01	-3.940582e+01	-1.744952e+01	-3.367610e+01	2.255686e+01	-6.112339e+00	3.320756e+01	9.106094e+00
9.100000e+02	2.596881e+03	2.903653e+02	1.319999e+02	1.275522e+02	8.232027e+01	9.984467e+01	6.745132e+01	2.133556e+01	-7.016071e+00	-3.254851e+00	-1.369350e+01	-3.160679e+01	-6.521535e+00	-2.443550e+01	3.331389e+01	3.125760e+00	4.202949e+01	1.777760e+01
9.110000e+02	2.584852e+03	2.683906e+02	1.046633e+02	1.240800e+02	8.836746e+01	1.041438e+02	7.938499e+01	2.489868e+01	-2.768121e+00	3.782298e+00	-3.687899e+00	-2.388493e+01	4.697459e+00	-1.550013e+01	4.417147e+01	9.392455e+00	5.061124e+01	2.698998e+01
9.120000e+02	2.598029e+03	2.412511e+02	7.787413e+01	1.166897e+02	8.907553e+01	1.045448e+02	8.736231e+01	2.671674e+01	7.923033e-01	9.236656e+00	5.691820e+00	-1.668832e+01	1.483610e+01	-7.544483e+00	5.357957e+01	1.271945e+01	5.774090e+01	3.563366e+01
9.130000e+02	2.628226e+03	2.121108e+02	5.347750e+01	1.071299e+02	8.547277e+01	1.012245e+02	9.179025e+01	2.632307e+01	3.668959e+00	1.237910e+01	1.362521e+01	-1.027566e+01	2.293869e+01	-9.625179e-01	6.020469e+01	1.390077e+01	6.231049e+01	4.273059e+01
9.140000e+02	2.662383e+03	1.828283e+02	3.199142e+01	9.668362e+01	7.920998e+01	9.474955e+01	9.348633e+01	2.366941e+01	5.888163e+00	1.299388e+01	1.967711e+01	-4.788108e+00	2.856789e+01	4.102431e+00	6.321605e+01	1.408504e+01	6.355891e+01	4.758246e+01
9.150000e+02	2.685545e+03	1.532606e+02	1.251162e+01	8.556858e+01	7.185549e+01	8.571597e+01	9.318763e+01	1.909704e+01	7.417763e+00	1.132619e+01	2.372680e+01	-3.539107e-01	3.172812e+01	7.647260e+00	6.238901e+01	1.423554e+01	6.121397e+01	4.983273e+01
9.160000e+02	2.684408e+03	1.214478e+02	-6.833715e+00	7.275219e+01	6.426243e+01	7.444943e+01	9.115116e+01	1.321020e+01	8.125678e+00	7.909990e+00	2.581842e+01	2.824573e+00	3.266716e+01	9.673257e+00	5.802144e+01	1.469843e+01	5.550017e+01	4.944002e+01
9.170000e+02	2.650460e+03	8.463429e+01	-2.801634e+01	5.632312e+01	5.628885e+01	6.091577e+01	8.702001e+01	6.703147e+00	7.797240e+00	3.353827e+00	2.601134e+01	4.446980e+00	3.165520e+01	1.009089e+01	5.073284e+01	1.506079e+01	4.703161e+01	4.659334e+01
9.180000e+02	2.581839e+03	4.066641e+01	-5.217516e+01	3.430953e+01	4.696322e+01	4.487386e+01	7.999993e+01	2.039397e-01	6.212596e+00	-1.831840e+00	2.430191e+01	4.175856e+00	2.884062e+01	8.714713e+00	4.125229e+01	1.433949e+01	3.664746e+01	4.161580e+01
9.190000e+02	2.483455e+03	-1.088631e+01	-7.902431e+01	5.609639e+00	3.496936e+01	2.617555e+01	6.924800e+01	-5.816468e+00	3.263597e+00	-7.310432e+00	2.065054e+01	1.768678e+00	2.424045e+01	5.358847e+00	3.028454e+01	1.139066e+01	2.525602e+01	3.489746e+01
9.200000e+02	2.365441e+03	-6.838817e+01	-1.068679e+02	-2.937774e+01	1.919361e+01	5.044873e+00	5.428626e+01	-1.105432e+01	-9.297931e-01	-1.289006e+01	1.509472e+01	-2.766457e+00	1.785722e+01	-3.605223e-03	1.848617e+01	5.341173e+00	1.373058e+01	2.687297e+01
9.210000e+02	2.240525e+03	-1.286662e+02	-1.332075e+02	-6.871253e+01	-9.036987e-01	-1.781095e+01	3.525972e+01	-1.532307e+01	-5.952368e+00	-1.842684e+01	7.884806e+00	-9.057010e+00	9.852353e+00	-7.089028e+00	6.517892e+00	-4.140354e+00	2.862522e+00	1.803138e+01
9.220000e+02	2.121164e+03	-1.880613e+02	-1.556508e+02	-1.094778e+02	-2.519005e+01	-4.130714e+01	1.295115e+01	-1.848622e+01	-1.111552e+01	-2.372187e+01	-4.343853e-01	-1.635197e+01	6.800168e-01	-1.523708e+01	-4.900042e+00	-1.681023e+01	-6.654696e+00	8.928410e+00
9.230000e+02	2.017236e+03	-2.434208e+02	-1.726960e+02	-1.486710e+02	-5.296453e+01	-6.423206e+01	-1.140632e+01	-2.041499e+01	-1.557945e+01	-2.846669e+01	-9.048997e+00	-2.363187e+01	-8.895173e+00	-2.347753e+01	-1.499673e+01	-3.199892e+01	-1.424608e+01	1.724225e-01
9.240000e+02	1.934794e+03	-2.925604e+02	-1.840579e+02	-1.839914e+02	-8.310211e+01	-8.549975e+01	-3.638697e+01	-2.099246e+01	-1.854859e+01	-3.226357e+01	-1.701395e+01	-2.982032e+01	-1.791861e+01	-3.072445e+01	-2.304901e+01	-4.880581e+01	-1.950142e+01	-7.627970e+00
9.250000e+02	1.875999e+03	-3.340990e+02	-1.904575e+02	-2.141688e+02	-1.141137e+02	-1.042810e+02	-6.056580e+01	-2.015903e+01	-1.948089e+01	-3.471320e+01	-2.346129e+01	-3.403557e+01	-2.546620e+01	-3.603996e+01	-2.854290e+01	-6.621637e+01	-2.224258e+01	-1.394665e+01
9.260000e+02	1.839976e+03	-3.669754e+02	-1.930781e+02	-2.387533e+02	-1.441277e+02	-1.199843e+02	-8.259416e+01	-1.797522e+01	-1.824241e+01	-3.553842e+01	-2.781224e+01	-3.580601e+01	-3.088864e+01	-3.888190e+01	-3.133733e+01	-8.311386e+01	-2.258576e+01	-1.843105e+01
9.270000e+02	1.824175e+03	-3.901389e+02	-1.930360e+02	-2.575975e+02	-1.709243e+02	-1.321657e+02	-1.012130e+02	-1.467346e+01	-1.515725e+01	-3.470422e+01	-2.992900e+01	-3.518830e+01	-3.399829e+01	-3.925711e+01	-3.176571e+01	-9.826576e+01	-2.096643e+01	-2.097600e+01
9.280000e+02	1.825749e+03	-4.027306e+02	-1.911363e+02	-2.704189e+02	-1.921785e+02	-1.404885e+02	-1.153134e+02	-1.067737e+01	-1.093982e+01	-3.249596e+01	-3.016314e+01	-3.275860e+01	-3.513981e+01	-3.773480e+01	-3.063039e+01	-1.104064e+02	-1.810300e+01	-2.175848e+01
9.290000e+02	1.842540e+03	-4.046744e+02	-1.879580e+02	-2.767377e+02	-2.059493e+02	-1.448018e+02	-1.241113e+02	-6.577423e+00	-6.534236e+00	-2.952386e+01	-2.928347e+01	-2.948078e+01	-3.511911e+01	-3.531596e+01	-2.907444e+01	-1.184762e+02	-1.489221e+01	-2.121880e+01
9.300000e+02	1.873415e+03	-3.972354e+02	-1.840775e+02	-2.761998e+02	-2.112701e+02	-1.452918e+02	-1.273917e+02	-3.059922e+00	-2.907918e+00	-2.663273e+01	-2.829034e+01	-2.648079e+01	-3.499964e+01	-3.318963e+01	-2.834531e+01	-1.219485e+02	-1.224811e+01	-1.998230e+01
9.310000e+02	1.917922e+03	-3.830544e+02	-1.801716e+02	-2.690122e+02	-2.085579e+02	-1.425716e+02	-1.256755e+02	-7.947878e-01	-8.498522e-01	-2.471759e+01	-2.814895e+01	-2.477271e+01	-3.580792e+01	-3.243123e+01	-2.949450e+01	-1.210730e+02	-1.091506e+01	-1.872850e+01
9.320000e+02	1.975471e+03	-3.654863e+02	-1.768648e+02	-2.561372e+02	-1.995940e+02	-1.375832e+02	-1.201610e+02	-2.989282e-01	-8.148418e-01	-2.448074e+01	-2.950256e+01	-2.499671e+01	-3.822057e+01	-3.371429e+01	-3.308634e+01	-1.168643e+02	-1.130121e+01	-1.803266e+01
9.330000e+02	2.044448e+03	-3.475413e+02	-1.744228e+02	-2.390733e+02	-1.870223e+02	-1.313040e+02	-1.124017e+02	-1.808018e+00	-2.842302e+00	-2.620443e+01	-3.245140e+01	-2.723880e+01	-4.232654e+01	-3.711351e+01	-3.900834e+01	-1.107887e+02	-1.338574e+01	-1.822207e+01
9.340000e+02	2.121723e+03	-3.310347e+02	-1.725505e+02	-2.193568e+02	-1.735724e+02	-1.243965e+02	-1.038418e+02	-5.200561e+00	-6.565701e+00	-2.963170e+01	-3.648459e+01	-3.099698e+01	-4.755506e+01	-4.206703e+01	-4.646643e+01	-1.042750e+02	-1.674166e+01	-1.929671e+01
9.350000e+02	2.202813e+03	-3.164593e+02	-1.705211e+02	-1.981398e+02	-1.613650e+02	-1.170121e+02	-9.543383e+01	-1.001296e+01	-1.131402e+01	-3.402585e+01	-4.061663e+01	-3.532710e+01	-5.282056e+01	-4.753064e+01	-5.419991e+01	-9.828580e+01	-2.068244e+01	-2.095051e+01
9.360000e+02	2.282659e+03	-3.036704e+02	-1.676548e+02	-1.761635e+02	-1.516089e+02	-1.088986e+02	-8.752837e+01	-1.555679e+01	-1.628685e+01	-3.841440e+01	-4.370858e+01	-3.914469e+01	-5.686308e+01	-5.229882e+01	-6.087016e+01	-9.316168e+01	-2.449214e+01	-2.269634e+01
9.370000e+02	2.356651e+03	-2.929780e+02	-1.639264e+02	-1.541885e+02	-1.447769e+02	-9.978698e+01	-8.008569e+01	-2.110795e+01	-2.076262e+01	-4.194142e+01	-4.487523e+01	-4.159632e+01	-5.868385e+01	-5.540462e+01	-6.549924e+01	-8.880256e+01	-2.765908e+01	-2.405589e+01
9.380000e+02	2.421409e+03	-2.860109e+02	-1.603761e+02	-1.336323e+02	-1.410865e+02	-8.986450e+01	-7.308139e+01	-2.610201e+01	-2.428447e+01	-4.419427e+01	-4.383240e+01	-4.237698e+01	-5.792574e+01	-5.647005e+01	-6.779960e+01	-8.506903e+01	-3.002440e+01	-2.474643e+01
9.390000e+02	2.474996e+03	-2.858482e+02	-1.590821e+02	-1.170150e+02	-1.409730e+02	-8.007971e+01	-6.688532e+01	-3.026207e+01	-2.676961e+01	-4.537076e+01	-4.105136e+01	-4.187855e+01	-5.505665e+01	-5.588364e+01	-6.826886e+01	-8.217969e+01	-3.178973e+01	-2.479367e+01
9.400000e+02	2.516560e+03	-2.963150e+02	-1.626722e+02	-1.079021e+02	-1.452781e+02	-7.210610e+01	-6.241890e+01	-3.361245e+01	-2.850810e+01	-4.621536e+01	-3.765878e+01	-4.111127e+01	-5.128088e+01	-5.473322e+01	-6.801265e+01	-8.089776e+01	-3.338830e+01	-2.452868e+01
9.410000e+02	2.545710e+03	-3.207340e+02	-1.735527e+02	-1.102773e+02	-1.550602e+02	-6.796326e+01	-6.101609e+01	-3.638165e+01	-3.005067e+01	-4.774929e+01	-3.511768e+01	-4.141856e+01	-4.820249e+01	-5.450327e+01	-6.836289e+01	-8.241717e+01	-3.528089e+01	-2.447254e+01
9.420000e+02	2.562018e+03	-3.606200e+02	-1.931232e+02	-1.275360e+02	-1.711281e+02	-6.944945e+01	-6.405046e+01	-3.884606e+01	-3.201848e+01	-5.090272e+01	-3.480351e+01	-4.407541e+01	-4.735331e+01	-5.662514e+01	-7.043060e+01	-8.800073e+01	-3.776220e+01	-2.515490e+01
9.430000e+02	2.564944e+03	-4.147541e+02	-2.212069e+02	-1.614123e+02	-1.935170e+02	-7.760073e+01	-7.247584e+01	-4.118709e+01	-3.489057e+01	-5.618965e+01	-3.761659e+01	-4.989341e+01	-4.974069e+01	-6.201747e+01	-7.474330e+01	-9.851810e+01	-4.084508e+01	-2.693376e+01
9.440000e+02	2.554201e+03	-4.788844e+02	-2.558260e+02	-2.111490e+02	-2.211248e+02	-9.234660e+01	-8.643881e+01	-4.341982e+01	-3.882931e+01	-6.353622e+01	-4.374363e+01	-5.894603e+01	-5.555396e+01	-7.075632e+01	-8.107045e+01	-1.140512e+02	-4.424419e+01	-2.987601e+01
9.450000e+02	2.530423e+03	-5.461126e+02	-2.933656e+02	-2.731302e+02	-2.516359e+02	-1.124331e+02	-1.050771e+02	-4.540996e+01	-4.359189e+01	-7.230220e+01	-5.261764e+01	-7.048449e+01	-6.410585e+01	-8.197266e+01	-8.846606e+01	-1.336940e+02	-4.743661e+01	-3.372948e+01
9.460000e+02	2.495877e+03	-6.079200e+02	-3.291186e+02	-3.411061e+02	-2.817603e+02	-1.355982e+02	-1.265579e+02	-4.695343e+01	-4.855132e+01	-8.146058e+01	-6.306043e+01	-8.305889e+01	-7.400652e+01	-9.400491e+01	-9.548963e+01	-1.556060e+02	-4.975827e+01	-3.798292e+01
9.470000e+02	2.454995e+03	-6.557142e+02	-3.581621e+02	-4.070508e+02	-3.077399e+02	-1.589461e+02	-1.483571e+02	-4.786935e+01	-5.282259e+01	-8.985520e+01	-7.354920e+01	-9.480887e+01	-8.350244e+01	-1.047620e+02	-1.005298e+02	-1.773190e+02	-5.050693e+01	-4.198531e+01
9.480000e+02	2.414517e+03	-6.826768e+02	-3.764307e+02	-4.625861e+02	-3.260426e+02	-1.794639e+02	-1.677400e+02	-4.806363e+01	-5.546431e+01	-9.645316e+01	-8.253529e+01	-1.038543e+02	-9.088016e+01	-1.121990e+02	-1.021511e+02	-1.962386e+02	-4.904808e+01	-4.508760e+01
9.490000e+02	2.383027e+03	-6.855129e+02	-3.817399e+02	-5.007391e+02	-3.341376e+02	-1.946128e+02	-1.823555e+02	-4.754627e+01	-5.570836e+01	-1.005367e+02	-8.874954e+01	-1.086992e+02	-9.483591e+01	-1.147853e+02	-9.939944e+01	-2.102398e+02	-4.493421e+01	-4.677423e+01
9.500000e+02	2.369760e+03	-6.655475e+02	-3.744242e+02	-5.176101e+02	-3.311913e+02	-2.028858e+02	-1.908068e+02	-4.641332e+01	-5.316135e+01	-1.018118e+02	-9.144089e+01	-1.085602e+02	-9.473512e+01	-1.118542e+02	-9.201989e+01	-2.182058e+02	-3.803749e+01	-4.676059e+01
9.510000e+02	2.382702e+03	-6.286275e+02	-3.572924e+02	-5.134170e+02	-3.184660e+02	-2.041732e+02	-1.930207e+02	-4.481635e+01	-4.792420e+01	-1.004330e+02	-9.050506e+01	-1.035412e+02	-9.071648e+01	-1.037522e+02	-8.054860e+01	-2.203367e+02	-2.866414e+01	-4.503972e+01
9.520000e+02	2.426391e+03	-5.836009e+02	-3.348058e+02	-4.924624e+02	-2.991935e+02	-1.997766e+02	-1.902563e+02	-4.293643e+01	-4.059242e+01	-9.694583e+01	-8.647387e+01	-9.460197e+01	-8.362657e+01	-9.175420e+01	-6.624937e+01	-2.180861e+02	-1.759274e+01	-4.186802e+01
9.530000e+02	2.500116e+03	-5.396874e+02	-3.116910e+02	-4.618867e+02	-2.778134e+02	-1.919924e+02	-1.846924e+02	-4.096424e+01	-3.213062e+01	-9.215456e+01	-8.036114e+01	-8.332096e+01	-7.480296e+01	-7.776225e+01	-5.088463e+01	-2.136852e+02	-5.982513e+00	-3.769066e+01
9.540000e+02	2.597336e+03	-5.036025e+02	-2.914719e+02	-4.295322e+02	-2.587000e+02	-1.833537e+02	-1.786904e+02	-3.907821e+01	-2.365379e+01	-8.693394e+01	-7.340102e+01	-7.150939e+01	-6.575807e+01	-6.386588e+01	-3.635244e+01	-2.093759e+02	4.858853e+00	-3.302512e+01
9.550000e+02	2.706796e+03	-4.775228e+02	-2.754812e+02	-4.016353e+02	-2.447689e+02	-1.757819e+02	-1.739849e+02	-3.741556e+01	-1.618192e+01	-8.202749e+01	-6.675510e+01	-6.079359e+01	-5.784622e+01	-5.188415e+01	-2.427229e+01	-2.066161e+02	1.379291e+01	-2.833937e+01
9.560000e+02	2.815197e+03	-4.587153e+02	-2.627308e+02	-3.811830e+02	-2.364909e+02	-1.699696e+02	-1.711149e+02	-3.604282e+01	-1.044606e+01	-7.789484e+01	-6.128280e+01	-5.229771e+01	-5.200681e+01	-4.302119e+01	-1.563841e+01	-2.055709e+02	2.014831e+01	-2.396748e+01
9.570000e+02	2.910613e+03	-4.409817e+02	-2.506572e+02	-3.675173e+02	-2.317455e+02	-1.652405e+02	-1.693254e+02	-3.494122e+01	-6.803167e+00	-7.466270e+01	-5.744854e+01	-4.652422e+01	-4.865593e+01	-3.773113e+01	-1.065062e+01	-2.051091e+02	2.388880e+01	-2.009184e+01
9.580000e+02	2.985460e+03	-4.173159e+02	-2.363931e+02	-3.572591e+02	-2.266272e+02	-1.599350e+02	-1.669807e+02	-3.402052e+01	-5.271951e+00	-7.219776e+01	-5.538169e+01	-4.344874e+01	-4.774599e+01	-3.581260e+01	-8.775703e+00	-2.033224e+02	2.558884e+01	-1.679065e+01
9.590000e+02	3.038000e+03	-3.827020e+02	-2.180266e+02	-3.460848e+02	-2.169186e+02	-1.521512e+02	-1.623102e+02	-3.316248e+01	-5.652385e+00	-7.026754e+01	-5.503815e+01	-4.275700e+01	-4.894946e+01	-3.666788e+01	-9.007470e+00	-1.983588e+02	2.623006e+01	-1.411820e+01
9.600000e+02	3.071884e+03	-3.360188e+02	-1.953798e+02	-3.305942e+02	-1.996703e+02	-1.405418e+02	-1.541795e+02	-3.228087e+01	-7.663939e+00	-6.871732e+01	-5.637081e+01	-4.410000e+01	-5.187781e+01	-3.960656e+01	-1.022509e+01	-1.892346e+02	2.689585e+01	-1.217091e+01
9.610000e+02	3.093950e+03	-2.804737e+02	-1.700941e+02	-3.095639e+02	-1.742973e+02	-1.248751e+02	-1.425852e+02	-3.137736e+01	-1.104353e+01	-6.758912e+01	-5.942214e+01	-4.725495e+01	-5.624248e+01	-4.407480e+01	-1.152598e+01	-1.763012e+02	2.846511e+01	-1.110326e+01
9.620000e+02	3.111036e+03	-2.226116e+02	-1.451046e+02	-2.842263e+02	-1.428308e+02	-1.061976e+02	-1.287051e+02	-3.057470e+01	-1.557705e+01	-6.714133e+01	-6.430120e+01	-5.214343e+01	-6.190146e+01	-4.974314e+01	-1.243883e+01	-1.612003e+02	3.138691e+01	-1.108686e+01
9.630000e+02	3.126862e+03	-1.704100e+02	-1.237740e+02	-2.576452e+02	-1.093085e+02	-8.659413e+01	-1.145224e+02	-3.011412e+01	-2.107635e+01	-6.777367e+01	-7.106965e+01	-5.873573e+01	-6.879252e+01	-5.645798e+01	-1.297905e+01	-1.463444e+02	3.557704e+01	-1.223617e+01
9.640000e+02	3.139999e+03	-1.311334e+02	-1.089826e+02	-2.335681e+02	-7.859264e+01	-6.866224e+01	-1.021901e+02	-3.031091e+01	-2.733460e+01	-6.989396e+01	-7.960315e+01	-6.691758e+01	-7.680191e+01	-6.411568e+01	-1.356195e+01	-1.341386e+02	4.044118e+01	-1.453922e+01
9.650000e+02	3.143660e+03	-1.095092e+02	-1.023902e+02	-2.152145e+02	-5.504453e+01	-5.486042e+01	-9.336703e+01	-3.146796e+01	-3.409079e+01	-7.376973e+01	-8.949636e+01	-7.639261e+01	-8.563616e+01	-7.253173e+01	-1.481741e+01	-1.262248e+02	4.501028e+01	-1.782436e+01
9.660000e+02	3.127487e+03	-1.065688e+02	-1.039836e+02	-2.043522e+02	-4.144491e+01	-4.688055e+01	-8.872668e+01	-3.375869e+01	-4.101575e+01	-7.939639e+01	-1.000489e+02	-8.665360e+01	-9.475231e+01	-8.135633e+01	-1.735681e+01	-1.229961e+02	4.816536e+01	-2.177317e+01
9.670000e+02	3.080923e+03	-1.193166e+02	-1.119682e+02	-2.008281e+02	-3.839696e+01	-4.516927e+01	-8.775789e+01	-3.710801e+01	-4.771627e+01	-8.640382e+01	-1.103309e+02	-9.701238e+01	-1.033726e+02	-9.005347e+01	-2.154186e+01	-1.235037e+02	4.891711e+01	-2.596781e+01
9.680000e+02	2.997086e+03	-1.412774e+02	-1.230416e+02	-2.025805e+02	-4.427769e+01	-4.870784e+01	-8.887981e+01	-4.111631e+01	-5.375044e+01	-9.402431e+01	-1.193011e+02	-1.066589e+02	-1.105801e+02	-9.793726e+01	-2.730653e+01	-1.257451e+02	4.668536e+01	-2.995125e+01
9.690000e+02	2.875844e+03	-1.638635e+02	-1.330478e+02	-2.060843e+02	-5.567951e+01	-5.513587e+01	-8.982281e+01	-4.507248e+01	-5.865490e+01	-1.011478e+02	-1.259488e+02	-1.147308e+02	-1.154706e+02	-1.042521e+02	-3.408307e+01	-1.272137e+02	4.150435e+01	-3.328219e+01
9.700000e+02	2.724963e+03	-1.783243e+02	-1.379086e+02	-2.071487e+02	-6.821194e+01	-6.124070e+01	-8.817946e+01	-4.807696e+01	-6.199239e+01	-1.064793e+02	-1.294346e+02	-1.203954e+02	-1.173241e+02	-1.082846e+02	-4.086819e+01	-1.255386e+02	3.408151e+01	-3.557736e+01
9.710000e+02	2.558881e+03	-1.778111e+02	-1.346004e+02	-2.019207e+02	-7.748609e+01	-6.372198e+01	-8.199931e+01	-4.925109e+01	-6.342325e+01	-1.087793e+02	-1.292135e+02	-1.229522e+02	-1.157522e+02	-1.094907e+02	-4.642837e+01	-1.190485e+02	2.567146e+01	-3.654351e+01
9.720000e+02	2.395541e+03	-1.589543e+02	-1.218647e+02	-1.878592e+02	-8.006594e+01	-6.001936e+01	-7.028194e+01	-4.796521e+01	-6.278772e+01	-1.071252e+02	-1.251163e+02	-1.219485e+02	-1.107782e+02	-1.076104e+02	-4.959427e+01	-1.071287e+02	1.778577e+01	-3.600261e+01
9.730000e+02	2.252429e+03	-1.224368e+02	-1.003980e+02	-1.643845e+02	-7.415755e+01	-4.893254e+01	-5.322900e+01	-4.400209e+01	-6.016759e+01	-1.011099e+02	-1.173670e+02	-1.172762e+02	-1.028221e+02	-1.027314e+02	-4.955619e+01	-9.029674e+01	1.181784e+01	-3.391079e+01
9.740000e+02	2.143193e+03	-7.239748e+01	-7.246135e+01	-1.329638e+02	-5.985841e+01	-3.082144e+01	-3.216710e+01	-3.759772e+01	-5.589112e+01	-9.091095e+01	-1.065238e+02	-1.092050e+02	-9.258893e+01	-9.527040e+01	-4.606829e+01	-6.999102e+01	8.693740e+00	-3.036771e+01
9.750000e+02	2.075843e+03	-1.497024e+01	-4.110013e+01	-9.658416e+01	-3.891899e+01	-7.341775e+00	-9.155591e+00	-2.935539e+01	-5.046332e+01	-7.721985e+01	-9.335796e+01	-9.832831e+01	-8.089849e+01	-8.586912e+01	-3.950342e+01	-4.814483e+01	8.650211e+00	-2.561403e+01
9.760000e+02	2.052806e+03	4.339831e+01	-9.325135e+00	-5.882401e+01	-1.413612e+01	1.913248e+01	1.358702e+01	-2.008343e+01	-4.443701e+01	-6.108060e+01	-7.871445e+01	-8.543451e+01	-6.851868e+01	-7.523906e+01	-3.075673e+01	-2.668600e+01	1.119592e+01	-2.001768e+01
9.770000e+02	2.072348e+03	9.719003e+01	2.040999e+01	-2.291405e+01	1.137591e+01	4.612870e+01	3.422332e+01	-1.063111e+01	-3.827279e+01	-4.371527e+01	-6.340531e+01	-7.135706e+01	-5.606677e+01	-6.401883e+01	-2.104649e+01	-7.130815e+00	1.525407e+01	-1.405144e+01
9.780000e+02	2.130384e+03	1.422723e+02	4.629609e+01	8.829096e+00	3.477847e+01	7.148992e+01	5.160122e+01	-1.780289e+00	-3.224725e+01	-2.639844e+01	-4.817070e+01	-5.686528e+01	-4.401000e+01	-5.270485e+01	-1.168306e+01	9.594843e+00	1.943530e+01	-8.261309e+00
9.790000e+02	2.221761e+03	1.757002e+02	6.693940e+01	3.502751e+01	5.381898e+01	9.348674e+01	6.523174e+01	5.793533e+00	-2.645059e+01	-1.039039e+01	-3.370128e+01	-4.263417e+01	-3.274886e+01	-4.168198e+01	-3.866231e+00	2.307343e+01	2.236372e+01	-3.219910e+00
9.800000e+02	2.340594e+03	1.953378e+02	8.110631e+01	5.485884e+01	6.688454e+01	1.107166e+02	7.501295e+01	1.152070e+01	-2.087448e+01	3.110066e+00	-2.067920e+01	-2.928459e+01	-2.272394e+01	-3.132949e+01	1.458972e+00	3.314118e+01	2.297690e+01	5.415285e-01
9.810000e+02	2.479880e+03	1.997870e+02	8.771536e+01	6.761571e+01	7.295361e+01	1.219933e+02	8.089902e+01	1.494496e+01	-1.554801e+01	1.304795e+01	-9.782231e+00	-1.744438e+01	-1.447409e+01	-2.213631e+01	3.688324e+00	3.963205e+01	2.073561e+01	2.621330e+00
9.820000e+02	2.631117e+03	1.888029e+02	8.615731e+01	7.255631e+01	7.160957e+01	1.264057e+02	8.272864e+01	1.577082e+01	-1.065586e+01	1.865571e+01	-1.616574e+00	-7.770279e+00	-8.597294e+00	-1.475098e+01	2.600358e+00	4.228267e+01	1.570423e+01	2.838524e+00
9.830000e+02	2.784711e+03	1.639456e+02	7.677699e+01	6.917662e+01	6.316725e+01	1.235836e+02	8.031968e+01	1.394472e+01	-6.580882e+00	1.962901e+01	3.410888e+00	-8.959577e-01	-5.615769e+00	-9.922489e+00	-1.636161e+00	4.085918e+01	8.491037e+00	1.294778e+00
9.840000e+02	2.931478e+03	1.289588e+02	6.120351e+01	5.773904e+01	4.881382e+01	1.140409e+02	7.376791e+01	9.728881e+00	-3.847632e+00	1.625821e+01	5.226055e+00	2.682182e+00	-5.798768e+00	-8.342397e+00	-8.493510e+00	3.542797e+01	6.817707e-02	-1.628326e+00
9.850000e+02	3.064849e+03	8.944741e+01	4.226046e+01	3.970732e+01	3.058872e+01	9.937844e+01	6.375807e+01	3.714394e+00	-2.987444e+00	9.431206e+00	4.153743e+00	2.729607e+00	-9.025038e+00	-1.044881e+01	-1.716692e+01	2.659852e+01	-8.481817e+00	-5.356189e+00
9.860000e+02	3.182791e+03	5.178613e+01	2.339464e+01	1.777505e+01	1.108553e+01	8.216795e+01	5.168087e+01	-3.260621e+00	-4.377668e+00	4.641916e-01	8.642821e-01	-6.529313e-01	-1.475578e+01	-1.627250e+01	-2.671073e+01	1.557577e+01	-1.622656e+01	-9.279297e+00
9.870000e+02	3.288357e+03	2.160532e+01	7.804232e+00	-4.602069e+00	-7.084539e+00	6.548620e+01	3.945208e+01	-1.028062e+01	-8.114625e+00	-9.209754e+00	-3.799695e+00	-7.044195e+00	-2.214281e+01	-2.538671e+01	-3.621042e+01	3.962119e+00	-2.258211e+01	-1.293396e+01
9.880000e+02	3.388322e+03	2.410289e+00	-2.412091e+00	-2.400446e+01	-2.188034e+01	5.223052e+01	2.908114e+01	-1.656073e+01	-1.396275e+01	-1.839628e+01	-9.058601e+00	-1.579912e+01	-3.023697e+01	-3.697678e+01	-4.494931e+01	-6.620318e+00	-2.739748e+01	-1.613730e+01
9.890000e+02	3.490209e+03	-5.193260e+00	-6.785438e+00	-3.787480e+01	-3.224425e+01	4.444023e+01	2.214951e+01	-2.162178e+01	-2.139192e+01	-2.641290e+01	-1.440168e+01	-2.618421e+01	-3.821726e+01	-4.999897e+01	-5.252119e+01	-1.493606e+01	-3.090919e+01	-1.901800e+01
9.900000e+02	3.598803e+03	-3.477187e+00	-6.532843e+00	-4.510164e+01	-3.820656e+01	4.283765e+01	1.938284e+01	-2.536984e+01	-2.968497e+01	-3.318020e+01	-1.967959e+01	-3.749679e+01	-4.555366e+01	-6.336994e+01	-5.885382e+01	-2.042522e+01	-3.359214e+01	-2.192352e+01
9.910000e+02	3.713474e+03	3.124614e+00	-4.160176e+00	-4.622528e+01	-4.069735e+01	4.671115e+01	2.044808e+01	-2.805337e+01	-3.807811e+01	-3.910227e+01	-2.504705e+01	-4.912869e+01	-5.204669e+01	-7.612732e+01	-6.413814e+01	-2.329691e+01	-3.596425e+01	-2.523657e+01
9.920000e+02	3.827294e+03	9.152863e+00	-2.758275e+00	-4.326214e+01	-4.119461e+01	5.414719e+01	2.402141e+01	-3.011675e+01	-4.589114e+01	-4.478911e+01	-3.078208e+01	-6.056527e+01	-5.773994e+01	-8.752204e+01	-6.868942e+01	-2.442753e+01	-3.841161e+01	-2.917380e+01
9.930000e+02	3.928134e+03	9.380251e+00	-5.190247e+00	-3.921694e+01	-4.135578e+01	6.252437e+01	2.809756e+01	-3.200587e+01	-5.261282e+01	-5.073086e+01	-3.705899e+01	-7.133956e+01	-6.275265e+01	-9.703207e+01	-7.278672e+01	-2.511488e+01	-4.108446e+01	-3.364731e+01
9.940000e+02	4.001246e+03	-6.233977e-02	-1.336379e+01	-3.738164e+01	-4.272019e+01	6.912978e+01	3.045901e+01	-3.399429e+01	-5.792545e+01	-5.704408e+01	-4.376785e+01	-8.097685e+01	-6.710736e+01	-1.043152e+02	-7.654053e+01	-2.675510e+01	-4.388219e+01	-3.824214e+01
9.950000e+02	4.032434e+03	-2.088026e+01	-2.774725e+01	-4.055117e+01	-4.649330e+01	7.174484e+01	2.919093e+01	-3.608563e+01	-6.167478e+01	-6.337374e+01	-5.045075e+01	-8.896427e+01	-7.062407e+01	-1.091365e+02	-7.982653e+01	-3.050974e+01	-4.651300e+01	-4.231318e+01
9.960000e+02	4.010993e+03	-5.226028e+01	-4.723177e+01	-5.032759e+01	-5.338224e+01	6.906983e+01	2.311611e+01	-3.801536e+01	-6.380988e+01	-6.896982e+01	-5.637545e+01	-9.476543e+01	-7.292089e+01	-1.113098e+02	-8.230184e+01	-3.702796e+01	-4.859283e+01	-4.515712e+01
9.970000e+02	3.931869e+03	-9.102569e+01	-6.936550e+01	-6.669983e+01	-6.346063e+01	6.090867e+01	1.204096e+01	-3.933854e+01	-6.432401e+01	-7.289271e+01	-6.071359e+01	-9.787895e+01	-7.351680e+01	-1.106812e+02	-8.349402e+01	-4.628269e+01	-4.974450e+01	-4.619100e+01
9.980000e+02	3.796807e+03	-1.322698e+02	-9.089863e+01	-8.803375e+01	-7.607830e+01	4.810399e+01	-3.244498e+00	-3.956300e+01	-6.322083e+01	-7.426302e+01	-6.275488e+01	-9.792131e+01	-7.199192e+01	-1.071576e+02	-8.293064e+01	-5.755989e+01	-4.966857e+01	-4.507529e+01
9.990000e+02	3.614406e+03	-1.703414e+02	-1.085028e+02	-1.114861e+02	-8.986649e+01	3.227558e+01	-2.119574e+01	-3.828032e+01	-6.051471e+01	-7.247096e+01	-6.208270e+01	-9.470555e+01	-6.814102e+01	-1.007633e+02	-8.026563e+01	-6.960395e+01	-4.817623e+01	-4.175165e+01
1.000000e+03	3.399056e+03	-1.999776e+02	-1.194886e+02	-1.337160e+02	-1.028945e+02	1.545075e+01	-3.988742e+01	-3.525898e+01	-5.625795e+01	-6.729279e+01	-5.865955e+01	-8.829172e+01	-6.206274e+01	-9.169457e+01	-7.536478e+01	-8.088131e+01	-4.519173e+01	-3.640424e+01
1.001000e+03	3.168819e+03	-2.173412e+02	-1.223538e+02	-1.516733e+02	-1.130000e+02	-3.247040e-01	-5.741318e+01	-3.048684e+01	-5.057867e+01	-5.890708e+01	-5.280849e+01	-7.899871e+01	-5.415642e+01	-8.034651e+01	-6.833309e+01	-8.989381e+01	-4.074293e+01	-2.938090e+01
1.002000e+03	2.942527e+03	-2.207215e+02	-1.170394e+02	-1.632341e+02	-1.182463e+02	-1.332664e+01	-7.220364e+01	-2.416999e+01	-4.371209e+01	-4.783868e+01	-4.511309e+01	-6.738047e+01	-4.503587e+01	-6.730333e+01	-5.949171e+01	-9.546483e+01	-3.495665e+01	-2.111614e+01
1.003000e+03	2.736668e+03	-2.107108e+02	-1.048435e+02	-1.675234e+02	-1.173901e+02	-2.239861e+01	-8.319761e+01	-1.670375e+01	-3.601177e+01	-3.486849e+01	-3.627850e+01	-5.417614e+01	-3.539800e+01	-5.329590e+01	-4.932639e+01	-9.693425e+01	-2.806415e+01	-1.208112e+01
1.004000e+03	2.562834e+03	-1.897749e+02	-8.801094e+01	-1.648698e+02	-1.101953e+02	-2.706955e+01	-8.985407e+01	-8.625388e+00	-2.793216e+01	-2.093297e+01	-2.699545e+01	-4.023934e+01	-2.589125e+01	-3.913555e+01	-3.842590e+01	-9.422335e+01	-2.040456e+01	-2.759560e+00
1.005000e+03	2.426466e+03	-1.612817e+02	-6.909026e+01	-1.564408e+02	-9.745309e+01	-2.751496e+01	-9.203326e+01	-5.470513e-01	-1.997744e+01	-7.012982e+00	-1.783093e+01	-2.644298e+01	-1.701352e+01	-2.562611e+01	-2.741058e+01	-8.775881e+01	-1.240248e+01	6.373220e+00
1.006000e+03	2.327247e+03	-1.282335e+02	-5.020589e+01	-1.436784e+02	-8.065299e+01	-2.434981e+01	-8.979577e+01	6.939939e+00	-1.261673e+01	6.003661e+00	-9.146678e+00	-1.355264e+01	-9.042454e+00	-1.344905e+01	-1.683589e+01	-7.827159e+01	-4.498111e+00	1.489600e+01
1.007000e+03	2.261018e+03	-9.208705e+01	-3.244013e+01	-1.276921e+02	-6.138411e+01	-1.828267e+01	-8.317628e+01	1.339004e+01	-6.175471e+00	1.749317e+01	-1.033486e+00	-2.072027e+00	-1.982674e+00	-3.021895e+00	-7.059370e+00	-6.651350e+01	2.971102e+00	2.252452e+01
1.008000e+03	2.222585e+03	-5.211161e+01	-1.552618e+01	-1.087843e+02	-4.067246e+01	-9.721036e+00	-7.199501e+01	1.863702e+01	-7.290879e-01	2.727523e+01	6.742715e+00	7.909385e+00	4.480396e+00	5.646371e+00	1.910950e+00	-5.296584e+01	9.905562e+00	2.921376e+01
1.009000e+03	2.208471e+03	-5.633099e+00	2.001303e+00	-8.627672e+01	-1.852816e+01	1.527305e+00	-5.577906e+01	2.289036e+01	3.958705e+00	3.573649e+01	1.476093e+01	1.680504e+01	1.100198e+01	1.304541e+01	1.052580e+01	-3.764103e+01	1.653487e+01	3.523231e+01
1.010000e+03	2.218651e+03	5.075976e+01	2.218276e+01	-5.875539e+01	6.062424e+00	1.630377e+01	-3.386394e+01	2.673808e+01	8.406136e+00	4.381321e+01	2.388275e+01	2.548141e+01	1.852433e+01	2.012235e+01	1.967450e+01	-2.008030e+01	2.339843e+01	4.114884e+01
1.011000e+03	2.256511e+03	1.193579e+02	4.670186e+01	-2.473884e+01	3.461640e+01	3.580998e+01	-5.707796e+00	3.101609e+01	1.326450e+01	5.277133e+01	3.505880e+01	3.501983e+01	2.809278e+01	2.805324e+01	3.046750e+01	3.972106e-01	3.117778e+01	4.769048e+01
1.012000e+03	2.326769e+03	1.994839e+02	7.596625e+01	1.639964e+01	6.824583e+01	6.102159e+01	2.863174e+01	3.654998e+01	1.906798e+01	6.379307e+01	4.899886e+01	4.631114e+01	4.052879e+01	3.784057e+01	4.382819e+01	2.423681e+01	4.040406e+01	5.548285e+01
1.013000e+03	2.431803e+03	2.864372e+02	1.085681e+02	6.358650e+01	1.067045e+02	9.199286e+01	6.801272e+01	4.383486e+01	2.595637e+01	7.747522e+01	6.577909e+01	5.959680e+01	5.602931e+01	4.984661e+01	6.000470e+01	5.114080e+01	5.113325e+01	6.474527e+01
1.014000e+03	2.567572e+03	3.718047e+02	1.413779e+02	1.136636e+02	1.478127e+02	1.273320e+02	1.099382e+02	5.276496e+01	3.348311e+01	9.341990e+01	8.453341e+01	7.413814e+01	7.384070e+01	6.344514e+01	7.819398e+01	7.973744e+01	6.272443e+01	7.506059e+01
1.015000e+03	2.720876e+03	4.451956e+02	1.702823e+02	1.617239e+02	1.875743e+02	1.641062e+02	1.506956e+02	6.253046e+01	4.061264e+01	1.101066e+02	1.033956e+02	8.818888e+01	9.217962e+01	7.697276e+01	9.647456e+01	1.076194e+02	7.384144e+01	8.533610e+01
1.016000e+03	2.869595e+03	4.968747e+02	1.913149e+02	2.021441e+02	2.210300e+02	1.982933e+02	1.859652e+02	7.175195e+01	4.594747e+01	1.251537e+02	1.197910e+02	9.934933e+01	1.085070e+02	8.806530e+01	1.121485e+02	1.318042e+02	8.272250e+01	9.401198e+01
1.017000e+03	2.986688e+03	5.203766e+02	2.017652e+02	2.299863e+02	2.435743e+02	2.256881e+02	2.117609e+02	7.883532e+01	4.813026e+01	1.359299e+02	1.310411e+02	1.052250e+02	1.201235e+02	9.430753e+01	1.224270e+02	1.494832e+02	8.765234e+01	9.947469e+01
1.018000e+03	3.047190e+03	5.141781e+02	2.008762e+02	2.422642e+02	2.522564e+02	2.429796e+02	2.254029e+02	8.243676e+01	4.628396e+01	1.403245e+02	1.350972e+02	1.041720e+02	1.249049e+02	9.397979e+01	1.252374e+02	1.587855e+02	8.747842e+01	1.005409e+02
1.019000e+03	3.035989e+03	4.818849e+02	1.899131e+02	2.386261e+02	2.465861e+02	2.486308e+02	2.261812e+02	8.187260e+01	4.032897e+01	1.374009e+02	1.311452e+02	9.585750e+01	1.219164e+02	8.662886e+01	1.198557e+02	1.592698e+02	8.198382e+01	9.683764e+01
1.020000e+03	2.953408e+03	4.309529e+02	1.716316e+02	2.212538e+02	2.285727e+02	2.432489e+02	2.154728e+02	7.732160e+01	3.106326e+01	1.276905e+02	1.198560e+02	8.143246e+01	1.116777e+02	7.325430e+01	1.071328e+02	1.519647e+02	7.198234e+01	8.894120e+01
1.021000e+03	2.816223e+03	3.704586e+02	1.493678e+02	1.940798e+02	2.020302e+02	2.293137e+02	1.962811e+02	6.974583e+01	1.998680e+01	1.130215e+02	1.031975e+02	6.326281e+01	9.599037e+01	5.605580e+01	8.924024e+01	1.389654e+02	5.910976e+01	7.822875e+01
1.022000e+03	2.653479e+03	3.086671e+02	1.260578e+02	1.616390e+02	1.714349e+02	2.103589e+02	1.723699e+02	6.056671e+01	8.945346e+00	9.595324e+01	8.388827e+01	4.433229e+01	7.740788e+01	3.785186e+01	6.905006e+01	1.227523e+02	4.539695e+01	6.650703e+01
1.023000e+03	2.498536e+03	2.510909e+02	1.034682e+02	1.279168e+02	1.407272e+02	1.898855e+02	1.472866e+02	5.122287e+01	-2.821364e-01	7.902951e+01	6.469502e+01	2.752499e+01	5.855026e+01	2.138002e+01	4.937983e+01	1.054727e+02	3.277474e+01	5.555060e+01
1.024000e+03	2.380218e+03	1.994992e+02	8.183064e+01	9.548334e+01	1.123994e+02	1.703648e+02	1.235659e+02	4.276914e+01	-6.337308e+00	6.410359e+01	4.779650e+01	1.499769e+01	4.148855e+01	8.689341e+00	3.234649e+01	8.840611e+01	2.265712e+01	4.669355e+01
1.025000e+03	2.316058e+03	1.520483e+02	5.996535e+01	6.507369e+01	8.707013e+01	1.526369e+02	1.023095e+02	3.564261e+01	-8.510500e+00	5.193313e+01	3.437578e+01	7.780625e+00	2.735826e+01	7.625181e-01	1.899049e+01	7.174272e+01	1.569683e+01	4.057526e+01
1.026000e+03	2.309483e+03	1.044565e+02	3.587016e+01	3.568306e+01	6.360639e+01	1.358695e+02	8.320368e+01	2.964763e+01	-6.826468e+00	4.212949e+01	2.450258e+01	5.656035e+00	1.625956e+01	-2.587727e+00	9.220192e+00	5.471267e+01	1.174244e+01	3.707817e+01
1.027000e+03	2.351067e+03	5.192499e+01	7.636033e+00	5.165848e+00	3.973896e+01	1.180651e+02	6.492502e+01	2.413443e+01	-2.000817e+00	3.343417e+01	1.728711e+01	7.299566e+00	7.418580e+00	-2.569806e+00	2.036244e+00	3.601690e+01	9.977400e+00	3.544232e+01
1.028000e+03	2.422562e+03	-8.701565e+00	-2.556721e+01	-2.876235e+01	1.303002e+01	9.694627e+01	4.580274e+01	1.829379e+01	4.712298e+00	2.421726e+01	1.124073e+01	1.063637e+01	-4.610494e-01	-1.066296e+00	-4.051858e+00	1.444922e+01	9.195029e+00	3.451037e+01
1.029000e+03	2.501921e+03	-7.718579e+01	-6.276736e+01	-6.735795e+01	-1.804473e+01	7.094522e+01	2.456087e+01	1.147130e+01	1.175779e+01	1.305422e+01	4.756165e+00	1.334125e+01	-8.746572e+00	-1.623405e-01	-1.052622e+01	-1.045674e+01	8.146218e+00	3.304223e+01
1.030000e+03	2.567860e+03	-1.491880e+02	-1.010289e+02	-1.098875e+02	-5.321813e+01	3.999735e+01	9.385344e-01	3.412263e+00	1.756713e+01	-7.727938e-01	-3.400674e+00	1.338254e+01	-1.842952e+01	-1.647061e+00	-1.839962e+01	-3.795586e+01	5.880576e+00	3.003006e+01
1.031000e+03	2.603296e+03	-2.169368e+02	-1.359808e+02	-1.532657e+02	-9.007876e+01	5.885944e+00	-2.399890e+01	-5.626084e+00	2.084181e+01	-1.698645e+01	-1.371162e+01	9.481822e+00	-2.980025e+01	-6.607394e+00	-2.791562e+01	-6.597689e+01	1.992982e+00	2.494146e+01
1.032000e+03	2.597594e+03	-2.711266e+02	-1.628908e+02	-1.925292e+02	-1.244301e+02	-2.798160e+01	-4.797158e+01	-1.492095e+01	2.077030e+01	-3.432610e+01	-2.575452e+01	1.365490e+00	-4.234511e+01	-1.522549e+01	-3.850057e+01	-9.145029e+01	-3.296406e+00	1.783051e+01
1.033000e+03	2.547754e+03	-3.034021e+02	-1.779120e+02	-2.220612e+02	-1.512944e+02	-5.731068e+01	-6.800508e+01	-2.346978e+01	1.713102e+01	-5.086227e+01	-3.833592e+01	-1.026115e+01	-5.490880e+01	-2.683420e+01	-4.898310e+01	-1.110080e+02	-9.252161e+00	9.288388e+00
1.034000e+03	2.458524e+03	-3.085698e+02	-1.790572e+02	-2.371591e+02	-1.662333e+02	-7.794854e+01	-8.120229e+01	-3.025538e+01	1.026871e+01	-6.451762e+01	-4.986971e+01	-2.399321e+01	-6.607190e+01	-4.019535e+01	-5.800055e+01	-1.218352e+02	-1.488111e+01	2.534691e-01
1.035000e+03	2.341232e+03	-2.858389e+02	-1.665970e+02	-2.353775e+02	-1.665302e+02	-8.689656e+01	-8.552224e+01	-3.450767e+01	9.701528e-01	-7.362599e+01	-5.887006e+01	-3.814780e+01	-7.460828e+01	-5.388578e+01	-6.444074e+01	-1.223920e+02	-1.924293e+01	-8.255444e+00
1.036000e+03	2.211322e+03	-2.388320e+02	-1.428343e+02	-2.171857e+02	-1.518582e+02	-8.301920e+01	-8.032695e+01	-3.588656e+01	-9.713488e+00	-7.735271e+01	-6.438419e+01	-5.117923e+01	-7.985502e+01	-6.664966e+01	-6.776262e+01	-1.127814e+02	-2.170825e+01	-1.539722e+01
1.037000e+03	2.084928e+03	-1.745517e+02	-1.114372e+02	-1.857728e+02	-1.242847e+02	-6.727809e+01	-6.654989e+01	-3.454257e+01	-2.065103e+01	-7.585707e+01	-6.621996e+01	-6.196507e+01	-8.186640e+01	-7.761098e+01	-6.810025e+01	-9.468585e+01	-2.209078e+01	-2.068218e+01
1.038000e+03	1.975325e+03	-1.017405e+02	-7.660173e+01	-1.461552e+02	-8.770846e+01	-4.247034e+01	-4.646706e+01	-3.105360e+01	-3.079025e+01	-7.017360e+01	-6.490810e+01	-6.990973e+01	-8.131237e+01	-8.631341e+01	-6.614636e+01	-7.094184e+01	-2.063449e+01	-2.401956e+01
1.039000e+03	1.890331e+03	-2.908449e+01	-4.226149e+01	-1.039304e+02	-4.696224e+01	-1.257702e+01	-2.315885e+01	-2.626930e+01	-3.927540e+01	-6.187737e+01	-6.143695e+01	-7.488291e+01	-7.917691e+01	-9.262222e+01	-6.288433e+01	-4.490883e+01	-1.788417e+01	-2.563937e+01
1.040000e+03	1.831524e+03	3.639415e+01	-1.146062e+01	-6.404190e+01	-6.829583e+00	1.809727e+01	1.868687e-01	-2.110939e+01	-4.551674e+01	-5.264889e+01	-5.686960e+01	-7.705567e+01	-7.637433e+01	-9.655974e+01	-5.926753e+01	-1.979824e+01	-1.449299e+01	-2.592646e+01
1.041000e+03	1.795507e+03	9.048575e+01	1.405776e+01	-2.983242e+01	2.883210e+01	4.578779e+01	2.095651e+01	-1.636304e+01	-4.921141e+01	-4.386159e+01	-5.197865e+01	-7.670938e+01	-7.341747e+01	-9.814755e+01	-5.593807e+01	1.903808e+00	-1.102375e+01	-2.522798e+01
1.042000e+03	1.776690e+03	1.322488e+02	3.399514e+01	-2.562891e+00	5.771405e+01	6.793975e+01	3.760771e+01	-1.253092e+01	-5.032143e+01	-3.629269e+01	-4.701703e+01	-7.408262e+01	-7.024635e+01	-9.731131e+01	-5.305347e+01	1.881818e+01	-7.793866e+00	-2.370099e+01
1.043000e+03	1.770424e+03	1.636111e+02	4.931353e+01	1.851714e+01	7.930002e+01	8.353261e+01	4.984687e+01	-9.743335e+00	-4.902330e+01	-3.002171e+01	-4.169520e+01	-6.930109e+01	-6.627320e+01	-9.387852e+01	-5.026499e+01	3.078267e+01	-4.802853e+00	-2.125393e+01
1.044000e+03	1.775170e+03	1.881644e+02	6.171742e+01	3.555828e+01	9.465050e+01	9.298891e+01	5.843321e+01	-7.774856e+00	-4.564903e+01	-2.453486e+01	-3.536975e+01	-6.240846e+01	-6.063313e+01	-8.767132e+01	-4.686006e+01	3.865570e+01	-1.764304e+00	-1.760459e+01
1.045000e+03	1.792833e+03	2.095149e+02	7.292098e+01	5.111258e+01	1.057590e+02	9.771803e+01	6.467778e+01	-6.153437e+00	-4.063529e+01	-1.900049e+01	-2.737942e+01	-5.348177e+01	-5.256091e+01	-7.866281e+01	-4.203720e+01	4.385893e+01	1.763031e+00	-1.243516e+01
1.046000e+03	1.827251e+03	2.298051e+02	8.394737e+01	6.705792e+01	1.146763e+02	9.946848e+01	6.983043e+01	-4.332211e+00	-3.448583e+01	-1.262688e+01	-1.740815e+01	-4.277991e+01	-4.176270e+01	-6.713409e+01	-3.523053e+01	4.780408e+01	6.184666e+00	-5.585382e+00
1.047000e+03	1.881685e+03	2.490200e+02	9.474036e+01	8.383808e+01	1.227298e+02	9.973332e+01	7.460751e+01	-1.867238e+00	-2.773898e+01	-4.979622e+00	-5.734385e+00	-3.085074e+01	-2.863946e+01	-5.375552e+01	-2.636621e+01	5.141568e+01	1.168764e+01	2.795561e+00
1.048000e+03	1.956625e+03	2.653663e+02	1.042558e+02	1.003309e+02	1.301599e+02	9.942401e+01	7.905748e+01	1.461137e+00	-2.092697e+01	3.857840e+00	6.743129e+00	-1.852958e+01	-1.426135e+01	-3.953385e+01	-1.594255e+01	5.493665e+01	1.813716e+01	1.220637e+01
1.049000e+03	2.048985e+03	2.765084e+02	1.109887e+02	1.144072e+02	1.363192e+02	9.889749e+01	8.280065e+01	5.623894e+00	-1.451970e+01	1.334011e+01	1.873159e+01	-6.802714e+00	-8.440421e-02	-2.561861e+01	-4.888485e+00	5.807935e+01	2.509654e+01	2.188580e+01
1.050000e+03	2.152948e+03	2.810368e+02	1.136987e+02	1.239362e+02	1.403120e+02	9.825049e+01	8.548935e+01	1.041447e+01	-8.859880e+00	2.270327e+01	2.894781e+01	3.429786e+00	1.249262e+01	-1.302542e+01	5.750340e+00	6.041798e+01	3.196368e+01	3.100832e+01
1.051000e+03	2.261829e+03	2.794623e+02	1.120231e+02	1.277891e+02	1.417322e+02	9.767296e+01	8.722384e+01	1.557148e+01	-4.108136e+00	3.128509e+01	3.654456e+01	1.160645e+01	2.256018e+01	-2.378057e+00	1.516820e+01	6.180128e+01	3.816568e+01	3.890581e+01
1.052000e+03	2.369797e+03	2.743042e+02	1.067487e+02	1.264146e+02	1.411158e+02	9.764757e+01	8.869140e+01	2.088800e+01	-2.194998e-01	3.877759e+01	4.138787e+01	1.767118e+01	2.994576e+01	6.228817e+00	2.304453e+01	6.256815e+01	4.332720e+01	4.522557e+01
1.053000e+03	2.472494e+03	2.693046e+02	9.967588e+01	1.217784e+02	1.398871e+02	9.889146e+01	9.095525e+01	2.625483e+01	3.035403e+00	4.530173e+01	4.407279e+01	2.208349e+01	3.518105e+01	1.319137e+01	2.957306e+01	6.346887e+01	4.734176e+01	4.996414e+01
1.054000e+03	2.566387e+03	2.681786e+02	9.316048e+01	1.167533e+02	1.398442e+02	1.020914e+02	9.501126e+01	3.162356e+01	6.005142e+00	5.128004e+01	4.567520e+01	2.566287e+01	3.921256e+01	1.919975e+01	3.527012e+01	6.535873e+01	5.032330e+01	5.337457e+01
1.055000e+03	2.647552e+03	2.734407e+02	8.949809e+01	1.142467e+02	1.424547e+02	1.075920e+02	1.013454e+02	3.692011e+01	9.062737e+00	5.717954e+01	4.734813e+01	2.932343e+01	4.298783e+01	2.496257e+01	4.065999e+01	6.884250e+01	5.247413e+01	5.580268e+01
1.056000e+03	2.711099e+03	2.857139e+02	9.032106e+01	1.163875e+02	1.483036e+02	1.152045e+02	1.097077e+02	4.196533e+01	1.250535e+01	6.325373e+01	4.993026e+01	3.379498e+01	4.709432e+01	3.095845e+01	4.598837e+01	7.405115e+01	5.394442e+01	5.753650e+01
1.057000e+03	2.752109e+03	3.036561e+02	9.614423e+01	1.239955e+02	1.569263e+02	1.242192e+02	1.191910e+02	4.645267e+01	1.647510e+01	6.940238e+01	5.371456e+01	3.942595e+01	5.158897e+01	3.729979e+01	5.109238e+01	8.063777e+01	5.475719e+01	5.873736e+01
1.058000e+03	2.768082e+03	3.243838e+02	1.061513e+02	1.364049e+02	1.670510e+02	1.335893e+02	1.285484e+02	4.999857e+01	2.092162e+01	7.519785e+01	5.844036e+01	4.612192e+01	5.605671e+01	4.373773e+01	5.547123e+01	8.795207e+01	5.483228e+01	5.947000e+01
1.059000e+03	2.761842e+03	3.441259e+02	1.182623e+02	1.516039e+02	1.770783e+02	1.421736e+02	1.365769e+02	5.223855e+01	2.561361e+01	8.003691e+01	6.346577e+01	5.341284e+01	5.982810e+01	4.977470e+01	5.849962e+01	9.526378e+01	5.408604e+01	5.979099e+01
1.060000e+03	2.743279e+03	3.588502e+02	1.294695e+02	1.665945e+02	1.855310e+02	1.489155e+02	1.423891e+02	5.291639e+01	3.018979e+01	8.331897e+01	6.800657e+01	6.059309e+01	6.222613e+01	5.481226e+01	5.966310e+01	1.018969e+02	5.254309e+01	5.982401e+01
1.061000e+03	2.728563e+03	3.647348e+02	1.363831e+02	1.778761e+02	1.912632e+02	1.528996e+02	1.454700e+02	5.192223e+01	3.423094e+01	8.455876e+01	7.132647e+01	6.686810e+01	6.272822e+01	5.826952e+01	5.870263e+01	1.072067e+02	5.039366e+01	5.976423e+01
1.062000e+03	2.736531e+03	3.585378e+02	1.359097e+02	1.819846e+02	1.933787e+02	1.533145e+02	1.455423e+02	4.927150e+01	3.733771e+01	8.340755e+01	7.282717e+01	7.147434e+01	6.100762e+01	5.965450e+01	5.562700e+01	1.104424e+02	4.796635e+01	5.980487e+01
1.063000e+03	2.783221e+03	3.380365e+02	1.259717e+02	1.760657e+02	1.910026e+02	1.494286e+02	1.423671e+02	4.505912e+01	3.921136e+01	7.963648e+01	7.207114e+01	7.378932e+01	5.690652e+01	5.862446e+01	5.063970e+01	1.106300e+02	4.563667e+01	6.003427e+01
1.064000e+03	2.876527e+03	3.026432e+02	1.061510e+02	1.584729e+02	1.831544e+02	1.406897e+02	1.356448e+02	3.944089e+01	3.974056e+01	7.317035e+01	6.881576e+01	7.347070e+01	5.043333e+01	5.508803e+01	4.407370e+01	1.066319e+02	4.372597e+01	6.037656e+01
1.065000e+03	3.012971e+03	2.540779e+02	7.808243e+01	1.293391e+02	1.689233e+02	1.269859e+02	1.251238e+02	3.267274e+01	3.908439e+01	6.421758e+01	6.311207e+01	7.063006e+01	4.184112e+01	4.935884e+01	3.640222e+01	9.745666e+01	4.244236e+01	6.062417e+01
1.066000e+03	3.177805e+03	1.967063e+02	4.538762e+01	9.095921e+01	1.479431e+02	1.089776e+02	1.108874e+02	2.518762e+01	3.771526e+01	5.344505e+01	5.543864e+01	6.597372e+01	3.175541e+01	4.229019e+01	2.831258e+01	8.274210e+01	4.188029e+01	6.055086e+01
1.067000e+03	3.348329e+03	1.370943e+02	1.300622e+01	4.773274e+01	1.209300e+02	8.830210e+01	9.365419e+01	1.764434e+01	3.636784e+01	4.206201e+01	4.676292e+01	6.078675e+01	2.123963e+01	3.526312e+01	2.075066e+01	6.318499e+01	4.205294e+01	6.003707e+01
1.068000e+03	3.499155e+03	8.259454e+01	-1.401649e+01	5.454525e+00	8.992588e+01	6.744604e+01	7.487209e+01	1.087644e+01	3.585945e+01	3.167573e+01	3.841207e+01	5.666019e+01	1.167771e+01	2.992544e+01	1.482711e+01	4.065351e+01	4.291202e+01	5.912463e+01
1.069000e+03	3.607653e+03	3.930065e+01	-3.195332e+01	-3.002897e+01	5.799458e+01	4.921198e+01	5.646899e+01	5.714956e+00	3.680720e+01	2.388464e+01	3.171884e+01	5.497851e+01	4.436760e+00	2.769600e+01	1.154487e+01	1.783277e+01	4.432639e+01	5.795732e+01
1.070000e+03	3.658134e+03	1.015970e+01	-3.951282e+01	-5.444435e+01	2.840268e+01	3.591404e+01	4.030745e+01	2.733800e+00	3.933998e+01	1.973131e+01	2.754427e+01	5.633922e+01	4.058259e-01	2.920032e+01	1.142678e+01	-2.517568e+00	4.603260e+01	5.663577e+01
1.071000e+03	3.644047e+03	-5.883695e+00	-3.817877e+01	-6.639256e+01	3.624361e+00	2.861540e+01	2.757381e+01	2.026122e+00	4.294056e+01	1.925423e+01	2.588640e+01	6.017043e+01	-3.886096e-01	3.389493e+01	1.421710e+01	-1.839873e+01	4.760628e+01	5.507419e+01
1.072000e+03	3.568246e+03	-1.323198e+01	-3.159010e+01	-6.774329e+01	-1.535920e+01	2.675290e+01	1.840159e+01	3.124926e+00	4.652094e+01	2.137271e+01	2.578658e+01	6.477042e+01	1.114960e+00	4.009829e+01	1.883514e+01	-2.913209e+01	4.850661e+01	5.295414e+01
1.073000e+03	3.441726e+03	-1.766194e+01	-2.417968e+01	-6.287035e+01	-2.912141e+01	2.835012e+01	1.193573e+01	5.123928e+00	4.873861e+01	2.420324e+01	2.562770e+01	6.781949e+01	3.288625e+00	4.547991e+01	2.365854e+01	-3.539028e+01	4.820986e+01	4.982080e+01
1.074000e+03	3.281310e+03	-2.381889e+01	-1.959141e+01	-5.696232e+01	-3.918172e+01	3.076761e+01	6.837709e+00	6.964355e+00	4.845106e+01	2.570697e+01	2.373777e+01	6.719504e+01	4.393092e+00	4.784986e+01	2.705700e+01	-3.869352e+01	4.639266e+01	4.528859e+01
1.075000e+03	3.106633e+03	-3.317752e+01	-1.945729e+01	-5.403999e+01	-4.701574e+01	3.170564e+01	2.022615e+00	7.778652e+00	4.513824e+01	2.441255e+01	1.906328e+01	6.177327e+01	3.238085e+00	4.594758e+01	2.797104e+01	-4.060442e+01	4.308720e+01	3.926285e+01
1.076000e+03	2.936823e+03	-4.324964e+01	-2.293729e+01	-5.542877e+01	-5.313488e+01	3.006899e+01	-2.690058e+00	7.160234e+00	3.913345e+01	1.992713e+01	1.163622e+01	5.190124e+01	-3.395787e-01	3.992494e+01	2.630052e+01	-4.197218e+01	3.873173e+01	3.207379e+01
1.077000e+03	2.787391e+03	-4.832203e+01	-2.712228e+01	-5.924356e+01	-5.663387e+01	2.636419e+01	-6.298034e+00	5.265428e+00	3.158052e+01	1.304723e+01	2.644844e+00	3.936299e+01	-5.371436e+00	3.134620e+01	2.294785e+01	-4.253350e+01	3.408303e+01	2.446074e+01
1.078000e+03	2.667970e+03	-4.146605e+01	-2.811345e+01	-6.106065e+01	-5.539516e+01	2.248571e+01	-6.851699e+00	2.725129e+00	2.413721e+01	5.453524e+00	-5.918731e+00	2.686609e+01	-1.006659e+01	2.271767e+01	1.950481e+01	-4.101777e+01	3.001672e+01	1.741110e+01
1.079000e+03	2.581433e+03	-1.715426e+01	-2.241011e+01	-5.554242e+01	-4.688272e+01	2.097538e+01	-2.151369e+00	4.133295e-01	1.852639e+01	-8.690377e-01	-1.189687e+01	1.724437e+01	-1.241672e+01	1.672391e+01	1.770867e+01	-3.570918e+01	2.728695e+01	1.191418e+01
1.080000e+03	2.524590e+03	2.636808e+01	-8.180489e+00	-3.847772e+01	-2.924811e+01	2.402492e+01	9.320044e+00	-8.389182e-01	1.607184e+01	-4.262007e+00	-1.365593e+01	1.264900e+01	-1.087590e+01	1.542834e+01	1.886840e+01	-2.525845e+01	2.632821e+01	8.713900e+00
1.081000e+03	2.490218e+03	8.575218e+01	1.395849e+01	-8.571984e+00	-2.359550e+00	3.257607e+01	2.755830e+01	-4.899929e-01	1.734661e+01	-3.863027e+00	-1.058876e+01	1.397376e+01	-4.878178e+00	1.968360e+01	2.345535e+01	-9.452091e+00	2.716003e+01	8.134393e+00
1.082000e+03	2.469778e+03	1.527575e+02	4.088612e+01	3.161232e+01	3.162815e+01	4.583589e+01	5.061855e+01	1.576112e+00	2.202207e+01	2.168124e-01	-3.272541e+00	2.066290e+01	4.977116e+00	2.891178e+01	3.098021e+01	1.034731e+01	2.941473e+01	1.002179e+01
1.083000e+03	2.456029e+03	2.160336e+02	6.767787e+01	7.591335e+01	6.841413e+01	6.138083e+01	7.481954e+01	5.054548e+00	2.894988e+01	7.027869e+00	6.748538e+00	3.092327e+01	1.711914e+01	4.129309e+01	4.017273e+01	3.127769e+01	3.246756e+01	1.380816e+01
1.084000e+03	2.444839e+03	2.639751e+02	8.886700e+01	1.159977e+02	1.024236e+02	7.582086e+01	9.556336e+01	9.350918e+00	3.644896e+01	1.514762e+01	1.745787e+01	4.224564e+01	2.949183e+01	5.427888e+01	4.937873e+01	4.958719e+01	3.561962e+01	1.866983e+01
1.085000e+03	2.435773e+03	2.877610e+02	9.989819e+01	1.435382e+02	1.281676e+02	8.580186e+01	1.085310e+02	1.378637e+01	4.271677e+01	2.313267e+01	2.695533e+01	5.206292e+01	4.014880e+01	6.525576e+01	5.702424e+01	6.159761e+01	3.827450e+01	2.372866e+01
1.086000e+03	2.431466e+03	2.836089e+02	9.833907e+01	1.524591e+02	1.416472e+02	8.900927e+01	1.108577e+02	1.780333e+01	4.625366e+01	2.990378e+01	3.394312e+01	5.835380e+01	4.774877e+01	7.215892e+01	6.198943e+01	6.470002e+01	4.005807e+01	2.823686e+01
1.087000e+03	2.436093e+03	2.535376e+02	8.449201e+01	1.405383e+02	1.413234e+02	8.483884e+01	1.018857e+02	2.110413e+01	4.619151e+01	3.495396e+01	3.796843e+01	6.004085e+01	5.180089e+01	7.387289e+01	6.378729e+01	5.803787e+01	4.085467e+01	3.169694e+01
1.088000e+03	2.453529e+03	2.044527e+02	6.123958e+01	1.098875e+02	1.283248e+02	7.451774e+01	8.324906e+01	2.368381e+01	4.245276e+01	3.834481e+01	3.938381e+01	5.711308e+01	5.261927e+01	7.034822e+01	6.252891e+01	4.265093e+01	4.076309e+01	3.389557e+01
1.089000e+03	2.485801e+03	1.459322e+02	3.319306e+01	6.621922e+01	1.058531e+02	6.064785e+01	5.829480e+01	2.575949e+01	3.571860e+01	4.053144e+01	3.908549e+01	5.048968e+01	5.105679e+01	6.246073e+01	5.873838e+01	2.106266e+01	4.000032e+01	3.486120e+01
1.090000e+03	2.532351e+03	8.746992e+01	5.412178e+00	1.719876e+01	7.804198e+01	4.633394e+01	3.107894e+01	2.763279e+01	2.723378e+01	4.210104e+01	3.814706e+01	4.170100e+01	4.815019e+01	5.170391e+01	5.311882e+01	-3.501805e+00	3.879277e+01	3.477738e+01
1.091000e+03	2.590293e+03	3.602276e+01	-1.793477e+01	-2.957284e+01	4.869885e+01	3.418713e+01	5.293708e+00	2.953790e+01	1.850601e+01	4.351508e+01	3.746730e+01	3.248203e+01	4.480121e+01	3.981571e+01	4.635518e+01	-2.797195e+01	3.728958e+01	3.388690e+01
1.092000e+03	2.655509e+03	-5.497488e+00	-3.461718e+01	-6.837243e+01	2.035061e+01	2.551974e+01	-1.655280e+01	3.152259e+01	1.096703e+01	4.491825e+01	3.751166e+01	2.436144e+01	4.156383e+01	2.841334e+01	3.898902e+01	-5.009531e+01	3.551729e+01	3.240969e+01
1.093000e+03	2.724125e+03	-3.851688e+01	-4.485115e+01	-9.654238e+01	-6.157500e+00	1.996859e+01	-3.352780e+01	3.339264e+01	5.659711e+00	4.604489e+01	3.817985e+01	1.831068e+01	3.854602e+01	1.867656e+01	3.135366e+01	-6.876953e+01	3.337876e+01	3.048264e+01
1.094000e+03	2.793770e+03	-6.797641e+01	-5.118282e+01	-1.148691e+02	-3.149980e+01	1.563658e+01	-4.622939e+01	3.473106e+01	3.008849e+00	4.623098e+01	3.880174e+01	1.450748e+01	3.540392e+01	1.110937e+01	2.354269e+01	-8.405333e+01	3.068876e+01	2.812276e+01
1.095000e+03	2.864145e+03	-1.007457e+02	-5.780672e+01	-1.271871e+02	-5.732522e+01	9.681994e+00	-5.641790e+01	3.498886e+01	2.723798e+00	4.453077e+01	3.825487e+01	1.226445e+01	3.141076e+01	5.420098e+00	1.540277e+01	-9.695946e+01	2.723557e+01	2.521856e+01
1.096000e+03	2.936777e+03	-1.437177e+02	-6.949009e+01	-1.393817e+02	-8.558215e+01	-8.358883e-01	-6.647211e+01	3.362978e+01	3.862349e+00	3.992802e+01	3.519217e+01	1.015937e+01	2.560066e+01	5.677127e-01	6.568457e+00	-1.091398e+02	2.285649e+01	2.155994e+01
1.097000e+03	3.014172e+03	-2.019981e+02	-9.033749e+01	-1.580206e+02	-1.179184e+02	-1.809852e+01	-7.879932e+01	3.029583e+01	5.051757e+00	3.160962e+01	2.835083e+01	6.364385e+00	1.698629e+01	-5.000176e+00	-3.438987e+00	-1.225245e+02	1.751121e+01	1.691152e+01
1.098000e+03	3.098804e+03	-2.775193e+02	-1.226525e+02	-1.888645e+02	-1.552546e+02	-4.288186e+01	-9.529365e+01	2.494458e+01	4.819759e+00	1.923557e+01	1.687916e+01	-8.903609e-01	4.819358e+00	-1.295003e+01	-1.505498e+01	-1.389274e+02	1.132908e+01	1.111591e+01
1.099000e+03	3.192379e+03	-3.683078e+02	-1.661412e+02	-2.355136e+02	-1.975356e+02	-7.427537e+01	-1.169165e+02	1.790470e+01	1.951102e+00	3.114342e+00	5.883653e-01	-1.284030e+01	-1.117829e+01	-2.460667e+01	-2.850666e+01	-1.596254e+02	4.603463e+00	4.190923e+00
1.100000e+03	3.295537e+03	-4.685288e+02	-2.176507e+02	-2.984496e+02	-2.436286e+02	-1.098175e+02	-1.434639e+02	9.814002e+00	-4.227928e+00	-1.579708e+01	-1.996060e+01	-2.984000e+01	-3.069997e+01	-4.057895e+01	-4.371144e+01	-1.849610e+02	-2.282003e+00	-3.624587e+00
1.101000e+03	3.407944e+03	-5.693003e+02	-2.715388e+02	-3.746874e+02	-2.913516e+02	-1.459902e+02	-1.735643e+02	1.446955e+00	-1.371298e+01	-3.609285e+01	-4.357446e+01	-5.125370e+01	-5.290828e+01	-6.058700e+01	-6.028828e+01	-2.140628e+02	-8.981670e+00	-1.190547e+01
1.102000e+03	3.528537e+03	-6.601156e+02	-3.206281e+02	-4.581371e+02	-3.376433e+02	-1.789227e+02	-2.049088e+02	-6.510518e+00	-2.585900e+01	-5.625666e+01	-6.870575e+01	-7.560599e+01	-7.663475e+01	-8.353441e+01	-7.766944e+01	-2.448015e+02	-1.532099e+01	-2.014815e+01
1.103000e+03	3.655726e+03	-7.305710e+02	-3.575490e+02	-5.406030e+02	-3.788863e+02	-2.051070e+02	-2.346518e+02	-1.364746e+01	-3.955822e+01	-7.500783e+01	-9.377510e+01	-1.009194e+02	-1.006284e+02	-1.077720e+02	-9.523782e+01	-2.740471e+02	-2.136442e+01	-2.790510e+01
1.104000e+03	3.787491e+03	-7.720235e+02	-3.761567e+02	-6.131731e+02	-4.113625e+02	-2.219394e+02	-2.598803e+02	-1.989146e+01	-5.348220e+01	-9.150964e+01	-1.174008e+02	-1.251011e+02	-1.237301e+02	-1.314298e+02	-1.123947e+02	-2.982065e+02	-2.736201e+01	-3.488231e+01
1.105000e+03	3.921374e+03	-7.788210e+02	-3.726769e+02	-6.676532e+02	-4.317657e+02	-2.279820e+02	-2.780363e+02	-2.541510e+01	-6.630166e+01	-1.053523e+02	-1.384477e+02	-1.462396e+02	-1.448945e+02	-1.526859e+02	-1.285028e+02	-3.139175e+02	-3.356883e+01	-4.095054e+01
1.106000e+03	4.054409e+03	-7.488538e+02	-3.462930e+02	-6.977158e+02	-4.376542e+02	-2.229353e+02	-2.872080e+02	-3.042041e+01	-7.682371e+01	-1.163250e+02	-1.559013e+02	-1.627289e+02	-1.630674e+02	-1.698946e+02	-1.427280e+02	-3.187056e+02	-3.999544e+01	-4.606100e+01
1.107000e+03	4.182987e+03	-6.833377e+02	-2.990341e+02	-6.995497e+02	-4.277178e+02	-2.074056e+02	-2.862524e+02	-3.489110e+01	-8.403434e+01	-1.240856e+02	-1.686606e+02	-1.732295e+02	-1.770120e+02	-1.815805e+02	-1.538728e+02	-3.114073e+02	-4.619123e+01	-5.009898e+01
1.108000e+03	4.302695e+03	-5.859362e+02	-2.350175e+02	-6.719542e+02	-4.017736e+02	-1.825723e+02	-2.747524e+02	-3.841533e+01	-8.708068e+01	-1.278818e+02	-1.753814e+02	-1.765480e+02	-1.852065e+02	-1.863727e+02	-1.603141e+02	-2.922296e+02	-5.115933e+01	-5.273506e+01
1.109000e+03	4.408311e+03	-4.615422e+02	-1.592991e+02	-6.159760e+02	-3.604974e+02	-1.498499e+02	-2.528519e+02	-4.015140e+01	-8.525324e+01	-1.264495e+02	-1.744755e+02	-1.715524e+02	-1.859028e+02	-1.829794e+02	-1.601171e+02	-2.624384e+02	-5.345441e+01	-5.333645e+01
1.110000e+03	4.494229e+03	-3.152220e+02	-7.673613e+01	-5.343022e+02	-3.050162e+02	-1.106075e+02	-2.210479e+02	-3.895645e+01	-7.802290e+01	-1.181519e+02	-1.643076e+02	-1.572195e+02	-1.773714e+02	-1.702830e+02	-1.513345e+02	-2.238144e+02	-5.144784e+01	-5.098593e+01
1.111000e+03	4.555495e+03	-1.518719e+02	8.696856e+00	-4.306971e+02	-2.366026e+02	-6.600917e+01	-1.800538e+02	-3.364955e+01	-6.515630e+01	-1.013474e+02	-1.435631e+02	-1.328556e+02	-1.582872e+02	-1.475794e+02	-1.324341e+02	-1.781339e+02	-4.369398e+01	-4.463172e+01
1.112000e+03	4.589312e+03	2.306320e+01	9.383683e+01	-3.097647e+02	-1.567297e+02	-1.705907e+01	-1.308643e+02	-2.335092e+01	-4.688950e+01	-7.491906e+01	-1.117112e+02	-9.845930e+01	-1.281789e+02	-1.149267e+02	-1.027760e+02	-1.269483e+02	-2.931145e+01	-3.336156e+01
1.113000e+03	4.596416e+03	2.019280e+02	1.755118e+02	-1.772072e+02	-6.762963e+01	3.507601e+01	-7.509225e+01	-7.824138e+00	-2.410040e+01	-3.884915e+01	-6.946061e+01	-5.512725e+01	-8.784306e+01	-7.350923e+01	-6.304044e+01	-7.183175e+01	-8.301092e+00	-1.675509e+01
1.114000e+03	4.581528e+03	3.729540e+02	2.493515e+02	-4.050360e+01	2.675836e+01	8.848348e+01	-1.551992e+01	1.226100e+01	1.601689e+00	5.311160e+00	-1.907994e+01	-5.350145e+00	-3.961268e+01	-2.588232e+01	-1.550138e+01	-1.503502e+01	1.826355e+01	4.776300e+00
1.115000e+03	4.552313e+03	5.192152e+02	3.088754e+02	9.035911e+01	1.198491e+02	1.398406e+02	4.336701e+01	3.523167e+01	2.794474e+01	5.425339e+01	3.555230e+01	4.696435e+01	1.263713e+01	2.404986e+01	3.596991e+01	3.975956e+01	4.822629e+01	2.978557e+01
1.116000e+03	4.516917e+03	6.194647e+02	3.454932e+02	2.026730e+02	2.020447e+02	1.840002e+02	9.520240e+01	5.855287e+01	5.225874e+01	1.031550e+02	8.927958e+01	9.685865e+01	6.384451e+01	7.142439e+01	8.626955e+01	8.703080e+01	7.855822e+01	5.583939e+01
1.117000e+03	4.480903e+03	6.512478e+02	3.497186e+02	2.818343e+02	2.614102e+02	2.141837e+02	1.322190e+02	7.922752e+01	7.191120e+01	1.464049e+02	1.364071e+02	1.390864e+02	1.084975e+02	1.111777e+02	1.298144e+02	1.197380e+02	1.057927e+02	7.987489e+01
1.118000e+03	4.444807e+03	5.957270e+02	3.133680e+02	3.133818e+02	2.855074e+02	2.229643e+02	1.464649e+02	9.439377e+01	8.481866e+01	1.786985e+02	1.717375e+02	1.691211e+02	1.416425e+02	1.390272e+02	1.615725e+02	1.304706e+02	1.266284e+02	9.880944e+01
1.119000e+03	4.403378e+03	4.427949e+02	2.320286e+02	2.858919e+02	2.640207e+02	2.039029e+02	1.315187e+02	1.019702e+02	8.989226e+01	1.962175e+02	1.916483e+02	1.841374e+02	1.599202e+02	1.524106e+02	1.781194e+02	1.131591e+02	1.385730e+02	1.102393e+02
1.120000e+03	4.346932e+03	1.947423e+02	1.068953e+02	1.939018e+02	1.914151e+02	1.533639e+02	8.419803e+01	1.011542e+02	8.727655e+01	1.975315e+02	1.948906e+02	1.836517e+02	1.623178e+02	1.510803e+02	1.784028e+02	6.479123e+01	1.404549e+02	1.130068e+02
1.121000e+03	4.264446e+03	-1.328211e+02	-5.471397e+01	3.987035e+01	6.875904e+01	7.188440e+01	5.677988e+00	9.261041e+01	7.829932e+01	1.839167e+02	1.828467e+02	1.696036e+02	1.503857e+02	1.371442e+02	1.639593e+02	-1.348070e+01	1.326515e+02	1.074516e+02
1.122000e+03	4.147415e+03	-5.130757e+02	-2.403220e+02	-1.655420e+02	-9.589900e+01	-3.541237e+01	-9.837693e+01	7.829021e+01	6.514893e+01	1.589965e+02	1.591653e+02	1.458534e+02	1.278466e+02	1.145365e+02	1.385133e+02	-1.162369e+02	1.169691e+02	9.527649e+01
1.123000e+03	3.993337e+03	-9.122700e+02	-4.343080e+02	-4.049773e+02	-2.886907e+02	-1.595078e+02	-2.187004e+02	6.096081e+01	5.039413e+01	1.278610e+02	1.289223e+02	1.172927e+02	9.974515e+01	8.811740e+01	1.071187e+02	-2.346921e+02	9.623240e+01	7.910663e+01
1.124000e+03	3.807788e+03	-1.294618e+03	-6.201928e+02	-6.570914e+02	-4.921603e+02	-2.890021e+02	-3.439771e+02	4.362089e+01	3.651307e+01	9.600566e+01	9.761593e+01	8.889650e+01	7.144813e+01	6.273050e+01	7.516607e+01	-3.582144e+02	7.373770e+01	6.192481e+01
1.125000e+03	3.604476e+03	-1.626382e+03	-7.824833e+02	-8.995024e+02	-6.877790e+02	-4.118932e+02	-4.625026e+02	2.899493e+01	2.557572e+01	6.844483e+01	7.031809e+01	6.502453e+01	4.781461e+01	4.252280e+01	4.757995e+01	-4.758849e+02	5.274509e+01	4.657661e+01
1.126000e+03	3.403103e+03	-1.878555e+03	-9.078012e+02	-1.111123e+03	-8.580298e+02	-5.170769e+02	-5.634765e+02	1.922116e+01	1.913241e+01	4.919564e+01	5.116104e+01	4.910601e+01	3.271041e+01	3.065705e+01	2.837442e+01	-5.776354e+02	3.612021e+01	3.545688e+01
1.127000e+03	3.225404e+03	-2.028606e+03	-9.855633e+02	-1.273592e+03	-9.877804e+02	-5.953183e+02	-6.377793e+02	1.572611e+01	1.824649e+01	4.109030e+01	4.311964e+01	4.360998e+01	2.882353e+01	2.931545e+01	2.050441e+01	-6.548449e+02	2.612338e+01	3.036203e+01
1.128000e+03	3.090241e+03	-2.062303e+03	-1.008757e+03	-1.372218e+03	-1.065189e+03	-6.398179e+02	-6.784517e+02	1.918542e+01	2.353328e+01	4.570048e+01	4.789063e+01	5.004779e+01	3.757754e+01	3.973616e+01	2.578404e+01	-7.006590e+02	2.425765e+01	3.239996e+01
1.129000e+03	3.009024e+03	-1.976203e+03	-9.751547e+02	-1.397154e+03	-1.082649e+03	-6.467073e+02	-6.812554e+02	2.946297e+01	3.508018e+01	6.315872e+01	6.567455e+01	6.877547e+01	5.894312e+01	6.204538e+01	4.465547e+01	-7.104555e+02	3.108329e+01	4.184998e+01
1.130000e+03	2.982832e+03	-1.780250e+03	-8.887014e+02	-1.345217e+03	-1.038085e+03	-6.156954e+02	-6.455138e+02	4.550280e+01	5.222732e+01	9.184264e+01	9.484016e+01	9.856678e+01	9.112292e+01	9.485073e+01	7.578420e+01	-6.826935e+02	4.599313e+01	5.796019e+01
1.131000e+03	3.002188e+03	-1.498773e+03	-7.602321e+02	-1.221913e+03	-9.362824e+02	-5.507178e+02	-5.750018e+02	6.526500e+01	7.333095e+01	1.281329e+02	1.316862e+02	1.361985e+02	1.303223e+02	1.348356e+02	1.157158e+02	-6.199339e+02	6.706409e+01	7.879970e+01
1.132000e+03	3.049693e+03	-1.168020e+03	-6.065319e+02	-1.042420e+03	-7.894269e+02	-4.600762e+02	-4.782562e+02	8.586218e+01	9.572168e+01	1.665899e+02	1.706420e+02	1.764491e+02	1.709491e+02	1.767570e+02	1.589738e+02	-5.293954e+02	9.116670e+01	1.013543e+02
1.133000e+03	3.104785e+03	-8.296101e+02	-4.473470e+02	-8.301755e+02	-6.158837e+02	-3.555133e+02	-3.676590e+02	1.040060e+02	1.160361e+02	2.007941e+02	2.051431e+02	2.128240e+02	2.064845e+02	2.141659e+02	1.988768e+02	-4.223477e+02	1.144584e+02	1.219990e+02
1.134000e+03	3.149189e+03	-5.213741e+02	-3.009914e+02	-6.125650e+02	-4.369205e+02	-2.500632e+02	-2.571085e+02	1.167216e+02	1.309337e+02	2.247762e+02	2.291006e+02	2.389881e+02	2.309449e+02	2.408327e+02	2.290168e+02	-3.120701e+02	1.332153e+02	1.373083e+02
1.135000e+03	3.171443e+03	-2.688557e+02	-1.801157e+02	-4.146996e+02	-2.721084e+02	-1.551855e+02	-1.588469e+02	1.221121e+02	1.379942e+02	2.345928e+02	2.385087e+02	2.504748e+02	2.404823e+02	2.524484e+02	2.449394e+02	-2.108515e+02	1.447563e+02	1.449591e+02
1.136000e+03	3.169308e+03	-8.097977e+01	-8.939563e+01	-2.535405e+02	-1.350353e+02	-7.822870e+01	-8.061534e+01	1.198648e+02	1.364406e+02	2.294091e+02	2.325437e+02	2.459849e+02	2.344666e+02	2.479075e+02	2.453450e+02	-1.271338e+02	1.481025e+02	1.443700e+02
1.137000e+03	3.149659e+03	4.819840e+01	-2.616814e+01	-1.348310e+02	-3.108800e+01	-2.130667e+01	-2.435372e+01	1.112551e+02	1.273576e+02	2.115708e+02	2.136311e+02	2.276735e+02	2.155236e+02	2.295654e+02	2.322433e+02	-6.401611e+01	1.440795e+02	1.367802e+02
1.138000e+03	3.126304e+03	1.324721e+02	1.627909e+01	-5.421026e+01	4.174034e+01	1.788287e+01	1.294683e+01	9.860327e+01	1.132678e+02	1.855539e+02	1.863706e+02	2.002187e+02	1.884197e+02	2.022671e+02	2.099210e+02	-1.979255e+01	1.347897e+02	1.246933e+02
1.139000e+03	3.116701e+03	1.844184e+02	4.427507e+01	-1.997030e+00	8.942626e+01	4.364824e+01	3.660379e+01	8.438179e+01	9.720843e+01	1.561800e+02	1.557148e+02	1.690071e+02	1.581993e+02	1.714906e+02	1.831151e+02	9.727446e+00	1.226588e+02	1.108877e+02
1.140000e+03	3.138550e+03	2.084213e+02	6.020498e+01	3.056365e+01	1.174939e+02	5.940228e+01	5.101315e+01	7.032558e+01	8.166752e+01	1.268157e+02	1.251338e+02	1.381582e+02	1.283258e+02	1.413494e+02	1.551540e+02	2.821138e+01	1.094542e+02	9.739092e+01
1.141000e+03	3.206846e+03	1.988985e+02	6.139834e+01	4.644601e+01	1.276639e+02	6.560223e+01	5.729909e+01	5.690156e+01	6.779817e+01	9.828997e+01	9.551100e+01	1.091874e+02	9.958727e+01	1.132627e+02	1.268453e+02	3.652251e+01	9.568411e+01	8.482913e+01
1.142000e+03	3.331545e+03	1.444544e+02	4.191067e+01	4.155784e+01	1.171234e+02	5.947976e+01	5.290576e+01	4.333803e+01	5.520115e+01	6.895527e+01	6.520774e+01	8.081938e+01	7.020036e+01	8.581109e+01	9.656465e+01	3.223619e+01	8.061955e+01	7.240323e+01
1.143000e+03	3.515748e+03	3.602507e+01	-3.647596e+00	7.558615e+00	8.074488e+01	3.670605e+01	3.331745e+01	2.818419e+01	4.232658e+01	3.584460e+01	3.124758e+01	4.998822e+01	3.705140e+01	5.579120e+01	6.148395e+01	1.119420e+01	6.291023e+01	5.847760e+01
1.144000e+03	3.754475e+03	-1.247097e+02	-7.597476e+01	-6.252095e+01	1.522867e+01	-5.720729e+00	-4.852675e+00	1.016030e+01	2.730158e+01	-3.566635e+00	-8.875452e+00	1.357614e+01	-2.450427e+00	2.000041e+01	1.939974e+01	-2.959502e+01	4.151853e+01	4.152195e+01
1.145000e+03	4.034454e+03	-3.205768e+02	-1.685146e+02	-1.684132e+02	-7.677167e+01	-6.663139e+01	-6.078634e+01	-1.104805e+01	8.840668e+00	-4.971844e+01	-5.550791e+01	-2.982793e+01	-4.867097e+01	-2.299163e+01	-2.961690e+01	-8.903723e+01	1.656582e+01	2.101340e+01
1.146000e+03	4.335545e+03	-5.202815e+02	-2.676903e+02	-2.992217e+02	-1.845577e+02	-1.391827e+02	-1.278259e+02	-3.436850e+01	-1.311106e+01	-1.001169e+02	-1.059645e+02	-7.885744e+01	-9.890344e+01	-7.179687e+01	-8.245598e+01	-1.604112e+02	-1.027506e+01	-2.067566e+00
1.147000e+03	4.634050e+03	-6.857989e+02	-3.559847e+02	-4.342296e+02	-2.905465e+02	-2.114839e+02	-1.941564e+02	-5.746036e+01	-3.722567e+01	-1.496374e+02	-1.548544e+02	-1.294004e+02	-1.477437e+02	-1.222902e+02	-1.334408e+02	-2.320651e+02	-3.602207e+01	-2.534649e+01
1.148000e+03	4.907368e+03	-7.831100e+02	-4.167190e+02	-5.478762e+02	-3.745284e+02	-2.692858e+02	-2.457264e+02	-7.732885e+01	-6.115228e+01	-1.918819e+02	-1.955154e+02	-1.757029e+02	-1.885730e+02	-1.687608e+02	-1.758895e+02	-2.902728e+02	-5.718491e+01	-4.572548e+01
1.149000e+03	5.138479e+03	-7.921582e+02	-4.386973e+02	-6.170772e+02	-4.195003e+02	-2.998075e+02	-2.703692e+02	-9.119914e+01	-8.221366e+01	-2.210740e+02	-2.220202e+02	-2.120860e+02	-2.155848e+02	-2.056509e+02	-2.041722e+02	-3.232238e+02	-7.082152e+01	-6.034849e+01
1.150000e+03	5.318420e+03	-7.122615e+02	-4.190053e+02	-6.280454e+02	-4.168121e+02	-2.953014e+02	-2.615464e+02	-9.731945e+01	-9.815149e+01	-2.337599e+02	-2.309810e+02	-2.345896e+02	-2.255719e+02	-2.291806e+02	-2.154606e+02	-3.245981e+02	-7.544203e+01	-6.748229e+01
1.151000e+03	5.445543e+03	-5.612024e+02	-3.631004e+02	-5.800019e+02	-3.686154e+02	-2.550776e+02	-2.202794e+02	-9.540355e+01	-1.076449e+02	-2.296837e+02	-2.224696e+02	-2.419229e+02	-2.187904e+02	-2.382439e+02	-2.104902e+02	-2.953346e+02	-7.141520e+01	-6.697899e+01
1.152000e+03	5.521840e+03	-3.688429e+02	-2.824670e+02	-4.845412e+02	-2.867455e+02	-1.853751e+02	-1.546072e+02	-8.658129e+01	-1.104514e+02	-2.115625e+02	-1.997489e+02	-2.354308e+02	-1.986181e+02	-2.343001e+02	-1.930705e+02	-2.429740e+02	-6.073881e+01	-6.016975e+01
1.153000e+03	5.548186e+03	-1.681188e+02	-1.909782e+02	-3.612527e+02	-1.886496e+02	-9.733847e+01	-7.693409e+01	-7.292624e+01	-1.071911e+02	-1.839481e+02	-1.680080e+02	-2.182115e+02	-1.702214e+02	-2.204250e+02	-1.685948e+02	-1.789787e+02	-4.629341e+01	-4.927715e+01
1.154000e+03	5.521109e+03	1.322035e+01	-1.013476e+02	-2.315923e+02	-9.209408e+01	-4.011749e+00	-4.144964e-01	-5.678085e+01	-9.893148e+01	-1.516995e+02	-1.326689e+02	-1.938490e+02	-1.388264e+02	-2.000066e+02	-1.421918e+02	-1.151939e+02	-3.089490e+01	-3.661765e+01
1.155000e+03	5.433043e+03	1.577374e+02	-2.267886e+01	-1.133523e+02	-1.063255e+01	8.257829e+01	6.428386e+01	-4.013845e+01	-8.677329e+01	-1.186681e+02	-9.792720e+01	-1.653022e+02	-1.082704e+02	-1.756455e+02	-1.172422e+02	-6.079386e+01	-1.650909e+01	-2.391516e+01
1.156000e+03	5.276298e+03	2.596531e+02	4.055653e+01	-1.736993e+01	4.880680e+01	1.534890e+02	1.108958e+02	-2.426709e+01	-7.158486e+01	-8.700110e+01	-6.598249e+01	-1.343184e+02	-8.029281e+01	-1.486287e+02	-9.474766e+01	-2.063025e+01	-3.880991e+00	-1.195196e+01
1.157000e+03	5.049052e+03	3.232835e+02	8.836136e+01	5.312937e+01	8.594931e+01	2.038473e+02	1.379226e+02	-9.626517e+00	-5.392791e+01	-5.713836e+01	-3.705447e+01	-1.014396e+02	-5.464759e+01	-1.190326e+02	-7.362380e+01	4.834321e+00	7.369516e+00	-6.063075e-01
1.158000e+03	4.760570e+03	3.600765e+02	1.243608e+02	1.012259e+02	1.055125e+02	2.329457e+02	1.478331e+02	3.989760e+00	-3.412666e+01	-2.829361e+01	-9.958428e+00	-6.641005e+01	-2.978520e+01	-8.623663e+01	-5.161180e+01	1.847098e+01	1.832271e+01	1.083745e+01
1.159000e+03	4.433086e+03	3.854664e+02	1.546451e+02	1.341506e+02	1.149572e+02	2.437829e+02	1.457520e+02	1.720826e+01	-1.239443e+01	9.056756e-01	1.712149e+01	-2.869716e+01	-3.710548e+00	-4.952891e+01	-2.633592e+01	2.503756e+01	3.023265e+01	2.329525e+01
1.160000e+03	4.099258e+03	4.160135e+02	1.864539e+02	1.611683e+02	1.225393e+02	2.422770e+02	1.381632e+02	3.082814e+01	1.104859e+01	3.187469e+01	4.596032e+01	1.209494e+01	2.530793e+01	-8.557113e+00	3.889937e+00	2.992437e+01	4.409875e+01	3.756407e+01
1.161000e+03	3.795970e+03	4.666729e+02	2.266864e+02	1.918263e+02	1.359839e+02	2.361921e+02	1.318300e+02	4.561753e+01	3.588670e+01	6.571430e+01	7.784636e+01	5.598330e+01	5.831284e+01	3.645015e+01	3.967316e+01	3.829679e+01	6.042926e+01	5.413798e+01
1.162000e+03	3.556679e+03	5.479316e+02	2.802497e+02	2.344279e+02	1.615847e+02	2.337405e+02	1.328506e+02	6.214514e+01	6.163426e+01	1.029855e+02	1.133257e+02	1.024746e+02	9.547113e+01	8.462036e+01	8.050515e+01	5.449174e+01	7.917896e+01	7.312537e+01
1.163000e+03	3.404901e+03	6.629455e+02	3.484516e+02	2.944802e+02	2.033473e+02	2.419069e+02	1.456930e+02	8.062042e+01	8.755604e+01	1.435130e+02	1.520385e+02	1.504487e+02	1.360019e+02	1.344124e+02	1.248935e+02	8.140648e+01	9.978441e+01	9.419324e+01
1.164000e+03	3.350756e+03	8.053728e+02	4.278554e+02	3.731159e+02	2.619990e+02	2.647460e+02	1.721954e+02	1.007354e+02	1.125882e+02	1.861709e+02	1.925894e+02	1.980242e+02	1.781309e+02	1.835658e+02	1.705078e+02	1.197605e+02	1.212265e+02	1.164930e+02
1.165000e+03	3.391198e+03	9.588922e+02	5.100846e+02	4.658708e+02	3.340758e+02	3.020833e+02	2.107517e+02	1.215406e+02	1.352996e+02	2.287078e+02	2.324836e+02	2.424675e+02	2.190827e+02	2.290665e+02	2.142982e+02	1.673879e+02	1.420978e+02	1.385896e+02
1.166000e+03	3.513238e+03	1.099146e+03	5.828891e+02	5.624242e+02	4.115910e+02	3.490742e+02	2.560509e+02	1.414184e+02	1.539488e+02	2.677427e+02	2.682306e+02	2.802740e+02	2.552036e+02	2.672469e+02	2.526558e+02	2.189298e+02	1.606991e+02	1.584734e+02
1.167000e+03	3.698719e+03	1.198065e+03	6.323911e+02	6.477798e+02	4.827632e+02	3.968950e+02	2.996767e+02	1.582115e+02	1.666775e+02	2.990592e+02	2.957074e+02	3.075264e+02	2.823163e+02	2.941349e+02	2.817161e+02	2.662879e+02	1.751996e+02	1.737389e+02
1.168000e+03	3.929025e+03	1.229556e+03	6.459684e+02	7.048872e+02	5.339146e+02	4.344998e+02	3.316016e+02	1.695267e+02	1.718268e+02	3.182299e+02	3.107909e+02	3.205314e+02	2.963255e+02	3.060656e+02	2.978472e+02	2.999415e+02	1.838726e+02	1.819538e+02
1.169000e+03	4.188542e+03	1.174900e+03	6.149248e+02	7.180954e+02	5.521298e+02	4.510082e+02	3.422400e+02	1.731637e+02	1.682988e+02	3.214572e+02	3.101406e+02	3.165940e+02	2.939685e+02	3.004213e+02	2.982453e+02	3.108532e+02	1.853642e+02	1.811486e+02
1.170000e+03	4.466212e+03	1.026184e+03	5.361237e+02	6.764057e+02	5.278745e+02	4.380539e+02	3.244633e+02	1.675605e+02	1.558396e+02	3.063996e+02	2.919176e+02	2.946806e+02	2.734970e+02	2.762594e+02	2.814655e+02	2.923854e+02	1.789220e+02	1.702741e+02
1.171000e+03	4.755189e+03	7.868929e+02	4.121386e+02	5.755034e+02	4.567442e+02	3.914321e+02	2.749620e+02	1.521249e+02	1.351271e+02	2.727161e+02	2.562068e+02	2.557202e+02	2.350650e+02	2.345778e+02	2.476999e+02	2.416058e+02	1.645053e+02	1.494619e+02
1.172000e+03	5.051059e+03	4.698667e+02	2.500529e+02	4.180174e+02	3.398693e+02	3.116408e+02	1.945940e+02	1.273523e+02	1.076165e+02	2.221467e+02	2.050021e+02	2.024129e+02	1.806867e+02	1.780971e+02	1.986975e+02	1.596043e+02	1.427444e+02	1.199907e+02
1.173000e+03	5.349519e+03	9.380538e+01	5.953734e+01	2.121700e+02	1.830640e+02	2.033006e+02	8.775811e+01	9.470698e+01	7.519979e+01	1.581137e+02	1.417668e+02	1.386085e+02	1.137981e+02	1.106394e+02	1.373688e+02	5.085096e+01	1.147789e+02	8.398015e+01
1.174000e+03	5.644524e+03	-3.202069e+02	-1.489889e+02	-3.043733e+01	-4.737920e+00	7.380350e+01	-3.882539e+01	5.633050e+01	3.981990e+01	8.500725e+01	7.073807e+01	6.849856e+01	3.859963e+01	3.635985e+01	6.724656e+01	-7.801696e+01	8.205292e+01	4.394167e+01
1.175000e+03	5.927770e+03	-7.510763e+02	-3.655112e+02	-2.969667e+02	-2.130670e+02	-6.827845e+01	-1.774225e+02	1.469513e+01	3.201461e+00	7.422246e+00	-3.777313e+00	-4.069620e+00	-4.057263e+01	-4.086521e+01	-7.986751e+00	-2.194537e+02	4.615688e+01	2.361010e+00
1.176000e+03	6.189774e+03	-1.178704e+03	-5.807358e+02	-5.747474e+02	-4.310376e+02	-2.145338e+02	-3.202904e+02	-2.768445e+01	-3.321066e+01	-7.040432e+01	-7.790113e+01	-7.592890e+01	-1.196618e+02	-1.176899e+02	-8.475643e+01	-3.659109e+02	8.759928e+00	-3.855865e+01
1.177000e+03	6.422093e+03	-1.584102e+03	-7.858584e+02	-8.517864e+02	-6.478985e+02	-3.575242e+02	-4.602455e+02	-6.842480e+01	-6.812821e+01	-1.448351e+02	-1.483819e+02	-1.445371e+02	-1.950387e+02	-1.911944e+02	-1.596330e+02	-5.102678e+02	-2.838396e+01	-7.696163e+01
1.178000e+03	6.619584e+03	-1.949405e+03	-9.722847e+02	-1.116704e+03	-8.532469e+02	-4.910526e+02	-5.908958e+02	-1.053547e+02	-1.002410e+02	-2.128030e+02	-2.125495e+02	-2.076883e+02	-2.634809e+02	-2.586202e+02	-2.292746e+02	-6.459296e+02	-6.342840e+01	-1.112817e+02
1.179000e+03	6.781461e+03	-2.258389e+03	-1.131712e+03	-1.358602e+03	-1.037253e+03	-6.100698e+02	-7.067395e+02	-1.365784e+02	-1.281424e+02	-2.716875e+02	-2.681884e+02	-2.632510e+02	-3.221533e+02	-3.172164e+02	-2.904552e+02	-7.668487e+02	-9.450646e+01	-1.401785e+02
1.180000e+03	6.910386e+03	-2.497547e+03	-1.256676e+03	-1.567256e+03	-1.191126e+03	-7.104674e+02	-8.032830e+02	-1.605947e+02	-1.504561e+02	-3.192932e+02	-3.135002e+02	-3.091545e+02	-3.687322e+02	-3.643870e+02	-3.402983e+02	-8.676725e+02	-1.199217e+02	-1.625650e+02
1.181000e+03	7.009770e+03	-2.657313e+03	-1.341353e+03	-1.733683e+03	-1.307805e+03	-7.889496e+02	-8.771964e+02	-1.764859e+02	-1.661359e+02	-3.540275e+02	-3.472380e+02	-3.436779e+02	-4.016944e+02	-3.981347e+02	-3.767024e+02	-9.440533e+02	-1.384254e+02	-1.777453e+02
1.182000e+03	7.080482e+03	-2.732796e+03	-1.382236e+03	-1.850860e+03	-1.382630e+03	-8.430447e+02	-9.264108e+02	-1.841170e+02	-1.747965e+02	-3.752205e+02	-3.689576e+02	-3.659007e+02	-4.206549e+02	-4.175981e+02	-3.987909e+02	-9.930015e+02	-1.494791e+02	-1.856000e+02
1.183000e+03	7.118733e+03	-2.723608e+03	-1.378374e+03	-1.914226e+03	-1.413696e+03	-8.711938e+02	-9.500412e+02	-1.842318e+02	-1.768865e+02	-3.833941e+02	-3.792123e+02	-3.760498e+02	-4.265469e+02	-4.233842e+02	-4.071529e+02	-1.013102e+03	-1.533778e+02	-1.867016e+02
1.184000e+03	7.116612e+03	-2.632878e+03	-1.331115e+03	-1.921730e+03	-1.401674e+03	-8.728081e+02	-9.481027e+02	-1.783460e+02	-1.735792e+02	-3.802640e+02	-3.795040e+02	-3.754982e+02	-4.214658e+02	-4.174595e+02	-4.036893e+02	-1.004470e+03	-1.511476e+02	-1.822569e+02
1.185000e+03	7.065542e+03	-2.466010e+03	-1.243574e+03	-1.873471e+03	-1.349180e+03	-8.482285e+02	-9.211303e+02	-1.684105e+02	-1.663814e+02	-3.683596e+02	-3.718974e+02	-3.663315e+02	-4.081319e+02	-4.025654e+02	-3.910411e+02	-9.684767e+02	-1.442203e+02	-1.738418e+02
1.186000e+03	6.961401e+03	-2.229980e+03	-1.120186e+03	-1.771242e+03	-1.259975e+03	-7.986219e+02	-8.699133e+02	-1.563268e+02	-1.566103e+02	-3.503364e+02	-3.583823e+02	-3.506208e+02	-3.891135e+02	-3.813512e+02	-3.717777e+02	-9.073856e+02	-1.339940e+02	-1.629970e+02
1.187000e+03	6.808873e+03	-1.933663e+03	-9.666330e+02	-1.618396e+03	-1.138430e+03	-7.259289e+02	-7.955460e+02	-1.434753e+02	-1.449551e+02	-3.282320e+02	-3.402325e+02	-3.297124e+02	-3.660968e+02	-3.555759e+02	-3.476595e+02	-8.241244e+02	-1.214508e+02	-1.508295e+02
1.188000e+03	6.622664e+03	-1.589009e+03	-7.901391e+02	-1.420260e+03	-9.895230e+02	-6.329707e+02	-6.998482e+02	-1.304355e+02	-1.313158e+02	-3.029868e+02	-3.176615e+02	-3.038675e+02	-3.395135e+02	-3.257185e+02	-3.192857e+02	-7.223002e+02	-1.069927e+02	-1.377838e+02
1.189000e+03	6.424545e+03	-1.212205e+03	-5.997906e+02	-1.184945e+03	-8.193148e+02	-5.236996e+02	-5.859867e+02	-1.170069e+02	-1.149898e+02	-2.744539e+02	-2.899735e+02	-2.724369e+02	-3.087033e+02	-2.911658e+02	-2.862824e+02	-6.064109e+02	-9.056177e+01	-1.236809e+02
1.190000e+03	6.237165e+03	-8.236193e+02	-4.063533e+02	-9.239794e+02	-6.354921e+02	-4.034160e+02	-4.589432e+02	-1.025151e+02	-9.511765e+01	-2.419012e+02	-2.561791e+02	-2.345035e+02	-2.725611e+02	-2.508847e+02	-2.479437e+02	-4.820208e+02	-7.197707e+01	-1.080071e+02
1.191000e+03	6.077184e+03	-4.457343e+02	-2.212072e+02	-6.520550e+02	-4.474031e+02	-2.786648e+02	-3.254504e+02	-8.626405e+01	-7.119218e+01	-2.047677e+02	-2.158116e+02	-1.896953e+02	-2.303868e+02	-2.042697e+02	-2.040200e+02	-3.556041e+02	-5.131659e+01	-9.031762e+01
1.192000e+03	5.950566e+03	-9.924276e+01	-5.445822e+01	-3.854277e+02	-2.651800e+02	-1.565874e+02	-1.931927e+02	-6.793733e+01	-4.341603e+01	-1.633103e+02	-1.695625e+02	-1.387881e+02	-1.825610e+02	-1.517858e+02	-1.552854e+02	-2.338724e+02	-2.915066e+01	-7.057158e+01
1.193000e+03	5.851830e+03	2.013853e+02	8.717202e+01	-1.391487e+02	-9.801377e+01	-4.374408e+01	-6.940650e+01	-4.778689e+01	-1.278194e+01	-1.188367e+02	-1.194343e+02	-8.383059e+01	-1.307518e+02	-9.514726e+01	-1.036295e+02	-1.226684e+02	-6.517640e+00	-4.925384e+01
1.194000e+03	5.767244e+03	4.508972e+02	2.017425e+02	7.599507e+01	4.780723e+01	5.524770e+01	4.064767e+01	-2.656483e+01	1.911249e+01	-7.344842e+01	-6.834865e+01	-2.776967e+01	-7.759393e+01	-3.701393e+01	-5.166829e+01	-2.579550e+01	1.532911e+01	-2.725773e+01
1.195000e+03	5.680419e+03	6.531393e+02	2.919590e+02	2.555501e+02	1.701817e+02	1.386830e+02	1.347017e+02	-5.283674e+00	5.038866e+01	-2.947541e+01	-1.942105e+01	2.619857e+01	-2.603576e+01	1.958504e+01	-2.107908e+00	5.568616e+01	3.525457e+01	-5.622588e+00
1.196000e+03	5.578154e+03	8.173615e+02	3.632719e+02	4.013915e+02	2.710304e+02	2.077953e+02	2.134608e+02	1.503323e+01	7.918726e+01	1.106437e+01	2.473282e+01	7.522018e+01	2.129933e+01	7.178803e+01	4.279738e+01	1.232620e+02	5.247394e+01	1.471379e+01
1.197000e+03	5.454738e+03	9.521123e+02	4.207717e+02	5.193456e+02	3.544901e+02	2.656218e+02	2.794194e+02	3.346967e+01	1.038361e+02	4.669099e+01	6.233675e+01	1.170593e+02	6.243859e+01	1.171626e+02	8.143463e+01	1.797659e+02	6.656991e+01	3.301616e+01
1.198000e+03	5.313730e+03	1.059155e+03	4.660816e+02	6.151930e+02	4.240443e+02	3.150116e+02	3.348913e+02	4.916220e+01	1.228774e+02	7.629238e+01	9.233281e+01	1.500095e+02	9.597297e+01	1.536511e+02	1.126294e+02	2.275398e+02	7.730906e+01	4.867467e+01
1.199000e+03	5.167076e+03	1.130077e+03	4.955828e+02	6.906193e+02	4.797474e+02	3.565415e+02	3.800342e+02	6.115384e+01	1.350342e+02	9.872378e+01	1.139514e+02	1.726059e+02	1.207026e+02	1.793585e+02	1.352419e+02	2.666588e+02	8.438533e+01	6.103128e+01
1.200000e+03	5.031889e+03	1.147318e+03	5.008409e+02	7.408442e+02	5.167920e+02	3.872573e+02	4.117362e+02	6.830528e+01	1.392214e+02	1.124870e+02	1.262856e+02	1.834046e+02	1.353074e+02	1.924277e+02	1.478664e+02	2.939972e+02	8.725780e+01	6.925192e+01
1.201000e+03	4.925621e+03	1.089547e+03	4.712264e+02	7.550610e+02	5.261929e+02	4.008986e+02	4.239359e+02	6.939015e+01	1.346677e+02	1.157596e+02	1.281607e+02	1.810384e+02	1.383100e+02	1.911889e+02	1.488789e+02	3.036361e+02	8.519773e+01	7.236257e+01
1.202000e+03	4.860704e+03	9.395670e+02	3.978327e+02	7.196999e+02	4.975145e+02	3.896771e+02	4.093861e+02	6.339738e+01	1.211319e+02	1.068476e+02	1.184113e+02	1.645830e+02	1.284181e+02	1.745908e+02	1.368785e+02	2.885918e+02	7.754708e+01	6.947370e+01
1.203000e+03	4.840068e+03	6.918661e+02	2.772780e+02	6.233966e+02	4.227218e+02	3.470337e+02	3.622763e+02	4.993957e+01	9.912376e+01	8.489434e+01	9.644529e+01	1.340791e+02	1.051107e+02	1.427453e+02	1.113476e+02	2.433066e+02	6.407873e+01	6.011083e+01
1.204000e+03	4.855037e+03	3.571208e+02	1.140509e+02	4.618827e+02	2.997696e+02	2.703814e+02	2.807710e+02	2.959127e+01	7.001801e+01	5.053164e+01	6.282493e+01	9.095866e+01	6.919118e+01	9.732547e+01	7.322800e+01	1.660255e+02	4.529444e+01	4.450869e+01
1.205000e+03	4.886562e+03	-3.785038e+01	-7.935951e+01	2.410861e+02	1.346451e+02	1.628380e+02	1.685459e+02	3.996861e+00	3.598458e+01	6.176007e+00	1.959264e+01	3.816377e+01	2.304514e+01	4.161663e+01	2.514751e+01	6.021806e+01	2.252563e+01	2.374368e+01
1.206000e+03	4.909769e+03	-4.545422e+02	-2.845091e+02	-2.256022e+01	-5.883009e+01	3.334425e+01	3.479116e+01	-2.431706e+01	-2.615502e-01	-4.416424e+01	-2.979684e+01	-2.010885e+01	-2.951475e+01	-1.982658e+01	-2.880905e+01	-6.543856e+01	-2.207118e+00	-3.434626e-01
1.207000e+03	4.900666e+03	-8.501253e+02	-4.805193e+02	-3.046116e+02	-2.613316e+02	-1.048525e+02	-1.072993e+02	-5.236901e+01	-3.581518e+01	-9.550048e+01	-8.090432e+01	-7.894684e+01	-8.375129e+01	-8.179378e+01	-8.369276e+01	-1.984901e+02	-2.651734e+01	-2.539538e+01
1.208000e+03	4.843147e+03	-1.185598e+03	-6.480645e+02	-5.770797e+02	-4.517397e+02	-2.368403e+02	-2.430478e+02	-7.725113e+01	-6.793651e+01	-1.426840e+02	-1.289438e+02	-1.333696e+02	-1.346786e+02	-1.391045e+02	-1.344420e+02	-3.250896e+02	-4.804089e+01	-4.886892e+01
1.209000e+03	4.734390e+03	-1.432751e+03	-7.728684e+02	-8.136302e+02	-6.111700e+02	-3.490255e+02	-3.590894e+02	-9.660880e+01	-9.433271e+01	-1.812073e+02	-1.694637e+02	-1.789313e+02	-1.777382e+02	-1.872060e+02	-1.765923e+02	-4.326593e+02	-6.477828e+01	-6.836998e+01
1.210000e+03	4.587359e+03	-1.578564e+03	-8.480075e+02	-9.942833e+02	-7.263567e+02	-4.316773e+02	-4.457456e+02	-1.089704e+02	-1.133504e+02	-2.078338e+02	-1.989612e+02	-2.122140e+02	-2.093783e+02	-2.226314e+02	-2.068360e+02	-5.121811e+02	-7.533543e+01	-8.195316e+01
1.211000e+03	4.429885e+03	-1.626337e+03	-8.746209e+02	-1.108662e+03	-7.917202e+02	-4.804678e+02	-4.984923e+02	-1.138921e+02	-1.241078e+02	-2.209952e+02	-2.153738e+02	-2.312109e+02	-2.275105e+02	-2.433479e+02	-2.234144e+02	-5.596413e+02	-7.906493e+01	-8.837822e+01
1.212000e+03	4.300442e+03	-1.593466e+03	-8.609152e+02	-1.157195e+03	-8.097969e+02	-4.967314e+02	-5.183007e+02	-1.119283e+02	-1.265905e+02	-2.209411e+02	-2.184032e+02	-2.356033e+02	-2.318180e+02	-2.490184e+02	-2.263418e+02	-5.763845e+02	-7.613111e+01	-8.731005e+01
1.213000e+03	4.241124e+03	-1.506394e+03	-8.196713e+02	-1.150041e+03	-7.900189e+02	-4.864682e+02	-5.108625e+02	-1.044483e+02	-1.216915e+02	-2.096217e+02	-2.095931e+02	-2.268649e+02	-2.238463e+02	-2.411185e+02	-2.174208e+02	-5.683431e+02	-6.750089e+01	-7.941785e+01
1.214000e+03	4.288726e+03	-1.393826e+03	-7.648082e+02	-1.103962e+03	-7.461148e+02	-4.583895e+02	-4.849112e+02	-9.332227e+01	-1.111276e+02	-1.902791e+02	-1.920730e+02	-2.080843e+02	-2.067687e+02	-2.227803e+02	-1.999611e+02	-5.443204e+02	-5.482893e+01	-6.630695e+01
1.215000e+03	4.465420e+03	-1.279837e+03	-7.078640e+02	-1.037830e+03	-6.926833e+02	-4.215307e+02	-4.500178e+02	-8.051393e+01	-9.717084e+01	-1.667616e+02	-1.699329e+02	-1.834185e+02	-1.847691e+02	-1.982549e+02	-1.781497e+02	-5.137047e+02	-4.020130e+01	-5.023839e+01
1.216000e+03	4.771241e+03	-1.178617e+03	-6.553501e+02	-9.678958e+02	-6.417292e+02	-3.830730e+02	-4.143690e+02	-6.765061e+01	-8.219142e+01	-1.426778e+02	-1.473186e+02	-1.572186e+02	-1.621163e+02	-1.720164e+02	-1.561403e+02	-4.841562e+02	-2.574535e+01	-3.365969e+01
1.217000e+03	5.180901e+03	-1.092221e+03	-6.077038e+02	-9.041026e+02	-6.000239e+02	-3.469472e+02	-3.830485e+02	-5.567896e+01	-6.810733e+01	-1.206003e+02	-1.274717e+02	-1.330286e+02	-1.421582e+02	-1.477151e+02	-1.370868e+02	-4.598530e+02	-1.318570e+01	-1.865578e+01
1.218000e+03	5.646831e+03	-1.011836e+03	-5.600853e+02	-8.484080e+02	-5.679768e+02	-3.135356e+02	-3.572262e+02	-4.471464e+01	-5.591276e+01	-1.015672e+02	-1.120066e+02	-1.127652e+02	-1.265518e+02	-1.273102e+02	-1.224280e+02	-4.407534e+02	-3.482033e+00	-6.484650e+00
1.219000e+03	6.108637e+03	-9.220643e+02	-5.047058e+02	-7.955132e+02	-5.403008e+02	-2.804247e+02	-3.344202e+02	-3.414890e+01	-4.546686e+01	-8.505607e+01	-1.006694e+02	-9.637379e+01	-1.150006e+02	-1.107047e+02	-1.116910e+02	-4.230605e+02	3.316601e+00	2.644995e+00
1.220000e+03	6.506831e+03	-8.070048e+02	-4.339740e+02	-7.356597e+02	-5.082579e+02	-2.438652e+02	-3.097347e+02	-2.299233e+01	-3.565486e+01	-6.945227e+01	-9.167596e+01	-8.211443e+01	-1.056121e+02	-9.604999e+01	-1.029073e+02	-4.007436e+02	7.933991e+00	9.469965e+00
1.221000e+03	6.796829e+03	-6.565113e+02	-3.435966e+02	-6.586403e+02	-4.628612e+02	-2.004708e+02	-2.777552e+02	-1.035119e+01	-2.490426e+01	-5.286226e+01	-8.253201e+01	-6.741482e+01	-9.576990e+01	-8.065194e+01	-9.351172e+01	-3.677061e+02	1.148534e+01	1.527115e+01
1.222000e+03	6.958770e+03	-4.710466e+02	-2.348480e+02	-5.579358e+02	-3.981803e+02	-1.487304e+02	-2.346515e+02	4.119781e+00	-1.189981e+01	-3.399953e+01	-7.107119e+01	-5.001850e+01	-8.323239e+01	-6.217871e+01	-8.141260e+01	-3.200372e+02	1.499025e+01	2.131084e+01
1.223000e+03	7.000089e+03	-2.638721e+02	-1.154522e+02	-4.339271e+02	-3.138866e+02	-9.003701e+01	-1.799710e+02	1.994175e+01	3.750048e+00	-1.284214e+01	-5.636391e+01	-2.903315e+01	-6.708087e+01	-3.974890e+01	-6.585553e+01	-2.577663e+02	1.896158e+01	2.830593e+01
1.224000e+03	6.950397e+03	-5.991557e+01	1.154696e+00	-2.953591e+02	-2.163492e+02	-2.904270e+01	-1.176267e+02	3.580856e+01	2.114145e+01	9.159297e+00	-3.918956e+01	-5.507102e+00	-4.819437e+01	-1.451052e+01	-4.778629e+01	-1.856397e+02	2.321865e+01	3.612051e+01
1.225000e+03	6.850932e+03	1.084746e+02	9.800141e+01	-1.586270e+02	-1.179544e+02	2.675457e+01	-5.572576e+01	4.985516e+01	3.814217e+01	2.937988e+01	-2.191793e+01	1.766758e+01	-2.909940e+01	1.048765e+01	-2.961498e+01	-1.126634e+02	2.697660e+01	4.377465e+01
1.226000e+03	6.742410e+03	2.077405e+02	1.576196e+02	-4.501748e+01	-3.480790e+01	6.815317e+01	-5.185462e+00	6.009766e+01	5.187375e+01	4.469096e+01	-7.866367e+00	3.646768e+01	-1.327952e+01	3.105617e+01	-1.451799e+01	-5.048875e+01	2.914554e+01	4.973968e+01
1.227000e+03	6.655047e+03	2.095109e+02	1.651173e+02	2.335071e+01	1.651789e+01	8.588328e+01	2.252324e+01	6.488373e+01	5.942607e+01	5.223206e+01	-3.939102e-01	4.677500e+01	-4.228841e+00	4.294176e+01	-5.582132e+00	-1.107473e+01	2.869053e+01	5.238180e+01
1.228000e+03	6.603075e+03	9.546244e+01	1.105344e+02	2.772169e+01	2.222964e+01	7.232175e+01	1.783578e+01	6.320070e+01	5.854774e+01	5.000158e+01	-2.069975e+00	4.534923e+01	-4.601646e+00	4.281925e+01	-5.116007e+00	-4.302538e+00	2.489709e+01	5.037608e+01
1.229000e+03	6.584235e+03	-1.402566e+02	-9.881572e+00	-4.409612e+01	-2.633747e+01	2.284170e+01	-2.497379e+01	5.476698e+01	4.810155e+01	3.710797e+01	-1.417213e+01	3.044321e+01	-1.571506e+01	2.890195e+01	-1.431988e+01	-3.619941e+01	1.745974e+01	4.296156e+01
1.230000e+03	6.583315e+03	-4.908211e+02	-1.933412e+02	-1.961160e+02	-1.317008e+02	-6.347191e+01	-1.068624e+02	3.994035e+01	2.820799e+01	1.371634e+01	-3.657633e+01	1.984747e+00	-3.745922e+01	1.103477e+00	-3.329509e+01	-1.081366e+02	6.419423e+00	3.000936e+01
1.231000e+03	6.578151e+03	-9.377701e+02	-4.306959e+02	-4.239928e+02	-2.903779e+02	-1.837203e+02	-2.241150e+02	1.955287e+01	1.401879e-01	-1.913233e+01	-6.791991e+01	-3.854412e+01	-6.848218e+01	-3.910484e+01	-6.121423e+01	-2.169478e+02	-7.945311e+00	1.196845e+01
1.232000e+03	6.546560e+03	-1.452444e+03	-7.068421e+02	-7.156311e+02	-4.936484e+02	-3.314750e+02	-3.691218e+02	-5.218186e+00	-3.389969e+01	-5.964896e+01	-1.058530e+02	-8.832944e+01	-1.064545e+02	-8.892954e+01	-9.645964e+01	-3.556130e+02	-2.516718e+01	-1.021949e+01
1.233000e+03	6.472876e+03	-1.997834e+03	-1.001500e+03	-1.052032e+03	-7.284340e+02	-4.972467e+02	-5.314086e+02	-3.290724e+01	-7.102546e+01	-1.053253e+02	-1.472722e+02	-1.434423e+02	-1.483036e+02	-1.444724e+02	-1.366678e+02	-5.141380e+02	-4.454667e+01	-3.519054e+01
1.234000e+03	6.353017e+03	-2.531720e+03	-1.290911e+03	-1.408420e+03	-9.782420e+02	-6.691631e+02	-6.987192e+02	-6.180127e+01	-1.079264e+02	-1.529861e+02	-1.885745e+02	-1.991101e+02	-1.904579e+02	-2.009923e+02	-1.787900e+02	-6.805120e+02	-6.508155e+01	-6.124494e+01
1.235000e+03	6.197255e+03	-3.012056e+03	-1.550927e+03	-1.756290e+03	-1.224575e+03	-8.341006e+02	-8.582611e+02	-9.006356e+01	-1.412031e+02	-1.990603e+02	-2.260576e+02	-2.501986e+02	-2.292353e+02	-2.533753e+02	-2.193613e+02	-8.419144e+02	-8.548728e+01	-8.652318e+01
1.236000e+03	6.030150e+03	-3.404376e+03	-1.761308e+03	-2.067052e+03	-1.449272e+03	-9.794853e+02	-9.983400e+02	-1.159970e+02	-1.678303e+02	-2.401701e+02	-2.565421e+02	-2.920022e+02	-2.614568e+02	-2.969160e+02	-2.550867e+02	-9.863984e+02	-1.043937e+02	-1.093166e+02
1.237000e+03	5.887406e+03	-3.689335e+03	-1.910091e+03	-2.317169e+03	-1.637725e+03	-1.095622e+03	-1.110363e+03	-1.384005e+02	-1.857102e+02	-2.739336e+02	-2.781307e+02	-3.212423e+02	-2.852018e+02	-3.283129e+02	-2.836494e+02	-1.104985e+03	-1.206993e+02	-1.284677e+02
1.238000e+03	5.809757e+03	-3.867202e+03	-1.996311e+03	-2.493480e+03	-1.782102e+03	-1.177900e+03	-1.190718e+03	-1.568742e+02	-1.941696e+02	-2.996744e+02	-2.908435e+02	-3.369688e+02	-3.004406e+02	-3.465656e+02	-3.044424e+02	-1.193605e+03	-1.339514e+02	-1.437222e+02
1.239000e+03	5.834338e+03	-3.956627e+03	-2.029605e+03	-2.596544e+03	-1.883115e+03	-1.227923e+03	-1.241682e+03	-1.719056e+02	-1.941993e+02	-3.186809e+02	-2.968103e+02	-3.409736e+02	-3.092171e+02	-3.533803e+02	-3.188566e+02	-1.253999e+03	-1.445613e+02	-1.558568e+02
1.240000e+03	5.984698e+03	-3.987128e+03	-2.026386e+03	-2.640047e+03	-1.949108e+03	-1.252800e+03	-1.270612e+03	-1.846406e+02	-1.882802e+02	-3.337992e+02	-2.998060e+02	-3.374379e+02	-3.151663e+02	-3.527983e+02	-3.298853e+02	-1.292836e+03	-1.537078e+02	-1.664620e+02
1.241000e+03	6.261571e+03	-3.987733e+03	-2.003864e+03	-2.645803e+03	-1.992281e+03	-1.262546e+03	-1.287322e+03	-1.963830e+02	-1.797709e+02	-3.484103e+02	-3.041589e+02	-3.317973e+02	-3.224076e+02	-3.500462e+02	-3.410788e+02	-1.319015e+03	-1.629022e+02	-1.773898e+02
1.242000e+03	6.637384e+03	-3.976287e+03	-1.974251e+03	-2.635864e+03	-2.023329e+03	-1.266420e+03	-1.300412e+03	-2.079972e+02	-1.720074e+02	-3.651241e+02	-3.133361e+02	-3.291333e+02	-3.341308e+02	-3.499282e+02	-3.551783e+02	-1.340012e+03	-1.733472e+02	-1.900270e+02
1.243000e+03	7.057417e+03	-3.953836e+03	-1.941440e+03	-2.624772e+03	-2.046717e+03	-1.269620e+03	-1.313972e+03	-2.194531e+02	-1.673960e+02	-3.846753e+02	-3.286863e+02	-3.326172e+02	-3.513778e+02	-3.553090e+02	-3.729426e+02	-1.358758e+03	-1.853320e+02	-2.046556e+02
1.244000e+03	7.449020e+03	-3.906174e+03	-1.901322e+03	-2.615080e+03	-2.058706e+03	-1.271637e+03	-1.326013e+03	-2.297081e+02	-1.668157e+02	-4.054623e+02	-3.488139e+02	-3.425688e+02	-3.724937e+02	-3.662489e+02	-3.926486e+02	-1.372387e+03	-1.979223e+02	-2.201616e+02
1.245000e+03	7.737502e+03	-3.811300e+03	-1.845136e+03	-2.597757e+03	-2.048980e+03	-1.266839e+03	-1.329259e+03	-2.369875e+02	-1.695426e+02	-4.239277e+02	-3.698480e+02	-3.564817e+02	-3.934933e+02	-3.801273e+02	-4.105036e+02	-1.373418e+03	-2.091000e+02	-2.342322e+02
1.246000e+03	7.864457e+03	-3.648994e+03	-1.764030e+03	-2.556909e+03	-2.005032e+03	-1.246874e+03	-1.313877e+03	-2.393579e+02	-1.737058e+02	-4.356477e+02	-3.865309e+02	-3.699947e+02	-4.092292e+02	-3.926932e+02	-4.218271e+02	-1.352760e+03	-2.163206e+02	-2.439889e+02
1.247000e+03	7.802793e+03	-3.408316e+03	-1.652711e+03	-2.476401e+03	-1.917210e+03	-1.203731e+03	-1.270913e+03	-2.353614e+02	-1.770629e+02	-4.367011e+02	-3.937268e+02	-3.784018e+02	-4.149189e+02	-3.995939e+02	-4.225340e+02	-1.303181e+03	-2.172738e+02	-2.468210e+02
1.248000e+03	7.563512e+03	-3.090534e+03	-1.510934e+03	-2.345540e+03	-1.782241e+03	-1.132251e+03	-1.195083e+03	-2.244579e+02	-1.777543e+02	-4.247880e+02	-3.877951e+02	-3.780837e+02	-4.074531e+02	-3.977417e+02	-4.103261e+02	-1.221764e+03	-2.105415e+02	-2.411025e+02
1.249000e+03	7.192064e+03	-2.707648e+03	-1.342882e+03	-2.161898e+03	-1.604045e+03	-1.031353e+03	-1.086037e+03	-2.071228e+02	-1.747394e+02	-3.997159e+02	-3.673784e+02	-3.673319e+02	-3.860469e+02	-3.860003e+02	-3.851646e+02	-1.110562e+03	-1.959112e+02	-2.265454e+02
1.250000e+03	6.755727e+03	-2.278746e+03	-1.155535e+03	-1.931066e+03	-1.392158e+03	-9.039853e+02	-9.481125e+02	-1.846195e+02	-1.678093e+02	-3.631926e+02	-3.334572e+02	-3.463821e+02	-3.521288e+02	-3.650535e+02	-3.489710e+02	-9.756237e+02	-1.742839e+02	-2.041294e+02
1.251000e+03	6.326356e+03	-1.826729e+03	-9.572879e+02	-1.664572e+03	-1.159137e+03	-7.563497e+02	-7.891720e+02	-1.586191e+02	-1.573023e+02	-3.181970e+02	-2.888635e+02	-3.168799e+02	-3.087218e+02	-3.367379e+02	-3.048780e+02	-8.252567e+02	-1.473185e+02	-1.757439e+02
1.252000e+03	5.964036e+03	-1.376775e+03	-7.575279e+02	-1.377566e+03	-9.184649e+02	-5.970241e+02	-6.193142e+02	-1.308921e+02	-1.437844e+02	-2.683391e+02	-2.376277e+02	-2.812313e+02	-2.597372e+02	-3.033405e+02	-2.565092e+02	-6.685346e+02	-1.170564e+02	-1.437763e+02
1.253000e+03	5.706366e+03	-9.561111e+02	-5.669252e+02	-1.087324e+03	-6.836933e+02	-4.362930e+02	-4.499059e+02	-1.032073e+02	-1.279114e+02	-2.175113e+02	-1.844661e+02	-2.422152e+02	-2.095066e+02	-2.672553e+02	-2.076285e+02	-5.145835e+02	-8.571273e+01	-1.108287e+02
1.254000e+03	5.565732e+03	-5.935252e+02	-3.976320e+02	-8.125513e+02	-4.685581e+02	-2.855856e+02	-2.928946e+02	-7.741954e+01	-1.105116e+02	-1.698486e+02	-1.344828e+02	-2.029406e+02	-1.626036e+02	-2.310609e+02	-1.621725e+02	-3.725329e+02	-5.566079e+01	-7.959213e+01
1.255000e+03	5.533989e+03	-3.172056e+02	-2.625676e+02	-5.727036e+02	-2.870973e+02	-1.566950e+02	-1.600617e+02	-5.558553e+01	-9.275076e+01	-1.297626e+02	-9.293018e+01	-1.669278e+02	-1.237536e+02	-1.977507e+02	-1.243813e+02	-2.515662e+02	-2.947143e+01	-5.277292e+01
1.256000e+03	5.591406e+03	-1.506055e+02	-1.735257e+02	-3.865195e+02	-1.528912e+02	-6.053748e+01	-6.192064e+01	-3.992660e+01	-7.616969e+01	-1.017472e+02	-6.480908e+01	-1.379901e+02	-9.756357e+01	-1.707442e+02	-9.867249e+01	-1.605067e+02	-9.822521e+00	-3.292927e+01
1.257000e+03	5.715579e+03	-1.073529e+02	-1.385320e+02	-2.694949e+02	-7.717769e+01	-5.524147e+00	-6.280336e+00	-3.254203e+01	-6.247555e+01	-8.980372e+01	-5.421326e+01	-1.197370e+02	-8.794063e+01	-1.534640e+02	-8.907464e+01	-1.067367e+02	8.252636e-01	-2.215986e+01
1.258000e+03	5.886685e+03	-1.869297e+02	-1.593229e+02	-2.308032e+02	-6.634369e+01	4.091517e+00	3.190787e+00	-3.492641e+01	-5.312990e+01	-9.658295e+01	-6.352703e+01	-1.147861e+02	-9.729798e+01	-1.485567e+02	-9.832342e+01	-9.470113e+01	7.355986e-01	-2.170831e+01
1.259000e+03	6.087675e+03	-3.726735e+02	-2.298435e+02	-2.706145e+02	-1.197112e+02	-3.059451e+01	-3.205266e+01	-4.745725e+01	-4.890756e+01	-1.225296e+02	-9.272879e+01	-1.239795e+02	-1.258101e+02	-1.570605e+02	-1.269419e+02	-1.245130e+02	-1.058811e+01	-3.162522e+01
1.260000e+03	6.300724e+03	-6.328661e+02	-3.363284e+02	-3.787513e+02	-2.284573e+02	-1.027809e+02	-1.052267e+02	-6.904649e+01	-4.962115e+01	-1.653503e+02	-1.390533e+02	-1.459243e+02	-1.709919e+02	-1.778627e+02	-1.726608e+02	-1.911663e+02	-3.208057e+01	-5.061749e+01
1.261000e+03	6.503143e+03	-9.247578e+02	-4.590550e+02	-5.352298e+02	-3.760839e+02	-2.005850e+02	-2.048594e+02	-9.709336e+01	-5.412268e+01	-2.200141e+02	-1.971502e+02	-1.770426e+02	-2.277664e+02	-2.076586e+02	-2.304073e+02	-2.846434e+02	-6.111681e+01	-7.613915e+01
1.262000e+03	6.666139e+03	-1.200686e+03	-5.754046e+02	-7.127148e+02	-5.403705e+02	-3.085518e+02	-3.161362e+02	-1.277764e+02	-6.056888e+01	-2.793269e+02	-2.597296e+02	-2.121184e+02	-2.890345e+02	-2.414233e+02	-2.928977e+02	-3.909432e+02	-9.385402e+01	-1.046979e+02
1.263000e+03	6.758171e+03	-1.415096e+03	-6.635580e+02	-8.804552e+02	-6.963962e+02	-4.097814e+02	-4.227104e+02	-1.566273e+02	-6.684203e+01	-3.349689e+02	-3.185708e+02	-2.451825e+02	-3.466429e+02	-2.732546e+02	-3.517035e+02	-4.938557e+02	-1.258261e+02	-1.323091e+02
1.264000e+03	6.752211e+03	-1.531190e+03	-7.060248e+02	-1.008954e+03	-8.200669e+02	-4.883092e+02	-5.087297e+02	-1.792625e+02	-7.098717e+01	-3.787879e+02	-3.657179e+02	-2.705114e+02	-3.925796e+02	-2.973732e+02	-3.985650e+02	-5.771896e+02	-1.526502e+02	-1.550228e+02
1.265000e+03	6.634168e+03	-1.526150e+03	-6.923032e+02	-1.074480e+03	-8.915617e+02	-5.313461e+02	-5.608487e+02	-1.921164e+02	-7.155220e+01	-4.040997e+02	-3.946612e+02	-2.835343e+02	-4.201953e+02	-3.090685e+02	-4.267003e+02	-6.270995e+02	-1.707002e+02	-1.694586e+02
1.266000e+03	6.409023e+03	-1.394153e+03	-6.202346e+02	-1.062597e+03	-8.981792e+02	-5.310268e+02	-5.700002e+02	-1.930252e+02	-6.777090e+01	-4.067490e+02	-4.013106e+02	-2.814935e+02	-4.252370e+02	-3.054200e+02	-4.318686e+02	-6.341455e+02	-1.776290e+02	-1.732782e+02
1.267000e+03	6.102156e+03	-1.146884e+03	-4.959569e+02	-9.701132e+02	-8.361700e+02	-4.854194e+02	-5.326990e+02	-1.815430e+02	-5.958054e+01	-3.857282e+02	-3.845885e+02	-2.637646e+02	-4.065023e+02	-2.856783e+02	-4.129962e+02	-5.947551e+02	-1.726612e+02	-1.655210e+02
1.268000e+03	5.755284e+03	-8.115100e+02	-3.326174e+02	-8.052415e+02	-7.112844e+02	-3.986913e+02	-4.516652e+02	-1.589309e+02	-4.749999e+01	-3.432357e+02	-3.465245e+02	-2.318037e+02	-3.659719e+02	-2.512510e+02	-3.722460e+02	-5.118421e+02	-1.566179e+02	-1.467278e+02
1.269000e+03	5.418625e+03	-4.263305e+02	-1.481073e+02	-5.860317e+02	-5.379056e+02	-2.804304e+02	-3.355904e+02	-1.278324e+02	-3.240871e+01	-2.841647e+02	-2.918151e+02	-1.887401e+02	-3.083764e+02	-2.053012e+02	-3.145128e+02	-3.944480e+02	-1.316711e+02	-1.188053e+02
1.270000e+03	5.142402e+03	-3.455515e+01	3.788719e+01	-3.373481e+02	-3.368024e+02	-1.441895e+02	-1.979529e+02	-9.170994e+01	-1.526843e+01	-2.151254e+02	-2.269167e+02	-1.386831e+02	-2.402661e+02	-1.520323e+02	-2.464362e+02	-2.563982e+02	-1.008702e+02	-8.463868e+01
1.271000e+03	4.970968e+03	3.229227e+02	2.071403e+02	-8.678720e+01	-1.317450e+02	-5.387126e+00	-5.493629e+01	-5.417422e+01	3.168143e+00	-1.432096e+02	-1.588459e+02	-8.586651e+01	-1.687758e+02	-9.579622e+01	-1.751348e+02	-1.141160e+02	-6.752586e+01	-4.752245e+01
1.272000e+03	4.941594e+03	6.143507e+02	3.458869e+02	1.398792e+02	5.447221e+01	1.211621e+02	7.725785e+01	-1.836072e+01	2.260733e+01	-7.477699e+01	-9.395139e+01	-3.380826e+01	-1.003658e+02	-4.022263e+01	-1.069516e+02	1.607055e+01	-3.458692e+01	-1.054342e+01
1.273000e+03	5.087522e+03	8.218417e+02	4.468620e+02	3.228923e+02	2.037768e+02	2.236236e+02	1.851573e+02	1.349013e+01	4.335370e+01	-1.456287e+01	-3.695844e+01	1.530134e+01	-3.985545e+01	1.240435e+01	-4.652772e+01	1.205990e+02	-4.174303e+00	2.392208e+01
1.274000e+03	5.442337e+03	9.426723e+02	5.097983e+02	4.513495e+02	3.054072e+02	2.948449e+02	2.601428e+02	4.013961e+01	6.626788e+01	3.465973e+01	9.459378e+00	6.078863e+01	9.998137e+00	6.132733e+01	3.548806e+00	1.907040e+02	2.258772e+01	5.444852e+01
1.275000e+03	6.041207e+03	9.869398e+02	5.402723e+02	5.239670e+02	3.566824e+02	3.329095e+02	2.993832e+02	6.112589e+01	9.250606e+01	7.179700e+01	4.448627e+01	1.031778e+02	4.828613e+01	1.069775e+02	4.244672e+01	2.233264e+02	4.538692e+01	8.046460e+01
1.276000e+03	6.915364e+03	9.727736e+02	5.474378e+02	5.476951e+02	3.618977e+02	3.404504e+02	3.054047e+02	7.631375e+01	1.230814e+02	9.669889e+01	6.848236e+01	1.434672e+02	7.524959e+01	1.502343e+02	7.032245e+01	2.207673e+02	6.426550e+01	1.018639e+02
1.277000e+03	8.079391e+03	9.212191e+02	5.416379e+02	5.349501e+02	3.299808e+02	3.231184e+02	2.846101e+02	8.543668e+01	1.583858e+02	1.093569e+02	8.216864e+01	1.823067e+02	9.145959e+01	1.915976e+02	8.746887e+01	1.893867e+02	7.910148e+01	1.184945e+02
1.278000e+03	9.515362e+03	8.527829e+02	5.328369e+02	5.007264e+02	2.719598e+02	2.879250e+02	2.454152e+02	8.788527e+01	1.978787e+02	1.094941e+02	8.611929e+01	2.194883e+02	9.731958e+01	2.306886e+02	9.384350e+01	1.379335e+02	8.929882e+01	1.297758e+02
1.279000e+03	1.116130e+04	7.864663e+02	5.302426e+02	4.606942e+02	1.991807e+02	2.421306e+02	1.966919e+02	8.290971e+01	2.401280e+02	9.685064e+01	8.087084e+01	2.540698e+02	9.319585e+01	2.663950e+02	8.928272e+01	7.609048e+01	9.388766e+01	1.346669e+02
1.280000e+03	1.291148e+04	7.405801e+02	5.427228e+02	4.305952e+02	1.226547e+02	1.929336e+02	1.468996e+02	7.020530e+01	2.832534e+02	7.210656e+01	6.762696e+01	2.851555e+02	8.014987e+01	2.976789e+02	7.435779e+01	1.354038e+01	9.204832e+01	1.320646e+02
1.281000e+03	1.463198e+04	7.335854e+02	5.791000e+02	4.263069e+02	5.321116e+01	1.476887e+02	1.038463e+02	5.062010e+01	3.256143e+02	3.797052e+01	4.915300e+01	3.129655e+02	6.086379e+01	3.246770e+02	5.143293e+01	-4.052000e+01	8.384156e+01	1.214986e+02
1.282000e+03	1.618825e+04	7.832333e+02	6.474626e+02	4.634092e+02	1.686960e+00	1.140454e+02	7.467681e+01	2.659174e+01	3.664089e+02	-2.581989e-01	3.023574e+01	3.395597e+02	4.013173e+01	3.494567e+02	2.526532e+01	-7.775078e+01	7.077414e+01	1.038066e+02
1.283000e+03	1.747533e+04	9.033379e+02	7.532326e+02	5.553176e+02	-2.159682e+01	9.946302e+01	6.561685e+01	1.986259e+00	4.058295e+02	-3.520684e+01	1.719578e+01	3.686370e+02	2.439888e+01	3.758414e+02	2.603624e+00	-9.127854e+01	5.585217e+01	8.142689e+01
1.284000e+03	1.843911e+04	1.099027e+03	8.965617e+02	7.099370e+02	-8.355217e+00	1.099662e+02	8.121587e+01	-1.872581e+01	4.445986e+02	-5.908620e+01	1.637948e+01	4.042384e+02	2.026393e+01	4.081245e+02	-9.312639e+00	-7.668048e+01	4.298699e+01	5.808653e+01
1.285000e+03	1.908017e+04	1.362461e+03	1.070216e+03	9.258573e+02	4.549573e+01	1.485168e+02	1.231982e+02	-3.168604e+01	4.830357e+02	-6.594409e+01	3.211337e+01	4.487775e+02	3.241519e+01	4.490811e+02	-4.883892e+00	-3.315046e+01	3.592471e+01	3.793099e+01
1.286000e+03	1.943920e+04	1.671210e+03	1.259130e+03	1.189767e+03	1.378776e+02	2.136930e+02	1.893712e+02	-3.476625e+01	5.200964e+02	-5.359257e+01	6.497085e+01	5.012693e+02	6.184433e+01	4.981447e+02	1.793927e+01	3.561746e+01	3.711075e+01	2.440791e+01
1.287000e+03	1.957050e+04	1.990571e+03	1.442240e+03	1.476615e+03	2.597424e+02	2.993197e+02	2.731702e+02	-2.812196e+01	5.529118e+02	-2.436398e+01	1.111557e+02	5.566684e+02	1.051498e+02	5.506644e+02	5.679146e+01	1.213596e+02	4.694577e+01	1.934153e+01
1.288000e+03	1.951522e+04	2.279627e+03	1.596292e+03	1.753130e+03	3.960229e+02	3.953196e+02	3.642688e+02	-1.397661e+01	5.771696e+02	1.563974e+01	1.633503e+02	6.067841e+02	1.552988e+02	5.987343e+02	1.054640e+02	2.123193e+02	6.371648e+01	2.254897e+01
1.289000e+03	1.928533e+04	2.499348e+03	1.700551e+03	1.984009e+03	5.282947e+02	4.895650e+02	4.502968e+02	4.218657e+00	5.882830e+02	5.847478e+01	2.127441e+02	6.425368e+02	2.035898e+02	6.333839e+02	1.556855e+02	2.953895e+02	8.418957e+01	3.210600e+01
1.290000e+03	1.886414e+04	2.620367e+03	1.741001e+03	2.139050e+03	6.384448e+02	5.701617e+02	5.192557e+02	2.285905e+01	5.829021e+02	9.665861e+01	2.514626e+02	6.566991e+02	2.420563e+02	6.472938e+02	1.993989e+02	3.587933e+02	1.045932e+02	4.509624e+01
1.291000e+03	1.822185e+04	2.628263e+03	1.712885e+03	2.199101e+03	7.122659e+02	6.275232e+02	5.619215e+02	3.907442e+01	5.601387e+02	1.249861e+02	2.745042e+02	6.460478e+02	2.654266e+02	6.369709e+02	2.306920e+02	3.944991e+02	1.215995e+02	5.850828e+01
1.292000e+03	1.733825e+04	2.525229e+03	1.621053e+03	2.159212e+03	7.419544e+02	6.557848e+02	5.735151e+02	5.118003e+01	5.219865e+02	1.413231e+02	2.805647e+02	6.121271e+02	2.720134e+02	6.035760e+02	2.467894e+02	3.996246e+02	1.329909e+02	6.994635e+01
1.293000e+03	1.622248e+04	2.328226e+03	1.478350e+03	2.028367e+03	7.269402e+02	6.534000e+02	5.542123e+02	5.867773e+01	4.727797e+02	1.463391e+02	2.716442e+02	5.604389e+02	2.634095e+02	5.522041e+02	2.479710e+02	3.764524e+02	1.378822e+02	7.796587e+01
1.294000e+03	1.492180e+04	2.064705e+03	1.302736e+03	1.826362e+03	6.730780e+02	6.230007e+02	5.085073e+02	6.197415e+01	4.179556e+02	1.425549e+02	2.518118e+02	4.985346e+02	2.433427e+02	4.900652e+02	2.367218e+02	3.312055e+02	1.365668e+02	8.204360e+01
1.295000e+03	1.351660e+04	1.767306e+03	1.114023e+03	1.579133e+03	5.907285e+02	5.707038e+02	4.438188e+02	6.203061e+01	3.626590e+02	1.332368e+02	2.257572e+02	4.338639e+02	2.162977e+02	4.244040e+02	2.166276e+02	2.721463e+02	1.301740e+02	8.234071e+01
1.296000e+03	1.210466e+04	1.468740e+03	9.309019e+02	1.313994e+03	4.924489e+02	5.050294e+02	3.688792e+02	6.009369e+01	3.107381e+02	1.215706e+02	1.976994e+02	3.722142e+02	1.864555e+02	3.609699e+02	1.914843e+02	2.076990e+02	1.203282e+02	7.945321e+01
1.297000e+03	1.078112e+04	1.197471e+03	7.686158e+02	1.055844e+03	3.908858e+02	4.355439e+02	2.923313e+02	5.754214e+01	2.644365e+02	1.102840e+02	1.709304e+02	3.171778e+02	1.572239e+02	3.034710e+02	1.648370e+02	1.451048e+02	1.089095e+02	7.427165e+01
1.298000e+03	9.621329e+03	9.743977e+02	6.373536e+02	8.246570e+02	2.971382e+02	3.713301e+02	2.216995e+02	5.579406e+01	2.247289e+02	1.016216e+02	1.479107e+02	2.705561e+02	1.312793e+02	2.539244e+02	1.398750e+02	8.975005e+01	9.790699e+01	6.794770e+01
1.299000e+03	8.671098e+03	8.105294e+02	5.413336e+02	6.340755e+02	2.195720e+02	3.194505e+02	1.626710e+02	5.618709e+01	1.919660e+02	9.742168e+01	1.305866e+02	2.332005e+02	1.108100e+02	2.134238e+02	1.194326e+02	4.498216e+01	8.927604e+01	6.186813e+01
1.300000e+03	7.945485e+03	7.058560e+02	4.786132e+02	4.906950e+02	1.629632e+02	2.836665e+02	1.185623e+02	5.977396e+01	1.664061e+02	9.905707e+01	1.205625e+02	2.056892e+02	9.762017e+01	1.827469e+02	1.058366e+02	1.211631e+01	8.471101e+01	5.751926e+01
1.301000e+03	7.434138e+03	6.497463e+02	4.417281e+02	3.938740e+02	1.279558e+02	2.637431e+02	8.995266e+01	6.704384e+01	1.483456e+02	1.071433e+02	1.189273e+02	1.884453e+02	9.291477e+01	1.624328e+02	1.005055e+02	-9.537079e+00	8.531126e+01	5.619226e+01
1.302000e+03	7.109499e+03	6.231336e+02	4.191995e+02	3.361868e+02	1.109920e+02	2.556003e+02	7.461934e+01	7.764914e+01	1.378195e+02	1.211086e+02	1.257829e+02	1.812794e+02	9.683040e+01	1.523269e+02	1.034119e+02	-2.257817e+01	9.121254e+01	5.858701e+01
1.303000e+03	6.934493e+03	6.022915e+02	3.977331e+02	3.047643e+02	1.049219e+02	2.523623e+02	6.794335e+01	9.025563e+01	1.340839e+02	1.388557e+02	1.397328e+02	1.826846e+02	1.079624e+02	1.509142e+02	1.126747e+02	-3.118407e+01	1.013263e+02	6.445832e+01
1.304000e+03	6.867767e+03	5.634396e+02	3.646739e+02	2.835612e+02	1.003481e+02	2.460523e+02	6.382630e+01	1.026209e+02	1.352087e+02	1.567619e+02	1.576459e+02	1.893508e+02	1.231887e+02	1.548934e+02	1.245616e+02	-4.042665e+01	1.133364e+02	7.246545e+01
1.305000e+03	6.866514e+03	4.870661e+02	3.101562e+02	2.562018e+02	8.747524e+01	2.294441e+02	5.593143e+01	1.119403e+02	1.380552e+02	1.701529e+02	1.749171e+02	1.962691e+02	1.379825e+02	1.593343e+02	1.340430e+02	-5.532884e+01	1.240340e+02	8.032619e+01
1.306000e+03	6.888320e+03	3.609256e+02	2.284707e+02	2.087527e+02	5.800368e+01	1.975226e+02	3.889706e+01	1.154035e+02	1.387325e+02	1.741892e+02	1.862304e+02	1.975198e+02	1.471985e+02	1.584873e+02	1.358169e+02	-7.992576e+01	1.299533e+02	8.526676e+01
1.307000e+03	6.893829e+03	1.810889e+02	1.184078e+02	1.317449e+02	6.549063e+00	1.481679e+02	9.168376e+00	1.108114e+02	1.334136e+02	1.649154e+02	1.866196e+02	1.875193e+02	1.461116e+02	1.470106e+02	1.255070e+02	-1.166373e+02	1.281423e+02	8.464460e+01
1.308000e+03	6.851137e+03	-4.901276e+01	-1.738732e+01	2.100142e+01	-6.878291e+01	8.197179e+01	-3.475153e+01	9.706072e+01	1.192278e+02	1.401221e+02	1.724761e+02	1.622908e+02	1.313665e+02	1.211804e+02	1.006316e+02	-1.661452e+02	1.168294e+02	7.655154e+01
1.309000e+03	6.741411e+03	-3.211084e+02	-1.737921e+02	-1.228110e+02	-1.667789e+02	1.385041e+00	-9.261713e+01	7.433338e+01	9.491317e+01	9.971838e+01	1.421739e+02	1.202997e+02	1.015216e+02	7.964654e+01	6.100219e+01	-2.277775e+02	9.576348e+01	6.020742e+01
1.310000e+03	6.563885e+03	-6.253550e+02	-3.449133e+02	-2.956491e+02	-2.842869e+02	-9.043414e+01	-1.631343e+02	4.393455e+01	6.100561e+01	4.550355e+01	9.613278e+01	6.257582e+01	5.704284e+01	2.348505e+01	8.430529e+00	-3.002293e+02	6.611937e+01	3.603274e+01
1.311000e+03	6.338046e+03	-9.533145e+02	-5.256325e+02	-4.920703e+02	-4.177624e+02	-1.906684e+02	-2.447553e+02	7.857437e+00	1.953035e+01	-1.952690e+01	3.638397e+01	-7.853146e+00	-1.686917e-01	-4.440653e+01	-5.408758e+01	-3.823439e+02	3.002899e+01	5.412099e+00
1.312000e+03	6.101471e+03	-1.299604e+03	-7.125057e+02	-7.070614e+02	-5.646313e+02	-2.974680e+02	-3.362856e+02	-3.173932e+01	-2.664791e+01	-9.201205e+01	-3.410054e+01	-8.692018e+01	-6.743297e+01	-1.202531e+02	-1.233259e+02	-4.736532e+02	-1.005190e+01	-2.972423e+01
1.313000e+03	5.903268e+03	-1.661514e+03	-9.036793e+02	-9.370602e+02	-7.239044e+02	-4.099841e+02	-4.370657e+02	-7.293462e+01	-7.454271e+01	-1.688311e+02	-1.119866e+02	-1.704391e+02	-1.418065e+02	-2.002593e+02	-1.964904e+02	-5.744244e+02	-5.187941e+01	-6.731848e+01
1.314000e+03	5.794567e+03	-2.036577e+03	-1.097803e+03	-1.179730e+03	-8.956815e+02	-5.278150e+02	-5.466080e+02	-1.141939e+02	-1.215689e+02	-2.472643e+02	-1.938409e+02	-2.546395e+02	-2.202498e+02	-2.810484e+02	-2.713318e+02	-6.850996e+02	-9.366529e+01	-1.054508e+02
1.315000e+03	5.818461e+03	-2.418934e+03	-1.292315e+03	-1.432484e+03	-1.079583e+03	-6.500526e+02	-6.637537e+02	-1.542599e+02	-1.657289e+02	-3.247342e+02	-2.760646e+02	-3.362038e+02	-2.994636e+02	-3.596024e+02	-3.457407e+02	-8.052286e+02	-1.339899e+02	-1.423961e+02
1.316000e+03	6.001867e+03	-2.795991e+03	-1.481797e+03	-1.690324e+03	-1.272630e+03	-7.742667e+02	-7.856298e+02	-1.918983e+02	-2.054864e+02	-3.983668e+02	-3.546841e+02	-4.119557e+02	-3.756110e+02	-4.328819e+02	-4.171225e+02	-9.322312e+02	-1.715050e+02	-1.765240e+02
1.317000e+03	6.350973e+03	-3.146976e+03	-1.657155e+03	-1.943928e+03	-1.467441e+03	-8.958188e+02	-9.068320e+02	-2.256640e+02	-2.394805e+02	-4.646841e+02	-4.252571e+02	-4.785017e+02	-4.442080e+02	-4.974517e+02	-4.819466e+02	-1.060480e+03	-2.046322e+02	-2.061610e+02
1.318000e+03	6.850753e+03	-3.444406e+03	-1.806124e+03	-2.178993e+03	-1.651624e+03	-1.007823e+03	-1.019265e+03	-2.538186e+02	-2.662764e+02	-5.196506e+02	-4.830791e+02	-5.321096e+02	-5.003718e+02	-5.494013e+02	-5.357633e+02	-1.181172e+03	-2.314414e+02	-2.295290e+02
1.319000e+03	7.467966e+03	-3.658430e+03	-1.915122e+03	-2.377405e+03	-1.808890e+03	-1.101872e+03	-1.112887e+03	-2.744484e+02	-2.842997e+02	-5.591056e+02	-5.237064e+02	-5.689585e+02	-5.394280e+02	-5.846788e+02	-5.737492e+02	-1.283227e+03	-2.497888e+02	-2.448226e+02
1.320000e+03	8.156441e+03	-3.762918e+03	-1.971969e+03	-2.520123e+03	-1.921773e+03	-1.169391e+03	-1.177304e+03	-2.857424e+02	-2.920038e+02	-5.794445e+02	-5.436556e+02	-5.857077e+02	-5.577078e+02	-5.997586e+02	-5.916122e+02	-1.355119e+03	-2.576741e+02	-2.504180e+02
1.321000e+03	8.863481e+03	-3.741522e+03	-1.968682e+03	-2.591028e+03	-1.975261e+03	-1.203250e+03	-1.203837e+03	-2.863444e+02	-2.882174e+02	-5.783316e+02	-5.410706e+02	-5.802067e+02	-5.532952e+02	-5.924300e+02	-5.865630e+02	-1.387189e+03	-2.536951e+02	-2.451635e+02
1.322000e+03	9.536562e+03	-3.591965e+03	-1.903549e+03	-2.580604e+03	-1.960273e+03	-1.199206e+03	-1.187506e+03	-2.756824e+02	-2.725583e+02	-5.552529e+02	-5.161775e+02	-5.521310e+02	-5.265173e+02	-5.624696e+02	-5.580686e+02	-1.373818e+03	-2.374566e+02	-2.286835e+02
1.323000e+03	1.012985e+04	-3.327449e+03	-1.781966e+03	-2.488409e+03	-1.875998e+03	-1.156797e+03	-1.128383e+03	-2.541999e+02	-2.457715e+02	-5.117928e+02	-4.714235e+02	-5.033666e+02	-4.800663e+02	-5.120084e+02	-5.081959e+02	-1.314880e+03	-2.098205e+02	-2.016265e+02
1.324000e+03	1.061013e+04	-2.975006e+03	-1.615916e+03	-2.323756e+03	-1.730481e+03	-1.079544e+03	-1.031957e+03	-2.234357e+02	-2.098732e+02	-4.515877e+02	-4.112677e+02	-4.380272e+02	-4.187240e+02	-4.454828e+02	-4.414717e+02	-1.216095e+03	-1.729294e+02	-1.657871e+02
1.325000e+03	1.096147e+04	-2.571364e+03	-1.422331e+03	-2.104533e+03	-1.539415e+03	-9.744970e+02	-9.084141e+02	-1.859195e+02	-1.680280e+02	-3.799497e+02	-3.416396e+02	-3.620598e+02	-3.487267e+02	-3.691466e+02	-3.642776e+02	-1.088242e+03	-1.299891e+02	-1.240377e+02
1.326000e+03	1.118769e+04	-2.157302e+03	-1.220692e+03	-1.854596e+03	-1.323520e+03	-8.513142e+02	-7.710301e+02	-1.448791e+02	-1.241558e+02	-3.031897e+02	-2.691177e+02	-2.824674e+02	-2.768470e+02	-2.901969e+02	-2.838823e+02	-9.454285e+02	-8.483920e+01	-8.003011e+01
1.327000e+03	1.131163e+04	-1.771447e+03	-1.030250e+03	-1.600253e+03	-1.105144e+03	-7.210487e+02	-6.340010e+02	-1.037877e+02	-8.233392e+01	-2.277131e+02	-1.999360e+02	-2.062597e+02	-2.093315e+02	-2.156558e+02	-2.072820e+02	-8.028087e+02	-4.138557e+01	-3.768182e+01
1.328000e+03	1.137049e+04	-1.444368e+03	-8.671720e+02	-1.366396e+03	-9.046981e+02	-5.947368e+02	-5.101071e+02	-6.583223e+01	-4.612480e+01	-1.590382e+02	-1.389942e+02	-1.393306e+02	-1.508894e+02	-1.512267e+02	-1.400807e+02	-6.741319e+02	-3.005928e+00	-5.360405e-01
1.329000e+03	1.140773e+04	-1.193803e+03	-7.419559e+02	-1.172702e+03	-7.374920e+02	-4.818655e+02	-4.085982e+02	-3.341341e+01	-1.797998e+01	-1.009461e+02	-8.909701e+01	-8.551193e+01	-1.039681e+02	-1.003841e+02	-8.566076e+01	-5.695236e+02	2.794541e+01	2.885067e+01
1.330000e+03	1.146293e+04	-1.021906e+03	-6.575930e+02	-1.030408e+03	-6.114306e+02	-3.888702e+02	-3.336713e+02	-7.803582e+00	1.135207e+00	-5.498289e+01	-5.063321e+01	-4.604282e+01	-6.851694e+01	-6.392779e+01	-4.484794e+01	-4.938610e+02	5.042168e+01	4.932194e+01
1.331000e+03	1.156248e+04	-9.153444e+02	-6.089931e+02	-9.402780e+02	-5.260187e+02	-3.179690e+02	-2.838744e+02	1.094930e+01	1.180792e+01	-2.046119e+01	-2.180716e+01	-1.960090e+01	-4.232834e+01	-4.012335e+01	-1.615073e+01	-4.460741e+02	6.469686e+01	6.121307e+01
1.332000e+03	1.171433e+04	-8.485661e+02	-5.840501e+02	-8.924022e+02	-4.729620e+02	-2.667249e+02	-2.526426e+02	2.384833e+01	1.592287e+01	5.033606e+00	6.283665e-01	-2.889958e+00	-2.187281e+01	-2.539236e+01	3.511126e+00	-4.196000e+02	7.212236e+01	6.609867e+01
1.333000e+03	1.190925e+04	-7.897503e+02	-5.663070e+02	-8.682348e+02	-4.383589e+02	-2.286224e+02	-2.299377e+02	3.256410e+01	1.615615e+01	2.479045e+01	2.035450e+01	8.384492e+00	-3.383030e+00	-1.535416e+01	1.782150e+01	-4.039868e+02	7.471382e+01	6.629059e+01
1.334000e+03	1.212927e+04	-7.080176e+02	-5.386597e+02	-8.446643e+02	-4.060396e+02	-1.946356e+02	-2.046426e+02	3.896163e+01	1.534899e+01	4.204068e+01	4.049549e+01	1.843000e+01	1.614014e+01	-5.926341e+00	3.012616e+01	-3.873369e+02	7.469558e+01	6.425725e+01
1.335000e+03	1.236100e+04	-5.800112e+02	-4.871378e+02	-7.992447e+02	-3.612267e+02	-1.554000e+02	-1.671083e+02	4.467623e+01	1.591528e+01	5.922482e+01	6.294650e+01	3.046569e+01	3.828956e+01	5.807873e+00	4.279243e+01	-3.590029e+02	7.412354e+01	6.214305e+01
1.336000e+03	1.260880e+04	-3.941556e+02	-4.037436e+02	-7.152128e+02	-2.935625e+02	-1.033548e+02	-1.111723e+02	5.084348e+01	1.941521e+01	7.764002e+01	8.818129e+01	4.621335e+01	6.312853e+01	2.115978e+01	5.699536e+01	-3.118415e+02	7.465693e+01	6.150272e+01
1.337000e+03	1.290190e+04	-1.517516e+02	-2.876617e+02	-5.849134e+02	-1.987782e+02	-3.424953e+01	-3.514677e+01	5.802020e+01	2.637147e+01	9.749147e+01	1.155162e+02	6.584403e+01	8.954115e+01	3.986814e+01	7.289075e+01	-2.434589e+02	7.747971e+01	6.326668e+01
1.338000e+03	1.329030e+04	1.348129e+02	-1.447423e+02	-4.107806e+02	-7.876312e+01	5.231441e+01	5.837177e+01	6.626107e+01	3.633470e+01	1.182206e+02	1.436442e+02	8.829512e+01	1.158567e+02	6.050661e+01	9.000730e+01	-1.562146e+02	8.331504e+01	6.786497e+01
1.339000e+03	1.382860e+04	4.456047e+02	1.427708e+01	-2.038723e+02	5.966829e+01	1.532433e+02	1.636192e+02	7.526874e+01	4.814295e+01	1.389036e+02	1.711788e+02	1.117784e+02	1.404800e+02	8.107844e+01	1.076456e+02	-5.614906e+01	9.245547e+01	7.539499e+01
1.340000e+03	1.455190e+04	7.570617e+02	1.760540e+02	1.924092e+01	2.066769e+02	2.628437e+02	2.731994e+02	8.453219e+01	6.028384e+01	1.585361e+02	1.969883e+02	1.342880e+02	1.623013e+02	9.959948e+01	1.251206e+02	4.869034e+01	1.047538e+02	8.573196e+01
1.341000e+03	1.545247e+04	1.045307e+03	3.267649e+02	2.400441e+02	3.513082e+02	3.738145e+02	3.795067e+02	9.340559e+01	7.126231e+01	1.761244e+02	2.202365e+02	1.539810e+02	1.807840e+02	1.145267e+02	1.417981e+02	1.499532e+02	1.195725e+02	9.853704e+01
1.342000e+03	1.646744e+04	1.288567e+03	4.537466e+02	4.410853e+02	4.829969e+02	4.780770e+02	4.757034e+02	1.011352e+02	7.989770e+01	1.906370e+02	2.402059e+02	1.693992e+02	1.957881e+02	1.249793e+02	1.569946e+02	2.402838e+02	1.357436e+02	1.131878e+02
1.343000e+03	1.748450e+04	1.468917e+03	5.466712e+02	6.079418e+02	5.925768e+02	5.674498e+02	5.562023e+02	1.068847e+02	8.550570e+01	2.009588e+02	2.560938e+02	1.795794e+02	2.072939e+02	1.307770e+02	1.698838e+02	3.140396e+02	1.516210e+02	1.287069e+02
1.344000e+03	1.836599e+04	1.573617e+03	5.984021e+02	7.302172e+02	6.729105e+02	6.343431e+02	6.168116e+02	1.098125e+02	8.795167e+01	2.059777e+02	2.669635e+02	1.841165e+02	2.152070e+02	1.323573e+02	1.795321e+02	3.675005e+02	1.652797e+02	1.437734e+02
1.345000e+03	1.898373e+04	1.596094e+03	6.055971e+02	8.018931e+02	7.192586e+02	6.725910e+02	6.547366e+02	1.092172e+02	8.758371e+01	2.048315e+02	2.719194e+02	1.831977e+02	2.193394e+02	1.306149e+02	1.850863e+02	3.987473e+02	1.748530e+02	1.568597e+02
1.346000e+03	1.925173e+04	1.536379e+03	5.690014e+02	8.212968e+02	7.294120e+02	6.783439e+02	6.685385e+02	1.047122e+02	8.507015e+01	1.972118e+02	2.704158e+02	1.775696e+02	2.195295e+02	1.266803e+02	1.860215e+02	4.073723e+02	1.789158e+02	1.664697e+02
1.347000e+03	1.914447e+04	1.400924e+03	4.933637e+02	7.907744e+02	7.035685e+02	6.507699e+02	6.580560e+02	9.635499e+01	8.118330e+01	1.835520e+02	2.625080e+02	1.683804e+02	2.157735e+02	1.216428e+02	1.822953e+02	3.941312e+02	1.767803e+02	1.713960e+02
1.348000e+03	1.869454e+04	1.202042e+03	3.870274e+02	7.161279e+02	6.440386e+02	5.923298e+02	6.243019e+02	8.466852e+01	7.658901e+01	1.649719e+02	2.488857e+02	1.568926e+02	2.082563e+02	1.162601e+02	1.743046e+02	3.606388e+02	1.685948e+02	1.709039e+02
1.349000e+03	1.797259e+04	9.573338e+02	2.613372e+02	6.059814e+02	5.550075e+02	5.085777e+02	5.694143e+02	7.054504e+01	7.170927e+01	1.429916e+02	2.306676e+02	1.441562e+02	1.972655e+02	1.107511e+02	1.626685e+02	3.092412e+02	1.552258e+02	1.647940e+02
1.350000e+03	1.705974e+04	6.891976e+02	1.299262e+02	4.713082e+02	4.425820e+02	4.076257e+02	4.967723e+02	5.508050e+01	6.670848e+01	1.191644e+02	2.090913e+02	1.307930e+02	1.830851e+02	1.047837e+02	1.479842e+02	2.431624e+02	1.379999e+02	1.533632e+02
1.351000e+03	1.602502e+04	4.239663e+02	7.751305e+00	3.251748e+02	3.151026e+02	2.994490e+02	4.112700e+02	3.941337e+01	6.160625e+01	9.481847e+01	1.852902e+02	1.170120e+02	1.659923e+02	9.771119e+01	1.307269e+02	1.668735e+02	1.184309e+02	1.373245e+02
1.352000e+03	1.491575e+04	1.899015e+02	-9.036852e+01	1.824123e+02	1.833470e+02	1.950729e+02	3.195287e+02	2.461835e+01	5.645929e+01	7.101435e+01	1.602719e+02	1.028561e+02	1.464067e+02	8.898809e+01	1.113657e+02	8.640747e+01	9.802823e+01	1.177386e+02
1.353000e+03	1.376176e+04	1.360752e+01	-1.518007e+02	5.869498e+01	6.006014e+01	1.055364e+02	2.297005e+02	1.165439e+01	5.151320e+01	4.867698e+01	1.350604e+02	8.853662e+01	1.251080e+02	7.858166e+01	9.061292e+01	9.232534e+00	7.820621e+01	9.595917e+01
1.354000e+03	1.258744e+04	-8.463928e+01	-1.684137e+02	-3.132480e+01	-4.154831e+01	4.054952e+01	1.506097e+02	1.327871e+00	4.723261e+01	2.875094e+01	1.108429e+02	7.465655e+01	1.033594e+02	6.717089e+01	6.962011e+01	-5.657725e+01	6.024372e+01	7.355661e+01
1.355000e+03	1.142321e+04	-9.518965e+01	-1.384346e+02	-7.660931e+01	-1.101478e+02	6.979191e+00	9.031103e+01	-5.766655e+00	4.417916e+01	1.223169e+01	8.896626e+01	6.217836e+01	8.280666e+01	5.601703e+01	4.995416e+01	-1.037787e+02	4.523032e+01	5.218086e+01
1.356000e+03	1.031003e+04	-2.120042e+01	-6.704214e+01	-7.221704e+01	-1.387147e+02	7.571733e+00	5.451214e+01	-9.328646e+00	4.279170e+01	2.916169e-02	7.074169e+01	5.215032e+01	6.515197e+01	4.655935e+01	3.332447e+01	-1.275265e+02	3.397770e+01	3.337025e+01
1.357000e+03	9.295788e+03	1.223805e+02	3.474332e+01	-2.059908e+01	-1.260768e+02	4.041644e+01	4.546476e+01	-9.415579e+00	4.318417e+01	-7.252758e+00	5.715952e+01	4.534773e+01	5.174669e+01	3.993412e+01	2.118443e+01	-1.264378e+02	2.693307e+01	1.835968e+01
1.358000e+03	8.426504e+03	3.127690e+02	1.526388e+02	6.899404e+01	-7.692777e+01	9.945909e+01	6.175616e+01	-6.435601e+00	4.507524e+01	-9.476617e+00	4.868435e+01	4.203486e+01	4.329961e+01	3.664979e+01	1.440456e+01	-1.027138e+02	2.415404e+01	7.956982e+00
1.359000e+03	7.737486e+03	5.247427e+02	2.722963e+02	1.828929e+02	-3.433025e-01	1.759681e+02	9.901913e+01	-1.044231e+00	4.789810e+01	-6.967143e+00	4.525265e+01	4.197571e+01	3.983434e+01	3.655744e+01	1.316340e+01	-6.131200e+01	2.537636e+01	2.524000e+00
1.360000e+03	7.248266e+03	7.354989e+02	3.820243e+02	3.062830e+02	9.252535e+01	2.604636e+02	1.511758e+02	6.029263e+00	5.104378e+01	-3.439144e-01	4.646724e+01	4.467100e+01	4.088779e+01	3.909191e+01	1.706987e+01	-8.590915e+00	3.014851e+01	2.043860e+00
1.361000e+03	6.962564e+03	9.274678e+02	4.741941e+02	4.261355e+02	1.906486e+02	3.444570e+02	2.116686e+02	1.416154e+01	5.411954e+01	9.710080e+00	5.186327e+01	4.966835e+01	4.581558e+01	4.362128e+01	2.540631e+01	4.898224e+01	3.796443e+01	6.217291e+00
1.362000e+03	6.871784e+03	1.088668e+03	5.450854e+02	5.328215e+02	2.845079e+02	4.214958e+02	2.742742e+02	2.295297e+01	5.709335e+01	2.261513e+01	6.108149e+01	5.675566e+01	5.402960e+01	4.970456e+01	3.733764e+01	1.056224e+02	4.832677e+01	1.453156e+01
1.363000e+03	6.959398e+03	1.211279e+03	5.935573e+02	6.201237e+02	3.665044e+02	4.873486e+02	3.334156e+02	3.224559e+01	6.024847e+01	3.791388e+01	7.384257e+01	6.591678e+01	6.505121e+01	5.712634e+01	5.198216e+01	1.564292e+02	6.071506e+01	2.627970e+01
1.364000e+03	7.204027e+03	1.289650e+03	6.193192e+02	6.840736e+02	4.307053e+02	5.395254e+02	3.841667e+02	4.204488e+01	6.395904e+01	5.514269e+01	8.972780e+01	7.705672e+01	7.837350e+01	6.570342e+01	6.833801e+01	1.972326e+02	7.448701e+01	4.054716e+01
1.365000e+03	7.580436e+03	1.318895e+03	6.215860e+02	7.214576e+02	4.724415e+02	5.765199e+02	4.222355e+02	5.237862e+01	6.837624e+01	7.362307e+01	1.078729e+02	8.962040e+01	9.322233e+01	7.497085e+01	8.514297e+01	2.244288e+02	8.877516e+01	5.620274e+01
1.366000e+03	8.059124e+03	1.294632e+03	5.986179e+02	7.288043e+02	4.881547e+02	5.971537e+02	4.441057e+02	6.313472e+01	7.315325e+01	9.226486e+01	1.267269e+02	1.022829e+02	1.083477e+02	8.390473e+01	1.007751e+02	2.350420e+02	1.024424e+02	7.192460e+01
1.367000e+03	8.605851e+03	1.213911e+03	5.482400e+02	7.023296e+02	4.756048e+02	6.002594e+02	4.473424e+02	7.391647e+01	7.732741e+01	1.094594e+02	1.440096e+02	1.128697e+02	1.219601e+02	9.082108e+01	1.132787e+02	2.270331e+02	1.141360e+02	8.627286e+01
1.368000e+03	9.182259e+03	1.076898e+03	4.690787e+02	6.388660e+02	4.343174e+02	5.847719e+02	4.309523e+02	8.395072e+01	7.942732e+01	1.231125e+02	1.569368e+02	1.185884e+02	1.318735e+02	9.352579e+01	1.205498e+02	1.997106e+02	1.224467e+02	9.780478e+01
1.369000e+03	9.748066e+03	8.887266e+02	3.620417e+02	5.374450e+02	3.660639e+02	5.501737e+02	3.956857e+02	9.208597e+01	7.779798e+01	1.308424e+02	1.626999e+02	1.165536e+02	1.358543e+02	8.970859e+01	1.206630e+02	1.540631e+02	1.261497e+02	1.052230e+02
1.370000e+03	1.026451e+04	6.608380e+02	2.314964e+02	4.009817e+02	2.751979e+02	4.971589e+02	3.442166e+02	9.691171e+01	7.105956e+01	1.303376e+02	1.591005e+02	1.044847e+02	1.321110e+02	7.749532e+01	1.122788e+02	9.289590e+01	1.244757e+02	1.075452e+02
1.371000e+03	1.069834e+04	4.111185e+02	8.567131e+01	2.374310e+02	1.687076e+02	4.283055e+02	2.811576e+02	9.700478e+01	5.855827e+01	1.198323e+02	1.451757e+02	8.138521e+01	1.198031e+02	5.601238e+01	9.503631e+01	2.073503e+01	1.173460e+02	1.042755e+02
1.372000e+03	1.102539e+04	1.623203e+02	-6.400334e+01	5.984463e+01	5.585019e+01	3.484711e+02	2.128279e+02	9.126203e+01	4.065524e+01	9.860093e+01	1.216159e+02	4.799374e+01	9.941547e+01	2.579265e+01	6.981452e+01	-5.651044e+01	1.054901e+02	9.554290e+01
1.373000e+03	1.123297e+04	-6.130009e+01	-2.045894e+02	-1.150099e+02	-5.275554e+01	2.646176e+02	1.466508e+02	7.922945e+01	1.874408e+01	6.732619e+01	9.080980e+01	6.840648e+00	7.284842e+01	-1.112182e+01	3.875628e+01	-1.321365e+02	9.038432e+01	8.215699e+01
1.374000e+03	1.132008e+04	-2.385016e+02	-3.239752e+02	-2.693801e+02	-1.465865e+02	1.848933e+02	9.011143e+01	6.131624e+01	-5.020123e+00	2.819807e+01	5.644266e+01	-3.813825e+01	4.313884e+01	-5.144355e+01	4.993374e+00	-1.994686e+02	7.399131e+01	6.553861e+01
1.375000e+03	1.129516e+04	-3.554556e+02	-4.131763e+02	-3.879982e+02	-2.169971e+02	1.170768e+02	4.938629e+01	3.880752e+01	-2.819274e+01	-1.534050e+01	2.272197e+01	-8.234054e+01	1.384550e+01	-9.121879e+01	-2.789855e+01	-2.528220e+02	5.834748e+01	4.751027e+01
1.376000e+03	1.117140e+04	-4.085272e+02	-4.678797e+02	-4.612720e+02	-2.588496e+02	6.680964e+01	2.799050e+01	1.365742e+01	-4.855469e+01	-5.916796e+01	-6.557953e+00	-1.213797e+02	-1.174252e+01	-1.265663e+02	-5.658819e+01	-2.883842e+02	4.511108e+01	2.998071e+01
1.377000e+03	1.096071e+04	-4.044036e+02	-4.887641e+02	-4.871354e+02	-2.714319e+02	3.624233e+01	2.592073e+01	-1.187367e+01	-6.450791e+01	-9.922747e+01	-2.882512e+01	-1.518613e+02	-3.132967e+01	-1.543679e+02	-7.862584e+01	-3.047535e+02	3.521191e+01	1.460170e+01
1.378000e+03	1.066853e+04	-3.575260e+02	-4.805927e+02	-4.709174e+02	-2.582925e+02	2.363816e+01	3.967996e+01	-3.561961e+01	-7.524994e+01	-1.322226e+02	-4.315891e+01	-1.718525e+02	-4.403316e+01	-1.727288e+02	-9.283876e+01	-3.029470e+02	2.871853e+01	2.492911e+00
1.379000e+03	1.029153e+04	-2.858406e+02	-4.505254e+02	-4.233292e+02	-2.260341e+02	2.412618e+01	6.325487e+01	-5.582578e+01	-8.072131e+01	-1.560705e+02	-5.022078e+01	-1.809655e+02	-5.036657e+01	-1.811132e+02	-9.937473e+01	-2.858851e+02	2.496118e+01	-5.888856e+00
1.380000e+03	9.819822e+03	-2.064533e+02	-4.063211e+02	-3.573765e+02	-1.825337e+02	3.132543e+01	8.972869e+01	-7.131074e+01	-8.140123e+01	-1.700155e+02	-5.175208e+01	-1.801055e+02	-5.182141e+01	-1.801765e+02	-9.941113e+01	-2.575661e+02	2.285337e+01	-1.070900e+01
1.381000e+03	9.243338e+03	-1.325854e+02	-3.549972e+02	-2.853392e+02	-1.352470e+02	3.921748e+01	1.129569e+02	-8.146991e+01	-7.806249e+01	-1.744345e+02	-4.985521e+01	-1.710265e+02	-5.022889e+01	-1.714016e+02	-9.466351e+01	-2.222447e+02	2.128499e+01	-1.257326e+01
1.382000e+03	8.560085e+03	-7.244468e+01	-3.021845e+02	-2.167589e+02	-9.011684e+01	4.359589e+01	1.287482e+02	-8.617524e+01	-7.157695e+01	-1.704595e+02	-4.632819e+01	-1.558605e+02	-4.715177e+01	-1.566853e+02	-8.688184e+01	-1.838614e+02	1.944718e+01	-1.227565e+01
1.383000e+03	7.783272e+03	-2.972643e+01	-2.520626e+02	-1.577931e+02	-5.124190e+01	4.267288e+01	1.352583e+02	-8.564470e+01	-6.281095e+01	-1.595765e+02	-4.226449e+01	-1.367420e+02	-4.351475e+01	-1.379932e+02	-7.749648e+01	-1.457955e+02	1.699458e+01	-1.055887e+01
1.384000e+03	6.944371e+03	-4.912123e+00	-2.075654e+02	-1.116693e+02	-2.109029e+01	3.681982e+01	1.326575e+02	-8.033831e+01	-5.259605e+01	-1.433254e+02	-3.799719e+01	-1.155824e+02	-3.956074e+01	-1.171466e+02	-6.749014e+01	-1.108394e+02	1.402641e+01	-7.952182e+00
1.385000e+03	6.090879e+03	3.472699e+00	-1.705725e+02	-7.961322e+01	-8.859059e-01	2.774851e+01	1.223936e+02	-7.090324e+01	-4.173149e+01	-1.231540e+02	-3.332824e+01	-9.398147e+01	-3.508280e+01	-9.573653e+01	-5.747328e+01	-8.122575e+01	1.093641e+01	-4.717742e+00
1.386000e+03	5.279463e+03	-1.914371e+00	-1.419626e+02	-6.165176e+01	9.125187e+00	1.756636e+01	1.064291e+02	-5.815835e+01	-3.097621e+01	-1.004129e+02	-2.789588e+01	-7.322992e+01	-2.978786e+01	-7.512228e+01	-4.787187e+01	-5.858902e+01	8.213760e+00	-8.984334e-01
1.387000e+03	4.566685e+03	-1.754525e+01	-1.215867e+02	-5.699770e+01	9.600724e+00	8.052794e+00	8.670968e+01	-4.309238e+01	-2.101083e+01	-7.643004e+01	-2.152032e+01	-5.434771e+01	-2.362909e+01	-5.645681e+01	-3.911758e+01	-4.385452e+01	6.269891e+00	3.568418e+00
1.388000e+03	3.999994e+03	-3.918021e+01	-1.083072e+02	-6.406860e+01	2.104070e+00	3.062848e-01	6.493545e+01	-2.684701e+01	-1.237594e+01	-5.258952e+01	-1.441215e+01	-3.811774e+01	-1.698712e+01	-4.069301e+01	-3.175455e+01	-3.713047e+01	5.333672e+00	8.721330e+00
1.389000e+03	3.611113e+03	-6.218529e+01	-1.002181e+02	-8.040282e+01	-1.099050e+01	-5.276278e+00	4.255355e+01	-1.066308e+01	-5.408781e+00	-3.034562e+01	-7.195922e+00	-2.509069e+01	-1.065293e+01	-2.854800e+01	-2.642296e+01	-3.769327e+01	5.422705e+00	1.447619e+01
1.390000e+03	3.412746e+03	-8.213184e+01	-9.506337e+01	-1.027367e+02	-2.678972e+01	-8.824583e+00	2.083406e+01	4.220429e+00	-2.027534e-01	-1.113316e+01	-7.640531e-01	-1.555582e+01	-5.635015e+00	-2.042712e+01	-2.372817e+01	-4.410810e+01	6.374413e+00	2.058930e+01
1.391000e+03	3.398362e+03	-9.556661e+01	-9.075071e+01	-1.273609e+02	-4.234759e+01	-1.076368e+01	9.166017e-01	1.670926e+01	3.393268e+00	3.825327e+00	3.980242e+00	-9.490280e+00	-2.862225e+00	-1.633313e+01	-2.404369e+01	-5.446559e+01	7.911500e+00	2.668721e+01
1.392000e+03	3.544152e+03	-1.006835e+02	-8.579760e+01	-1.506887e+02	-5.518743e+01	-1.161225e+01	-1.621999e+01	2.601323e+01	5.730572e+00	1.376566e+01	6.406297e+00	-6.516773e+00	-2.879430e+00	-1.580293e+01	-2.732192e+01	-6.667573e+01	9.717002e+00	3.234450e+01
1.393000e+03	3.812360e+03	-9.760987e+01	-7.955326e+01	-1.698448e+02	-6.372947e+01	-1.183597e+01	-2.984651e+01	3.178005e+01	7.276920e+00	1.859268e+01	6.372848e+00	-5.910410e+00	-5.636913e+00	-1.792065e+01	-3.299362e+01	-7.875588e+01	1.149943e+01	3.717647e+01
1.394000e+03	4.155768e+03	-8.813552e+01	-7.212161e+01	-1.830639e+02	-6.750207e+01	-1.174568e+01	-3.957307e+01	3.415712e+01	8.509481e+00	1.895803e+01	4.299078e+00	-6.689756e+00	-1.045263e+01	-2.144200e+01	-4.001745e+01	-8.906673e+01	1.303568e+01	4.091331e+01
1.395000e+03	4.523654e+03	-7.490499e+01	-6.401643e+01	-1.897686e+02	-6.707769e+01	-1.142258e+01	-4.537649e+01	3.375049e+01	9.809332e+00	1.614261e+01	1.051968e+00	-7.798849e+00	-1.617690e+01	-2.502828e+01	-4.709461e+01	-9.647086e+01	1.418768e+01	4.343568e+01
1.396000e+03	4.869405e+03	-6.028898e+01	-5.566838e+01	-1.903177e+02	-6.375006e+01	-1.066058e+01	-4.752714e+01	3.148476e+01	1.138803e+01	1.175518e+01	-2.323041e+00	-8.341973e+00	-2.151843e+01	-2.753795e+01	-5.299976e+01	-1.004013e+02	1.489701e+01	4.476958e+01
1.397000e+03	5.159052e+03	-4.528381e+01	-4.694887e+01	-1.855233e+02	-5.903859e+01	-8.926936e+00	-4.641940e+01	2.840463e+01	1.327343e+01	7.338378e+00	-4.934749e+00	-7.793337e+00	-2.542329e+01	-2.828247e+01	-5.692330e+01	-1.008336e+02	1.516711e+01	4.505385e+01
1.398000e+03	5.378711e+03	-2.883264e+01	-3.688152e+01	-1.760957e+02	-5.415938e+01	-5.353602e+00	-4.235569e+01	2.547947e+01	1.536421e+01	4.018831e+00	-6.314587e+00	-6.096974e+00	-2.736752e+01	-2.715048e+01	-5.870138e+01	-9.816476e+01	1.504322e+01	4.449782e+01
1.399000e+03	5.538101e+03	-7.910890e+00	-2.369388e+01	-1.621983e+02	-4.962797e+01	1.212275e+00	-3.537078e+01	2.346354e+01	1.753207e+01	2.318923e+00	-6.515691e+00	-3.613084e+00	-2.745402e+01	-2.455195e+01	-5.884305e+01	-9.302898e+01	1.459543e+01	4.334015e+01
1.400000e+03	5.667804e+03	2.143597e+01	-5.312913e+00	-1.433013e+02	-4.514816e+01	1.204998e+01	-2.519779e+01	2.283063e+01	1.971871e+01	2.170965e+00	-6.014121e+00	-9.414734e-01	-2.628848e+01	-2.121631e+01	-5.834242e+01	-8.611628e+01	1.390350e+01	4.180828e+01
1.401000e+03	5.809854e+03	6.218594e+01	1.970244e+01	-1.184950e+02	-3.988153e+01	2.824601e+01	-1.145774e+01	2.376355e+01	2.196388e+01	3.080879e+00	-5.477653e+00	1.280703e+00	-2.470885e+01	-1.795089e+01	-5.835085e+01	-7.808739e+01	1.303764e+01	4.007011e+01
1.402000e+03	6.003885e+03	1.140087e+02	5.098172e+01	-8.732114e+01	-3.308142e+01	5.019915e+01	5.913264e+00	2.615966e+01	2.432562e+01	4.330899e+00	-5.527589e+00	2.496338e+00	-2.350503e+01	-1.548143e+01	-5.984014e+01	-6.966104e+01	1.203064e+01	3.817381e+01
1.403000e+03	6.273223e+03	1.712872e+02	8.530950e+01	-5.096853e+01	-2.493054e+01	7.702523e+01	2.609173e+01	2.962621e+01	2.671291e+01	5.121387e+00	-6.609353e+00	2.207505e+00	-2.325484e+01	-1.443822e+01	-6.338195e+01	-6.187364e+01	1.084419e+01	3.598803e+01
1.404000e+03	6.615805e+03	2.224001e+02	1.162370e+02	-1.341996e+01	-1.729104e+01	1.060484e+02	4.685348e+01	3.347374e+01	2.871585e+01	4.620601e+00	-9.012289e+00	-1.379860e-01	-2.432331e+01	-1.544914e+01	-6.910452e+01	-5.640167e+01	9.343271e+00	3.317398e+01
1.405000e+03	7.003288e+03	2.509420e+02	1.347348e+02	1.802908e+01	-1.402561e+01	1.326344e+02	6.438026e+01	3.674833e+01	2.954967e+01	1.972444e+00	-1.298157e+01	-5.227054e+00	-2.697162e+01	-1.921715e+01	-7.679743e+01	-5.575095e+01	7.301418e+00	2.922931e+01
1.406000e+03	7.388783e+03	2.389779e+02	1.309565e+02	3.338235e+01	-2.062533e+01	1.505850e+02	7.359933e+01	3.834936e+01	2.819813e+01	-3.646134e+00	-1.880326e+01	-1.379837e+01	-3.145649e+01	-2.645153e+01	-8.606514e+01	-6.311581e+01	4.458556e+00	2.362861e+01
1.407000e+03	7.720491e+03	1.716744e+02	9.674992e+01	2.183155e+01	-4.308300e+01	1.531643e+02	6.911218e+01	3.725028e+01	2.375380e+01	-1.285040e+01	-2.675460e+01	-2.634804e+01	-3.800828e+01	-3.760152e+01	-9.641571e+01	-8.181375e+01	6.390850e-01	1.604741e+01
1.408000e+03	7.956515e+03	4.203154e+01	2.819646e+01	-2.544457e+01	-8.621867e+01	1.346035e+02	4.654995e+01	3.278885e+01	1.584922e+01	-2.576359e+01	-3.689126e+01	-4.270451e+01	-4.665288e+01	-5.246578e+01	-1.072202e+02	-1.143723e+02	-4.088897e+00	6.610230e+00
1.409000e+03	8.076013e+03	-1.457892e+02	-7.264765e+01	-1.123809e+02	-1.519040e+02	9.172593e+01	3.997591e+00	2.494601e+01	5.006309e+00	-4.171568e+01	-4.874876e+01	-6.165675e+01	-5.694431e+01	-6.985181e+01	-1.175643e+02	-1.615148e+02	-9.261484e+00	-3.928607e+00
1.410000e+03	8.083567e+03	-3.757776e+02	-1.974534e+02	-2.360080e+02	-2.377530e+02	2.521934e+01	-5.696577e+01	1.451203e+01	-7.258902e+00	-5.906773e+01	-6.111145e+01	-8.084005e+01	-6.775074e+01	-8.747873e+01	-1.260964e+02	-2.213900e+02	-1.394108e+01	-1.416037e+01
1.411000e+03	8.006267e+03	-6.225537e+02	-3.329890e+02	-3.861089e+02	-3.367954e+02	-5.989464e+01	-1.310131e+02	3.055310e+00	-1.865639e+01	-7.529518e+01	-7.201021e+01	-9.700824e+01	-7.724662e+01	-1.022439e+02	-1.310143e+02	-2.893754e+02	-1.677670e+01	-2.220285e+01
1.412000e+03	7.885396e+03	-8.565883e+02	-4.638694e+02	-5.468588e+02	-4.384155e+02	-1.548684e+02	-2.098126e+02	-7.342516e+00	-2.662799e+01	-8.739713e+01	-7.904271e+01	-1.066839e+02	-8.320321e+01	-1.108437e+02	-1.303042e+02	-3.586508e+02	-1.623664e+01	-2.607286e+01
1.413000e+03	7.765795e+03	-1.050829e+03	-5.759420e+02	-7.001205e+02	-5.304679e+02	-2.488935e+02	-2.836857e+02	-1.455410e+01	-2.899682e+01	-9.259340e+01	-7.999099e+01	-1.070373e+02	-8.355930e+01	-1.106049e+02	-1.222521e+02	-4.215049e+02	-1.099470e+01	-2.417327e+01
1.414000e+03	7.685828e+03	-1.186822e+03	-6.593271e+02	-8.295009e+02	-6.020690e+02	-3.314532e+02	-3.437879e+02	-1.697524e+01	-2.456871e+01	-8.915545e+01	-7.358265e+01	-9.675000e+01	-7.713233e+01	-1.002990e+02	-1.061223e+02	-4.710782e+02	-3.889538e-01	-1.577389e+01
1.415000e+03	7.669822e+03	-1.258444e+03	-7.101901e+02	-9.239568e+02	-6.462572e+02	-3.947026e+02	-3.841907e+02	-1.403946e+01	-1.350983e+01	-7.712587e+01	-6.014820e+01	-7.659718e+01	-6.423928e+01	-8.068763e+01	-8.277576e+01	-5.030329e+02	1.518095e+01	-1.353265e+00
1.416000e+03	7.723840e+03	-1.272034e+03	-7.307185e+02	-9.798193e+02	-6.616522e+02	-4.351190e+02	-4.032053e+02	-6.505635e+00	2.610669e+00	-5.865413e+01	-4.190981e+01	-4.953858e+01	-4.697520e+01	-5.460340e+01	-5.495856e+01	-5.165874e+02	3.406992e+01	1.731286e+01
1.417000e+03	7.835108e+03	-1.242928e+03	-7.273777e+02	-1.000597e+03	-6.525083e+02	-4.538443e+02	-4.034838e+02	3.614038e+00	2.113297e+01	-3.774670e+01	-2.271673e+01	-2.022832e+01	-2.896965e+01	-2.648071e+01	-2.704434e+01	-5.145148e+02	5.353349e+01	3.737977e+01
1.418000e+03	7.975296e+03	-1.189669e+03	-7.081396e+02	-9.946825e+02	-6.270881e+02	-4.555889e+02	-3.908326e+02	1.351678e+01	3.890037e+01	-1.940243e+01	-7.214219e+00	5.980850e+00	-1.460260e+01	-1.406972e+00	-4.190833e+00	-5.020508e+02	7.022743e+01	5.546512e+01
1.419000e+03	8.107540e+03	-1.128069e+03	-6.797538e+02	-9.718534e+02	-5.949086e+02	-4.465153e+02	-3.721418e+02	2.035552e+01	5.298306e+01	-8.331671e+00	3.553605e-01	2.429579e+01	-7.865814e+00	1.607526e+01	8.902127e+00	-4.850725e+02	8.095933e+01	6.837681e+01
1.420000e+03	8.196210e+03	-1.067299e+03	-6.460895e+02	-9.399081e+02	-5.638588e+02	-4.319425e+02	-3.531836e+02	2.203984e+01	6.133639e+01	-7.650624e+00	-2.649610e+00	3.164606e+01	-1.122288e+01	2.307355e+01	9.252228e+00	-4.682181e+02	8.347923e+01	7.385033e+01
1.421000e+03	8.217118e+03	-1.009352e+03	-6.081002e+02	-9.027154e+02	-5.382579e+02	-4.147873e+02	-3.370944e+02	1.781848e+01	6.320635e+01	-1.799891e+01	-1.648516e+01	2.738924e+01	-2.486604e+01	1.900928e+01	-3.565502e+00	-4.536620e+02	7.705483e+01	7.107599e+01
1.422000e+03	8.164977e+03	-9.516794e+02	-5.652351e+02	-8.603452e+02	-5.185364e+02	-3.953232e+02	-3.240768e+02	8.437942e+00	5.916437e+01	-3.740020e+01	-3.893557e+01	1.332658e+01	-4.664770e+01	5.615538e+00	-2.731049e+01	-4.409991e+02	6.263398e+01	6.084307e+01
1.423000e+03	8.055221e+03	-8.913743e+02	-5.174395e+02	-8.110289e+02	-5.025043e+02	-3.722197e+02	-3.123227e+02	-4.166349e+00	5.077287e+01	-6.190659e+01	-6.595176e+01	-6.967081e+00	-7.271136e+01	-1.372546e+01	-5.774076e+01	-4.282081e+02	4.254211e+01	4.525130e+01
1.424000e+03	7.919116e+03	-8.285176e+02	-4.665953e+02	-7.538414e+02	-4.874445e+02	-3.442111e+02	-2.996066e+02	-1.750306e+01	4.001412e+01	-8.675673e+01	-9.275338e+01	-2.923943e+01	-9.856498e+01	-3.504973e+01	-8.978635e+01	-4.131628e+02	1.983687e+01	2.709946e+01
1.425000e+03	7.793605e+03	-7.667568e+02	-4.165155e+02	-6.906136e+02	-4.718724e+02	-3.114446e+02	-2.846854e+02	-2.921511e+01	2.870432e+01	-1.075800e+02	-1.149547e+02	-4.966071e+01	-1.201619e+02	-5.486655e+01	-1.187709e+02	-3.948983e+02	-2.430002e+00	9.185246e+00
1.426000e+03	7.709482e+03	-7.106874e+02	-3.713560e+02	-6.259236e+02	-4.559887e+02	-2.757502e+02	-2.677623e+02	-3.756019e+01	1.811645e+01	-1.211945e+02	-1.292954e+02	-6.551841e+01	-1.345750e+02	-7.079675e+01	-1.412265e+02	-3.739538e+02	-2.177438e+01	-6.224360e+00
1.427000e+03	7.682136e+03	-6.614646e+02	-3.332001e+02	-5.649807e+02	-4.405733e+02	-2.396736e+02	-2.497901e+02	-4.153975e+01	8.938829e+00	-1.257740e+02	-1.337768e+02	-7.529631e+01	-1.400699e+02	-8.158847e+01	-1.550600e+02	-3.516072e+02	-3.649628e+01	-1.758760e+01
1.428000e+03	7.708024e+03	-6.133054e+02	-3.001481e+02	-5.104022e+02	-4.249884e+02	-2.048325e+02	-2.310633e+02	-4.072025e+01	1.535856e+00	-1.204842e+02	-1.273206e+02	-7.822936e+01	-1.357019e+02	-8.660990e+01	-1.591586e+02	-3.284422e+02	-4.555820e+01	-2.395626e+01
1.429000e+03	7.767673e+03	-5.534005e+02	-2.661570e+02	-4.596643e+02	-4.055829e+02	-1.705941e+02	-2.100185e+02	-3.494186e+01	-3.671893e+00	-1.049569e+02	-1.093150e+02	-7.368839e+01	-1.208126e+02	-8.518575e+01	-1.527998e+02	-3.031351e+02	-4.829775e+01	-2.469302e+01
1.430000e+03	7.833515e+03	-4.661744e+02	-2.231044e+02	-4.049129e+02	-3.757413e+02	-1.339792e+02	-1.831370e+02	-2.414717e+01	-5.954657e+00	-7.902412e+01	-7.945466e+01	-6.083315e+01	-9.485350e+01	-7.623217e+01	-1.353213e+02	-2.723260e+02	-4.421772e+01	-1.928198e+01
1.431000e+03	7.879201e+03	-3.405298e+02	-1.644246e+02	-3.357772e+02	-3.280389e+02	-9.108060e+01	-1.462985e+02	-8.466915e+00	-4.330561e+00	-4.295523e+01	-3.808705e+01	-3.882032e+01	-5.775620e+01	-5.849011e+01	-1.063404e+02	-2.319275e+02	-3.303344e+01	-7.406169e+00
1.432000e+03	7.886906e+03	-1.768858e+02	-8.876855e+01	-2.442965e+02	-2.578230e+02	-3.945054e+01	-9.711891e+01	1.147706e+01	2.049533e+00	1.899527e+00	1.307343e+01	-7.529156e+00	-1.071788e+01	-3.132157e+01	-6.647144e+01	-1.794357e+02	-1.498810e+01	1.071031e+01
1.433000e+03	7.850312e+03	9.519406e+00	-1.945014e+00	-1.298219e+02	-1.666185e+02	1.969491e+01	-3.715866e+01	3.424992e+01	1.335747e+01	5.245538e+01	7.029505e+01	3.156219e+01	4.304595e+01	4.311553e+00	-1.814882e+01	-1.161702e+02	8.738017e+00	3.388526e+01
1.434000e+03	7.772918e+03	1.911458e+02	8.392929e+01	-1.496805e+00	-6.358361e+01	8.064105e+01	2.721816e+01	5.750951e+01	2.865899e+01	1.037190e+02	1.277492e+02	7.486819e+01	9.811401e+01	4.523115e+01	3.398191e+01	-4.823197e+01	3.579543e+01	5.976555e+01
1.435000e+03	7.663155e+03	3.360108e+02	1.539332e+02	1.231445e+02	3.602473e+01	1.343095e+02	8.601293e+01	7.829105e+01	4.584510e+01	1.493964e+02	1.782882e+02	1.169507e+02	1.475543e+02	8.621461e+01	8.349468e+01	1.453414e+01	6.282976e+01	8.503249e+01
1.436000e+03	7.528897e+03	4.179848e+02	1.951876e+02	2.232093e+02	1.151059e+02	1.710425e+02	1.285355e+02	9.363495e+01	6.201300e+01	1.832114e+02	2.149615e+02	1.515902e+02	1.844045e+02	1.210307e+02	1.234478e+02	6.138590e+01	8.608270e+01	1.060486e+02
1.437000e+03	7.373952e+03	4.255227e+02	2.011764e+02	2.812206e+02	1.601598e+02	1.839317e+02	1.470083e+02	1.013445e+02	7.418726e+01	2.005010e+02	2.327725e+02	1.733448e+02	2.034473e+02	1.440169e+02	1.480885e+02	8.428854e+01	1.022582e+02	1.197525e+02
1.438000e+03	7.198164e+03	3.655388e+02	1.739476e+02	2.889841e+02	1.658085e+02	1.713369e+02	1.393740e+02	1.005881e+02	8.012745e+01	1.994975e+02	2.300320e+02	1.790380e+02	2.026265e+02	1.516298e+02	1.543789e+02	8.083670e+01	1.093482e+02	1.244797e+02
1.439000e+03	7.001096e+03	2.612013e+02	1.235202e+02	2.503410e+02	1.366557e+02	1.376172e+02	1.101830e+02	9.212375e+01	7.893967e+01	1.818259e+02	2.088136e+02	1.686431e+02	1.835890e+02	1.434159e+02	1.427877e+02	5.532446e+01	1.071196e+02	1.204052e+02
1.440000e+03	6.787522e+03	1.447833e+02	6.488728e+01	1.799461e+02	8.584644e+01	9.188017e+01	6.925397e+01	7.807674e+01	7.129210e+01	1.520539e+02	1.743680e+02	1.452705e+02	1.511871e+02	1.220870e+02	1.170879e+02	1.757117e+01	9.709788e+01	1.094493e+02
1.441000e+03	6.571780e+03	4.831645e+01	1.377185e+01	9.875968e+01	3.098599e+01	4.533263e+01	2.868727e+01	6.136217e+01	5.917843e+01	1.164694e+02	1.337231e+02	1.142867e+02	1.121492e+02	9.271041e+01	8.326665e+01	-2.000004e+01	8.206797e+01	9.468614e+01
1.442000e+03	6.378051e+03	-4.870600e+00	-1.749959e+01	2.800277e+01	-1.103580e+01	8.235624e+00	-6.339847e-01	4.494272e+01	4.531701e+01	8.148665e+01	9.392872e+01	8.186173e+01	7.336863e+01	6.129956e+01	4.792737e+01	-4.593585e+01	6.526962e+01	7.945649e+01
1.443000e+03	6.235148e+03	-5.424286e+00	-2.289759e+01	-1.642833e+01	-2.857619e+01	-1.256765e+01	-1.188423e+01	3.113513e+01	3.237610e+01	5.214197e+01	6.045551e+01	5.338345e+01	4.031510e+01	3.324128e+01	1.667544e+01	-5.278426e+01	4.954371e+01	6.646999e+01
1.444000e+03	6.166881e+03	4.092308e+01	-3.773891e+00	-2.756930e+01	-1.785511e+01	-1.495868e+01	-3.703482e+00	2.113988e+01	2.225930e+01	3.106730e+01	3.614983e+01	3.218700e+01	1.597304e+01	1.200876e+01	-7.070373e+00	-3.873818e+01	3.667842e+01	5.716330e+01
1.445000e+03	6.181531e+03	1.160792e+02	3.192438e+01	-8.325952e+00	1.681830e+01	-1.558001e+00	2.001684e+01	1.489698e+01	1.566427e+01	1.817401e+01	2.096142e+01	1.894142e+01	5.289160e-01	-1.492228e+00	-2.255849e+01	-7.614259e+00	2.712804e+01	5.148979e+01
1.446000e+03	6.265095e+03	1.949185e+02	7.192446e+01	3.012144e+01	6.490016e+01	2.131766e+01	5.164497e+01	1.128221e+01	1.204386e+01	1.107721e+01	1.244137e+01	1.183889e+01	-8.186457e+00	-8.789804e+00	-3.141278e+01	3.257313e+01	2.015518e+01	4.817192e+01
1.447000e+03	6.381983e+03	2.515492e+02	1.027002e+02	7.170809e+01	1.127185e+02	4.533534e+01	8.199415e+01	8.564272e+00	9.967051e+00	6.081641e+00	6.797820e+00	7.484405e+00	-1.370249e+01	-1.301653e+01	-3.673649e+01	7.184091e+01	1.431068e+01	4.529575e+01
1.448000e+03	6.484007e+03	2.648931e+02	1.125380e+02	9.960991e+01	1.468241e+02	6.200744e+01	1.025078e+02	4.966424e+00	7.738085e+00	-6.165672e-01	1.428528e-01	2.155084e+00	-1.971547e+01	-1.770364e+01	-4.196061e+01	1.005686e+02	8.056445e+00	4.101647e+01
1.449000e+03	6.524993e+03	2.223709e+02	9.385947e+01	1.000104e+02	1.567056e+02	6.433629e+01	1.069098e+02	-8.520516e-01	4.039793e+00	-1.191234e+01	-1.047544e+01	-7.020486e+00	-2.909310e+01	-2.563834e+01	-4.984641e+01	1.113415e+02	2.987353e-01	3.411980e+01
1.450000e+03	6.475825e+03	1.211746e+02	4.433940e+01	6.464811e+01	1.363387e+02	4.795390e+01	9.203565e+01	-9.537645e+00	-1.634124e+00	-2.926035e+01	-2.655328e+01	-2.135680e+01	-4.336841e+01	-3.817192e+01	-6.195428e+01	9.996585e+01	-9.346806e+00	2.426205e+01
1.451000e+03	6.334241e+03	-3.263075e+01	-3.324236e+01	-8.268795e+00	8.447557e+01	1.162007e+01	5.784112e+01	-2.105174e+01	-8.899098e+00	-5.271245e+01	-4.819790e+01	-4.055977e+01	-6.279571e+01	-5.515733e+01	-7.866836e+01	6.561545e+01	-2.061111e+01	1.185852e+01
1.452000e+03	6.125707e+03	-2.263631e+02	-1.320973e+02	-1.146642e+02	3.978697e+00	-4.289127e+01	6.812293e+00	-3.488004e+01	-1.674638e+01	-8.136592e+01	-7.461236e+01	-6.323223e+01	-8.680436e+01	-7.542370e+01	-9.962112e+01	1.033388e+01	-3.286291e+01	-2.262186e+00
1.453000e+03	5.895008e+03	-4.433368e+02	-2.429476e+02	-2.461589e+02	-9.928508e+01	-1.113473e+02	-5.687758e+01	-5.030595e+01	-2.401673e+01	-1.139193e+02	-1.046822e+02	-8.763008e+01	-1.145418e+02	-9.748882e+01	-1.242105e+02	-6.174699e+01	-4.546219e+01	-1.724091e+01
1.454000e+03	5.691691e+03	-6.650682e+02	-3.554787e+02	-3.918784e+02	-2.174956e+02	-1.878183e+02	-1.281390e+02	-6.661290e+01	-2.987514e+01	-1.490454e+02	-1.373579e+02	-1.123076e+02	-1.452088e+02	-1.201572e+02	-1.519094e+02	-1.451311e+02	-5.800211e+01	-3.243012e+01
1.455000e+03	5.554528e+03	-8.728160e+02	-4.594591e+02	-5.399242e+02	-3.416093e+02	-2.654434e+02	-2.014754e+02	-8.314245e+01	-3.410060e+01	-1.854382e+02	-1.716776e+02	-1.363964e+02	-1.780391e+02	-1.427563e+02	-1.822160e+02	-2.334435e+02	-7.034102e+01	-4.741550e+01
1.456000e+03	5.500281e+03	-1.048708e+03	-5.455447e+02	-6.782987e+02	-4.618067e+02	-3.371067e+02	-2.712325e+02	-9.921937e+01	-3.709344e+01	-2.215853e+02	-2.064774e+02	-1.594595e+02	-2.119803e+02	-1.649603e+02	-2.142956e+02	-3.197108e+02	-8.243378e+01	-6.185564e+01
1.457000e+03	5.520208e+03	-1.176982e+03	-6.059793e+02	-7.954738e+02	-5.679329e+02	-3.960491e+02	-3.317573e+02	-1.140203e+02	-3.961887e+01	-2.554631e+02	-2.400051e+02	-1.810619e+02	-2.452914e+02	-1.863456e+02	-2.465310e+02	-3.966420e+02	-9.406191e+01	-7.526118e+01
1.458000e+03	5.584913e+03	-1.245797e+03	-6.354262e+02	-8.810380e+02	-6.502589e+02	-4.365133e+02	-3.777037e+02	-1.264870e+02	-4.240769e+01	-2.843923e+02	-2.697017e+02	-2.003134e+02	-2.753309e+02	-2.059396e+02	-2.762574e+02	-4.571577e+02	-1.046030e+02	-8.685026e+01
1.459000e+03	5.655328e+03	-1.249661e+03	-6.320022e+02	-9.268274e+02	-7.007476e+02	-4.544978e+02	-4.046646e+02	-1.353646e+02	-4.578916e+01	-3.052268e+02	-2.923577e+02	-2.156519e+02	-2.987360e+02	-2.220269e+02	-2.999007e+02	-4.953103e+02	-1.129631e+02	-9.556973e+01
1.460000e+03	5.695826e+03	-1.191962e+03	-5.983221e+02	-9.286454e+02	-7.147263e+02	-4.485852e+02	-4.101313e+02	-1.393960e+02	-4.951788e+01	-3.149088e+02	-3.046946e+02	-2.250314e+02	-3.120420e+02	-2.323754e+02	-3.135877e+02	-5.075232e+02	-1.177338e+02	-1.002930e+02
1.461000e+03	5.685226e+03	-1.086598e+03	-5.420990e+02	-8.882198e+02	-6.925584e+02	-4.206664e+02	-3.945587e+02	-1.376357e+02	-5.287746e+01	-3.112669e+02	-3.042445e+02	-2.265097e+02	-3.126038e+02	-2.348655e+02	-3.141137e+02	-4.938395e+02	-1.175515e+02	-1.001310e+02
1.462000e+03	5.622572e+03	-9.575428e+02	-4.757435e+02	-8.146262e+02	-6.407052e+02	-3.762533e+02	-3.621266e+02	-1.297898e+02	-5.502371e+01	-2.938101e+02	-2.902508e+02	-2.190453e+02	-2.995331e+02	-2.283241e+02	-2.999879e+02	-4.587127e+02	-1.115556e+02	-9.474950e+01
1.463000e+03	5.526576e+03	-8.355319e+02	-4.145739e+02	-7.242407e+02	-5.715626e+02	-3.240621e+02	-3.207403e+02	-1.164527e+02	-5.541719e+01	-2.642221e+02	-2.642562e+02	-2.031881e+02	-2.743062e+02	-2.132347e+02	-2.722010e+02	-4.108821e+02	-9.979333e+01	-8.458589e+01
1.464000e+03	5.429545e+03	-7.520209e+02	-3.737218e+02	-6.385468e+02	-5.017142e+02	-2.746867e+02	-2.809676e+02	-9.912686e+01	-5.414110e+01	-2.263186e+02	-2.301016e+02	-1.813345e+02	-2.407621e+02	-1.919918e+02	-2.343981e+02	-3.620803e+02	-8.341984e+01	-7.088660e+01
1.465000e+03	5.367987e+03	-7.317951e+02	-3.644570e+02	-5.798309e+02	-4.487335e+02	-2.384898e+02	-2.539548e+02	-7.997323e+01	-5.194065e+01	-1.853833e+02	-1.932366e+02	-1.573525e+02	-2.043925e+02	-1.685054e+02	-1.923079e+02	-3.246989e+02	-6.459684e+01	-5.554075e+01
1.466000e+03	5.372670e+03	-7.866250e+02	-3.911626e+02	-5.657599e+02	-4.272648e+02	-2.232196e+02	-2.488109e+02	-6.134085e+01	-4.994393e+01	-1.470180e+02	-1.594807e+02	-1.356230e+02	-1.710725e+02	-1.472119e+02	-1.525238e+02	-3.089678e+02	-4.609189e+01	-4.074066e+01
1.467000e+03	5.460727e+03	-9.124880e+02	-4.502391e+02	-6.046170e+02	-4.455721e+02	-2.321405e+02	-2.702941e+02	-4.522121e+01	-4.917977e+01	-1.158419e+02	-1.336014e+02	-1.198025e+02	-1.456069e+02	-1.318053e+02	-1.209759e+02	-3.205146e+02	-3.068419e+01	-2.855214e+01
1.468000e+03	5.631741e+03	-1.091791e+03	-5.316134e+02	-6.931074e+02	-5.037900e+02	-2.634483e+02	-3.176848e+02	-3.281773e+01	-5.011658e+01	-9.446603e+01	-1.181792e+02	-1.117670e+02	-1.305775e+02	-1.241626e+02	-1.015666e+02	-3.591749e+02	-2.055641e+01	-2.050899e+01
1.469000e+03	5.868636e+03	-1.300008e+03	-6.224662e+02	-8.178726e+02	-5.946008e+02	-3.113328e+02	-3.853656e+02	-2.438565e+01	-5.244847e+01	-8.309415e+01	-1.131575e+02	-1.111591e+02	-1.258917e+02	-1.238906e+02	-9.541169e+01	-4.195426e+02	-1.685837e+01	-1.734499e+01
1.470000e+03	6.142890e+03	-1.514113e+03	-7.117330e+02	-9.603761e+02	-7.061217e+02	-3.683697e+02	-4.649603e+02	-1.938931e+01	-5.524321e+01	-7.987478e+01	-1.162294e+02	-1.157308e+02	-1.291895e+02	-1.286881e+02	-1.009111e+02	-4.930862e+02	-1.956473e+01	-1.893663e+01
1.471000e+03	6.422399e+03	-1.719227e+03	-7.934863e+02	-1.103299e+03	-8.258304e+02	-4.282866e+02	-5.481856e+02	-1.689148e+01	-5.739283e+01	-8.183952e+01	-1.238981e+02	-1.223428e+02	-1.369346e+02	-1.353765e+02	-1.145753e+02	-5.709945e+02	-2.763971e+01	-2.445915e+01
1.472000e+03	6.679573e+03	-1.910670e+03	-8.677515e+02	-1.235812e+03	-9.438827e+02	-4.879129e+02	-6.292251e+02	-1.599787e+01	-5.815971e+01	-8.604578e+01	-1.327920e+02	-1.282094e+02	-1.457611e+02	-1.411756e+02	-1.322612e+02	-6.465939e+02	-3.941455e+01	-3.268437e+01
1.473000e+03	6.897435e+03	-2.090786e+03	-9.385050e+02	-1.355553e+03	-1.054487e+03	-5.474606e+02	-7.056402e+02	-1.617248e+01	-5.756233e+01	-9.049213e+01	-1.407435e+02	-1.318835e+02	-1.535681e+02	-1.447052e+02	-1.503563e+02	-7.163922e+02	-5.302182e+01	-4.230223e+01
1.474000e+03	7.072345e+03	-2.262459e+03	-1.009929e+03	-1.466659e+03	-1.154979e+03	-6.090685e+02	-7.775337e+02	-1.731364e+01	-5.641681e+01	-9.450439e+01	-1.472613e+02	-1.336088e+02	-1.599854e+02	-1.463301e+02	-1.665168e+02	-7.794820e+02	-6.673497e+01	-5.214969e+01
1.475000e+03	7.213203e+03	-2.422759e+03	-1.082773e+03	-1.575060e+03	-1.243402e+03	-6.743721e+02	-8.455235e+02	-1.959381e+01	-5.600562e+01	-9.852798e+01	-1.532891e+02	-1.349408e+02	-1.661009e+02	-1.477501e+02	-1.797805e+02	-8.358252e+02	-7.912258e+01	-6.127962e+01
1.476000e+03	7.337934e+03	-2.559950e+03	-1.152518e+03	-1.683410e+03	-1.316089e+03	-7.423037e+02	-9.086322e+02	-2.316378e+01	-5.750869e+01	-1.034944e+02	-1.604132e+02	-1.378399e+02	-1.736255e+02	-1.510501e+02	-1.901303e+02	-8.844436e+02	-8.901682e+01	-6.887912e+01
1.477000e+03	7.468421e+03	-2.655287e+03	-1.210074e+03	-1.788035e+03	-1.366686e+03	-8.081721e+02	-9.631872e+02	-2.786723e+01	-6.143505e+01	-1.100695e+02	-1.698773e+02	-1.436377e+02	-1.838654e+02	-1.576243e+02	-1.977875e+02	-9.224937e+02	-9.537907e+01	-7.412007e+01
1.478000e+03	7.624885e+03	-2.688681e+03	-1.244500e+03	-1.879109e+03	-1.387202e+03	-8.644157e+02	-1.003273e+03	-3.309675e+01	-6.729631e+01	-1.181036e+02	-1.818029e+02	-1.523033e+02	-1.969202e+02	-1.674196e+02	-2.025906e+02	-9.456650e+02	-9.719287e+01	-7.606461e+01
1.479000e+03	7.820398e+03	-2.645571e+03	-1.246435e+03	-1.943650e+03	-1.370605e+03	-9.026466e+02	-1.022508e+03	-3.786138e+01	-7.366869e+01	-1.264965e+02	-1.949215e+02	-1.623037e+02	-2.114160e+02	-1.787979e+02	-2.037509e+02	-9.496270e+02	-9.350350e+01	-7.373390e+01
1.480000e+03	8.056133e+03	-2.521997e+03	-1.210743e+03	-1.969726e+03	-1.313711e+03	-9.160798e+02	-1.016300e+03	-4.105089e+01	-7.863439e+01	-1.335192e+02	-2.069139e+02	-1.711022e+02	-2.248708e+02	-1.890596e+02	-2.000932e+02	-9.317427e+02	-8.365092e+01	-6.637483e+01
1.481000e+03	8.318196e+03	-2.325939e+03	-1.137476e+03	-1.949950e+03	-1.218990e+03	-9.013870e+02	-9.835844e+02	-4.179900e+01	-8.043521e+01	-1.374366e+02	-2.152090e+02	-1.760721e+02	-2.345319e+02	-1.953961e+02	-1.906600e+02	-8.922024e+02	-6.763062e+01	-5.385042e+01
1.482000e+03	8.577223e+03	-2.074642e+03	-1.031052e+03	-1.882931e+03	-1.094487e+03	-8.593573e+02	-9.273221e+02	-3.979652e+01	-7.807419e+01	-1.371516e+02	-2.179002e+02	-1.754282e+02	-2.383317e+02	-1.958614e+02	-1.753681e+02	-8.340866e+02	-4.641627e+01	-3.698359e+01
1.483000e+03	8.791850e+03	-1.789302e+03	-8.982716e+02	-1.772466e+03	-9.518930e+02	-7.942788e+02	-8.536115e+02	-3.541270e+01	-7.161429e+01	-1.325701e+02	-2.143845e+02	-1.687701e+02	-2.355558e+02	-1.899436e+02	-1.553679e+02	-7.624004e+02	-2.204850e+01	-1.765849e+01
1.484000e+03	8.916478e+03	-1.489262e+03	-7.460944e+02	-1.625168e+03	-8.035689e+02	-7.124046e+02	-7.698331e+02	-2.955722e+01	-6.205013e+01	-1.245198e+02	-2.054526e+02	-1.570108e+02	-2.269481e+02	-1.785087e+02	-1.328861e+02	-6.825605e+02	2.630965e+00	1.440994e+00
1.485000e+03	8.912310e+03	-1.187860e+03	-5.800547e+02	-1.447784e+03	-6.596493e+02	-6.201242e+02	-6.825786e+02	-2.332961e+01	-5.081980e+01	-1.142685e+02	-1.928141e+02	-1.417565e+02	-2.142372e+02	-1.631823e+02	-1.105868e+02	-5.989817e+02	2.456639e+01	1.742190e+01
1.486000e+03	8.759038e+03	-8.912206e+02	-4.038340e+02	-1.245365e+03	-5.262183e+02	-5.224748e+02	-5.961395e+02	-1.760300e+01	-3.918884e+01	-1.028822e+02	-1.782996e+02	-1.244656e+02	-1.993315e+02	-1.455001e+02	-9.072928e+01	-5.142860e+02	4.120522e+01	2.790954e+01
1.487000e+03	8.463503e+03	-6.001446e+02	-2.200574e+02	-1.020985e+03	-4.050413e+02	-4.224568e+02	-5.120552e+02	-1.272034e+01	-2.779579e+01	-9.073616e+01	-1.631201e+02	-1.058091e+02	-1.835641e+02	-1.262556e+02	-7.449834e+01	-4.293503e+02	5.107969e+01	3.163996e+01
1.488000e+03	8.061954e+03	-3.141460e+02	-3.193346e+01	-7.770377e+02	-2.947443e+02	-3.213201e+02	-4.297902e+02	-8.427576e+00	-1.656793e+01	-7.740668e+01	-1.475101e+02	-8.554458e+01	-1.673168e+02	-1.053535e+02	-6.179455e+01	-3.440728e+02	5.403461e+01	2.868898e+01
1.489000e+03	7.614276e+03	-3.605137e+01	1.549419e+02	-5.174982e+02	-1.928647e+02	-2.196483e+02	-3.481945e+02	-4.060865e+00	-5.042344e+00	-6.198045e+01	-1.308927e+02	-6.295965e+01	-1.501592e+02	-8.222794e+01	-5.155979e+01	-2.584989e+02	5.102242e+01	2.025037e+01
1.490000e+03	7.191358e+03	2.244807e+02	3.313715e+02	-2.501907e+02	-9.802997e+01	-1.187967e+02	-2.671629e+02	1.096067e+00	7.053622e+00	-4.364491e+01	-1.124732e+02	-3.768535e+01	-1.314128e+02	-5.662633e+01	-4.249965e+01	-1.738826e+02	4.354287e+01	8.042559e+00
1.491000e+03	6.859318e+03	4.496653e+02	4.845081e+02	1.188066e+01	-1.164053e+01	-2.212574e+01	-1.889148e+02	7.418754e+00	1.921618e+01	-2.233082e+01	-9.201772e+01	-1.053170e+01	-1.109016e+02	-2.941661e+01	-3.394279e+01	-9.335709e+01	3.291307e+01	-6.454719e+00
1.492000e+03	6.665484e+03	6.149586e+02	5.991813e+02	2.507447e+02	6.128894e+01	6.444065e+01	-1.185202e+02	1.463897e+01	2.982759e+01	8.091903e-01	-7.052217e+01	1.599917e+01	-8.960312e+01	-3.082564e+00	-2.656160e+01	-2.206242e+01	1.959108e+01	-2.268785e+01
1.493000e+03	6.630190e+03	6.928672e+02	6.604059e+02	4.453138e+02	1.122398e+02	1.327716e+02	-6.356113e+01	2.171733e+01	3.623057e+01	2.323739e+01	-5.052658e+01	3.775170e+01	-6.996166e+01	1.831594e+01	-2.272394e+01	3.326835e+01	2.761497e+00	-4.141921e+01
1.494000e+03	6.746103e+03	6.585205e+02	6.565359e+02	5.745289e+02	1.302605e+02	1.737675e+02	-3.301164e+01	2.693280e+01	3.523722e+01	4.126370e+01	-3.592337e+01	4.956895e+01	-5.571455e+01	2.977704e+01	-2.631372e+01	6.520507e+01	-1.965735e+01	-6.467031e+01
1.495000e+03	6.984052e+03	4.959628e+02	5.823370e+02	6.212003e+02	1.039787e+02	1.792206e+02	-3.552917e+01	2.819224e+01	2.394908e+01	5.068909e+01	-3.123174e+01	4.644660e+01	-5.120057e+01	2.647683e+01	-4.195200e+01	6.693307e+01	-5.050962e+01	-9.517792e+01
1.496000e+03	7.302720e+03	2.037656e+02	4.411920e+02	5.758388e+02	2.440035e+01	1.438955e+02	-7.742417e+01	2.352258e+01	6.550881e-01	4.779224e+01	-4.045053e+01	2.492534e+01	-6.025574e+01	5.118814e+00	-7.369844e+01	3.386667e+01	-9.246002e+01	-1.354633e+02
1.497000e+03	7.659396e+03	-2.017042e+02	2.457518e+02	4.397074e+02	-1.120073e+02	6.734734e+01	-1.607025e+02	1.165627e+01	-3.446954e+01	3.047900e+01	-6.574557e+01	-1.564620e+01	-8.494319e+01	-3.484563e+01	-1.235148e+02	-3.471784e+01	-1.468428e+02	-1.867652e+02
1.498000e+03	8.020062e+03	-6.868671e+02	1.662304e+01	2.262798e+02	-3.008864e+02	-4.502089e+01	-2.817250e+02	-7.432570e+00	-7.909341e+01	-7.032244e-01	-1.063341e+02	-7.236336e+01	-1.244699e+02	-9.050150e+01	-1.899592e+02	-1.345350e+02	-2.126788e+02	-2.481950e+02
1.499000e+03	8.368009e+03	-1.205979e+03	-2.208408e+02	-3.961448e+01	-5.293406e+02	-1.820682e+02	-4.310607e+02	-3.221156e+01	-1.289892e+02	-4.204300e+01	-1.579455e+02	-1.388198e+02	-1.746606e+02	-1.555377e+02	-2.676393e+02	-2.562324e+02	-2.862721e+02	-3.164682e+02
1.500000e+03	8.710125e+03	-1.709718e+03	-4.409897e+02	-3.252662e+02	-7.778131e+02	-3.283588e+02	-5.948633e+02	-5.963739e+01	-1.787540e+02	-8.692784e+01	-2.131287e+02	-2.060433e+02	-2.282540e+02	-2.211720e+02	-3.478016e+02	-3.868120e+02	-3.616562e+02	-3.864101e+02
1.501000e+03	9.079008e+03	-2.154798e+03	-6.224267e+02	-5.957285e+02	-1.024262e+03	-4.667208e+02	-7.575710e+02	-8.562259e+01	-2.227760e+02	-1.269836e+02	-2.624516e+02	-2.641356e+02	-2.760675e+02	-2.777551e+02	-4.200677e+02	-5.123693e+02	-4.318532e+02	-4.521468e+02
1.502000e+03	9.528310e+03	-2.511427e+03	-7.513987e+02	-8.203213e+02	-1.249255e+03	-5.813159e+02	-9.051219e+02	-1.058479e+02	-2.561785e+02	-1.538892e+02	-2.963662e+02	-3.042181e+02	-3.088109e+02	-3.166663e+02	-4.748821e+02	-6.213289e+02	-4.905612e+02	-5.085894e+02
1.503000e+03	1.011948e+04	-2.766137e+03	-8.231403e+02	-9.781994e+02	-1.439954e+03	-6.604043e+02	-1.027559e+03	-1.167203e+02	-2.755223e+02	-1.613929e+02	-3.072836e+02	-3.201928e+02	-3.191079e+02	-3.320204e+02	-5.058931e+02	-7.069619e+02	-5.336560e+02	-5.526413e+02
1.504000e+03	1.090105e+04	-2.919528e+03	-8.410236e+02	-1.061387e+03	-1.591310e+03	-6.980922e+02	-1.120094e+03	-1.162074e+02	-2.791720e+02	-1.469188e+02	-2.913063e+02	-3.098809e+02	-3.031854e+02	-3.217628e+02	-5.114336e+02	-7.681377e+02	-5.599254e+02	-5.836252e+02
1.505000e+03	1.188565e+04	-2.980626e+03	-8.141189e+02	-1.074549e+03	-1.704050e+03	-6.947155e+02	-1.182390e+03	-1.042968e+02	-2.673490e+02	-1.122352e+02	-2.491392e+02	-2.752843e+02	-2.617609e+02	-2.879082e+02	-4.945616e+02	-8.079973e+02	-5.707593e+02	-6.027425e+02
1.506000e+03	1.303253e+04	-2.960822e+03	-7.541959e+02	-1.031887e+03	-1.780656e+03	-6.559617e+02	-1.216613e+03	-8.294410e+01	-2.419570e+02	-6.294702e+01	-1.859248e+02	-2.219565e+02	-1.998769e+02	-2.359101e+02	-4.616631e+02	-8.311858e+02	-5.689733e+02	-6.118209e+02
1.507000e+03	1.424343e+04	-2.870032e+03	-6.731338e+02	-9.524072e+02	-1.821525e+03	-5.911469e+02	-1.225305e+03	-5.553199e+01	-2.062531e+02	-6.974103e+00	-1.100571e+02	-1.576913e+02	-1.257350e+02	-1.733702e+02	-4.201902e+02	-8.409612e+02	-5.573286e+02	-6.119586e+02
1.508000e+03	1.537547e+04	-2.716213e+03	-5.812997e+02	-8.550715e+02	-1.823374e+03	-5.111547e+02	-1.210062e+03	-2.602664e+01	-1.643939e+02	4.746944e+01	-3.131707e+01	-9.089350e+01	-4.886925e+01	-1.084463e+02	-3.764336e+02	-8.375347e+02	-5.374373e+02	-6.027499e+02
1.509000e+03	1.626891e+04	-2.507514e+03	-4.869563e+02	-7.550894e+02	-1.780720e+03	-4.264720e+02	-1.171464e+03	1.898016e+00	-1.208731e+02	9.372509e+01	4.113809e+01	-2.904133e+01	2.181669e+01	-4.836319e+01	-3.341667e+02	-8.183729e+02	-5.095272e+02	-5.825038e+02
1.510000e+03	1.678222e+04	-2.255219e+03	-3.964093e+02	-6.620199e+02	-1.689673e+03	-3.456364e+02	-1.110052e+03	2.551053e+01	-7.989663e+01	1.278130e+02	1.003920e+02	2.241072e+01	7.961435e+01	1.632557e+00	-2.945581e+02	-7.802277e+02	-4.731024e+02	-5.493713e+02
1.511000e+03	1.682417e+04	-1.975539e+03	-3.144744e+02	-5.797569e+02	-1.552080e+03	-2.743083e+02	-1.027684e+03	4.329980e+01	-4.480272e+01	1.485966e+02	1.426184e+02	6.049914e+01	1.208153e+02	3.869520e+01	-2.571606e+02	-7.218509e+02	-4.280900e+02	-5.028274e+02
1.512000e+03	1.637427e+04	-1.689182e+03	-2.448912e+02	-5.079526e+02	-1.377956e+03	-2.150703e+02	-9.285264e+02	5.488649e+01	-1.766082e+01	1.571451e+02	1.670747e+02	8.460282e+01	1.446793e+02	6.220625e+01	-2.213230e+02	-6.460673e+02	-3.758369e+02	-4.447587e+02
1.513000e+03	1.548639e+04	-1.418759e+03	-1.904758e+02	-4.441175e+02	-1.184966e+03	-1.678971e+02	-8.191909e+02	6.070112e+01	8.486702e-01	1.557168e+02	1.754346e+02	9.586924e+01	1.527711e+02	7.320424e+01	-1.872759e+02	-5.602387e+02	-3.194346e+02	-3.795998e+02
1.514000e+03	1.427576e+04	-1.185068e+03	-1.530212e+02	-3.855850e+02	-9.951087e+02	-1.310708e+02	-7.079781e+02	6.160825e+01	1.126031e+01	1.468282e+02	1.708187e+02	9.648481e+01	1.480250e+02	7.368936e+01	-1.564147e+02	-4.749154e+02	-2.632126e+02	-3.134266e+02
1.515000e+03	1.289370e+04	-1.003696e+03	-1.331450e+02	-3.307823e+02	-8.298937e+02	-1.022270e+02	-6.035237e+02	5.861318e+01	1.493357e+01	1.326947e+02	1.568663e+02	8.901923e+01	1.338746e+02	6.602561e+01	-1.307841e+02	-4.012691e+02	-2.116632e+02	-2.524083e+02
1.516000e+03	1.149695e+04	-8.831503e+02	-1.303557e+02	-2.796942e+02	-7.057849e+02	-7.926799e+01	-5.133707e+02	5.269375e+01	1.357954e+01	1.150676e+02	1.370476e+02	7.595707e+01	1.136319e+02	5.253949e+01	-1.121721e+02	-3.483483e+02	-1.683089e+02	-2.012807e+02
1.517000e+03	1.021916e+04	-8.249927e+02	-1.434792e+02	-2.337942e+02	-6.313618e+02	-6.102138e+01	-4.429416e+02	4.471860e+01	8.837693e+00	9.529467e+01	1.142460e+02	5.941690e+01	9.012790e+01	3.529712e+01	-1.013529e+02	-3.211554e+02	-1.349974e+02	-1.624291e+02
1.518000e+03	9.150777e+03	-8.255690e+02	-1.713180e+02	-1.958252e+02	-6.068341e+02	-4.763912e+01	-3.951629e+02	3.539022e+01	1.997045e+00	7.439960e+01	9.054989e+01	4.100910e+01	6.553612e+01	1.599390e+01	-9.784717e+01	-3.200839e+02	-1.118484e+02	-1.358306e+02
1.519000e+03	8.331010e+03	-8.782670e+02	-2.131582e+02	-1.695863e+02	-6.256196e+02	-4.072721e+01	-3.706922e+02	2.518629e+01	-6.098861e+00	5.308358e+01	6.719914e+01	2.180073e+01	4.131205e+01	-4.087479e+00	-1.002336e+02	-3.416546e+02	-9.774979e+01	-1.197156e+02
1.520000e+03	7.751922e+03	-9.750878e+02	-2.687120e+02	-1.595611e+02	-6.770554e+02	-4.311679e+01	-3.684509e+02	1.432803e+01	-1.497832e+01	3.169434e+01	4.467828e+01	2.390000e+00	1.823906e+01	-2.405000e+01	-1.067523e+02	-3.800151e+02	-9.107215e+01	-1.115428e+02
1.521000e+03	7.371558e+03	-1.106818e+03	-3.373464e+02	-1.700729e+02	-7.491203e+02	-5.815641e+01	-3.860861e+02	2.827093e+00	-2.435995e+01	1.027866e+01	2.296779e+01	-1.690653e+01	-3.397651e+00	-4.327242e+01	-1.158382e+02	-4.284944e+02	-9.023763e+01	-1.088466e+02
1.522000e+03	7.130902e+03	-1.261978e+03	-4.168927e+02	-2.038593e+02	-8.303089e+02	-8.852989e+01	-4.201015e+02	-9.367294e+00	-3.395186e+01	-1.121244e+01	1.918524e+00	-3.579523e+01	-2.352124e+01	-6.123511e+01	-1.263240e+02	-4.806666e+02	-9.392513e+01	-1.096735e+02
1.523000e+03	6.969514e+03	-1.425586e+03	-5.026856e+02	-2.603955e+02	-9.103546e+02	-1.348618e+02	-4.656623e+02	-2.216383e+01	-4.332036e+01	-3.261512e+01	-1.835965e+01	-5.376990e+01	-4.193959e+01	-7.734963e+01	-1.372840e+02	-5.307395e+02	-1.009180e+02	-1.125697e+02
1.524000e+03	6.836573e+03	-1.579114e+03	-5.875180e+02	-3.346834e+02	-9.801209e+02	-1.946124e+02	-5.163591e+02	-3.516443e+01	-5.188510e+01	-5.329268e+01	-3.724725e+01	-7.001160e+01	-5.811986e+01	-9.088366e+01	-1.476993e+02	-5.734855e+02	-1.097908e+02	-1.162940e+02
1.525000e+03	6.696571e+03	-1.702639e+03	-6.628658e+02	-4.172829e+02	-1.031376e+03	-2.618157e+02	-5.643644e+02	-4.764024e+01	-5.904448e+01	-7.209259e+01	-5.362612e+01	-8.349510e+01	-7.117939e+01	-1.010475e+02	-1.562240e+02	-6.041661e+02	-1.187012e+02	-1.195296e+02
1.526000e+03	6.530919e+03	-1.779123e+03	-7.211684e+02	-4.960044e+02	-1.057159e+03	-3.279915e+02	-6.013233e+02	-5.869474e+01	-6.438294e+01	-8.760645e+01	-6.618133e+01	-9.329297e+01	-8.013390e+01	-1.072443e+02	-1.612725e+02	-6.188623e+02	-1.254854e+02	-1.208250e+02
1.527000e+03	6.337225e+03	-1.799624e+03	-7.584227e+02	-5.590417e+02	-1.052993e+03	-3.841394e+02	-6.199979e+02	-6.757342e+01	-6.788216e+01	-9.867952e+01	-7.390701e+01	-9.898667e+01	-8.433740e+01	-1.094155e+02	-1.614737e+02	-6.153295e+02	-1.280882e+02	-1.188475e+02
1.528000e+03	6.127315e+03	-1.767409e+03	-7.760947e+02	-5.986657e+02	-1.018609e+03	-4.232638e+02	-6.162589e+02	-7.400359e+01	-7.005835e+01	-1.049895e+02	-7.664090e+01	-1.010428e+02	-8.395925e+01	-1.083593e+02	-1.563371e+02	-5.940934e+02	-1.251812e+02	-1.128526e+02
1.529000e+03	5.924035e+03	-1.699050e+03	-7.814886e+02	-6.142047e+02	-9.592924e+02	-4.425944e+02	-5.907101e+02	-7.841973e+01	-7.197099e+01	-1.074568e+02	-7.542413e+01	-1.010067e+02	-8.030654e+01	-1.058870e+02	-1.468341e+02	-5.592256e+02	-1.167110e+02	-1.031432e+02
1.530000e+03	5.756421e+03	-1.621472e+03	-7.862071e+02	-6.130900e+02	-8.859847e+02	-4.446803e+02	-5.492029e+02	-8.196391e+01	-7.508030e+01	-1.082852e+02	-7.252297e+01	-1.014004e+02	-7.582775e+01	-1.047028e+02	-1.355898e+02	-5.182337e+02	-1.041254e+02	-9.127265e+01
1.531000e+03	5.653293e+03	-1.565403e+03	-8.030105e+02	-6.092774e+02	-8.136136e+02	-4.368785e+02	-5.018248e+02	-8.623327e+01	-8.096458e+01	-1.105545e+02	-7.104632e+01	-1.052849e+02	-7.372408e+01	-1.079599e+02	-1.265010e+02	-4.807975e+02	-9.014144e+01	-7.983912e+01
1.532000e+03	5.636382e+03	-1.557041e+03	-8.419996e+02	-6.192483e+02	-7.578686e+02	-4.293091e+02	-4.604858e+02	-9.284527e+01	-9.094245e+01	-1.174481e+02	-7.422328e+01	-1.155445e+02	-7.722430e+01	-1.185424e+02	-1.238128e+02	-4.565476e+02	-7.809332e+01	-7.188343e+01
1.533000e+03	5.714905e+03	-1.610620e+03	-9.073683e+02	-6.567390e+02	-7.312710e+02	-4.319197e+02	-4.357833e+02	-1.029672e+02	-1.056817e+02	-1.313483e+02	-8.453608e+01	-1.340621e+02	-8.871537e+01	-1.382380e+02	-1.309107e+02	-4.525078e+02	-7.106161e+01	-7.006814e+01
1.534000e+03	5.883469e+03	-1.724336e+03	-9.958423e+02	-7.279786e+02	-7.397621e+02	-4.516508e+02	-4.341517e+02	-1.169782e+02	-1.249051e+02	-1.531102e+02	-1.029891e+02	-1.610368e+02	-1.090120e+02	-1.670559e+02	-1.492368e+02	-4.710300e+02	-7.107561e+01	-7.591432e+01
1.535000e+03	6.124207e+03	-1.881071e+03	-1.097354e+03	-8.291961e+02	-7.809642e+02	-4.906690e+02	-4.562564e+02	-1.343883e+02	-1.473077e+02	-1.817850e+02	-1.287886e+02	-1.947043e+02	-1.370458e+02	-2.029575e+02	-1.777393e+02	-5.089521e+02	-7.866365e+01	-8.936705e+01
1.536000e+03	6.412558e+03	-2.053654e+03	-1.197700e+03	-9.474059e+02	-8.447794e+02	-5.462218e+02	-4.971773e+02	-1.540443e+02	-1.707541e+02	-2.149153e+02	-1.595858e+02	-2.316254e+02	-1.701304e+02	-2.421659e+02	-2.131022e+02	-5.583300e+02	-9.290763e+01	-1.088503e+02
1.537000e+03	6.724769e+03	-2.212808e+03	-1.282242e+03	-1.064231e+03	-9.162343e+02	-6.120393e+02	-5.482858e+02	-1.745406e+02	-1.927368e+02	-2.493054e+02	-1.922232e+02	-2.675021e+02	-2.047441e+02	-2.800190e+02	-2.507139e+02	-6.085550e+02	-1.119732e+02	-1.317970e+02
1.538000e+03	7.044599e+03	-2.335069e+03	-1.339378e+03	-1.161325e+03	-9.797047e+02	-6.806336e+02	-6.001078e+02	-1.946694e+02	-2.109644e+02	-2.819703e+02	-2.237032e+02	-2.982660e+02	-2.375441e+02	-3.121031e+02	-2.860334e+02	-6.491811e+02	-1.339041e+02	-1.554625e+02
1.539000e+03	7.367008e+03	-2.408151e+03	-1.362771e+03	-1.225370e+03	-1.023166e+03	-7.455716e+02	-6.451321e+02	-2.137248e+02	-2.238754e+02	-3.108865e+02	-2.519828e+02	-3.210381e+02	-2.662101e+02	-3.352621e+02	-3.158387e+02	-6.725400e+02	-1.573594e+02	-1.777248e+02
1.540000e+03	7.697623e+03	-2.432372e+03	-1.351902e+03	-1.250919e+03	-1.041128e+03	-8.029315e+02	-6.796140e+02	-2.315366e+02	-2.308856e+02	-3.352499e+02	-2.762630e+02	-3.346001e+02	-2.897794e+02	-3.481137e+02	-3.388811e+02	-6.753435e+02	-1.819925e+02	-1.975815e+02
1.541000e+03	8.048035e+03	-2.418300e+03	-1.311166e+03	-1.240425e+03	-1.035429e+03	-8.515794e+02	-7.038782e+02	-2.482215e+02	-2.322792e+02	-3.551706e+02	-2.966764e+02	-3.392298e+02	-3.083681e+02	-3.509192e+02	-3.557307e+02	-6.589012e+02	-2.083086e+02	-2.151757e+02
1.542000e+03	8.428159e+03	-2.381994e+03	-1.248180e+03	-1.201967e+03	-1.013849e+03	-8.924061e+02	-7.212336e+02	-2.637684e+02	-2.288204e+02	-3.709933e+02	-3.135672e+02	-3.360468e+02	-3.224652e+02	-3.449431e+02	-3.679440e+02	-6.281100e+02	-2.370567e+02	-2.313680e+02
1.543000e+03	8.837801e+03	-2.339695e+03	-1.171950e+03	-1.146014e+03	-9.872316e+02	-9.270212e+02	-7.360927e+02	-2.776513e+02	-2.212842e+02	-3.825992e+02	-3.267493e+02	-3.262339e+02	-3.321797e+02	-3.316629e+02	-3.769642e+02	-5.897593e+02	-2.684028e+02	-2.470415e+02
1.544000e+03	9.260161e+03	-2.303587e+03	-1.091346e+03	-1.082581e+03	-9.661406e+02	-9.564929e+02	-7.520744e+02	-2.886617e+02	-2.101408e+02	-3.890391e+02	-3.351278e+02	-3.105199e+02	-3.368219e+02	-3.122129e+02	-3.832449e+02	-5.507814e+02	-3.012340e+02	-2.624227e+02
[truncated: 2,455 more rows]
