# Supplementary material for: Unravelling Mn4Ca cluster vibrations in the S1, S2 and S3 states of the Kok–Joliot cycle of photosystem II
Source: Royal Society of Chemistry journal article supplement (doi:10.1039/d4cp01307g), 2024-01-01
Supplement: d4cp01307g3.csv [file d4cp01307g3.csv]

#wavenumber	Full-system	Mn4CaO5	Diamond1	Diamnond2	Diamond3	Diamond4	Diamond5	Mn1-O1	Mn1-O2	Mn2-O1	Mn2-O2	Mn2-O3	Mn3-O2	Mn3-O3	Mn3-O3	Mn3-O4	Mn4-O4	Mn4-O5
0.000000e+00	2.151937e+02	-1.366061e+03	-4.910808e+02	-7.382709e+02	-8.731024e+02	-3.232522e+02	-3.866593e+02	-1.951603e+02	-1.697053e+02	-3.213764e+02	-2.929772e+02	-2.959215e+02	-4.423494e+02	-4.452936e+02	-3.588870e+02	-3.847835e+02	-4.883193e+02	-4.990606e+02
1.000000e+00	2.325444e+02	-1.470073e+03	-5.285382e+02	-7.946281e+02	-9.396228e+02	-3.478107e+02	-4.160831e+02	-2.100637e+02	-1.826390e+02	-3.459002e+02	-3.153747e+02	-3.184755e+02	-4.761526e+02	-4.792533e+02	-3.824364e+02	-4.141726e+02	-5.254505e+02	-5.370097e+02
2.000000e+00	2.377464e+02	-1.494225e+03	-5.373048e+02	-8.078448e+02	-9.550872e+02	-3.534778e+02	-4.228982e+02	-2.135633e+02	-1.856597e+02	-3.516460e+02	-3.206689e+02	-3.237425e+02	-4.841023e+02	-4.871758e+02	-3.857161e+02	-4.210665e+02	-5.340211e+02	-5.457647e+02
3.000000e+00	2.304917e+02	-1.436330e+03	-5.165787e+02	-7.767147e+02	-9.180964e+02	-3.397449e+02	-4.064831e+02	-2.053385e+02	-1.784877e+02	-3.380919e+02	-3.083742e+02	-3.112411e+02	-4.654735e+02	-4.683404e+02	-3.689028e+02	-4.048302e+02	-5.132666e+02	-5.245428e+02
4.000000e+00	2.126266e+02	-1.307890e+03	-4.704749e+02	-7.074313e+02	-8.360152e+02	-3.093361e+02	-3.700885e+02	-1.870271e+02	-1.625385e+02	-3.079372e+02	-2.809353e+02	-2.834486e+02	-4.239827e+02	-4.264960e+02	-3.354173e+02	-3.686897e+02	-4.673259e+02	-4.775740e+02
5.000000e+00	1.876135e+02	-1.130584e+03	-4.067650e+02	-6.116925e+02	-7.227227e+02	-2.673719e+02	-3.198411e+02	-1.617264e+02	-1.404895e+02	-2.662761e+02	-2.429774e+02	-2.450392e+02	-3.666532e+02	-3.687150e+02	-2.908948e+02	-3.187454e+02	-4.039776e+02	-4.128094e+02
6.000000e+00	1.596193e+02	-9.303788e+02	-3.347694e+02	-5.035251e+02	-5.948452e+02	-2.199783e+02	-2.630805e+02	-1.331549e+02	-1.155550e+02	-2.192148e+02	-2.000508e+02	-2.016148e+02	-3.019102e+02	-3.034743e+02	-2.416998e+02	-2.623171e+02	-3.325284e+02	-3.397631e+02
7.000000e+00	1.325648e+02	-7.314382e+02	-2.631720e+02	-3.959943e+02	-4.678538e+02	-1.728489e+02	-2.066381e+02	-1.047817e+02	-9.073527e+01	-1.724370e+02	-1.573289e+02	-1.583905e+02	-2.376038e+02	-2.386654e+02	-1.935149e+02	-2.062262e+02	-2.616278e+02	-2.672787e+02
8.000000e+00	1.094290e+02	-5.517224e+02	-1.984393e+02	-2.988218e+02	-3.532391e+02	-1.302099e+02	-1.555945e+02	-7.919286e+01	-6.827322e+01	-1.301663e+02	-1.186664e+02	-1.192466e+02	-1.795751e+02	-1.801554e+02	-1.504136e+02	-1.555509e+02	-1.976884e+02	-2.019133e+02
9.000000e+00	9.195256e+01	-4.011913e+02	-1.441733e+02	-2.174120e+02	-2.573586e+02	-9.440196e+01	-1.127741e+02	-5.782910e+01	-4.943062e+01	-9.474278e+01	-8.621261e+01	-8.634425e+01	-1.310677e+02	-1.311994e+02	-1.145691e+02	-1.131149e+02	-1.442438e+02	-1.472803e+02
1.000000e+01	8.071217e+01	-2.824332e+02	-1.013334e+02	-1.531885e+02	-1.818379e+02	-6.603354e+01	-7.892273e+01	-4.106987e+01	-3.456156e+01	-6.677187e+01	-6.054372e+01	-6.026351e+01	-9.292499e+01	-9.264479e+01	-8.649295e+01	-7.966106e+01	-1.021770e+02	-1.042815e+02
1.100000e+01	7.541956e+01	-1.927925e+02	-6.899774e+01	-1.047411e+02	-1.249370e+02	-4.448599e+01	-5.330637e+01	-2.853384e+01	-2.336942e+01	-4.562837e+01	-4.111472e+01	-4.046389e+01	-6.427711e+01	-6.362630e+01	-6.555664e+01	-5.444873e+01	-7.048834e+01	-7.189025e+01
1.200000e+01	7.527830e+01	-1.268995e+02	-4.527078e+01	-6.919053e+01	-8.317550e+01	-2.850984e+01	-3.442036e+01	-1.944072e+01	-1.521406e+01	-3.005675e+01	-2.679905e+01	-2.583005e+01	-4.336044e+01	-4.239145e+01	-5.054269e+01	-3.596725e+01	-4.720832e+01	-4.808279e+01
1.300000e+01	7.927490e+01	-7.877658e+01	-2.803895e+01	-4.332588e+01	-5.269014e+01	-1.671799e+01	-2.057883e+01	-1.291564e+01	-9.368396e+00	-1.867057e+01	-1.633806e+01	-1.512329e+01	-2.820255e+01	-2.698779e+01	-4.006637e+01	-2.253138e+01	-3.015882e+01	-3.061664e+01
1.400000e+01	8.635655e+01	-4.314633e+01	-1.543798e+01	-2.430778e+01	-3.007959e+01	-7.888084e+00	-1.028016e+01	-8.180933e+00	-5.178618e+00	-1.025937e+01	-8.619194e+00	-7.257030e+00	-1.705072e+01	-1.568856e+01	-3.282272e+01	-1.265142e+01	-1.742824e+01	-1.751798e+01
1.500000e+01	9.551001e+01	-1.595917e+01	-6.035522e+00	-9.949954e+00	-1.274922e+01	-1.080162e+00	-2.356553e+00	-4.635705e+00	-2.129770e+00	-3.905762e+00	-2.785678e+00	-1.399807e+00	-8.550138e+00	-7.164268e+00	-2.769641e+01	-5.182129e+00	-7.567164e+00	-7.285865e+00
1.600000e+01	1.057857e+02	5.615115e+00	1.183175e+00	1.289191e+00	1.090015e+00	4.370671e+00	4.022926e+00	-1.856537e+00	1.544290e-01	1.028736e+00	1.769703e+00	3.039717e+00	-1.750533e+00	-4.805146e-01	-2.379994e+01	6.810133e-01	4.089293e-01	1.099322e+00
1.700000e+01	1.163084e+02	2.343622e+01	6.916298e+00	1.044252e+01	1.258035e+01	8.914536e+00	9.413477e+00	4.385365e-01	1.941311e+00	4.974978e+00	5.461544e+00	6.477765e+00	3.964736e+00	4.980968e+00	-2.049007e+01	5.473937e+00	7.106344e+00	8.258979e+00
1.800000e+01	1.262973e+02	3.865329e+01	1.164430e+01	1.817197e+01	2.238912e+01	1.284475e+01	1.415803e+01	2.428753e+00	3.419370e+00	8.224923e+00	8.567496e+00	9.215549e+00	8.956381e+00	9.604453e+00	-1.737820e+01	9.538213e+00	1.285084e+01	1.451275e+01
1.900000e+01	1.350973e+02	5.186781e+01	1.568165e+01	2.484948e+01	3.082572e+01	1.632854e+01	1.842560e+01	4.214536e+00	4.713489e+00	1.096816e+01	1.125772e+01	1.146712e+01	1.338230e+01	1.359173e+01	-1.432293e+01	1.306523e+01	1.776042e+01	1.995338e+01
2.000000e+01	1.422171e+02	6.320887e+01	1.918335e+01	3.058829e+01	3.790840e+01	1.941539e+01	2.222956e+01	5.826300e+00	5.885010e+00	1.329834e+01	1.360107e+01	1.335705e+01	1.723115e+01	1.698718e+01	-1.138637e+01	1.611251e+01	2.179584e+01	2.450334e+01
2.100000e+01	1.473735e+02	7.240229e+01	2.214038e+01	3.527194e+01	4.342850e+01	2.204627e+01	2.544961e+01	7.229741e+00	6.927440e+00	1.521294e+01	1.556940e+01	1.491064e+01	2.036120e+01	1.970249e+01	-8.749906e+00	1.861628e+01	2.481218e+01	2.797655e+01
2.200000e+01	1.505433e+02	7.891909e+01	2.440484e+01	3.863034e+01	4.706014e+01	2.408703e+01	2.788144e+01	8.341861e+00	7.771830e+00	1.663302e+01	1.706296e+01	1.606298e+01	2.256725e+01	2.156733e+01	-6.608326e+00	2.042742e+01	2.663269e+01	3.016475e+01
2.300000e+01	1.520184e+02	8.223077e+01	2.576529e+01	4.037882e+01	4.852718e+01	2.539330e+01	2.931996e+01	9.064986e+00	8.310208e+00	1.745509e+01	1.796555e+01	1.670030e+01	2.367839e+01	2.241321e+01	-5.077418e+00	2.138174e+01	2.714542e+01	3.094635e+01
2.400000e+01	1.524453e+02	8.211240e+01	2.605745e+01	4.038762e+01	4.778853e+01	2.589009e+01	2.965746e+01	9.333290e+00	8.433707e+00	1.762376e+01	1.821571e+01	1.672416e+01	2.366333e+01	2.217185e+01	-4.147983e+00	2.139111e+01	2.639740e+01	3.038907e+01
2.500000e+01	1.528110e+02	7.887283e+01	2.526638e+01	3.881521e+01	4.516847e+01	2.563338e+01	2.895963e+01	9.154969e+00	8.070935e+00	1.719547e+01	1.786370e+01	1.611141e+01	2.270367e+01	2.095146e+01	-3.699076e+00	2.052170e+01	2.464676e+01	2.880371e+01
2.600000e+01	1.543395e+02	7.339454e+01	2.357137e+01	3.614108e+01	4.136393e+01	2.482173e+01	2.748345e+01	8.630025e+00	7.208864e+00	1.636253e+01	1.708494e+01	1.494134e+01	2.119961e+01	1.905609e+01	-3.555946e+00	1.902424e+01	2.233968e+01	2.671466e+01
2.700000e+01	1.582853e+02	6.694159e+01	2.130983e+01	3.307535e+01	3.730742e+01	2.374794e+01	2.562290e+01	7.931608e+00	5.886237e+00	1.542361e+01	1.613996e+01	1.337822e+01	1.969701e+01	1.693533e+01	-3.559022e+00	1.729856e+01	2.000884e+01	2.474408e+01
2.800000e+01	1.656533e+02	6.080738e+01	1.887767e+01	3.038143e+01	3.393142e+01	2.271132e+01	2.380242e+01	7.254534e+00	4.164682e+00	1.471301e+01	1.529882e+01	1.162314e+01	1.875818e+01	1.508255e+01	-3.609362e+00	1.580409e+01	1.812728e+01	2.344567e+01
2.900000e+01	1.769187e+02	5.596224e+01	1.661804e+01	2.869261e+01	3.193116e+01	2.193471e+01	2.236535e+01	6.750224e+00	2.096434e+00	1.452162e+01	1.476845e+01	9.867815e+00	1.882469e+01	1.392410e+01	-3.672299e+00	1.495226e+01	1.697886e+01	2.315198e+01
3.000000e+01	1.918521e+02	5.287360e+01	1.475690e+01	2.840749e+01	3.163028e+01	2.153239e+01	2.151056e+01	6.474900e+00	-2.889843e-01	1.504589e+01	1.466158e+01	8.281994e+00	2.012540e+01	1.374585e+01	-3.744207e+00	1.502406e+01	1.660616e+01	2.390021e+01
3.100000e+01	2.095475e+02	5.159633e+01	1.341942e+01	2.971144e+01	3.301044e+01	2.155244e+01	2.131032e+01	6.373669e+00	-2.966456e+00	1.638588e+01	1.502539e+01	7.045744e+00	2.266561e+01	1.468599e+01	-3.804519e+00	1.614376e+01	1.686663e+01	2.547212e+01
3.200000e+01	2.287042e+02	5.210126e+01	1.271824e+01	3.270935e+01	3.589259e+01	2.207923e+01	2.180413e+01	6.309114e+00	-5.870452e+00	1.858869e+01	1.591731e+01	6.409116e+00	2.630016e+01	1.679198e+01	-3.778899e+00	1.831360e+01	1.757895e+01	2.753672e+01
3.300000e+01	2.481189e+02	5.468847e+01	1.286570e+01	3.759907e+01	4.018580e+01	2.334729e+01	2.312516e+01	6.125507e+00	-8.844500e+00	2.171019e+01	1.748871e+01	6.740175e+00	3.085882e+01	2.011030e+01	-3.530855e+00	2.148807e+01	1.869768e+01	2.983977e+01
3.400000e+01	2.672354e+02	6.027326e+01	1.424513e+01	4.478754e+01	4.608252e+01	2.580184e+01	2.559350e+01	5.725516e+00	-1.161096e+01	2.585608e+01	2.002766e+01	8.519600e+00	3.626786e+01	2.475981e+01	-2.885245e+00	2.564777e+01	2.043471e+01	3.236111e+01
3.500000e+01	2.865233e+02	7.036585e+01	1.738785e+01	5.486432e+01	5.409198e+01	3.005382e+01	2.971632e+01	5.130586e+00	-1.377981e+01	3.116764e+01	2.392217e+01	1.225725e+01	4.260699e+01	3.094209e+01	-1.675628e+00	3.083018e+01	2.326176e+01	3.536959e+01
3.600000e+01	3.074639e+02	8.667800e+01	2.283754e+01	6.839767e+01	6.486355e+01	3.671485e+01	3.606685e+01	4.500793e+00	-1.490023e+01	3.773776e+01	2.953392e+01	1.833673e+01	5.006085e+01	3.886366e+01	1.987506e-01	3.708979e+01	2.777372e+01	3.934219e+01
3.700000e+01	3.320515e+02	1.104435e+02	3.093128e+01	8.559389e+01	7.883926e+01	4.614897e+01	4.506390e+01	4.103805e+00	-1.454450e+01	4.547579e+01	3.701131e+01	2.682747e+01	5.876630e+01	4.858246e+01	2.722509e+00	4.439076e+01	3.444847e+01	4.476539e+01
3.800000e+01	3.619262e+02	1.416771e+02	4.156993e+01	1.059388e+02	9.585894e+01	5.822277e+01	5.672236e+01	4.241273e+00	-1.240436e+01	5.397430e+01	4.610735e+01	3.732866e+01	6.860997e+01	5.983127e+01	5.736622e+00	5.247394e+01	4.338496e+01	5.188458e+01
3.900000e+01	3.974646e+02	1.786630e+02	5.407336e+01	1.279855e+02	1.148858e+02	7.215511e+01	7.047236e+01	5.157961e+00	-8.377715e+00	6.245110e+01	5.608670e+01	4.891541e+01	7.906989e+01	7.189857e+01	8.948202e+00	6.076840e+01	5.411740e+01	6.049342e+01
4.000000e+01	4.372397e+02	2.179217e+02	6.720291e+01	1.494336e+02	1.339997e+02	8.654711e+01	8.513505e+01	6.966666e+00	-2.624807e+00	6.982776e+01	6.579097e+01	6.023626e+01	8.919710e+01	8.364235e+01	1.198418e+01	6.841575e+01	6.558391e+01	6.984859e+01
4.100000e+01	4.781639e+02	2.547491e+02	7.937880e+01	1.675467e+02	1.507119e+02	9.961492e+01	9.909283e+01	9.615565e+00	4.422644e+00	7.495621e+01	7.387707e+01	6.976326e+01	9.778325e+01	9.366937e+01	1.447987e+01	7.443416e+01	7.627766e+01	7.875601e+01
4.200000e+01	5.163581e+02	2.841998e+02	8.903837e+01	1.798092e+02	1.625246e+02	1.095692e+02	1.106164e+02	1.290537e+01	1.210640e+01	7.693204e+01	7.916657e+01	7.613304e+01	1.036759e+02	1.006423e+02	1.617371e+01	7.797932e+01	8.454522e+01	8.581440e+01
4.300000e+01	5.484716e+02	3.021956e+02	9.500723e+01	1.845908e+02	1.675415e+02	1.150205e+02	1.182445e+02	1.654024e+01	1.963401e+01	7.537329e+01	8.097749e+01	7.846703e+01	1.061235e+02	1.036130e+02	1.696715e+01	7.859733e+01	8.894407e+01	8.974372e+01
4.400000e+01	5.729565e+02	3.063646e+02	9.673105e+01	1.815527e+02	1.648984e+02	1.152704e+02	1.210841e+02	2.018204e+01	2.619614e+01	7.053497e+01	7.929589e+01	7.654903e+01	1.050034e+02	1.022565e+02	1.691445e+01	7.634867e+01	8.854969e+01	8.969324e+01
4.500000e+01	5.907816e+02	2.963213e+02	9.426681e+01	1.716158e+02	1.548533e+02	1.103901e+02	1.189338e+02	2.348138e+01	3.107822e+01	6.318864e+01	7.470009e+01	7.078545e+01	1.008301e+02	9.691541e+01	1.613664e+01	7.173235e+01	8.312088e+01	8.543002e+01
4.600000e+01	6.052706e+02	2.733337e+02	8.804471e+01	1.565041e+02	1.385189e+02	1.010735e+02	1.122067e+02	2.608061e+01	3.374164e+01	5.430310e+01	6.806073e+01	6.196409e+01	9.453982e+01	8.844312e+01	1.469408e+01	6.543625e+01	7.308261e+01	7.735209e+01
4.700000e+01	6.210669e+02	2.396044e+02	7.853389e+01	1.380707e+02	1.173846e+02	8.835170e+01	1.017205e+02	2.761036e+01	3.386854e+01	4.466537e+01	6.015193e+01	5.092351e+01	8.714702e+01	7.791855e+01	1.248335e+01	5.803414e+01	5.935033e+01	6.633313e+01
4.800000e+01	6.425442e+02	1.975533e+02	6.601002e+01	1.177204e+02	9.286169e+01	7.330641e+01	8.846916e+01	2.771451e+01	3.138568e+01	3.462434e+01	5.136400e+01	3.829546e+01	7.942478e+01	6.635621e+01	9.223931e+00	4.978711e+01	4.307443e+01	5.346616e+01
4.900000e+01	6.721845e+02	1.494741e+02	5.058385e+01	9.619678e+01	6.607176e+01	5.691204e+01	7.348156e+01	2.612816e+01	2.649076e+01	2.409308e+01	4.166948e+01	2.445560e+01	7.174103e+01	5.452715e+01	4.562225e+00	4.066262e+01	2.540894e+01	3.980841e+01
5.000000e+01	7.094671e+02	9.771303e+01	3.251528e+01	7.382182e+01	3.796779e+01	4.005474e+01	5.780613e+01	2.280056e+01	1.969112e+01	1.282414e+01	3.087274e+01	9.714585e+00	6.410712e+01	4.294897e+01	-1.739334e+00	3.057555e+01	7.391971e+00	2.622611e+01
5.100000e+01	7.506712e+02	4.521184e+01	1.266533e+01	5.104660e+01	9.706015e+00	2.367273e+01	4.257800e+01	1.801738e+01	1.183385e+01	8.314482e-01	1.902362e+01	-5.352235e+00	5.639873e+01	3.202291e+01	-9.611884e+00	1.973674e+01	-1.003107e+01	1.339118e+01
5.200000e+01	7.897087e+02	-4.001652e+00	-7.180042e+00	2.900008e+01	-1.696290e+01	8.883608e+00	2.906688e+01	1.245517e+01	4.078537e+00	-1.125860e+01	6.773401e+00	-1.963544e+01	4.863544e+01	2.222665e+01	-1.858548e+01	8.924706e+00	-2.588802e+01	1.907593e+00
5.300000e+01	8.197664e+02	-4.484389e+01	-2.437356e+01	9.695258e+00	-3.956217e+01	-3.040865e+00	1.860468e+01	7.110415e+00	-2.239854e+00	-2.213372e+01	-4.546015e+00	-3.148424e+01	4.117945e+01	1.424129e+01	-2.785170e+01	-4.881387e-01	-3.907449e+01	-7.528615e+00
5.400000e+01	8.352380e+02	-7.200409e+01	-3.596828e+01	-4.312293e+00	-5.521184e+01	-1.091523e+01	1.234965e+01	3.087120e+00	-5.875938e+00	-3.009234e+01	-1.322264e+01	-3.905568e+01	3.474337e+01	8.910416e+00	-3.647628e+01	-6.827409e+00	-4.838491e+01	-1.406498e+01
5.500000e+01	8.332947e+02	-8.146804e+01	-3.965420e+01	-1.077065e+01	-6.140895e+01	-1.403645e+01	1.093248e+01	1.286163e+00	-6.021553e+00	-3.363263e+01	-1.776707e+01	-4.094066e+01	3.017003e+01	6.996549e+00	-4.368668e+01	-8.663639e+00	-5.274577e+01	-1.682164e+01
5.600000e+01	8.145524e+02	-7.223716e+01	-3.473725e+01	-8.786980e+00	-5.703894e+01	-1.257055e+01	1.410884e+01	2.091606e+00	-2.626633e+00	-3.211059e+01	-1.758096e+01	-3.682915e+01	2.804224e+01	8.794168e+00	-4.912346e+01	-5.431128e+00	-5.160821e+01	-1.521670e+01
5.700000e+01	7.826323e+02	-4.751925e+01	-2.274741e+01	3.492987e-01	-4.322733e+01	-7.734766e+00	2.057633e+01	5.170310e+00	3.443758e+00	-2.619113e+01	-1.339777e+01	-2.791800e+01	2.826742e+01	1.374733e+01	-5.295597e+01	2.120037e+00	-4.534766e+01	-9.372647e+00
5.800000e+01	7.428488e+02	-1.474472e+01	-7.361970e+00	1.298593e+01	-2.361989e+01	-1.644182e+00	2.808398e+01	9.477119e+00	1.052009e+01	-1.788200e+01	-7.277074e+00	-1.683934e+01	2.982545e+01	2.026333e+01	-5.581111e+01	1.184622e+01	-3.546629e+01	-4.060640e-01
5.900000e+01	7.005807e+02	1.586166e+01	6.425384e+00	2.377259e+01	-3.834786e+00	3.177160e+00	3.387364e+01	1.349292e+01	1.651983e+01	-1.009438e+01	-2.107733e+00	-7.067758e+00	3.084059e+01	2.588072e+01	-5.852906e+01	2.060214e+01	-2.443699e+01	9.591997e+00
6.000000e+01	6.599477e+02	3.388278e+01	1.366954e+01	2.706275e+01	9.879478e+00	4.484232e+00	3.537160e+01	1.563884e+01	1.951943e+01	-5.849812e+00	-7.696312e-01	-1.969482e+00	2.903255e+01	2.783285e+01	-6.181796e+01	2.503757e+01	-1.515805e+01	1.797037e+01
6.100000e+01	6.231951e+02	3.172104e+01	1.093762e+01	1.864429e+01	1.242321e+01	9.771230e-01	3.093728e+01	1.473905e+01	1.832090e+01	-7.383201e+00	-5.236347e+00	-3.801591e+00	2.244628e+01	2.388117e+01	-6.591611e+01	2.257695e+01	-1.015360e+01	2.224195e+01
6.200000e+01	5.908437e+02	7.018458e+00	-2.619090e+00	-2.780125e+00	1.481248e+00	-7.275523e+00	2.042092e+01	1.037775e+01	1.281279e+01	-1.543180e+01	-1.592330e+01	-1.299699e+01	1.021733e+01	1.314377e+01	-7.037712e+01	1.226459e+01	-1.078313e+01	2.087618e+01
6.300000e+01	5.623662e+02	-3.638165e+01	-2.494835e+01	-3.490448e+01	-2.157791e+01	-1.879677e+01	5.317227e+00	3.026810e+00	3.992985e+00	-2.894126e+01	-3.149697e+01	-2.797530e+01	-6.928648e+00	-3.406869e+00	-7.406400e+01	-4.827362e+00	-1.675030e+01	1.385751e+01
6.400000e+01	5.370467e+02	-8.931565e+01	-5.163775e+01	-7.221228e+01	-5.190225e+01	-3.105961e+01	-1.157148e+01	-6.098459e+00	-6.353896e+00	-4.528377e+01	-4.919966e+01	-4.553942e+01	-2.667229e+01	-2.301196e+01	-7.537570e+01	-2.579578e+01	-2.610620e+01	2.781226e+00
6.500000e+01	5.147410e+02	-1.397493e+02	-7.711671e+01	-1.073561e+02	-8.241838e+01	-4.112873e+01	-2.687274e+01	-1.539882e+01	-1.620237e+01	-6.091427e+01	-6.557008e+01	-6.171801e+01	-4.563750e+01	-4.178537e+01	-7.264765e+01	-4.665845e+01	-3.575965e+01	-9.558959e+00
6.600000e+01	4.963801e+02	-1.759518e+02	-9.609904e+01	-1.330596e+02	-1.057147e+02	-4.638312e+01	-3.753703e+01	-2.333200e+01	-2.385418e+01	-7.224477e+01	-7.731191e+01	-7.276714e+01	-6.029181e+01	-5.574701e+01	-6.459785e+01	-6.339888e+01	-4.231551e+01	-1.993260e+01
6.700000e+01	4.841416e+02	-1.893070e+02	-1.047811e+02	-1.438823e+02	-1.158779e+02	-4.509770e+01	-4.157836e+01	-2.877909e+01	-2.833155e+01	-7.644943e+01	-8.202365e+01	-7.600206e+01	-6.787970e+01	-6.185810e+01	-5.066514e+01	-7.293030e+01	-4.294734e+01	-2.549506e+01
6.800000e+01	4.812372e+02	-1.758716e+02	-1.014321e+02	-1.372614e+02	-1.096740e+02	-3.671744e+01	-3.841702e+01	-3.122261e+01	-2.948034e+01	-7.195167e+01	-7.856741e+01	-7.020954e+01	-6.705133e+01	-5.869347e+01	-3.112604e+01	-7.365145e+01	-3.602229e+01	-2.438925e+01
6.900000e+01	4.912906e+02	-1.363342e+02	-8.627002e+01	-1.135530e+02	-8.677482e+01	-2.176914e+01	-2.874287e+01	-3.070962e+01	-2.779035e+01	-5.847962e+01	-6.699865e+01	-5.556046e+01	-5.799208e+01	-4.655392e+01	-6.966938e+00	-6.545356e+01	-2.132111e+01	-1.597323e+01
7.000000e+01	5.173641e+02	-7.467850e+01	-6.079850e+01	-7.521614e+01	-4.914705e+01	-1.484313e+00	-1.401122e+01	-2.766287e+01	-2.404720e+01	-3.675128e+01	-4.814923e+01	-3.313566e+01	-4.208012e+01	-2.706659e+01	2.041054e+01	-4.927836e+01	1.313870e-01	-6.975393e-01
7.100000e+01	5.608399e+02	3.681811e+00	-2.697221e+01	-2.560690e+01	-3.244082e-02	2.269486e+01	4.178691e+00	-2.265506e+01	-1.898061e+01	-7.991631e+00	-2.308518e+01	-4.317175e+00	-2.128947e+01	-2.521493e+00	4.951105e+01	-2.650795e+01	2.647550e+01	2.021141e+01
7.200000e+01	6.204869e+02	9.344214e+01	1.342204e+01	3.204689e+01	5.696723e+01	4.952271e+01	2.454893e+01	-1.625187e+01	-1.304772e+01	2.646967e+01	7.304568e+00	2.967390e+01	2.373165e+00	2.474248e+01	7.895942e+01	1.495778e+00	5.547134e+01	4.507379e+01
7.300000e+01	6.920572e+02	1.900616e+02	5.893253e+01	9.508198e+01	1.183557e+02	7.811427e+01	4.627600e+01	-8.969216e+00	-6.408106e+00	6.534046e+01	4.240588e+01	6.790172e+01	2.718035e+01	5.267619e+01	1.075418e+02	3.350212e+01	8.485330e+01	7.196476e+01
7.400000e+01	7.686179e+02	2.894891e+02	1.081684e+02	1.611746e+02	1.807181e+02	1.078210e+02	6.878715e+01	-1.314616e+00	9.503456e-01	1.072178e+02	8.163391e+01	1.094830e+02	5.169160e+01	7.954072e+01	1.341048e+02	6.818393e+01	1.125338e+02	9.880287e+01
7.500000e+01	8.415936e+02	3.873924e+02	1.593209e+02	2.277257e+02	2.404503e+02	1.379025e+02	9.138033e+01	6.165242e+00	9.039925e+00	1.502805e+02	1.239818e+02	1.531555e+02	7.457011e+01	1.037439e+02	1.574198e+02	1.037584e+02	1.366914e+02	1.234046e+02
7.600000e+01	9.022717e+02	4.785413e+02	2.098139e+02	2.913191e+02	2.936023e+02	1.671753e+02	1.129105e+02	1.290362e+01	1.776409e+01	1.920493e+02	1.676080e+02	1.969102e+02	9.440886e+01	1.237111e+02	1.761322e+02	1.377846e+02	1.558172e+02	1.436117e+02
7.700000e+01	9.434001e+02	5.568710e+02	2.563467e+02	3.476629e+02	3.361092e+02	1.938379e+02	1.317462e+02	1.842011e+01	2.692441e+01	2.294217e+02	2.097037e+02	2.379264e+02	1.097364e+02	1.379592e+02	1.888723e+02	1.673301e+02	1.687785e+02	1.575444e+02
7.800000e+01	9.605061e+02	6.163592e+02	2.953797e+02	3.921626e+02	3.644399e+02	2.156022e+02	1.460600e+02	2.246924e+01	3.631779e+01	2.590612e+02	2.467647e+02	2.729102e+02	1.192523e+02	1.453980e+02	1.945106e+02	1.895192e+02	1.749199e+02	1.639390e+02
7.900000e+01	9.526522e+02	6.524069e+02	3.238842e+02	4.209371e+02	3.764384e+02	2.301278e+02	1.543471e+02	2.514818e+01	4.584142e+01	2.780421e+02	2.752152e+02	2.987358e+02	1.222012e+02	1.457221e+02	1.924632e+02	2.022616e+02	1.741760e+02	1.624489e+02
8.000000e+01	9.224758e+02	6.631333e+02	3.400364e+02	4.318512e+02	3.719936e+02	2.356214e+02	1.559483e+02	2.689210e+01	5.551903e+01	2.845166e+02	2.921745e+02	3.131440e+02	1.187070e+02	1.396768e+02	1.829248e+02	2.048437e+02	1.671491e+02	1.537765e+02
8.100000e+01	8.755151e+02	6.500256e+02	3.435634e+02	4.251226e+02	3.532286e+02	2.313848e+02	1.513549e+02	2.834141e+01	6.541301e+01	2.781497e+02	2.960977e+02	3.152218e+02	1.099008e+02	1.290250e+02	1.669328e+02	1.981200e+02	1.551078e+02	1.395556e+02
8.200000e+01	8.189890e+02	6.176779e+02	3.356280e+02	4.032652e+02	3.241087e+02	2.181092e+02	1.421698e+02	3.013104e+01	7.546074e+01	2.601666e+02	2.870795e+02	3.054967e+02	9.776841e+01	1.161858e+02	1.462414e+02	1.842274e+02	1.398805e+02	1.220083e+02
8.300000e+01	7.603499e+02	5.727515e+02	3.183533e+02	3.704307e+02	2.896121e+02	1.978130e+02	1.307568e+02	3.269208e+01	8.532713e+01	2.330257e+02	2.667546e+02	2.856610e+02	8.476962e+01	1.036763e+02	1.230516e+02	1.659696e+02	1.236417e+02	1.034893e+02
8.400000e+01	7.059976e+02	5.225799e+02	2.942394e+02	3.314540e+02	2.547643e+02	1.734506e+02	1.197274e+02	3.614857e+01	9.436570e+01	1.998734e+02	2.378769e+02	2.580907e+02	7.336317e+01	9.357712e+01	9.968151e+01	1.461504e+02	1.086133e+02	8.606168e+01
8.500000e+01	6.604787e+02	4.738979e+02	2.657158e+02	2.909671e+02	2.238393e+02	1.483335e+02	1.114579e+02	4.034184e+01	1.017258e+02	1.639897e+02	2.037499e+02	2.253738e+02	6.559319e+01	8.721729e+01	7.825778e+01	1.271143e+02	9.672446e+01	7.122077e+01
8.600000e+01	6.263100e+02	4.320159e+02	2.349459e+02	2.528369e+02	1.999020e+02	1.255516e+02	1.077785e+02	4.494931e+01	1.065629e+02	1.283828e+02	1.676781e+02	1.899964e+02	6.284024e+01	8.515872e+01	6.047563e+01	1.106098e+02	8.929171e+01	5.980715e+01
8.700000e+01	6.043283e+02	4.004942e+02	2.038299e+02	2.199733e+02	1.847022e+02	1.075439e+02	1.098734e+02	4.961819e+01	1.082487e+02	9.558111e+01	1.325482e+02	1.542116e+02	6.576144e+01	8.742500e+01	4.744741e+01	9.791070e+01	8.679105e+01	5.208081e+01
8.800000e+01	5.943022e+02	3.811513e+02	1.740442e+02	1.943826e+02	1.787972e+02	9.587824e+01	1.183270e+02	5.403246e+01	1.064764e+02	6.756780e+01	1.005589e+02	1.200117e+02	7.437067e+01	9.382359e+01	3.963566e+01	9.001666e+01	8.878015e+01	4.787915e+01
8.900000e+01	5.955056e+02	3.741547e+02	1.469673e+02	1.772653e+02	1.817400e+02	9.119927e+01	1.331985e+02	5.787543e+01	1.012158e+02	4.575150e+01	7.307165e+01	8.909180e+01	8.817318e+01	1.041934e+02	3.686037e+01	8.775076e+01	9.398894e+01	4.676942e+01
9.000000e+01	6.070408e+02	3.780241e+02	1.234549e+02	1.690117e+02	1.922088e+02	9.325131e+01	1.540260e+02	6.071873e+01	9.256439e+01	3.089054e+01	5.054661e+01	6.273609e+01	1.062753e+02	1.184648e+02	3.836972e+01	9.166523e+01	1.005433e+02	4.812485e+01
9.100000e+01	6.278522e+02	3.895598e+02	1.035619e+02	1.690719e+02	2.080490e+02	1.009071e+02	1.797460e+02	6.192387e+01	8.060415e+01	2.295781e+01	3.255980e+01	4.163800e+01	1.274336e+02	1.365119e+02	4.296438e+01	1.017968e+02	1.062519e+02	5.110201e+01
9.200000e+01	6.565034e+02	4.038955e+02	8.639116e+01	1.758053e+02	2.263020e+02	1.122170e+02	2.086105e+02	6.065256e+01	6.537689e+01	2.101429e+01	1.793121e+01	2.573855e+01	1.500664e+02	1.578738e+02	4.916585e+01	1.174079e+02	1.088939e+02	5.456295e+01
9.300000e+01	6.908770e+02	4.149475e+02	7.022044e+01	1.864745e+02	2.433560e+02	1.245747e+02	2.382373e+02	5.603487e+01	4.701718e+01	2.320326e+01	4.994438e+00	1.418553e+01	1.722886e+02	1.814797e+02	5.541750e+01	1.368658e+02	1.064899e+02	5.704286e+01
9.400000e+01	7.279769e+02	4.164141e+02	5.294119e+01	1.975172e+02	2.553292e+02	1.351029e+02	2.658976e+02	4.746013e+01	2.598249e+01	2.695868e+01	-8.000986e+00	5.481041e+00	1.920359e+02	2.055179e+02	6.030128e+01	1.577534e+02	9.757559e+01	5.687275e+01
9.500000e+01	7.639936e+02	4.032057e+02	3.268872e+01	2.051118e+02	2.586955e+02	1.412669e+02	2.890293e+02	3.487646e+01	3.243784e+00	2.944489e+01	-2.242888e+01	-2.187727e+00	2.072992e+02	2.275403e+02	6.274288e+01	1.772073e+02	8.148796e+01	5.250210e+01
9.600000e+01	7.947232e+02	3.728874e+02	8.446886e+00	2.059200e+02	2.510143e+02	1.415738e+02	3.058267e+02	1.895672e+01	-1.970004e+01	2.814686e+01	-3.889197e+01	-1.050979e+01	2.164295e+02	2.448116e+02	6.216669e+01	1.923998e+02	5.861424e+01	4.294981e+01
9.700000e+01	8.163173e+02	3.265842e+02	-1.958064e+01	1.978115e+02	2.315355e+02	1.360918e+02	3.156768e+02	1.033941e+00	-4.104243e+01	2.146169e+01	-5.701627e+01	-2.061451e+01	2.184257e+02	2.548274e+02	5.855929e+01	2.010469e+02	3.048844e+01	2.820824e+01
9.800000e+01	8.262037e+02	2.689397e+02	-4.992954e+01	1.803742e+02	2.014616e+02	1.265421e+02	3.192432e+02	-1.719052e+01	-5.906334e+01	9.133671e+00	-7.549306e+01	-3.273895e+01	2.131128e+02	2.558668e+02	5.241587e+01	2.018349e+02	-3.735412e-01	9.407602e+00
9.900000e+01	8.238964e+02	2.070998e+02	-8.011820e+01	1.550947e+02	1.637767e+02	1.158659e+02	3.181327e+02	-3.405697e+01	-7.254208e+01	-7.576283e+00	-9.233535e+01	-4.606114e+01	2.011555e+02	2.474296e+02	4.457800e+01	1.946909e+02	-3.091431e+01	-1.135832e+01
1.000000e+02	8.113824e+02	1.491051e+02	-1.070413e+02	1.251866e+02	1.227186e+02	1.074025e+02	3.142700e+02	-4.831308e+01	-8.101538e+01	-2.602615e+01	-1.052478e+02	-5.872817e+01	1.839146e+02	2.304340e+02	3.601153e+01	1.808418e+02	-5.812327e+01	-3.148820e+01
1.010000e+02	7.928686e+02	1.022891e+02	-1.273928e+02	9.510771e+01	8.307956e+01	1.039876e+02	3.092374e+02	-5.929947e+01	-8.477738e+01	-4.261565e+01	-1.120045e+02	-6.809326e+01	1.632008e+02	2.071119e+02	2.759738e+01	1.626347e+02	-7.955523e+01	-4.842900e+01
1.020000e+02	7.738762e+02	7.218319e+01	-1.380785e+02	6.983529e+01	4.952057e+01	1.073000e+02	3.038557e+02	-6.691060e+01	-8.463668e+01	-5.344209e+01	-1.107795e+02	-7.116787e+01	1.410030e+02	1.806145e+02	1.999912e+01	1.431143e+02	-9.359381e+01	-6.013024e+01
1.030000e+02	7.599178e+02	6.209329e+01	-1.366497e+02	5.398398e+01	2.599530e+01	1.176494e+02	2.981619e+02	-7.138923e+01	-8.155083e+01	-5.509917e+01	-1.004259e+02	-6.526048e+01	1.192444e+02	1.544097e+02	1.363050e+01	1.254140e+02	-9.941873e+01	-6.528354e+01
1.040000e+02	7.551609e+02	7.316183e+01	-1.217754e+02	5.088606e+01	1.528145e+01	1.341794e+02	2.917372e+02	-7.307591e+01	-7.629847e+01	-4.547719e+01	-8.071702e+01	-4.869951e+01	9.958556e+01	1.316030e+02	8.694936e+00	1.120813e+02	-9.679988e+01	-6.336384e+01
1.050000e+02	7.614980e+02	1.045667e+02	-9.368464e+01	6.181442e+01	1.859116e+01	1.552901e+02	2.841690e+02	-7.223325e+01	-6.931408e+01	-2.437085e+01	-5.251870e+01	-2.145148e+01	8.326595e+01	1.143331e+02	5.237820e+00	1.045087e+02	-8.591763e+01	-5.457038e+01
1.060000e+02	7.783024e+02	1.536091e+02	-5.442006e+01	8.556413e+01	3.528689e+01	1.790492e+02	2.753791e+02	-6.901036e+01	-6.072654e+01	6.306217e+00	-1.781808e+01	1.459017e+01	7.097405e+01	1.033823e+02	3.159301e+00	1.026367e+02	-6.734995e+01	-3.975787e+01
1.070000e+02	8.029023e+02	2.157024e+02	-7.734367e+00	1.185687e+02	6.281099e+01	2.034476e+02	2.656537e+02	-6.354035e+01	-5.055574e+01	4.282113e+01	2.047246e+01	5.580582e+01	6.276297e+01	9.809635e+01	2.175919e+00	1.050278e+02	-4.221694e+01	-2.037229e+01
1.080000e+02	8.315695e+02	2.844986e+02	4.143186e+01	1.555889e+02	9.696167e+01	2.265013e+02	2.554035e+02	-5.610626e+01	-3.896398e+01	8.039564e+01	5.895259e+01	9.753795e+01	5.805110e+01	9.663649e+01	1.768280e+00	1.092983e+02	-1.233672e+01	1.666423e+00
1.090000e+02	8.606746e+02	3.524205e+02	8.778852e+01	1.908175e+02	1.325675e+02	2.463020e+02	2.448439e+02	-4.728630e+01	-2.644850e+01	1.142369e+02	9.432274e+01	1.350747e+02	5.574302e+01	9.649497e+01	1.179134e+00	1.127792e+02	1.978818e+01	2.420371e+01
1.100000e+02	8.876501e+02	4.116828e+02	1.266120e+02	2.190799e+02	1.644566e+02	2.611192e+02	2.338214e+02	-3.800024e+01	-1.389247e+01	1.405044e+02	1.239477e+02	1.646121e+02	5.446786e+01	9.513230e+01	-4.848817e-01	1.132069e+02	5.124949e+01	4.521753e+01
1.110000e+02	9.115081e+02	4.556016e+02	1.544721e+02	2.367716e+02	1.884722e+02	2.695831e+02	2.219039e+02	-2.941717e+01	-2.453132e+00	1.569252e+02	1.462079e+02	1.838891e+02	5.288258e+01	9.056387e+01	-4.039241e+00	1.092462e+02	7.922584e+01	6.322665e+01
1.120000e+02	9.328199e+02	4.797954e+02	1.695900e+02	2.422866e+02	2.022409e+02	2.708869e+02	2.086838e+02	-2.273734e+01	6.668192e+00	1.629218e+02	1.605300e+02	1.923273e+02	4.995939e+01	8.175664e+01	-9.944144e+00	1.007189e+02	1.015218e+02	7.759595e+01
1.130000e+02	9.532230e+02	4.828801e+02	1.718047e+02	2.359008e+02	2.054854e+02	2.649127e+02	1.941126e+02	-1.891137e+01	1.248261e+01	1.593221e+02	1.671280e+02	1.907160e+02	4.518482e+01	6.877286e+01	-1.805695e+01	8.852218e+01	1.169629e+02	8.861299e+01
1.140000e+02	9.746403e+02	4.664696e+02	1.622615e+02	2.192835e+02	1.998377e+02	2.522316e+02	1.786803e+02	-1.839132e+01	1.440070e+01	1.478610e+02	1.666072e+02	1.806529e+02	3.863063e+01	5.267637e+01	-2.751868e+01	7.430978e+01	1.255277e+02	9.729857e+01
1.150000e+02	9.984611e+02	4.345639e+02	1.430045e+02	1.948996e+02	1.882686e+02	2.340026e+02	1.633519e+02	-2.100622e+01	1.229288e+01	1.307118e+02	1.596384e+02	1.640108e+02	3.088879e+01	3.526122e+01	-3.684784e+01	6.006107e+01	1.282074e+02	1.050208e+02
1.160000e+02	1.024947e+03	3.926063e+02	1.166225e+02	1.655222e+02	1.743274e+02	2.118507e+02	1.493097e+02	-2.601791e+01	6.428199e+00	1.101945e+02	1.468552e+02	1.426406e+02	2.288167e+01	1.866699e+01	-4.424765e+01	4.765355e+01	1.266737e+02	1.130507e+02
1.170000e+02	1.053077e+03	3.465232e+02	8.601542e+01	1.339412e+02	1.613842e+02	1.877901e+02	1.376434e+02	-3.234990e+01	-2.651364e+00	8.866703e+01	1.290034e+02	1.183655e+02	1.557571e+01	4.937858e+00	-4.805118e+01	3.852031e+01	1.228638e+02	1.221983e+02
1.180000e+02	1.080924e+03	3.019678e+02	5.425609e+01	1.028285e+02	1.520185e+02	1.641956e+02	1.291344e+02	-3.891471e+01	-1.424697e+01	6.850331e+01	1.072361e+02	9.317102e+01	9.657517e+00	-4.407581e+00	-4.716645e+01	3.344195e+01	1.185765e+02	1.326185e+02
1.190000e+02	1.106484e+03	2.638548e+02	2.448769e+01	7.468010e+01	1.476515e+02	1.437589e+02	1.242193e+02	-4.491949e+01	-2.755652e+01	5.204445e+01	8.338091e+01	6.940741e+01	5.272720e+00	-8.700736e+00	-4.137165e+01	3.250464e+01	1.151468e+02	1.438097e+02
1.200000e+02	1.128687e+03	2.361831e+02	-1.884257e-01	5.178257e+01	1.484875e+02	1.293482e+02	1.231229e+02	-5.002526e+01	-4.165380e+01	4.146560e+01	6.001877e+01	4.983706e+01	1.945539e+00	-8.236101e+00	-3.136183e+01	3.524005e+01	1.132475e+02	1.547875e+02
1.210000e+02	1.148181e+03	2.220898e+02	-1.684278e+01	3.619651e+01	1.537773e+02	1.237319e+02	1.260762e+02	-5.428329e+01	-5.542068e+01	3.857810e+01	4.030848e+01	3.744072e+01	-1.244204e+00	-4.111846e+00	-1.854154e+01	4.092219e+01	1.128552e+02	1.643849e+02
1.220000e+02	1.167511e+03	2.240262e+02	-2.286298e+01	2.974303e+01	1.623198e+02	1.291901e+02	1.334989e+02	-5.786066e+01	-6.748508e+01	4.462228e+01	2.758078e+01	3.499787e+01	-5.254882e+00	2.162373e+00	-4.650107e+00	4.893094e+01	1.133890e+02	1.716128e+02
1.230000e+02	1.190460e+03	2.438825e+02	-1.613954e+01	3.393169e+01	1.730159e+02	1.470928e+02	1.460385e+02	-6.066766e+01	-7.622752e+01	6.008812e+01	2.478839e+01	4.452826e+01	-1.059669e+01	9.143395e+00	8.647057e+00	5.903368e+01	1.139825e+02	1.759806e+02
1.240000e+02	1.220649e+03	2.828570e+02	4.651161e+00	4.974017e+01	1.852346e+02	1.775338e+02	1.644075e+02	-6.206716e+01	-7.991264e+01	8.456393e+01	3.391276e+01	6.671842e+01	-1.697846e+01	1.582748e+01	2.008163e+01	7.143756e+01	1.137973e+02	1.776596e+02
1.250000e+02	1.259786e+03	3.409478e+02	3.963522e+01	7.721554e+01	1.988220e+02	2.190961e+02	1.890418e+02	-6.083969e+01	-7.697121e+01	1.166065e+02	5.543236e+01	1.004749e+02	-2.325974e+01	2.178321e+01	2.895695e+01	8.655227e+01	1.122699e+02	1.774009e+02
1.260000e+02	1.306200e+03	4.161709e+02	8.727293e+01	1.150092e+02	2.137607e+02	2.688066e+02	2.196841e+02	-5.548247e+01	-6.639717e+01	1.536702e+02	8.797322e+01	1.427554e+02	-2.774664e+01	2.703598e+01	3.517139e+01	1.045478e+02	1.092131e+02	1.762084e+02
1.270000e+02	1.354306e+03	5.038643e+02	1.440395e+02	1.600924e+02	2.296847e+02	3.223268e+02	2.550556e+02	-4.476675e+01	-4.814771e+01	1.921873e+02	1.282770e+02	1.888062e+02	-2.871430e+01	3.181548e+01	3.912484e+01	1.249163e+02	1.047686e+02	1.748907e+02
1.280000e+02	1.395393e+03	5.965709e+02	2.045208e+02	2.079109e+02	2.455455e+02	3.744059e+02	2.927738e+02	-2.833509e+01	-2.338093e+01	2.279018e+02	1.715907e+02	2.328557e+02	-2.494548e+01	3.632021e+01	4.155036e+01	1.462700e+02	9.927563e+01	1.736984e+02
1.290000e+02	1.419677e+03	6.848419e+02	2.620960e+02	2.530773e+02	2.596531e+02	4.195714e+02	3.295950e+02	-7.067746e+00	5.617197e+00	2.564789e+02	2.124742e+02	2.691636e+02	-1.608705e+01	4.060306e+01	4.330870e+01	1.665029e+02	9.315021e+01	1.722370e+02
1.300000e+02	1.419036e+03	7.589166e+02	3.101442e+02	2.904459e+02	2.701077e+02	4.529488e+02	3.619312e+02	1.697338e+01	3.586011e+01	2.742841e+02	2.458588e+02	2.931706e+02	-2.725401e+00	4.458710e+01	4.518164e+01	1.832670e+02	8.684060e+01	1.697165e+02
1.310000e+02	1.389529e+03	8.107826e+02	3.434467e+02	3.162114e+02	2.754274e+02	4.710236e+02	3.864690e+02	4.103258e+01	6.433172e+01	2.791150e+02	2.680619e+02	3.024139e+02	1.379688e+01	4.814956e+01	4.770425e+01	1.945610e+02	8.086622e+01	1.654300e+02
1.320000e+02	1.332769e+03	8.358958e+02	3.593245e+02	3.286516e+02	2.750826e+02	4.721459e+02	4.006822e+02	6.239456e+01	8.866748e+01	2.706570e+02	2.774469e+02	2.969297e+02	3.172131e+01	5.120477e+01	5.107583e+01	1.991940e+02	7.588842e+01	1.592279e+02
1.330000e+02	1.255652e+03	8.339703e+02	3.581266e+02	3.283063e+02	2.697183e+02	4.566564e+02	4.030982e+02	7.907595e+01	1.075957e+02	2.505309e+02	2.745477e+02	2.790505e+02	4.925524e+01	5.375856e+01	5.517237e+01	1.969733e+02	7.274474e+01	1.517628e+02
1.340000e+02	1.168522e+03	8.086735e+02	3.429453e+02	3.176323e+02	2.610213e+02	4.266535e+02	3.933242e+02	9.022441e+01	1.209987e+02	2.219466e+02	2.616836e+02	2.527207e+02	6.491106e+01	5.594857e+01	5.965196e+01	1.886179e+02	7.240330e+01	1.443982e+02
1.350000e+02	1.082501e+03	7.665106e+02	3.187215e+02	3.003475e+02	2.513516e+02	3.855322e+02	3.719489e+02	9.612813e+01	1.296266e+02	1.890948e+02	2.422610e+02	2.225932e+02	7.775395e+01	5.808637e+01	6.410944e+01	1.755120e+02	7.583960e+01	1.388472e+02
1.360000e+02	1.006936e+03	7.153964e+02	2.910763e+02	2.806892e+02	2.433047e+02	3.374542e+02	3.404458e+02	9.791007e+01	1.346371e+02	1.564391e+02	2.200087e+02	1.931661e+02	8.752280e+01	6.068036e+01	6.821694e+01	1.594311e+02	8.387374e+01	1.367176e+02
1.370000e+02	9.477975e+02	6.633069e+02	2.651905e+02	2.627016e+02	2.393122e+02	2.868280e+02	3.011027e+02	9.708003e+01	1.371661e+02	1.280242e+02	1.983185e+02	1.681103e+02	9.459105e+01	6.438291e+01	7.179238e+01	1.422992e+02	9.701321e+01	1.391475e+02
1.380000e+02	9.073731e+02	6.171349e+02	2.449166e+02	2.495623e+02	2.412888e+02	2.377912e+02	2.568863e+02	9.510914e+01	1.380540e+02	1.068624e+02	1.797430e+02	1.498073e+02	9.975467e+01	6.981904e+01	7.477011e+01	1.259577e+02	1.153314e+02	1.466283e+02
1.390000e+02	8.850478e+02	5.816917e+02	2.321757e+02	2.429535e+02	2.502965e+02	1.936566e+02	2.111219e+02	9.311361e+01	1.377375e+02	9.443791e+01	1.656279e+02	1.390618e+02	1.038913e+02	7.732525e+01	7.709394e+01	1.119035e+02	1.383934e+02	1.590049e+02
1.400000e+02	8.785886e+02	5.588474e+02	2.266446e+02	2.425929e+02	2.662470e+02	1.563594e+02	1.669686e+02	9.165795e+01	1.362398e+02	9.040458e+01	1.558773e+02	1.349864e+02	1.076061e+02	8.671518e+01	7.859426e+01	1.010140e+02	1.652334e+02	1.755718e+02
1.410000e+02	8.853146e+02	5.470094e+02	2.257874e+02	2.461385e+02	2.877466e+02	1.260635e+02	1.268325e+02	9.066129e+01	1.331979e+02	9.258928e+01	1.489140e+02	1.351258e+02	1.110122e+02	9.722398e+01	7.892704e+01	9.335853e+01	1.943885e+02	1.951843e+02
1.420000e+02	9.027673e+02	5.412823e+02	2.253184e+02	2.496597e+02	3.122156e+02	1.011401e+02	9.196807e+01	8.941013e+01	1.279251e+02	9.739298e+01	1.419395e+02	1.359079e+02	1.137512e+02	1.077197e+02	7.763120e+01	8.822119e+01	2.239948e+02	2.163454e+02
1.430000e+02	9.288452e+02	5.345594e+02	2.201385e+02	2.486725e+02	3.363334e+02	7.866822e+01	6.247243e+01	8.670714e+01	1.195562e+02	1.005820e+02	1.315453e+02	1.334310e+02	1.152408e+02	1.171265e+02	7.430592e+01	8.438639e+01	2.519474e+02	2.372782e+02
1.440000e+02	9.616429e+02	5.194561e+02	2.056296e+02	2.394679e+02	3.567164e+02	5.542253e+01	3.771349e+01	8.117859e+01	1.073154e+02	9.831390e+01	1.146022e+02	1.244506e+02	1.150165e+02	1.248650e+02	6.884499e+01	8.060505e+01	2.761118e+02	2.560241e+02
1.450000e+02	9.993109e+02	4.906091e+02	1.790118e+02	2.202865e+02	3.706196e+02	2.910305e+01	1.702722e+01	7.171128e+01	9.088461e+01	8.812690e+01	8.921471e+01	1.073001e+02	1.129857e+02	1.310712e+02	6.162235e+01	7.605124e+01	2.945688e+02	2.706066e+02
1.460000e+02	1.040147e+03	4.466341e+02	1.403639e+02	1.919185e+02	3.764435e+02	-5.717261e-01	4.007312e-01	5.791716e+01	7.076042e+01	6.960319e+01	5.545967e+01	8.244631e+01	1.094715e+02	1.364582e+02	5.352836e+01	7.057580e+01	3.058682e+02	2.792743e+02
1.470000e+02	1.082913e+03	3.910828e+02	9.295396e+01	1.575409e+02	3.739279e+02	-3.128787e+01	-1.112959e+01	4.046918e+01	4.844098e+01	4.451271e+01	1.566358e+01	5.248438e+01	1.050559e+02	1.418767e+02	4.581187e+01	6.467111e+01	3.092573e+02	2.807985e+02
1.480000e+02	1.127204e+03	3.320375e+02	4.270575e+01	1.219092e+02	3.640516e+02	-5.831508e+01	-1.550903e+01	2.115100e+01	2.629923e+01	1.640626e+01	-2.590090e+01	2.155435e+01	1.003544e+02	1.478096e+02	3.976739e+01	5.921241e+01	3.048397e+02	2.747485e+02
1.490000e+02	1.173592e+03	2.804053e+02	-3.112335e+00	9.023695e+01	3.487594e+02	-7.545510e+01	-1.009944e+01	2.536604e+00	7.099281e+00	-1.021188e+01	-6.385152e+01	-5.649331e+00	9.588595e+01	1.540881e+02	3.637995e+01	5.514385e+01	2.936160e+02	2.616445e+02
1.500000e+02	1.223399e+03	2.473777e+02	-3.763969e+01	6.714389e+01	3.306465e+02	-7.652937e+01	7.644052e+00	-1.265224e+01	-6.741030e+00	-3.089893e+01	-9.286450e+01	-2.498784e+01	9.213158e+01	1.600081e+02	3.606698e+01	5.327452e+01	2.773724e+02	2.429042e+02
1.510000e+02	1.278057e+03	2.417830e+02	-5.611907e+01	5.594227e+01	3.126808e+02	-5.699811e+01	3.947279e+01	-2.231745e+01	-1.390106e+01	-4.221830e+01	-1.088707e+02	-3.380201e+01	8.974433e+01	1.648128e+02	3.862017e+01	5.425260e+01	2.584284e+02	2.205651e+02
1.520000e+02	1.338262e+03	2.680803e+02	-5.702402e+01	5.834735e+01	2.979613e+02	-1.525546e+01	8.580314e+01	-2.560624e+01	-1.462681e+01	-4.239752e+01	-1.099564e+02	-3.141819e+01	8.976578e+01	1.683038e+02	4.336494e+01	5.866104e+01	2.393004e+02	1.968616e+02
1.530000e+02	1.403168e+03	3.255108e+02	-4.227108e+01	7.453890e+01	2.894611e+02	4.674818e+01	1.454193e+02	-2.313413e+01	-1.069971e+01	-3.157171e+01	-9.672199e+01	-1.913735e+01	9.367667e+01	1.712610e+02	4.945929e+01	6.709931e+01	2.223619e+02	1.738040e+02
1.540000e+02	1.469924e+03	4.085052e+02	-1.647516e+01	1.034169e+02	2.896972e+02	1.236852e+02	2.154079e+02	-1.671350e+01	-4.878518e+00	-1.159700e+01	-7.201134e+01	2.379547e-01	1.031795e+02	1.754284e+02	5.619509e+01	8.012561e+01	2.095717e+02	1.529088e+02
1.550000e+02	1.533729e+03	5.080291e+02	1.445329e+01	1.428946e+02	3.003216e+02	2.077216e+02	2.912761e+02	-8.702000e+00	-1.548445e-02	1.446840e+01	-4.012906e+01	2.315494e+01	1.197404e+02	1.830239e+02	6.317275e+01	9.802273e+01	2.022990e+02	1.351595e+02
1.560000e+02	1.588456e+03	6.133266e+02	4.484330e+01	1.901339e+02	3.217076e+02	2.898113e+02	3.672425e+02	-1.248465e+00	1.806288e+00	4.303664e+01	-5.821941e+00	4.609148e+01	1.440432e+02	1.959561e+02	7.029032e+01	1.204678e+02	2.012402e+02	1.211676e+02
1.570000e+02	1.627774e+03	7.135707e+02	7.039989e+01	2.417119e+02	3.526748e+02	3.611101e+02	4.367617e+02	4.257899e+00	-2.157812e-01	7.061530e+01	2.664297e+01	6.614177e+01	1.755710e+02	2.150691e+02	7.758189e+01	1.462667e+02	2.064086e+02	1.114135e+02
1.580000e+02	1.646519e+03	7.991675e+02	8.863398e+01	2.937795e+02	3.905017e+02	4.142652e+02	4.933452e+02	7.348665e+00	-5.601028e+00	9.423465e+01	5.405322e+01	8.128517e+01	2.124953e+02	2.397265e+02	8.500634e+01	1.733144e+02	2.171879e+02	1.064167e+02
1.590000e+02	1.641947e+03	8.626934e+02	9.861404e+01	3.422902e+02	4.312947e+02	4.444123e+02	5.316386e+02	8.259233e+00	-1.301533e+01	1.116290e+02	7.440293e+01	9.035472e+01	2.519364e+02	2.678874e+02	9.229528e+01	1.988551e+02	2.324405e+02	1.067248e+02
1.600000e+02	1.614471e+03	8.995243e+02	1.003462e+02	3.833442e+02	4.706412e+02	4.497692e+02	5.485226e+02	7.512538e+00	-2.088780e+01	1.212336e+02	8.672589e+01	9.283357e+01	2.905114e+02	2.966183e+02	9.892313e+01	2.199867e+02	2.506555e+02	1.127011e+02
1.610000e+02	1.567552e+03	9.081584e+02	9.418241e+01	4.136218e+02	5.043535e+02	4.317450e+02	5.438700e+02	5.536983e+00	-2.794161e+01	1.221237e+02	9.081296e+01	8.864541e+01	3.249770e+02	3.228087e+02	1.041972e+02	2.342485e+02	2.701061e+02	1.241909e+02
1.620000e+02	1.506735e+03	8.901510e+02	8.054401e+01	4.308149e+02	5.290797e+02	3.945406e+02	5.206202e+02	2.484422e+00	-3.347077e+01	1.140145e+02	8.699954e+01	7.805958e+01	3.527558e+02	3.438152e+02	1.074200e+02	2.400939e+02	2.889871e+02	1.402173e+02
1.630000e+02	1.438177e+03	8.496095e+02	6.001537e+01	4.339447e+02	5.426413e+02	3.443167e+02	4.840631e+02	-1.719476e+00	-3.734980e+01	9.736486e+01	7.610275e+01	6.173484e+01	3.722101e+02	3.578417e+02	1.080633e+02	2.371111e+02	3.055314e+02	1.588695e+02
1.640000e+02	1.367226e+03	7.923291e+02	3.365003e+01	4.234735e+02	5.440857e+02	2.881190e+02	4.405516e+02	-7.179532e+00	-3.987660e+01	7.352634e+01	5.946370e+01	4.082954e+01	3.826441e+02	3.640095e+02	1.059062e+02	2.259587e+02	3.181281e+02	1.774760e+02
1.650000e+02	1.297633e+03	7.247897e+02	3.229968e+00	4.011735e+02	5.335444e+02	2.328180e+02	3.961029e+02	-1.382795e+01	-4.157360e+01	4.480330e+01	3.897332e+01	1.705787e+01	3.841156e+02	3.621999e+02	1.011057e+02	2.080880e+02	3.254575e+02	1.930405e+02
1.660000e+02	1.231649e+03	6.532533e+02	-2.873916e+01	3.697635e+02	5.119962e+02	1.842811e+02	3.553717e+02	-2.132705e+01	-4.302474e+01	1.428535e+01	1.695918e+01	-7.412163e+00	3.771756e+02	3.528041e+02	9.418171e+01	1.853757e+02	3.266215e+02	2.028012e+02
1.670000e+02	1.170816e+03	5.830864e+02	-5.937772e+01	3.323723e+02	4.809884e+02	1.468566e+02	3.212664e+02	-2.912082e+01	-4.475924e+01	-1.461867e+01	-4.130045e+00	-3.025697e+01	3.626292e+02	3.365022e+02	8.590847e+01	1.597909e+02	3.211984e+02	2.047313e+02
1.680000e+02	1.116977e+03	5.182718e+02	-8.605057e+01	2.919188e+02	4.423294e+02	1.230979e+02	2.951624e+02	-3.660250e+01	-4.715613e+01	-3.889459e+01	-2.222261e+01	-4.944815e+01	3.413669e+02	3.141412e+02	7.712975e+01	1.331696e+02	3.091606e+02	1.978442e+02
1.690000e+02	1.072972e+03	4.610087e+02	-1.070632e+02	2.505329e+02	3.977783e+02	1.135809e+02	2.774193e+02	-4.331602e+01	-5.035104e+01	-5.671232e+01	-3.620672e+01	-6.374730e+01	3.142802e+02	2.867395e+02	6.853870e+01	1.071258e+02	2.906532e+02	1.822740e+02
1.700000e+02	1.042690e+03	4.113809e+02	-1.222019e+02	2.091591e+02	3.488083e+02	1.167326e+02	2.678512e+02	-4.909840e+01	-5.416061e+01	-6.804140e+01	-4.644183e+01	-7.310361e+01	2.822627e+02	2.556009e+02	6.048839e+01	8.307677e+01	2.657322e+02	1.591938e+02
1.710000e+02	1.030495e+03	3.672458e+02	-1.329129e+02	1.674713e+02	2.965522e+02	1.287609e+02	2.659387e+02	-5.409870e+01	-5.806783e+01	-7.484511e+01	-5.500648e+01	-7.881428e+01	2.462856e+02	2.224777e+02	5.289812e+01	6.233231e+01	2.342204e+02	1.306602e+02
1.720000e+02	1.040308e+03	3.246047e+02	-1.420031e+02	1.241721e+02	2.419882e+02	1.439226e+02	2.707931e+02	-5.866113e+01	-6.130670e+01	-8.069650e+01	-6.549790e+01	-8.334214e+01	2.075143e+02	1.896700e+02	4.529604e+01	4.617348e+01	1.958152e+02	9.941863e+01
1.730000e+02	1.074694e+03	2.786348e+02	-1.528725e+02	7.764405e+01	1.863119e+02	1.553678e+02	2.810436e+02	-6.311597e+01	-6.304539e+01	-8.982716e+01	-8.227775e+01	-8.975666e+01	1.674008e+02	1.599217e+02	3.699684e+01	3.584816e+01	1.504641e+02	6.863894e+01
1.740000e+02	1.134220e+03	2.252850e+02	-1.684370e+02	2.679511e+01	1.313131e+02	1.565843e+02	2.948404e+02	-6.755923e+01	-6.261293e+01	-1.058241e+02	-1.092268e+02	-1.008779e+02	1.276732e+02	1.360219e+02	2.736843e+01	3.243142e+01	9.888208e+01	4.152277e+01
1.750000e+02	1.217163e+03	1.629832e+02	-1.900454e+02	-2.815706e+01	7.952938e+01	1.431346e+02	3.100496e+02	-7.171004e+01	-5.968127e+01	-1.303642e+02	-1.482981e+02	-1.183356e+02	9.017877e+01	1.201410e+02	1.610973e+01	3.655014e+01	4.297952e+01	2.078155e+01
1.760000e+02	1.319508e+03	9.378491e+01	-2.167666e+02	-8.525107e+01	3.401086e+01	1.141028e+02	3.245757e+02	-7.491271e+01	-5.432901e+01	-1.624377e+02	-1.983455e+02	-1.418542e+02	5.660344e+01	1.130944e+02	3.449636e+00	4.803449e+01	-1.402346e+01	8.077568e+00
1.770000e+02	1.435123e+03	2.336689e+01	-2.453748e+02	-1.409064e+02	-2.302339e+00	7.264470e+01	3.366578e+02	-7.630756e+01	-4.697543e+01	-1.983996e+02	-2.547345e+02	-1.690676e+02	2.816165e+01	1.138281e+02	-9.807938e+00	6.561283e+01	-6.791514e+01	3.598156e+00
1.780000e+02	1.556081e+03	-4.033578e+01	-2.711526e+02	-1.906379e+02	-2.740843e+01	2.531840e+01	3.450138e+02	-7.513776e+01	-3.824533e+01	-2.329075e+02	-3.100336e+02	-1.960152e+02	5.377878e+00	1.193957e+02	-2.242627e+01	8.678712e+01	-1.141957e+02	5.932403e+00
1.790000e+02	1.673152e+03	-8.947697e+01	-2.893111e+02	-2.301676e+02	-4.096937e+01	-1.965054e+01	3.488053e+02	-7.109859e+01	-2.885619e+01	-2.604552e+02	-3.556905e+02	-2.182129e+02	-1.195411e+01	1.255230e+02	-3.303716e+01	1.079999e+02	-1.489697e+02	1.233444e+01
1.800000e+02	1.776541e+03	-1.187793e+02	-2.965310e+02	-2.565646e+02	-4.462212e+01	-5.457471e+01	3.475090e+02	-6.459046e+01	-1.958116e+01	-2.769502e+02	-3.841817e+02	-2.319410e+02	-2.462293e+01	1.276172e+02	-4.051126e+01	1.251328e+02	-1.697555e+02	1.932761e+01
1.810000e+02	1.856932e+03	-1.271553e+02	-2.920151e+02	-2.690015e+02	-4.168951e+01	-7.420735e+01	3.408280e+02	-5.673712e+01	-1.125660e+01	-2.807588e+02	-3.909014e+02	-2.352783e+02	-3.372238e+01	1.219001e+02	-4.427211e+01	1.342758e+02	-1.759661e+02	2.349007e+01
1.820000e+02	1.906766e+03	-1.177874e+02	-2.776060e+02	-2.688427e+02	-3.631827e+01	-7.672965e+01	3.287486e+02	-4.910127e+01	-4.737241e+00	-2.728691e+02	-3.751557e+02	-2.285051e+02	-4.033679e+01	1.063133e+02	-4.444213e+01	1.326085e+02	-1.689278e+02	2.221028e+01
1.830000e+02	1.921588e+03	-9.663231e+01	-2.569208e+02	-2.590290e+02	-3.229707e+01	-6.361798e+01	3.117519e+02	-4.315997e+01	-7.147771e-01	-2.562063e+02	-3.400001e+02	-2.137611e+02	-4.526699e+01	8.097159e+01	-4.177045e+01	1.191629e+02	-1.514611e+02	1.421987e+01
1.840000e+02	1.901154e+03	-6.999767e+01	-2.338860e+02	-2.429922e+02	-3.195414e+01	-3.862850e+01	2.910818e+02	-3.973571e+01	5.876074e-01	-2.344738e+02	-2.911221e+02	-1.941505e+02	-4.884085e+01	4.813040e+01	-3.737784e+01	9.523597e+01	-1.271913e+02	-2.181206e-01
1.850000e+02	1.849976e+03	-4.223968e+01	-2.113235e+02	-2.235156e+02	-3.553412e+01	-6.413027e+00	2.689077e+02	-3.863671e+01	-2.898884e-01	-2.110338e+02	-2.352893e+02	-1.726869e+02	-5.082777e+01	1.177427e+01	-3.242154e+01	6.428645e+01	-9.982175e+01	-1.949411e+01
1.860000e+02	1.777040e+03	-1.454804e+01	-1.901852e+02	-2.019657e+02	-4.129353e+01	2.870166e+01	2.482198e+02	-3.869394e+01	-1.953647e+00	-1.882317e+02	-1.789299e+02	-1.514914e+02	-5.047353e+01	-2.303529e+01	-2.780150e+01	3.128604e+01	-7.258072e+01	-4.114503e+01
1.870000e+02	1.694598e+03	1.473418e+01	-1.697113e+02	-1.781759e+02	-4.628809e+01	6.343383e+01	2.323874e+02	-3.821246e+01	-2.409264e+00	-1.673021e+02	-1.272131e+02	-1.314988e+02	-4.667644e+01	-5.096234e+01	-2.399578e+01	1.651198e+00	-4.794036e+01	-6.251205e+01
1.880000e+02	1.616181e+03	4.850473e+01	-1.483502e+02	-1.509997e+02	-4.756124e+01	9.570814e+01	2.244355e+02	-3.566549e+01	3.598215e-01	-1.487101e+02	-8.369558e+01	-1.126847e+02	-3.831440e+01	-6.730373e+01	-2.105033e+01	-1.998301e+01	-2.757920e+01	-8.137131e+01
1.890000e+02	1.554189e+03	8.880487e+01	-1.249515e+02	-1.192916e+02	-4.329465e+01	1.244246e+02	2.262278e+02	-3.034836e+01	7.676526e+00	-1.326280e+02	-5.036208e+01	-9.460311e+01	-2.468818e+01	-6.892935e+01	-1.869283e+01	-3.082508e+01	-1.247041e+01	-9.635126e+01
1.900000e+02	1.517565e+03	1.351798e+02	-9.966033e+01	-8.291213e+01	-3.351279e+01	1.490919e+02	2.378158e+02	-2.272831e+01	1.960197e+01	-1.192622e+02	-2.781825e+01	-7.693200e+01	-5.980025e+00	-5.509387e+01	-1.651276e+01	-3.053843e+01	-2.975070e+00	-1.070219e+02
1.910000e+02	1.510074e+03	1.841731e+02	-7.413526e+01	-4.334948e+01	-2.012607e+01	1.695344e+02	2.571971e+02	-1.435676e+01	3.476576e+01	-1.089009e+02	-1.547190e+01	-5.977849e+01	1.642890e+01	-2.787775e+01	-1.415069e+01	-2.123828e+01	1.111635e+00	-1.136680e+02
1.920000e+02	1.529592e+03	2.301007e+02	-5.104714e+01	-3.719204e+00	-6.357655e+00	1.857647e+02	2.806213e+02	-7.384357e+00	5.069439e+01	-1.017413e+02	-1.168940e+01	-4.366278e+01	3.994329e+01	7.969870e+00	-1.145331e+01	-6.884766e+00	5.266477e-01	-1.168896e+02
1.930000e+02	1.568693e+03	2.667181e+02	-3.313840e+01	3.184854e+01	4.189156e+00	1.979899e+02	3.034163e+02	-3.858702e+00	6.453946e+01	-9.767758e+01	-1.401878e+01	-2.927971e+01	6.112783e+01	4.586691e+01	-8.565434e+00	7.748680e+00	-3.559889e+00	-1.172416e+02
1.940000e+02	1.616496e+03	2.890993e+02	-2.227227e+01	5.919000e+01	8.482306e+00	2.066660e+02	3.211283e+02	-5.045069e+00	7.395131e+01	-9.622326e+01	-1.956857e+01	-1.722723e+01	7.641674e+01	7.875813e+01	-5.945017e+00	1.823888e+01	-9.756859e+00	-1.150822e+02
1.950000e+02	1.661485e+03	2.950517e+02	-1.884008e+01	7.509224e+01	4.742347e+00	2.125133e+02	3.306394e+02	-1.098452e+01	7.779626e+01	-9.663599e+01	-2.553068e+01	-7.855576e+00	8.294735e+01	1.006225e+02	-4.305143e+00	2.149000e+01	-1.674789e+01	-1.106706e+02
1.960000e+02	1.694649e+03	2.856422e+02	-2.168721e+01	7.794152e+01	-7.302812e+00	2.164557e+02	3.309028e+02	-2.041583e+01	7.648949e+01	-9.817636e+01	-2.971520e+01	-1.271374e+00	7.921252e+01	1.076564e+02	-4.505694e+00	1.627067e+01	-2.357368e+01	-1.044037e+02
1.970000e+02	1.712106e+03	2.647515e+02	-2.849428e+01	6.784098e+01	-2.660436e+01	2.194887e+02	3.230437e+02	-3.107324e+01	7.186740e+01	-1.003614e+02	-3.091283e+01	2.578982e+00	6.526179e+01	9.875370e+01	-7.425960e+00	3.193577e+00	-2.979812e+01	-9.701667e+01
1.980000e+02	1.716383e+03	2.378663e+02	-3.641559e+01	4.620605e+01	-5.132335e+01	2.225107e+02	3.097959e+02	-4.026500e+01	6.667913e+01	-1.030944e+02	-2.895920e+01	3.849469e+00	4.235657e+01	7.516531e+01	-1.384063e+01	-1.580942e+01	-3.551414e+01	-8.961030e+01
1.990000e+02	1.715831e+03	2.105032e+02	-4.276366e+01	1.503678e+01	-7.953080e+01	2.261620e+02	2.944895e+02	-4.556660e+01	6.387224e+01	-1.066357e+02	-2.450892e+01	2.803035e+00	1.223396e+01	3.954595e+01	-2.430161e+01	-3.830837e+01	-4.122268e+01	-8.349012e+01
2.000000e+02	1.722227e+03	1.867309e+02	-4.558904e+01	-2.381276e+01	-1.098490e+02	2.307184e+02	2.799762e+02	-4.544116e+01	6.586174e+01	-1.114506e+02	-1.865200e+01	-1.477568e-01	-2.366456e+01	-5.160346e+00	-3.901477e+01	-6.219293e+01	-4.765639e+01	-7.990262e+01
2.010000e+02	1.747157e+03	1.682152e+02	-4.406881e+01	-6.904137e+01	-1.417933e+02	2.360784e+02	2.678790e+02	-3.963087e+01	7.393038e+01	-1.179991e+02	-1.254586e+01	-4.437806e+00	-6.460292e+01	-5.649498e+01	-5.770843e+01	-8.619866e+01	-5.559511e+01	-7.977781e+01
2.020000e+02	1.798259e+03	1.540777e+02	-3.864870e+01	-1.197820e+02	-1.756390e+02	2.418578e+02	2.583928e+02	-2.923207e+01	8.785929e+01	-1.265079e+02	-7.179755e+00	-9.416479e+00	-1.103647e+02	-1.126016e+02	-7.951787e+01	-1.099731e+02	-6.566650e+01	-8.353601e+01
2.030000e+02	1.876441e+03	1.416165e+02	-3.089625e+01	-1.749856e+02	-2.118021e+02	2.475594e+02	2.506158e+02	-1.644860e+01	1.058596e+02	-1.367558e+02	-3.283641e+00	-1.444748e+01	-1.605373e+02	-1.717014e+02	-1.029385e+02	-1.336996e+02	-7.810320e+01	-9.095794e+01
2.040000e+02	1.974983e+03	1.276484e+02	-2.305886e+01	-2.325917e+02	-2.499514e+02	2.527437e+02	2.431793e+02	-4.090772e+00	1.248564e+02	-1.479153e+02	-1.313003e+00	-1.896793e+01	-2.136229e+02	-2.312782e+02	-1.259074e+02	-1.574798e+02	-9.247226e+01	-1.011106e+02
2.050000e+02	2.080841e+03	1.099921e+02	-1.740096e+01	-2.889294e+02	-2.882507e+02	2.571113e+02	2.348686e+02	5.062462e+00	1.411317e+02	-1.585327e+02	-1.429408e+00	-2.246325e+01	-2.664654e+02	-2.874997e+02	-1.460481e+02	-1.807756e+02	-1.074758e+02	-1.123667e+02
2.060000e+02	2.177813e+03	8.853969e+01	-1.549373e+01	-3.387631e+02	-3.231517e+02	2.604582e+02	2.250028e+02	8.895629e+00	1.512335e+02	-1.667272e+02	-3.444909e+00	-2.438917e+01	-3.143734e+02	-3.353182e+02	-1.610569e+02	-2.021829e+02	-1.209696e+02	-1.225913e+02
2.070000e+02	2.250643e+03	6.552303e+01	-1.769059e+01	-3.761459e+02	-3.499619e+02	2.625516e+02	2.135099e+02	6.439038e+00	1.529336e+02	-1.706242e+02	-6.761857e+00	-2.412943e+01	-3.520163e+02	-3.693844e+02	-1.691509e+02	-2.196662e+02	-1.302965e+02	-1.295335e+02
2.080000e+02	2.288811e+03	4.491334e+01	-2.298763e+01	-3.958767e+02	-3.640667e+02	2.630525e+02	2.007901e+02	-1.918526e+00	1.459279e+02	-1.689155e+02	-1.037233e+01	-2.106890e+01	-3.748080e+02	-3.855051e+02	-1.694528e+02	-2.311783e+02	-1.328892e+02	-1.313543e+02
2.090000e+02	2.288872e+03	3.123790e+01	-2.933829e+01	-3.950409e+02	-3.623661e+02	2.616058e+02	1.875262e+02	-1.455049e+01	1.319987e+02	-1.613370e+02	-1.296686e+01	-1.478760e+01	-3.802539e+02	-3.820751e+02	-1.621880e+02	-2.354170e+02	-1.269498e+02	-1.271087e+02
2.100000e+02	2.254681e+03	2.828864e+01	-3.431790e+01	-3.740231e+02	-3.443509e+02	2.581142e+02	1.745584e+02	-2.902493e+01	1.145261e+02	-1.488440e+02	-1.315745e+01	-5.292760e+00	-3.687313e+02	-3.608671e+02	-1.486227e+02	-2.324004e+02	-1.119512e+02	-1.169849e+02
2.110000e+02	2.195558e+03	3.814679e+01	-3.590038e+01	-3.365776e+02	-3.123932e+02	2.530590e+02	1.628330e+02	-4.273204e+01	9.748206e+01	-1.333824e+02	-9.776332e+00	6.831852e+00	-3.434107e+02	-3.268028e+02	-1.307552e+02	-2.236090e+02	-8.878493e+01	-1.021996e+02
2.120000e+02	2.123161e+03	6.071837e+01	-3.307920e+01	-2.889373e+02	-2.711630e+02	2.476226e+02	1.533451e+02	-5.351976e+01	8.426004e+01	-1.173392e+02	-2.189780e+00	2.044074e+01	-3.093795e+02	-2.867492e+02	-1.108666e+02	-2.116175e+02	-5.954623e+01	-8.461369e+01
2.130000e+02	2.048176e+03	9.372574e+01	-2.614411e+01	-2.383361e+02	-2.264443e+02	2.434074e+02	1.469702e+02	-6.014147e+01	7.676419e+01	-1.029082e+02	9.434385e+00	3.399753e+01	-2.723352e+02	-2.477723e+02	-9.108320e+01	-1.993463e+02	-2.709877e+01	-6.625365e+01
2.140000e+02	1.977880e+03	1.329813e+02	-1.656499e+01	-1.915155e+02	-1.838200e+02	2.417326e+02	1.441537e+02	-6.238182e+01	7.507030e+01	-9.163521e+01	2.396041e+01	4.581698e+01	-2.373341e+02	-2.154777e+02	-7.308640e+01	-1.892152e+02	5.394416e+00	-4.893030e+01
2.150000e+02	1.915200e+03	1.728221e+02	-6.563747e+00	-1.537008e+02	-1.476514e+02	2.427471e+02	1.445321e+02	-6.084309e+01	7.772825e+01	-8.429194e+01	3.927068e+01	5.427947e+01	-2.079818e+02	-1.929730e+02	-5.802917e+01	-1.825080e+02	3.485575e+01	-3.404267e+01
2.160000e+02	1.859258e+03	2.067206e+02	1.471848e+00	-1.282383e+02	-1.205675e+02	2.447700e+02	1.466610e+02	-5.649926e+01	8.251998e+01	-8.104809e+01	5.244903e+01	5.797121e+01	-1.862108e+02	-1.806887e+02	-4.661760e+01	-1.791581e+02	5.858988e+01	-2.252795e+01
2.170000e+02	1.806954e+03	2.281567e+02	5.569126e+00	-1.167569e+02	-1.034285e+02	2.442529e+02	1.480356e+02	-5.020963e+01	8.733427e+01	-8.176512e+01	6.018139e+01	5.577883e+01	-1.725368e+02	-1.769393e+02	-3.924735e+01	-1.779835e+02	7.455421e+01	-1.485320e+01
2.180000e+02	1.754866e+03	2.317574e+02	4.613569e+00	-1.195255e+02	-9.558985e+01	2.365273e+02	1.455062e+02	-4.239392e+01	9.082180e+01	-8.620824e+01	5.934283e+01	4.700755e+01	-1.665338e+02	-1.788691e+02	-3.608178e+01	-1.772304e+02	8.163990e+01	-1.097442e+01
2.190000e+02	1.700831e+03	2.145101e+02	-1.432058e+00	-1.357013e+02	-9.527475e+01	2.171587e+02	1.360274e+02	-3.299985e+01	9.262779e+01	-9.405990e+01	4.767285e+01	3.156784e+01	-1.672696e+02	-1.833746e+02	-3.702007e+01	-1.751922e+02	7.991687e+01	-1.027240e+01
2.200000e+02	1.644768e+03	1.766863e+02	-1.156828e+01	-1.633474e+02	-9.995093e+01	1.834504e+02	1.175244e+02	-2.176812e+01	9.318835e+01	-1.047567e+02	2.438650e+01	1.019987e+01	-1.735476e+02	-1.877342e+02	-4.159215e+01	-1.706835e+02	7.073216e+01	-1.154149e+01
2.210000e+02	1.588616e+03	1.220973e+02	-2.404300e+01	-1.993250e+02	-1.066958e+02	1.355577e+02	8.958071e+01	-8.669084e+00	9.323652e+01	-1.172796e+02	-9.446046e+00	-1.537391e+01	-1.839512e+02	-1.898791e+02	-4.888181e+01	-1.632573e+02	5.656133e+01	-1.311117e+01
2.220000e+02	1.535575e+03	5.748641e+01	-3.681272e+01	-2.393085e+02	-1.125826e+02	7.682816e+01	5.370514e+01	5.693988e+00	9.324173e+01	-1.300546e+02	-5.088166e+01	-4.250672e+01	-1.968018e+02	-1.884268e+02	-5.758222e+01	-1.531782e+02	4.059543e+01	-1.312550e+01
2.230000e+02	1.489013e+03	-8.841834e+00	-4.807387e+01	-2.781579e+02	-1.151111e+02	1.327742e+01	1.308618e+01	1.991119e+01	9.299231e+01	-1.410663e+02	-9.549795e+01	-6.798511e+01	-2.101729e+02	-1.826600e+02	-6.622503e+01	-1.412580e+02	2.614696e+01	-9.934459e+00
2.240000e+02	1.451554e+03	-6.879170e+01	-5.673386e+01	-3.107265e+02	-1.126520e+02	-4.759394e+01	-2.807842e+01	3.192518e+01	9.145442e+01	-1.481884e+02	-1.381451e+02	-8.865912e+01	-2.220676e+02	-1.725815e+02	-7.352765e+01	-1.286732e+02	1.602135e+01	-2.500795e+00
2.250000e+02	1.424725e+03	-1.161486e+02	-6.268970e+01	-3.329420e+02	-1.048155e+02	-9.827767e+01	-6.546224e+01	3.949337e+01	8.694448e+01	-1.496343e+02	-1.739022e+02	-1.021832e+02	-2.307593e+02	-1.590401e+02	-7.872560e+01	-1.168191e+02	1.200380e+01	9.288295e+00
2.260000e+02	1.409279e+03	-1.476921e+02	-6.680889e+01	-3.428097e+02	-9.260107e+01	-1.326602e+02	-9.545653e+01	4.080950e+01	7.756893e+01	-1.443779e+02	-1.990131e+02	-1.076186e+02	-2.351918e+02	-1.437970e+02	-8.174248e+01	-1.071745e+02	1.457360e+01	2.450290e+01
2.270000e+02	1.405928e+03	-1.634571e+02	-7.057116e+01	-3.409274e+02	-7.819914e+01	-1.470844e+02	-1.157908e+02	3.509031e+01	6.182613e+01	-1.323974e+02	-2.115606e+02	-1.056617e+02	-2.352666e+02	-1.293675e+02	-8.311354e+01	-1.011040e+02	2.290510e+01	4.131014e+01
2.280000e+02	1.415943e+03	-1.661067e+02	-7.543444e+01	-3.302486e+02	-6.440379e+01	-1.409282e+02	-1.258295e+02	2.295231e+01	3.922504e+01	-1.146595e+02	-2.116966e+02	-9.838696e+01	-2.318626e+02	-1.185527e+02	-8.368840e+01	-9.956100e+01	3.515743e+01	5.738023e+01
2.290000e+02	1.441047e+03	-1.596563e+02	-8.211242e+01	-3.151177e+02	-5.375456e+01	-1.166529e+02	-1.265319e+02	6.470535e+00	1.075110e+01	-9.286353e+01	-2.013771e+02	-8.858318e+01	-2.265356e+02	-1.137414e+02	-8.423929e+01	-1.027429e+02	4.898850e+01	7.048698e+01
2.300000e+02	1.482404e+03	-1.480016e+02	-9.003903e+01	-2.999153e+02	-4.768325e+01	-7.933304e+01	-1.201203e+02	-1.110577e+01	-2.098498e+01	-6.905404e+01	-1.837130e+02	-7.893349e+01	-2.209827e+02	-1.162030e+02	-8.513871e+01	-1.098416e+02	6.215848e+01	7.914665e+01
2.310000e+02	1.539039e+03	-1.337692e+02	-9.728343e+01	-2.878167e+02	-4.599820e+01	-3.574670e+01	-1.095288e+02	-2.592668e+01	-5.202339e+01	-4.526001e+01	-1.621812e+02	-7.135696e+01	-2.164606e+02	-1.256361e+02	-8.623018e+01	-1.190425e+02	7.304435e+01	8.309136e+01
2.320000e+02	1.606490e+03	-1.178644e+02	-1.010359e+02	-2.801152e+02	-4.693321e+01	6.818527e+00	-9.773533e+01	-3.428359e+01	-7.774814e+01	-2.328774e+01	-1.399728e+02	-6.675252e+01	-2.133633e+02	-1.401428e+02	-8.692304e+01	-1.278420e+02	8.090871e+01	8.340235e+01
2.330000e+02	1.676575e+03	-9.979463e+01	-9.855097e+01	-2.762986e+02	-4.775412e+01	4.180361e+01	-8.710391e+01	-3.335229e+01	-9.384185e+01	-4.709125e+00	-1.196728e+02	-6.519886e+01	-2.111001e+02	-1.566260e+02	-8.644816e+01	-1.336171e+02	8.586269e+01	8.223549e+01
2.340000e+02	1.738702e+03	-7.851933e+01	-8.821153e+01	-2.747458e+02	-4.567233e+01	6.438825e+01	-7.889695e+01	-2.175728e+01	-9.723230e+01	9.020699e+00	-1.032893e+02	-6.645443e+01	-2.082914e+02	-1.714564e+02	-8.415895e+01	-1.342649e+02	8.859214e+01	8.221542e+01
2.350000e+02	1.782444e+03	-5.338475e+01	-7.028598e+01	-2.736693e+02	-3.869525e+01	7.205414e+01	-7.310124e+01	1.850160e-01	-8.674009e+01	1.645395e+01	-9.247989e+01	-7.047115e+01	-2.031979e+02	-1.811892e+02	-7.976629e+01	-1.287018e+02	9.000593e+01	8.568758e+01
2.360000e+02	1.800443e+03	-2.472431e+01	-4.704852e+01	-2.718825e+02	-2.610936e+01	6.462145e+01	-6.863482e+01	3.059957e+01	-6.323239e+01	1.618361e+01	-8.873682e+01	-7.764823e+01	-1.942337e+02	-1.831452e+02	-7.344242e+01	-1.170730e+02	9.096283e+01	9.405211e+01
2.370000e+02	1.790530e+03	6.089512e+00	-2.218833e+01	-2.691085e+02	-8.491295e+00	4.384428e+01	-6.386743e+01	6.651019e+01	-2.925918e+01	7.070461e+00	-9.334931e+01	-8.869863e+01	-1.804091e+02	-1.757585e+02	-6.578994e+01	-1.006415e+02	9.214926e+01	1.073573e+02
2.380000e+02	1.756290e+03	3.708781e+01	2.732038e-01	-2.658011e+02	1.264646e+01	1.276248e+01	-5.726016e+01	1.044812e+02	1.168326e+01	-1.141057e+01	-1.071273e+02	-1.042080e+02	-1.615920e+02	-1.586729e+02	-5.772027e+01	-8.143330e+01	9.407880e+01	1.242409e+02
2.390000e+02	1.706016e+03	6.638787e+01	1.714473e+01	-2.626814e+02	3.535557e+01	-2.498506e+01	-4.789091e+01	1.412711e+02	5.602164e+01	-3.887755e+01	-1.300529e+02	-1.241264e+02	-1.385538e+02	-1.326275e+02	-5.030542e+01	-6.178334e+01	9.713797e+01	1.422184e+02
2.400000e+02	1.650664e+03	9.280025e+01	2.688979e+01	-2.603100e+02	5.769601e+01	-6.575766e+01	-3.571714e+01	1.743501e+02	1.008659e+02	-7.397685e+01	-1.611011e+02	-1.474603e+02	-1.128484e+02	-9.920792e+01	-4.465304e+01	-4.393613e+01	1.016313e+02	1.582492e+02
2.410000e+02	1.601628e+03	1.161182e+02	2.987214e+01	-2.589436e+02	7.802300e+01	-1.063778e+02	-2.158834e+01	2.021846e+02	1.444765e+02	-1.146052e+02	-1.983777e+02	-1.723124e+02	-8.662990e+01	-6.056496e+01	-4.181756e+01	-2.981541e+01	1.078377e+02	1.694574e+02
2.420000e+02	1.568955e+03	1.369956e+02	2.803502e+01	-2.587146e+02	9.511517e+01	-1.444455e+02	-7.146755e+00	2.242450e+02	1.863290e+02	-1.582947e+02	-2.395063e+02	-1.962099e+02	-6.250340e+01	-1.920744e+01	-4.272116e+01	-2.099558e+01	1.161102e+02	1.738392e+02
2.430000e+02	1.560102e+03	1.564741e+02	2.423289e+01	-2.599363e+02	1.081860e+02	-1.784488e+02	5.248514e+00	2.407404e+02	2.267394e+02	-2.025072e+02	-2.819965e+02	-2.165073e+02	-4.342777e+01	2.206090e+01	-4.804187e+01	-1.880936e+01	1.269951e+02	1.707608e+02
2.440000e+02	1.579022e+03	1.753287e+02	2.149863e+01	-2.632293e+02	1.168120e+02	-2.075922e+02	1.257209e+01	2.521393e+02	2.661109e+02	-2.446129e+02	-3.233036e+02	-2.306404e+02	-3.258772e+01	6.007495e+01	-5.804732e+01	-2.444791e+01	1.412599e+02	1.610743e+02
2.450000e+02	1.625360e+03	1.934573e+02	2.245190e+01	-2.692700e+02	1.207950e+02	-2.313365e+02	1.131617e+01	2.586240e+02	3.040003e+02	-2.815489e+02	-3.605004e+02	-2.361717e+02	-3.309714e+01	9.123095e+01	-7.240341e+01	-3.889551e+01	1.596906e+02	1.467878e+02
2.460000e+02	1.693916e+03	2.095411e+02	2.891731e+01	-2.782220e+02	1.199950e+02	-2.488055e+02	-1.986397e+00	2.596974e+02	3.383529e+02	-3.094359e+02	-3.898058e+02	-2.307797e+02	-4.744128e+01	1.115843e+02	-9.003756e+01	-6.261601e+01	1.826112e+02	1.303919e+02
2.470000e+02	1.774888e+03	2.211700e+02	4.172670e+01	-2.891512e+02	1.142238e+02	-2.583686e+02	-2.982918e+01	2.541710e+02	3.653159e+02	-3.235893e+02	-4.064369e+02	-2.124438e+02	-7.670642e+01	1.172861e+02	-1.091508e+02	-9.504906e+01	2.092731e+02	1.141019e+02
2.480000e+02	1.855412e+03	2.255361e+02	6.068075e+01	-2.997756e+02	1.033264e+02	-2.577020e+02	-7.258302e+01	2.406429e+02	3.799129e+02	-3.192321e+02	-4.051708e+02	-1.799617e+02	-1.198131e+02	1.053955e+02	-1.274346e+02	-1.341123e+02	2.374388e+02	9.933204e+01
2.490000e+02	1.922427e+03	2.206452e+02	8.470623e+01	-3.067085e+02	8.753458e+01	-2.444189e+02	-1.275602e+02	2.183495e+02	3.775308e+02	-2.928243e+02	-3.816143e+02	-1.336428e+02	-1.730651e+02	7.490613e+01	-1.424699e+02	-1.759648e+02	2.634995e+02	8.661637e+01
2.500000e+02	1.966180e+03	2.067744e+02	1.122752e+02	-3.060568e+02	6.804297e+01	-2.170239e+02	-1.887714e+02	1.880479e+02	3.557569e+02	-2.434813e+02	-3.337051e+02	-7.577210e+01	-2.302843e+02	2.764857e+01	-1.522071e+02	-2.152279e+02	2.832708e+02	7.597450e+01
2.510000e+02	1.983107e+03	1.876988e+02	1.420771e+02	-2.940475e+02	4.757790e+01	-1.757159e+02	-2.476561e+02	1.525006e+02	3.158385e+02	-1.737611e+02	-2.627130e+02	-1.042301e+01	-2.836242e+02	-3.133411e+01	-1.553808e+02	-2.457004e+02	2.932782e+02	6.749739e+01
2.520000e+02	1.976857e+03	1.711113e+02	1.737636e+02	-2.674136e+02	3.062271e+01	-1.225959e+02	-2.947020e+02	1.162626e+02	2.630862e+02	-8.932228e+01	-1.731834e+02	5.750150e+01	-3.249150e+02	-9.422973e+01	-1.517312e+02	-2.614276e+02	2.920500e+02	6.182171e+01
2.530000e+02	1.956874e+03	1.677858e+02	2.084272e+02	-2.235384e+02	2.301022e+01	-6.115796e+01	-3.215038e+02	8.476924e+01	2.059352e+02	2.492326e+00	-7.179269e+01	1.236584e+02	-3.471968e+02	-1.517452e+02	-1.419707e+02	-2.578528e+02	2.808627e+02	6.023397e+01
2.540000e+02	1.934915e+03	1.893888e+02	2.484509e+02	-1.606188e+02	3.081254e+01	4.651241e+00	-3.226341e+02	6.303651e+01	1.539265e+02	9.452468e+01	3.433539e+01	1.854147e+02	-3.460337e+02	-1.949536e+02	-1.275197e+02	-2.327601e+02	2.635724e+02	6.434922e+01
2.550000e+02	1.920747e+03	2.453391e+02	2.965671e+02	-7.815691e+01	5.875869e+01	7.127547e+01	-2.967748e+02	5.444109e+01	1.153061e+02	1.812613e+02	1.390382e+02	2.421264e+02	-3.202835e+02	-2.171944e+02	-1.101180e+02	-1.867885e+02	2.455472e+02	7.552640e+01
2.560000e+02	1.918617e+03	3.395599e+02	3.543231e+02	2.214456e+01	1.086499e+02	1.358529e+02	-2.468452e+02	5.998104e+01	9.505777e+01	2.592655e+02	2.376413e+02	2.943425e+02	-2.721979e+02	-2.154958e+02	-9.144565e+01	-1.234322e+02	2.320823e+02	9.429624e+01
2.570000e+02	1.925776e+03	4.681691e+02	4.205068e+02	1.353905e+02	1.783046e+02	1.959021e+02	-1.792118e+02	7.818517e+01	9.396271e+01	3.265443e+02	3.265488e+02	3.423221e+02	-2.069314e+02	-1.911570e+02	-7.287315e+01	-4.856936e+01	2.268744e+02	1.200406e+02
2.580000e+02	1.933559e+03	6.189997e+02	4.902478e+02	2.529922e+02	2.614211e+02	2.487205e+02	-1.023199e+02	1.055873e+02	1.088581e+02	3.813897e+02	4.023923e+02	3.846609e+02	-1.316682e+02	-1.493984e+02	-5.538780e+01	3.034961e+01	2.310722e+02	1.510168e+02
2.590000e+02	1.930562e+03	7.733418e+02	5.553379e+02	3.632140e+02	3.484618e+02	2.910242e+02	-2.515772e+01	1.375335e+02	1.338555e+02	4.214825e+02	4.614514e+02	4.178050e+02	-5.459010e+01	-9.823546e+01	-3.965667e+01	1.053007e+02	2.431621e+02	1.846640e+02
2.600000e+02	1.906702e+03	9.096187e+02	6.058713e+02	4.529650e+02	4.283611e+02	3.192285e+02	4.412202e+01	1.690768e+02	1.620289e+02	4.438424e+02	4.998429e+02	4.367951e+02	1.617107e+01	-4.687572e+01	-2.612772e+01	1.687361e+02	2.596260e+02	2.180425e+02
2.610000e+02	1.856651e+03	1.008070e+03	6.327530e+02	5.105003e+02	4.906419e+02	3.303884e+02	9.925100e+01	1.957848e+02	1.870393e+02	4.457136e+02	5.144811e+02	4.369689e+02	7.353286e+01	-3.978437e+00	-1.507321e+01	2.145765e+02	2.760664e+02	2.482703e+02
2.620000e+02	1.781521e+03	1.055145e+03	6.302425e+02	5.282585e+02	5.274420e+02	3.234188e+02	1.365028e+02	2.143494e+02	2.042846e+02	4.259578e+02	5.043527e+02	4.158937e+02	1.123664e+02	2.390822e+01	-6.547457e+00	2.390422e+02	2.884007e+02	2.728858e+02
2.630000e+02	1.688412e+03	1.046377e+03	5.976486e+02	5.049215e+02	5.349912e+02	3.000124e+02	1.549369e+02	2.229269e+02	2.113744e+02	3.862740e+02	4.714666e+02	3.747223e+02	1.302009e+02	3.345737e+01	-3.209962e-01	2.411990e+02	2.937929e+02	2.901242e+02
2.640000e+02	1.588335e+03	9.869457e+02	5.396110e+02	4.460075e+02	5.142121e+02	2.647729e+02	1.562044e+02	2.211558e+02	2.079620e+02	3.316489e+02	4.209990e+02	3.184558e+02	1.275535e+02	2.501085e+01	4.098496e+00	2.230809e+02	2.911317e+02	2.991023e+02
2.650000e+02	1.493581e+03	8.898918e+02	4.649405e+02	3.627910e+02	4.703148e+02	2.244250e+02	1.439249e+02	2.098684e+02	1.951537e+02	2.697865e+02	3.605277e+02	2.550726e+02	1.077201e+02	2.265467e+00	7.283735e+00	1.892871e+02	2.810280e+02	2.998827e+02
2.660000e+02	1.415587e+03	7.726678e+02	3.844965e+02	2.698852e+02	4.114919e+02	1.863570e+02	1.227445e+02	1.906105e+02	1.748208e+02	2.096754e+02	2.986155e+02	1.938864e+02	7.600024e+01	-2.872847e+01	9.575583e+00	1.460636e+02	2.654283e+02	2.933761e+02
2.670000e+02	1.363880e+03	6.531801e+02	3.088565e+02	1.822099e+02	3.470577e+02	1.570184e+02	9.731890e+01	1.651837e+02	1.491060e+02	1.597502e+02	2.432031e+02	1.436731e+02	3.853799e+01	-6.099169e+01	1.078574e+01	1.000514e+02	2.470061e+02	2.810753e+02
2.680000e+02	1.345929e+03	5.465067e+02	2.464699e+02	1.121803e+02	2.855317e+02	1.407074e+02	7.153793e+01	1.354257e+02	1.202695e+02	1.262001e+02	2.002497e+02	1.110444e+02	1.136848e+00	-8.806822e+01	1.010132e+01	5.703133e+01	2.285000e+02	2.646899e+02
2.690000e+02	1.367272e+03	4.630459e+02	2.026751e+02	6.777479e+01	2.331724e+02	1.390663e+02	4.824767e+01	1.033223e+02	9.080888e+01	1.118660e+02	1.728904e+02	9.935299e+01	-3.157751e+01	-1.051148e+02	6.311653e+00	2.104810e+01	2.121237e+02	2.457993e+02
2.700000e+02	1.431187e+03	4.081848e+02	1.795594e+02	5.178218e+01	1.932912e+02	1.512789e+02	2.951260e+01	7.133782e+01	6.361605e+01	1.159430e+02	1.611761e+02	1.082216e+02	-5.643903e+01	-1.093935e+02	-1.671247e+00	-5.822465e+00	1.991130e+02	2.256400e+02
2.710000e+02	1.537624e+03	3.829947e+02	1.763594e+02	6.214933e+01	1.663913e+02	1.747014e+02	1.719598e+01	4.268080e+01	4.190277e+01	1.344564e+02	1.623287e+02	1.336785e+02	-7.152916e+01	-1.001793e+02	-1.418123e+01	-2.304824e+01	1.894388e+02	2.050727e+02
2.720000e+02	1.681685e+03	3.852244e+02	1.900469e+02	9.309741e+01	1.509022e+02	2.055745e+02	1.345306e+01	2.119357e+01	2.874784e+01	1.612988e+02	1.714081e+02	1.688532e+02	-7.575602e+01	-7.831098e+01	-3.031674e+01	-3.082177e+01	1.817232e+02	1.846893e+02
2.730000e+02	1.852505e+03	4.100556e+02	2.158834e+02	1.366029e+02	1.441397e+02	2.395727e+02	2.075181e+01	1.071733e+01	2.634269e+01	1.895405e+02	1.822990e+02	2.051659e+02	-6.856352e+01	-4.569671e+01	-4.783232e+01	-2.927941e+01	1.734183e+02	1.649669e+02
2.740000e+02	2.033460e+03	4.505196e+02	2.479400e+02	1.839119e+02	1.431500e+02	2.721560e+02	4.127374e+01	1.405830e+01	3.521231e+01	2.127276e+02	1.889109e+02	2.338814e+02	-4.997041e+01	-4.999943e+00	-6.348868e+01	-1.815366e+01	1.613030e+02	1.463783e+02
2.750000e+02	2.204263e+03	4.978671e+02	2.796999e+02	2.268752e+02	1.452479e+02	2.988583e+02	7.589171e+01	3.192794e+01	5.375877e+01	2.259410e+02	1.864076e+02	2.477716e+02	-2.089761e+01	4.046645e+01	-7.377594e+01	2.975640e+00	1.422719e+02	1.294118e+02
2.760000e+02	2.344760e+03	5.422837e+02	3.048327e+02	2.589814e+02	1.482313e+02	3.156786e+02	1.231887e+02	6.231065e+01	7.837086e+01	2.264618e+02	1.721906e+02	2.425217e+02	1.645828e+01	8.678940e+01	-7.579287e+01	3.397320e+01	1.142581e+02	1.145070e+02
2.770000e+02	2.439392e+03	5.741369e+02	3.180866e+02	2.760082e+02	1.503813e+02	3.196343e+02	1.790192e+02	1.005784e+02	1.041176e+02	2.139689e+02	1.463488e+02	2.175079e+02	5.849880e+01	1.296579e+02	-6.801987e+01	7.335529e+01	7.702637e+01	1.019525e+02
2.780000e+02	2.480840e+03	5.855731e+02	3.161003e+02	2.762425e+02	1.503963e+02	3.093627e+02	2.368982e+02	1.403847e+02	1.258098e+02	1.902904e+02	1.114117e+02	1.757152e+02	1.005255e+02	1.648293e+02	-5.077102e+01	1.178274e+02	3.256969e+01	9.180786e+01
2.790000e+02	2.471471e+03	5.720058e+02	2.978941e+02	2.602756e+02	1.473753e+02	2.855389e+02	2.891449e+02	1.750704e+02	1.390869e+02	1.588072e+02	7.149155e+01	1.228233e+02	1.374505e+02	1.887825e+02	-2.621786e+01	1.624146e+02	-1.503823e+01	8.390596e+01
2.800000e+02	2.421936e+03	5.329872e+02	2.648808e+02	2.304600e+02	1.408783e+02	2.508844e+02	3.284103e+02	1.991394e+02	1.412196e+02	1.236612e+02	3.112874e+01	6.574117e+01	1.647170e+02	1.993297e+02	2.001789e+00	2.011885e+02	-6.030892e+01	7.795535e+01
2.810000e+02	2.347386e+03	4.721493e+02	2.203957e+02	1.901844e+02	1.310038e+02	2.096655e+02	3.491077e+02	2.093729e+02	1.314751e+02	8.892061e+01	-5.754172e+00	1.102260e+01	1.791600e+02	1.959371e+02	2.948135e+01	2.283640e+02	-9.735883e+01	7.370773e+01
2.820000e+02	2.262672e+03	3.962230e+02	1.689014e+02	1.431503e+02	1.183746e+02	1.667723e+02	3.483805e+02	2.053309e+02	1.110713e+02	5.783009e+01	-3.648713e+01	-3.642961e+01	1.795783e+02	1.796360e+02	5.188794e+01	2.394393e+02	-1.210632e+02	7.110071e+01
2.830000e+02	2.178300e+03	3.134548e+02	1.151116e+02	9.280651e+01	1.039647e+02	1.266269e+02	3.264699e+02	1.892188e+02	8.285871e+01	3.225280e+01	-5.980088e+01	-7.410727e+01	1.669124e+02	1.526061e+02	6.577453e+01	2.320965e+02	-1.281306e+02	7.028156e+01
2.840000e+02	2.098549e+03	2.319212e+02	6.326826e+01	4.202723e+01	8.880864e+01	9.224138e+01	2.865460e+02	1.652862e+02	5.086722e+01	1.240093e+01	-7.562612e+01	-1.020180e+02	1.440440e+02	1.176522e+02	6.920408e+01	2.067060e+02	-1.178965e+02	7.147869e+01
2.850000e+02	2.022223e+03	1.582337e+02	1.672171e+01	-6.960404e+00	7.374633e+01	6.469841e+01	2.341506e+02	1.389914e+02	1.978542e+01	-3.063858e+00	-8.476771e+01	-1.222697e+02	1.153083e+02	7.780635e+01	6.206882e+01	1.663886e+02	-9.264168e+01	7.478913e+01
2.860000e+02	1.945455e+03	9.693287e+01	-2.217069e+01	-5.246218e+01	5.936618e+01	4.319306e+01	1.763775e+02	1.161170e+02	-5.629376e+00	-1.654150e+01	-8.862068e+01	-1.382876e+02	8.582471e+01	3.615770e+01	4.605030e+01	1.166430e+02	-5.727648e+01	8.001857e+01
2.870000e+02	1.865207e+03	5.056706e+01	-5.192821e+01	-9.311737e+01	4.619537e+01	2.558811e+01	1.208606e+02	1.019266e+02	-2.121890e+01	-3.070953e+01	-8.896509e+01	-1.538547e+02	6.073685e+01	-4.152964e+00	2.424218e+01	6.456287e+01	-1.836741e+01	8.668220e+01
2.880000e+02	1.781958e+03	2.015806e+01	-7.177483e+01	-1.277140e+02	3.499909e+01	9.276133e+00	7.463813e+01	1.003764e+02	-2.411912e+01	-4.765595e+01	-8.777546e+01	-1.721512e+02	4.443685e+01	-3.993907e+01	5.307219e-01	1.770583e+01	1.729313e+01	9.415270e+01
2.890000e+02	1.700536e+03	5.625836e+00	-8.155064e+01	-1.550855e+02	2.692596e+01	-7.945898e+00	4.301764e+01	1.133978e+02	-1.335567e+01	-6.819523e+01	-8.696787e+01	-1.949483e+02	3.986265e+01	-6.811807e+01	-2.112513e+01	-1.723204e+01	4.415768e+01	1.018126e+02
2.900000e+02	1.628928e+03	5.844621e+00	-8.175620e+01	-1.741128e+02	2.327731e+01	-2.726075e+01	2.865096e+01	1.403348e+02	9.827089e+00	-9.158356e+01	-8.807388e+01	-2.220910e+02	4.797808e+01	-8.603930e+01	-3.736757e+01	-3.567231e+01	5.894916e+01	1.090393e+02
2.910000e+02	1.575697e+03	1.830343e+01	-7.366997e+01	-1.838249e+02	2.488626e+01	-4.862628e+01	3.105739e+01	1.777038e+02	4.204290e+01	-1.157132e+02	-9.191914e+01	-2.513738e+02	6.754884e+01	-9.190603e+01	-4.595439e+01	-3.603006e+01	6.091574e+01	1.149697e+02
2.920000e+02	1.547181e+03	3.868529e+01	-5.940700e+01	-1.835831e+02	3.135585e+01	-7.097048e+01	4.676945e+01	2.194674e+02	7.829972e+01	-1.377070e+02	-9.843298e+01	-2.788745e+02	9.529136e+01	-8.515034e+01	-4.605131e+01	-1.996775e+01	5.132295e+01	1.181944e+02
2.930000e+02	1.545531e+03	6.086007e+01	-4.178640e+01	-1.733348e+02	4.056545e+01	-9.263932e+01	7.012522e+01	2.579477e+02	1.129340e+02	-1.547208e+02	-1.066980e+02	-2.997343e+02	1.263995e+02	-6.663689e+01	-3.828290e+01	8.043075e+00	3.252165e+01	1.166635e+02
2.940000e+02	1.568218e+03	7.766947e+01	-2.394992e+01	-1.539041e+02	4.879978e+01	-1.118988e+02	9.454773e+01	2.853237e+02	1.407687e+02	-1.647190e+02	-1.152750e+02	-3.092739e+02	1.553698e+02	-3.862905e+01	-2.454888e+01	4.172676e+01	7.072250e+00	1.080345e+02
2.950000e+02	1.608927e+03	8.249668e+01	-8.788055e+00	-1.272480e+02	5.159611e+01	-1.273329e+02	1.140053e+02	2.954391e+02	1.582338e+02	-1.670223e+02	-1.227412e+02	-3.042275e+02	1.769795e+02	-4.506737e+00	-7.632056e+00	7.431516e+01	-2.271983e+01	9.044796e+01
2.960000e+02	1.659295e+03	7.115217e+01	1.666673e+00	-9.656214e+01	4.506427e+01	-1.380695e+02	1.242943e+02	2.854618e+02	1.641578e+02	-1.624916e+02	-1.282948e+02	-2.837955e+02	1.872334e+02	3.173287e+01	9.346251e+00	9.987161e+01	-5.480810e+01	6.342463e+01
2.970000e+02	1.710805e+03	4.333634e+01	6.680976e+00	-6.611064e+01	2.718708e+01	-1.438405e+02	1.238465e+02	2.568904e+02	1.599902e+02	-1.533097e+02	-1.322305e+02	-2.502097e+02	1.840992e+02	6.612009e+01	2.352469e+01	1.143768e+02	-8.719045e+01	2.843319e+01
2.980000e+02	1.756371e+03	3.035730e+00	6.947057e+00	-4.071023e+01	-1.414796e+00	-1.449103e+02	1.139041e+02	2.155318e+02	1.493612e+02	-1.424146e+02	-1.360905e+02	-2.085850e+02	1.678749e+02	9.538067e+01	3.281803e+01	1.163994e+02	-1.178148e+02	-1.120786e+01
2.990000e+02	1.791488e+03	-4.235349e+01	4.365634e+00	-2.490852e+01	-3.754962e+01	-1.418901e+02	9.807464e+01	1.703653e+02	1.370864e+02	-1.327213e+02	-1.423687e+02	-1.659998e+02	1.410915e+02	1.174607e+02	3.621593e+01	1.072432e+02	-1.447931e+02	-5.110052e+01
3.000000e+02	1.815010e+03	-8.382663e+01	1.594227e+00	-2.201892e+01	-7.629044e+01	-1.354500e+02	8.140635e+01	1.315505e+02	1.279138e+02	-1.263200e+02	-1.537631e+02	-1.299564e+02	1.079377e+02	1.317448e+02	3.378820e+01	9.053609e+01	-1.668266e+02	-8.686835e+01
3.010000e+02	1.829523e+03	-1.127708e+02	1.551119e+00	-3.325149e+01	-1.121948e+02	-1.259626e+02	6.919974e+01	1.081134e+02	1.253863e+02	-1.238357e+02	-1.721351e+02	-1.065623e+02	7.331112e+01	1.388844e+02	2.642196e+01	7.132652e+01	-1.835211e+02	-1.150867e+02
3.020000e+02	1.841081e+03	-1.224314e+02	7.044672e+00	-5.717783e+01	-1.403953e+02	-1.131737e+02	6.579861e+01	1.059380e+02	1.311370e+02	-1.240928e+02	-1.974682e+02	-9.889327e+01	4.171587e+01	1.402913e+02	1.541373e+01	5.487945e+01	-1.952742e+02	-1.336636e+02
3.030000e+02	1.858006e+03	-1.084649e+02	2.058177e+01	-8.969522e+01	-1.571771e+02	-9.603752e+01	7.361033e+01	1.265823e+02	1.447488e+02	-1.241675e+02	-2.271905e+02	-1.060005e+02	1.630581e+01	1.374963e+02	2.081603e+00	4.548034e+01	-2.026565e+02	-1.416219e+02
3.040000e+02	1.888706e+03	-6.870272e+01	4.426393e+01	-1.245454e+02	-1.599695e+02	-7.284878e+01	9.258028e+01	1.671604e+02	1.641143e+02	-1.198508e+02	-2.561759e+02	-1.228964e+02	-1.648388e+00	1.316318e+02	-1.247298e+01	4.557831e+01	-2.055465e+02	-1.385590e+02
3.050000e+02	1.938962e+03	-2.635852e+00	7.959847e+01	-1.543271e+02	-1.470056e+02	-4.172724e+01	1.202629e+02	2.212074e+02	1.860953e+02	-1.064972e+02	-2.775674e+02	-1.416089e+02	-1.271758e+01	1.232416e+02	-2.741320e+01	5.549306e+01	-2.024969e+02	-1.242034e+02
3.060000e+02	2.009578e+03	8.881680e+01	1.270995e+02	-1.718364e+02	-1.170639e+02	-1.383178e+00	1.524748e+02	2.801857e+02	2.072617e+02	-8.016246e+01	-2.843032e+02	-1.530861e+02	-1.874956e+01	1.124682e+02	-4.207589e+01	7.369564e+01	-1.907573e+02	-9.836158e+01
3.070000e+02	2.095350e+03	2.029728e+02	1.857190e+02	-1.714775e+02	-6.962000e+01	4.804198e+01	1.843229e+02	3.351737e+02	2.245482e+02	-3.882941e+01	-2.709591e+02	-1.494547e+02	-2.202205e+01	9.948306e+01	-5.583830e+01	9.745158e+01	-1.670689e+02	-6.126684e+01
3.080000e+02	2.185838e+03	3.346497e+02	2.523391e+02	-1.504368e+02	-5.452711e+00	1.043578e+02	2.112628e+02	3.783321e+02	2.357416e+02	1.659748e+01	-2.353478e+02	-1.259930e+02	-2.444304e+01	8.491255e+01	-6.802673e+01	1.235025e+02	-1.289520e+02	-1.408231e+01
3.090000e+02	2.267770e+03	4.755442e+02	3.216561e+02	-1.093293e+02	7.256202e+01	1.632232e+02	2.298457e+02	4.039064e+02	2.397555e+02	8.190067e+01	-1.793413e+02	-8.225030e+01	-2.707813e+01	7.001356e+01	-7.790058e+01	1.485230e+02	-7.595733e+01	4.076485e+01
3.100000e+02	2.328258e+03	6.143110e+02	3.867080e+02	-5.213523e+01	1.589160e+02	2.187288e+02	2.379710e+02	4.087200e+02	2.366625e+02	1.500457e+02	-1.086080e+02	-2.201195e+01	-3.012233e+01	5.647440e+01	-8.469670e+01	1.692877e+02	-1.036771e+01	9.961693e+01
3.110000e+02	2.357785e+03	7.376759e+02	4.400720e+02	1.458558e+01	2.455974e+02	2.645961e+02	2.347018e+02	3.922488e+02	2.274787e+02	2.125937e+02	-3.131716e+01	4.782331e+01	-3.323674e+01	4.590432e+01	-8.769922e+01	1.826990e+02	6.290252e+01	1.579732e+02
3.120000e+02	2.352078e+03	8.325082e+02	4.754754e+02	8.303692e+01	3.230641e+02	2.956766e+02	2.198903e+02	3.564122e+02	2.137640e+02	2.617119e+02	4.380050e+01	1.190633e+02	-3.602539e+01	3.923794e+01	-8.631171e+01	1.859251e+02	1.371432e+02	2.110752e+02
3.130000e+02	2.312467e+03	8.883953e+02	4.893622e+02	1.457980e+02	3.819368e+02	3.092730e+02	1.939026e+02	3.051717e+02	1.971823e+02	2.921805e+02	1.094577e+02	1.841906e+02	-3.839162e+01	3.634180e+01	-8.013309e+01	1.768094e+02	2.051314e+02	2.545334e+02
3.140000e+02	2.244860e+03	9.000609e+02	4.819207e+02	1.973618e+02	4.150210e+02	3.058376e+02	1.576187e+02	2.439648e+02	1.791997e+02	3.027215e+02	1.613312e+02	2.379560e+02	-4.059336e+01	3.603191e+01	-6.905026e+01	1.545020e+02	2.605228e+02	2.849276e+02
3.150000e+02	2.157885e+03	8.689674e+02	4.572114e+02	2.352647e+02	4.191107e+02	2.888258e+02	1.126895e+02	1.789738e+02	1.610289e+02	2.961830e+02	1.987384e+02	2.782377e+02	-4.297229e+01	3.652737e+01	-5.334735e+01	1.200460e+02	2.990681e+02	3.003665e+02
3.160000e+02	2.060954e+03	8.035946e+02	4.222965e+02	2.605294e+02	3.960175e+02	2.637998e+02	6.187527e+01	1.162723e+02	1.437759e+02	2.785210e+02	2.243701e+02	3.060242e+02	-4.549438e+01	3.616010e+01	-3.380042e+01	7.659569e+01	3.194247e+02	3.009364e+02
3.170000e+02	1.962900e+03	7.181476e+02	3.855590e+02	2.772518e+02	3.524235e+02	2.371246e+02	9.232873e+00	6.096858e+01	1.285989e+02	2.569605e+02	2.432167e+02	3.245905e+02	-4.733838e+01	3.403575e+01	-1.170334e+01	2.906797e+01	3.233579e+02	2.888530e+02
3.180000e+02	1.871495e+03	6.297929e+02	3.546424e+02	2.913527e+02	2.984529e+02	2.146780e+02	-4.002510e+01	1.652741e+01	1.166619e+02	2.379807e+02	2.609973e+02	3.381150e+02	-4.676224e+01	3.035576e+01	1.122288e+01	-1.672308e+01	3.151778e+02	2.680953e+02
3.190000e+02	1.793684e+03	5.549462e+02	3.345658e+02	3.087585e+02	2.452597e+02	2.008919e+02	-8.005511e+01	-1.555843e+01	1.087948e+02	2.257711e+02	2.824977e+02	3.501243e+02	-4.136592e+01	2.626101e+01	3.304533e+01	-5.517659e+01	3.004376e+02	2.434424e+02
3.200000e+02	1.736008e+03	5.055430e+02	3.265497e+02	3.335149e+02	2.023018e+02	1.982525e+02	-1.052147e+02	-3.566498e+01	1.049892e+02	2.215605e+02	3.102417e+02	3.622147e+02	-2.870007e+01	2.327320e+01	5.191375e+01	-8.190732e+01	2.842098e+02	2.191382e+02
3.210000e+02	1.704585e+03	4.864172e+02	3.279104e+02	3.664402e+02	1.751684e+02	2.072242e+02	-1.110265e+02	-4.554901e+01	1.040252e+02	2.238850e+02	3.438492e+02	3.734595e+02	-7.019625e+00	2.259087e+01	6.635458e+01	-9.436617e+01	2.695348e+02	1.976807e+02
3.220000e+02	1.704310e+03	4.947075e+02	3.330860e+02	4.048074e+02	1.646928e+02	2.264931e+02	-9.505112e+01	-4.763601e+01	1.035221e+02	2.295636e+02	3.802473e+02	3.807221e+02	2.408479e+01	2.455986e+01	7.548847e+01	-9.198104e+01	2.566736e+02	1.792876e+02
3.230000e+02	1.737388e+03	5.215567e+02	3.355043e+02	4.432021e+02	1.676168e+02	2.534293e+02	-5.745636e+01	-4.429929e+01	1.005109e+02	2.349930e+02	4.146502e+02	3.798037e+02	6.339792e+01	2.855159e+01	7.913190e+01	-7.589291e+01	2.435094e+02	1.623197e+02
3.240000e+02	1.801819e+03	5.555054e+02	3.297149e+02	4.752659e+02	1.784580e+02	2.846929e+02	-1.125521e+00	-3.732415e+01	9.235446e+01	2.373600e+02	4.419749e+02	3.670392e+02	1.082262e+02	3.329072e+01	7.778873e+01	-4.845848e+01	2.269161e+02	1.444842e+02
3.250000e+02	1.890655e+03	5.863076e+02	3.130997e+02	4.957011e+02	1.917560e+02	3.169095e+02	6.876122e+01	-2.767143e+01	7.764169e+01	2.354575e+02	4.582280e+02	3.407713e+02	1.549293e+02	3.747274e+01	7.256457e+01	-1.269067e+01	2.044464e+02	1.242331e+02
3.260000e+02	1.992662e+03	6.077887e+02	2.866097e+02	5.018482e+02	2.038024e+02	3.473136e+02	1.456328e+02	-1.554947e+01	5.667187e+01	2.299374e+02	4.614465e+02	3.021593e+02	1.996884e+02	4.040146e+01	6.503573e+01	2.825676e+01	1.755455e+02	1.016719e+02
3.270000e+02	2.094488e+03	6.188663e+02	2.543227e+02	4.943639e+02	2.133022e+02	3.742331e+02	2.227663e+02	-7.132168e-01	3.132980e+01	2.229924e+02	4.519647e+02	2.550361e+02	2.393275e+02	4.239902e+01	5.708379e+01	7.152597e+01	1.417766e+02	7.855411e+01
3.280000e+02	2.183751e+03	6.226867e+02	2.220293e+02	4.768933e+02	2.209662e+02	3.972916e+02	2.945919e+02	1.713690e+01	4.427480e+00	2.176015e+02	4.320324e+02	2.048926e+02	2.720005e+02	4.486087e+01	5.068735e+01	1.149023e+02	1.060646e+02	5.741535e+01
3.290000e+02	2.251991e+03	6.245245e+02	1.953684e+02	4.549554e+02	2.284585e+02	4.172570e+02	3.577176e+02	3.797570e+01	-2.119267e+01	2.165607e+02	4.049955e+02	1.573929e+02	2.975625e+02	4.996003e+01	4.766029e+01	1.570219e+02	7.143760e+01	4.031494e+01
3.300000e+02	2.296366e+03	6.293694e+02	1.781321e+02	4.344236e+02	2.372394e+02	4.355633e+02	4.113302e+02	6.117088e+01	-4.343490e+01	2.215668e+02	3.743399e+02	1.169615e+02	3.174624e+02	6.008400e+01	4.934818e+01	1.973343e+02	3.990648e+01	2.780348e+01
3.310000e+02	2.319490e+03	6.399755e+02	1.712468e+02	4.199916e+02	2.476746e+02	4.536537e+02	4.567696e+02	8.533136e+01	-6.135425e+01	2.326008e+02	3.428791e+02	8.591574e+01	3.340765e+02	7.711291e+01	5.633283e+01	2.357175e+02	1.195867e+01	1.856947e+01
3.320000e+02	2.327563e+03	6.558155e+02	1.726837e+02	4.139668e+02	2.585537e+02	4.723906e+02	4.963484e+02	1.083026e+02	-7.512995e+01	2.478135e+02	3.123013e+02	6.438148e+01	3.495862e+02	1.016660e+02	6.823017e+01	2.717720e+02	-1.321669e+01	9.874672e+00
3.330000e+02	2.327642e+03	6.730929e+02	1.782723e+02	4.156810e+02	2.670421e+02	4.917813e+02	5.318009e+02	1.273309e+02	-8.573156e+01	2.640038e+02	2.831921e+02	5.094176e+01	3.647403e+02	1.324894e+02	8.367450e+01	3.040239e+02	-3.698015e+01	-1.446562e+00
3.340000e+02	2.325194e+03	6.857573e+02	1.831401e+02	4.217251e+02	2.690922e+02	5.111513e+02	5.629595e+02	1.394217e+02	-9.448709e+01	2.776272e+02	2.555219e+02	4.371881e+01	3.780075e+02	1.662037e+02	1.005456e+02	3.294358e+02	-6.034191e+01	-1.783690e+01
3.350000e+02	2.322793e+03	6.872796e+02	1.833293e+02	4.270308e+02	2.603345e+02	5.296777e+02	5.872232e+02	1.418817e+02	-1.027333e+02	2.860626e+02	2.294277e+02	4.144794e+01	3.855842e+02	1.976035e+02	1.164183e+02	3.436084e+02	-8.327227e+01	-4.013518e+01
3.360000e+02	2.320278e+03	6.727169e+02	1.770780e+02	4.265375e+02	2.373459e+02	5.469899e+02	6.000972e+02	1.329669e+02	-1.116196e+02	2.886976e+02	2.059760e+02	4.411133e+01	3.824275e+02	2.205618e+02	1.291244e+02	3.418050e+02	-1.044574e+02	-6.725266e+01
3.370000e+02	2.316017e+03	6.404368e+02	1.653453e+02	4.169166e+02	1.989835e+02	5.634683e+02	5.966504e+02	1.124710e+02	-1.220161e+02	2.873614e+02	1.875447e+02	5.287439e+01	3.640435e+02	2.293721e+02	1.372603e+02	3.205433e+02	-1.215579e+02	-9.648148e+01
3.380000e+02	2.308607e+03	5.929357e+02	1.514208e+02	3.977552e+02	1.473338e+02	5.800028e+02	5.733618e+02	8.205600e+01	-1.344026e+02	2.858234e+02	1.775724e+02	6.936473e+01	3.283917e+02	2.201828e+02	1.404791e+02	2.791820e+02	-1.318460e+02	-1.242839e+02
3.390000e+02	2.298294e+03	5.365323e+02	1.398137e+02	3.718129e+02	8.790722e+01	5.972608e+02	5.296798e+02	4.517003e+01	-1.486380e+02	2.884518e+02	1.796738e+02	9.464341e+01	2.771705e+02	1.921390e+02	1.394837e+02	2.208703e+02	-1.329604e+02	-1.472373e+02
3.400000e+02	2.287698e+03	4.801844e+02	1.349105e+02	3.443621e+02	2.898966e+01	6.148034e+02	4.687571e+02	6.524971e+00	-1.636116e+02	2.985224e+02	1.964012e+02	1.283850e+02	2.159778e+02	1.479607e+02	1.357448e+02	1.524753e+02	-1.234826e+02	-1.627621e+02
3.410000e+02	2.281727e+03	4.339806e+02	1.399576e+02	3.219808e+02	-1.961929e+01	6.305144e+02	3.971537e+02	-2.874006e+01	-1.769182e+02	3.168762e+02	2.281104e+02	1.686970e+02	1.532844e+02	9.387011e+01	1.310583e+02	8.351461e+01	-1.031305e+02	-1.693780e+02
3.420000e+02	2.286867e+03	4.078079e+02	1.567079e+02	3.112775e+02	-4.809173e+01	6.406901e+02	3.236588e+02	-5.597918e+01	-1.847948e+02	3.415032e+02	2.723677e+02	2.126863e+02	9.859163e+01	3.890950e+01	1.270921e+02	2.447095e+01	-7.255900e+01	-1.664789e+02
3.430000e+02	2.310043e+03	4.103389e+02	1.856780e+02	3.178588e+02	-4.796906e+01	6.408384e+02	2.576115e+02	-7.180833e+01	-1.825353e+02	3.682141e+02	3.241411e+02	2.574854e+02	6.037339e+01	-6.282856e+00	1.250406e+02	-1.501379e+01	-3.295161e+01	-1.538717e+02
3.440000e+02	2.357267e+03	4.481102e+02	2.266299e+02	3.455692e+02	-1.337290e+01	6.269217e+02	2.071536e+02	-7.457028e+01	-1.654436e+02	3.920744e+02	3.767425e+02	3.011991e+02	4.436980e+01	-3.117406e+01	1.254458e+02	-2.769473e+01	1.432519e+01	-1.314515e+02
3.450000e+02	2.432183e+03	5.243845e+02	2.788185e+02	3.958673e+02	5.792437e+01	5.965956e+02	1.777743e+02	-6.445658e+01	-1.301406e+02	4.089600e+02	4.232372e+02	3.432740e+02	5.259259e+01	-2.737102e+01	1.281844e+02	-9.862224e+00	6.778936e+01	-9.929322e+01
3.460000e+02	2.534680e+03	6.377842e+02	3.407832e+02	4.672653e+02	1.635812e+02	5.500234e+02	1.714025e+02	-4.332426e+01	-7.582523e+01	4.166094e+02	4.579013e+02	3.841064e+02	8.315776e+01	9.362568e+00	1.325905e+02	3.798762e+01	1.255956e+02	-5.817587e+01
3.470000e+02	2.659828e+03	7.811727e+02	4.098369e+02	5.549900e+02	2.961536e+02	4.900322e+02	1.862035e+02	-1.426962e+01	-5.017579e+00	4.148555e+02	4.773080e+02	4.241055e+02	1.308828e+02	7.768016e+01	1.376710e+02	1.110258e+02	1.851288e+02	-1.025432e+01
3.480000e+02	2.797472e+03	9.415383e+02	4.816794e+02	6.511837e+02	4.433606e+02	4.216202e+02	2.171416e+02	1.897534e+01	7.655349e+01	4.051267e+02	4.807586e+02	4.627030e+02	1.884786e+02	1.704230e+02	1.423716e+02	2.006472e+02	2.427134e+02	4.056129e+01
3.490000e+02	2.932845e+03	1.101466e+03	5.505439e+02	7.458950e+02	5.894980e+02	3.510147e+02	2.572189e+02	5.273304e+01	1.609494e+02	3.895951e+02	4.699959e+02	4.978099e+02	2.480826e+02	2.758967e+02	1.458339e+02	2.957985e+02	2.936988e+02	8.887880e+01
3.500000e+02	3.048356e+03	1.242171e+03	6.100062e+02	8.287925e+02	7.179898e+02	2.845717e+02	2.991094e+02	8.401879e+01	2.396062e+02	3.704003e+02	4.483799e+02	5.259864e+02	3.028033e+02	3.804101e+02	1.475801e+02	3.849372e+02	3.330512e+02	1.288228e+02
3.510000e+02	3.126408e+03	1.347374e+03	6.542296e+02	8.911767e+02	8.145736e+02	2.277994e+02	3.367574e+02	1.109654e+02	3.049988e+02	3.492308e+02	4.198771e+02	5.432633e+02	3.479105e+02	4.712973e+02	1.475653e+02	4.581881e+02	3.563838e+02	1.554913e+02
3.520000e+02	3.152790e+03	1.406888e+03	6.792164e+02	9.276825e+02	8.702706e+02	1.847146e+02	3.664967e+02	1.329218e+02	3.519004e+02	3.273156e+02	3.882464e+02	5.462937e+02	3.813861e+02	5.394342e+02	1.460789e+02	5.090970e+02	3.611719e+02	1.663773e+02
3.530000e+02	3.119910e+03	1.418881e+03	6.836700e+02	9.371808e+02	8.832703e+02	1.576418e+02	3.874179e+02	1.502363e+02	3.779660e+02	3.057033e+02	3.566802e+02	5.334328e+02	4.037456e+02	5.804993e+02	1.435259e+02	5.354789e+02	3.477899e+02	1.622541e+02
3.540000e+02	3.029061e+03	1.390274e+03	6.692806e+02	9.227026e+02	8.591781e+02	1.474500e+02	4.009820e+02	1.638634e+02	3.836426e+02	2.856370e+02	3.279301e+02	5.054164e+02	4.172844e+02	5.947719e+02	1.401625e+02	5.391686e+02	3.200084e+02	1.472054e+02
3.550000e+02	2.891084e+03	1.335258e+03	6.404503e+02	8.905225e+02	8.095511e+02	1.540989e+02	4.101053e+02	1.749850e+02	3.716055e+02	2.688436e+02	3.047176e+02	4.654646e+02	4.250568e+02	5.858052e+02	1.358703e+02	5.248496e+02	2.847008e+02	1.277538e+02
3.560000e+02	2.725130e+03	1.272307e+03	6.035701e+02	8.486894e+02	7.490811e+02	1.772468e+02	4.180236e+02	1.847730e+02	3.459757e+02	2.575931e+02	2.900884e+02	4.187964e+02	4.298927e+02	5.586022e+02	1.300365e+02	4.983696e+02	2.507112e+02	1.112916e+02
3.570000e+02	2.555704e+03	1.220212e+03	5.659527e+02	8.052940e+02	6.920783e+02	2.166066e+02	4.271835e+02	1.942880e+02	3.115246e+02	2.544268e+02	2.873914e+02	3.716641e+02	4.336305e+02	5.179047e+02	1.215808e+02	4.650034e+02	2.270749e+02	1.041890e+02
3.580000e+02	2.408607e+03	1.193831e+03	5.345169e+02	7.667253e+02	6.490491e+02	2.717897e+02	4.383167e+02	2.043998e+02	2.729892e+02	2.615267e+02	2.997252e+02	3.301168e+02	4.366100e+02	4.670029e+02	1.091489e+02	4.280532e+02	2.209958e+02	1.100365e+02
3.590000e+02	2.306587e+03	1.200333e+03	5.143879e+02	7.362098e+02	6.241886e+02	3.415812e+02	4.498293e+02	2.156111e+02	2.345609e+02	2.798262e+02	3.289522e+02	2.987766e+02	4.374355e+02	4.072609e+02	9.146747e+01	3.880737e+02	2.361146e+02	1.284947e+02
3.600000e+02	2.265522e+03	1.236956e+03	5.076971e+02	7.130015e+02	6.144937e+02	4.228937e+02	4.576849e+02	2.277657e+02	1.995675e+02	3.081289e+02	3.746145e+02	2.799313e+02	4.330733e+02	3.383908e+02	6.781493e+01	3.429194e+02	2.715736e+02	1.551360e+02
3.610000e+02	2.291710e+03	1.291121e+03	5.129442e+02	6.925741e+02	6.108812e+02	5.099151e+02	4.559813e+02	2.397677e+02	1.703249e+02	3.426190e+02	4.331999e+02	2.731765e+02	4.194011e+02	2.593781e+02	3.849932e+01	2.886842e+02	3.221959e+02	1.824595e+02
3.620000e+02	2.380645e+03	1.343268e+03	5.252069e+02	6.679377e+02	6.011512e+02	5.940273e+02	4.382891e+02	2.495227e+02	1.480899e+02	3.771168e+02	4.981425e+02	2.756842e+02	3.922573e+02	1.697991e+02	5.176615e+00	2.213775e+02	3.797723e+02	2.019237e+02
3.630000e+02	2.517510e+03	1.371883e+03	5.372520e+02	6.318114e+02	5.739986e+02	6.648444e+02	3.995333e+02	2.542704e+02	1.330413e+02	4.042107e+02	5.607095e+02	2.829816e+02	3.488336e+02	7.110551e+01	-2.915739e+01	1.388983e+02	4.350986e+02	2.064684e+02
3.640000e+02	2.679563e+03	1.359340e+03	5.413077e+02	5.790045e+02	5.228136e+02	7.122678e+02	3.378686e+02	2.513135e+02	1.242609e+02	4.170469e+02	6.116217e+02	2.899942e+02	2.890139e+02	-3.261397e+01	-6.058402e+01	4.264638e+01	4.801656e+02	1.927320e+02
3.650000e+02	2.840399e+03	1.296739e+03	5.310211e+02	5.082386e+02	4.479908e+02	7.289727e+02	2.558452e+02	2.389285e+02	1.197783e+02	4.112430e+02	6.429932e+02	2.920926e+02	2.161493e+02	-1.347519e+02	-8.501766e+01	-6.188563e+01	5.098750e+02	1.621890e+02
3.660000e+02	2.975642e+03	1.186250e+03	5.030634e+02	4.228381e+02	3.569819e+02	7.124770e+02	1.603219e+02	2.171013e+02	1.167947e+02	3.862688e+02	6.500601e+02	2.859620e+02	1.368790e+02	-2.272198e+02	-9.908215e+01	-1.658873e+02	5.228682e+02	1.207827e+02
3.670000e+02	3.068978e+03	1.040386e+03	4.579493e+02	3.301532e+02	2.621870e+02	6.660390e+02	6.105228e+01	1.877392e+02	1.121640e+02	3.457853e+02	6.322250e+02	2.702099e+02	5.994548e+01	-3.020703e+02	-1.008242e+02	-2.592023e+02	5.213889e+02	7.719202e+01
3.680000e+02	3.116874e+03	8.787050e+02	3.998755e+02	2.400172e+02	1.775829e+02	5.980473e+02	-3.156792e+01	1.542110e+02	1.030783e+02	2.967972e+02	5.931499e+02	2.456642e+02	-5.645469e+00	-3.531317e+02	-9.003996e+01	-3.328186e+02	5.104017e+02	4.039454e+01
3.690000e+02	3.130216e+03	7.232419e+02	3.356527e+02	1.627966e+02	1.153665e+02	5.201206e+02	-1.087278e+02	1.203659e+02	8.775804e+01	2.478945e+02	5.398942e+02	2.152864e+02	-5.248884e+01	-3.770970e+02	-6.814829e+01	-3.809541e+02	4.963215e+02	1.741143e+01
3.700000e+02	3.131742e+03	5.941519e+02	2.730553e+02	1.075882e+02	8.368815e+01	4.445683e+02	-1.645538e+02	8.943597e+01	6.589834e+01	2.071568e+02	4.813484e+02	1.836189e+02	-7.603035e+01	-3.737602e+02	-3.771851e+01	-4.019652e+02	4.856547e+02	1.194782e+01
3.710000e+02	3.149404e+03	5.066435e+02	2.190772e+02	8.093628e+01	8.593632e+01	3.819978e+02	-1.961690e+02	6.330082e+01	3.871199e+01	1.803650e+02	4.263825e+02	1.557759e+02	-7.483990e+01	-3.454467e+02	-1.868235e+00	-3.978014e+02	4.837394e+02	2.419668e+01
3.720000e+02	3.207376e+03	4.696462e+02	1.786071e+02	8.620262e+01	1.213672e+02	3.396812e+02	-2.026758e+02	4.242428e+01	8.600179e+00	1.700066e+02	3.821718e+02	1.361822e+02	-4.998056e+01	-2.959703e+02	3.625756e+01	-3.723497e+02	4.937188e+02	5.160812e+01
3.730000e+02	3.317548e+03	4.860287e+02	1.539063e+02	1.235346e+02	1.864518e+02	3.209325e+02	-1.837951e+02	2.644269e+01	-2.135317e+01	1.752591e+02	3.530908e+02	1.274630e+02	-3.930021e+00	-2.295578e+02	7.380994e+01	-3.294674e+02	5.159212e+02	9.015890e+01
3.740000e+02	3.474561e+03	5.538106e+02	1.449762e+02	1.902703e+02	2.762667e+02	3.253844e+02	-1.390294e+02	1.505197e+01	-4.783801e+01	1.928138e+02	3.403751e+02	1.299236e+02	6.034446e+01	-1.501070e+02	1.083693e+02	-2.715988e+02	5.478673e+02	1.356459e+02
3.750000e+02	3.656381e+03	6.676664e+02	1.505389e+02	2.815741e+02	3.854651e+02	3.498279e+02	-6.789436e+01	8.686848e+00	-6.762362e+01	2.181621e+02	3.425284e+02	1.418514e+02	1.397198e+02	-6.095710e+01	1.379795e+02	-1.995587e+02	5.850252e+02	1.846715e+02
3.760000e+02	3.830413e+03	8.200797e+02	1.690751e+02	3.910862e+02	5.086506e+02	3.892246e+02	2.884714e+01	8.591493e+00	-7.779180e+01	2.468664e+02	3.562241e+02	1.604830e+02	2.305997e+02	3.485888e+01	1.611846e+02	-1.135092e+02	6.221607e+02	2.351490e+02
3.770000e+02	3.963021e+03	1.001724e+03	1.993296e+02	5.114066e+02	6.402142e+02	4.375865e+02	1.475878e+02	1.619961e+01	-7.607262e+01	2.754017e+02	3.773282e+02	1.831295e+02	3.282733e+02	1.340748e+02	1.771181e+02	-1.459497e+01	6.548096e+02	2.862644e+02
3.780000e+02	4.028954e+03	1.201047e+03	2.399820e+02	6.343442e+02	7.738637e+02	4.885661e+02	2.808001e+02	3.210857e+01	-6.137752e+01	3.013589e+02	4.016767e+02	2.078730e+02	4.264673e+02	2.326638e+02	1.856261e+02	9.359512e+01	6.802683e+02	3.379301e+02
3.790000e+02	4.017330e+03	1.403548e+03	2.886785e+02	7.510429e+02	9.022018e+02	5.357622e+02	4.171711e+02	5.516198e+01	-3.440933e+01	3.230871e+02	4.254008e+02	2.335161e+02	5.175229e+02	3.256384e+02	1.873533e+02	2.044982e+02	6.977027e+02	3.899056e+02
3.800000e+02	3.932473e+03	1.591629e+03	3.410719e+02	8.522643e+02	1.016769e+03	5.728968e+02	5.431232e+02	8.213245e+01	1.970491e+00	3.391007e+02	4.448507e+02	2.589392e+02	5.933215e+02	4.074102e+02	1.837167e+02	3.093293e+02	7.074383e+02	4.409332e+02
3.810000e+02	3.790141e+03	1.745915e+03	3.906356e+02	9.291314e+02	1.108868e+03	5.940977e+02	6.453293e+02	1.082373e+02	4.295594e+01	3.476789e+02	4.564026e+02	2.823981e+02	6.467301e+02	4.727257e+02	1.767136e+02	3.989125e+02	7.099538e+02	4.883226e+02
3.820000e+02	3.611489e+03	1.848400e+03	4.296989e+02	9.744426e+02	1.171183e+03	5.945063e+02	7.134550e+02	1.283551e+02	8.271640e+01	3.469817e+02	4.565244e+02	3.013437e+02	6.730961e+02	5.179153e+02	1.685666e+02	4.659322e+02	7.052498e+02	5.283103e+02
3.830000e+02	3.417530e+03	1.886843e+03	4.515314e+02	9.843020e+02	1.199771e+03	5.712732e+02	7.423053e+02	1.385135e+02	1.158034e+02	3.357273e+02	4.423488e+02	3.130179e+02	6.712817e+02	5.419507e+02	1.612652e+02	5.067609e+02	6.930093e+02	5.571990e+02
3.840000e+02	3.225913e+03	1.858941e+03	4.527122e+02	9.594805e+02	1.195644e+03	5.247477e+02	7.327785e+02	1.371157e+02	1.385533e+02	3.141582e+02	4.126910e+02	3.155967e+02	6.438818e+02	5.467873e+02	1.561208e+02	5.221901e+02	6.734535e+02	5.728812e+02
3.850000e+02	3.050246e+03	1.774519e+03	4.347753e+02	9.058295e+02	1.165156e+03	4.594053e+02	6.914057e+02	1.254849e+02	1.499601e+02	2.848146e+02	3.690987e+02	3.092908e+02	5.965370e+02	5.367288e+02	1.534753e+02	5.168159e+02	6.483408e+02	5.760836e+02
3.860000e+02	2.900929e+03	1.654431e+03	4.043573e+02	8.333374e+02	1.118777e+03	3.839409e+02	6.286560e+02	1.075632e+02	1.517143e+02	2.526423e+02	3.163239e+02	2.967945e+02	5.365414e+02	5.170117e+02	1.526808e+02	4.973581e+02	6.214196e+02	5.707013e+02
3.870000e+02	2.786110e+03	1.526047e+03	3.716620e+02	7.539415e+02	1.068481e+03	3.101019e+02	5.564899e+02	8.888092e+01	1.474639e+02	2.241975e+02	2.617083e+02	2.827815e+02	4.711585e+02	4.922315e+02	1.523829e+02	4.705859e+02	5.978963e+02	5.629228e+02
3.880000e+02	2.711923e+03	1.416514e+03	3.477325e+02	6.787529e+02	1.024605e+03	2.502592e+02	4.858108e+02	7.511784e+01	1.416480e+02	2.060838e+02	2.133858e+02	2.726151e+02	4.061363e+02	4.653653e+02	1.510286e+02	4.416357e+02	5.829717e+02	5.593509e+02
3.890000e+02	2.681966e+03	1.345897e+03	3.414677e+02	6.156423e+02	9.932714e+02	2.142690e+02	4.244471e+02	7.066425e+01	1.383535e+02	2.031135e+02	1.777751e+02	2.708039e+02	3.448369e+02	4.378652e+02	1.474294e+02	4.132918e+02	5.799820e+02	5.647639e+02
3.900000e+02	2.696512e+03	1.322403e+03	3.573685e+02	5.680002e+02	9.752658e+02	2.066153e+02	3.761158e+02	7.755385e+01	1.405181e+02	2.168497e+02	1.572811e+02	2.798151e+02	2.881837e+02	4.107172e+02	1.411849e+02	3.863501e+02	5.889180e+02	5.803537e+02
3.910000e+02	2.751964e+03	1.341156e+03	3.946433e+02	5.349820e+02	9.666988e+02	2.248878e+02	3.405123e+02	9.501848e+01	1.495649e+02	2.450776e+02	1.491967e+02	2.996252e+02	2.353555e+02	3.857834e+02	1.328286e+02	3.607020e+02	6.059990e+02	6.031328e+02
3.920000e+02	2.840750e+03	1.386658e+03	4.477418e+02	5.129087e+02	9.610545e+02	2.602514e+02	3.143360e+02	1.197402e+02	1.653478e+02	2.823933e+02	1.464002e+02	3.280018e+02	1.849057e+02	3.665068e+02	1.236569e+02	3.364780e+02	6.245786e+02	6.267788e+02
3.930000e+02	2.951682e+03	1.437849e+03	5.079032e+02	4.970593e+02	9.517564e+02	2.998427e+02	2.928060e+02	1.466970e+02	1.862451e+02	3.216574e+02	1.397218e+02	3.612064e+02	1.358521e+02	3.573359e+02	1.153144e+02	3.146207e+02	6.371374e+02	6.436478e+02
3.940000e+02	3.070766e+03	1.473947e+03	5.651254e+02	4.830783e+02	9.342770e+02	3.303047e+02	2.711367e+02	1.703598e+02	2.093603e+02	3.557646e+02	1.211363e+02	3.947658e+02	8.831223e+01	3.619410e+02	1.092775e+02	2.965967e+02	6.376818e+02	6.472564e+02
3.950000e+02	3.182658e+03	1.479379e+03	6.101108e+02	4.676271e+02	9.071440e+02	3.412743e+02	2.455588e+02	1.859432e+02	2.309562e+02	3.791542e+02	8.657455e+01	4.241678e+02	4.345965e+01	3.810522e+02	1.064019e+02	2.834389e+02	6.237063e+02	6.343673e+02
3.960000e+02	3.272894e+03	1.446778e+03	6.360200e+02	4.484470e+02	8.717317e+02	3.277398e+02	2.137149e+02	1.904356e+02	2.473023e+02	3.887176e+02	3.731456e+01	4.455846e+02	2.863384e+00	4.111328e+02	1.066699e+02	2.746931e+02	5.970398e+02	6.059882e+02
3.970000e+02	3.330719e+03	1.377850e+03	6.400084e+02	4.243335e+02	8.312109e+02	2.906900e+02	1.745356e+02	1.832186e+02	2.559449e+02	3.840636e+02	-2.048133e+01	4.567900e+02	-3.245505e+01	4.448158e+02	1.092079e+02	2.679097e+02	5.633022e+02	5.669965e+02
3.980000e+02	3.351811e+03	1.282444e+03	6.243925e+02	3.954267e+02	7.892259e+02	2.361304e+02	1.278747e+02	1.661753e+02	2.570841e+02	3.673088e+02	-7.776780e+01	4.582174e+02	-6.278878e+01	4.731962e+02	1.125559e+02	2.590538e+02	5.301731e+02	5.245757e+02
3.990000e+02	3.339866e+03	1.176273e+03	5.970387e+02	3.638069e+02	7.487657e+02	1.730372e+02	7.420206e+01	1.432730e+02	2.544679e+02	3.425715e+02	-1.253049e+02	4.537660e+02	-8.995697e+01	4.891139e+02	1.150926e+02	2.437371e+02	5.050294e+02	4.860059e+02
4.000000e+02	3.306230e+03	1.077673e+03	5.704654e+02	3.339459e+02	7.114469e+02	1.110013e+02	1.453173e+01	1.196825e+02	2.552229e+02	3.152434e+02	-1.560725e+02	4.507833e+02	-1.168351e+02	4.900208e+02	1.154724e+02	2.187747e+02	4.926730e+02	4.565077e+02
4.010000e+02	3.267387e+03	1.003821e+03	5.594311e+02	3.124391e+02	6.772332e+02	5.819163e+01	-4.942663e+01	1.006007e+02	2.683953e+02	2.910368e+02	-1.667406e+02	4.588308e+02	-1.463895e+02	4.791821e+02	1.129425e+02	1.834195e+02	4.938145e+02	4.377858e+02
4.020000e+02	3.240947e+03	9.670902e+02	5.773737e+02	3.067128e+02	6.445670e+02	1.999703e+01	-1.150562e+02	9.004043e+01	3.025254e+02	2.748495e+02	-1.580013e+02	4.873337e+02	-1.806189e+02	4.647165e+02	1.074646e+02	1.397972e+02	5.047706e+02	4.277041e+02
4.030000e+02	3.241312e+03	9.723820e+02	6.326638e+02	3.229208e+02	6.109075e+02	-1.546243e+00	-1.787816e+02	8.991074e+01	3.630206e+02	2.696446e+02	-1.339628e+02	5.427536e+02	-2.198310e+02	4.568858e+02	9.964093e+01	9.241027e+01	5.184982e+02	4.211879e+02
4.040000e+02	3.276192e+03	1.016233e+03	7.258726e+02	3.637066e+02	5.736280e+02	-7.588137e+00	-2.363352e+02	9.965756e+01	4.501937e+02	2.756802e+02	-1.009728e+02	6.262155e+02	-2.625074e+02	4.646814e+02	9.050958e+01	4.693419e+01	5.266949e+02	4.120653e+02
4.050000e+02	3.344745e+03	1.087975e+03	8.489892e+02	4.266770e+02	5.310805e+02	-1.677961e+00	-2.833519e+02	1.165701e+02	5.585729e+02	2.904176e+02	-6.620481e+01	7.324196e+02	-3.057413e+02	4.928835e+02	8.129626e+01	8.744663e+00	5.223373e+02	3.952415e+02
4.060000e+02	3.437601e+03	1.172581e+03	9.868838e+02	5.042436e+02	4.834835e+02	1.145638e+01	-3.161443e+02	1.366382e+02	6.776410e+02	3.092441e+02	-3.623882e+01	8.502460e+02	-3.460013e+02	5.404840e+02	7.319880e+01	-1.835558e+01	5.018409e+02	3.684654e+02
4.070000e+02	3.538650e+03	1.254321e+03	1.120606e+03	5.850432e+02	4.332728e+02	2.728106e+01	-3.324141e+02	1.556698e+02	7.937667e+02	3.268402e+02	-1.582157e+01	9.649361e+02	-3.798921e+02	6.008661e+02	6.724408e+01	-3.285402e+01	4.661291e+02	3.330931e+02
4.080000e+02	3.628256e+03	1.320206e+03	1.231599e+03	6.566185e+02	3.847307e+02	4.261708e+01	-3.316645e+02	1.703173e+02	8.928564e+02	3.387438e+02	-7.010203e+00	1.061282e+03	-4.046626e+02	6.636300e+02	6.421746e+01	-3.553693e+01	4.202703e+02	2.936268e+02
4.090000e+02	3.687390e+03	1.362391e+03	1.305718e+03	7.085976e+02	3.429933e+02	5.624199e+01	-3.151920e+02	1.787320e+02	9.631532e+02	3.425658e+02	-8.903435e+00	1.126986e+03	-4.183876e+02	7.175024e+02	6.463749e+01	-2.886743e+01	3.718638e+02	2.562578e+02
4.100000e+02	3.701911e+03	1.379099e+03	1.336007e+03	7.353829e+02	3.127681e+02	6.874878e+01	-2.856877e+02	1.807121e+02	9.975788e+02	3.384284e+02	-1.806963e+01	1.155294e+03	-4.199104e+02	7.534540e+02	6.873995e+01	-1.600745e+01	3.287788e+02	2.269677e+02
4.110000e+02	3.665908e+03	1.373946e+03	1.323532e+03	7.374427e+02	2.971649e+02	8.174394e+01	-2.466098e+02	1.773771e+02	9.950336e+02	3.284986e+02	-2.958953e+01	1.146154e+03	-4.087105e+02	7.670338e+02	7.644588e+01	1.454091e-01	2.970226e+02	2.098294e+02
4.120000e+02	3.583072e+03	1.353923e+03	1.276071e+03	7.207092e+02	2.969555e+02	9.672006e+01	-2.015277e+02	1.705279e+02	9.602438e+02	3.158273e+02	-3.843003e+01	1.105542e+03	-3.848320e+02	7.591410e+02	8.731118e+01	1.758008e+01	2.793782e+02	2.060025e+02
4.130000e+02	3.465465e+03	1.326594e+03	1.205088e+03	6.942338e+02	3.104090e+02	1.140590e+02	-1.536080e+02	1.619282e+02	9.021230e+02	3.029657e+02	-4.075824e+01	1.043159e+03	-3.489248e+02	7.349939e+02	1.004817e+02	3.529911e+01	2.751122e+02	2.136341e+02
4.140000e+02	3.330047e+03	1.297360e+03	1.122014e+03	6.669041e+02	3.336846e+02	1.325565e+02	-1.053256e+02	1.527449e+02	8.311158e+02	2.908984e+02	-3.484115e+01	9.692676e+02	-3.023631e+02	7.017471e+02	1.146954e+02	5.301663e+01	2.806696e+02	2.285803e+02
4.150000e+02	3.194138e+03	1.267673e+03	1.035089e+03	6.444118e+02	3.616397e+02	1.496414e+02	-5.840044e+01	1.433182e+02	7.563899e+02	2.786994e+02	-2.132787e+01	8.917694e+02	-2.473572e+02	6.657416e+02	1.283725e+02	7.065780e+01	2.909827e+02	2.456348e+02
4.160000e+02	3.071473e+03	1.234827e+03	9.478351e+02	6.275721e+02	3.888294e+02	1.621852e+02	-1.390876e+01	1.332953e+02	6.838113e+02	2.640237e+02	-2.904604e+00	8.145381e+02	-1.869655e+02	6.304786e+02	1.398122e+02	8.792997e+01	3.008996e+02	2.598459e+02
4.170000e+02	2.970096e+03	1.193326e+03	8.595215e+02	6.125518e+02	4.104469e+02	1.675697e+02	2.750766e+01	1.220184e+02	6.153090e+02	2.442123e+02	1.652272e+01	7.375014e+02	-1.249490e+02	5.960309e+02	1.474746e+02	1.041504e+02	3.062959e+02	2.675284e+02
4.180000e+02	2.892446e+03	1.137259e+03	7.672258e+02	5.928102e+02	4.229921e+02	1.645866e+02	6.540980e+01	1.089554e+02	5.496804e+02	2.175451e+02	3.286459e+01	6.582686e+02	-6.545766e+01	5.599474e+02	1.502854e+02	1.183683e+02	3.046228e+02	2.667373e+02
4.190000e+02	2.837035e+03	1.062763e+03	6.684918e+02	5.619272e+02	4.245781e+02	1.538178e+02	9.937904e+01	9.396581e+01	4.843666e+02	1.841246e+02	4.282972e+01	5.745241e+02	-1.259616e+01	5.190992e+02	1.478817e+02	1.296857e+02	2.948911e+02	2.571985e+02
4.200000e+02	2.800603e+03	9.697529e+02	5.634961e+02	5.162517e+02	4.149320e+02	1.373676e+02	1.289487e+02	7.729978e+01	4.174533e+02	1.460422e+02	4.463185e+01	4.861945e+02	3.005797e+01	4.716214e+02	1.407242e+02	1.376231e+02	2.773076e+02	2.399008e+02
4.210000e+02	2.779800e+03	8.625272e+02	4.559707e+02	4.565064e+02	3.952468e+02	1.180988e+02	1.536965e+02	5.937875e+01	3.491814e+02	1.067885e+02	3.830805e+01	3.965901e+02	5.991712e+01	4.181998e+02	1.300424e+02	1.423860e+02	2.528595e+02	2.166354e+02
4.220000e+02	2.771931e+03	7.492726e+02	3.526973e+02	3.879650e+02	3.680268e+02	9.874373e+01	1.735045e+02	4.051858e+01	2.825016e+02	7.019488e+01	2.565800e+01	3.121770e+02	7.578878e+01	3.623082e+02	1.176209e+02	1.449552e+02	2.230702e+02	1.896955e+02
4.230000e+02	2.774914e+03	6.408031e+02	2.619225e+02	3.193347e+02	3.369529e+02	8.130639e+01	1.889184e+02	2.077923e+01	2.225431e+02	3.937851e+01	9.900200e+00	2.411417e+02	7.819360e+01	3.094354e+02	1.054758e+02	1.469900e+02	1.899614e+02	1.617662e+02
4.240000e+02	2.786889e+03	5.488764e+02	1.913433e+02	2.608204e+02	3.066583e+02	6.700373e+01	2.014545e+02	5.157793e-02	1.752135e+02	1.612881e+01	-4.845815e+00	1.912903e+02	6.953047e+01	2.656669e+02	9.547677e+01	1.505792e+02	1.560773e+02	1.358700e+02
4.250000e+02	2.805937e+03	4.843607e+02	1.463463e+02	2.219406e+02	2.822587e+02	5.668615e+01	2.136465e+02	-2.163227e+01	1.454149e+02	9.304444e-01	-1.419403e+01	1.679774e+02	5.396332e+01	2.361350e+02	8.897336e+01	1.578904e+02	1.243661e+02	1.151797e+02
4.260000e+02	2.830229e+03	4.554486e+02	1.289845e+02	2.095761e+02	2.685652e+02	5.138867e+01	2.286606e+02	-4.369886e+01	1.354938e+02	-6.510383e+00	-1.423850e+01	1.726824e+02	3.689351e+01	2.238146e+02	8.648153e+01	1.707612e+02	9.780116e+01	1.025947e+02
4.270000e+02	2.858679e+03	4.661262e+02	1.378564e+02	2.265814e+02	2.690816e+02	5.257029e+01	2.494657e+02	-6.474343e+01	1.444736e+02	-6.618280e+00	-2.388149e+00	2.025991e+02	2.398174e+01	2.289692e+02	8.749200e+01	1.902769e+02	7.880117e+01	1.001329e+02
4.280000e+02	2.891954e+03	5.151548e+02	1.687363e+02	2.711594e+02	2.850537e+02	6.177285e+01	2.777668e+02	-8.253714e+01	1.683278e+02	4.073285e-01	2.184362e+01	2.512728e+02	1.988567e+01	2.493151e+02	9.046684e+01	2.164012e+02	6.864840e+01	1.083272e+02
4.290000e+02	2.933432e+03	5.958395e+02	2.155967e+02	3.371017e+02	3.149024e+02	7.978878e+01	3.131023e+02	-9.442213e+01	2.011484e+02	1.444712e+01	5.635698e+01	3.100184e+02	2.708213e+01	2.807438e+02	9.307602e+01	2.477607e+02	6.713704e+01	1.258617e+02
4.300000e+02	2.989473e+03	6.967523e+02	2.716309e+02	4.148737e+02	3.542890e+02	1.057621e+02	3.525238e+02	-9.803122e+01	2.367015e+02	3.492823e+01	9.658326e+01	3.696618e+02	4.521060e+01	3.182893e+02	9.267838e+01	2.816900e+02	7.259402e+01	1.496313e+02
4.310000e+02	3.068323e+03	8.033672e+02	3.300045e+02	4.933500e+02	3.968743e+02	1.367547e+02	3.910843e+02	-9.211383e+01	2.697385e+02	6.026478e+01	1.363445e+02	4.221181e+02	7.123040e+01	3.570042e+02	8.697572e+01	3.145947e+02	8.227479e+01	1.752707e+02
4.320000e+02	3.177345e+03	9.003147e+02	3.842733e+02	5.618136e+02	4.355959e+02	1.681138e+02	4.230196e+02	-7.716443e+01	2.966051e+02	8.766689e+01	1.693051e+02	4.614374e+02	1.003744e+02	3.925069e+02	7.468989e+01	3.425731e+02	9.301830e+01	1.980467e+02
4.330000e+02	3.319018e+03	9.737851e+02	4.285944e+02	6.117386e+02	4.641159e+02	1.945874e+02	4.431989e+02	-5.558440e+01	3.150816e+02	1.135115e+02	1.905798e+02	4.841784e+02	1.275583e+02	4.211570e+02	5.606640e+01	3.621236e+02	1.019884e+02	2.138710e+02
4.340000e+02	3.487083e+03	1.013597e+03	4.579584e+02	6.379517e+02	4.780388e+02	2.117630e+02	4.483082e+02	-3.126243e+01	3.237948e+02	1.341624e+02	1.979418e+02	4.892205e+02	1.487291e+02	4.400078e+02	3.302435e+01	3.707084e+02	1.073276e+02	2.201408e+02
4.350000e+02	3.664776e+03	1.014595e+03	4.686357e+02	6.390065e+02	4.755967e+02	2.172615e+02	4.373808e+02	-8.669774e+00	3.217360e+02	1.468985e+02	1.922121e+02	4.773050e+02	1.616991e+02	4.467920e+02	8.861477e+00	3.670186e+02	1.085763e+02	2.161579e+02
4.360000e+02	3.826697e+03	9.772570e+02	4.588813e+02	6.168902e+02	4.576976e+02	2.112542e+02	4.116100e+02	8.252242e+00	3.083033e+02	1.505769e+02	1.767363e+02	4.506286e+02	1.662590e+02	4.401512e+02	-1.243892e+01	3.509337e+02	1.067634e+02	2.030298e+02
4.370000e+02	3.944597e+03	9.075781e+02	4.297357e+02	5.763568e+02	4.274532e+02	1.962111e+02	3.736999e+02	1.706054e+01	2.839115e+02	1.458232e+02	1.562259e+02	4.126747e+02	1.636793e+02	4.201280e+02	-2.711439e+01	3.233130e+02	1.041409e+02	1.831420e+02
4.380000e+02	3.995489e+03	8.163698e+02	3.855835e+02	5.241776e+02	3.894337e+02	1.761253e+02	3.271549e+02	1.733579e+01	2.508079e+02	1.347746e+02	1.354726e+02	3.682473e+02	1.559274e+02	3.887020e+02	-3.247927e+01	2.858053e+02	1.036303e+02	1.594508e+02
4.390000e+02	3.969200e+03	7.180563e+02	3.340959e+02	4.684539e+02	3.489022e+02	1.556327e+02	2.758341e+02	1.061834e+01	2.135183e+02	1.205769e+02	1.184456e+02	3.234773e+02	1.449738e+02	3.500054e+02	-2.748498e+01	2.407793e+02	1.081258e+02	1.348838e+02
4.400000e+02	3.872358e+03	6.290036e+02	2.853233e+02	4.179573e+02	3.111613e+02	1.393700e+02	2.238544e+02	-2.037960e-01	1.784692e+02	1.068535e+02	1.080442e+02	2.855269e+02	1.324277e+02	3.099104e+02	-1.285117e+01	1.913389e+02	1.198259e+02	1.120457e+02
4.410000e+02	3.727134e+03	5.653955e+02	2.499973e+02	3.813745e+02	2.809953e+02	1.316681e+02	1.756751e+02	-1.185230e+01	1.527292e+02	9.726752e+01	1.064380e+02	2.618494e+02	1.195227e+02	2.749342e+02	9.210394e+00	1.412755e+02	1.397238e+02	9.323640e+01
4.420000e+02	3.565192e+03	5.407830e+02	2.374192e+02	3.663679e+02	2.621073e+02	1.364165e+02	1.360552e+02	-2.166858e+01	1.422568e+02	9.516195e+01	1.156325e+02	2.590877e+02	1.072783e+02	2.507336e+02	3.553009e+01	9.480156e+01	1.673098e+02	8.061316e+01
4.430000e+02	3.419094e+03	5.636302e+02	2.535100e+02	3.784875e+02	2.564966e+02	1.568268e+02	1.096323e+02	-2.838346e+01	1.503050e+02	1.032046e+02	1.378006e+02	2.818934e+02	9.659261e+01	2.406856e+02	6.257948e+01	5.601098e+01	2.004894e+02	7.626121e+01
4.440000e+02	3.314208e+03	6.353729e+02	2.995677e+02	4.201117e+02	2.638835e+02	1.949245e+02	1.000785e+02	-3.243450e+01	1.765638e+02	1.230035e+02	1.750658e+02	3.320021e+02	8.810846e+01	2.450451e+02	8.698639e+01	2.815839e+01	2.357286e+02	8.201987e+01
4.450000e+02	3.263536e+03	7.495706e+02	3.720408e+02	4.896673e+02	2.814438e+02	2.508393e+02	1.090585e+02	-3.575575e+01	2.172872e+02	1.547532e+02	2.287240e+02	4.077965e+02	8.187019e+01	2.609431e+02	1.059109e+02	1.297336e+01	2.684733e+02	9.909460e+01
4.460000e+02	3.266531e+03	8.925642e+02	4.632818e+02	5.813644e+02	3.041417e+02	3.221806e+02	1.354008e+02	-4.111603e+01	2.662423e+02	1.970389e+02	2.981966e+02	5.043978e+02	7.696645e+01	2.831681e+02	1.173067e+02	1.026019e+01	2.938838e+02	1.276468e+02
4.470000e+02	3.311475e+03	1.045672e+03	5.629613e+02	6.855870e+02	3.257802e+02	4.038366e+02	1.748970e+02	-5.120582e+01	3.160565e+02	2.469041e+02	3.801721e+02	6.141669e+02	7.142035e+01	3.054157e+02	1.201141e+02	1.796570e+01	3.078161e+02	1.665893e+02
4.480000e+02	3.380042e+03	1.188496e+03	6.597192e+02	7.899642e+02	3.405698e+02	4.884076e+02	2.209521e+02	-6.773572e+01	3.595202e+02	3.001981e+02	4.683487e+02	7.274547e+02	6.251018e+01	3.216167e+02	1.143949e+02	3.274395e+01	3.078270e+02	2.137045e+02
4.490000e+02	3.452414e+03	1.302568e+03	7.427179e+02	8.810283e+02	3.447330e+02	5.672523e+02	2.659851e+02	-9.079792e+01	3.905848e+02	3.521320e+02	5.539969e+02	8.335155e+02	4.751387e+01	3.270329e+02	1.013600e+02	5.086612e+01	2.938676e+02	2.660284e+02
4.500000e+02	3.511606e+03	1.374507e+03	8.029492e+02	9.462700e+02	3.375676e+02	6.319254e+02	3.031784e+02	-1.186618e+02	4.050160e+02	3.979319e+02	6.273045e+02	9.216105e+02	2.466089e+01	3.189674e+02	8.321369e+01	6.918633e+01	2.683817e+02	3.203237e+02
4.510000e+02	3.546239e+03	1.398048e+03	8.342978e+02	9.762944e+02	3.215748e+02	6.756929e+02	3.280209e+02	-1.480515e+02	4.007830e+02	4.335133e+02	6.792352e+02	9.823487e+02	-6.052658e+00	2.970613e+02	6.277023e+01	8.584262e+01	2.357324e+02	3.734786e+02
4.520000e+02	3.551538e+03	1.374693e+03	8.343777e+02	9.666831e+02	3.016270e+02	6.948210e+02	3.391591e+02	-1.748215e+02	3.782470e+02	4.561291e+02	7.034794e+02	1.009198e+03	-4.251363e+01	2.632058e+02	4.288419e+01	1.004686e+02	2.011585e+02	4.227766e+02
4.530000e+02	3.528808e+03	1.313022e+03	8.050531e+02	9.191173e+02	2.835249e+02	6.893844e+02	3.383304e+02	-1.948442e+02	3.401156e+02	4.649359e+02	6.980056e+02	9.998964e+02	-8.077752e+01	2.211135e+02	2.582738e+01	1.138831e+02	1.696418e+02	4.660952e+02
4.540000e+02	3.483954e+03	1.226964e+03	7.524341e+02	8.413910e+02	2.724790e+02	6.634029e+02	3.294857e+02	-2.048885e+02	2.910842e+02	4.613483e+02	6.657669e+02	9.573216e+02	-1.159293e+02	1.756257e+02	1.279157e+01	1.274323e+02	1.450467e+02	5.021071e+02
4.550000e+02	3.425686e+03	1.133309e+03	6.861298e+02	7.461796e+02	2.719850e+02	6.242000e+02	3.174828e+02	-2.032988e+02	2.371264e+02	4.490020e+02	6.142958e+02	8.894275e+02	-1.432469e+02	1.318851e+02	3.666736e+00	1.422858e+02	1.296992e+02	5.304749e+02
4.560000e+02	3.363937e+03	1.048851e+03	6.177016e+02	6.487710e+02	2.833050e+02	5.810267e+02	3.068279e+02	-1.903618e+02	1.845215e+02	4.331789e+02	5.542193e+02	8.080623e+02	-1.592907e+02	9.455257e+01	-2.846592e+00	1.589808e+02	1.243243e+02	5.519288e+02
4.570000e+02	3.308718e+03	9.875096e+02	5.585311e+02	5.642718e+02	3.054962e+02	5.431986e+02	3.008455e+02	-1.683230e+02	1.388166e+02	4.197136e+02	4.970502e+02	7.268530e+02	-1.625809e+02	6.722219e+01	-8.838317e+00	1.773612e+02	1.281352e+02	5.680825e+02
4.580000e+02	3.269281e+03	9.579125e+02	5.175767e+02	5.049285e+02	3.357792e+02	5.181794e+02	3.014094e+02	-1.410464e+02	1.039551e+02	4.136211e+02	4.528315e+02	6.586223e+02	-1.536936e+02	5.209741e+01	-1.662323e+01	1.968516e+02	1.389279e+02	5.809320e+02
4.590000e+02	3.253271e+03	9.619143e+02	4.995975e+02	4.781024e+02	3.700613e+02	5.101030e+02	3.090930e+02	-1.133261e+02	8.175064e+01	4.178468e+02	4.282203e+02	6.129229e+02	-1.348204e+02	4.988248e+01	-2.814732e+01	2.168371e+02	1.532245e+02	5.921315e+02
4.600000e+02	3.265611e+03	9.944236e+02	5.043204e+02	4.851967e+02	4.035417e+02	5.190972e+02	3.234381e+02	-8.989580e+01	7.178475e+01	4.325361e+02	4.254038e+02	5.942159e+02	-1.090189e+02	5.979334e+01	-4.448188e+01	2.368771e+02	1.666650e+02	6.022658e+02
4.610000e+02	3.307174e+03	1.044641e+03	5.267591e+02	5.216105e+02	4.314060e+02	5.415174e+02	3.430626e+02	-7.429470e+01	7.171710e+01	4.550429e+02	4.419682e+02	6.010539e+02	-7.944277e+01	7.964294e+01	-6.548945e+01	2.565880e+02	1.748182e+02	6.103660e+02
4.620000e+02	3.373740e+03	1.098458e+03	5.585654e+02	5.776750e+02	4.495905e+02	5.709336e+02	3.655377e+02	-6.789488e+01	7.793360e+01	4.806330e+02	4.716174e+02	6.264607e+02	-4.878480e+01	1.060584e+02	-8.972108e+01	2.752369e+02	1.743534e+02	6.138325e+02
4.630000e+02	3.455947e+03	1.141470e+03	5.900278e+02	6.404939e+02	4.554980e+02	5.995553e+02	3.872259e+02	-6.948503e+01	8.641599e+01	5.036134e+02	5.055460e+02	6.595136e+02	-1.901853e+01	1.349489e+02	-1.145822e+02	2.912838e+02	1.642136e+02	6.088080e+02
4.640000e+02	3.540828e+03	1.161903e+03	6.122032e+02	6.965245e+02	4.484657e+02	6.197622e+02	4.034260e+02	-7.570567e+01	9.367459e+01	5.185304e+02	5.342413e+02	6.879099e+02	8.616088e+00	1.622843e+02	-1.367625e+02	3.021937e+02	1.462707e+02	5.909310e+02
4.650000e+02	3.614911e+03	1.152843e+03	6.186795e+02	7.345233e+02	4.298229e+02	6.254746e+02	4.090991e+02	-8.233016e+01	9.754516e+01	5.211362e+02	5.494503e+02	7.010108e+02	3.351404e+01	1.850742e+02	-1.528588e+02	3.047601e+02	1.250608e+02	5.563435e+02
4.660000e+02	3.668110e+03	1.113328e+03	6.066010e+02	7.482017e+02	4.025195e+02	6.131729e+02	4.001648e+02	-8.599490e+01	9.763611e+01	5.089666e+02	5.459608e+02	6.925970e+02	5.560626e+01	2.022420e+02	-1.600506e+02	2.959580e+02	1.065588e+02	5.027984e+02
4.670000e+02	3.696956e+03	1.048163e+03	5.767815e+02	7.377916e+02	3.704745e+02	5.824281e+02	3.750002e+02	-8.571207e+01	9.526082e+01	4.815223e+02	5.227783e+02	6.624947e+02	7.529847e+01	2.150143e+02	-1.566561e+02	2.740938e+02	9.637740e+01	4.306737e+02
4.680000e+02	3.705716e+03	9.665507e+02	5.329623e+02	7.098937e+02	3.378758e+02	5.358515e+02	3.355528e+02	-8.352037e+01	9.282436e+01	4.401393e+02	4.833346e+02	6.164836e+02	9.341158e+01	2.265600e+02	-1.424286e+02	2.398400e+02	9.803207e+01	3.436550e+02
4.690000e+02	3.704573e+03	8.798988e+02	4.804907e+02	6.755127e+02	3.086154e+02	4.784526e+02	2.875231e+02	-8.396339e+01	9.283160e+01	3.876601e+02	4.345973e+02	5.644548e+02	1.110593e+02	2.409164e+02	-1.185383e+02	1.967302e+02	1.118813e+02	2.488140e+02
4.700000e+02	3.705287e+03	7.993139e+02	4.248639e+02	6.468701e+02	2.859220e+02	4.165181e+02	2.393765e+02	-9.257937e+01	9.687432e+01	3.279902e+02	3.852846e+02	5.174438e+02	1.294277e+02	2.615864e+02	-8.727367e+01	1.508485e+02	1.350697e+02	1.558661e+02
4.710000e+02	3.715969e+03	7.334467e+02	3.706307e+02	6.341193e+02	2.721535e+02	3.562584e+02	2.003767e+02	-1.140015e+02	1.050348e+02	2.655963e+02	3.437051e+02	4.846325e+02	1.494881e+02	2.904151e+02	-5.155208e+01	1.097145e+02	1.624353e+02	7.556786e+01
4.720000e+02	3.737224e+03	6.872977e+02	3.210229e+02	6.431746e+02	2.687089e+02	3.025568e+02	1.782081e+02	-1.504133e+02	1.160315e+02	2.049915e+02	3.158742e+02	4.714364e+02	1.717396e+02	3.273014e+02	-1.433911e+01	8.064297e+01	1.880625e+02	1.750061e+01
4.730000e+02	3.761585e+03	6.623585e+02	2.783970e+02	6.754248e+02	2.760794e+02	2.581485e+02	1.769326e+02	-2.009267e+02	1.281297e+02	1.502673e+02	3.044674e+02	4.793239e+02	1.961025e+02	3.709587e+02	2.191790e+01	6.905178e+01	2.070245e+02	-1.221489e+01
4.740000e+02	3.776838e+03	6.579971e+02	2.451967e+02	7.292759e+02	2.940854e+02	2.234552e+02	1.959459e+02	-2.620435e+02	1.404556e+02	1.047410e+02	3.088666e+02	5.072404e+02	2.220373e+02	4.204108e+02	5.571344e+01	7.723226e+01	2.168502e+02	-1.255256e+01
4.750000e+02	3.772096e+03	6.734434e+02	2.248569e+02	8.026146e+02	3.222593e+02	1.971047e+02	2.302883e+02	-3.289126e+02	1.540784e+02	7.077832e+01	3.261652e+02	5.537698e+02	2.488469e+02	4.764512e+02	8.660471e+01	1.039624e+02	2.182940e+02	1.208132e+01
4.760000e+02	3.744084e+03	7.093556e+02	2.220309e+02	8.948086e+02	3.601723e+02	1.769463e+02	2.722197e+02	-3.967922e+02	1.722364e+02	4.979441e+01	3.526532e+02	6.188234e+02	2.759874e+02	5.421574e+02	1.149012e+02	1.450684e+02	2.151009e+02	5.308664e+01
4.770000e+02	3.700756e+03	7.680199e+02	2.417929e+02	1.007040e+03	4.074046e+02	1.611946e+02	3.135368e+02	-4.620888e+02	1.994205e+02	4.237252e+01	3.851542e+02	7.038822e+02	3.031604e+02	6.218881e+02	1.409404e+02	1.947152e+02	2.126860e+02	1.002059e+02
4.780000e+02	3.660349e+03	8.518321e+02	2.879612e+02	1.140601e+03	4.629751e+02	1.492890e+02	3.478600e+02	-5.225878e+02	2.395685e+02	4.839307e+01	4.216987e+02	8.105495e+02	3.300544e+02	7.189049e+02	1.642011e+02	2.469645e+02	2.160066e+02	1.445535e+02
4.790000e+02	3.645833e+03	9.606314e+02	3.611642e+02	1.293892e+03	5.243793e+02	1.421626e+02	3.721699e+02	-5.768936e+02	2.940903e+02	6.707444e+01	4.613588e+02	9.380582e+02	3.558368e+02	8.325357e+02	1.826946e+02	2.970820e+02	2.272926e+02	1.810951e+02
4.800000e+02	3.676745e+03	1.089215e+03	4.574926e+02	1.459699e+03	5.867558e+02	1.418582e+02	3.872070e+02	-6.234830e+02	3.606020e+02	9.689134e+01	5.034910e+02	1.080976e+03	3.787262e+02	9.562108e+02	1.930649e+02	3.422402e+02	2.445101e+02	2.097360e+02
4.810000e+02	3.761538e+03	1.226513e+03	5.684116e+02	1.624419e+03	6.428481e+02	1.506809e+02	3.968106e+02	-6.599670e+02	4.329859e+02	1.354267e+02	5.469171e+02	1.228379e+03	3.960434e+02	1.077505e+03	1.915513e+02	3.815563e+02	2.612854e+02	2.347399e+02
4.820000e+02	3.893431e+03	1.357271e+03	6.821367e+02	1.770114e+03	6.841814e+02	1.702397e+02	4.066299e+02	-6.830471e+02	5.028521e+02	1.792857e+02	5.895799e+02	1.365184e+03	4.049334e+02	1.180537e+03	1.755300e+02	4.156757e+02	2.684984e+02	2.628657e+02
4.830000e+02	4.051371e+03	1.465924e+03	7.861120e+02	1.878994e+03	7.033053e+02	2.007264e+02	4.227338e+02	-6.893120e+02	5.618952e+02	2.242179e+02	6.289122e+02	1.475424e+03	4.035728e+02	1.250084e+03	1.449819e+02	4.462251e+02	2.570721e+02	3.010429e+02
4.840000e+02	4.205732e+03	1.541265e+03	8.698256e+02	1.938728e+03	6.963428e+02	2.406426e+02	4.504773e+02	-6.765861e+02	6.042831e+02	2.655435e+02	6.627428e+02	1.546411e+03	3.923195e+02	1.275987e+03	1.031632e+02	4.753778e+02	2.209564e+02	3.544339e+02
4.850000e+02	4.326615e+03	1.579985e+03	9.270809e+02	1.946478e+03	6.647755e+02	2.870004e+02	4.937037e+02	-6.452318e+02	6.282133e+02	2.988685e+02	6.902307e+02	1.572312e+03	3.741683e+02	1.256249e+03	5.606371e+01	5.055714e+02	1.591954e+02	4.253757e+02
4.860000e+02	4.391797e+03	1.587534e+03	9.570331e+02	1.909929e+03	6.155723e+02	3.358747e+02	5.541561e+02	-5.987680e+02	6.360909e+02	3.209428e+02	7.122717e+02	1.555800e+03	3.541298e+02	1.197658e+03	1.077909e+01	5.392239e+02	7.633987e+01	5.131961e+02
4.870000e+02	4.391759e+03	1.575779e+03	9.636873e+02	1.844750e+03	5.593839e+02	3.831088e+02	6.309444e+02	-5.434211e+02	6.332908e+02	3.303968e+02	7.310630e+02	1.507108e+03	3.376435e+02	1.113687e+03	-2.656926e+01	5.782323e+02	-1.885631e+01	6.145304e+02
4.880000e+02	4.330501e+03	1.558239e+03	9.540313e+02	1.769316e+03	5.073071e+02	4.249638e+02	7.200575e+02	-4.866790e+02	6.259726e+02	3.280588e+02	7.489260e+02	1.440710e+03	3.286062e+02	1.020389e+03	-5.252767e+01	6.231524e+02	-1.158521e+02	7.236954e+02
4.890000e+02	4.222570e+03	1.544613e+03	9.353951e+02	1.698569e+03	4.673259e+02	4.585329e+02	8.141059e+02	-4.353615e+02	6.187591e+02	3.166358e+02	7.668548e+02	1.370756e+03	3.278121e+02	9.317122e+02	-6.696943e+01	6.722089e+02	-2.048885e+02	8.329046e+02
4.900000e+02	4.088015e+03	1.536665e+03	9.128905e+02	1.639304e+03	4.417070e+02	4.818126e+02	9.026107e+02	-3.939601e+02	6.131488e+02	2.997413e+02	7.834237e+02	1.306850e+03	3.324527e+02	8.558783e+02	-7.254351e+01	7.205396e+02	-2.788366e+02	9.324580e+02
4.910000e+02	3.947431e+03	1.527018e+03	8.877851e+02	1.588596e+03	4.263100e+02	4.934423e+02	9.731126e+02	-3.639088e+02	6.072682e+02	2.805165e+02	7.945748e+02	1.251693e+03	3.369007e+02	7.940187e+02	-7.323985e+01	7.601868e+02	-3.338793e+02	1.011274e+03
4.920000e+02	3.818752e+03	1.501406e+03	8.573600e+02	1.535935e+03	4.120806e+02	4.922701e+02	1.013152e+03	-3.440603e+02	5.970561e+02	2.603033e+02	7.944894e+02	1.201420e+03	3.345136e+02	7.414434e+02	-7.269835e+01	7.811853e+02	-3.691057e+02	1.058082e+03
4.930000e+02	3.716283e+03	1.443615e+03	8.162692e+02	1.468249e+03	3.882079e+02	4.770056e+02	1.012826e+03	-3.321304e+02	5.784008e+02	2.378678e+02	7.773400e+02	1.148399e+03	3.198478e+02	6.909065e+02	-7.289327e+01	7.736886e+02	-3.854802e+02	1.063271e+03
4.940000e+02	3.651316e+03	1.341386e+03	7.588473e+02	1.375884e+03	3.458196e+02	4.462124e+02	9.672983e+02	-3.264627e+02	5.493522e+02	2.094946e+02	7.393795e+02	1.085309e+03	2.905728e+02	6.365025e+02	-7.359461e+01	7.305803e+02	-3.847590e+02	1.020956e+03
4.950000e+02	3.633045e+03	1.191146e+03	6.814519e+02	1.257307e+03	2.808989e+02	3.987391e+02	8.784928e+02	-3.273426e+02	5.115046e+02	1.699469e+02	6.806664e+02	1.008794e+03	2.485128e+02	5.766401e+02	-7.269239e+01	6.497003e+02	-3.687989e+02	9.305581e+02
4.960000e+02	3.668645e+03	9.998905e+02	5.839761e+02	1.120797e+03	1.954170e+02	3.344707e+02	7.553584e+02	-3.372944e+02	4.699985e+02	1.139774e+02	6.058072e+02	9.212698e+02	1.995266e+02	5.149893e+02	-6.719502e+01	5.348647e+02	-3.394445e+02	7.972965e+02
4.970000e+02	3.762093e+03	7.836850e+02	4.701024e+02	9.825927e+02	9.638999e+01	2.551171e+02	6.124838e+02	-3.602150e+02	4.321733e+02	3.792914e+01	5.234141e+02	8.303166e+02	1.522765e+02	4.591792e+02	-5.453870e+01	3.952954e+02	-2.989021e+02	6.313712e+02
4.980000e+02	3.912201e+03	5.635915e+02	3.464764e+02	8.623799e+02	-6.588624e+00	1.647396e+02	4.673968e+02	-3.996543e+02	4.054359e+02	-5.895916e+01	4.444243e+02	7.461301e+02	1.162510e+02	4.179570e+02	-3.377462e+01	2.436976e+02	-2.502830e+02	4.461557e+02
4.990000e+02	4.110893e+03	3.608458e+02	2.214273e+02	7.779288e+02	-1.041730e+02	6.984394e+01	3.373090e+02	-4.568722e+02	3.951706e+02	-1.737427e+02	3.798373e+02	6.782989e+02	9.963167e+01	3.980935e+02	-6.233482e+00	9.372200e+01	-1.978920e+02	2.560430e+02
5.000000e+02	4.342773e+03	1.932462e+02	1.039047e+02	7.409512e+02	-1.892015e+02	-2.097066e+01	2.362367e+02	-5.293883e+02	4.034148e+02	-2.995093e+02	3.386314e+02	6.332924e+02	1.076610e+02	4.023223e+02	2.458987e+01	-4.230221e+01	-1.468968e+02	7.458794e+01
5.010000e+02	4.586612e+03	7.392899e+01	2.953649e+00	7.555575e+02	-2.570122e+02	-9.772398e+01	1.732487e+02	-6.105935e+02	4.286626e+02	-4.257078e+02	3.265065e+02	6.135463e+02	1.420135e+02	4.290537e+02	5.394174e+01	-1.547354e+02	-1.022750e+02	-8.671388e+01
5.020000e+02	4.818671e+03	1.237294e+01	-7.245467e+01	8.195118e+02	-3.042907e+02	-1.500520e+02	1.521483e+02	-6.906545e+02	4.667140e+02	-5.391674e+02	3.457203e+02	6.181989e+02	2.013151e+02	4.737941e+02	7.722515e+01	-2.369673e+02	-6.732235e+01	-2.190657e+02
5.030000e+02	5.017107e+03	1.628603e+01	-1.137443e+02	9.272767e+02	-3.274124e+02	-1.684496e+02	1.723655e+02	-7.585248e+02	5.121473e+02	-6.258902e+02	3.958084e+02	6.447794e+02	2.824994e+02	5.314708e+02	9.142778e+01	-2.850753e+02	-4.233685e+01	-3.167259e+02
5.040000e+02	5.166246e+03	9.260423e+01	-1.136634e+02	1.073156e+03	-3.215402e+02	-1.456946e+02	2.304289e+02	-8.044859e+02	5.598392e+02	-6.735013e+02	4.746330e+02	6.908212e+02	3.823370e+02	5.985256e+02	9.603029e+01	-2.973778e+02	-2.416298e+01	-3.773621e+02
5.050000e+02	5.259436e+03	2.463961e+02	-6.789007e+01	1.252948e+03	-2.813371e+02	-7.827693e+01	3.212775e+02	-8.224388e+02	6.060110e+02	-6.738998e+02	5.791467e+02	7.545474e+02	4.984020e+02	6.738031e+02	9.305384e+01	-2.743454e+02	-6.993293e+00	-4.024473e+02
5.060000e+02	5.299499e+03	4.777074e+02	2.310155e+01	1.463321e+03	-2.032481e+02	3.247076e+01	4.388854e+02	-8.112180e+02	6.484863e+02	-6.253835e+02	7.054907e+02	8.343182e+02	6.290043e+02	7.578321e+02	8.625049e+01	-2.189689e+02	1.571824e+01	-3.974558e+02
5.070000e+02	5.296542e+03	7.776483e+02	1.526361e+02	1.699271e+03	-8.837161e+01	1.798777e+02	5.761078e+02	-7.745338e+02	6.861446e+02	-5.335072e+02	8.484340e+02	9.271687e+02	7.721032e+02	8.508381e+02	7.978546e+01	-1.372771e+02	4.890171e+01	-3.714612e+02
5.080000e+02	5.263769e+03	1.125681e+03	3.076041e+02	1.950922e+03	5.551411e+01	3.522990e+02	7.240924e+02	-7.196238e+02	7.178715e+02	-4.102663e+02	1.000518e+03	1.027227e+03	9.236966e+02	9.504056e+02	7.694763e+01	-3.847287e+01	9.398192e+01	-3.358373e+02
5.090000e+02	5.212745e+03	1.489833e+03	4.697960e+02	2.201379e+03	2.139447e+02	5.343612e+02	8.718435e+02	-6.551286e+02	7.415315e+02	-2.717344e+02	1.151474e+03	1.124924e+03	1.076456e+03	1.049906e+03	7.937207e+01	6.574799e+01	1.481903e+02	-3.021014e+02
5.100000e+02	5.149805e+03	1.830565e+03	6.187307e+02	2.427012e+03	3.681157e+02	7.089341e+02	1.006495e+03	-5.889220e+02	7.535197e+02	-1.347881e+02	1.288473e+03	1.207652e+03	1.219361e+03	1.138541e+03	8.700233e+01	1.627730e+02	2.053352e+02	-2.793827e+02
5.110000e+02	5.074999e+03	2.107769e+03	7.354392e+02	2.600786e+03	4.989397e+02	8.595903e+02	1.114593e+03	-5.265482e+02	7.492442e+02	-1.380432e+01	1.397562e+03	1.261987e+03	1.338800e+03	1.203226e+03	9.869276e+01	2.411981e+02	2.577331e+02	-2.723036e+02
5.120000e+02	4.984026e+03	2.289277e+03	8.063385e+02	2.698105e+03	5.915198e+02	9.732747e+02	1.184321e+03	-4.706140e+02	7.244884e+02	8.185043e+01	1.466278e+03	1.276952e+03	1.421154e+03	1.231829e+03	1.131114e+02	2.928967e+02	2.986140e+02	-2.800465e+02
5.130000e+02	4.872499e+03	2.358665e+03	8.262122e+02	2.703660e+03	6.386659e+02	1.042814e+03	1.208246e+03	-4.211103e+02	6.771921e+02	1.490201e+02	1.486923e+03	1.247322e+03	1.456339e+03	1.216738e+03	1.295524e+02	3.144519e+02	3.242047e+02	-2.969827e+02
5.140000e+02	4.741037e+03	2.320177e+03	7.994528e+02	2.617116e+03	6.425182e+02	1.068717e+03	1.185842e+03	-3.763526e+02	6.089486e+02	1.905039e+02	1.459538e+03	1.175805e+03	1.441311e+03	1.157579e+03	1.484013e+02	3.076292e+02	3.348802e+02	-3.146282e+02
5.150000e+02	4.599360e+03	2.199213e+03	7.391122e+02	2.455579e+03	6.140386e+02	1.059600e+03	1.124970e+03	-3.341268e+02	5.255810e+02	2.135304e+02	1.393384e+03	1.073238e+03	1.382341e+03	1.062196e+03	1.712126e+02	2.789001e+02	3.351306e+02	-3.241693e+02
5.160000e+02	4.467968e+03	2.038004e+03	6.638953e+02	2.251656e+03	5.707776e+02	1.030734e+03	1.041609e+03	-2.926863e+02	4.364991e+02	2.273951e+02	1.306065e+03	9.565805e+02	1.295075e+03	9.455926e+02	2.005262e+02	2.382701e+02	3.325009e+02	-3.186116e+02
5.170000e+02	4.376768e+03	1.887484e+03	5.938536e+02	2.047372e+03	5.337183e+02	1.000785e+03	9.576839e+02	-2.513894e+02	3.529867e+02	2.408657e+02	1.220195e+03	8.452419e+02	1.202130e+03	8.271786e+02	2.395760e+02	1.977647e+02	3.359486e+02	-2.938444e+02
5.180000e+02	4.360913e+03	1.797559e+03	5.459839e+02	1.885694e+03	5.240440e+02	9.875796e+02	8.974236e+02	-2.108948e+02	2.859414e+02	2.600411e+02	1.158543e+03	7.568775e+02	1.128817e+03	7.271527e+02	2.919396e+02	1.698858e+02	3.541551e+02	-2.484436e+02
5.190000e+02	4.454721e+03	1.808374e+03	5.309880e+02	1.802159e+03	5.604109e+02	1.004244e+03	8.832049e+02	-1.729299e+02	2.437247e+02	2.872620e+02	1.139197e+03	7.039167e+02	1.098242e+03	6.629632e+02	3.610347e+02	1.662237e+02	3.941859e+02	-1.825938e+02
5.200000e+02	4.684735e+03	1.944490e+03	5.520321e+02	1.818821e+03	6.568659e+02	1.056950e+03	9.318400e+02	-1.397092e+02	2.306784e+02	3.213525e+02	1.172251e+03	6.917402e+02	1.127081e+03	6.465711e+02	4.493120e+02	1.962429e+02	4.606236e+02	-9.687395e+01
5.210000e+02	5.062967e+03	2.212478e+03	6.055761e+02	1.941503e+03	8.211632e+02	1.144730e+03	1.051870e+03	-1.131634e+02	2.465886e+02	3.589866e+02	1.258676e+03	7.187387e+02	1.222764e+03	6.828278e+02	5.570979e+02	2.661277e+02	5.550381e+02	8.338906e+00
5.220000e+02	5.581315e+03	2.601018e+03	6.835558e+02	2.159948e+03	1.053129e+03	1.260832e+03	1.241901e+03	-9.421894e+01	2.870603e+02	3.964949e+02	1.391037e+03	7.777741e+02	1.382174e+03	7.689119e+02	6.812836e+02	3.775649e+02	6.755682e+02	1.324153e+02
5.230000e+02	6.208326e+03	3.082071e+03	7.757657e+02	2.449718e+03	1.343018e+03	1.394534e+03	1.489808e+03	-8.240236e+01	3.445231e+02	4.312422e+02	1.555110e+03	8.581677e+02	1.591549e+03	8.946076e+02	8.143273e+02	5.265176e+02	8.165056e+02	2.730832e+02
5.240000e+02	6.889596e+03	3.612330e+03	8.714455e+02	2.774850e+03	1.670375e+03	1.532466e+03	1.772866e+03	-7.596393e+01	4.094931e+02	4.619522e+02	1.731564e+03	9.474093e+02	1.827439e+03	1.043286e+03	9.441614e+02	7.023536e+02	9.680284e+02	4.247610e+02
5.250000e+02	7.552872e+03	4.135473e+03	9.597340e+02	3.091190e+03	2.004405e+03	1.659285e+03	2.059290e+03	-7.251026e+01	4.717869e+02	4.879472e+02	1.897560e+03	1.032244e+03	2.058943e+03	1.193629e+03	1.055463e+03	8.879525e+02	1.116460e+03	5.775673e+02
5.260000e+02	8.118024e+03	4.586709e+03	1.029464e+03	3.350947e+03	2.306848e+03	1.758303e+03	2.311800e+03	-6.989536e+01	5.215634e+02	5.079003e+02	2.028728e+03	1.099359e+03	2.251585e+03	1.322218e+03	1.132321e+03	1.061398e+03	1.245458e+03	7.178328e+02
5.270000e+02	8.510515e+03	4.900887e+03	1.069236e+03	3.509039e+03	2.537732e+03	1.812912e+03	2.493363e+03	-6.697054e+01	5.502493e+02	5.189865e+02	2.102085e+03	1.136207e+03	2.372830e+03	1.406954e+03	1.161753e+03	1.199437e+03	1.338302e+03	8.303666e+02
5.280000e+02	8.675491e+03	5.023824e+03	1.068554e+03	3.530797e+03	2.663170e+03	1.809199e+03	2.574299e+03	-6.384393e+01	5.514628e+02	5.170907e+02	2.099883e+03	1.132398e+03	2.398396e+03	1.430914e+03	1.137066e+03	1.282191e+03	1.380986e+03	9.019603e+02
5.290000e+02	8.588797e+03	4.924453e+03	1.020064e+03	3.399397e+03	2.663266e+03	1.739248e+03	2.539044e+03	-6.154004e+01	5.219479e+02	4.981158e+02	2.013573e+03	1.081604e+03	2.317790e+03	1.385824e+03	1.059916e+03	1.297912e+03	1.365361e+03	9.249814e+02
5.300000e+02	8.261772e+03	4.603927e+03	9.221124e+02	3.120680e+03	2.537662e+03	1.603942e+03	2.390469e+03	-6.125405e+01	4.623317e+02	4.597806e+02	1.846520e+03	9.833667e+02	2.137310e+03	1.274159e+03	9.402856e+02	1.246308e+03	1.291360e+03	8.997539e+02
5.310000e+02	7.738438e+03	4.098050e+03	7.803797e+02	2.723330e+03	2.306684e+03	1.413997e+03	2.150203e+03	-6.359363e+01	3.773771e+02	4.030025e+02	1.614287e+03	8.439734e+02	1.879354e+03	1.109043e+03	7.942944e+02	1.139209e+03	1.167480e+03	8.348210e+02
5.320000e+02	7.086086e+03	3.471380e+03	6.076146e+02	2.253802e+03	2.007379e+03	1.188553e+03	1.854543e+03	-6.818596e+01	2.754562e+02	3.321583e+02	1.342056e+03	6.758003e+02	1.578000e+03	9.117463e+02	6.405525e+02	9.981476e+02	1.009235e+03	7.449579e+02
5.330000e+02	6.382255e+03	2.804209e+03	4.213169e+02	1.767146e+03	1.685375e+03	9.516184e+02	1.546919e+03	-7.381616e+01	1.672230e+02	2.540939e+02	1.059854e+03	4.951326e+02	1.272012e+03	7.072931e+02	4.962109e+02	8.493940e+02	8.359841e+02	6.475957e+02
5.340000e+02	5.701890e+03	2.176132e+03	2.401415e+02	1.316289e+03	1.384877e+03	7.274772e+02	1.268915e+03	-7.897961e+01	6.378462e+01	1.763568e+02	7.969375e+02	3.191203e+02	9.971669e+02	5.193514e+02	3.738848e+02	7.177938e+02	6.670848e+02	5.588013e+02
5.350000e+02	5.107844e+03	1.650990e+03	8.032370e+01	9.427094e+02	1.139632e+03	5.364951e+02	1.052186e+03	-8.252527e+01	-2.513200e+01	1.054557e+02	5.769363e+02	1.628481e+02	7.798603e+02	3.657734e+02	2.801793e+02	6.211462e+02	5.184876e+02	4.900015e+02
5.360000e+02	4.646147e+03	1.267232e+03	-4.667859e+01	6.707872e+02	9.673204e+02	3.924525e+02	9.132564e+02	-8.403678e+01	-9.253661e+01	4.585806e+01	4.148638e+02	3.735714e+01	6.334292e+02	2.559235e+02	2.159177e+02	5.666615e+02	4.006599e+02	4.462778e+02
5.370000e+02	4.345546e+03	1.035664e+03	-1.347602e+02	5.067194e+02	8.685880e+02	3.018554e+02	8.522328e+02	-8.374448e+01	-1.347768e+02	1.669946e-02	3.163992e+02	-5.101691e+01	5.577355e+02	1.903201e+02	1.776365e+02	5.503936e+02	3.181951e+02	4.264984e+02
5.380000e+02	4.219399e+03	9.440656e+02	-1.821560e+02	4.415223e+02	8.305045e+02	2.649148e+02	8.553491e+02	-8.200859e+01	-1.513523e+02	-3.080357e+01	2.791001e+02	-1.001487e+02	5.416702e+02	1.624218e+02	1.596392e+02	5.596303e+02	2.708748e+02	4.249762e+02
5.390000e+02	4.267775e+03	9.661924e+02	-1.895788e+02	4.566367e+02	8.328799e+02	2.774000e+02	9.002451e+02	-7.864291e+01	-1.440873e+02	-4.549126e+01	2.947969e+02	-1.109373e+02	5.675730e+02	1.618391e+02	1.559308e+02	5.773534e+02	2.555271e+02	4.339346e+02
5.400000e+02	4.478494e+03	1.071817e+03	-1.583801e+02	5.303318e+02	8.552057e+02	3.325000e+02	9.623116e+02	-7.245609e+01	-1.158897e+02	-4.249009e+01	3.523398e+02	-8.592548e+01	6.162561e+02	1.779911e+02	1.615756e+02	5.873212e+02	2.678851e+02	4.459241e+02
5.410000e+02	4.827305e+03	1.234830e+03	-8.937997e+01	6.433217e+02	8.820807e+02	4.221092e+02	1.020392e+03	-6.132022e+01	-6.936089e+01	-2.001866e+01	4.400551e+02	-2.806122e+01	6.713816e+02	2.032655e+02	1.733068e+02	5.782641e+02	3.038171e+02	4.554911e+02
5.420000e+02	5.278601e+03	1.437645e+03	1.737656e+01	7.825161e+02	9.058162e+02	5.373996e+02	1.060584e+03	-4.285585e+01	-5.572816e+00	2.294989e+01	5.475185e+02	6.023097e+01	7.222836e+02	2.349967e+02	1.894584e+02	5.461346e+02	3.596823e+02	4.597987e+02
5.430000e+02	5.788374e+03	1.671645e+03	1.620346e+02	9.424093e+02	9.261075e+02	6.689080e+02	1.077608e+03	-1.554226e+01	7.662769e+01	8.540756e+01	6.664802e+02	1.775756e+02	7.648323e+02	2.759284e+02	2.094337e+02	4.941083e+02	4.320001e+02	4.583576e+02
5.440000e+02	6.310087e+03	1.934677e+03	3.438080e+02	1.124117e+03	9.477128e+02	8.065188e+02	1.073950e+03	2.015331e+01	1.804437e+02	1.633649e+02	7.909352e+02	3.236535e+02	8.004619e+02	3.331813e+02	2.329790e+02	4.307967e+02	5.169173e+02	4.523338e+02
5.450000e+02	6.802495e+03	2.227116e+03	5.596402e+02	1.332480e+03	9.775558e+02	9.396641e+02	1.057490e+03	6.108178e+01	3.098942e+02	2.497467e+02	9.164669e+02	4.985575e+02	8.339215e+02	4.160135e+02	2.595204e+02	3.675735e+02	6.099839e+02	4.439197e+02
5.460000e+02	7.236891e+03	2.547954e+03	8.029196e+02	1.572005e+03	1.022427e+03	1.057888e+03	1.038523e+03	1.014666e+02	4.676358e+02	3.352844e+02	1.039153e+03	7.014523e+02	8.705518e+02	5.328524e+02	2.877695e+02	3.159205e+02	7.065089e+02	4.359971e+02
5.470000e+02	7.600966e+03	2.891859e+03	1.062502e+03	1.842668e+03	1.087747e+03	1.151768e+03	1.026965e+03	1.337584e+02	6.523414e+02	4.101607e+02	1.154479e+03	9.287428e+02	9.139255e+02	6.881912e+02	3.157220e+02	2.853601e+02	8.023904e+02	4.319782e+02
5.480000e+02	7.897573e+03	3.247664e+03	1.322372e+03	2.136781e+03	1.177121e+03	1.214063e+03	1.030292e+03	1.500852e+02	8.564762e+02	4.658964e+02	1.256755e+03	1.172287e+03	9.644942e+02	8.800282e+02	3.410488e+02	2.821277e+02	8.949978e+02	4.355235e+02
5.490000e+02	8.138782e+03	3.598423e+03	1.562387e+03	2.437967e+03	1.292067e+03	1.240912e+03	1.052448e+03	1.439440e+02	1.065440e+03	4.969476e+02	1.339428e+03	1.418443e+03	1.019525e+03	1.098542e+03	3.617216e+02	3.084861e+02	9.835863e+02	4.499192e+02
5.500000e+02	8.337576e+03	3.923033e+03	1.760462e+03	2.722862e+03	1.431436e+03	1.232782e+03	1.093688e+03	1.117607e+02	1.258810e+03	5.016512e+02	1.396316e+03	1.648701e+03	1.074163e+03	1.326550e+03	3.765824e+02	3.625597e+02	1.068882e+03	4.771742e+02
5.510000e+02	8.500364e+03	4.199130e+03	1.896226e+03	2.965291e+03	1.590480e+03	1.194824e+03	1.151077e+03	5.400795e+01	1.413820e+03	4.824055e+02	1.423382e+03	1.842218e+03	1.123076e+03	1.541914e+03	3.855431e+02	4.386607e+02	1.151825e+03	5.171532e+02
5.520000e+02	8.622964e+03	4.406632e+03	1.955486e+03	3.141815e+03	1.759966e+03	1.136333e+03	1.219283e+03	-2.436155e+01	1.510328e+03	4.451578e+02	1.420328e+03	1.979848e+03	1.161970e+03	1.721492e+03	3.892494e+02	5.281106e+02	1.231861e+03	5.671139e+02
5.530000e+02	8.691289e+03	4.531005e+03	1.934203e+03	3.236951e+03	1.925941e+03	1.069205e+03	1.291325e+03	-1.143354e+02	1.535853e+03	3.983497e+02	1.391300e+03	2.048539e+03	1.188416e+03	1.845656e+03	3.883328e+02	6.204713e+02	1.305475e+03	6.218375e+02
5.540000e+02	8.686398e+03	4.565346e+03	1.840474e+03	3.246446e+03	2.070664e+03	1.005696e+03	1.359159e+03	-2.041739e+02	1.488981e+03	3.514927e+02	1.344308e+03	2.044648e+03	1.201803e+03	1.902144e+03	3.826484e+02	7.049564e+02	1.365712e+03	6.742844e+02
5.550000e+02	8.592327e+03	4.510913e+03	1.693529e+03	3.177718e+03	2.174884e+03	9.560770e+02	1.414239e+03	-2.814987e+02	1.379949e+03	3.135792e+02	1.289523e+03	1.975027e+03	1.202696e+03	1.888202e+03	3.709891e+02	7.717421e+02	1.403146e+03	7.165401e+02
5.560000e+02	8.404386e+03	4.376348e+03	1.519806e+03	3.047663e+03	2.221188e+03	9.269674e+02	1.448353e+03	-3.357079e+02	1.228191e+03	2.916141e+02	1.237107e+03	1.855513e+03	1.192155e+03	1.810563e+03	3.515680e+02	8.130000e+02	1.408191e+03	7.408240e+02
5.570000e+02	8.135303e+03	4.176313e+03	1.347334e+03	2.878922e+03	2.197708e+03	9.208878e+02	1.454930e+03	-3.600749e+02	1.057716e+03	2.896170e+02	1.195379e+03	1.707407e+03	1.171520e+03	1.683549e+03	3.231622e+02	8.236600e+02	1.374050e+03	7.404501e+02
5.580000e+02	7.816966e+03	3.930237e+03	1.200269e+03	2.695987e+03	2.101243e+03	9.371161e+02	1.430738e+03	-3.528949e+02	8.918775e+02	3.083912e+02	1.169924e+03	1.553162e+03	1.142829e+03	1.526069e+03	2.864238e+02	8.020135e+02	1.299231e+03	7.107251e+02
5.590000e+02	7.496549e+03	3.661384e+03	1.095212e+03	2.522138e+03	1.938922e+03	9.733899e+02	1.377452e+03	-3.173206e+02	7.490728e+02	3.461394e+02	1.163730e+03	1.412531e+03	1.109611e+03	1.358414e+03	2.447010e+02	7.502024e+02	1.188720e+03	6.497665e+02
5.600000e+02	7.227511e+03	3.395874e+03	1.040041e+03	2.377452e+03	1.727885e+03	1.027627e+03	1.302380e+03	-2.599930e+02	6.403619e+02	3.996796e+02	1.177937e+03	1.300033e+03	1.077424e+03	1.199520e+03	2.038827e+02	6.744326e+02	1.053453e+03	5.591444e+02
5.610000e+02	7.057651e+03	3.160911e+03	1.034881e+03	2.277398e+03	1.492949e+03	1.098815e+03	1.217667e+03	-1.890102e+02	5.691479e+02	4.657338e+02	1.212467e+03	1.223890e+03	1.053512e+03	1.064936e+03	1.711830e+02	5.845868e+02	9.083625e+02	4.441784e+02
5.620000e+02	7.017394e+03	2.981652e+03	1.074107e+03	2.231371e+03	1.262680e+03	1.186564e+03	1.137814e+03	-1.119816e+02	5.324081e+02	5.416997e+02	1.265964e+03	1.186087e+03	1.045288e+03	9.654112e+02	1.532285e+02	4.929509e+02	7.697302e+02	3.137272e+02
5.630000e+02	7.111414e+03	2.876728e+03	1.148203e+03	2.240890e+03	1.064600e+03	1.289460e+03	1.075981e+03	-3.480660e+01	5.226681e+02	6.255356e+02	1.334952e+03	1.183008e+03	1.057886e+03	9.059417e+02	1.540998e+02	4.120584e+02	6.525432e+02	1.793875e+02
5.640000e+02	7.315698e+03	2.853368e+03	1.244840e+03	2.297947e+03	9.203900e+02	1.402948e+03	1.040209e+03	3.854853e+01	5.300287e+02	7.148123e+02	1.412711e+03	1.206290e+03	1.091661e+03	8.852396e+02	1.740029e+02	3.520749e+02	5.683173e+02	5.413008e+01
5.650000e+02	7.580860e+03	2.903805e+03	1.349306e+03	2.384625e+03	8.420443e+02	1.517868e+03	1.030915e+03	1.054323e+02	5.438890e+02	8.054177e+02	1.488778e+03	1.243872e+03	1.140756e+03	8.958497e+02	2.090363e+02	3.184656e+02	5.235818e+02	-4.948810e+01
5.660000e+02	7.841238e+03	3.004788e+03	1.444942e+03	2.475042e+03	8.298617e+02	1.620591e+03	1.040699e+03	1.635226e+02	5.543306e+02	8.906123e+02	1.549810e+03	1.281418e+03	1.193628e+03	9.252340e+02	2.521559e+02	3.107220e+02	5.191437e+02	-1.212869e+02
5.670000e+02	8.028305e+03	3.121291e+03	1.514303e+03	2.539978e+03	8.729120e+02	1.695104e+03	1.056689e+03	2.100274e+02	5.532687e+02	9.610348e+02	1.581999e+03	1.304274e+03	1.235707e+03	9.579803e+02	2.950679e+02	3.226201e+02	5.502965e+02	-1.552396e+02
5.680000e+02	8.085870e+03	3.214047e+03	1.541298e+03	2.553261e+03	9.520740e+02	1.726550e+03	1.064629e+03	2.414747e+02	5.354159e+02	1.005883e+03	1.574388e+03	1.299821e+03	1.253441e+03	9.788733e+02	3.304852e+02	3.439627e+02	6.081162e+02	-1.506305e+02
5.690000e+02	7.983678e+03	3.248997e+03	1.513994e+03	2.498080e+03	1.044981e+03	1.705052e+03	1.053270e+03	2.542094e+02	4.989564e+02	1.015038e+03	1.521952e+03	1.259783e+03	1.238298e+03	9.761281e+02	3.540702e+02	3.632563e+02	6.817296e+02	-1.122093e+02
5.700000e+02	7.725742e+03	3.205823e+03	1.427289e+03	2.371142e+03	1.131542e+03	1.628538e+03	1.017496e+03	2.454210e+02	4.457355e+02	9.815539e+02	1.427252e+03	1.181866e+03	1.189276e+03	9.438887e+02	3.654665e+02	3.705123e+02	7.610341e+02	-4.917536e+01
5.710000e+02	7.350571e+03	3.082931e+03	1.284611e+03	2.183347e+03	1.198460e+03	1.503633e+03	9.592731e+02	2.143327e+02	3.808306e+02	9.037804e+02	1.300065e+03	1.070276e+03	1.113071e+03	8.832816e+02	3.681149e+02	3.594192e+02	8.390439e+02	2.683738e+01
5.720000e+02	6.922603e+03	2.897520e+03	1.098044e+03	1.956937e+03	1.241524e+03	1.344449e+03	8.863922e+02	1.631227e+02	3.115408e+02	7.865040e+02	1.155137e+03	9.349200e+02	1.022017e+03	8.017999e+02	3.679435e+02	3.284459e+02	9.130807e+02	1.042818e+02
5.730000e+02	6.516918e+03	2.681005e+03	8.867247e+02	1.720221e+03	1.265277e+03	1.169708e+03	8.098125e+02	9.721457e+01	2.460150e+02	6.407105e+02	1.008894e+03	7.895090e+02	9.307117e+02	7.113265e+02	3.714095e+02	2.808134e+02	9.844651e+02	1.740725e+02
5.740000e+02	6.201574e+03	2.471432e+03	6.737365e+02	1.501602e+03	1.280508e+03	9.991002e+02	7.407449e+02	2.473585e+01	1.918204e+02	4.819170e+02	8.761652e+02	6.489998e+02	8.526029e+02	6.254379e+02	3.835756e+02	2.235598e+02	1.056949e+03	2.312239e+02
5.750000e+02	6.022712e+03	2.305102e+03	4.820983e+02	1.324487e+03	1.300605e+03	8.497712e+02	6.884432e+02	-4.484007e+01	1.547226e+02	3.273768e+02	7.677992e+02	5.269378e+02	7.975507e+02	5.566902e+02	4.068518e+02	1.660467e+02	1.134559e+03	2.754017e+02
5.760000e+02	5.996494e+03	2.209421e+03	3.306380e+02	1.204073e+03	1.337871e+03	7.336998e+02	6.591836e+02	-1.026091e+02	1.378476e+02	1.927914e+02	6.896322e+02	4.332467e+02	7.708281e+02	5.144439e+02	4.407347e+02	1.182729e+02	1.219599e+03	3.103601e+02
5.770000e+02	6.109594e+03	2.198440e+03	2.306967e+02	1.146386e+03	1.400668e+03	6.564398e+02	6.564000e+02	-1.422330e+02	1.413290e+02	8.936859e+01	6.427882e+02	3.729293e+02	7.734593e+02	5.036020e+02	4.824751e+02	8.932646e+01	1.311343e+03	3.425274e+02
5.780000e+02	6.327286e+03	2.271840e+03	1.845488e+02	1.149423e+03	1.491942e+03	6.173848e+02	6.815992e+02	-1.614338e+02	1.625107e+02	2.203888e+01	6.249617e+02	3.459822e+02	8.034438e+02	5.244663e+02	5.282870e+02	8.625091e+01	1.405692e+03	3.792018e+02
5.790000e+02	6.606085e+03	2.417466e+03	1.860937e+02	1.205885e+03	1.609338e+03	6.113745e+02	7.355252e+02	-1.624747e+02	1.967518e+02	-1.065755e+01	6.321623e+02	3.485679e+02	8.573214e+02	5.737292e+02	5.745931e+02	1.134908e+02	1.495848e+03	4.268790e+02
5.800000e+02	6.906954e+03	2.616698e+03	2.237430e+02	1.306717e+03	1.746821e+03	6.311154e+02	8.190305e+02	-1.513934e+02	2.387598e+02	-1.501638e+01	6.603777e+02	3.751358e+02	9.315853e+02	6.463458e+02	6.188927e+02	1.728964e+02	1.573926e+03	4.901267e+02
5.810000e+02	7.205203e+03	2.851085e+03	2.846570e+02	1.444352e+03	1.897292e+03	6.696380e+02	9.332026e+02	-1.361567e+02	2.841539e+02	5.034801e-01	7.066804e+02	4.208130e+02	1.023543e+03	7.376782e+02	6.600541e+02	2.640658e+02	1.633227e+03	5.711764e+02
5.820000e+02	7.494346e+03	3.107963e+03	3.588873e+02	1.614512e+03	2.055251e+03	7.219868e+02	1.078513e+03	-1.242821e+02	3.307248e+02	2.816291e+01	7.694625e+02	4.831687e+02	1.131348e+03	8.450569e+02	6.980480e+02	3.846865e+02	1.670564e+03	6.701021e+02
5.830000e+02	7.783015e+03	3.382802e+03	4.418981e+02	1.815691e+03	2.218396e+03	7.856216e+02	1.253124e+03	-1.206627e+02	3.787855e+02	6.311328e+01	8.477212e+02	5.625602e+02	1.253135e+03	9.679767e+02	7.332993e+02	5.306138e+02	1.687780e+03	7.852378e+02
5.840000e+02	8.086251e+03	3.677156e+03	5.345224e+02	2.046301e+03	2.387354e+03	8.595483e+02	1.450952e+03	-1.262443e+02	4.302554e+02	1.042679e+02	9.396620e+02	6.607660e+02	1.385539e+03	1.106646e+03	7.659157e+02	6.956693e+02	1.691682e+03	9.134745e+02
5.850000e+02	8.414545e+03	3.993019e+03	6.404873e+02	2.300635e+03	2.563573e+03	9.427814e+02	1.660409e+03	-1.378895e+02	4.866669e+02	1.538216e+02	1.041228e+03	7.783761e+02	1.522264e+03	1.259415e+03	7.950806e+02	8.714474e+02	1.692122e+03	1.050288e+03
5.860000e+02	8.764982e+03	4.326305e+03	7.627435e+02	2.565653e+03	2.746348e+03	1.033068e+03	1.864796e+03	-1.493551e+02	5.468924e+02	2.158524e+02	1.145357e+03	9.120978e+02	1.653560e+03	1.420303e+03	8.188571e+02	1.047579e+03	1.698764e+03	1.189647e+03
5.870000e+02	9.118203e+03	4.662907e+03	9.003818e+02	2.820641e+03	2.930535e+03	1.126658e+03	2.044784e+03	-1.529816e+02	6.057178e+02	2.946655e+02	1.242597e+03	1.053363e+03	1.767283e+03	1.578051e+03	8.345281e+02	1.212789e+03	1.717740e+03	1.324158e+03
5.880000e+02	9.442534e+03	4.979692e+03	1.047598e+03	3.040644e+03	3.106217e+03	1.219309e+03	2.182571e+03	-1.415409e+02	6.541697e+02	3.934295e+02	1.323138e+03	1.189138e+03	1.851511e+03	1.717513e+03	8.393896e+02	1.356690e+03	1.749521e+03	1.445716e+03
5.890000e+02	9.703510e+03	5.250276e+03	1.195092e+03	3.202673e+03	3.260596e+03	1.307922e+03	2.266364e+03	-1.097402e+02	6.817609e+02	5.133319e+02	1.379551e+03	1.304831e+03	1.897847e+03	1.823129e+03	8.317028e+02	1.471774e+03	1.788817e+03	1.546649e+03
5.900000e+02	9.874638e+03	5.452862e+03	1.333064e+03	3.292075e+03	3.381186e+03	1.391791e+03	2.293375e+03	-5.505192e+01	6.798893e+02	6.531760e+02	1.408992e+03	1.388115e+03	1.903966e+03	1.883090e+03	8.113952e+02	1.554759e+03	1.826421e+03	1.620948e+03
5.910000e+02	9.944830e+03	5.576279e+03	1.454266e+03	3.306109e+03	3.458688e+03	1.472580e+03	2.269927e+03	2.223723e+01	6.450148e+02	8.092519e+02	1.413726e+03	1.432027e+03	1.874087e+03	1.892389e+03	7.801891e+02	1.606598e+03	1.852084e+03	1.665026e+03
5.920000e+02	9.919781e+03	5.621440e+03	1.555752e+03	3.253088e+03	3.488222e+03	1.552942e+03	2.208460e+03	1.196687e+02	5.802820e+02	9.754707e+02	1.399622e+03	1.436082e+03	1.817011e+03	1.853471e+03	7.410974e+02	1.630988e+03	1.857227e+03	1.677616e+03
5.930000e+02	9.817655e+03	5.598126e+03	1.638916e+03	3.147783e+03	3.468593e+03	1.634581e+03	2.122659e+03	2.337083e+02	4.949582e+02	1.143958e+03	1.373363e+03	1.405207e+03	1.742581e+03	1.774424e+03	6.975453e+02	1.632035e+03	1.836550e+03	1.658900e+03
5.940000e+02	9.661981e+03	5.519560e+03	1.708347e+03	3.005700e+03	3.400522e+03	1.717029e+03	2.022885e+03	3.609532e+02	4.020164e+02	1.306330e+03	1.339861e+03	1.347392e+03	1.658311e+03	1.665842e+03	6.525676e+02	1.612185e+03	1.788328e+03	1.609400e+03
5.950000e+02	9.475297e+03	5.398273e+03	1.770503e+03	2.839274e+03	3.285335e+03	1.798020e+03	1.913947e+03	4.990677e+02	3.149267e+02	1.455576e+03	1.301254e+03	1.271434e+03	1.567843e+03	1.538022e+03	6.084755e+02	1.571502e+03	1.713823e+03	1.529379e+03
5.960000e+02	9.275756e+03	5.245504e+03	1.832902e+03	2.657677e+03	3.125261e+03	1.875388e+03	1.796061e+03	6.471166e+02	2.448660e+02	1.588036e+03	1.257966e+03	1.185785e+03	1.471895e+03	1.399712e+03	5.671090e+02	1.508708e+03	1.616542e+03	1.419224e+03
5.970000e+02	9.076693e+03	5.073885e+03	1.903785e+03	2.469612e+03	2.925360e+03	1.949389e+03	1.668227e+03	8.051493e+02	1.991476e+02	1.704636e+03	1.211046e+03	1.098635e+03	1.370979e+03	1.258566e+03	5.304434e+02	1.423474e+03	1.501874e+03	1.280764e+03
5.980000e+02	8.887595e+03	4.900841e+03	1.991659e+03	2.286682e+03	2.695888e+03	2.023980e+03	1.532067e+03	9.731676e+02	1.809863e+02	1.810671e+03	1.164281e+03	1.018491e+03	1.268192e+03	1.122401e+03	5.010808e+02	1.318757e+03	1.377117e+03	1.118867e+03
5.990000e+02	8.714794e+03	4.749472e+03	2.104086e+03	2.124571e+03	2.453319e+03	2.106007e+03	1.393994e+03	1.149882e+03	1.901605e+02	1.913924e+03	1.124587e+03	9.542037e+02	1.170368e+03	9.999832e+02	4.821860e+02	1.201910e+03	1.251395e+03	9.424143e+02
6.000000e+02	8.561270e+03	4.644947e+03	2.245567e+03	2.000567e+03	2.218688e+03	2.202345e+03	1.264559e+03	1.331763e+03	2.239301e+02	2.021634e+03	1.100157e+03	9.138024e+02	1.086765e+03	9.004088e+02	4.767008e+02	1.083848e+03	1.134825e+03	7.638951e+02
6.010000e+02	8.426070e+03	4.606934e+03	2.415034e+03	1.928079e+03	2.013156e+03	2.316046e+03	1.155255e+03	1.512759e+03	2.777484e+02	2.137283e+03	1.097013e+03	9.022745e+02	1.025806e+03	8.310660e+02	4.860745e+02	9.764929e+02	1.036650e+03	5.974649e+02
6.020000e+02	8.304266e+03	4.640971e+03	2.603933e+03	1.910617e+03	1.852221e+03	2.443104e+03	1.074347e+03	1.684719e+03	3.456631e+02	2.258267e+03	1.115541e+03	9.192137e+02	9.914050e+02	7.950763e+02	5.090723e+02	8.895102e+02	9.626976e+02	4.560131e+02
6.030000e+02	8.187846e+03	4.732676e+03	2.795824e+03	1.938206e+03	1.740855e+03	2.571230e+03	1.023699e+03	1.838278e+03	4.206080e+02	2.375213e+03	1.148701e+03	9.575453e+02	9.806632e+02	7.895058e+02	5.412856e+02	8.276825e+02	9.131604e+02	3.482771e+02
6.040000e+02	8.067205e+03	4.847930e+03	2.968088e+03	1.988294e+03	1.671757e+03	2.681318e+03	9.980306e+02	1.963857e+03	4.948711e+02	2.473213e+03	1.182916e+03	1.004229e+03	9.840677e+02	8.053803e+02	5.757226e+02	7.899264e+02	8.818197e+02	2.770832e+02
6.050000e+02	7.932492e+03	4.939828e+03	3.095640e+03	2.031221e+03	1.627632e+03	2.751326e+03	9.868085e+02	2.052594e+03	5.608850e+02	2.534752e+03	1.201498e+03	1.043045e+03	9.881792e+02	8.297256e+02	6.043956e+02	7.702346e+02	8.573871e+02	2.393355e+02
6.060000e+02	7.774338e+03	4.960478e+03	3.155921e+03	2.038362e+03	1.586754e+03	2.761502e+03	9.778309e+02	2.097260e+03	6.122359e+02	2.543682e+03	1.189416e+03	1.058660e+03	9.797051e+02	8.489490e+02	6.203655e+02	7.600115e+02	8.267333e+02	2.276492e+02
6.070000e+02	7.584111e+03	4.873739e+03	3.133915e+03	1.989960e+03	1.529720e+03	2.699430e+03	9.609165e+02	2.093304e+03	6.446020e+02	2.489311e+03	1.137646e+03	1.040611e+03	9.493530e+02	8.523170e+02	6.194822e+02	7.507977e+02	7.789140e+02	2.328791e+02
6.080000e+02	7.354310e+03	4.664631e+03	3.025809e+03	1.879910e+03	1.444917e+03	2.563423e+03	9.303130e+02	2.039989e+03	6.563020e+02	2.369505e+03	1.045603e+03	9.858190e+02	8.940955e+02	8.343113e+02	6.011944e+02	7.363952e+02	7.085138e+02	2.465380e+02
6.090000e+02	7.079727e+03	4.342486e+03	2.840161e+03	1.716138e+03	1.330958e+03	2.363257e+03	8.852112e+02	1.941291e+03	6.482814e+02	2.191878e+03	9.209342e+02	8.988699e+02	8.172721e+02	7.952075e+02	5.682216e+02	7.138323e+02	6.171177e+02	2.623132e+02
6.100000e+02	6.759539e+03	3.937335e+03	2.596162e+03	1.516986e+03	1.195710e+03	2.118056e+03	8.286499e+02	1.806032e+03	6.235795e+02	1.972582e+03	7.770094e+02	7.901295e+02	7.268606e+02	7.399804e+02	5.253786e+02	6.831759e+02	5.125258e+02	2.764201e+02
6.110000e+02	6.399846e+03	3.491401e+03	2.319472e+03	1.305429e+03	1.052881e+03	1.852020e+03	7.656887e+02	1.646903e+03	5.865082e+02	1.732963e+03	6.291933e+02	6.725688e+02	6.328641e+02	6.762394e+02	4.781581e+02	6.466323e+02	4.062412e+02	2.870728e+02
6.120000e+02	6.015743e+03	3.049050e+03	2.036913e+03	1.103385e+03	9.178764e+02	1.589339e+03	7.017863e+02	1.478412e+03	5.418429e+02	1.495069e+03	4.912825e+02	5.585008e+02	5.448886e+02	6.121067e+02	4.316668e+02	6.075172e+02	3.103518e+02	2.936625e+02
6.130000e+02	5.631944e+03	2.648607e+03	1.771655e+03	9.279532e+02	8.045329e+02	1.349804e+03	6.419649e+02	1.314356e+03	4.942765e+02	1.277378e+03	3.731928e+02	4.572988e+02	4.706583e+02	5.547643e+02	3.902156e+02	5.695394e+02	2.349869e+02	2.962002e+02
6.140000e+02	5.281420e+03	2.318206e+03	1.540305e+03	7.903245e+02	7.236499e+02	1.146325e+03	5.908129e+02	1.165655e+03	4.482366e+02	1.092068e+03	2.803638e+02	3.746496e+02	4.156788e+02	5.099646e+02	3.574638e+02	5.365571e+02	1.870876e+02	2.953053e+02
6.150000e+02	5.002171e+03	2.076047e+03	1.352530e+03	6.969998e+02	6.832413e+02	9.848155e+02	5.529596e+02	1.039272e+03	4.079926e+02	9.445368e+02	2.146672e+02	3.132582e+02	3.837454e+02	4.823366e+02	3.367344e+02	5.126817e+02	1.705559e+02	2.926575e+02
6.160000e+02	4.832804e+03	1.933598e+03	1.212858e+03	6.521100e+02	6.896807e+02	8.660931e+02	5.334864e+02	9.384571e+02	3.778247e+02	8.350324e+02	1.761225e+02	2.744005e+02	3.777131e+02	4.759913e+02	3.310835e+02	5.024264e+02	1.872526e+02	2.915547e+02
6.170000e+02	4.807676e+03	1.899296e+03	1.123454e+03	6.593995e+02	7.485818e+02	7.887401e+02	5.378193e+02	8.639875e+02	3.619730e+02	7.614800e+02	1.645560e+02	2.594661e+02	3.999367e+02	4.948471e+02	3.429103e+02	5.105596e+02	2.380223e+02	2.971062e+02
6.180000e+02	4.952089e+03	1.980266e+03	1.086323e+03	7.227434e+02	8.644795e+02	7.516169e+02	5.709029e+02	8.156062e+02	3.641668e+02	7.221560e+02	1.804773e+02	2.707171e+02	4.520291e+02	5.422692e+02	3.732000e+02	5.414422e+02	3.230393e+02	3.156803e+02
6.190000e+02	5.277660e+03	2.180716e+03	1.103759e+03	8.448087e+02	1.039036e+03	7.549270e+02	6.357668e+02	7.928969e+02	3.867482e+02	7.170105e+02	2.248133e+02	3.108623e+02	5.339484e+02	6.199977e+02	4.207513e+02	5.978502e+02	4.411894e+02	3.534833e+02
6.200000e+02	5.777984e+03	2.497426e+03	1.176781e+03	1.024364e+03	1.268327e+03	7.994117e+02	7.318829e+02	7.951954e+02	4.296812e+02	7.470998e+02	2.976085e+02	3.815857e+02	6.427796e+02	7.267570e+02	4.818129e+02	6.795706e+02	5.887623e+02	4.145169e+02
6.210000e+02	6.425308e+03	2.914456e+03	1.302405e+03	1.253451e+03	1.540429e+03	8.841109e+02	8.538948e+02	8.207443e+02	4.899101e+02	8.124945e+02	3.962426e+02	4.816601e+02	7.717910e+02	8.572087e+02	5.504141e+02	7.822779e+02	7.581582e+02	4.985178e+02
6.220000e+02	7.169685e+03	3.399977e+03	1.471255e+03	1.515849e+03	1.834656e+03	1.003825e+03	9.913032e+02	8.657392e+02	5.614886e+02	9.097670e+02	5.139821e+02	6.055158e+02	9.103320e+02	1.001866e+03	6.193728e+02	8.972443e+02	9.374206e+02	5.996706e+02
6.230000e+02	7.942363e+03	3.907534e+03	1.666970e+03	1.787864e+03	2.123323e+03	1.147607e+03	1.129464e+03	9.239777e+02	6.365984e+02	1.030372e+03	6.396486e+02	7.429912e+02	1.044871e+03	1.148214e+03	6.816452e+02	1.012228e+03	1.111104e+03	7.067549e+02
6.240000e+02	8.664393e+03	4.382227e+03	1.867982e+03	2.041568e+03	2.375867e+03	1.299193e+03	1.251845e+03	9.874574e+02	7.071614e+02	1.160821e+03	7.588158e+02	8.805239e+02	1.161041e+03	1.282749e+03	7.315120e+02	1.113473e+03	1.262405e+03	8.049437e+02
6.250000e+02	9.259636e+03	4.770095e+03	2.051191e+03	2.249594e+03	2.564180e+03	1.439457e+03	1.343024e+03	1.047737e+03	7.664546e+02	1.284737e+03	8.563493e+02	1.003453e+03	1.246137e+03	1.393241e+03	7.651827e+02	1.188304e+03	1.375886e+03	8.788579e+02
6.260000e+02	9.669258e+03	5.027669e+03	2.196177e+03	2.390007e+03	2.667451e+03	1.550080e+03	1.391603e+03	1.097484e+03	8.101367e+02	1.386041e+03	9.195376e+02	1.098692e+03	1.291310e+03	1.470464e+03	7.807101e+02	1.227564e+03	1.439897e+03	9.159754e+02
6.270000e+02	9.863541e+03	5.128745e+03	2.288568e+03	2.449801e+03	2.675126e+03	1.617206e+03	1.392232e+03	1.131609e+03	8.364146e+02	1.452154e+03	9.408030e+02	1.156958e+03	1.292836e+03	1.508992e+03	7.774713e+02	1.227180e+03	1.447954e+03	9.093524e+02
6.280000e+02	9.847069e+03	5.066914e+03	2.321691e+03	2.426289e+03	2.587482e+03	1.633938e+03	1.346258e+03	1.147655e+03	8.454971e+02	1.476194e+03	9.191561e+02	1.174034e+03	1.252248e+03	1.507127e+03	7.556555e+02	1.188515e+03	1.398975e+03	8.588838e+02
6.290000e+02	9.655284e+03	4.854213e+03	2.296483e+03	2.326488e+03	2.414328e+03	1.601119e+03	1.260975e+03	1.145538e+03	8.387710e+02	1.457713e+03	8.600670e+02	1.150944e+03	1.175536e+03	1.466415e+03	7.160975e+02	1.117570e+03	1.296764e+03	7.708842e+02
6.300000e+02	9.343265e+03	4.517403e+03	2.220185e+03	2.165151e+03	2.172802e+03	1.526482e+03	1.147848e+03	1.126936e+03	8.181266e+02	1.402059e+03	7.739899e+02	1.093248e+03	1.071895e+03	1.391155e+03	6.604776e+02	1.023427e+03	1.149380e+03	6.563182e+02
6.310000e+02	8.970242e+03	4.093373e+03	2.104462e+03	1.962156e+03	1.885079e+03	1.422674e+03	1.020218e+03	1.094665e+03	7.856283e+02	1.318834e+03	6.741201e+02	1.009795e+03	9.523533e+02	1.288031e+03	5.915998e+02	9.163802e+02	9.687025e+02	5.283346e+02
6.320000e+02	8.584859e+03	3.624405e+03	1.963411e+03	1.739657e+03	1.576167e+03	1.304779e+03	8.909849e+02	1.052203e+03	7.434678e+02	1.219944e+03	5.740025e+02	9.112068e+02	8.284437e+02	1.165650e+03	5.133830e+02	8.061518e+02	7.700175e+02	3.997858e+02
6.330000e+02	8.215835e+03	3.153328e+03	1.811647e+03	1.519148e+03	1.271496e+03	1.187823e+03	7.706400e+02	1.003351e+03	6.940175e+02	1.117630e+03	4.854352e+02	8.082950e+02	7.108476e+02	1.033710e+03	4.303872e+02	7.004492e+02	5.710477e+02	2.812362e+02
6.340000e+02	7.870653e+03	2.718487e+03	1.662571e+03	1.318642e+03	9.940577e+02	1.084584e+03	6.659234e+02	9.519487e+02	6.398521e+02	1.022720e+03	4.169093e+02	7.106208e+02	6.080173e+02	9.017313e+02	3.470187e+02	6.040602e+02	3.899979e+02	1.797277e+02
6.350000e+02	7.541839e+03	2.348981e+03	1.526945e+03	1.150372e+03	7.613484e+02	1.003925e+03	5.793180e+02	9.015574e+02	5.837137e+02	9.432317e+02	3.726971e+02	6.253858e+02	5.249836e+02	7.776748e+02	2.667795e+02	5.186255e+02	2.427228e+02	9.836817e+01
6.360000e+02	7.217619e+03	2.061138e+03	1.411910e+03	1.019557e+03	5.829017e+02	9.497994e+02	5.094513e+02	8.550743e+02	5.284428e+02	8.834676e+02	3.526449e+02	5.568340e+02	4.627220e+02	6.669134e+02	1.919118e+02	4.431204e+02	1.397809e+02	3.667861e+01
6.370000e+02	6.892274e+03	1.857246e+03	1.320532e+03	9.246105e+02	4.593507e+02	9.210357e+02	4.522688e+02	8.143143e+02	4.768645e+02	8.436677e+02	3.526731e+02	5.062157e+02	4.183946e+02	5.719395e+02	1.235642e+02	3.749015e+02	8.444886e+01	-8.464942e+00
6.380000e+02	6.572065e+03	1.727005e+03	1.251870e+03	8.587052e+02	3.835118e+02	9.119216e+02	4.026170e+02	7.796476e+02	4.315757e+02	8.202948e+02	3.658860e+02	4.722206e+02	3.864852e+02	4.928219e+02	6.233067e+01	3.109906e+02	7.252100e+01	-4.153385e+01
6.390000e+02	6.274855e+03	1.651322e+03	1.201546e+03	8.121691e+02	3.432099e+02	9.135117e+02	3.557554e+02	7.498551e+02	3.946040e+02	8.069421e+02	3.840788e+02	4.516886e+02	3.604817e+02	4.280934e+02	8.848444e+00	2.491860e+02	9.402422e+01	-6.698688e+01
6.400000e+02	6.024346e+03	1.607387e+03	1.162797e+03	7.749617e+02	3.248864e+02	9.154936e+02	3.083760e+02	7.223781e+02	3.670099e+02	7.957872e+02	3.993458e+02	4.404165e+02	3.345466e+02	3.756190e+02	-3.584434e+01	1.886698e+02	1.362176e+02	-8.815071e+01
6.410000e+02	5.841970e+03	1.573710e+03	1.127978e+03	7.386096e+02	3.167930e+02	9.083244e+02	2.589327e+02	6.940354e+02	3.485946e+02	7.793836e+02	4.054782e+02	4.339402e+02	3.046708e+02	3.331343e+02	-7.033764e+01	1.299918e+02	1.868031e+02	-1.065896e+02
6.420000e+02	5.739927e+03	1.533999e+03	1.090308e+03	6.973132e+02	3.108835e+02	8.852283e+02	2.073629e+02	6.620741e+02	3.378879e+02	7.524196e+02	3.989034e+02	4.282307e+02	2.690834e+02	2.984121e+02	-9.322258e+01	7.455390e+01	2.363325e+02	-1.220891e+02
6.430000e+02	5.717770e+03	1.479195e+03	1.045446e+03	6.482656e+02	3.031480e+02	8.435647e+02	1.544943e+02	6.251914e+02	3.324821e+02	7.129637e+02	3.790134e+02	4.202516e+02	2.280145e+02	2.692540e+02	-1.036321e+02	2.389291e+01	2.792591e+02	-1.332029e+02
6.440000e+02	5.763007e+03	1.407533e+03	9.923916e+02	5.914132e+02	2.927559e+02	7.851452e+02	1.014790e+02	5.840861e+02	3.296296e+02	6.627622e+02	3.478583e+02	4.083031e+02	1.831101e+02	2.435561e+02	-1.017297e+02	-2.090446e+01	3.136656e+02	-1.381369e+02
6.450000e+02	5.854597e+03	1.322956e+03	9.333347e+02	5.288927e+02	2.806996e+02	7.153418e+02	4.948983e+01	5.412405e+02	3.269102e+02	6.064249e+02	3.093109e+02	3.920920e+02	1.368002e+02	2.195824e+02	-8.896840e+01	-5.942750e+01	3.401336e+02	-1.356381e+02
6.460000e+02	5.967580e+03	1.232564e+03	8.724954e+02	4.643038e+02	2.685699e+02	6.412340e+02	-2.897453e-01	4.999661e+02	3.227531e+02	5.497429e+02	2.679337e+02	3.725275e+02	9.177538e+01	1.963702e+02	-6.803174e+01	-9.178115e+01	3.603588e+02	-1.255834e+02
6.470000e+02	6.077435e+03	1.143884e+03	8.144238e+02	4.019014e+02	2.577772e+02	5.694275e+02	-4.653830e+01	4.630896e+02	3.166706e+02	4.977538e+02	2.278649e+02	3.513327e+02	5.056765e+01	1.740365e+02	-4.247473e+01	-1.182122e+02	3.759983e+02	-1.091123e+02
6.480000e+02	6.163504e+03	1.062682e+03	7.624528e+02	3.457772e+02	2.491810e+02	5.043259e+02	-8.775958e+01	4.318348e+02	3.091643e+02	4.532891e+02	1.920324e+02	3.306169e+02	1.515939e+01	1.537448e+02	-1.616999e+01	-1.387966e+02	3.879874e+02	-8.835345e+01
6.490000e+02	6.211316e+03	9.917402e+02	7.178879e+02	2.991192e+02	2.429202e+02	4.474493e+02	-1.224868e+02	4.053676e+02	3.013583e+02	4.165301e+02	1.618834e+02	3.125195e+02	-1.340075e+01	1.372359e+02	7.293152e+00	-1.534061e+02	3.963369e+02	-6.594238e+01
6.500000e+02	6.213720e+03	9.307049e+02	6.801182e+02	2.636575e+02	2.382833e+02	3.979301e+02	-1.497003e+02	3.811765e+02	2.944781e+02	3.856404e+02	1.376094e+02	2.989412e+02	-3.528344e+01	1.260488e+02	2.511619e+01	-1.619899e+02	4.002843e+02	-4.454393e+01
6.510000e+02	6.170593e+03	8.767797e+02	6.473930e+02	2.393894e+02	2.336392e+02	3.538045e+02	-1.692611e+02	3.560991e+02	2.893219e+02	3.580712e+02	1.186515e+02	2.912936e+02	-5.190295e+01	1.207392e+02	3.561359e+01	-1.649942e+02	3.986447e+02	-2.650350e+01
6.520000e+02	6.087049e+03	8.258987e+02	6.177604e+02	2.246394e+02	2.265879e+02	3.134170e+02	-1.820994e+02	3.275598e+02	2.858794e+02	3.318808e+02	1.041954e+02	2.902003e+02	-6.555885e+01	1.204459e+02	3.831916e+01	-1.636355e+02	3.902346e+02	-1.362193e+01
6.530000e+02	5.970612e+03	7.740252e+02	5.897324e+02	2.164697e+02	2.144740e+02	2.763073e+02	-1.899940e+02	2.945379e+02	2.832296e+02	3.065024e+02	9.344505e+01	2.951942e+02	-7.872164e+01	1.230270e+02	3.389705e+01	-1.597987e+02	3.742835e+02	-6.980087e+00
6.540000e+02	5.828360e+03	7.183519e+02	5.625343e+02	2.114209e+02	1.952484e+02	2.433024e+02	-1.949638e+02	2.579447e+02	2.797870e+02	2.827466e+02	8.565859e+01	3.045893e+02	-9.316499e+01	1.257650e+02	2.390758e+01	-1.555193e+02	3.507780e+02	-6.754924e+00
6.550000e+02	5.665264e+03	6.582953e+02	5.360913e+02	2.064886e+02	1.684542e+02	2.159668e+02	-1.984920e+02	2.203474e+02	2.738606e+02	2.622300e+02	8.009462e+01	3.157435e+02	-1.092512e+02	1.263967e+02	1.048972e+01	-1.522285e+02	3.206924e+02	-1.204295e+01
6.560000e+02	5.484401e+03	5.961774e+02	5.110031e+02	2.001365e+02	1.359825e+02	1.958204e+02	-2.008972e+02	1.852151e+02	2.643614e+02	2.466413e+02	7.605012e+01	3.257877e+02	-1.256475e+02	1.240891e+02	-3.980048e+00	-1.500761e+02	2.860676e+02	-2.078118e+01
6.570000e+02	5.288838e+03	5.373804e+02	4.885944e+02	1.930199e+02	1.022518e+02	1.837195e+02	-2.011253e+02	1.559724e+02	2.513968e+02	2.371973e+02	7.304928e+01	3.326216e+02	-1.395984e+02	1.199730e+02	-1.720762e+01	-1.476473e+02	2.499072e+02	-2.988560e+01
6.580000e+02	5.084132e+03	4.896719e+02	4.708739e+02	1.880602e+02	7.361000e+01	1.795711e+02	-1.970734e+02	1.351353e+02	2.364797e+02	2.343943e+02	7.106694e+01	3.357383e+02	-1.476754e+02	1.169953e+02	-2.725932e+01	-1.422500e+02	2.158672e+02	-3.569402e+01
6.590000e+02	4.880166e+03	4.615255e+02	4.601209e+02	1.896615e+02	5.700661e+01	1.823189e+02	-1.863470e+02	1.237027e+02	2.221903e+02	2.379311e+02	7.058072e+01	3.364180e+02	-1.467542e+02	1.190826e+02	-3.279833e+01	-1.307347e+02	1.877474e+02	-3.470849e+01
6.600000e+02	4.691445e+03	4.596569e+02	4.579856e+02	2.021935e+02	5.825101e+01	1.900538e+02	-1.671778e+02	1.208858e+02	2.113443e+02	2.466421e+02	7.232391e+01	3.370997e+02	-1.349043e+02	1.298714e+02	-3.327710e+01	-1.105892e+02	1.688452e+02	-2.450396e+01
6.610000e+02	4.535805e+03	4.865250e+02	4.643730e+02	2.282496e+02	8.038610e+01	2.001846e+02	-1.391646e+02	1.242024e+02	2.059486e+02	2.584255e+02	7.680919e+01	3.401707e+02	-1.119193e+02	1.514424e+02	-2.905257e+01	-8.092347e+01	1.613133e+02	-4.549730e+00
6.620000e+02	4.432132e+03	5.388456e+02	4.766882e+02	2.673982e+02	1.227505e+02	2.097309e+02	-1.035742e+02	1.299342e+02	2.063607e+02	2.703288e+02	8.387237e+01	3.467543e+02	-7.935389e+01	1.835284e+02	-2.135509e+01	-4.297615e+01	1.657292e+02	2.335740e+01
6.630000e+02	4.397905e+03	6.079617e+02	4.900052e+02	3.160074e+02	1.811136e+02	2.158239e+02	-6.310910e+01	1.338985e+02	2.110226e+02	2.789840e+02	9.250919e+01	3.561071e+02	-4.009700e+01	2.235016e+02	-1.204287e+01	5.095834e-02	1.810640e+02	5.527469e+01
6.640000e+02	4.446997e+03	6.821597e+02	4.983103e+02	3.682563e+02	2.488720e+02	2.163742e+02	-2.125849e+01	1.323937e+02	2.169138e+02	2.813978e+02	1.011188e+02	3.659170e+02	2.342845e+00	2.671419e+02	-3.140499e+00	4.376500e+01	2.051073e+02	8.593834e+01
6.650000e+02	4.587610e+03	7.500776e+02	4.963886e+02	4.178806e+02	3.188416e+02	2.106774e+02	1.850430e+01	1.230848e+02	2.205602e+02	2.758295e+02	1.080266e+02	3.733043e+02	4.458081e+01	3.098594e+02	3.727822e+00	8.365610e+01	2.351848e+02	1.100142e+02
6.660000e+02	4.819939e+03	8.037288e+02	4.815203e+02	4.598327e+02	3.848992e+02	1.996432e+02	5.337944e+01	1.055578e+02	2.191891e+02	2.623323e+02	1.119934e+02	3.759632e+02	8.387509e+01	3.478456e+02	7.807448e+00	1.160680e+02	2.688296e+02	1.233771e+02
6.670000e+02	5.133510e+03	8.397922e+02	4.541993e+02	4.911067e+02	4.427945e+02	1.854392e+02	8.154180e+01	8.135535e+01	2.115621e+02	2.426382e+02	1.124362e+02	3.728448e+02	1.182686e+02	3.786779e+02	9.381302e+00	1.387401e+02	3.040519e+02	1.240026e+02
6.680000e+02	5.504939e+03	8.586690e+02	4.175645e+02	5.104465e+02	4.898802e+02	1.706159e+02	1.020452e+02	5.347947e+01	1.981772e+02	2.193881e+02	1.092702e+02	3.640860e+02	1.463683e+02	4.011845e+02	9.546050e+00	1.508165e+02	3.390604e+02	1.122132e+02
6.690000e+02	5.897634e+03	8.619721e+02	3.758799e+02	5.172806e+02	5.240926e+02	1.570537e+02	1.144675e+02	2.554378e+01	1.808308e+02	1.950499e+02	1.025180e+02	3.503373e+02	1.669522e+02	4.147718e+02	9.682275e+00	1.524626e+02	3.716257e+02	9.027724e+01
6.700000e+02	6.264912e+03	8.499329e+02	3.328410e+02	5.106544e+02	5.429336e+02	1.451918e+02	1.185431e+02	8.703606e-01	1.618132e+02	1.710286e+02	9.196509e+01	3.319720e+02	1.786924e+02	4.186992e+02	1.084804e+01	1.443787e+02	3.985499e+02	6.158529e+01
6.710000e+02	6.556984e+03	8.202267e+02	2.904949e+02	4.889063e+02	5.432039e+02	1.338890e+02	1.140105e+02	-1.819004e+01	1.431398e+02	1.473559e+02	7.710815e+01	3.086864e+02	1.802308e+02	4.118087e+02	1.335526e+01	1.274760e+02	4.157225e+02	2.973585e+01
6.720000e+02	6.730573e+03	7.689083e+02	2.491779e+02	4.503851e+02	5.217920e+02	1.209821e+02	1.007713e+02	-3.056372e+01	1.261402e+02	1.230387e+02	5.746309e+01	2.797432e+02	1.706536e+02	3.929330e+02	1.669149e+01	1.028262e+02	4.189603e+02	-2.192803e+00
6.730000e+02	6.758475e+03	6.929613e+02	2.083216e+02	3.948623e+02	4.771766e+02	1.043011e+02	7.926479e+01	-3.639441e+01	1.114889e+02	9.683372e+01	3.308817e+01	2.447176e+02	1.501569e+02	3.617854e+02	1.978628e+01	7.179560e+01	4.053763e+02	-3.204994e+01
6.740000e+02	6.636028e+03	5.930806e+02	1.675847e+02	3.248540e+02	4.108440e+02	8.271534e+01	5.082835e+01	-3.673730e+01	9.952522e+01	6.806054e+01	5.047544e+00	2.043235e+02	1.205430e+02	3.198178e+02	2.148134e+01	3.617170e+01	3.746689e+02	-5.871123e+01
6.750000e+02	6.382425e+03	4.751999e+02	1.277041e+02	2.460586e+02	3.278185e+02	5.680022e+01	1.780532e+01	-3.314987e+01	9.058308e+01	3.712215e+01	-2.444158e+01	1.608554e+02	8.521569e+01	2.705113e+02	2.100989e+01	-1.874578e+00	3.296918e+02	-8.195439e+01
6.760000e+02	6.036629e+03	3.499911e+02	9.071639e+01	1.665653e+02	2.359773e+02	2.889885e+01	-1.670755e+01	-2.728060e+01	8.511408e+01	5.603451e+00	-5.228796e+01	1.179984e+02	4.857919e+01	2.188640e+02	1.832533e+01	-4.000466e+01	2.759832e+02	-1.021887e+02
6.770000e+02	5.649324e+03	2.306343e+02	5.958377e+01	9.511605e+01	1.444571e+02	2.610142e+00	-4.938924e+01	-2.050223e+01	8.356280e+01	-2.397797e+01	-7.514245e+01	8.008727e+01	1.504053e+01	1.702686e+02	1.419711e+01	-7.597885e+01	2.204402e+02	-1.200739e+02
6.780000e+02	5.273205e+03	1.299659e+02	3.753953e+01	3.916439e+01	6.188481e+01	-1.805652e+01	-7.727790e+01	-1.361478e+01	8.612992e+01	-4.858948e+01	-9.011296e+01	5.115546e+01	-1.197990e+01	1.292867e+02	1.006158e+01	-1.078120e+02	1.697042e+02	-1.360530e+02
6.790000e+02	4.953714e+03	5.821348e+01	2.750064e+01	3.511219e+00	-4.871552e+00	-2.954522e+01	-9.817891e+01	-6.658728e+00	9.261914e+01	-6.511781e+01	-9.531165e+01	3.416040e+01	-3.063863e+01	9.883152e+01	7.659917e+00	-1.337523e+02	1.288910e+02	-1.498776e+02
6.800000e+02	4.721674e+03	2.194688e+01	3.170826e+01	-1.007958e+01	-5.115557e+01	-2.939185e+01	-1.107897e+02	1.097168e+00	1.024802e+02	-7.077146e+01	-9.006994e+01	3.061202e+01	-4.068166e+01	7.999833e+01	8.528618e+00	-1.521697e+02	1.010272e+02	-1.602804e+02
6.810000e+02	4.588586e+03	2.405258e+01	5.150899e+01	-2.427660e+00	-7.441208e+01	-1.655119e+01	-1.146004e+02	1.094019e+01	1.149992e+02	-6.349007e+01	-7.483408e+01	4.056964e+01	-4.298791e+01	7.241378e+01	1.345295e+01	-1.615393e+02	8.714264e+01	-1.649872e+02
6.820000e+02	4.545106e+03	6.401151e+01	8.706602e+01	2.382590e+01	-7.399870e+01	8.523101e+00	-1.097393e+02	2.427800e+01	1.294686e+02	-4.240268e+01	-5.090733e+01	6.278880e+01	-3.895402e+01	7.474004e+01	2.204310e+01	-1.606649e+02	8.668359e+01	-1.611902e+02
6.830000e+02	4.563143e+03	1.378422e+02	1.368844e+02	6.474553e+01	-5.127490e+01	4.392087e+01	-9.692137e+01	4.208323e+01	1.451766e+02	-8.292474e+00	-2.024686e+01	9.480190e+01	-3.004802e+01	8.499865e+01	3.260798e+01	-1.491342e+02	9.787828e+01	-1.464283e+02
6.840000e+02	4.601774e+03	2.376423e+02	1.972841e+02	1.151812e+02	-9.941658e+00	8.636652e+01	-7.754133e+01	6.439322e+01	1.611973e+02	3.608650e+01	1.457169e+01	1.328917e+02	-1.770269e+01	1.006152e+02	4.244045e+01	-1.278208e+02	1.178990e+02	-1.196187e+02
6.850000e+02	4.616464e+03	3.512951e+02	2.621818e+02	1.686352e+02	4.374535e+01	1.313950e+02	-5.381247e+01	9.004992e+01	1.761346e+02	8.604687e+01	5.028350e+01	1.721327e+02	-3.490508e+00	1.183566e+02	4.848794e+01	-9.916002e+01	1.429256e+02	-8.185824e+01
6.860000e+02	4.569935e+03	4.631519e+02	3.235612e+02	2.174108e+02	1.013468e+02	1.737259e+02	-2.876679e+01	1.167939e+02	1.880595e+02	1.355014e+02	8.295948e+01	2.067682e+02	1.064859e+01	1.344553e+02	4.821755e+01	-6.699071e+01	1.683575e+02	-3.664300e+01
6.870000e+02	4.442014e+03	5.561624e+02	3.727691e+02	2.534479e+02	1.534176e+02	2.079206e+02	-5.965336e+00	1.416995e+02	1.948055e+02	1.779633e+02	1.083351e+02	2.310706e+02	2.238197e+01	1.451155e+02	4.038069e+01	-3.592205e+01	1.893587e+02	1.065501e+01
6.880000e+02	4.235422e+03	6.151920e+02	4.023734e+02	2.698540e+02	1.913097e+02	2.292781e+02	1.110389e+01	1.618123e+02	1.945870e+02	2.077862e+02	1.225064e+02	2.405620e+02	2.929516e+01	1.473490e+02	2.540261e+01	-1.038742e+01	2.017148e+02	5.394008e+01
6.890000e+02	3.975371e+03	6.305540e+02	4.079905e+02	2.626823e+02	2.090763e+02	2.347671e+02	1.979973e+01	1.747841e+02	1.866951e+02	2.212954e+02	1.228377e+02	2.332074e+02	2.947649e+01	1.398445e+02	5.263629e+00	6.328614e+00	2.027637e+02	8.781919e+01
6.900000e+02	3.702617e+03	6.005080e+02	3.894231e+02	2.322533e+02	2.048424e+02	2.237111e+02	1.902152e+01	1.793193e+02	1.719409e+02	2.174822e+02	1.087658e+02	2.101049e+02	2.214842e+01	1.234859e+02	-1.706702e+01	1.279326e+01	1.920633e+02	1.088420e+02
6.910000e+02	3.461882e+03	5.317798e+02	3.506908e+02	1.834216e+02	1.811705e+02	1.979924e+02	9.566847e+00	1.753392e+02	1.526054e+02	1.980853e+02	8.217629e+01	1.753526e+02	8.067585e+00	1.012423e+02	-3.843002e+01	9.660595e+00	1.715222e+02	1.161685e+02
6.920000e+02	3.289194e+03	4.378764e+02	2.989611e+02	1.245854e+02	1.442955e+02	1.616989e+02	-5.994367e+00	1.638763e+02	1.318726e+02	1.670883e+02	4.717475e+01	1.350857e+02	-1.050296e+01	7.740640e+01	-5.624208e+01	-6.040269e-01	1.449100e+02	1.114966e+02
6.930000e+02	3.202115e+03	3.357535e+02	2.427749e+02	6.571790e+01	1.024747e+02	1.203210e+02	-2.390853e+01	1.467840e+02	1.129502e+02	1.298242e+02	9.299987e+00	9.599164e+01	-3.027727e+01	5.641276e+01	-6.901888e+01	-1.440422e+01	1.168880e+02	9.834708e+01
6.940000e+02	3.195849e+03	2.418961e+02	1.901483e+02	1.604871e+01	6.395893e+01	7.972836e+01	-4.011107e+01	1.263658e+02	9.820281e+01	9.194480e+01	-2.558507e+01	6.378321e+01	-4.773852e+01	4.162812e+01	-7.655656e+01	-2.789341e+01	9.186022e+01	8.100405e+01
6.950000e+02	3.246232e+03	1.689428e+02	1.470775e+02	-1.790417e+01	3.515678e+01	4.518441e+01	-5.112074e+01	1.050030e+02	8.859691e+01	5.847970e+01	-5.240870e+01	4.207522e+01	-5.998355e+01	3.449874e+01	-7.978468e+01	-3.782413e+01	7.298790e+01	6.347453e+01
6.960000e+02	3.318351e+03	1.236698e+02	1.167537e+02	-3.342653e+01	1.945105e+01	2.060017e+01	-5.470751e+01	8.482708e+01	8.361503e+01	3.313761e+01	-6.773053e+01	3.192738e+01	-6.535786e+01	3.429846e+01	-8.037475e+01	-4.216869e+01	6.162607e+01	4.875222e+01
6.970000e+02	3.377846e+03	1.066398e+02	9.953909e+01	-3.162804e+01	1.688776e+01	8.133139e+00	-5.018233e+01	6.746454e+01	8.161628e+01	1.792158e+01	-7.014004e+01	3.207529e+01	-6.370681e+01	3.850702e+01	-8.021903e+01	-4.039254e+01	5.728609e+01	3.850942e+01
6.980000e+02	3.401201e+03	1.133042e+02	9.354553e+01	-1.653800e+01	2.468928e+01	8.137789e+00	-3.829235e+01	5.387748e+01	8.047529e+01	1.306897e+01	-6.018971e+01	3.966885e+01	-5.620971e+01	4.364748e+01	-8.089965e+01	-3.335994e+01	5.805446e+01	3.317194e+01
6.990000e+02	3.381919e+03	1.359925e+02	9.554315e+01	6.326981e+00	3.833088e+01	1.939563e+01	-2.082541e+01	4.431829e+01	7.826494e+01	1.727699e+01	-3.996560e+01	5.122573e+01	-4.490093e+01	4.628917e+01	-8.326342e+01	-2.294300e+01	6.127846e+01	3.222517e+01
7.000000e+02	3.330977e+03	1.661049e+02	1.019054e+02	3.143988e+01	5.282354e+01	3.951090e+01	-8.903703e-02	3.840361e+01	7.377000e+01	2.813430e+01	-1.247667e+01	6.350275e+01	-3.206443e+01	4.391389e+01	-8.720096e+01	-1.146486e+01	6.429214e+01	3.458233e+01
7.010000e+02	3.271906e+03	1.959497e+02	1.093668e+02	5.438837e+01	6.388026e+01	6.535999e+01	2.158413e+01	3.529199e+01	6.670963e+01	4.265626e+01	1.894714e+01	7.407587e+01	-1.968858e+01	3.543917e+01	-9.168997e+01	-1.119134e+00	6.500207e+01	3.890376e+01
7.020000e+02	3.232525e+03	2.199572e+02	1.154940e+02	7.246160e+01	6.876724e+01	9.352285e+01	4.222080e+01	3.393395e+01	5.766778e+01	5.782557e+01	5.111633e+01	8.156123e+01	-9.100394e+00	2.134361e+01	-9.509695e+01	6.523686e+00	6.224500e+01	4.384345e+01
7.030000e+02	3.236214e+03	2.352797e+02	1.188970e+02	8.473827e+01	6.677362e+01	1.206759e+02	6.046895e+01	3.335234e+01	4.783113e+01	7.106546e+01	8.126681e+01	8.554595e+01	-8.082406e-01	3.470020e+00	-9.565582e+01	1.085840e+01	5.591539e+01	4.825878e+01
7.040000e+02	3.295422e+03	2.419209e+02	1.192704e+02	9.184671e+01	5.929913e+01	1.439514e+02	7.575145e+01	3.290216e+01	3.867131e+01	8.059880e+01	1.072108e+02	8.636950e+01	5.476800e+00	-1.536543e+01	-9.198494e+01	1.239857e+01	4.689956e+01	5.141353e+01
7.050000e+02	3.409028e+03	2.424641e+02	1.173256e+02	9.555351e+01	4.954399e+01	1.612487e+02	8.829636e+01	3.244872e+01	3.167174e+01	8.565370e+01	1.274154e+02	8.487813e+01	1.067513e+01	-3.186315e+01	-8.349513e+01	1.270088e+01	3.684119e+01	5.313968e+01
7.060000e+02	3.563817e+03	2.413194e+02	1.145934e+02	9.823255e+01	4.175557e+01	1.714394e+02	9.898584e+01	3.239994e+01	2.812399e+01	8.646938e+01	1.410307e+02	8.219470e+01	1.603786e+01	-4.279913e+01	-7.058489e+01	1.401538e+01	2.773773e+01	5.385512e+01
7.070000e+02	3.739053e+03	2.433841e+02	1.130255e+02	1.021949e+02	4.003900e+01	1.743831e+02	1.089756e+02	3.355067e+01	2.896019e+01	8.406522e+01	1.478390e+02	7.947588e+01	2.271949e+01	-4.564468e+01	-5.459429e+01	1.865730e+01	2.137913e+01	5.433425e+01
7.080000e+02	3.912449e+03	2.522368e+02	1.143841e+02	1.089201e+02	4.692206e+01	1.707200e+02	1.191329e+02	3.675326e+01	3.459129e+01	7.979274e+01	1.480984e+02	7.763178e+01	3.128923e+01	-3.917847e+01	-3.755824e+01	2.820536e+01	1.871440e+01	5.523224e+01
7.090000e+02	4.065785e+03	2.683945e+02	1.195679e+02	1.184007e+02	6.210633e+01	1.615062e+02	1.294854e+02	4.250570e+01	4.477681e+01	7.479096e+01	1.423195e+02	7.706295e+01	4.133923e+01	-2.391827e+01	-2.183254e+01	4.277015e+01	1.933440e+01	5.652980e+01
7.100000e+02	4.188818e+03	2.884525e+02	1.281680e+02	1.289566e+02	8.197057e+01	1.478661e+02	1.389590e+02	5.061103e+01	5.860901e+01	6.955880e+01	1.311022e+02	7.755751e+01	5.140093e+01	-2.144500e+00	-9.661569e+00	6.065185e+01	2.131752e+01	5.718765e+01
7.110000e+02	4.280799e+03	3.058122e+02	1.385571e+02	1.378079e+02	1.002560e+02	1.308576e+02	1.456222e+02	6.006661e+01	7.469063e+01	6.386624e+01	1.151766e+02	7.849082e+01	5.931921e+01	2.263300e+01	-2.739744e+00	7.863130e+01	2.162393e+01	5.527258e+01
7.120000e+02	4.349531e+03	3.130757e+02	1.486073e+02	1.423789e+02	1.099305e+02	1.116331e+02	1.474290e+02	6.926988e+01	9.150370e+01	5.710341e+01	9.568374e+01	7.933761e+01	6.304327e+01	4.669702e+01	-1.822149e+00	9.290003e+01	1.702979e+01	4.861471e+01
7.130000e+02	4.408395e+03	3.053126e+02	1.567953e+02	1.418528e+02	1.056664e+02	9.178788e+01	1.431708e+02	7.649832e+01	1.078501e+02	4.894505e+01	7.454664e+01	8.029694e+01	6.155750e+01	6.730807e+01	-6.467704e+00	1.003290e+02	5.336376e+00	3.576978e+01
7.140000e+02	4.472117e+03	2.827687e+02	1.631735e+02	1.382136e+02	8.597196e+01	7.361755e+01	1.331834e+02	8.049175e+01	1.231715e+02	4.000180e+01	5.463471e+01	8.268152e+01	5.553303e+01	8.358049e+01	-1.502202e+01	9.956877e+01	-1.359859e+01	1.685446e+01
7.150000e+02	4.552292e+03	2.516399e+02	1.696635e+02	1.361060e+02	5.404743e+01	5.999621e+01	1.194234e+02	8.090258e+01	1.375894e+02	3.207404e+01	3.945239e+01	8.876056e+01	4.734561e+01	9.665480e+01	-2.491952e+01	9.150247e+01	-3.745771e+01	-6.165376e+00
7.160000e+02	4.653722e+03	2.223424e+02	1.794165e+02	1.413702e+02	1.693663e+01	5.376731e+01	1.048310e+02	7.842330e+01	1.516320e+02	2.778445e+01	3.230791e+01	1.009927e+02	4.037681e+01	1.090630e+02	-3.328631e+01	7.884947e+01	-6.191632e+01	-2.991016e+01
7.170000e+02	4.772512e+03	2.059118e+02	1.954598e+02	1.587876e+02	-1.670567e+01	5.683153e+01	9.226544e+01	7.453673e+01	1.657794e+02	2.968049e+01	3.523564e+01	1.209225e+02	3.786358e+01	1.235522e+02	-3.769062e+01	6.511565e+01	-8.182529e+01	-5.057170e+01
7.180000e+02	4.896469e+03	2.100964e+02	2.192426e+02	1.900414e+02	-3.929951e+01	6.934363e+01	8.352959e+01	7.099631e+01	1.800450e+02	3.919780e+01	4.815987e+01	1.482457e+02	4.179349e+01	1.418813e+02	-3.679328e+01	5.338494e+01	-9.268838e+01	-6.501178e+01
7.190000e+02	5.007733e+03	2.368501e+02	2.497737e+02	2.328457e+02	-4.639552e+01	8.944459e+01	7.894955e+01	6.925215e+01	1.937923e+02	5.598176e+01	6.874666e+01	1.805210e+02	5.232202e+01	1.640985e+02	-3.066216e+01	4.548773e+01	-9.188654e+01	-7.150922e+01
7.200000e+02	5.086891e+03	2.822004e+02	2.837600e+02	2.816440e+02	-3.739122e+01	1.137243e+02	7.766472e+01	7.004055e+01	2.058566e+02	7.790377e+01	9.308926e+01	2.137190e+02	6.792208e+01	1.885539e+02	-2.064146e+01	4.184497e+01	-7.923829e+01	-6.990214e+01
7.210000e+02	5.117367e+03	3.382837e+02	3.166552e+02	3.295136e+02	-1.487305e+01	1.382511e+02	7.840279e+01	7.325890e+01	2.148929e+02	1.017627e+02	1.169654e+02	2.433959e+02	8.611458e+01	2.125471e+02	-8.845370e+00	4.191487e+01	-5.678840e+01	-6.119217e+01
7.220000e+02	5.088818e+03	3.963599e+02	3.441010e+02	3.703646e+02	1.684826e+01	1.597183e+02	8.027145e+01	7.811146e+01	2.197787e+02	1.243227e+02	1.371185e+02	2.659892e+02	1.043722e+02	2.332448e+02	2.512681e+00	4.487595e+01	-2.802634e+01	-4.692303e+01
7.230000e+02	4.998669e+03	4.493278e+02	3.630980e+02	4.004610e+02	5.320185e+01	1.762021e+02	8.312873e+01	8.340568e+01	2.199079e+02	1.431906e+02	1.520062e+02	2.796920e+02	1.207657e+02	2.484531e+02	1.170599e+01	5.011693e+01	3.088126e+00	-2.869374e+01
7.240000e+02	4.851610e+03	4.927283e+02	3.724355e+02	4.187060e+02	9.019734e+01	1.872288e+02	8.735677e+01	8.784816e+01	2.152854e+02	1.571507e+02	1.617310e+02	2.845871e+02	1.341157e+02	2.569731e+02	1.781139e+01	5.727790e+01	3.292436e+01	-8.019320e+00
7.250000e+02	4.657644e+03	5.240951e+02	3.723013e+02	4.257657e+02	1.244546e+02	1.931957e+02	9.319618e+01	9.023340e+01	2.064279e+02	1.658741e+02	1.672642e+02	2.820676e+02	1.436950e+02	2.584993e+02	2.069363e+01	6.587339e+01	5.858752e+01	1.348039e+01
7.260000e+02	4.429694e+03	5.413065e+02	3.633700e+02	4.226051e+02	1.526639e+02	1.944923e+02	1.000145e+02	8.950206e+01	1.941339e+02	1.692370e+02	1.693904e+02	2.738677e+02	1.487343e+02	2.532120e+02	2.071042e+01	7.475769e+01	7.791361e+01	3.376321e+01
7.270000e+02	4.181786e+03	5.409528e+02	3.458619e+02	4.091755e+02	1.709471e+02	1.907800e+02	1.058878e+02	8.472070e+01	1.792103e+02	1.666527e+02	1.678810e+02	2.611410e+02	1.480316e+02	2.412916e+02	1.826779e+01	8.175879e+01	8.919643e+01	5.016310e+01
7.280000e+02	3.928378e+03	5.175933e+02	3.190198e+02	3.838152e+02	1.745686e+02	1.807721e+02	1.076994e+02	7.506955e+01	1.622385e+02	1.567825e+02	1.612477e+02	2.439501e+02	1.398626e+02	2.225647e+02	1.338699e+01	8.370799e+01	9.086901e+01	5.946772e+01
7.290000e+02	3.684708e+03	4.643110e+02	2.812312e+02	3.435524e+02	1.582518e+02	1.625965e+02	1.017268e+02	5.990966e+01	1.434502e+02	1.377824e+02	1.471361e+02	2.213214e+02	1.222288e+02	1.964136e+02	5.440299e+00	7.691082e+01	8.134937e+01	5.830152e+01
7.300000e+02	3.467362e+03	3.744435e+02	2.307498e+02	2.851477e+02	1.171097e+02	1.345615e+02	8.451459e+01	3.895068e+01	1.227615e+02	1.079897e+02	1.231544e+02	1.917990e+02	9.334695e+01	1.619908e+02	-6.823034e+00	5.794106e+01	5.917675e+01	4.373086e+01
7.310000e+02	3.294011e+03	2.439937e+02	1.667571e+02	2.065119e+02	4.799675e+01	9.601010e+01	5.378865e+01	1.248533e+01	9.997767e+01	6.678085e+01	8.781546e+01	1.542717e+02	5.223916e+01	1.186946e+02	-2.491206e+01	2.455787e+01	2.344655e+01	1.396565e+01
7.320000e+02	3.181523e+03	7.409024e+01	9.042528e+01	1.081133e+02	-4.902097e+01	4.797838e+01	9.225246e+00	-1.837998e+01	7.512514e+01	1.530147e+01	4.131424e+01	1.088052e+02	-6.921891e-01	6.679784e+01	-4.995334e+01	-2.345292e+01	-2.556095e+01	-3.095766e+01
7.330000e+02	3.142556e+03	-1.270974e+02	5.672617e+00	-5.934055e+00	-1.694239e+02	-6.502001e+00	-4.702493e+01	-5.157741e+01	4.882197e+01	-4.314821e+01	-1.400847e+01	5.724995e+01	-6.318349e+01	8.073940e+00	-8.196300e+01	-8.367209e+01	-8.574530e+01	-8.861331e+01
7.340000e+02	3.181704e+03	-3.435022e+02	-8.061052e+01	-1.273347e+02	-3.035850e+02	-6.248267e+01	-1.101186e+02	-8.408263e+01	2.255991e+01	-1.031696e+02	-7.356315e+01	3.471955e+00	-1.308053e+02	-5.377121e+01	-1.193106e+02	-1.508062e+02	-1.527730e+02	-1.538715e+02
7.350000e+02	3.292901e+03	-5.518242e+02	-1.590093e+02	-2.438570e+02	-4.370631e+02	-1.135366e+02	-1.726996e+02	-1.121271e+02	-1.229322e+00	-1.577794e+02	-1.307965e+02	-4.688253e+01	-1.969725e+02	-1.130594e+02	-1.586466e+02	-2.169429e+02	-2.201151e+02	-2.190145e+02
7.360000e+02	3.459563e+03	-7.240932e+02	-2.187777e+02	-3.405863e+02	-5.521311e+02	-1.525461e+02	-2.256126e+02	-1.316500e+02	-1.942047e+01	-1.993569e+02	-1.779228e+02	-8.712809e+01	-2.534557e+02	-1.626618e+02	-1.954269e+02	-2.724238e+02	-2.797029e+02	-2.744851e+02
7.370000e+02	3.657852e+03	-8.322000e+02	-2.497223e+02	-4.022858e+02	-6.305979e+02	-1.728318e+02	-2.592482e+02	-1.389754e+02	-2.877451e+01	-2.209477e+02	-2.071438e+02	-1.107475e+02	-2.915355e+02	-1.951398e+02	-2.249360e+02	-3.073645e+02	-3.232296e+02	-3.103648e+02
7.380000e+02	3.862060e+03	-8.538230e+02	-2.444963e+02	-4.166171e+02	-6.575492e+02	-1.695208e+02	-2.654309e+02	-1.316157e+02	-2.675685e+01	-2.177396e+02	-2.122548e+02	-1.128813e+02	-3.037329e+02	-2.043597e+02	-2.434746e+02	-3.136501e+02	-3.438958e+02	-3.184243e+02
7.390000e+02	4.050161e+03	-7.783514e+02	-2.007349e+02	-3.774817e+02	-6.251142e+02	-1.408692e+02	-2.394675e+02	-1.090032e+02	-1.237162e+01	-1.883636e+02	-1.902959e+02	-9.173251e+01	-2.857462e+02	-1.871828e+02	-2.492770e+02	-2.869625e+02	-3.381489e+02	-2.942575e+02
7.400000e+02	4.207501e+03	-6.108331e+02	-1.222916e+02	-2.873647e+02	-5.350222e+02	-8.910139e+01	-1.817260e+02	-7.289259e+01	1.328730e+01	-1.355794e+02	-1.427024e+02	-4.939991e+01	-2.379618e+02	-1.446588e+02	-2.428122e+02	-2.282047e+02	-3.068150e+02	-2.387911e+02
7.410000e+02	4.327571e+03	-3.721560e+02	-1.895052e+01	-1.576173e+02	-3.988452e+02	-2.034206e+01	-9.809471e+01	-2.722319e+01	4.702874e+01	-6.597987e+01	-7.542414e+01	8.271792e+00	-1.658858e+02	-8.218913e+01	-2.263836e+02	-1.437333e+02	-2.551096e+02	-1.585146e+02
7.420000e+02	4.410089e+03	-9.481131e+01	9.553533e+01	-6.230381e+00	-2.355148e+02	5.651829e+01	1.019895e+00	2.260376e+01	8.418352e+01	1.135109e+01	2.216791e+00	7.293074e+01	-7.915737e+01	-8.442324e+00	-2.032382e+02	-4.414824e+01	-1.913645e+02	-6.416990e+01
7.430000e+02	4.457683e+03	1.847052e+02	2.065599e+02	1.463671e+02	-6.673805e+01	1.317623e+02	1.029672e+02	7.084741e+01	1.196803e+02	8.687879e+01	7.966365e+01	1.357118e+02	1.065991e+01	6.670937e+01	-1.765787e+02	5.808264e+01	-1.248189e+02	3.177345e+01
7.440000e+02	4.472809e+03	4.343299e+02	3.018898e+02	2.820832e+02	8.816961e+01	1.969595e+02	1.956860e+02	1.125862e+02	1.492013e+02	1.526876e+02	1.475570e+02	1.893031e+02	9.278582e+01	1.345334e+02	-1.488562e+02	1.514131e+02	-6.324198e+01	1.180243e+02
7.450000e+02	4.456124e+03	6.327774e+02	3.738794e+02	3.888395e+02	2.162472e+02	2.465297e+02	2.701613e+02	1.445268e+02	1.700021e+02	2.038763e+02	1.996209e+02	2.293521e+02	1.594944e+02	1.892271e+02	-1.215355e+02	2.275069e+02	-1.125874e+01	1.867698e+02
7.460000e+02	4.406767e+03	7.718090e+02	4.200092e+02	4.619830e+02	3.123914e+02	2.782832e+02	3.217518e+02	1.652336e+02	1.811367e+02	2.388715e+02	2.334206e+02	2.547752e+02	2.072161e+02	2.285723e+02	-9.528548e+01	2.823391e+02	3.005279e+01	2.346640e+02
7.470000e+02	4.324173e+03	8.542535e+02	4.418353e+02	5.032846e+02	3.782204e+02	2.929310e+02	3.501351e+02	1.748064e+02	1.831049e+02	2.587293e+02	2.499172e+02	2.670286e+02	2.362654e+02	2.533783e+02	-7.038772e+01	3.159325e+02	6.228764e+01	2.623777e+02
7.480000e+02	4.210492e+03	8.893291e+02	4.430742e+02	5.183508e+02	4.191782e+02	2.929812e+02	3.581621e+02	1.742566e+02	1.771724e+02	2.659008e+02	2.522338e+02	2.688174e+02	2.495437e+02	2.661287e+02	-4.712975e+01	3.310808e+02	8.809662e+01	2.731500e+02
7.490000e+02	4.072509e+03	8.875841e+02	4.277546e+02	5.137259e+02	4.412951e+02	2.815943e+02	3.502350e+02	1.649058e+02	1.646970e+02	2.630566e+02	2.442569e+02	2.628486e+02	2.508879e+02	2.694808e+02	-2.603831e+01	3.316967e+02	1.095973e+02	2.710676e+02
7.500000e+02	3.922191e+03	8.573365e+02	3.990821e+02	4.947361e+02	4.488330e+02	2.618044e+02	3.308245e+02	1.480307e+02	1.467005e+02	2.523807e+02	2.295731e+02	2.510512e+02	2.436953e+02	2.651746e+02	-7.925085e+00	3.214003e+02	1.274315e+02	2.597153e+02
7.510000e+02	3.775564e+03	8.033180e+02	3.591453e+02	4.645066e+02	4.433760e+02	2.361915e+02	3.034997e+02	1.247949e+02	1.237508e+02	2.353936e+02	2.109157e+02	2.343502e+02	2.301662e+02	2.536016e+02	6.205506e+00	3.027016e+02	1.406735e+02	2.415066e+02
7.520000e+02	3.650303e+03	7.270967e+02	3.091668e+02	4.239783e+02	4.242088e+02	2.068178e+02	2.705492e+02	9.634617e+01	9.606922e+01	2.130969e+02	1.900072e+02	2.128205e+02	2.111669e+02	2.339808e+02	1.532367e+01	2.768284e+02	1.473801e+02	2.176491e+02
7.530000e+02	3.562975e+03	6.283410e+02	2.499003e+02	3.724866e+02	3.894131e+02	1.751893e+02	2.330701e+02	6.391717e+01	6.373686e+01	1.861630e+02	1.675800e+02	1.859831e+02	1.865117e+02	2.049152e+02	1.857496e+01	2.440442e+02	1.453694e+02	1.884980e+02
7.540000e+02	3.526920e+03	5.061594e+02	1.819377e+02	3.085342e+02	3.371020e+02	1.421418e+02	1.913417e+02	2.882772e+01	2.691322e+01	1.550242e+02	1.434511e+02	1.531100e+02	1.554316e+02	1.650906e+02	1.548625e+01	2.042248e+02	1.328786e+02	1.540380e+02
7.550000e+02	3.551340e+03	3.602114e+02	1.059366e+02	2.306064e+02	2.664283e+02	1.077395e+02	1.453166e+02	-7.604396e+00	-1.395894e+01	1.198954e+02	1.166721e+02	1.135411e+02	1.170723e+02	1.139410e+02	6.136055e+00	1.574736e+02	1.089569e+02	1.143283e+02
7.560000e+02	3.641429e+03	1.916220e+02	2.288582e+01	1.379959e+02	1.782298e+02	7.135404e+01	9.509346e+01	-4.417185e+01	-5.796415e+01	8.085019e+01	8.584500e+01	6.705787e+01	7.094466e+01	5.215711e+01	-8.770644e+00	1.045909e+02	7.364169e+01	6.983820e+01
7.570000e+02	3.798748e+03	3.734453e+00	-6.554391e+01	3.156626e+01	7.528097e+01	3.201783e+01	4.125520e+01	-7.983493e+01	-1.035663e+02	3.802294e+01	4.962857e+01	1.429135e+01	1.728147e+01	-1.805636e+01	-2.797516e+01	4.726192e+01	2.802241e+01	2.163173e+01
7.580000e+02	4.020938e+03	-1.974367e+02	-1.566759e+02	-8.572437e+01	-3.785232e+01	-1.102150e+01	-1.500443e+01	-1.137059e+02	-1.485644e+02	-8.110569e+00	7.330650e+00	-4.296955e+01	-4.274815e+01	-9.304913e+01	-4.988531e+01	-1.209162e+01	-2.575698e+01	-2.862620e+01
7.590000e+02	4.300345e+03	-4.032819e+02	-2.467232e+02	-2.087465e+02	-1.553218e+02	-5.774275e+01	-7.197050e+01	-1.449844e+02	-1.902186e+02	-5.650313e+01	-4.061019e+01	-1.017381e+02	-1.070015e+02	-1.681304e+02	-7.286900e+01	-7.072876e+01	-8.458913e+01	-7.884426e+01
7.600000e+02	4.621953e+03	-6.032900e+02	-3.310291e+02	-3.306537e+02	-2.707337e+02	-1.069922e+02	-1.276217e+02	-1.728787e+02	-2.255653e+02	-1.054619e+02	-9.242215e+01	-1.581496e+02	-1.724971e+02	-2.382256e+02	-9.549688e+01	-1.260891e+02	-1.446406e+02	-1.267932e+02
7.610000e+02	4.961838e+03	-7.861559e+02	-4.046009e+02	-4.437367e+02	-3.778720e+02	-1.564232e+02	-1.798251e+02	-1.965320e+02	-2.518621e+02	-1.527366e+02	-1.451246e+02	-2.080679e+02	-2.356618e+02	-2.986062e+02	-1.166236e+02	-1.761360e+02	-2.017322e+02	-1.703797e+02
7.620000e+02	5.287593e+03	-9.408945e+02	-4.627243e+02	-5.403807e+02	-4.711558e+02	-2.027051e+02	-2.263966e+02	-2.149588e+02	-2.670351e+02	-1.956868e+02	-1.948955e+02	-2.477644e+02	-2.926095e+02	-3.454796e+02	-1.352755e+02	-2.193757e+02	-2.517769e+02	-2.077779e+02
7.630000e+02	5.561726e+03	-1.057603e+03	-5.014234e+02	-6.138222e+02	-5.457160e+02	-2.419039e+02	-2.650249e+02	-2.270062e+02	-2.699845e+02	-2.314363e+02	-2.375393e+02	-2.744160e+02	-3.393998e+02	-3.762777e+02	-1.504185e+02	-2.545548e+02	-2.911588e+02	-2.373742e+02
7.640000e+02	5.747943e+03	-1.127805e+03	-5.176538e+02	-6.585619e+02	-5.972051e+02	-2.699492e+02	-2.931804e+02	-2.313793e+02	-2.606516e+02	-2.569996e+02	-2.689518e+02	-2.862732e+02	-3.722829e+02	-3.896055e+02	-1.607535e+02	-2.802284e+02	-3.169756e+02	-2.576070e+02
7.650000e+02	5.818978e+03	-1.144626e+03	-5.093016e+02	-6.705117e+02	-6.216310e+02	-2.831512e+02	-3.081751e+02	-2.267758e+02	-2.398434e+02	-2.694558e+02	-2.855576e+02	-2.825247e+02	-3.879821e+02	-3.849502e+02	-1.646890e+02	-2.944774e+02	-3.271542e+02	-2.668665e+02
7.660000e+02	5.763803e+03	-1.103160e+03	-4.751821e+02	-6.470867e+02	-6.154992e+02	-2.787490e+02	-3.074729e+02	-2.121451e+02	-2.089094e+02	-2.662707e+02	-2.847415e+02	-2.630359e+02	-3.840467e+02	-3.623420e+02	-1.605653e+02	-2.949924e+02	-3.205091e+02	-2.635893e+02
7.670000e+02	5.591930e+03	-1.001205e+03	-4.152047e+02	-5.874238e+02	-5.763552e+02	-2.554327e+02	-2.891980e+02	-1.870255e+02	-1.694127e+02	-2.457904e+02	-2.652662e+02	-2.281784e+02	-3.592424e+02	-3.221551e+02	-1.470869e+02	-2.795538e+02	-2.968055e+02	-2.465657e+02
7.680000e+02	5.333281e+03	-8.402071e+02	-3.307252e+02	-4.927461e+02	-5.035499e+02	-2.137224e+02	-2.526587e+02	-1.518502e+02	-1.229289e+02	-2.077950e+02	-2.275932e+02	-1.788744e+02	-3.138695e+02	-2.651510e+02	-1.238153e+02	-2.467298e+02	-2.568256e+02	-2.153307e+02
7.690000e+02	5.033309e+03	-6.259950e+02	-2.249369e+02	-3.667234e+02	-3.988918e+02	-1.560634e+02	-1.986762e+02	-1.081022e+02	-7.103269e+01	-1.539033e+02	-1.739791e+02	-1.168344e+02	-2.498877e+02	-1.927429e+02	-9.153518e+01	-1.965149e+02	-2.023831e+02	-1.704524e+02
7.700000e+02	4.744393e+03	-3.689246e+02	-1.030802e+02	-2.156271e+02	-2.669025e+02	-8.656930e+01	-1.296102e+02	-5.824209e+01	-1.544525e+01	-8.763452e+01	-1.082651e+02	-4.483826e+01	-1.707882e+02	-1.073608e+02	-5.234637e+01	-1.306744e+02	-1.362343e+02	-1.135940e+02
7.710000e+02	4.515443e+03	-8.334351e+01	2.769026e+01	-4.816387e+01	-1.146176e+02	-1.047029e+01	-4.913503e+01	-5.420835e+00	4.175113e+01	-1.406072e+01	-3.539776e+01	3.311064e+01	-8.127463e+01	-1.276525e+01	-9.438202e+00	-5.272471e+01	-6.189815e+01	-4.736711e+01
7.720000e+02	4.382058e+03	2.133976e+02	1.587941e+02	1.249779e+02	4.889996e+01	6.655490e+01	3.807436e+01	4.692595e+01	9.794778e+01	6.084622e+01	3.916022e+01	1.118674e+02	1.310956e+01	8.581822e+01	3.337953e+01	3.236620e+01	1.653015e+01	2.488426e+01
7.730000e+02	4.359404e+03	5.020497e+02	2.809559e+02	2.917651e+02	2.131013e+02	1.389579e+02	1.265996e+02	9.547537e+01	1.499928e+02	1.309630e+02	1.099364e+02	1.854796e+02	1.062837e+02	1.818289e+02	7.224307e+01	1.186050e+02	9.449503e+01	9.922269e+01
7.740000e+02	4.439443e+03	7.625469e+02	3.850400e+02	4.395889e+02	3.664723e+02	2.016942e+02	2.104717e+02	1.373122e+02	1.943796e+02	1.906602e+02	1.717706e+02	2.477268e+02	1.918594e+02	2.678179e+02	1.037508e+02	1.994378e+02	1.670358e+02	1.711528e+02
7.750000e+02	4.593252e+03	9.752633e+02	4.629108e+02	5.562402e+02	4.971890e+02	2.504220e+02	2.834374e+02	1.701031e+02	2.276479e+02	2.352628e+02	2.200047e+02	2.928068e+02	2.634296e+02	3.362345e+02	1.253399e+02	2.682781e+02	2.289150e+02	2.356855e+02
7.760000e+02	4.778151e+03	1.122800e+03	5.083145e+02	6.312120e+02	5.941763e+02	2.816716e+02	3.394840e+02	1.921971e+02	2.469448e+02	2.613697e+02	2.507022e+02	3.161165e+02	3.150908e+02	3.805081e+02	1.355080e+02	3.191819e+02	2.750012e+02	2.876388e+02
7.770000e+02	4.948086e+03	1.192434e+03	5.177625e+02	6.573123e+02	6.486698e+02	2.931205e+02	3.736799e+02	2.027178e+02	2.506333e+02	2.671293e+02	2.610438e+02	3.150439e+02	3.422628e+02	3.962663e+02	1.339106e+02	3.476885e+02	3.009900e+02	3.222981e+02
7.780000e+02	5.064708e+03	1.178799e+03	4.912957e+02	6.322814e+02	6.560058e+02	2.839939e+02	3.831616e+02	2.016677e+02	2.387860e+02	2.525099e+02	2.498900e+02	2.896273e+02	3.426479e+02	3.823886e+02	1.213584e+02	3.516773e+02	3.043386e+02	3.363350e+02
7.790000e+02	5.106097e+03	1.085868e+03	4.328817e+02	5.598563e+02	6.170106e+02	2.554534e+02	3.679006e+02	1.900092e+02	2.133896e+02	2.194925e+02	2.183234e+02	2.428719e+02	3.169781e+02	3.415298e+02	9.971290e+01	3.319393e+02	2.850820e+02	3.286680e+02
7.800000e+02	5.070645e+03	9.272249e+02	3.501854e+02	4.497204e+02	5.383070e+02	2.107591e+02	3.308833e+02	1.696509e+02	1.781440e+02	1.720419e+02	1.698823e+02	1.805341e+02	2.691801e+02	2.798348e+02	7.166082e+01	2.921657e+02	2.461516e+02	3.008834e+02
7.810000e+02	4.975185e+03	7.241247e+02	2.535952e+02	3.160931e+02	4.312119e+02	1.550437e+02	2.775500e+02	1.432902e+02	1.378549e+02	1.157408e+02	1.102754e+02	1.103047e+02	2.057827e+02	2.058145e+02	4.036751e+01	2.382468e+02	1.929742e+02	2.569880e+02
7.820000e+02	4.848458e+03	5.017575e+02	1.546477e+02	1.752399e+02	3.094954e+02	9.468937e+01	2.146754e+02	1.141228e+02	9.755990e+01	5.708831e+01	4.656696e+01	4.052472e+01	1.347101e+02	1.286699e+02	9.059618e+00	1.770742e+02	1.324285e+02	2.025684e+02
7.830000e+02	4.722488e+03	2.848628e+02	6.422503e+01	4.261961e+01	1.867746e+02	3.645367e+01	1.491173e+02	8.547840e+01	6.162356e+01	2.601894e+00	-1.395387e+01	-2.125352e+01	6.386872e+01	5.657061e+01	-1.937399e+01	1.152655e+02	7.151432e+01	1.436933e+02
7.840000e+02	4.624700e+03	9.404460e+01	-9.020949e+00	-6.948582e+01	7.442242e+01	-1.344029e+01	8.687627e+01	6.045445e+01	3.305367e+01	-4.207431e+01	-6.489174e+01	-6.947556e+01	-1.423711e-02	-4.597005e+00	-4.267381e+01	5.824222e+01	1.618312e+01	8.597349e+01
7.850000e+02	4.572750e+03	-5.631813e+01	-5.966570e+01	-1.532736e+02	-1.946136e+01	-5.006820e+01	3.268142e+01	4.159072e+01	1.320471e+01	-7.287026e+01	-1.015676e+02	-1.012567e+02	-5.202073e+01	-5.170912e+01	-5.935171e+01	9.879368e+00	-2.933984e+01	3.404200e+01
7.860000e+02	4.572526e+03	-1.584642e+02	-8.579949e+01	-2.055406e+02	-9.003569e+01	-7.033407e+01	-9.997560e+00	3.059621e+01	1.900591e+00	-8.770010e+01	-1.214163e+02	-1.163961e+02	-8.914844e+01	-8.412789e+01	-6.870415e+01	-2.736360e+01	-6.267285e+01	-8.553099e+00
7.870000e+02	4.618679e+03	-2.105100e+02	-8.869162e+01	-2.269486e+02	-1.351345e+02	-7.325205e+01	-3.881844e+01	2.813481e+01	-2.127173e+00	-8.656463e+01	-1.240014e+02	-1.168271e+02	-1.101259e+02	-1.029514e+02	-7.075790e+01	-5.213113e+01	-8.300527e+01	-3.926495e+01
7.880000e+02	4.696661e+03	-2.153533e+02	-7.205167e+01	-2.209535e+02	-1.546931e+02	-5.999173e+01	-5.259581e+01	3.370143e+01	-6.714582e-01	-7.138053e+01	-1.107849e+02	-1.057540e+02	-1.152043e+02	-1.101734e+02	-6.620141e+01	-6.398489e+01	-9.071078e+01	-5.653141e+01
7.890000e+02	4.785529e+03	-1.797468e+02	-4.113365e+01	-1.928308e+02	-1.505213e+02	-3.368275e+01	-5.155643e+01	4.564567e+01	4.454321e+00	-4.558839e+01	-8.478059e+01	-8.678055e+01	-1.060556e+02	-1.080556e+02	-5.631027e+01	-6.346259e+01	-8.706141e+01	-5.994337e+01
7.900000e+02	4.861243e+03	-1.135962e+02	-1.874986e+00	-1.489693e+02	-1.263595e+02	1.038356e+00	-3.762883e+01	6.139441e+01	1.172172e+01	-1.359716e+01	-5.014454e+01	-6.327091e+01	-8.570426e+01	-9.883064e+01	-4.282818e+01	-5.226515e+01	-7.409689e+01	-5.050495e+01
7.910000e+02	4.900387e+03	-2.916486e+01	3.983133e+01	-9.634342e+01	-8.786267e+01	3.873404e+01	-1.445049e+01	7.787622e+01	1.996030e+01	1.987060e+01	-1.168323e+01	-3.804660e+01	-5.830301e+01	-8.466632e+01	-2.775378e+01	-3.331505e+01	-5.454982e+01	-3.075187e+01
7.920000e+02	4.884094e+03	6.019997e+01	7.872217e+01	-4.195193e+01	-4.212671e+01	7.405860e+01	1.313877e+01	9.208095e+01	2.826450e+01	5.045731e+01	2.576066e+01	-1.336058e+01	-2.859772e+01	-6.771879e+01	-1.302205e+01	-1.046394e+01	-3.166458e+01	-4.507523e+00
7.930000e+02	4.801654e+03	1.419429e+02	1.106465e+02	7.925877e+00	3.386087e+00	1.026942e+02	4.009899e+01	1.016302e+02	3.585938e+01	7.478691e+01	5.802582e+01	9.014502e+00	-1.095034e+00	-5.010604e+01	-1.382441e-01	1.219002e+01	-8.805423e+00	2.378338e+01
7.940000e+02	4.652981e+03	2.064736e+02	1.329655e+02	4.861068e+01	4.230551e+01	1.221245e+02	6.239436e+01	1.052153e+02	4.204122e+01	9.092423e+01	8.233351e+01	2.774866e+01	2.085568e+01	-3.372873e+01	1.011944e+01	3.119223e+01	1.111197e+01	4.998479e+01
7.950000e+02	4.449158e+03	2.489651e+02	1.448199e+02	7.778369e+01	7.069663e+01	1.320283e+02	7.795250e+01	1.027848e+02	4.623897e+01	9.858095e+01	9.776715e+01	4.203371e+01	3.574382e+01	-1.998907e+01	1.780458e+01	4.450314e+01	2.619224e+01	7.114481e+01
7.960000e+02	4.210600e+03	2.700313e+02	1.471435e+02	9.577985e+01	8.774089e+01	1.341389e+02	8.698583e+01	9.543048e+01	4.815174e+01	9.899192e+01	1.053223e+02	5.171194e+01	4.406199e+01	-9.547734e+00	2.364643e+01	5.183684e+01	3.590285e+01	8.598629e+01
7.970000e+02	3.962964e+03	2.748433e+02	1.423061e+02	1.051670e+02	9.543060e+01	1.315530e+02	9.152399e+01	8.499775e+01	4.786093e+01	9.444532e+01	1.074284e+02	5.730749e+01	4.785389e+01	-2.266374e+00	2.866374e+01	5.441433e+01	4.101522e+01	9.482793e+01
7.980000e+02	3.731687e+03	2.708114e+02	1.333662e+02	1.096255e+02	9.733851e+01	1.276531e+02	9.432445e+01	7.352681e+01	4.582137e+01	8.754496e+01	1.070319e+02	5.983872e+01	4.978148e+01	2.588969e+00	3.367370e+01	5.421427e+01	4.312361e+01	9.898389e+01
7.990000e+02	3.536575e+03	2.645357e+02	1.230763e+02	1.124347e+02	9.688648e+01	1.249542e+02	9.757572e+01	6.267361e+01	4.269596e+01	8.038046e+01	1.065123e+02	6.040221e+01	5.202746e+01	5.917996e+00	3.886833e+01	5.299990e+01	4.388668e+01	9.989244e+01
8.000000e+02	3.388074e+03	2.590134e+02	1.129037e+02	1.150461e+02	9.571091e+01	1.242304e+02	1.018731e+02	5.325951e+01	3.907147e+01	7.383238e+01	1.067865e+02	5.964388e+01	5.539726e+01	8.255136e+00	4.360791e+01	5.147291e+01	4.423914e+01	9.830324e+01
8.010000e+02	3.286445e+03	2.519983e+02	1.023590e+02	1.162029e+02	9.265551e+01	1.241943e+02	1.058162e+02	4.505560e+01	3.514563e+01	6.721343e+01	1.068966e+02	5.730308e+01	5.889482e+01	9.301610e+00	4.650494e+01	4.883290e+01	4.382497e+01	9.379093e+01
8.020000e+02	3.224162e+03	2.360098e+02	8.885104e+01	1.118911e+02	8.368926e+01	1.218210e+02	1.063274e+02	3.684231e+01	3.049425e+01	5.835692e+01	1.042100e+02	5.200850e+01	5.987745e+01	7.676118e+00	4.577587e+01	4.286086e+01	4.083198e+01	8.471946e+01
8.030000e+02	3.190673e+03	2.000264e+02	6.816959e+01	9.617703e+01	6.278236e+01	1.132172e+02	9.955054e+01	2.672667e+01	2.401921e+01	4.415055e+01	9.516770e+01	4.144273e+01	5.472880e+01	1.003880e+00	3.975992e+01	3.048124e+01	3.230562e+01	6.864379e+01
8.040000e+02	3.177660e+03	1.325242e+02	3.556458e+01	6.279099e+01	2.356599e+01	9.480294e+01	8.203913e+01	1.265845e+01	1.414622e+01	2.141860e+01	7.637717e+01	2.290600e+01	3.987908e+01	-1.359214e+01	2.746211e+01	8.652155e+00	1.491874e+01	4.305221e+01
8.050000e+02	3.182593e+03	2.526510e+01	-1.273392e+01	7.164577e+00	-3.854170e+01	6.451670e+01	5.192445e+01	-6.943065e+00	-7.194858e-01	-1.201414e+01	4.578263e+01	-5.790896e+00	1.294917e+01	-3.862446e+01	8.974681e+00	-2.460898e+01	-1.392812e+01	6.311542e+00
8.060000e+02	3.208942e+03	-1.229793e+02	-7.786378e+01	-7.151459e+01	-1.241902e+02	2.276448e+01	9.795942e+00	-3.257222e+01	-2.156262e+01	-5.630082e+01	3.638774e+00	-4.529147e+01	-2.622971e+01	-7.516009e+01	-1.434179e+01	-6.927180e+01	-5.491483e+01	-4.136805e+01
8.070000e+02	3.262801e+03	-3.037720e+02	-1.570039e+02	-1.687956e+02	-2.285074e+02	-2.713836e+01	-4.090658e+01	-6.318595e+01	-4.813391e+01	-1.088696e+02	-4.696745e+01	-9.381767e+01	-7.498467e+01	-1.218350e+02	-3.998587e+01	-1.226400e+02	-1.058655e+02	-9.720057e+01
8.080000e+02	3.347319e+03	-4.984833e+02	-2.428989e+02	-2.746115e+02	-3.406982e+02	-7.922027e+01	-9.413248e+01	-9.608776e+01	-7.857057e+01	-1.643279e+02	-1.002576e+02	-1.468107e+02	-1.278074e+02	-1.743606e+02	-6.474947e+01	-1.792421e+02	-1.614564e+02	-1.556282e+02
8.090000e+02	3.457559e+03	-6.806539e+02	-3.246472e+02	-3.745208e+02	-4.453183e+02	-1.258722e+02	-1.421517e+02	-1.272718e+02	-1.094671e+02	-2.151797e+02	-1.486687e+02	-1.973747e+02	-1.771523e+02	-2.258585e+02	-8.537645e+01	-2.314609e+02	-2.138599e+02	-2.089209e+02
8.100000e+02	3.578522e+03	-8.212591e+02	-3.898191e+02	-4.525599e+02	-5.252850e+02	-1.595043e+02	-1.770924e+02	-1.522337e+02	-1.364720e+02	-2.533467e+02	-1.844382e+02	-2.375845e+02	-2.149810e+02	-2.681275e+02	-9.929094e+01	-2.709362e+02	-2.543532e+02	-2.486324e+02
8.110000e+02	3.687839e+03	-8.958316e+02	-4.274843e+02	-4.951254e+02	-5.660618e+02	-1.744735e+02	-1.927956e+02	-1.670873e+02	-1.552974e+02	-2.721864e+02	-2.015300e+02	-2.603960e+02	-2.347343e+02	-2.936006e+02	-1.052035e+02	-2.905096e+02	-2.755581e+02	-2.676547e+02
8.120000e+02	3.762654e+03	-8.914661e+02	-4.312956e+02	-4.948031e+02	-5.598689e+02	-1.687348e+02	-1.865123e+02	-1.696792e+02	-1.628634e+02	-2.684316e+02	-1.973653e+02	-2.616152e+02	-2.331918e+02	-2.974422e+02	-1.034242e+02	-2.862100e+02	-2.736656e+02	-2.623029e+02
8.130000e+02	3.788187e+03	-8.114310e+02	-4.016258e+02	-4.528994e+02	-5.085405e+02	-1.446685e+02	-1.599178e+02	-1.603420e+02	-1.582237e+02	-2.434014e+02	-1.737925e+02	-2.412825e+02	-2.116197e+02	-2.791104e+02	-9.579249e+01	-2.586513e+02	-2.498958e+02	-2.337296e+02
8.140000e+02	3.764505e+03	-6.756987e+02	-3.460002e+02	-3.797775e+02	-4.239620e+02	-1.087615e+02	-1.190704e+02	-1.420136e+02	-1.429781e+02	-2.030214e+02	-1.369254e+02	-2.039852e+02	-1.757939e+02	-2.428546e+02	-8.524661e+01	-2.133306e+02	-2.106373e+02	-1.881178e+02
8.150000e+02	3.708511e+03	-5.170228e+02	-2.776282e+02	-2.928171e+02	-3.257859e+02	-7.020113e+01	-7.326557e+01	-1.196514e+02	-1.210402e+02	-1.565872e+02	-9.584969e+01	-1.579754e+02	-1.348421e+02	-1.969690e+02	-7.515932e+01	-1.596518e+02	-1.661388e+02	-1.354945e+02
8.160000e+02	3.649981e+03	-3.736587e+02	-2.124704e+02	-2.126025e+02	-2.370349e+02	-3.880440e+01	-3.308624e+01	-9.910053e+01	-9.782554e+01	-1.146442e+02	-6.057600e+01	-1.133685e+02	-9.923329e+01	-1.520273e+02	-6.862032e+01	-1.089260e+02	-1.281119e+02	-8.747880e+01
8.170000e+02	3.622773e+03	-2.808040e+02	-1.656984e+02	-1.584294e+02	-1.788441e+02	-2.288583e+01	-8.174287e+00	-8.574008e+01	-7.908175e+01	-8.661615e+01	-3.982754e+01	-7.995702e+01	-7.847060e+01	-1.186019e+02	-6.783752e+01	-7.190440e+01	-1.069407e+02	-5.461647e+01
8.180000e+02	3.654143e+03	-2.629855e+02	-1.484762e+02	-1.442664e+02	-1.657468e+02	-2.759718e+01	-5.255913e+00	-8.327120e+01	-6.965031e+01	-7.882560e+01	-3.922983e+01	-6.520379e+01	-7.906009e+01	-1.050361e+02	-7.377705e+01	-5.648406e+01	-1.092617e+02	-4.403064e+01
8.190000e+02	3.755731e+03	-3.290729e+02	-1.657638e+02	-1.759947e+02	-2.026100e+02	-5.404284e+01	-2.681064e+01	-9.294095e+01	-7.242958e+01	-9.333421e+01	-6.026798e+01	-7.282180e+01	-1.031699e+02	-1.157261e+02	-8.609209e+01	-6.610173e+01	-1.365055e+02	-5.795523e+01
8.200000e+02	3.919132e+03	-4.707813e+02	-2.155061e+02	-2.503483e+02	-2.838097e+02	-9.923354e+01	-7.059082e+01	-1.133603e+02	-8.774804e+01	-1.277583e+02	-1.001404e+02	-1.021449e+02	-1.482003e+02	-1.502074e+02	-1.033252e+02	-9.911535e+01	-1.846900e+02	-9.343533e+01
8.210000e+02	4.117319e+03	-6.648028e+02	-2.892814e+02	-3.556780e+02	-3.947339e+02	-1.567982e+02	-1.300652e+02	-1.409340e+02	-1.132810e+02	-1.760009e+02	-1.524684e+02	-1.483466e+02	-2.073285e+02	-2.032094e+02	-1.233123e+02	-1.492677e+02	-2.454606e+02	-1.432031e+02
8.220000e+02	4.311326e+03	-8.781376e+02	-3.742718e+02	-4.744441e+02	-5.152736e+02	-2.183160e+02	-1.957551e+02	-1.707933e+02	-1.445582e+02	-2.297142e+02	-2.087178e+02	-2.034776e+02	-2.709641e+02	-2.657268e+02	-1.436730e+02	-2.071532e+02	-3.081140e+02	-1.975128e+02
8.230000e+02	4.459968e+03	-1.075615e+03	-4.561974e+02	-5.870704e+02	-6.245642e+02	-2.750681e+02	-2.572802e+02	-1.980089e+02	-1.759925e+02	-2.802057e+02	-2.600845e+02	-2.581877e+02	-3.288813e+02	-3.269872e+02	-1.622492e+02	-2.624177e+02	-3.621396e+02	-2.465263e+02
8.240000e+02	4.529653e+03	-1.227934e+03	-5.225857e+02	-6.763805e+02	-7.058567e+02	-3.198813e+02	-3.057012e+02	-2.187745e+02	-2.022062e+02	-3.203803e+02	-2.994522e+02	-3.038104e+02	-3.725697e+02	-3.769304e+02	-1.773840e+02	-3.062000e+02	-3.996497e+02	-2.826730e+02
8.250000e+02	4.501486e+03	-1.318086e+03	-5.655158e+02	-7.314508e+02	-7.501943e+02	-3.486026e+02	-3.355381e+02	-2.312261e+02	-2.192983e+02	-3.462184e+02	-3.229079e+02	-3.342889e+02	-3.971626e+02	-4.085458e+02	-1.879990e+02	-3.331537e+02	-4.170338e+02	-3.023367e+02
8.260000e+02	4.373958e+03	-1.344143e+03	-5.829897e+02	-7.496598e+02	-7.577572e+02	-3.607374e+02	-3.458169e+02	-2.356439e+02	-2.256571e+02	-3.573335e+02	-3.303341e+02	-3.473451e+02	-4.023165e+02	-4.193292e+02	-1.935256e+02	-3.424126e+02	-4.153380e+02	-3.063390e+02
8.270000e+02	4.161057e+03	-1.317483e+03	-5.784596e+02	-7.361993e+02	-7.364374e+02	-3.590043e+02	-3.397638e+02	-2.339775e+02	-2.220492e+02	-3.564111e+02	-3.248538e+02	-3.444814e+02	-3.917207e+02	-4.113495e+02	-1.937948e+02	-3.371703e+02	-3.992609e+02	-2.990506e+02
8.280000e+02	3.887103e+03	-1.257117e+03	-5.587119e+02	-7.012428e+02	-6.981955e+02	-3.479539e+02	-3.232583e+02	-2.288826e+02	-2.109749e+02	-3.477377e+02	-3.113293e+02	-3.298287e+02	-3.714178e+02	-3.899178e+02	-1.889861e+02	-3.230417e+02	-3.751479e+02	-2.864505e+02
8.290000e+02	3.580440e+03	-1.182347e+03	-5.309628e+02	-6.559056e+02	-6.546028e+02	-3.321844e+02	-3.026433e+02	-2.226420e+02	-1.955659e+02	-3.353974e+02	-2.944977e+02	-3.083203e+02	-3.475896e+02	-3.614123e+02	-1.796538e+02	-3.058560e+02	-3.487413e+02	-2.738622e+02
8.300000e+02	3.268010e+03	-1.106560e+03	-5.003221e+02	-6.085873e+02	-6.132423e+02	-3.148477e+02	-2.827278e+02	-2.163834e+02	-1.784738e+02	-3.218486e+02	-2.774637e+02	-2.839384e+02	-3.246538e+02	-3.311280e+02	-1.667781e+02	-2.897286e+02	-3.235086e+02	-2.642118e+02
8.310000e+02	2.971982e+03	-1.034333e+03	-4.685625e+02	-5.630221e+02	-5.761881e+02	-2.969836e+02	-2.656749e+02	-2.098617e+02	-1.611644e+02	-3.073983e+02	-2.610822e+02	-2.587006e+02	-3.043267e+02	-3.019443e+02	-1.517499e+02	-2.760896e+02	-3.000939e+02	-2.574042e+02
8.320000e+02	2.708528e+03	-9.624876e+02	-4.345047e+02	-5.185222e+02	-5.408337e+02	-2.778279e+02	-2.510394e+02	-2.018271e+02	-1.438271e+02	-2.906776e+02	-2.443468e+02	-2.326776e+02	-2.858501e+02	-2.741799e+02	-1.362396e+02	-2.638892e+02	-2.769406e+02	-2.509264e+02
8.330000e+02	2.487942e+03	-8.840318e+02	-3.956226e+02	-4.719437e+02	-5.023794e+02	-2.558227e+02	-2.367329e+02	-1.907586e+02	-1.258294e+02	-2.697930e+02	-2.254758e+02	-2.048641e+02	-2.670852e+02	-2.464724e+02	-1.219675e+02	-2.507035e+02	-2.516728e+02	-2.412925e+02
8.340000e+02	2.315170e+03	-7.929993e+02	-3.500264e+02	-4.202910e+02	-4.567490e+02	-2.298077e+02	-2.203798e+02	-1.756241e+02	-1.064412e+02	-2.435848e+02	-2.031508e+02	-1.744026e+02	-2.458940e+02	-2.171446e+02	-1.104530e+02	-2.341575e+02	-2.225892e+02	-2.256735e+02
8.350000e+02	2.190143e+03	-6.881591e+02	-2.979660e+02	-3.628340e+02	-4.027704e+02	-1.998896e+02	-2.004985e+02	-1.563673e+02	-8.549686e+01	-2.124686e+02	-1.773995e+02	-1.415992e+02	-2.212403e+02	-1.854390e+02	-1.028314e+02	-2.130782e+02	-1.896906e+02	-2.030937e+02
8.360000e+02	2.108007e+03	-5.744398e+02	-2.423401e+02	-3.020434e+02	-3.429767e+02	-1.677102e+02	-1.771463e+02	-1.339832e+02	-6.375007e+01	-1.785893e+02	-1.498511e+02	-1.083574e+02	-1.936911e+02	-1.521966e+02	-9.979036e+01	-1.880263e+02	-1.549494e+02	-1.748530e+02
8.370000e+02	2.059737e+03	-4.620011e+02	-1.881808e+02	-2.432461e+02	-2.830355e+02	-1.361215e+02	-1.519540e+02	-1.102318e+02	-4.284095e+01	-1.453390e+02	-1.233883e+02	-7.794958e+01	-1.653012e+02	-1.198619e+02	-1.016236e+02	-1.611726e+02	-1.218623e+02	-1.441801e+02
8.380000e+02	2.033683e+03	-3.637061e+02	-1.414536e+02	-1.933593e+02	-2.302759e+02	-1.084866e+02	-1.276891e+02	-8.716713e+01	-2.494048e+01	-1.165123e+02	-1.014196e+02	-5.428707e+01	-1.390762e+02	-9.194338e+01	-1.083510e+02	-1.357162e+02	-9.455934e+01	-1.153750e+02
8.390000e+02	2.018104e+03	-2.920206e+02	-1.076434e+02	-1.592192e+02	-1.919171e+02	-8.788368e+01	-1.075657e+02	-6.667741e+01	-1.221662e+01	-9.542594e+01	-8.705193e+01	-4.096644e+01	-1.182560e+02	-7.217046e+01	-1.198319e+02	-1.151093e+02	-7.680756e+01	-9.277188e+01
8.400000e+02	2.004111e+03	-2.561749e+02	-9.051331e+01	-1.459448e+02	-1.734684e+02	-7.642904e+01	-9.448969e+01	-5.016332e+01	-6.274270e+00	-8.423830e+01	-8.237501e+01	-4.035030e+01	-1.055968e+02	-6.357231e+01	-1.358039e+02	-1.023003e+02	-7.116800e+01	-7.979263e+01
8.410000e+02	1.988018e+03	-2.600654e+02	-9.125231e+01	-1.556143e+02	-1.775463e+02	-7.482375e+01	-9.036697e+01	-3.838426e+01	-7.692046e+00	-8.355967e+01	-8.796641e+01	-5.286818e+01	-1.027477e+02	-6.764980e+01	-1.558209e+02	-9.910407e+01	-7.844232e+01	-7.824041e+01
8.420000e+02	1.972091e+03	-3.011035e+02	-1.080865e+02	-1.864367e+02	-2.032004e+02	-8.215478e+01	-9.557048e+01	-3.143181e+01	-1.574490e+01	-9.234114e+01	-1.026579e+02	-7.665459e+01	-1.097830e+02	-8.378015e+01	-1.791136e+02	-1.057578e+02	-9.744286e+01	-8.789704e+01
8.430000e+02	1.963247e+03	-3.701299e+02	-1.363789e+02	-2.325776e+02	-2.457943e+02	-9.595408e+01	-1.086689e+02	-2.877535e+01	-2.837799e+01	-1.080007e+02	-1.235858e+02	-1.076033e+02	-1.249747e+02	-1.089927e+02	-2.044517e+02	-1.207162e+02	-1.250787e+02	-1.064576e+02
8.440000e+02	1.970095e+03	-4.524987e+02	-1.692353e+02	-2.847870e+02	-2.975023e+02	-1.125230e+02	-1.265159e+02	-2.935181e+01	-4.246986e+01	-1.267654e+02	-1.465500e+02	-1.398831e+02	-1.449039e+02	-1.382375e+02	-2.301089e+02	-1.407587e+02	-1.567445e+02	-1.298308e+02
8.450000e+02	1.999378e+03	-5.303430e+02	-1.985989e+02	-3.318684e+02	-3.484493e+02	-1.275149e+02	-1.447511e+02	-3.170624e+01	-5.437539e+01	-1.442235e+02	-1.666792e+02	-1.668921e+02	-1.649761e+02	-1.651894e+02	-2.540044e+02	-1.614599e+02	-1.869906e+02	-1.528063e+02
8.460000e+02	2.053144e+03	-5.857875e+02	-2.167171e+02	-3.628093e+02	-3.884014e+02	-1.367162e+02	-1.586554e+02	-3.420158e+01	-6.066699e+01	-1.560503e+02	-1.793269e+02	-1.825149e+02	-1.802941e+02	-1.834822e+02	-2.740258e+02	-1.779895e+02	-2.104131e+02	-1.700200e+02
8.470000e+02	2.127620e+03	-6.045432e+02	-2.177215e+02	-3.691346e+02	-4.087338e+02	-1.368910e+02	-1.641837e+02	-3.529647e+01	-5.891621e+01	-1.588056e+02	-1.810283e+02	-1.824244e+02	-1.867098e+02	-1.881059e+02	-2.884466e+02	-1.860982e+02	-2.226365e+02	-1.770475e+02
8.480000e+02	2.214025e+03	-5.790560e+02	-1.989546e+02	-3.468837e+02	-4.042400e+02	-1.265010e+02	-1.589087e+02	-3.385172e+01	-4.831379e+01	-1.506412e+02	-1.702845e+02	-1.651022e+02	-1.817811e+02	-1.765985e+02	-2.962929e+02	-1.830487e+02	-2.211916e+02	-1.713755e+02
8.490000e+02	2.300820e+03	-5.103560e+02	-1.616762e+02	-2.976417e+02	-3.743051e+02	-1.061082e+02	-1.426114e+02	-2.939149e+01	-2.994269e+01	-1.317340e+02	-1.479523e+02	-1.322841e+02	-1.653571e+02	-1.496884e+02	-2.975146e+02	-1.682371e+02	-2.060672e+02	-1.529907e+02
8.500000e+02	2.376496e+03	-4.080047e+02	-1.109125e+02	-2.282930e+02	-3.230738e+02	-7.833060e+01	-1.173407e+02	-2.223409e+01	-6.601418e+00	-1.043117e+02	-1.171079e+02	-8.867772e+01	-1.396144e+02	-1.111837e+02	-2.928926e+02	-1.433217e+02	-1.797501e+02	-1.243961e+02
8.510000e+02	2.431981e+03	-2.880175e+02	-5.442427e+01	-1.495181e+02	-2.584932e+02	-4.732762e+01	-8.690759e+01	-1.342770e+01	1.780113e+01	-7.222617e+01	-8.239440e+01	-4.099586e+01	-1.085210e+02	-6.712190e+01	-2.837207e+02	-1.118063e+02	-1.466836e+02	-9.001436e+01
8.520000e+02	2.462092e+03	-1.691803e+02	-1.007154e+00	-7.339549e+01	-1.904157e+02	-1.790358e+01	-5.593814e+01	-4.475948e+00	3.913620e+01	-4.014426e+01	-4.900051e+01	3.469551e+00	-7.686346e+01	-2.439282e+01	-2.713965e+02	-7.817926e+01	-1.122321e+02	-5.510695e+01
8.530000e+02	2.465928e+03	-6.864233e+01	4.148760e+01	-1.069780e+01	-1.282310e+02	5.577923e+00	-2.872535e+01	3.095290e+00	5.400772e+01	-1.252116e+01	-2.151310e+01	3.839314e+01	-4.908900e+01	1.081777e+01	-2.570826e+02	-4.682510e+01	-8.140052e+01	-2.448667e+01
8.540000e+02	2.446379e+03	2.086208e+00	6.793447e+01	3.145713e+01	-7.865765e+01	2.021508e+01	-8.184386e+00	8.213702e+00	6.052601e+01	7.407291e+00	-2.919495e+00	5.972167e+01	-2.826230e+01	3.437927e+01	-2.415514e+02	-2.099302e+01	-5.765867e+01	-1.372354e+00
8.550000e+02	2.409156e+03	3.964738e+01	7.706582e+01	5.102624e+01	-4.432083e+01	2.525832e+01	4.801343e+00	1.062672e+01	5.870774e+01	1.835679e+01	5.995376e+00	6.644006e+01	-1.541137e+01	4.503359e+01	-2.252302e+02	-2.101118e+00	-4.221351e+01	1.328946e+01
8.560000e+02	2.361709e+03	4.913078e+01	7.164148e+01	5.117790e+01	-2.353626e+01	2.226284e+01	1.144835e+01	1.101973e+01	5.040297e+01	2.123714e+01	6.700572e+00	6.062275e+01	-9.442257e+00	4.448006e+01	-2.083713e+02	1.042175e+01	-3.395194e+01	2.083591e+01
8.570000e+02	2.312274e+03	4.203504e+01	5.758249e+01	3.911318e+01	-1.136717e+01	1.462870e+01	1.452435e+01	1.082131e+01	3.877347e+01	1.880759e+01	2.399744e+00	4.676219e+01	-7.646321e+00	3.671614e+01	-1.912311e+02	1.870247e+01	-3.006405e+01	2.422878e+01
8.580000e+02	2.269139e+03	3.249385e+01	4.228857e+01	2.390123e+01	-1.607563e+00	6.635739e+00	1.734696e+01	1.174262e+01	2.746705e+01	1.482007e+01	-2.920901e+00	3.054696e+01	-6.642970e+00	2.682481e+01	-1.741683e+02	2.553077e+01	-2.713349e+01	2.693369e+01
8.590000e+02	2.240036e+03	3.293275e+01	3.261454e+01	1.395215e+01	1.096999e+01	2.251019e+00	2.265442e+01	1.520526e+01	1.971477e+01	1.289833e+01	-5.605542e+00	1.741024e+01	-3.455269e+00	1.956038e+01	-1.576392e+02	3.330151e+01	-2.232765e+01	3.170254e+01
8.600000e+02	2.231520e+03	5.051042e+01	3.309393e+01	1.485935e+01	2.885140e+01	4.072606e+00	3.172479e+01	2.186193e+01	1.759132e+01	1.550123e+01	-3.276738e+00	1.123290e+01	3.629344e+00	1.813884e+01	-1.421331e+02	4.315356e+01	-1.429936e+01	3.965883e+01
8.610000e+02	2.248258e+03	8.539675e+01	4.490985e+01	2.820292e+01	5.106053e+01	1.272734e+01	4.402791e+01	3.137882e+01	2.161585e+01	2.329274e+01	4.649670e+00	1.353183e+01	1.467404e+01	2.355610e+01	-1.281162e+02	5.459382e+01	-3.531600e+00	4.997634e+01
8.620000e+02	2.292289e+03	1.312577e+02	6.584694e+01	5.155874e+01	7.363776e+01	2.687373e+01	5.748742e+01	4.254049e+01	3.075524e+01	3.509063e+01	1.699553e+01	2.330712e+01	2.825462e+01	3.456620e+01	-1.160293e+02	6.570518e+01	7.933265e+00	6.022268e+01
8.630000e+02	2.362470e+03	1.775331e+02	9.112440e+01	7.954566e+01	9.103095e+01	4.374216e+01	6.919873e+01	5.360705e+01	4.277091e+01	4.835264e+01	3.131798e+01	3.751785e+01	4.203085e+01	4.823084e+01	-1.063291e+02	7.381038e+01	1.722042e+01	6.719816e+01
8.640000e+02	2.454336e+03	2.125369e+02	1.147448e+02	1.054355e+02	9.781246e+01	5.996662e+01	7.629571e+01	6.276231e+01	5.477025e+01	5.997397e+01	4.464654e+01	5.198279e+01	5.345571e+01	6.079224e+01	-9.952029e+01	7.630451e+01	2.150722e+01	6.793545e+01
8.650000e+02	2.560576e+03	2.262901e+02	1.308969e+02	1.227628e+02	9.009890e+01	7.239907e+01	7.665060e+01	6.848141e+01	6.380541e+01	6.709126e+01	5.418997e+01	6.241562e+01	6.035023e+01	6.857633e+01	-9.611902e+01	7.134449e+01	1.875338e+01	6.050503e+01
8.660000e+02	2.672116e+03	2.123166e+02	1.350373e+02	1.265102e+02	6.626843e+01	7.866532e+01	6.921632e+01	6.971525e+01	6.739618e+01	6.764121e+01	5.781512e+01	6.532200e+01	6.119118e+01	6.869870e+01	-9.652197e+01	5.819413e+01	8.073222e+00	4.439467e+01
8.670000e+02	2.779606e+03	1.681925e+02	1.244763e+02	1.137069e+02	2.692026e+01	7.737664e+01	5.400617e+01	6.589541e+01	6.390822e+01	6.056845e+01	5.424175e+01	5.858065e+01	5.512920e+01	5.946890e+01	-1.008170e+02	3.720006e+01	-1.028071e+01	2.043199e+01
8.680000e+02	2.874980e+03	9.514766e+01	9.850160e+01	8.353009e+01	-2.567542e+01	6.807059e+01	3.185208e+01	5.684833e+01	5.276348e+01	4.573873e+01	4.302957e+01	4.165289e+01	4.188006e+01	4.050430e+01	-1.086176e+02	9.522427e+00	-3.519848e+01	-9.603817e+00
8.690000e+02	2.952708e+03	-2.748694e+00	5.819688e+01	3.711607e+01	-8.826561e+01	5.104044e+01	4.124493e+00	4.272924e+01	3.448521e+01	2.371249e+01	2.449033e+01	1.546717e+01	2.165166e+01	1.262949e+01	-1.190112e+02	-2.320119e+01	-6.506472e+01	-4.345921e+01
8.700000e+02	3.010450e+03	-1.193722e+02	6.122273e+00	-2.273679e+01	-1.571503e+02	2.719476e+01	-2.746760e+01	2.404025e+01	1.058938e+01	-4.466128e+00	-3.800953e-01	-1.791847e+01	-4.815659e+00	-2.235302e+01	-1.306716e+02	-5.912624e+01	-9.802403e+01	-7.879389e+01
8.710000e+02	3.049027e+03	-2.471381e+02	-5.404436e+01	-9.190808e+01	-2.284727e+02	-2.005330e+00	-6.098953e+01	1.716628e+00	-1.665694e+01	-3.738632e+01	-2.994693e+01	-5.576144e+01	-3.614406e+01	-6.195761e+01	-1.421103e+02	-9.636838e+01	-1.321041e+02	-1.134126e+02
8.720000e+02	3.071757e+03	-3.775129e+02	-1.178901e+02	-1.653730e+02	-2.983509e+02	-3.458529e+01	-9.438090e+01	-2.280078e+01	-4.457649e+01	-7.331243e+01	-6.203247e+01	-9.508969e+01	-7.028076e+01	-1.033371e+02	-1.519723e+02	-1.331061e+02	-1.652443e+02	-1.453811e+02
8.730000e+02	3.083353e+03	-5.016475e+02	-1.807024e+02	-2.377520e+02	-3.630037e+02	-6.817255e+01	-1.256203e+02	-4.760305e+01	-7.047328e+01	-1.102278e+02	-9.414323e+01	-1.330995e+02	-1.046500e+02	-1.436056e+02	-1.592617e+02	-1.676739e+02	-1.953294e+02	-1.731071e+02
8.740000e+02	3.088607e+03	-6.112442e+02	-2.379726e+02	-3.039833e+02	-4.189770e+02	-1.002546e+02	-1.529676e+02	-7.051320e+01	-9.201645e+01	-1.459547e+02	-1.238417e+02	-1.674594e+02	-1.365216e+02	-1.801389e+02	-1.634151e+02	-1.986664e+02	-2.203103e+02	-1.954394e+02
8.750000e+02	3.091100e+03	-6.995720e+02	-2.859306e+02	-3.600120e+02	-4.634609e+02	-1.285589e+02	-1.752144e+02	-8.942327e+01	-1.075571e+02	-1.783719e+02	-1.491807e+02	-1.965071e+02	-1.635026e+02	-2.108289e+02	-1.642284e+02	-2.250264e+02	-2.384343e+02	-2.117728e+02
8.760000e+02	3.092170e+03	-7.623661e+02	-3.220096e+02	-4.033217e+02	-4.946010e+02	-1.514462e+02	-1.918332e+02	-1.026728e+02	-1.163242e+02	-2.056837e+02	-1.690554e+02	-2.193364e+02	-1.839832e+02	-2.342643e+02	-1.617122e+02	-2.460700e+02	-2.485310e+02	-2.220975e+02
8.770000e+02	3.090340e+03	-7.982993e+02	-3.451106e+02	-4.331403e+02	-5.116748e+02	-1.681724e+02	-2.029433e+02	-1.093446e+02	-1.184573e+02	-2.266515e+02	-1.833324e+02	-2.357653e+02	-1.973730e+02	-2.498063e+02	-1.559796e+02	-2.614221e+02	-2.502529e+02	-2.269262e+02
8.780000e+02	3.081345e+03	-8.088112e+02	-3.555623e+02	-4.502287e+02	-5.150480e+02	-1.789095e+02	-2.090898e+02	-1.093838e+02	-1.148585e+02	-2.407020e+02	-1.926964e+02	-2.461777e+02	-2.040491e+02	-2.575309e+02	-1.472293e+02	-2.708823e+02	-2.441659e+02	-2.270783e+02
8.790000e+02	3.058808e+03	-7.973143e+02	-3.547634e+02	-4.563002e+02	-5.059160e+02	-1.845139e+02	-2.109256e+02	-1.035157e+02	-1.068886e+02	-2.478729e+02	-1.982637e+02	-2.512468e+02	-2.050516e+02	-2.580353e+02	-1.358146e+02	-2.742847e+02	-2.316314e+02	-2.233743e+02
8.800000e+02	3.015512e+03	-7.680561e+02	-3.446214e+02	-4.532655e+02	-4.859371e+02	-1.861345e+02	-2.089339e+02	-9.301731e+01	-9.598815e+01	-2.486314e+02	-2.011097e+02	-2.516031e+02	-2.016606e+02	-2.521546e+02	-1.223306e+02	-2.714313e+02	-2.145059e+02	-2.163577e+02
8.810000e+02	2.945081e+03	-7.250798e+02	-3.270014e+02	-4.425884e+02	-4.569191e+02	-1.848249e+02	-2.033177e+02	-7.943857e+01	-8.333872e+01	-2.436609e+02	-2.018955e+02	-2.475618e+02	-1.950246e+02	-2.406914e+02	-1.076437e+02	-2.621542e+02	-1.947648e+02	-2.061729e+02
8.820000e+02	2.843800e+03	-6.716857e+02	-3.033992e+02	-4.250069e+02	-4.206973e+02	-1.813105e+02	-1.941004e+02	-6.436401e+01	-6.968020e+01	-2.337174e+02	-2.007311e+02	-2.390342e+02	-1.859705e+02	-2.242740e+02	-9.282459e+01	-2.465079e+02	-1.741894e+02	-1.926753e+02
8.830000e+02	2.712164e+03	-6.105361e+02	-2.749430e+02	-4.007177e+02	-3.792308e+02	-1.759733e+02	-1.813816e+02	-4.925742e+01	-5.533370e+01	-2.196078e+02	-1.973066e+02	-2.256846e+02	-1.750307e+02	-2.034089e+02	-7.900321e+01	-2.250167e+02	-1.542140e+02	-1.757367e+02
8.840000e+02	2.555701e+03	-5.441950e+02	-2.426503e+02	-3.698924e+02	-3.347992e+02	-1.690046e+02	-1.656089e+02	-3.537722e+01	-4.039218e+01	-2.022568e+02	-1.912005e+02	-2.072722e+02	-1.626174e+02	-1.786894e+02	-6.719358e+01	-1.988618e+02	-1.359376e+02	-1.556088e+02
8.850000e+02	2.384658e+03	-4.756574e+02	-2.077336e+02	-3.332275e+02	-2.900969e+02	-1.605944e+02	-1.477160e+02	-2.372155e+01	-2.496643e+01	-1.827660e+02	-1.821987e+02	-1.840113e+02	-1.492134e+02	-1.510260e+02	-5.814192e+01	-1.698883e+02	-1.202090e+02	-1.331575e+02
8.860000e+02	2.212449e+03	-4.084434e+02	-1.717300e+02	-2.922187e+02	-2.480544e+02	-1.510293e+02	-1.290421e+02	-1.497006e+01	-9.359270e+00	-1.623697e+02	-1.704723e+02	-1.567593e+02	-1.354565e+02	-1.217435e+02	-5.222573e+01	-1.403833e+02	-1.076719e+02	-1.098406e+02
8.870000e+02	2.053162e+03	-3.461016e+02	-1.363502e+02	-2.490014e+02	-2.113635e+02	-1.406467e+02	-1.110550e+02	-9.421862e+00	5.909846e+00	-1.422591e+02	-1.565467e+02	-1.269278e+02	-1.220709e+02	-9.245200e+01	-4.940828e+01	-1.126681e+02	-9.869667e+01	-8.741869e+01
8.880000e+02	1.918820e+03	-2.913255e+02	-1.031095e+02	-2.058355e+02	-1.818591e+02	-1.296908e+02	-9.499125e+01	-6.958585e+00	2.022620e+01	-1.233348e+02	-1.411079e+02	-9.615053e+01	-1.096825e+02	-6.472497e+01	-4.924069e+01	-8.863603e+01	-9.322490e+01	-6.752096e+01
8.890000e+02	1.817239e+03	-2.451024e+02	-7.292418e+01	-1.644714e+02	-1.600063e+02	-1.181699e+02	-8.155668e+01	-7.066859e+00	3.307617e+01	-1.059995e+02	-1.247581e+02	-6.585695e+01	-9.861216e+01	-3.971088e+01	-5.090545e+01	-6.938692e+01	-9.062186e+01	-5.124294e+01
8.900000e+02	1.751099e+03	-2.062886e+02	-4.586244e+01	-1.256706e+02	-1.447063e+02	-1.058039e+02	-7.078587e+01	-8.934269e+00	4.422422e+01	-9.008577e+01	-1.078310e+02	-3.692780e+01	-8.874070e+01	-1.783743e+01	-5.330194e+01	-5.506837e+01	-8.964105e+01	-3.892115e+01
8.910000e+02	1.718365e+03	-1.717893e+02	-2.115431e+01	-8.904792e+01	-1.334976e+02	-9.208559e+01	-6.208198e+01	-1.160126e+01	5.379642e+01	-7.494980e+01	-9.032481e+01	-9.552638e+00	-7.949318e+01	1.279079e+00	-5.517775e+01	-4.494677e+01	-8.855444e+01	-3.013501e+01
8.920000e+02	1.713748e+03	-1.372684e+02	2.551382e+00	-5.326591e+01	-1.230813e+02	-7.642391e+01	-5.439204e+01	-1.412997e+01	6.223926e+01	-5.968689e+01	-7.195073e+01	1.668182e+01	-6.994560e+01	1.868702e+01	-5.530365e+01	-3.765552e+01	-8.542988e+01	-2.389230e+01
8.930000e+02	1.730581e+03	-9.817097e+01	2.676904e+01	-1.650755e+01	-1.100184e+02	-5.831683e+01	-4.645124e+01	-1.575048e+01	7.016659e+01	-4.339647e+01	-5.226505e+01	4.252008e+01	-5.902544e+01	3.575973e+01	-5.267483e+01	-3.153131e+01	-7.849151e+01	-1.890962e+01
8.940000e+02	1.762482e+03	-5.082654e+01	5.270797e+01	2.289840e+01	-9.144500e+01	-3.752227e+01	-3.704518e+01	-1.596237e+01	7.814304e+01	-2.543391e+01	-3.085759e+01	6.867099e+01	-4.577044e+01	5.375815e+01	-4.670327e+01	-2.495719e+01	-6.649244e+01	-1.390767e+01
8.950000e+02	1.804406e+03	6.559698e+00	8.085848e+01	6.584214e+01	-6.569498e+01	-1.421912e+01	-2.526065e+01	-1.458799e+01	8.647619e+01	-5.616468e+00	-7.573773e+00	9.544717e+01	-2.960311e+01	7.341785e+01	-3.735308e+01	-1.665835e+01	-4.904132e+01	-7.872949e+00
8.960000e+02	1.852916e+03	7.320907e+01	1.107307e+02	1.119491e+02	-3.274072e+01	1.085687e+01	-1.069725e+01	-1.178170e+01	9.509549e+01	1.563652e+01	1.726710e+01	1.225131e+02	-1.056253e+01	9.468354e+01	-2.517406e+01	-5.917983e+00	-2.682738e+01	-2.563764e-01
8.970000e+02	1.905809e+03	1.455669e+02	1.408348e+02	1.594114e+02	5.642231e+00	3.635338e+01	6.403985e+00	-7.993303e+00	1.035740e+02	3.726210e+01	4.272864e+01	1.488288e+02	1.058339e+01	1.166837e+02	-1.121103e+01	7.312285e+00	-1.674526e+00	8.922724e+00
8.980000e+02	1.961411e+03	2.177739e+02	1.689529e+02	2.052455e+02	4.608368e+01	6.039758e+01	2.516919e+01	-3.876492e+00	1.112955e+02	5.765865e+01	6.727869e+01	1.728300e+02	3.241558e+01	1.379671e+02	3.197186e+00	2.242977e+01	2.364972e+01	1.910436e+01
8.990000e+02	2.017941e+03	2.828450e+02	1.926685e+02	2.459619e+02	8.424267e+01	8.090362e+01	4.426862e+01	-1.391731e-01	1.177013e+02	7.496836e+01	8.903244e+01	1.928082e+02	5.315298e+01	1.569292e+02	1.667960e+01	3.833284e+01	4.590604e+01	2.936402e+01
9.000000e+02	2.073291e+03	3.343258e+02	2.100127e+02	2.784616e+02	1.157609e+02	9.606025e+01	6.223456e+01	2.644071e+00	1.225069e+02	8.750682e+01	1.061872e+02	2.073691e+02	7.109114e+01	1.722736e+02	2.808806e+01	5.368062e+01	6.207702e+01	3.870113e+01
9.010000e+02	2.125317e+03	3.679428e+02	2.200073e+02	3.008520e+02	1.373053e+02	1.048573e+02	7.782440e+01	4.207706e+00	1.257820e+02	9.422610e+01	1.175156e+02	2.157999e+02	8.505020e+01	1.833352e+02	3.668393e+01	6.719282e+01	7.010980e+01	4.634293e+01
9.020000e+02	2.172458e+03	3.826614e+02	2.228975e+02	3.128708e+02	1.473658e+02	1.074441e+02	9.029757e+01	4.695507e+00	1.278526e+02	9.504559e+01	1.227254e+02	2.182022e+02	9.466628e+01	1.901439e+02	4.222195e+01	7.789875e+01	6.946511e+01	5.193922e+01
9.030000e+02	2.214276e+03	3.807348e+02	2.199733e+02	3.157494e+02	1.465199e+02	1.051465e+02	9.949871e+01	4.637818e+00	1.290689e+02	9.090481e+01	1.225267e+02	2.153356e+02	1.004113e+02	1.932210e+02	4.492874e+01	8.525705e+01	6.126166e+01	5.555966e+01
9.040000e+02	2.251494e+03	3.667031e+02	2.130422e+02	3.115778e+02	1.370596e+02	1.000918e+02	1.057193e+02	4.801705e+00	1.295521e+02	8.349029e+01	1.183607e+02	2.082405e+02	1.033346e+02	1.932153e+02	4.539673e+01	8.911821e+01	4.794085e+01	5.749593e+01
9.050000e+02	2.285380e+03	3.457329e+02	2.037628e+02	3.024417e+02	1.221321e+02	9.456050e+01	1.094081e+02	5.960453e+00	1.290407e+02	7.472211e+01	1.118936e+02	1.978023e+02	1.046364e+02	1.905458e+02	4.442335e+01	8.957045e+01	3.256163e+01	5.797256e+01
9.060000e+02	2.316707e+03	3.219495e+02	1.931042e+02	2.896906e+02	1.047399e+02	9.029565e+01	1.108678e+02	8.660940e+00	1.269148e+02	6.618944e+01	1.044782e+02	1.844433e+02	1.052438e+02	1.852095e+02	4.282525e+01	8.676271e+01	1.797764e+01	5.692343e+01
9.070000e+02	2.344852e+03	2.973936e+02	1.811368e+02	2.736244e+02	8.698431e+01	8.801948e+01	1.100789e+02	1.306558e+01	1.223914e+02	5.874544e+01	9.679460e+01	1.680713e+02	1.055490e+02	1.768262e+02	4.125677e+01	8.080625e+01	6.178720e+00	5.396022e+01
9.080000e+02	2.367658e+03	2.719171e+02	1.672099e+02	2.536842e+02	6.979205e+01	8.731488e+01	1.067251e+02	1.891212e+01	1.148127e+02	5.239729e+01	8.878872e+01	1.482980e+02	1.053814e+02	1.648910e+02	4.006492e+01	7.180916e+01	-2.016360e+00	4.855654e+01
9.090000e+02	2.382378e+03	2.439062e+02	1.504050e+02	2.290051e+02	5.312439e+01	8.687578e+01	1.003964e+02	2.558759e+01	1.039095e+02	4.649587e+01	7.989002e+01	1.248179e+02	1.041818e+02	1.491098e+02	3.921452e+01	6.001836e+01	-6.893236e+00	4.035043e+01
9.100000e+02	2.387494e+03	2.113701e+02	1.300384e+02	1.990386e+02	3.644809e+01	8.499217e+01	9.085861e+01	3.227466e+01	8.993400e+01	4.010483e+01	6.936881e+01	9.776428e+01	1.012681e+02	1.296637e+02	3.830855e+01	4.597321e+01	-9.524425e+00	2.939930e+01
9.110000e+02	2.384633e+03	1.728564e+02	1.059894e+02	1.639485e+02	1.917463e+01	8.006877e+01	7.825105e+01	3.811398e+01	7.361755e+01	3.237242e+01	5.665744e+01	6.787608e+01	9.606578e+01	1.072845e+02	3.670589e+01	3.055660e+01	-1.138125e+01	1.624481e+01
9.120000e+02	2.379553e+03	1.278475e+02	7.874360e+01	1.246349e+02	8.665713e-01	7.100426e+01	6.311769e+01	4.233760e+01	5.598117e+01	2.276306e+01	4.151226e+01	3.640671e+01	8.822126e+01	8.311577e+01	3.370843e+01	1.487824e+01	-1.401082e+01	1.751393e+00
9.130000e+02	2.381396e+03	7.664789e+01	4.919716e+01	8.244754e+01	-1.879614e+01	5.735576e+01	4.626615e+01	4.435401e+01	3.809233e+01	1.110542e+01	2.400345e+01	4.843792e+00	7.759673e+01	5.843714e+01	2.876586e+01	1.732970e-02	-1.881237e+01	-1.319185e+01
9.140000e+02	2.400066e+03	2.006636e+01	1.839239e+01	3.881662e+01	-4.012739e+01	3.932356e+01	2.853855e+01	4.379178e+01	2.087343e+01	-2.480563e+00	4.419551e+00	-2.539893e+01	6.420868e+01	3.439028e+01	2.164089e+01	-1.326437e+01	-2.686159e+01	-2.794156e+01
9.150000e+02	2.442467e+03	-4.073252e+01	-1.263330e+01	-4.952574e+00	-6.341635e+01	1.765661e+01	1.061754e+01	4.052162e+01	5.029447e+00	-1.766244e+01	-1.679295e+01	-5.315474e+01	4.819562e+01	1.183391e+01	1.249309e+01	-2.470067e+01	-3.871395e+01	-4.219777e+01
9.160000e+02	2.508995e+03	-1.040161e+02	-4.280206e+01	-4.760501e+01	-8.867566e+01	-6.428774e+00	-7.037172e+00	3.467376e+01	-8.910395e+00	-3.389157e+01	-3.898401e+01	-7.747602e+01	2.986491e+01	-8.627033e+00	1.866835e+00	-3.449949e+01	-5.417427e+01	-5.588265e+01
9.170000e+02	2.591820e+03	-1.670341e+02	-7.082129e+01	-8.766600e+01	-1.152362e+02	-3.129175e+01	-2.410463e+01	2.665201e+01	-2.050576e+01	-5.031565e+01	-6.117559e+01	-9.747390e+01	9.802313e+00	-2.649595e+01	-9.404850e+00	-4.312838e+01	-7.210595e+01	-6.887542e+01
9.180000e+02	2.675903e+03	-2.256997e+02	-9.505359e+01	-1.232085e+02	-1.414184e+02	-5.492212e+01	-4.023523e+01	1.712852e+01	-2.935930e+01	-6.569460e+01	-8.196799e+01	-1.121831e+02	-1.103046e+01	-4.124559e+01	-2.035215e+01	-5.100783e+01	-9.040894e+01	-8.075561e+01
9.190000e+02	2.742697e+03	-2.747828e+02	-1.135991e+02	-1.518903e+02	-1.645329e+02	-7.509039e+01	-5.490598e+01	6.995684e+00	-3.515979e+01	-7.843975e+01	-9.959839e+01	-1.205962e+02	-3.129885e+01	-5.229665e+01	-3.004185e+01	-5.825563e+01	-1.062761e+02	-9.070318e+01
9.200000e+02	2.775338e+03	-3.087698e+02	-1.246399e+02	-1.713450e+02	-1.813385e+02	-8.963774e+01	-6.738697e+01	-2.739629e+00	-3.779377e+01	-8.684676e+01	-1.122033e+02	-1.219020e+02	-4.944733e+01	-5.914614e+01	-3.773889e+01	-6.459633e+01	-1.167415e+02	-9.762635e+01
9.210000e+02	2.763530e+03	-3.231874e+02	-1.269377e+02	-1.798007e+02	-1.888713e+02	-9.686544e+01	-7.684577e+01	-1.111032e+01	-3.745076e+01	-8.948764e+01	-1.182237e+02	-1.158293e+02	-6.397548e+01	-6.158114e+01	-4.302754e+01	-6.946827e+01	-1.194025e+02	-1.004788e+02
9.220000e+02	2.706387e+03	-3.159165e+02	-1.202686e+02	-1.766610e+02	-1.853692e+02	-9.590459e+01	-8.254845e+01	-1.735537e+01	-3.464274e+01	-8.562662e+01	-1.168063e+02	-1.029152e+02	-7.374959e+01	-5.985867e+01	-4.587129e+01	-7.227061e+01	-1.130980e+02	-9.864048e+01
9.230000e+02	2.612365e+03	-2.879793e+02	-1.055972e+02	-1.627887e+02	-1.709450e+02	-8.692849e+01	-8.407557e+01	-2.104820e+01	-3.010611e+01	-7.549182e+01	-1.080420e+02	-8.455094e+01	-7.824134e+01	-5.475031e+01	-4.660435e+01	-7.263880e+01	-9.830502e+01	-9.220826e+01
9.240000e+02	2.496530e+03	-2.434958e+02	-8.491309e+01	-1.403833e+02	-1.477457e+02	-7.112618e+01	-8.147431e+01	-2.214703e+01	-2.462465e+01	-6.028921e+01	-9.296260e+01	-6.276794e+01	-7.761860e+01	-4.742396e+01	-4.586142e+01	-7.063702e+01	-7.710663e+01	-8.208163e+01
9.250000e+02	2.376358e+03	-1.888474e+02	-6.081454e+01	-1.125312e+02	-1.195353e+02	-5.045416e+01	-7.529999e+01	-2.095750e+01	-1.885924e+01	-4.195601e+01	-7.331665e+01	-3.985873e+01	-7.267536e+01	-3.921736e+01	-4.446218e+01	-6.680131e+01	-5.273089e+01	-6.981145e+01
9.260000e+02	2.267537e+03	-1.313674e+02	-3.601579e+01	-8.262626e+01	-9.084161e+01	-2.726237e+01	-6.653736e+01	-1.802968e+01	-1.326551e+01	-2.275090e+01	-5.123080e+01	-1.798760e+01	-6.464111e+01	-3.139772e+01	-4.326687e+01	-6.202524e+01	-2.881214e+01	-5.726515e+01
9.270000e+02	2.180937e+03	-7.796374e+01	-1.294208e+01	-5.384274e+01	-6.593338e+01	-3.906474e+00	-5.641583e+01	-1.402615e+01	-8.126725e+00	-4.815846e+00	-2.886279e+01	1.082803e+00	-5.492759e+01	-2.498168e+01	-4.301412e+01	-5.732452e+01	-8.603712e+00	-4.621295e+01
9.280000e+02	2.121233e+03	-3.397173e+01	6.528681e+00	-2.873903e+01	-4.789847e+01	1.758363e+01	-4.614459e+01	-9.589284e+00	-3.660441e+00	1.018878e+01	-8.106415e+00	1.611689e+01	-4.485762e+01	-2.063387e+01	-4.415406e+01	-5.353885e+01	5.646090e+00	-3.794427e+01
9.290000e+02	2.087069e+03	-2.360013e+00	2.121996e+01	-8.967791e+00	-3.801204e+01	3.576359e+01	-3.661056e+01	-5.217848e+00	-1.156642e-01	2.133544e+01	9.645208e+00	2.643690e+01	-3.540613e+01	-1.861386e+01	-4.670351e+01	-5.103831e+01	1.303213e+01	-3.299375e+01
9.300000e+02	2.072338e+03	1.668861e+01	3.077714e+01	4.943745e+00	-3.549094e+01	4.996187e+01	-2.811239e+01	-1.156668e+00	2.213194e+00	2.856393e+01	2.367983e+01	3.193303e+01	-2.699055e+01	-1.873667e+01	-5.017110e+01	-4.951020e+01	1.402490e+01	-3.102136e+01
9.310000e+02	2.068131e+03	2.577448e+01	3.576101e+01	1.370454e+01	-3.766676e+01	6.036183e+01	-2.023249e+01	2.682478e+00	3.074725e+00	3.268645e+01	3.405331e+01	3.307788e+01	-1.937451e+01	-2.034916e+01	-5.360589e+01	-4.790805e+01	1.024642e+01	-3.086689e+01
9.320000e+02	2.064974e+03	2.974228e+01	3.762602e+01	1.913872e+01	-4.057359e+01	6.790738e+01	-1.194439e+01	6.728311e+00	2.403790e+00	3.522255e+01	4.151000e+01	3.089716e+01	-1.175955e+01	-2.237157e+01	-5.579792e+01	-4.462970e+01	4.060550e+00	-3.078595e+01
9.330000e+02	2.054985e+03	3.451777e+01	3.845912e+01	2.371580e+01	-3.989475e+01	7.397597e+01	-1.988137e+00	1.164228e+01	4.319500e-01	3.802764e+01	4.718210e+01	2.681640e+01	-3.101667e+00	-2.346652e+01	-5.560251e+01	-3.793724e+01	-1.953841e+00	-2.885283e+01
9.340000e+02	2.033558e+03	4.542587e+01	4.043112e+01	2.974852e+01	-3.211792e+01	7.985268e+01	1.056646e+01	1.808587e+01	-2.313307e+00	4.274503e+01	5.210568e+01	2.234491e+01	7.402597e+00	-2.235736e+01	-5.229902e+01	-2.654219e+01	-5.572804e+00	-2.347234e+01
9.350000e+02	2.000195e+03	6.538992e+01	4.507140e+01	3.847444e+01	-1.563240e+01	8.616266e+01	2.575992e+01	2.641530e+01	-5.144549e+00	5.021666e+01	5.671204e+01	1.865590e+01	1.981762e+01	-1.823781e+01	-4.586210e+01	-1.018725e+01	-5.442929e+00	-1.388626e+01
9.360000e+02	1.958271e+03	9.362596e+01	5.262475e+01	4.937959e+01	8.565630e+00	9.249495e+01	4.242089e+01	3.641151e+01	-7.438647e+00	6.006420e+01	6.051938e+01	1.621320e+01	3.316556e+01	-1.114008e+01	-3.704380e+01	9.988833e+00	-1.421626e+00	-5.209931e-01
9.370000e+02	1.913760e+03	1.254085e+02	6.178346e+01	6.009927e+01	3.684562e+01	9.741155e+01	5.825372e+01	4.716609e+01	-8.852537e+00	7.063685e+01	6.220196e+01	1.461750e+01	4.548101e+01	-2.103143e+00	-2.722994e+01	3.147762e+01	5.368969e+00	1.496391e+01
9.380000e+02	1.873303e+03	1.531492e+02	6.996846e+01	6.702540e+01	6.369438e+01	9.888360e+01	7.035495e+01	5.719729e+01	-9.432406e+00	7.940173e+01	6.005732e+01	1.277147e+01	5.425321e+01	6.967371e+00	-1.811587e+01	5.087162e+01	1.282311e+01	2.998852e+01
9.390000e+02	1.842188e+03	1.685253e+02	7.410704e+01	6.644881e+01	8.308501e+01	9.500451e+01	7.600137e+01	6.478317e+01	-9.567589e+00	8.367548e+01	5.270093e+01	9.324339e+00	5.712373e+01	1.374683e+01	-1.130649e+01	6.467085e+01	1.841386e+01	4.166662e+01
9.400000e+02	1.822894e+03	1.649522e+02	7.163300e+01	5.581738e+01	9.006591e+01	8.469900e+01	7.343394e+01	6.841169e+01	-9.815735e+00	8.144953e+01	3.969608e+01	3.221933e+00	5.259467e+01	1.611987e+01	-7.961895e+00	7.018296e+01	1.988199e+01	4.754521e+01
9.410000e+02	1.814667e+03	1.395350e+02	6.132989e+01	3.462408e+01	8.207228e+01	6.814739e+01	6.235816e+01	6.719907e+01	-1.068715e+01	7.201776e+01	2.184432e+01	-5.868440e+00	4.049172e+01	1.277799e+01	-8.583141e+00	6.622704e+01	1.584365e+01	4.623735e+01
9.420000e+02	1.814247e+03	9.382837e+01	4.370112e+01	4.586928e+00	5.954533e+01	4.677210e+01	4.399256e+01	6.113747e+01	-1.249105e+01	5.619281e+01	1.011819e+00	-1.743555e+01	2.202170e+01	3.573108e+00	-1.298107e+01	5.341183e+01	6.131391e+00	3.774702e+01
9.430000e+02	1.817411e+03	3.319021e+01	2.074611e+01	-3.092643e+01	2.567827e+01	2.281890e+01	2.066952e+01	5.109189e+01	-1.530844e+01	3.605513e+01	-2.042745e+01	-3.034498e+01	-5.820886e-01	-1.050100e+01	-2.041649e+01	3.390439e+01	-8.228576e+00	2.339092e+01
9.440000e+02	1.820686e+03	-3.497518e+01	-4.746348e+00	-6.798596e+01	-1.460358e+01	-1.284389e+00	-4.850215e+00	3.855004e+01	-1.908822e+01	1.434242e+01	-4.029689e+01	-4.329564e+01	-2.469066e+01	-2.769085e+01	-2.985715e+01	1.077534e+01	-2.538152e+01	5.357526e+00
9.450000e+02	1.822512e+03	-1.034437e+02	-3.011135e+01	-1.032899e+02	-5.608575e+01	-2.355547e+01	-3.010937e+01	2.520708e+01	-2.380299e+01	-6.307800e+00	-5.720237e+01	-5.531779e+01	-4.797197e+01	-4.608877e+01	-4.027003e+01	-1.286283e+01	-4.322550e+01	-1.394413e+01
9.460000e+02	1.823398e+03	-1.671318e+02	-5.360668e+01	-1.350583e+02	-9.467502e+01	-4.287994e+01	-5.350585e+01	1.251830e+01	-2.957694e+01	-2.402913e+01	-7.081322e+01	-6.612449e+01	-6.893309e+01	-6.424556e+01	-5.085855e+01	-3.465603e+01	-6.002146e+01	-3.253953e+01
9.470000e+02	1.825091e+03	-2.241985e+02	-7.484299e+01	-1.633687e+02	-1.283475e+02	-5.913429e+01	-7.451925e+01	1.363248e+00	-3.671614e+01	-3.812617e+01	-8.179289e+01	-7.620592e+01	-8.716124e+01	-8.157522e+01	-6.116680e+01	-5.351199e+01	-7.483798e+01	-4.935069e+01
9.480000e+02	1.829216e+03	-2.759761e+02	-9.472207e+01	-1.898594e+02	-1.573488e+02	-7.301002e+01	-9.357103e+01	-8.068789e+00	-4.561594e+01	-4.910535e+01	-9.144830e+01	-8.665315e+01	-1.032039e+02	-9.840940e+01	-7.101296e+01	-6.966709e+01	-8.768420e+01	-6.432930e+01
9.490000e+02	1.836075e+03	-3.257650e+02	-1.149100e+02	-2.169033e+02	-1.835855e+02	-8.560680e+01	-1.115757e+02	-1.613603e+01	-5.657060e+01	-5.833857e+01	-1.012220e+02	-9.877406e+01	-1.181261e+02	-1.156784e+02	-8.027862e+01	-8.430813e+01	-9.928013e+01	-7.822157e+01
9.500000e+02	1.844165e+03	-3.768753e+02	-1.370113e+02	-2.464914e+02	-2.094145e+02	-9.790865e+01	-1.293242e+02	-2.340269e+01	-6.954915e+01	-6.746124e+01	-1.121605e+02	-1.136088e+02	-1.328786e+02	-1.343269e+02	-8.865014e+01	-9.887729e+01	-1.105404e+02	-9.204100e+01
9.510000e+02	1.850580e+03	-4.305790e+02	-1.617135e+02	-2.791668e+02	-2.362623e+02	-1.102918e+02	-1.468988e+02	-3.023968e+01	-8.402122e+01	-7.769137e+01	-1.244866e+02	-1.314742e+02	-1.476879e+02	-1.546751e+02	-9.544686e+01	-1.142988e+02	-1.219673e+02	-1.064334e+02
9.520000e+02	1.852055e+03	-4.847422e+02	-1.882052e+02	-3.133692e+02	-2.636042e+02	-1.222257e+02	-1.633339e+02	-3.653861e+01	-9.890818e+01	-8.929605e+01	-1.373923e+02	-1.516671e+02	-1.616969e+02	-1.759708e+02	-9.964743e+01	-1.304047e+02	-1.332039e+02	-1.211746e+02
9.530000e+02	1.846069e+03	-5.337017e+02	-2.140908e+02	-3.454479e+02	-2.887134e+02	-1.322863e+02	-1.766659e+02	-4.166464e+01	-1.126977e+02	-1.013922e+02	-1.491291e+02	-1.724268e+02	-1.730154e+02	-1.963119e+02	-1.001387e+02	-1.457721e+02	-1.429462e+02	-1.350046e+02
9.540000e+02	1.831461e+03	-5.694789e+02	-2.358486e+02	-3.703724e+02	-3.072774e+02	-1.384964e+02	-1.843778e+02	-4.466514e+01	-1.237008e+02	-1.121469e+02	-1.573888e+02	-1.911841e+02	-1.791821e+02	-2.129759e+02	-9.609792e+01	-1.580284e+02	-1.492545e+02	-1.458672e+02
9.550000e+02	1.808293e+03	-5.838572e+02	-2.496591e+02	-3.828984e+02	-3.146064e+02	-1.388703e+02	-1.840750e+02	-4.463109e+01	-1.303762e+02	-1.192820e+02	-1.598571e+02	-2.050287e+02	-1.778632e+02	-2.230331e+02	-8.734152e+01	-1.644869e+02	-1.501255e+02	-1.514522e+02
9.560000e+02	1.777167e+03	-5.705055e+02	-2.523018e+02	-3.787780e+02	-3.069235e+02	-1.319545e+02	-1.741343e+02	-4.104118e+01	-1.316232e+02	-1.206777e+02	-1.547505e+02	-2.112612e+02	-1.675100e+02	-2.240190e+02	-7.447669e+01	-1.628576e+02	-1.440724e+02	-1.498101e+02
9.570000e+02	1.738517e+03	-5.264085e+02	-2.418274e+02	-3.556326e+02	-2.822624e+02	-1.171723e+02	-1.540963e+02	-3.394100e+01	-1.269694e+02	-1.148570e+02	-1.411655e+02	-2.078869e+02	-1.477388e+02	-2.144584e+02	-5.878237e+01	-1.517811e+02	-1.304881e+02	-1.398116e+02
9.580000e+02	1.692464e+03	-4.522962e+02	-2.178708e+02	-3.133212e+02	-2.407649e+02	-9.489211e+01	-1.247181e+02	-2.390610e+01	-1.166344e+02	-1.012355e+02	-1.191732e+02	-1.939652e+02	-1.193491e+02	-1.941393e+02	-4.186880e+01	-1.310615e+02	-1.097105e+02	-1.213347e+02
9.590000e+02	1.639411e+03	-3.522747e+02	-1.816470e+02	-2.538793e+02	-1.844868e+02	-6.628410e+01	-8.776577e+01	-1.184847e+01	-1.014984e+02	-8.014757e+01	-8.971953e+01	-1.697990e+02	-8.407366e+01	-1.641513e+02	-2.525779e+01	-1.016294e+02	-8.286480e+01	-9.521549e+01
9.600000e+02	1.581030e+03	-2.331143e+02	-1.357649e+02	-1.812274e+02	-1.169939e+02	-3.309807e+01	-4.571209e+01	1.213566e+00	-8.301633e+01	-5.274765e+01	-5.445441e+01	-1.369789e+02	-4.424209e+01	-1.267649e+02	-1.004215e+01	-6.536184e+01	-5.163943e+01	-6.308595e+01
9.610000e+02	1.520924e+03	-1.035409e+02	-8.396392e+01	-1.007906e+02	-4.297259e+01	2.527882e+00	-1.468578e+00	1.431805e+01	-6.308964e+01	-2.087338e+01	-1.558047e+01	-9.828237e+01	-2.502326e+00	-8.520269e+01	3.274540e+00	-2.487009e+01	-1.810959e+01	-2.720847e+01
9.620000e+02	1.464320e+03	2.644382e+01	-3.077074e+01	-1.902428e+01	3.211471e+01	3.821200e+01	4.182633e+01	2.662081e+01	-4.387567e+01	1.310571e+01	2.427891e+01	-5.739196e+01	3.837294e+01	-4.329659e+01	1.474465e+01	1.671970e+01	1.538831e+01	9.676844e+00
9.630000e+02	1.416688e+03	1.464264e+02	1.898441e+01	5.725113e+01	1.024562e+02	7.148583e+01	8.103270e+01	3.739255e+01	-2.750777e+01	4.649281e+01	6.226069e+01	-1.840858e+01	7.566415e+01	-5.003984e+00	2.480538e+01	5.603922e+01	4.641073e+01	4.455525e+01
9.640000e+02	1.381885e+03	2.467924e+02	6.081401e+01	1.217407e+02	1.625213e+02	1.000228e+02	1.133188e+02	4.601475e+01	-1.574329e+01	7.655777e+01	9.555202e+01	1.479884e+01	1.069454e+02	2.619311e+01	3.404798e+01	8.985313e+01	7.266235e+01	7.445836e+01
9.650000e+02	1.360797e+03	3.201427e+02	9.127383e+01	1.696457e+02	2.078459e+02	1.219260e+02	1.365407e+02	5.201030e+01	-9.619875e+00	1.008940e+02	1.217653e+02	3.926314e+01	1.303850e+02	4.788344e+01	4.298748e+01	1.155081e+02	9.233212e+01	9.688968e+01
9.660000e+02	1.351268e+03	3.624415e+02	1.084914e+02	1.983998e+02	2.357209e+02	1.359747e+02	1.495724e+02	5.509132e+01	-9.243987e+00	1.177356e+02	1.392807e+02	5.339979e+01	1.450015e+02	5.912090e+01	5.186425e+01	1.313325e+02	1.043827e+02	1.102336e+02
9.670000e+02	1.349443e+03	3.733289e+02	1.122845e+02	2.078425e+02	2.454565e+02	1.417017e+02	1.524203e+02	5.516899e+01	-1.381837e+01	1.261030e+02	1.474027e+02	5.711539e+01	1.507277e+02	6.044047e+01	6.049379e+01	1.368208e+02	1.086296e+02	1.139718e+02
9.680000e+02	1.351877e+03	3.553032e+02	1.037661e+02	1.996819e+02	2.380231e+02	1.392265e+02	1.460209e+02	5.227984e+01	-2.193468e+01	1.257009e+02	1.462395e+02	5.148632e+01	1.481955e+02	5.344205e+01	6.819016e+01	1.324944e+02	1.055217e+02	1.085803e+02
9.690000e+02	1.357347e+03	3.120079e+02	8.456447e+01	1.764205e+02	2.151631e+02	1.289021e+02	1.317611e+02	4.643719e+01	-3.204498e+01	1.166096e+02	1.363467e+02	3.812755e+01	1.382923e+02	4.007277e+01	7.380380e+01	1.194677e+02	9.568746e+01	9.512000e+01
9.700000e+02	1.367450e+03	2.463908e+02	5.600642e+01	1.402108e+02	1.783816e+02	1.109575e+02	1.109238e+02	3.748532e+01	-4.293553e+01	9.894213e+01	1.183146e+02	1.852160e+01	1.216885e+02	2.189476e+01	7.591297e+01	9.890774e+01	7.946477e+01	7.470100e+01
9.710000e+02	1.385682e+03	1.597174e+02	1.869208e+01	9.222005e+01	1.283659e+02	8.537135e+01	8.433711e+01	2.507175e+01	-5.400694e+01	7.269924e+01	9.254862e+01	-6.378975e+00	9.859838e+01	-3.300868e-01	7.317019e+01	7.166444e+01	5.669125e+01	4.809799e+01
9.720000e+02	1.415451e+03	5.214878e+01	-2.724005e+01	3.290619e+01	6.525618e+01	5.213916e+01	5.244548e+01	8.824366e+00	-6.523378e+01	3.799397e+01	5.942212e+01	-3.606356e+01	6.896934e+01	-2.651735e+01	6.473742e+01	3.829993e+01	2.694508e+01	1.575652e+01
9.730000e+02	1.457959e+03	-7.513205e+01	-8.117710e+01	-3.680716e+01	-1.020872e+01	1.190410e+01	1.582717e+01	-1.127624e+01	-7.681500e+01	-4.361877e+00	1.980685e+01	-6.989991e+01	3.309260e+01	-5.661526e+01	5.067655e+01	-4.389927e-01	-9.781661e+00	-2.175170e+01
9.740000e+02	1.510940e+03	-2.171306e+02	-1.408217e+02	-1.139692e+02	-9.514157e+01	-3.330174e+01	-2.406835e+01	-3.446267e+01	-8.867543e+01	-5.214609e+01	-2.424831e+01	-1.063580e+02	-7.611059e+00	-8.972197e+01	3.213691e+01	-4.291273e+01	-5.224120e+01	-6.301551e+01
9.750000e+02	1.568879e+03	-3.630435e+02	-2.013462e+02	-1.924834e+02	-1.833625e+02	-7.960281e+01	-6.436113e+01	-5.890092e+01	-1.000671e+02	-1.012791e+02	-6.906933e+01	-1.424444e+02	-5.003877e+01	-1.234151e+02	1.122974e+01	-8.603735e+01	-9.733756e+01	-1.051963e+02
9.760000e+02	1.624703e+03	-4.964054e+02	-2.554975e+02	-2.631976e+02	-2.654359e+02	-1.214664e+02	-1.007451e+02	-8.176360e+01	-1.094928e+02	-1.460048e+02	-1.094946e+02	-1.737331e+02	-8.946424e+01	-1.537041e+02	-9.409016e+00	-1.252834e+02	-1.401646e+02	-1.439634e+02
9.770000e+02	1.672324e+03	-5.978976e+02	-2.948653e+02	-3.154877e+02	-3.302090e+02	-1.526444e+02	-1.282169e+02	-9.972595e+01	-1.150346e+02	-1.798308e+02	-1.397276e+02	-1.951387e+02	-1.203489e+02	-1.757613e+02	-2.723583e+01	-1.554031e+02	-1.748173e+02	-1.741506e+02
9.780000e+02	1.709044e+03	-6.501196e+02	-3.119943e+02	-3.399295e+02	-3.674892e+02	-1.676465e+02	-1.423490e+02	-1.097670e+02	-1.149750e+02	-1.970195e+02	-1.547052e+02	-2.022268e+02	-1.377028e+02	-1.852257e+02	-4.038343e+01	-1.717219e+02	-1.957777e+02	-1.909998e+02
9.790000e+02	1.736795e+03	-6.426374e+02	-3.025921e+02	-3.310980e+02	-3.709240e+02	-1.632513e+02	-1.406455e+02	-1.100072e+02	-1.084537e+02	-1.941385e+02	-1.515103e+02	-1.925846e+02	-1.385137e+02	-1.795892e+02	-4.800991e+01	-1.715326e+02	-1.994005e+02	-1.915561e+02
9.800000e+02	1.761580e+03	-5.753842e+02	-2.669880e+02	-2.894106e+02	-3.399909e+02	-1.395054e+02	-1.234398e+02	-1.002775e+02	-9.587988e+01	-1.711081e+02	-1.302991e+02	-1.667104e+02	-1.227008e+02	-1.591131e+02	-5.031415e+01	-1.550425e+02	-1.849560e+02	-1.756708e+02
9.810000e+02	1.791197e+03	-4.591213e+02	-2.102904e+02	-2.213050e+02	-2.803384e+02	-9.984240e+01	-9.396952e+01	-8.221501e+01	-7.893272e+01	-1.313575e+02	-9.438713e+01	-1.280756e+02	-9.323032e+01	-1.269195e+02	-4.826024e+01	-1.254846e+02	-1.548597e+02	-1.462073e+02
9.820000e+02	1.832050e+03	-3.128308e+02	-1.411989e+02	-1.376994e+02	-2.023734e+02	-5.028670e+01	-5.759053e+01	-5.886231e+01	-6.016321e+01	-8.103522e+01	-4.946371e+01	-8.233693e+01	-5.536360e+01	-8.823728e+01	-4.316278e+01	-8.833902e+01	-1.140383e+02	-1.083610e+02
9.830000e+02	1.886334e+03	-1.590185e+02	-6.991379e+01	-5.130898e+01	-1.186266e+02	1.975570e+00	-2.041113e+01	-3.392272e+01	-4.236029e+01	-2.755271e+01	-2.216077e+00	-3.599153e+01	-1.531882e+01	-4.909437e+01	-3.631301e+01	-4.993932e+01	-6.868918e+01	-6.833581e+01
9.840000e+02	1.950778e+03	-1.850210e+01	-5.833438e+00	2.629322e+01	-4.079106e+01	5.019614e+01	1.219750e+01	-1.092094e+01	-2.790053e+01	2.206817e+01	4.118875e+01	5.086954e+00	2.120468e+01	-1.489689e+01	-2.876957e+01	-1.593028e+01	-2.486057e+01	-3.182820e+01
9.850000e+02	2.017496e+03	9.379608e+01	4.430040e+01	8.702206e+01	2.268729e+01	8.937623e+01	3.676864e+01	7.487703e+00	-1.826146e+01	6.256319e+01	7.632484e+01	3.681213e+01	5.020815e+01	1.069591e+01	-2.133690e+01	9.955916e+00	1.273363e+01	-2.787009e+00
9.860000e+02	2.076627e+03	1.710527e+02	7.737963e+01	1.274792e+02	6.787703e+01	1.169752e+02	5.228935e+01	1.989848e+01	-1.379430e+01	9.117542e+01	1.011380e+02	5.748062e+01	6.999668e+01	2.633992e+01	-1.466380e+01	2.649003e+01	4.139111e+01	1.722015e+01
9.870000e+02	2.119676e+03	2.144438e+02	9.389890e+01	1.488358e+02	9.530831e+01	1.329125e+02	6.004377e+01	2.618143e+01	-1.377261e+01	1.076731e+02	1.158963e+02	6.771702e+01	8.111677e+01	3.293802e+01	-9.353694e+00	3.480493e+01	6.050902e+01	2.892487e+01
9.880000e+02	2.142247e+03	2.310885e+02	9.706318e+01	1.555870e+02	1.088047e+02	1.389673e+02	6.286105e+01	2.720485e+01	-1.667989e+01	1.137446e+02	1.225677e+02	6.985799e+01	8.572688e+01	3.301753e+01	-5.996242e+00	3.763909e+01	7.117236e+01	3.467073e+01
9.890000e+02	2.145188e+03	2.308526e+02	9.138562e+01	1.536396e+02	1.136792e+02	1.378367e+02	6.402904e+01	2.438631e+01	-2.066027e+01	1.120473e+02	1.238747e+02	6.699909e+01	8.663831e+01	2.976273e+01	-5.087097e+00	3.824051e+01	7.544611e+01	3.739472e+01
9.900000e+02	2.133867e+03	2.230548e+02	8.123295e+01	1.483445e+02	1.148951e+02	1.321829e+02	6.621270e+01	1.922725e+01	-2.402089e+01	1.052551e+02	1.223466e+02	6.200560e+01	8.633668e+01	2.599539e+01	-6.867316e+00	3.928579e+01	7.561711e+01	3.962181e+01
9.910000e+02	2.116012e+03	2.140484e+02	6.975276e+01	1.430665e+02	1.157390e+02	1.239627e+02	7.070060e+01	1.296794e+01	-2.565173e+01	9.540553e+01	1.196544e+02	5.678483e+01	8.627955e+01	2.340939e+01	-1.115759e+01	4.214434e+01	7.360250e+01	4.278088e+01
9.920000e+02	2.099007e+03	2.062871e+02	5.845487e+01	1.386785e+02	1.173313e+02	1.141983e+02	7.718799e+01	6.438887e+00	-2.524164e+01	8.369738e+01	1.163932e+02	5.201611e+01	8.666056e+01	2.228252e+01	-1.727119e+01	4.668799e+01	7.065097e+01	4.701595e+01
9.930000e+02	2.087591e+03	1.989152e+02	4.746152e+01	1.340187e+02	1.189817e+02	1.031664e+02	8.411680e+01	1.026325e-01	-2.323305e+01	7.069529e+01	1.122993e+02	4.735911e+01	8.665829e+01	2.171693e+01	-2.406481e+01	5.164646e+01	6.734256e+01	5.147810e+01
9.940000e+02	2.082628e+03	1.893630e+02	3.618658e+01	1.269909e+02	1.190882e+02	9.082541e+01	8.939613e+01	-5.792229e+00	-2.055189e+01	5.673909e+01	1.067284e+02	4.197912e+01	8.501121e+01	2.026061e+01	-3.014010e+01	5.531040e+01	6.378482e+01	5.491023e+01
9.950000e+02	2.081173e+03	1.751172e+02	2.406765e+01	1.157731e+02	1.161154e+02	7.723153e+01	9.120010e+01	-1.105458e+01	-1.823210e+01	4.230035e+01	9.914775e+01	3.512261e+01	8.065090e+01	1.662447e+01	-3.415631e+01	5.626922e+01	5.985269e+01	5.624798e+01
9.960000e+02	2.077626e+03	1.549003e+02	1.101680e+01	9.962879e+01	1.092296e+02	6.274875e+01	8.854027e+01	-1.547954e+01	-1.708141e+01	2.809884e+01	8.942984e+01	2.649678e+01	7.313348e+01	1.019921e+01	-3.516992e+01	5.389033e+01	5.534522e+01	5.499295e+01
9.970000e+02	2.065481e+03	1.289029e+02	-2.551590e+00	7.906289e+01	9.840448e+01	4.799072e+01	8.143742e+01	-1.888674e+01	-1.749615e+01	1.494528e+01	7.786579e+01	1.633563e+01	6.272979e+01	1.198570e+00	-3.289451e+01	4.839157e+01	5.001807e+01	5.125083e+01
9.980000e+02	2.039104e+03	9.824155e+01	-1.601860e+01	5.541032e+01	8.410206e+01	3.358627e+01	7.071189e+01	-2.122144e+01	-1.945079e+01	3.433056e+00	6.496785e+01	5.203365e+00	5.021038e+01	-9.554976e+00	-2.778392e+01	4.055791e+01	4.354843e+01	4.549968e+01
9.990000e+02	1.995079e+03	6.419449e+01	-2.892632e+01	3.020504e+01	6.685022e+01	1.994909e+01	5.757742e+01	-2.263128e+01	-2.260850e+01	-6.316814e+00	5.123283e+01	-6.294474e+00	3.650354e+01	-2.102442e+01	-2.089147e+01	3.131047e+01	3.554313e+01	3.827676e+01
1.000000e+03	1.932851e+03	2.780359e+01	-4.114883e+01	4.732238e+00	4.704594e+01	7.215887e+00	4.327751e+01	-2.344362e+01	-2.646124e+01	-1.468645e+01	3.703579e+01	-1.770459e+01	2.244110e+01	-3.229974e+01	-1.353808e+01	2.137394e+01	2.567452e+01	2.998427e+01
1.001000e+03	1.854663e+03	-9.891898e+00	-5.275135e+01	-2.000719e+01	2.512852e+01	-4.596199e+00	2.892392e+01	-2.402838e+01	-3.042640e+01	-2.232373e+01	2.272274e+01	-2.872229e+01	8.719257e+00	-4.272606e+01	-6.904047e+00	1.119510e+01	1.393528e+01	2.091299e+01
1.002000e+03	1.764915e+03	-4.719921e+01	-6.363007e+01	-4.298374e+01	1.990837e+00	-1.530832e+01	1.553663e+01	-2.460507e+01	-3.388317e+01	-2.974562e+01	8.828107e+00	-3.902424e+01	-3.955732e+00	-5.180822e+01	-1.702452e+00	1.098084e+00	8.942329e-01	1.142991e+01
1.003000e+03	1.669224e+03	-8.124682e+01	-7.317699e+01	-6.278119e+01	-2.069578e+01	-2.436337e+01	4.144807e+00	-2.509763e+01	-3.618869e+01	-3.698704e+01	-3.756026e+00	-4.807852e+01	-1.469947e+01	-5.902199e+01	1.934964e+00	-8.479964e+00	-1.221438e+01	2.164648e+00
1.004000e+03	1.573431e+03	-1.081275e+02	-8.021910e+01	-7.753692e+01	-4.055148e+01	-3.084314e+01	-4.223449e+00	-2.512752e+01	-3.673392e+01	-4.348399e+01	-1.382304e+01	-5.509068e+01	-2.244368e+01	-6.371126e+01	4.321743e+00	-1.686522e+01	-2.368455e+01	-5.972334e+00
1.005000e+03	1.482759e+03	-1.238657e+02	-8.333021e+01	-8.533765e+01	-5.503825e+01	-3.375928e+01	-8.740487e+00	-2.416753e+01	-3.506981e+01	-4.825932e+01	-2.015244e+01	-5.916177e+01	-2.617392e+01	-6.518311e+01	5.909869e+00	-2.324124e+01	-3.179477e+01	-1.199704e+01
1.006000e+03	1.401231e+03	-1.258430e+02	-8.139355e+01	-8.492653e+01	-6.227879e+01	-3.249341e+01	-9.090778e+00	-2.179316e+01	-3.107344e+01	-5.031916e+01	-2.195200e+01	-5.959949e+01	-2.532559e+01	-6.297289e+01	6.971229e+00	-2.691708e+01	-3.535883e+01	-1.519199e+01
1.007000e+03	1.331397e+03	-1.139707e+02	-7.413237e+01	-7.634891e+01	-6.174363e+01	-2.715815e+01	-5.707019e+00	-1.791252e+01	-2.507291e+01	-4.905865e+01	-1.921974e+01	-5.621900e+01	-2.012883e+01	-5.712786e+01	7.425855e+00	-2.760794e+01	-3.413216e+01	-1.539113e+01
1.008000e+03	1.274348e+03	-9.096255e+01	-6.232371e+01	-6.115357e+01	-5.444646e+01	-1.867619e+01	2.471888e-01	-1.286229e+01	-1.784528e+01	-4.447776e+01	-1.282412e+01	-4.946066e+01	-1.169209e+01	-4.832837e+01	6.895110e+00	-2.555474e+01	-2.888764e+01	-1.304262e+01
1.009000e+03	1.229972e+03	-6.150013e+01	-4.757201e+01	-4.198841e+01	-4.253727e+01	-8.517318e+00	7.196638e+00	-7.323748e+00	-1.045222e+01	-3.711925e+01	-4.239300e+00	-4.024758e+01	-1.740139e+00	-3.774816e+01	4.941948e+00	-2.140561e+01	-2.112723e+01	-9.007121e+00
1.010000e+03	1.197387e+03	-3.066409e+01	-3.175378e+01	-2.175630e+01	-2.849881e+01	1.785003e+00	1.365268e+01	-2.101853e+00	-3.958009e+00	-2.779534e+01	4.946106e+00	-2.965132e+01	7.895669e+00	-2.670151e+01	1.369000e+00	-1.592797e+01	-1.256630e+01	-4.201753e+00
1.011000e+03	1.175421e+03	-2.384622e+00	-1.641837e+01	-2.739581e+00	-1.435420e+01	1.109936e+01	1.865652e+01	2.125075e+00	8.618302e-01	-1.727985e+01	1.350866e+01	-1.854287e+01	1.580396e+01	-1.624737e+01	-3.577981e+00	-9.723006e+00	-4.626794e+00	7.113518e-01
1.012000e+03	1.163035e+03	2.135958e+01	-2.444140e+00	1.388154e+01	-1.270444e+00	1.891937e+01	2.195204e+01	4.971432e+00	3.702013e+00	-6.145880e+00	2.082935e+01	-7.414999e+00	2.129728e+01	-6.946934e+00	-9.202377e+00	-3.113539e+00	1.847080e+00	5.420143e+00
1.013000e+03	1.159569e+03	4.028674e+01	9.903682e+00	2.791168e+01	1.029235e+01	2.525560e+01	2.381293e+01	6.366067e+00	4.730273e+00	5.173630e+00	2.679864e+01	3.538212e+00	2.437429e+01	1.113924e+00	-1.454991e+01	3.730639e+00	6.565051e+00	9.798775e+00
1.014000e+03	1.164766e+03	5.477771e+01	2.060081e+01	3.955247e+01	2.005073e+01	3.029098e+01	2.463433e+01	6.451314e+00	4.427862e+00	1.617314e+01	3.147809e+01	1.415012e+01	2.540328e+01	8.075313e+00	-1.871611e+01	1.051616e+01	9.537089e+00	1.360002e+01
1.015000e+03	1.178538e+03	6.475324e+01	2.944216e+01	4.872927e+01	2.736659e+01	3.402098e+01	2.452526e+01	5.443925e+00	3.358032e+00	2.608432e+01	3.473983e+01	2.399890e+01	2.473143e+01	1.399044e+01	-2.113598e+01	1.658828e+01	1.077990e+01	1.621394e+01
1.016000e+03	1.200511e+03	6.915955e+01	3.585027e+01	5.474369e+01	3.108224e+01	3.609526e+01	2.313116e+01	3.549752e+00	1.974941e+00	3.387553e+01	3.610547e+01	3.230116e+01	2.244374e+01	1.863936e+01	-2.174288e+01	2.091112e+01	1.017171e+01	1.667343e+01
1.017000e+03	1.229423e+03	6.634189e+01	3.903139e+01	5.644128e+01	2.984747e+01	3.594291e+01	1.977478e+01	9.718488e-01	5.448258e-01	3.848680e+01	3.487372e+01	3.806014e+01	1.838257e+01	2.156893e+01	-2.095165e+01	2.231838e+01	7.528746e+00	1.394270e+01
1.018000e+03	1.262586e+03	5.499461e+01	3.835810e+01	5.274559e+01	2.273432e+01	3.307896e+01	1.381161e+01	-2.025583e+00	-8.250730e-01	3.918345e+01	3.044032e+01	4.038417e+01	1.236314e+01	2.230696e+01	-1.949932e+01	1.991582e+01	2.817329e+00	7.344608e+00
1.019000e+03	1.295727e+03	3.498960e+01	3.369713e+01	4.317431e+01	9.727929e+00	2.737210e+01	4.969102e+00	-5.083300e+00	-2.116680e+00	3.581413e+01	2.259106e+01	3.878075e+01	4.395658e+00	2.058535e+01	-1.822497e+01	1.341086e+01	-3.684741e+00	-3.118867e+00
1.020000e+03	1.323517e+03	7.474853e+00	2.543809e+01	2.798149e+01	-8.251907e+00	1.908439e+01	-6.539013e+00	-7.810637e+00	-3.363822e+00	2.880226e+01	1.157197e+01	3.324883e+01	-5.264783e+00	1.641210e+01	-1.786897e+01	3.178598e+00	-1.143271e+01	-1.674951e+01
1.021000e+03	1.340935e+03	-2.583308e+01	1.419761e+01	7.853078e+00	-2.982834e+01	8.657936e+00	-2.017169e+01	-9.936629e+00	-4.668827e+00	1.886679e+01	-2.100778e+00	2.413411e+01	-1.627798e+01	9.956924e+00	-1.893367e+01	-9.963076e+00	-1.986761e+01	-3.245178e+01
1.022000e+03	1.345217e+03	-6.361852e+01	4.285793e-01	-1.657123e+01	-5.381215e+01	-3.588718e+00	-3.534851e+01	-1.145569e+01	-6.223703e+00	6.652633e+00	-1.794010e+01	1.188392e+01	-2.845167e+01	1.372324e+00	-2.160603e+01	-2.510737e+01	-2.870699e+01	-4.915681e+01
1.023000e+03	1.337781e+03	-1.053949e+02	-1.573287e+01	-4.491929e+01	-7.953133e+01	-1.761373e+01	-5.163041e+01	-1.265100e+01	-8.255706e+00	-7.476827e+00	-3.565958e+01	-3.082408e+00	-4.183310e+01	-9.256041e+00	-2.572388e+01	-4.149367e+01	-3.803949e+01	-6.609393e+01
1.024000e+03	1.325314e+03	-1.509150e+02	-3.419142e+01	-7.678301e+01	-1.065530e+02	-3.350883e+01	-6.863522e+01	-1.394103e+01	-1.085889e+01	-2.333222e+01	-5.506420e+01	-2.025106e+01	-5.652808e+01	-2.171518e+01	-3.077594e+01	-5.845871e+01	-4.809552e+01	-8.273069e+01
1.025000e+03	1.319356e+03	-1.988085e+02	-5.430158e+01	-1.110084e+02	-1.339253e+02	-5.112133e+01	-8.572861e+01	-1.560833e+01	-1.376728e+01	-4.053401e+01	-7.570661e+01	-3.869396e+01	-7.231078e+01	-3.529850e+01	-3.594140e+01	-7.514128e+01	-5.878452e+01	-9.842801e+01
1.026000e+03	1.334209e+03	-2.453137e+02	-7.433689e+01	-1.450414e+02	-1.594341e+02	-6.967758e+01	-1.017115e+02	-1.755714e+01	-1.620718e+01	-5.812942e+01	-9.653276e+01	-5.678042e+01	-8.825774e+01	-4.850587e+01	-4.017756e+01	-9.016327e+01	-6.927053e+01	-1.120596e+02
1.027000e+03	1.383615e+03	-2.840494e+02	-9.142316e+01	-1.748430e+02	-1.794227e+02	-8.766197e+01	-1.147598e+02	-1.924426e+01	-1.696976e+01	-7.445308e+01	-1.157706e+02	-7.217946e+01	-1.026609e+02	-5.907031e+01	-4.235016e+01	-1.015506e+02	-7.787081e+01	-1.218864e+02
1.028000e+03	1.477084e+03	-3.072184e+02	-1.021013e+02	-1.955986e+02	-1.894177e+02	-1.030542e+02	-1.227309e+02	-1.983192e+01	-1.475155e+01	-8.734941e+01	-1.311775e+02	-8.226979e+01	-1.133268e+02	-6.441958e+01	-4.138730e+01	-1.070258e+02	-8.238986e+01	-1.258283e+02
1.029000e+03	1.616938e+03	-3.078214e+02	-1.033295e+02	-2.029959e+02	-1.853476e+02	-1.138151e+02	-1.237373e+02	-1.848591e+01	-8.663768e+00	-9.466533e+01	-1.405545e+02	-8.484382e+01	-1.181507e+02	-6.244038e+01	-3.643887e+01	-1.045870e+02	-8.075770e+01	-1.220411e+02
1.030000e+03	1.796888e+03	-2.818981e+02	-9.348626e+01	-1.945287e+02	-1.648216e+02	-1.183853e+02	-1.167294e+02	-1.466853e+01	1.303648e+00	-9.478942e+01	-1.422958e+02	-7.881776e+01	-1.157098e+02	-5.223206e+01	-2.703897e+01	-9.313294e+01	-7.168515e+01	-1.095380e+02
1.031000e+03	2.002493e+03	-2.298525e+02	-7.294195e+01	-1.702787e+02	-1.279556e+02	-1.159928e+02	-1.018407e+02	-8.299222e+00	1.409066e+01	-8.703202e+01	-1.357558e+02	-6.464257e+01	-1.056352e+02	-3.452213e+01	-1.327594e+01	-7.287920e+01	-5.507241e+01	-8.859172e+01
1.032000e+03	2.213365e+03	-1.564579e+02	-4.400254e+01	-1.329206e+02	-7.751281e+01	-1.067188e+02	-8.038618e+01	2.503141e-01	2.776860e+01	-7.177044e+01	-1.213483e+02	-4.425250e+01	-8.866694e+01	-1.157134e+01	4.043823e+00	-4.543698e+01	-3.207172e+01	-6.079226e+01
1.033000e+03	2.406564e+03	-6.979964e+01	-1.033525e+01	-8.706773e+01	-1.847020e+01	-9.141235e+01	-5.458258e+01	1.026487e+01	4.007822e+01	-5.041265e+01	-1.004383e+02	-2.059959e+01	-6.646671e+01	1.337179e+01	2.329278e+01	-1.358189e+01	-4.884437e+00	-2.880632e+01
1.034000e+03	2.560471e+03	2.021741e+01	2.381682e+01	-3.832606e+01	4.270949e+01	-7.158510e+01	-2.715126e+01	2.080458e+01	4.908891e+01	-2.527116e+01	-7.514940e+01	3.012963e+00	-4.133724e+01	3.682479e+01	4.206534e+01	1.916379e+01	2.354900e+01	4.019930e+00
1.035000e+03	2.658420e+03	1.032314e+02	5.431999e+01	7.573347e+00	9.886426e+01	-4.934020e+01	-9.475622e-01	3.078080e+01	5.370389e+01	6.171076e-01	-4.816679e+01	2.354010e+01	-1.596468e+01	5.574165e+01	5.743827e+01	4.901095e+01	4.985578e+01	3.408829e+01
1.036000e+03	2.691508e+03	1.694352e+02	7.757236e+01	4.536621e+01	1.429042e+02	-2.727934e+01	2.132910e+01	3.900746e+01	5.380770e+01	2.376570e+01	-2.252891e+01	3.856598e+01	6.802418e+00	6.789648e+01	6.645136e+01	7.237541e+01	7.053030e+01	5.795353e+01
1.037000e+03	2.660165e+03	2.103485e+02	9.068641e+01	7.059273e+01	1.686047e+02	-8.280954e+00	3.736854e+01	4.428929e+01	5.002267e+01	4.066473e+01	-1.347574e+00	4.639834e+01	2.419647e+01	7.194128e+01	6.671601e+01	8.631552e+01	8.228984e+01	7.270928e+01
1.038000e+03	2.574241e+03	2.195675e+02	9.157003e+01	7.983031e+01	1.714373e+02	4.903351e+00	4.546787e+01	4.559098e+01	4.322510e+01	4.834581e+01	1.257994e+01	4.598038e+01	3.385170e+01	6.725080e+01	5.698736e+01	8.891158e+01	8.252571e+01	7.635540e+01
1.039000e+03	2.451557e+03	1.935829e+02	7.904432e+01	7.096013e+01	1.493362e+02	1.016769e+01	4.473627e+01	4.226932e+01	3.407745e+01	4.496755e+01	1.722270e+01	3.677636e+01	3.418505e+01	5.373723e+01	3.752513e+01	7.953729e+01	6.979853e+01	6.810364e+01
1.040000e+03	2.315109e+03	1.325224e+02	5.304339e+01	4.349382e+01	1.031980e+02	6.515742e+00	3.523799e+01	3.428728e+01	2.280697e+01	3.023685e+01	1.171064e+01	1.875744e+01	2.473707e+01	3.178239e+01	1.012750e+01	5.896008e+01	4.423765e+01	4.854295e+01
1.041000e+03	2.189359e+03	4.051586e+01	1.482380e+01	-1.146047e+00	3.691296e+01	-5.719049e+00	1.800626e+01	2.230884e+01	9.320091e+00	5.503822e+00	-3.470298e+00	-7.483824e+00	6.337889e+00	2.322991e+00	-2.217828e+01	2.922990e+01	7.683201e+00	1.959475e+01
1.042000e+03	2.096238e+03	-7.460075e+01	-3.296337e+01	-5.956958e+01	-4.316299e+01	-2.500383e+01	-5.110509e+00	7.609107e+00	-6.435982e+00	-2.652762e+01	-2.657286e+01	-4.057146e+01	-1.899850e+01	-3.299825e+01	-5.570460e+01	-6.633768e+00	-3.652848e+01	-1.576013e+01
1.043000e+03	2.051561e+03	-2.023404e+02	-8.647067e+01	-1.267309e+02	-1.292157e+02	-4.905235e+01	-3.175175e+01	-8.192512e+00	-2.407442e+01	-6.239681e+01	-5.496270e+01	-7.827738e+01	-4.845419e+01	-7.176973e+01	-8.678357e+01	-4.509592e+01	-8.411842e+01	-5.393702e+01
1.044000e+03	2.062402e+03	-3.312033e+02	-1.411573e+02	-1.966228e+02	-2.132355e+02	-7.542051e+01	-5.942361e+01	-2.349347e+01	-4.254915e+01	-9.860899e+01	-8.566025e+01	-1.176633e+02	-7.896030e+01	-1.109639e+02	-1.123953e+02	-8.261199e+01	-1.306218e+02	-9.129199e+01
1.045000e+03	2.125820e+03	-4.504927e+02	-1.924951e+02	-2.632100e+02	-2.882370e+02	-1.020265e+02	-8.585467e+01	-3.703978e+01	-6.023056e+01	-1.322657e+02	-1.158811e+02	-1.554551e+02	-1.077555e+02	-1.473299e+02	-1.306101e+02	-1.160939e+02	-1.721414e+02	-1.246436e+02
1.046000e+03	2.229138e+03	-5.518137e+02	-2.366748e+02	-3.213436e+02	-3.491544e+02	-1.274124e+02	-1.092431e+02	-4.811573e+01	-7.524760e+01	-1.614285e+02	-1.434175e+02	-1.885591e+02	-1.327849e+02	-1.779266e+02	-1.407693e+02	-1.432594e+02	-2.058938e+02	-1.516683e+02
1.047000e+03	2.351835e+03	-6.298717e+02	-2.710961e+02	-3.673999e+02	-3.932326e+02	-1.506859e+02	-1.283554e+02	-5.653871e+01	-8.595310e+01	-1.851445e+02	-1.667785e+02	-2.145577e+02	-1.528421e+02	-2.006213e+02	-1.433924e+02	-1.628140e+02	-2.304183e+02	-1.710971e+02
1.048000e+03	2.468956e+03	-6.824540e+02	-2.945200e+02	-3.994975e+02	-4.198870e+02	-1.712316e+02	-1.424931e+02	-6.248922e+01	-9.133459e+01	-2.031869e+02	-1.851075e+02	-2.320312e+02	-1.674658e+02	-2.143896e+02	-1.398653e+02	-1.744484e+02	-2.454395e+02	-1.826873e+02
1.049000e+03	2.555664e+03	-7.097846e+02	-3.069002e+02	-4.173175e+02	-4.301674e+02	-1.883786e+02	-1.513906e+02	-6.627476e+01	-9.123720e+01	-2.156645e+02	-1.979791e+02	-2.406260e+02	-1.766905e+02	-2.193376e+02	-1.320030e+02	-1.786765e+02	-2.514931e+02	-1.870058e+02
1.050000e+03	2.592201e+03	-7.136395e+02	-3.090337e+02	-4.216843e+02	-4.260647e+02	-2.012229e+02	-1.551125e+02	-6.814471e+01	-8.635002e+01	-2.226850e+02	-2.052044e+02	-2.408895e+02	-1.807933e+02	-2.164787e+02	-1.216047e+02	-1.765746e+02	-2.494937e+02	-1.851086e+02
1.051000e+03	2.568126e+03	-6.966036e+02	-3.021959e+02	-4.141070e+02	-4.099076e+02	-2.087059e+02	-1.539946e+02	-6.823185e+01	-7.798766e+01	-2.242094e+02	-2.067350e+02	-2.339645e+02	-1.801407e+02	-2.073708e+02	-1.101076e+02	-1.694980e+02	-2.404144e+02	-1.782240e+02
1.052000e+03	2.484668e+03	-6.616536e+02	-2.878701e+02	-3.964159e+02	-3.839964e+02	-2.099092e+02	-1.486200e+02	-6.661597e+01	-6.774510e+01	-2.201262e+02	-2.026791e+02	-2.212546e+02	-1.751593e+02	-1.937356e+02	-9.841194e+01	-1.588369e+02	-2.251654e+02	-1.675219e+02
1.053000e+03	2.354371e+03	-6.120070e+02	-2.675784e+02	-3.705216e+02	-3.504783e+02	-2.044072e+02	-1.397862e+02	-6.343422e+01	-5.711814e+01	-2.104613e+02	-1.933743e+02	-2.041446e+02	-1.663750e+02	-1.771460e+02	-8.689428e+01	-1.458401e+02	-2.046450e+02	-1.539948e+02
1.054000e+03	2.198033e+03	-5.510361e+02	-2.427613e+02	-3.382508e+02	-3.113606e+02	-1.924943e+02	-1.284141e+02	-5.894503e+01	-4.717760e+01	-1.955846e+02	-1.794338e+02	-1.838166e+02	-1.544321e+02	-1.588156e+02	-7.557263e+01	-1.315042e+02	-1.798637e+02	-1.384314e+02
1.055000e+03	2.039813e+03	-4.820978e+02	-2.146714e+02	-3.012180e+02	-2.685433e+02	-1.751747e+02	-1.153980e+02	-5.349800e+01	-3.837609e+01	-1.762962e+02	-1.617134e+02	-1.611737e+02	-1.400421e+02	-1.395031e+02	-6.434846e+01	-1.165193e+02	-1.520314e+02	-1.214381e+02
1.056000e+03	1.901979e+03	-4.083094e+02	-1.843080e+02	-2.607517e+02	-2.238249e+02	-1.539347e+02	-1.014498e+02	-4.743947e+01	-3.054627e+01	-1.537625e+02	-1.412094e+02	-1.368687e+02	-1.238807e+02	-1.195406e+02	-5.323883e+01	-1.012774e+02	-1.225546e+02	-1.034914e+02
1.057000e+03	1.800795e+03	-3.324540e+02	-1.524706e+02	-2.179438e+02	-1.789171e+02	-1.304265e+02	-8.702437e+01	-4.103789e+01	-2.310736e+01	-1.293640e+02	-1.189490e+02	-1.114329e+02	-1.065084e+02	-9.899272e+01	-4.252752e+01	-8.596164e+01	-9.296202e+01	-8.502418e+01
1.058000e+03	1.744462e+03	-2.571821e+02	-1.199832e+02	-1.738728e+02	-1.355315e+02	-1.062188e+02	-7.239079e+01	-3.450567e+01	-1.542948e+01	-1.045543e+02	-9.593928e+01	-8.547756e+01	-8.839241e+01	-7.793100e+01	-3.279703e+01	-7.072612e+01	-6.481113e+01	-6.655594e+01
1.059000e+03	1.733222e+03	-1.854859e+02	-8.803709e+01	-1.299563e+02	-9.553995e+01	-8.270984e+01	-5.783432e+01	-2.812787e+01	-7.234745e+00	-8.080284e+01	-7.320261e+01	-5.990918e+01	-7.004412e+01	-5.675087e+01	-2.484092e+01	-5.592717e+01	-3.961756e+01	-4.884254e+01
1.060000e+03	1.761037e+03	-1.211828e+02	-5.849434e+01	-8.827730e+01	-6.111624e+01	-6.118857e+01	-4.389243e+01	-2.242679e+01	1.122298e+00	-5.961701e+01	-5.185934e+01	-3.606743e+01	-5.220673e+01	-3.641493e+01	-1.948849e+01	-4.232073e+01	-1.879928e+01	-3.297575e+01
1.061000e+03	1.817969e+03	-6.903068e+01	-3.394836e+01	-5.168045e+01	-3.471420e+01	-4.294129e+01	-3.148656e+01	-1.824771e+01	8.623855e+00	-4.257246e+01	-3.317864e+01	-1.570046e+01	-3.597679e+01	-1.849868e+01	-1.739411e+01	-3.111756e+01	-3.599394e+00	-2.034848e+01
1.062000e+03	1.892469e+03	-3.421409e+01	-1.741215e+01	-2.349747e+01	-1.878104e+01	-2.927994e+01	-2.184764e+01	-1.667572e+01	1.384458e+01	-3.125686e+01	-1.852155e+01	-7.361800e-01	-2.275813e+01	-4.972853e+00	-1.884822e+01	-2.382429e+01	5.041511e+00	-1.243928e+01
1.063000e+03	1.973196e+03	-2.123534e+01	-1.166067e+01	-6.911630e+00	-1.523079e+01	-2.142080e+01	-1.622909e+01	-1.877303e+01	1.541255e+01	-2.707322e+01	-9.152293e+00	7.112682e+00	-1.402128e+01	2.243561e+00	-2.365766e+01	-2.188106e+01	6.649573e+00	-1.045046e+01
1.064000e+03	2.050250e+03	-3.256168e+01	-1.841983e+01	-4.139875e+00	-2.483963e+01	-2.023189e+01	-1.550828e+01	-2.521777e+01	1.250472e+01	-3.092442e+01	-5.963733e+00	6.798324e+00	-1.093532e+01	1.826527e+00	-3.112295e+01	-2.620013e+01	1.360910e+00	-1.491454e+01
1.065000e+03	2.115968e+03	-6.754130e+01	-3.768618e+01	-1.571138e+01	-4.679249e+01	-2.594332e+01	-1.983715e+01	-3.598095e+01	5.188036e+00	-4.287393e+01	-9.212132e+00	-1.704788e+00	-1.400387e+01	-6.496806e+00	-4.011741e+01	-3.676683e+01	-1.002408e+01	-2.541791e+01
1.066000e+03	2.165344e+03	-1.220249e+02	-6.743346e+01	-4.010338e+01	-7.857046e+01	-3.794035e+01	-2.848606e+01	-5.017242e+01	-5.521810e+00	-6.191117e+01	-1.836117e+01	-1.726057e+01	-2.284022e+01	-2.173996e+01	-4.925368e+01	-5.245573e+01	-2.611198e+01	-4.055668e+01
1.067000e+03	2.196151e+03	-1.888635e+02	-1.038306e+02	-7.386927e+01	-1.162432e+02	-5.472818e+01	-3.994363e+01	-6.612558e+01	-1.790085e+01	-8.592910e+01	-3.209423e+01	-3.770461e+01	-3.616219e+01	-4.177292e+01	-5.711024e+01	-7.114328e+01	-4.509614e+01	-5.815421e+01
1.068000e+03	2.208758e+03	-2.591360e+02	-1.419213e+02	-1.122223e+02	-1.550887e+02	-7.409498e+01	-5.223397e+01	-8.170518e+01	-2.996182e+01	-1.119586e+02	-4.849321e+01	-6.021573e+01	-5.200419e+01	-6.372703e+01	-6.248004e+01	-9.009630e+01	-6.498784e+01	-7.567701e+01
1.069000e+03	2.205702e+03	-3.237471e+02	-1.765728e+02	-1.499013e+02	-1.903734e+02	-9.343986e+01	-6.334140e+01	-9.475009e+01	-3.994395e+01	-1.366277e+02	-6.533416e+01	-8.182242e+01	-6.807666e+01	-8.456515e+01	-6.459574e+01	-1.065281e+02	-8.384022e+01	-9.072861e+01
1.070000e+03	2.191186e+03	-3.750008e+02	-2.034478e+02	-1.820994e+02	-2.181202e+02	-1.101995e+02	-7.161984e+01	-1.035284e+02	-4.669150e+01	-1.567550e+02	-8.043702e+01	-9.991928e+01	-8.217802e+01	-1.016604e+02	-6.328127e+01	-1.181745e+02	-9.994081e+01	-1.015003e+02
1.071000e+03	2.170630e+03	-4.078686e+02	-2.197850e+02	-2.052779e+02	-2.357489e+02	-1.223014e+02	-7.610200e+01	-1.070917e+02	-4.982858e+01	-1.699551e+02	-9.202121e+01	-1.126933e+02	-9.258274e+01	-1.132548e+02	-5.898657e+01	-1.237550e+02	-1.119896e+02	-1.070985e+02
1.072000e+03	2.150357e+03	-4.208163e+02	-2.248599e+02	-2.177677e+02	-2.425259e+02	-1.285759e+02	-7.667707e+01	-1.054555e+02	-4.972445e+01	-1.751343e+02	-9.903541e+01	-1.194046e+02	-9.836143e+01	-1.187306e+02	-5.268393e+01	-1.232350e+02	-1.192877e+02	-1.077140e+02
1.073000e+03	2.137272e+03	-4.161244e+02	-2.200747e+02	-2.200994e+02	-2.397732e+02	-1.290503e+02	-7.413708e+01	-9.957816e+01	-4.731027e+01	-1.727634e+02	-1.014195e+02	-1.204969e+02	-9.960113e+01	-1.186784e+02	-4.563928e+01	-1.178499e+02	-1.219214e+02	-1.046228e+02
1.074000e+03	2.138354e+03	-3.996047e+02	-2.086662e+02	-2.149911e+02	-2.307479e+02	-1.250364e+02	-7.008621e+01	-9.115268e+01	-4.382919e+01	-1.648363e+02	-1.002221e+02	-1.175140e+02	-9.747599e+01	-1.147678e+02	-3.910859e+01	-1.098859e+02	-1.208612e+02	-9.999771e+01
1.075000e+03	2.159804e+03	-3.795758e+02	-1.950429e+02	-2.068888e+02	-2.200841e+02	-1.189206e+02	-6.668631e+01	-8.225083e+01	-4.057928e+01	-1.544632e+02	-9.747237e+01	-1.127925e+02	-9.409531e+01	-1.094154e+02	-3.403534e+01	-1.022287e+02	-1.178556e+02	-9.651008e+01
1.076000e+03	2.205948e+03	-3.650483e+02	-1.838021e+02	-2.009963e+02	-2.127594e+02	-1.136226e+02	-6.621552e+01	-7.488078e+01	-3.867414e+01	-1.451281e+02	-9.573651e+01	-1.089217e+02	-9.207352e+01	-1.052589e+02	-3.083055e+01	-9.772059e+01	-1.150395e+02	-9.672769e+01
1.077000e+03	2.278219e+03	-3.633451e+02	-1.785788e+02	-2.018910e+02	-2.127273e+02	-1.117957e+02	-7.047534e+01	-7.054145e+01	-3.883022e+01	-1.397492e+02	-9.739715e+01	-1.080377e+02	-9.385222e+01	-1.044931e+02	-2.929798e+01	-9.842823e+01	-1.142996e+02	-1.023989e+02
1.078000e+03	2.374643e+03	-3.777531e+02	-1.809974e+02	-2.120577e+02	-2.215813e+02	-1.149771e+02	-8.017865e+01	-6.987350e+01	-4.120350e+01	-1.397948e+02	-1.038410e+02	-1.111242e+02	-1.009324e+02	-1.082161e+02	-2.872904e+01	-1.049955e+02	-1.165857e+02	-1.138104e+02
1.079000e+03	2.490111e+03	-4.060336e+02	-1.900689e+02	-2.308412e+02	-2.377448e+02	-1.229763e+02	-9.452991e+01	-7.250424e+01	-4.532256e+01	-1.447475e+02	-1.148427e+02	-1.175649e+02	-1.132752e+02	-1.159979e+02	-2.814222e+01	-1.163001e+02	-1.214437e+02	-1.294565e+02
1.080000e+03	2.617410e+03	-4.405006e+02	-2.023076e+02	-2.542878e+02	-2.565876e+02	-1.337568e+02	-1.112030e+02	-7.714496e+01	-5.016804e+01	-1.521408e+02	-1.284179e+02	-1.251627e+02	-1.291241e+02	-1.258695e+02	-2.659615e+01	-1.295859e+02	-1.269997e+02	-1.462064e+02
1.081000e+03	2.748683e+03	-4.698729e+02	-2.126210e+02	-2.760659e+02	-2.715634e+02	-1.439115e+02	-1.268049e+02	-8.192704e+01	-5.441170e+01	-1.582105e+02	-1.412642e+02	-1.306940e+02	-1.453713e+02	-1.348016e+02	-2.347962e+01	-1.411026e+02	-1.304580e+02	-1.599920e+02
1.082000e+03	2.876779e+03	-4.824108e+02	-2.157402e+02	-2.892371e+02	-2.760512e+02	-1.496103e+02	-1.377251e+02	-8.488267e+01	-5.676463e+01	-1.589765e+02	-1.496810e+02	-1.308576e+02	-1.583796e+02	-1.395565e+02	-1.868852e+01	-1.470900e+02	-1.289580e+02	-1.668408e+02
1.083000e+03	2.996018e+03	-4.693080e+02	-2.077316e+02	-2.882919e+02	-2.652840e+02	-1.477128e+02	-1.411037e+02	-8.442450e+01	-5.632806e+01	-1.514041e+02	-1.506597e+02	-1.233072e+02	-1.649855e+02	-1.376333e+02	-1.263969e+01	-1.447938e+02	-1.204871e+02	-1.639212e+02
1.084000e+03	3.102185e+03	-4.271888e+02	-1.870907e+02	-2.707472e+02	-2.377065e+02	-1.366727e+02	-1.355865e+02	-7.968295e+01	-5.282751e+01	-1.342633e+02	-1.427663e+02	-1.074080e+02	-1.633409e+02	-1.279825e+02	-6.131358e+00	-1.331759e+02	-1.045279e+02	-1.502626e+02
1.085000e+03	3.191841e+03	-3.589170e+02	-1.550788e+02	-2.377765e+02	-1.953394e+02	-1.169445e+02	-1.216172e+02	-7.061854e+01	-4.665175e+01	-1.084268e+02	-1.265218e+02	-8.446069e+01	-1.533182e+02	-1.112569e+02	-1.128320e-01	-1.130984e+02	-8.223909e+01	-1.269315e+02
1.086000e+03	3.261384e+03	-2.725778e+02	-1.152532e+02	-1.937289e+02	-1.431152e+02	-9.078851e+01	-1.011965e+02	-5.791245e+01	-3.869322e+01	-7.655929e+01	-1.041817e+02	-5.734132e+01	-1.363903e+02	-8.954950e+01	4.548955e+00	-8.696637e+01	-5.614799e+01	-9.666001e+01
1.087000e+03	3.306340e+03	-1.791400e+02	-7.242284e+01	-1.447973e+02	-8.751097e+01	-6.158758e+01	-7.723982e+01	-4.271141e+01	-3.006087e+01	-4.236092e+01	-7.903931e+01	-2.971211e+01	-1.150879e+02	-6.576007e+01	7.232495e+00	-5.801249e+01	-2.949858e+01	-6.310274e+01
1.088000e+03	3.321344e+03	-8.968586e+01	-3.143022e+01	-9.736911e+01	-3.498306e+01	-3.294711e+01	-5.279590e+01	-2.633569e+01	-2.177536e+01	-9.653573e+00	-5.452943e+01	-5.095282e+00	-9.227608e+01	-4.284121e+01	7.621803e+00	-2.950194e+01	-5.482024e+00	-2.999527e+01
1.089000e+03	3.301015e+03	-1.310291e+01	3.846950e+00	-5.662308e+01	9.318270e+00	-7.892691e+00	-3.039772e+01	-1.004414e+01	-1.454820e+01	1.839656e+01	-3.344827e+01	1.389035e+01	-7.051488e+01	-2.317545e+01	5.677721e+00	-4.108299e+00	1.342504e+01	-4.568887e-01
1.090000e+03	3.241602e+03	4.519190e+01	3.103029e+01	-2.575044e+01	4.227182e+01	1.159776e+01	-1.172110e+01	5.097992e+00	-8.697180e+00	3.972890e+01	-1.751570e+01	2.593165e+01	-5.168258e+01	-8.234398e+00	1.564973e+00	1.640995e+01	2.585990e+01	2.342307e+01
1.091000e+03	3.142910e+03	8.339088e+01	4.928262e+01	-5.877702e+00	6.290362e+01	2.465647e+01	2.429343e+00	1.825905e+01	-4.188134e+00	5.347209e+01	-7.341588e+00	3.102310e+01	-3.690036e+01	1.465140e+00	-4.416205e+00	3.124465e+01	3.165672e+01	4.070059e+01
1.092000e+03	3.009756e+03	1.026030e+02	5.900869e+01	3.507839e+00	7.204816e+01	3.128439e+01	1.191887e+01	2.883686e+01	-7.474613e-01	5.975732e+01	-2.691241e+00	3.017159e+01	-2.666258e+01	6.200986e+00	-1.186322e+01	4.039133e+01	3.165444e+01	5.146447e+01
1.093000e+03	2.852275e+03	1.058231e+02	6.143767e+01	3.954425e+00	7.177957e+01	3.200892e+01	1.703100e+01	3.646204e+01	2.018063e+00	5.942054e+01	-2.851837e+00	2.497563e+01	-2.101960e+01	6.808503e+00	-2.026699e+01	4.444207e+01	2.733512e+01	5.659156e+01
1.094000e+03	2.684688e+03	9.698590e+01	5.825891e+01	-2.464666e+00	6.481152e+01	2.762975e+01	1.829265e+01	4.102986e+01	4.529796e+00	5.372975e+01	-6.917693e+00	1.722924e+01	-1.969212e+01	4.455326e+00	-2.899399e+01	4.439212e+01	2.041727e+01	5.744541e+01
1.095000e+03	2.522799e+03	8.029607e+01	5.136351e+01	-1.346604e+01	5.398013e+01	1.913322e+01	1.641070e+01	4.273884e+01	7.169615e+00	4.419421e+01	-1.391206e+01	8.625006e+00	-2.208920e+01	4.482356e-01	-3.729050e+01	4.147126e+01	1.250725e+01	5.556244e+01
1.096000e+03	2.380989e+03	5.979359e+01	4.264358e+01	-2.673515e+01	4.184614e+01	7.725004e+00	1.226983e+01	4.208694e+01	1.021090e+01	3.243266e+01	-2.278109e+01	5.570241e-01	-2.729020e+01	-3.951904e+00	-4.433987e+01	3.697721e+01	4.868149e+00	5.235662e+01
1.097000e+03	2.269720e+03	3.902003e+01	3.378067e+01	-4.008870e+01	3.041682e+01	-5.143808e+00	6.910318e+00	3.978421e+01	1.373672e+01	2.004361e+01	-3.236324e+01	-6.003209e+00	-3.408318e+01	-7.723145e+00	-4.938240e+01	3.209761e+01	-1.680432e+00	4.888255e+01
1.098000e+03	2.194344e+03	2.070344e+01	2.601331e+01	-5.168590e+01	2.098958e+01	-1.786536e+01	1.433712e+00	3.658142e+01	1.756980e+01	8.442860e+00	-4.142794e+01	-1.056793e+01	-4.111500e+01	-1.025518e+01	-5.187643e+01	2.774191e+01	-6.750617e+00	4.570692e+01
1.099000e+03	2.155428e+03	6.499669e+00	1.994971e+01	-6.025284e+01	1.412714e+01	-2.890041e+01	-3.156330e+00	3.306297e+01	2.126404e+01	-1.315257e+00	-4.881094e+01	-1.311331e+01	-4.713559e+01	-1.143833e+01	-5.165249e+01	2.442884e+01	-1.029849e+01	4.292631e+01
1.100000e+03	2.150206e+03	-3.098886e+00	1.552059e+01	-6.522188e+01	9.764149e+00	-3.706642e+01	-6.122624e+00	2.948140e+01	2.419478e+01	-8.675383e+00	-5.360144e+01	-1.396118e+01	-5.125557e+01	-1.161583e+01	-4.900179e+01	2.226836e+01	-1.249956e+01	4.032655e+01
1.101000e+03	2.174440e+03	-8.599974e+00	1.212346e+01	-6.670410e+01	7.418634e+00	-4.176314e+01	-7.104004e+00	2.570357e+01	2.573613e+01	-1.361410e+01	-5.529718e+01	-1.358085e+01	-5.311690e+01	-1.140114e+01	-4.465493e+01	2.104483e+01	-1.362023e+01	3.762608e+01
1.102000e+03	2.223952e+03	-1.110157e+01	8.925300e+00	-6.528728e+01	6.458627e+00	-4.302735e+01	-6.119557e+00	2.130061e+01	2.545903e+01	-1.653537e+01	-5.385441e+01	-1.237640e+01	-5.290345e+01	-1.142601e+01	-3.964331e+01	2.037201e+01	-1.390634e+01	3.471204e+01
1.103000e+03	2.295393e+03	-1.174311e+01	5.220023e+00	-6.172929e+01	6.367591e+00	-4.137999e+01	-3.462378e+00	1.576284e+01	2.326160e+01	-1.804342e+01	-4.960617e+01	-1.054425e+01	-5.117684e+01	-1.211538e+01	-3.507778e+01	1.987355e+01	-1.349810e+01	3.178400e+01
1.104000e+03	2.386186e+03	-1.117968e+01	7.196872e-01	-5.665485e+01	6.960301e+00	-3.751875e+01	4.808557e-01	8.776328e+00	1.937174e+01	-1.865408e+01	-4.307997e+01	-8.058341e+00	-4.858791e+01	-1.356660e+01	-3.190838e+01	1.934469e+01	-1.237598e+01	2.936276e+01
1.105000e+03	2.493913e+03	-9.235572e+00	-4.306080e+00	-5.035313e+01	8.510705e+00	-3.197778e+01	5.420231e+00	4.720462e-01	1.422540e+01	-1.853364e+01	-3.478721e+01	-4.779987e+00	-4.556452e+01	-1.555746e+01	-3.073091e+01	1.886342e+01	-1.034397e+01	2.817620e+01
1.106000e+03	2.615547e+03	-4.842839e+00	-9.067771e+00	-4.272929e+01	1.175975e+01	-2.489439e+01	1.129265e+01	-8.441743e+00	8.286879e+00	-1.735687e+01	-2.506733e+01	-6.279211e-01	-4.209306e+01	-1.765365e+01	-3.168246e+01	1.882923e+01	-7.060596e+00	2.897575e+01
1.107000e+03	2.746964e+03	3.706260e+00	-1.244250e+01	-3.341028e+01	1.778163e+01	-1.598285e+01	1.828021e+01	-1.672726e+01	1.903915e+00	-1.434860e+01	-1.404478e+01	4.282966e+00	-3.768549e+01	-1.935762e+01	-3.443400e+01	1.991364e+01	-2.123172e+00	3.234886e+01
1.108000e+03	2.882955e+03	1.824936e+01	-1.325067e+01	-2.195969e+01	2.771348e+01	-4.733717e+00	2.670455e+01	-2.285896e+01	-4.732536e+00	-8.520185e+00	-1.710005e+00	9.606722e+00	-3.155939e+01	-2.024247e+01	-3.826240e+01	2.291750e+01	4.804631e+00	3.857788e+01
1.109000e+03	3.017802e+03	4.012081e+01	-1.055527e+01	-8.127864e+00	4.239771e+01	9.234422e+00	3.683110e+01	-2.541068e+01	-1.151207e+01	9.549832e-01	1.191601e+01	1.485414e+01	-2.297584e+01	-2.003751e+01	-4.217704e+01	2.855142e+01	1.385460e+01	4.756873e+01
1.110000e+03	3.146181e+03	6.958035e+01	-3.918384e+00	7.946433e+00	6.203265e+01	2.581008e+01	4.865481e+01	-2.348223e+01	-1.826192e+01	1.434203e+01	2.660935e+01	1.956292e+01	-1.161126e+01	-1.865752e+01	-4.508221e+01	3.718691e+01	2.485360e+01	5.884893e+01
1.111000e+03	3.264075e+03	1.054930e+02	6.443791e+00	2.565666e+01	8.595026e+01	4.416552e+01	6.175183e+01	-1.703073e+01	-2.462142e+01	3.106406e+01	4.184617e+01	2.347397e+01	2.186959e+00	-1.618518e+01	-4.596242e+01	4.865095e+01	3.730665e+01	7.162407e+01
1.112000e+03	3.369320e+03	1.453899e+02	1.965157e+01	4.401231e+01	1.126154e+02	6.278575e+01	7.526418e+01	-6.987175e+00	-3.000931e+01	4.966007e+01	5.683836e+01	2.663855e+01	1.737712e+01	-1.282275e+01	-4.407283e+01	6.213951e+01	5.048265e+01	8.488033e+01
1.113000e+03	3.461498e+03	1.859190e+02	3.431139e+01	6.187079e+01	1.398677e+02	7.976895e+01	8.803722e+01	4.899389e+00	-3.371543e+01	6.802633e+01	7.070414e+01	2.941214e+01	3.246130e+01	-8.830960e+00	-3.910345e+01	7.629600e+01	6.357798e+01	9.751883e+01
1.114000e+03	3.541043e+03	2.235434e+02	4.878981e+01	7.823367e+01	1.653303e+02	9.330681e+01	9.886960e+01	1.645746e+01	-3.509157e+01	8.388113e+01	8.270946e+01	3.233280e+01	4.590310e+01	-4.474090e+00	-3.127690e+01	8.944569e+01	7.589053e+01	1.084990e+02
1.115000e+03	3.607693e+03	2.552281e+02	6.152866e+01	9.247389e+01	1.868342e+02	1.021682e+02	1.067856e+02	2.561131e+01	-3.377230e+01	9.530089e+01	9.246661e+01	3.591805e+01	5.655802e+01	8.603467e-03	-2.134672e+01	9.992027e+01	8.691957e+01	1.169573e+02
1.116000e+03	3.658764e+03	2.788550e+02	7.129821e+01	1.043708e+02	2.027051e+02	1.059939e+02	1.112275e+02	3.086074e+01	-2.984207e+01	1.011403e+02	9.997870e+01	4.043837e+01	6.393491e+01	4.393338e+00	-1.048702e+01	1.063762e+02	9.633431e+01	1.222699e+02
1.117000e+03	3.688007e+03	2.932384e+02	7.731547e+01	1.139189e+02	2.118381e+02	1.052827e+02	1.121046e+02	3.157826e+01	-2.388065e+01	1.011962e+02	1.054870e+02	4.573826e+01	6.818375e+01	8.433341e+00	-9.282038e-02	1.080205e+02	1.038229e+02	1.240496e+02
1.118000e+03	3.685886e+03	2.978438e+02	7.922748e+01	1.210152e+02	2.136132e+02	1.010897e+02	1.097062e+02	2.805155e+01	-1.685743e+01	9.608512e+01	1.091886e+02	5.117704e+01	6.984197e+01	1.182832e+01	8.470043e+00	1.047038e+02	1.089145e+02	1.221033e+02
1.119000e+03	3.641695e+03	2.924963e+02	7.703343e+01	1.252336e+02	2.077989e+02	9.459347e+01	1.045580e+02	2.129376e+01	-9.894222e+00	8.692795e+01	1.109837e+02	5.574077e+01	6.949739e+01	1.425210e+01	1.411978e+01	9.689443e+01	1.109094e+02	1.164063e+02
1.120000e+03	3.547138e+03	2.773791e+02	7.104550e+01	1.258862e+02	1.945945e+02	8.674782e+01	9.731705e+01	1.272018e+01	-3.961210e+00	7.500714e+01	1.104204e+02	5.832635e+01	6.756475e+01	1.546813e+01	1.627268e+01	8.557807e+01	1.090210e+02	1.071401e+02
1.121000e+03	3.400179e+03	2.534275e+02	6.194197e+01	1.224168e+02	1.748527e+02	7.817727e+01	8.876230e+01	3.815838e+00	3.999939e-01	6.154258e+01	1.069113e+02	5.812707e+01	6.429480e+01	1.550790e+01	1.497024e+01	7.212894e+01	1.027276e+02	9.479973e+01
1.122000e+03	3.207544e+03	2.229178e+02	5.087264e+01	1.149607e+02	1.503627e+02	6.932526e+01	7.984876e+01	-4.110554e+00	3.232939e+00	4.764055e+01	1.001362e+02	5.498407e+01	5.998145e+01	1.482671e+01	1.087468e+01	5.816496e+01	9.220076e+01	8.031318e+01
1.123000e+03	2.984697e+03	1.898239e+02	3.949812e+01	1.047478e+02	1.239696e+02	6.071531e+01	7.173318e+01	-1.005334e+01	5.142862e+00	3.435640e+01	9.042347e+01	4.955232e+01	5.519991e+01	1.432631e+01	5.103699e+00	4.537476e+01	7.859692e+01	6.507490e+01
1.124000e+03	2.753111e+03	1.595384e+02	2.984136e+01	9.406414e+01	9.932596e+01	5.312420e+01	6.567594e+01	-1.334311e+01	7.092884e+00	2.274994e+01	7.889056e+01	4.318541e+01	5.088268e+01	1.517534e+01	-1.084303e+00	3.530182e+01	6.402533e+01	5.081218e+01
1.125000e+03	2.535854e+03	1.378549e+02	2.392068e+01	8.570081e+01	8.024002e+01	4.753661e+01	6.280282e+01	-1.363779e+01	1.008370e+01	1.383878e+01	6.724701e+01	3.755957e+01	4.814478e+01	1.845544e+01	-6.683707e+00	2.910487e+01	5.113568e+01	3.927660e+01
1.126000e+03	2.353123e+03	1.295381e+02	2.327233e+01	8.211884e+01	6.981202e+01	4.490766e+01	6.381913e+01	-1.090789e+01	1.482437e+01	8.450082e+00	5.735345e+01	3.418156e+01	4.794054e+01	2.476706e+01	-1.129000e+01	2.736129e+01	4.245100e+01	3.185332e+01
1.127000e+03	2.219200e+03	1.371093e+02	2.857305e+01	8.474943e+01	6.970799e+01	4.590077e+01	6.883798e+01	-5.415677e+00	2.150686e+01	7.068557e+00	5.077114e+01	3.399035e+01	5.076225e+01	3.398017e+01	-1.526843e+01	3.000550e+01	3.970294e+01	2.924835e+01
1.128000e+03	2.141458e+03	1.604448e+02	3.956008e+01	9.380410e+01	7.989885e+01	5.079251e+01	7.745320e+01	2.338115e+00	2.975971e+01	9.802840e+00	4.853660e+01	3.722387e+01	5.658347e+01	4.526973e+01	-1.966228e+01	3.646338e+01	4.343662e+01	3.139896e+01
1.129000e+03	2.121070e+03	1.973683e+02	5.529946e+01	1.086792e+02	9.897105e+01	5.961487e+01	8.905320e+01	1.171729e+01	3.878817e+01	1.651370e+01	5.124061e+01	4.358434e+01	6.509835e+01	5.744132e+01	-2.586674e+01	4.595209e+01	5.302122e+01	3.764537e+01
1.130000e+03	2.154516e+03	2.448239e+02	7.463661e+01	1.286500e+02	1.247903e+02	7.240541e+01	1.031994e+02	2.207750e+01	4.763298e+01	2.700580e+01	5.926610e+01	5.256151e+01	7.609215e+01	6.938704e+01	-3.520802e+01	5.780010e+01	6.699393e+01	4.705024e+01
1.131000e+03	2.234992e+03	2.997688e+02	9.650090e+01	1.532878e+02	1.550545e+02	8.929010e+01	1.197862e+02	3.284556e+01	5.542754e+01	4.107509e+01	7.288575e+01	6.365795e+01	8.963385e+01	8.040573e+01	-4.862598e+01	7.157176e+01	8.348801e+01	5.864168e+01
1.132000e+03	2.353360e+03	3.589581e+02	1.197526e+02	1.821007e+02	1.872775e+02	1.101519e+02	1.387514e+02	4.346993e+01	6.153013e+01	5.822361e+01	9.195457e+01	7.628546e+01	1.058194e+02	9.015013e+01	-6.662091e+01	8.682390e+01	1.004603e+02	7.136746e+01
1.133000e+03	2.498882e+03	4.174122e+02	1.425046e+02	2.133204e+02	2.180727e+02	1.338700e+02	1.593329e+02	5.321828e+01	6.546871e+01	7.703632e+01	1.151768e+02	8.928927e+01	1.240354e+02	9.814784e+01	-8.949567e+01	1.025001e+02	1.155804e+02	8.371090e+01
1.134000e+03	2.660330e+03	4.663496e+02	1.612469e+02	2.423961e+02	2.421403e+02	1.574570e+02	1.791889e+02	6.091113e+01	6.674904e+01	9.449748e+01	1.392779e+02	1.003388e+02	1.420616e+02	1.031225e+02	-1.177576e+02	1.162304e+02	1.259186e+02	9.317710e+01
1.135000e+03	2.827944e+03	4.922453e+02	1.704570e+02	2.612689e+02	2.518484e+02	1.756942e+02	1.939591e+02	6.479524e+01	6.469701e+01	1.057590e+02	1.586850e+02	1.056649e+02	1.556082e+02	1.025880e+02	-1.524244e+02	1.240249e+02	1.278324e+02	9.608583e+01
1.136000e+03	2.996251e+03	4.788833e+02	1.634701e+02	2.595827e+02	2.384254e+02	1.818810e+02	1.978726e+02	6.280130e+01	5.856928e+01	1.048992e+02	1.663332e+02	1.006720e+02	1.589149e+02	9.325325e+01	-1.949744e+02	1.208917e+02	1.175421e+02	8.816159e+01
1.137000e+03	3.167031e+03	4.134631e+02	1.350473e+02	2.284414e+02	1.953538e+02	1.699906e+02	1.857203e+02	5.333721e+01	4.811015e+01	8.693508e+01	1.558826e+02	8.171306e+01	1.467325e+02	7.256230e+01	-2.468186e+02	1.026658e+02	9.269517e+01	6.620006e+01
1.138000e+03	3.351243e+03	2.960554e+02	8.535089e+01	1.662326e+02	1.235907e+02	1.379161e+02	1.559384e+02	3.653666e+01	3.454028e+01	5.080832e+01	1.250248e+02	4.881697e+01	1.174197e+02	4.121081e+01	-3.084079e+02	6.883157e+01	5.476423e+01	3.062570e+01
1.139000e+03	3.568645e+03	1.495158e+02	2.411069e+01	8.473280e+01	3.702420e+01	9.080861e+01	1.138715e+02	1.557976e+01	2.167636e+01	2.431991e+00	7.887064e+01	8.533315e+00	7.620363e+01	5.864752e+00	-3.783251e+02	2.549595e+01	1.153068e+01	-1.183065e+01
1.140000e+03	3.844358e+03	2.522555e+01	-2.697146e+01	1.271697e+01	-3.441342e+01	4.302236e+01	7.376837e+01	-2.543487e+00	1.661328e+01	-4.358698e+01	3.192567e+01	-2.442607e+01	3.714721e+01	-1.920661e+01	-4.528313e+02	-1.283966e+01	-2.157459e+01	-4.658484e+01
1.141000e+03	4.202643e+03	-2.569522e-01	-3.565350e+01	-5.830971e+00	-4.674513e+01	1.718752e+01	5.799611e+01	-7.498431e+00	2.930183e+01	-6.495741e+01	7.159641e+00	-2.815373e+01	2.232689e+01	-1.298912e+01	-5.262436e+02	-2.414723e+01	-2.260225e+01	-5.213550e+01
1.142000e+03	4.659210e+03	1.593836e+02	3.432392e+01	7.936520e+01	4.923302e+01	3.959337e+01	9.256309e+01	1.229937e+01	7.056362e+01	-3.624161e+01	3.133385e+01	2.202529e+01	5.734380e+01	4.803204e+01	-5.922136e+02	1.673001e+01	3.249519e+01	-4.332409e+00
1.143000e+03	5.214125e+03	5.739804e+02	2.121650e+02	3.095901e+02	2.929924e+02	1.323593e+02	1.993201e+02	6.614569e+01	1.486405e+02	6.352273e+01	1.270521e+02	1.460195e+02	1.635740e+02	1.825376e+02	-6.455538e+02	1.304856e+02	1.624959e+02	1.163250e+02
1.144000e+03	5.847454e+03	1.266531e+03	5.072447e+02	6.994132e+02	6.969599e+02	3.044422e+02	3.868326e+02	1.569933e+02	2.651454e+02	2.420975e+02	3.035953e+02	3.502510e+02	3.491646e+02	3.958162e+02	-6.839078e+02	3.244902e+02	3.724563e+02	3.161837e+02
1.145000e+03	6.519164e+03	2.189808e+03	8.993204e+02	1.222973e+03	1.233172e+03	5.447201e+02	6.432151e+02	2.783867e+02	4.119356e+02	4.873830e+02	5.498247e+02	6.209329e+02	6.020410e+02	6.731448e+02	-7.084923e+02	5.858803e+02	6.472771e+02	5.818118e+02
1.146000e+03	7.173741e+03	3.221560e+03	1.336624e+03	1.811004e+03	1.830574e+03	8.204546e+02	9.343785e+02	4.139338e+02	5.705534e+02	7.660681e+02	8.325297e+02	9.226887e+02	8.883157e+02	9.784701e+02	-7.234391e+02	8.799943e+02	9.505648e+02	8.785395e+02
1.147000e+03	7.748720e+03	4.184970e+03	1.744603e+03	2.362466e+03	2.386824e+03	1.082958e+03	1.209697e+03	5.401626e+02	7.152106e+02	1.029390e+03	1.102112e+03	1.204439e+03	1.158026e+03	1.260349e+03	-7.338612e+02	1.156131e+03	1.230678e+03	1.156112e+03
1.148000e+03	8.185278e+03	4.891515e+03	2.044055e+03	2.769116e+03	2.793019e+03	1.279581e+03	1.414321e+03	6.323132e+02	8.189361e+02	1.225116e+03	1.304752e+03	1.411741e+03	1.357373e+03	1.464357e+03	-7.433831e+02	1.359858e+03	1.433148e+03	1.360731e+03
1.149000e+03	8.438393e+03	5.193238e+03	2.173112e+03	2.945551e+03	2.963880e+03	1.368337e+03	1.504387e+03	6.712690e+02	8.610386e+02	1.312070e+03	1.397328e+03	1.501842e+03	1.443707e+03	1.548217e+03	-7.522085e+02	1.448122e+03	1.515747e+03	1.449882e+03
1.150000e+03	8.484203e+03	5.025791e+03	2.105213e+03	2.854014e+03	2.862651e+03	1.329957e+03	1.459735e+03	6.491250e+02	8.331976e+02	1.272013e+03	1.359786e+03	1.456087e+03	1.397925e+03	1.494222e+03	-7.566287e+02	1.401792e+03	1.460850e+03	1.404672e+03
1.151000e+03	8.322985e+03	4.426083e+03	1.856307e+03	2.514664e+03	2.511310e+03	1.172938e+03	1.289384e+03	5.712822e+02	7.418447e+02	1.114459e+03	1.200409e+03	1.285024e+03	1.229639e+03	1.314251e+03	-7.502656e+02	1.230906e+03	1.280398e+03	1.235057e+03
1.152000e+03	7.977483e+03	3.518266e+03	1.478742e+03	1.997747e+03	1.982427e+03	9.299045e+02	1.027880e+03	4.543387e+02	6.059398e+02	8.727989e+02	9.522162e+02	1.024402e+03	9.733441e+02	1.045528e+03	-7.265632e+02	9.707752e+02	1.011648e+03	9.760717e+02
1.153000e+03	7.487569e+03	2.474534e+03	1.044679e+03	1.401343e+03	1.376346e+03	6.470810e+02	7.242864e+02	3.207522e+02	4.511113e+02	5.935647e+02	6.623127e+02	7.239264e+02	6.774178e+02	7.390299e+02	-6.814865e+02	6.707714e+02	7.055717e+02	6.768067e+02
1.154000e+03	6.902950e+03	1.466490e+03	6.257111e+02	8.236794e+02	7.928250e+02	3.711794e+02	4.282697e+02	1.924368e+02	3.024879e+02	3.232201e+02	3.785212e+02	4.332738e+02	3.904080e+02	4.451595e+02	-6.153237e+02	3.803120e+02	4.125116e+02	3.865513e+02
1.155000e+03	6.275635e+03	6.244294e+02	2.759553e+02	3.398865e+02	3.072872e+02	1.383657e+02	1.782639e+02	8.559043e+01	1.787778e+02	9.717444e+01	1.380913e+02	1.903642e+02	1.495261e+02	2.017982e+02	-5.329243e+02	1.370743e+02	1.702121e+02	1.430506e+02
1.156000e+03	5.653419e+03	1.611832e+01	2.338526e+01	-1.023000e+01	-4.154271e+01	-3.161882e+01	-4.916139e+00	8.195600e+00	8.928170e+01	-6.589935e+01	-3.837141e+01	1.518888e+01	-2.541396e+01	2.814575e+01	-4.424009e+02	-3.919486e+01	-2.348169e+00	-3.375289e+01
1.157000e+03	5.075047e+03	-3.527961e+02	-1.298185e+02	-2.221898e+02	-2.512853e+02	-1.356344e+02	-1.183058e+02	-3.964514e+01	3.412648e+01	-1.639478e+02	-1.471710e+02	-9.017425e+01	-1.320098e+02	-7.501351e+01	-3.529263e+02	-1.466173e+02	-1.046678e+02	-1.417856e+02
1.158000e+03	4.567305e+03	-5.225867e+02	-2.004259e+02	-3.178957e+02	-3.462539e+02	-1.831548e+02	-1.724341e+02	-6.341142e+01	6.826118e+00	-2.072547e+02	-1.975349e+02	-1.370154e+02	-1.808737e+02	-1.203548e+02	-2.725011e+02	-1.965321e+02	-1.497210e+02	-1.923048e+02
1.159000e+03	4.144065e+03	-5.567463e+02	-2.147225e+02	-3.329696e+02	-3.639961e+02	-1.905106e+02	-1.849667e+02	-7.116893e+01	-2.234331e+00	-2.124906e+02	-2.058137e+02	-1.435544e+02	-1.894081e+02	-1.271494e+02	-2.064161e+02	-2.069448e+02	-1.570497e+02	-2.033864e+02
1.160000e+03	3.807151e+03	-5.209430e+02	-1.998418e+02	-3.049271e+02	-3.428886e+02	-1.754272e+02	-1.746637e+02	-7.092005e+01	-2.621016e+00	-1.972231e+02	-1.899672e+02	-1.289225e+02	-1.759972e+02	-1.149533e+02	-1.567262e+02	-1.964578e+02	-1.464285e+02	-1.938047e+02
1.161000e+03	3.548749e+03	-4.682357e+02	-1.777139e+02	-2.647536e+02	-3.135415e+02	-1.530095e+02	-1.570097e+02	-6.883978e+01	-1.677985e+00	-1.760381e+02	-1.654998e+02	-1.088747e+02	-1.558713e+02	-9.924723e+01	-1.226362e+02	-1.800364e+02	-1.335021e+02	-1.786926e+02
1.162000e+03	3.354820e+03	-4.316905e+02	-1.620513e+02	-2.325325e+02	-2.946606e+02	-1.334911e+02	-1.419216e+02	-6.848056e+01	-3.531793e+00	-1.585214e+02	-1.431551e+02	-9.357105e+01	-1.389539e+02	-8.937125e+01	-1.014371e+02	-1.669500e+02	-1.277072e+02	-1.673734e+02
1.163000e+03	3.208890e+03	-4.234924e+02	-1.579850e+02	-2.166677e+02	-2.927499e+02	-1.216094e+02	-1.333548e+02	-7.078879e+01	-9.125975e+00	-1.488607e+02	-1.282170e+02	-8.719621e+01	-1.294644e+02	-8.844534e+01	-8.958252e+01	-1.606041e+02	-1.321424e+02	-1.631361e+02
1.164000e+03	3.095461e+03	-4.389073e+02	-1.636881e+02	-2.158525e+02	-3.045799e+02	-1.173146e+02	-1.303845e+02	-7.470968e+01	-1.700595e+01	-1.466835e+02	-1.211270e+02	-8.897811e+01	-1.268681e+02	-9.472111e+01	-8.359248e+01	-1.597515e+02	-1.448254e+02	-1.644651e+02
1.165000e+03	3.002465e+03	-4.632361e+02	-1.732432e+02	-2.228065e+02	-3.212713e+02	-1.174312e+02	-1.292265e+02	-7.814438e+01	-2.452715e+01	-1.487172e+02	-1.190574e+02	-9.509829e+01	-1.277032e+02	-1.037461e+02	-8.062434e+01	-1.605105e+02	-1.607583e+02	-1.671403e+02
1.166000e+03	2.922404e+03	-4.796970e+02	-1.799062e+02	-2.286503e+02	-3.328079e+02	-1.177559e+02	-1.255638e+02	-7.899375e+01	-2.912740e+01	-1.507797e+02	-1.179557e+02	-1.009117e+02	-1.277350e+02	-1.106931e+02	-7.868911e+01	-1.585856e+02	-1.742205e+02	-1.665646e+02
1.167000e+03	2.852179e+03	-4.760769e+02	-1.788522e+02	-2.266790e+02	-3.318023e+02	-1.149613e+02	-1.165053e+02	-7.599967e+01	-2.930855e+01	-1.495442e+02	-1.144560e+02	-1.028515e+02	-1.238256e+02	-1.122231e+02	-7.658765e+01	-1.510863e+02	-1.807145e+02	-1.596711e+02
1.168000e+03	2.791938e+03	-4.483968e+02	-1.686541e+02	-2.145019e+02	-3.155860e+02	-1.077400e+02	-1.016339e+02	-6.914711e+01	-2.506718e+01	-1.435871e+02	-1.070912e+02	-9.950580e+01	-1.149959e+02	-1.074121e+02	-7.369374e+01	-1.374791e+02	-1.781053e+02	-1.459144e+02
1.169000e+03	2.743487e+03	-4.009041e+02	-1.512038e+02	-1.941122e+02	-2.862705e+02	-9.692073e+01	-8.293922e+01	-5.954453e+01	-1.771064e+01	-1.334931e+02	-9.650967e+01	-9.165808e+01	-1.024555e+02	-9.760508e+01	-6.972151e+01	-1.195097e+02	-1.667587e+02	-1.271745e+02
1.170000e+03	2.708811e+03	-3.430779e+02	-1.303872e+02	-1.702543e+02	-2.491454e+02	-8.470786e+01	-6.384933e+01	-4.890216e+01	-9.223623e+00	-1.211633e+02	-8.480145e+01	-8.148389e+01	-8.877332e+01	-8.545636e+01	-6.458177e+01	-1.003028e+02	-1.488395e+02	-1.067939e+02
1.171000e+03	2.689108e+03	-2.853594e+02	-1.102668e+02	-1.480583e+02	-2.103327e+02	-7.352234e+01	-4.788236e+01	-3.887538e+01	-1.504333e+00	-1.087620e+02	-7.437225e+01	-7.139038e+01	-7.667213e+01	-7.369031e+01	-5.836445e+01	-8.312012e+01	-1.272083e+02	-8.824945e+01
1.172000e+03	2.684505e+03	-2.355310e+02	-9.360523e+01	-1.310479e+02	-1.747344e+02	-6.500226e+01	-3.749799e+01	-3.055804e+01	4.204990e+00	-9.780971e+01	-6.691048e+01	-6.304637e+01	-6.800689e+01	-6.414232e+01	-5.140998e+01	-7.030356e+01	-1.044251e+02	-7.400973e+01
1.173000e+03	2.694410e+03	-1.970383e+02	-8.126700e+01	-1.202695e+02	-1.449983e+02	-5.954123e+01	-3.354599e+01	-2.429910e+01	7.500428e+00	-8.876688e+01	-6.285014e+01	-5.696733e+01	-6.330855e+01	-5.742485e+01	-4.438491e+01	-6.276984e+01	-8.222165e+01	-6.496337e+01
1.174000e+03	2.718213e+03	-1.694949e+02	-7.256291e+01	-1.146784e+02	-1.216734e+02	-5.643448e+01	-3.540059e+01	-1.984703e+01	8.612283e+00	-8.117467e+01	-6.144837e+01	-5.271558e+01	-6.197006e+01	-5.323609e+01	-3.827850e+01	-6.013907e+01	-6.152663e+01	-6.051905e+01
1.175000e+03	2.755940e+03	-1.506590e+02	-6.619107e+01	-1.123593e+02	-1.042036e+02	-5.443178e+01	-4.158758e+01	-1.668853e+01	7.976215e+00	-7.416682e+01	-6.132052e+01	-4.950248e+01	-6.286478e+01	-5.104544e+01	-3.428123e+01	-6.132100e+01	-4.287436e+01	-5.921549e+01
1.176000e+03	2.808370e+03	-1.386850e+02	-6.123784e+01	-1.118716e+02	-9.212218e+01	-5.237336e+01	-5.055440e+01	-1.439567e+01	5.811251e+00	-6.704872e+01	-6.112100e+01	-4.684231e+01	-6.503770e+01	-5.075776e+01	-3.356429e+01	-6.522817e+01	-2.688574e+01	-5.952021e+01
1.177000e+03	2.876297e+03	-1.335392e+02	-5.776598e+01	-1.130587e+02	-8.581638e+01	-4.962610e+01	-6.123503e+01	-1.283178e+01	1.904946e+00	-5.967068e+01	-6.005882e+01	-4.493450e+01	-6.813270e+01	-5.300732e+01	-3.701945e+01	-7.127796e+01	-1.453040e+01	-6.047293e+01
1.178000e+03	2.958941e+03	-1.369940e+02	-5.676473e+01	-1.169837e+02	-8.650335e+01	-4.618774e+01	-7.319812e+01	-1.215617e+01	-4.300441e+00	-5.246420e+01	-5.806460e+01	-4.460898e+01	-7.238303e+01	-5.892669e+01	-4.502803e+01	-7.947273e+01	-7.023065e+00	-6.193268e+01
1.179000e+03	3.052044e+03	-1.513466e+02	-5.955303e+01	-1.251006e+02	-9.547437e+01	-4.250512e+01	-8.637796e+01	-1.266734e+01	-1.336414e+01	-4.618896e+01	-5.561291e+01	-4.688617e+01	-7.822214e+01	-6.949511e+01	-5.731196e+01	-9.005961e+01	-5.407686e+00	-6.437663e+01
1.180000e+03	3.146569e+03	-1.776257e+02	-6.697983e+01	-1.381457e+02	-1.130384e+02	-3.917817e+01	-1.005878e+02	-1.459203e+01	-2.540614e+01	-4.157390e+01	-5.336574e+01	-5.238830e+01	-8.576432e+01	-8.478703e+01	-7.289596e+01	-1.029809e+02	-1.005071e+01	-6.839965e+01
1.181000e+03	3.228928e+03	-2.142811e+02	-7.884645e+01	-1.553680e+02	-1.377559e+02	-3.674229e+01	-1.151108e+02	-1.793871e+01	-3.978062e+01	-3.906614e+01	-5.186341e+01	-6.090822e+01	-9.446560e+01	-1.035110e+02	-9.019046e+01	-1.174315e+02	-2.031769e+01	-7.418844e+01
1.182000e+03	3.283204e+03	-2.570669e+02	-9.384082e+01	-1.745191e+02	-1.664016e+02	-3.563240e+01	-1.286051e+02	-2.248430e+01	-5.503197e+01	-3.880916e+01	-5.142018e+01	-7.135694e+01	-1.031669e+02	-1.231046e+02	-1.071886e+02	-1.317783e+02	-3.461639e+01	-8.122932e+01
1.183000e+03	3.294935e+03	-3.001670e+02	-1.099882e+02	-1.926044e+02	-1.947024e+02	-3.628570e+01	-1.393779e+02	-2.787854e+01	-6.918023e+01	-4.080816e+01	-5.222540e+01	-8.210993e+01	-1.104981e+02	-1.403838e+02	-1.217533e+02	-1.438964e+02	-5.079846e+01	-8.836447e+01
1.184000e+03	3.255257e+03	-3.379444e+02	-1.253431e+02	-2.069718e+02	-2.184836e+02	-3.922926e+01	-1.458757e+02	-3.377976e+01	-8.023538e+01	-4.510778e+01	-5.450596e+01	-9.156353e+01	-1.154110e+02	-1.524698e+02	-1.319470e+02	-1.517502e+02	-6.672522e+01	-9.412262e+01
1.185000e+03	3.163831e+03	-3.663903e+02	-1.385308e+02	-2.161435e+02	-2.346631e+02	-4.499626e+01	-1.471336e+02	-3.992015e+01	-8.673725e+01	-5.179327e+01	-5.856480e+01	-9.861060e+01	-1.175348e+02	-1.575819e+02	-1.363359e+02	-1.539266e+02	-8.072763e+01	-9.712494e+01
1.186000e+03	3.029388e+03	-3.835653e+02	-1.488504e+02	-2.199517e+02	-2.416439e+02	-5.382327e+01	-1.429580e+02	-4.604829e+01	-8.810647e+01	-6.074329e+01	-6.459545e+01	-1.028018e+02	-1.171512e+02	-1.553587e+02	-1.341949e+02	-1.498741e+02	-9.176048e+01	-9.636546e+01
1.187000e+03	2.867664e+03	-3.888989e+02	-1.559129e+02	-2.189288e+02	-2.390008e+02	-6.523192e+01	-1.337719e+02	-5.177701e+01	-8.467570e+01	-7.123629e+01	-7.232541e+01	-1.041355e+02	-1.147941e+02	-1.466052e+02	-1.255689e+02	-1.397727e+02	-9.921884e+01	-9.126689e+01
1.188000e+03	2.697508e+03	-3.818103e+02	-1.590417e+02	-2.132938e+02	-2.267132e+02	-7.769878e+01	-1.202210e+02	-5.642802e+01	-7.740811e+01	-8.163231e+01	-8.066718e+01	-1.026129e+02	-1.106812e+02	-1.326278e+02	-1.111898e+02	-1.241514e+02	-1.025530e+02	-8.154606e+01
1.189000e+03	2.536606e+03	-3.604531e+02	-1.567980e+02	-2.020884e+02	-2.044022e+02	-8.861660e+01	-1.027506e+02	-5.897731e+01	-6.744321e+01	-8.935333e+01	-8.758889e+01	-9.781972e+01	-1.042686e+02	-1.145001e+02	-9.230552e+01	-1.034845e+02	-1.009100e+02	-6.701863e+01
1.190000e+03	2.398218e+03	-3.213459e+02	-1.469557e+02	-1.829649e+02	-1.710152e+02	-9.465723e+01	-8.137701e+01	-5.816835e+01	-5.568076e+01	-9.127333e+01	-9.035069e+01	-8.878609e+01	-9.417832e+01	-9.261437e+01	-7.048894e+01	-7.799052e+01	-9.301852e+01	-4.749643e+01
1.191000e+03	2.289734e+03	-2.602845e+02	-1.270594e+02	-1.528556e+02	-1.251913e+02	-9.250772e+01	-5.579367e+01	-5.279517e+01	-4.259077e+01	-8.446704e+01	-8.612068e+01	-7.426278e+01	-7.859192e+01	-6.673469e+01	-4.747852e+01	-4.775058e+01	-7.743634e+01	-2.288189e+01
1.192000e+03	2.213040e+03	-1.743658e+02	-9.544146e+01	-1.093608e+02	-6.623489e+01	-7.981048e+01	-2.579998e+01	-4.208902e+01	-2.832356e+01	-6.711644e+01	-7.283037e+01	-5.335088e+01	-5.600883e+01	-3.653006e+01	-2.504524e+01	-1.310365e+01	-5.312881e+01	6.539930e+00
1.193000e+03	2.166027e+03	-6.438186e+01	-5.232465e+01	-5.232937e+01	4.688411e+00	-5.603283e+01	8.124678e+00	-2.609080e+01	-1.303862e+01	-3.928471e+01	-5.000284e+01	-2.623225e+01	-2.609592e+01	-2.326095e+00	-4.846776e+00	2.487503e+01	-2.018605e+01	3.973282e+01
1.194000e+03	2.144381e+03	6.348923e+01	-5.190539e-01	1.507855e+01	8.369920e+01	-2.295938e+01	4.438354e+01	-5.871360e+00	2.749708e+00	-3.267591e+00	-1.923817e+01	5.353847e+00	9.725796e+00	3.431702e+01	1.176546e+01	6.407750e+01	1.962057e+01	7.466938e+01
1.195000e+03	2.142984e+03	1.976503e+02	5.468700e+01	8.642380e+01	1.642023e+02	1.542273e+01	8.022182e+01	1.650839e+01	1.802652e+01	3.666152e+01	1.588424e+01	3.817997e+01	4.824464e+01	7.053961e+01	2.397113e+01	1.014627e+02	6.273700e+01	1.084110e+02
1.196000e+03	2.156698e+03	3.230537e+02	1.065405e+02	1.532690e+02	2.379271e+02	5.368735e+01	1.121812e+02	3.832716e+01	3.144093e+01	7.510047e+01	5.052997e+01	6.821434e+01	8.505505e+01	1.027388e+02	3.166536e+01	1.335963e+02	1.043271e+02	1.375739e+02
1.197000e+03	2.180718e+03	4.246570e+02	1.484483e+02	2.073123e+02	2.967526e+02	8.618611e+01	1.369185e+02	5.674743e+01	4.171988e+01	1.067293e+02	7.975903e+01	9.170150e+01	1.156106e+02	1.275527e+02	3.550913e+01	1.574635e+02	1.392846e+02	1.590644e+02
1.198000e+03	2.210836e+03	4.911781e+02	1.756400e+02	2.425929e+02	3.347024e+02	1.083448e+02	1.520854e+02	6.941603e+01	4.813193e+01	1.275089e+02	9.972404e+01	1.062241e+02	1.363678e+02	1.428679e+02	3.678616e+01	1.712510e+02	1.634465e+02	1.708270e+02
1.199000e+03	2.243841e+03	5.178395e+02	1.862788e+02	2.569709e+02	3.494220e+02	1.176411e+02	1.569420e+02	7.494367e+01	5.077663e+01	1.355030e+02	1.085303e+02	1.113349e+02	1.456343e+02	1.484391e+02	3.707892e+01	1.748052e+02	1.746118e+02	1.723408e+02
1.200000e+03	2.277977e+03	5.072582e+02	1.816872e+02	2.524327e+02	3.426831e+02	1.140032e+02	1.525148e+02	7.313821e+01	5.057094e+01	1.311170e+02	1.065256e+02	1.085483e+02	1.438817e+02	1.459050e+02	3.784653e+01	1.696297e+02	1.730488e+02	1.647175e+02
1.201000e+03	2.313179e+03	4.684083e+02	1.657279e+02	2.342776e+02	3.198528e+02	9.959604e+01	1.413044e+02	6.495943e+01	4.895710e+01	1.167714e+02	9.601632e+01	1.007673e+02	1.335065e+02	1.382585e+02	4.002193e+01	1.584804e+02	1.613683e+02	1.504241e+02
1.202000e+03	2.350858e+03	4.142311e+02	1.436729e+02	2.096239e+02	2.885974e+02	7.815287e+01	1.266992e+02	5.224640e+01	4.747684e+01	9.619647e+01	8.058767e+01	9.142511e+01	1.181939e+02	1.290327e+02	4.373549e+01	1.447431e+02	1.438510e+02	1.327671e+02
1.203000e+03	2.393221e+03	3.587162e+02	1.209737e+02	1.857721e+02	2.572327e+02	5.409367e+01	1.122912e+02	3.731013e+01	4.738412e+01	7.358976e+01	6.426672e+01	8.366194e+01	1.021040e+02	1.215009e+02	4.823271e+01	1.317872e+02	1.254431e+02	1.152917e+02
1.204000e+03	2.442480e+03	3.141424e+02	1.022293e+02	1.688107e+02	2.330828e+02	3.164560e+01	1.012313e+02	2.248232e+01	4.940677e+01	5.282257e+01	5.072008e+01	7.974527e+01	8.905809e+01	1.180852e+02	5.200604e+01	1.224078e+02	1.106734e+02	1.011910e+02
1.205000e+03	2.500384e+03	2.888719e+02	9.046495e+01	1.626126e+02	2.210936e+02	1.410011e+01	9.569043e+01	9.691576e+00	5.366959e+01	3.679521e+01	4.259445e+01	8.077161e+01	8.183259e+01	1.200120e+02	5.311751e+01	1.183848e+02	1.027081e+02	9.276549e+01
1.206000e+03	2.568290e+03	2.858720e+02	8.670470e+01	1.682170e+02	2.228614e+02	3.280129e+00	9.645803e+01	1.249782e-01	5.972104e+01	2.698340e+01	4.105309e+01	8.657797e+01	8.162990e+01	1.271573e+02	4.964917e+01	1.201603e+02	1.027010e+02	9.096923e+01
1.207000e+03	2.647619e+03	3.020906e+02	8.981364e+01	1.835865e+02	2.362153e+02	-7.326228e-01	1.027252e+02	-5.968417e+00	6.659803e+01	2.321529e+01	4.555274e+01	9.578035e+01	8.779640e+01	1.380268e+02	4.018110e+01	1.266719e+02	1.095437e+02	9.512649e+01
1.208000e+03	2.740220e+03	3.288346e+02	9.663609e+01	2.037955e+02	2.554855e+02	4.342922e-01	1.121262e+02	-9.283026e+00	7.290497e+01	2.373078e+01	5.391118e+01	1.059175e+02	9.786794e+01	1.498772e+02	2.417051e+01	1.354213e+02	1.200646e+02	1.029337e+02
1.209000e+03	2.848185e+03	3.532376e+02	1.024842e+02	2.217352e+02	2.725021e+02	3.793253e+00	1.210911e+02	-1.125346e+01	7.693289e+01	2.555095e+01	6.268872e+01	1.137360e+02	1.079888e+02	1.590394e+02	2.111578e+00	1.428473e+02	1.296553e+02	1.108285e+02
1.210000e+03	2.972993e+03	3.606732e+02	1.019682e+02	2.293192e+02	2.781996e+02	5.605441e+00	1.254855e+02	-1.368218e+01	7.685943e+01	2.510848e+01	6.783352e+01	1.156488e+02	1.136599e+02	1.614785e+02	-2.458874e+01	1.449872e+02	1.332132e+02	1.146939e+02
1.211000e+03	3.114281e+03	3.376534e+02	9.003708e+01	2.189999e+02	2.644900e+02	2.113696e+00	1.214075e+02	-1.829522e+01	7.104169e+01	1.899514e+01	6.545429e+01	1.083307e+02	1.106583e+02	1.535382e+02	-5.398286e+01	1.382877e+02	1.262034e+02	1.107296e+02
1.212000e+03	3.268786e+03	2.745559e+02	6.300009e+01	1.852622e+02	2.259517e+02	-9.766423e+00	1.059469e+02	-2.634608e+01	5.836315e+01	4.636761e+00	5.254284e+01	8.934456e+01	9.590653e+01	1.327117e+02	-8.405858e+01	1.203490e+02	1.056043e+02	9.624542e+01
1.213000e+03	3.429898e+03	1.675856e+02	1.930897e+01	1.257641e+02	1.609364e+02	-3.191748e+01	7.773487e+01	-3.835812e+01	3.855932e+01	-1.925045e+01	2.750728e+01	5.766546e+01	6.808716e+01	9.824882e+01	-1.131180e+02	9.040103e+01	7.053793e+01	7.016994e+01
1.214000e+03	3.587985e+03	1.968260e+01	-4.001516e+01	4.193614e+01	7.191329e+01	-6.468198e+01	3.720280e+01	-5.403177e+01	1.244375e+01	-5.245888e+01	-9.529720e+00	1.401499e+01	2.790954e+01	5.145767e+01	-1.398956e+02	4.942517e+01	2.249168e+01	3.319675e+01
1.215000e+03	3.731384e+03	-1.595666e+02	-1.113031e+02	-6.095805e+01	-3.487417e+01	-1.066785e+02	-1.342087e+01	-7.228520e+01	-1.802196e+01	-9.328090e+01	-5.663135e+01	-3.901943e+01	-2.195018e+01	-4.334917e+00	-1.633812e+02	-2.397152e-02	-3.484567e+01	-1.236140e+01
1.216000e+03	3.847813e+03	-3.547876e+02	-1.884534e+02	-1.742071e+02	-1.502046e+02	-1.547483e+02	-7.029819e+01	-9.138156e+01	-4.984320e+01	-1.386096e+02	-1.100992e+02	-9.707310e+01	-7.714509e+01	-6.411583e+01	-1.824750e+02	-5.416016e+01	-9.603915e+01	-6.286992e+01
1.217000e+03	3.926034e+03	-5.462902e+02	-2.634341e+02	-2.864186e+02	-2.629110e+02	-2.040851e+02	-1.283020e+02	-1.091209e+02	-7.930305e+01	-1.841302e+02	-1.646908e+02	-1.543142e+02	-1.321147e+02	-1.217350e+02	-1.957051e+02	-1.083479e+02	-1.545574e+02	-1.137167e+02
1.218000e+03	3.957611e+03	-7.121705e+02	-3.271297e+02	-3.846988e+02	-3.610602e+02	-2.486596e+02	-1.814842e+02	-1.231073e+02	-1.024597e+02	-2.246688e+02	-2.140837e+02	-2.040229e+02	-1.806851e+02	-1.706214e+02	-2.012283e+02	-1.574942e+02	-2.035606e+02	-1.597010e+02
1.219000e+03	3.938529e+03	-8.311093e+02	-3.705766e+02	-4.562926e+02	-4.333063e+02	-2.820242e+02	-2.237430e+02	-1.311031e+02	-1.157875e+02	-2.547875e+02	-2.516611e+02	-2.394733e+02	-2.168270e+02	-2.046367e+02	-1.971944e+02	-1.965071e+02	-2.367945e+02	-1.955444e+02
1.220000e+03	3.870327e+03	-8.857355e+02	-3.865048e+02	-4.906109e+02	-4.704358e+02	-2.984420e+02	-2.497023e+02	-1.314428e+02	-1.168653e+02	-2.696376e+02	-2.715959e+02	-2.550612e+02	-2.355559e+02	-2.190190e+02	-1.823737e+02	-2.208985e+02	-2.495339e+02	-2.165909e+02
1.221000e+03	3.760334e+03	-8.660623e+02	-3.709114e+02	-4.813460e+02	-4.669816e+02	-2.941201e+02	-2.557080e+02	-1.234239e+02	-1.049666e+02	-2.659427e+02	-2.700509e+02	-2.474861e+02	-2.338646e+02	-2.112980e+02	-1.568019e+02	-2.275310e+02	-2.394488e+02	-2.196556e+02
1.222000e+03	3.620774e+03	-7.721870e+02	-3.242568e+02	-4.281796e+02	-4.225883e+02	-2.682139e+02	-2.407294e+02	-1.075646e+02	-8.138841e+01	-2.428661e+02	-2.461923e+02	-2.166902e+02	-2.114928e+02	-1.819894e+02	-1.221681e+02	-2.153816e+02	-2.072066e+02	-2.038421e+02
1.223000e+03	3.466858e+03	-6.153801e+02	-2.518825e+02	-3.375344e+02	-3.426960e+02	-2.232910e+02	-2.068883e+02	-8.563588e+01	-4.939408e+01	-2.024862e+02	-2.026909e+02	-1.662443e+02	-1.712925e+02	-1.348449e+02	-8.176587e+01	-1.860832e+02	-1.566146e+02	-1.710526e+02
1.224000e+03	3.314262e+03	-4.169439e+02	-1.634048e+02	-2.219681e+02	-2.381445e+02	-1.650678e+02	-1.593728e+02	-6.042815e+01	-1.372949e+01	-1.496733e+02	-1.454878e+02	-1.029742e+02	-1.189956e+02	-7.648134e+01	-3.998673e+01	-1.439775e+02	-9.417045e+01	-1.259340e+02
1.225000e+03	3.176637e+03	-2.047329e+02	-7.109237e+01	-9.811861e+01	-1.235254e+02	-1.014244e+02	-1.056246e+02	-3.528289e+01	2.022186e+01	-9.131231e+01	-8.278207e+01	-3.580693e+01	-6.231269e+01	-1.533727e+01	-1.491651e+00	-9.551154e+01	-2.801863e+01	-7.514102e+01
1.226000e+03	3.063683e+03	-7.866926e+00	1.249096e+01	1.649223e+01	-1.446035e+01	-4.088109e+01	-5.389710e+01	-1.347105e+01	4.748211e+01	-3.498939e+01	-2.341447e+01	2.596448e+01	-9.472780e+00	3.990618e+01	2.970787e+01	-4.800409e+01	3.353814e+01	-2.601156e+01
1.227000e+03	2.980215e+03	1.492375e+02	7.706390e+01	1.071067e+02	7.562626e+01	9.129093e+00	-1.149450e+01	2.457511e+00	6.449189e+01	1.257360e+01	2.499275e+01	7.460870e+01	3.249800e+01	8.211376e+01	5.101535e+01	-8.048431e+00	8.366870e+01	1.503058e+01
1.228000e+03	2.926372e+03	2.520060e+02	1.167863e+02	1.648962e+02	1.383918e+02	4.378027e+01	1.683539e+01	1.120678e+01	6.984520e+01	4.694253e+01	5.766462e+01	1.055816e+02	5.931513e+01	1.072318e+02	6.167204e+01	1.999940e+01	1.183864e+02	4.389543e+01
1.229000e+03	2.898881e+03	2.985232e+02	1.313881e+02	1.887139e+02	1.722326e+02	6.176155e+01	2.986947e+01	1.300387e+01	6.454134e+01	6.684814e+01	7.360773e+01	1.183861e+02	7.032903e+01	1.151070e+02	6.274703e+01	3.495798e+01	1.372687e+02	5.962590e+01
1.230000e+03	2.892974e+03	2.990655e+02	1.258911e+02	1.848410e+02	1.821196e+02	6.529906e+01	2.991041e+01	9.503277e+00	5.165991e+01	7.423251e+01	7.554834e+01	1.163896e+02	6.845345e+01	1.092943e+02	5.672048e+01	3.884592e+01	1.432676e+02	6.430621e+01
1.231000e+03	2.904317e+03	2.723621e+02	1.089470e+02	1.647312e+02	1.775886e+02	5.926062e+01	2.180156e+01	3.318901e+00	3.552663e+01	7.342162e+01	6.886510e+01	1.056298e+02	5.910434e+01	9.586863e+01	4.679109e+01	3.596480e+01	1.416173e+02	6.210159e+01
1.232000e+03	2.930204e+03	2.397038e+02	9.027169e+01	1.414415e+02	1.695158e+02	4.960067e+01	1.128378e+01	-2.700992e+00	2.060209e+01	6.967073e+01	5.983878e+01	9.297433e+01	4.847103e+01	8.160621e+01	3.610505e+01	3.135627e+01	1.381520e+02	5.775815e+01
1.233000e+03	2.969587e+03	2.188034e+02	7.797278e+01	1.259022e+02	1.667704e+02	4.162829e+01	3.260001e+00	-6.240202e+00	1.042082e+01	6.755292e+01	5.378308e+01	8.421464e+01	4.169235e+01	7.212361e+01	2.710960e+01	2.918729e+01	1.375738e+02	5.508911e+01
1.234000e+03	3.022003e+03	2.193793e+02	7.659813e+01	1.242183e+02	1.738766e+02	3.863664e+01	5.482392e-01	-6.082068e+00	6.883895e+00	6.971495e+01	5.365748e+01	8.268189e+01	4.154217e+01	7.056634e+01	2.117588e+01	3.162948e+01	1.422356e+02	5.596701e+01
1.235000e+03	3.086091e+03	2.417119e+02	8.643619e+01	1.367528e+02	1.903839e+02	4.128389e+01	3.478703e+00	-2.310728e+00	1.006392e+01	7.637267e+01	5.956593e+01	8.874862e+01	4.801102e+01	7.719355e+01	1.853675e+01	3.857069e+01	1.517992e+02	6.012174e+01
1.236000e+03	3.158604e+03	2.781975e+02	1.041021e+02	1.590155e+02	2.119166e+02	4.782011e+01	1.032764e+01	3.877915e+00	1.848255e+01	8.561957e+01	6.919079e+01	1.002259e+02	5.879760e+01	8.983256e+01	1.848664e+01	4.813057e+01	1.637695e+02	6.570001e+01
1.237000e+03	3.234577e+03	3.167795e+02	1.239708e+02	1.836979e+02	2.321978e+02	5.494316e+01	1.825089e+01	1.063308e+01	2.966179e+01	9.430862e+01	7.885645e+01	1.133393e+02	7.036780e+01	1.048506e+02	1.972985e+01	5.762004e+01	1.745591e+02	7.022990e+01
1.238000e+03	3.308634e+03	3.445954e+02	1.397887e+02	2.028763e+02	2.450373e+02	5.887766e+01	2.423941e+01	1.597246e+01	4.070486e+01	9.908305e+01	8.472190e+01	1.238177e+02	7.906894e+01	1.181647e+02	2.075634e+01	6.444860e+01	1.805684e+02	7.150345e+01
1.239000e+03	3.376793e+03	3.504949e+02	1.459029e+02	2.095753e+02	2.454950e+02	5.628314e+01	2.572574e+01	1.819417e+01	4.874168e+01	9.716013e+01	8.365239e+01	1.277100e+02	8.187662e+01	1.259344e+02	2.015838e+01	6.660650e+01	1.788671e+02	6.800894e+01
1.240000e+03	3.437866e+03	3.260309e+02	1.379112e+02	1.984352e+02	2.300479e+02	4.478787e+01	2.075286e+01	1.610466e+01	5.122036e+01	8.668949e+01	7.357834e+01	1.218076e+02	7.663941e+01	1.248689e+02	1.684925e+01	6.265810e+01	1.673677e+02	5.884971e+01
1.241000e+03	3.493787e+03	2.655529e+02	1.129329e+02	1.658164e+02	1.962369e+02	2.319546e+01	7.907792e+00	9.109476e+00	4.614608e+01	6.678528e+01	5.346731e+01	1.038242e+02	6.200395e+01	1.123613e+02	1.018269e+01	5.150095e+01	1.447131e+02	4.340999e+01
1.242000e+03	3.548755e+03	1.664965e+02	6.989036e+01	1.099702e+02	1.425651e+02	-8.428528e+00	-1.365163e+01	-2.727213e+00	3.238614e+01	3.750259e+01	2.322756e+01	7.261813e+01	3.736307e+01	8.675427e+01	-1.238793e-02	3.228243e+01	1.102590e+02	2.117906e+01
1.243000e+03	3.607620e+03	3.058457e+01	1.004469e+01	3.169925e+01	6.916341e+01	-4.861216e+01	-4.386627e+01	-1.858774e+01	1.006061e+01	-1.755873e-02	-1.618567e+01	2.863278e+01	3.075970e+00	4.789519e+01	-1.347184e+01	4.730790e+00	6.440766e+01	-7.979364e+00
1.244000e+03	3.674175e+03	-1.343665e+02	-6.236281e+01	-6.463561e+01	-2.092906e+01	-9.429077e+01	-8.122416e+01	-3.681242e+01	-1.911785e+01	-4.324657e+01	-6.244678e+01	-2.555021e+01	-3.907786e+01	-2.180455e+00	-2.961209e+01	-3.017804e+01	9.222424e+00	-4.316476e+01
1.245000e+03	3.749962e+03	-3.133233e+02	-1.398842e+02	-1.704770e+02	-1.206828e+02	-1.408124e+02	-1.223516e+02	-5.495663e+01	-5.179734e+01	-8.808841e+01	-1.116008e+02	-8.492754e+01	-8.554408e+01	-5.887006e+01	-4.772787e+01	-6.962625e+01	-5.108496e+01	-8.178659e+01
1.246000e+03	3.833899e+03	-4.851173e+02	-2.126381e+02	-2.736711e+02	-2.192089e+02	-1.824336e+02	-1.621805e+02	-7.013501e+01	-8.344230e+01	-1.291972e+02	-1.582719e+02	-1.425031e+02	-1.311647e+02	-1.153954e+02	-6.726007e+01	-1.089434e+02	-1.102957e+02	-1.194530e+02
1.247000e+03	3.922698e+03	-6.264418e+02	-2.703016e+02	-3.607305e+02	-3.036642e+02	-2.134299e+02	-1.949076e+02	-7.967554e+01	-1.093137e+02	-1.609891e+02	-1.965792e+02	-1.906260e+02	-1.701029e+02	-1.641495e+02	-8.807947e+01	-1.424666e+02	-1.612291e+02	-1.507319e+02
1.248000e+03	4.011739e+03	-7.179647e+02	-3.049012e+02	-4.203293e+02	-3.625905e+02	-2.296023e+02	-2.155500e+02	-8.192183e+01	-1.257372e+02	-1.791651e+02	-2.216178e+02	-2.229793e+02	-1.973494e+02	-1.987110e+02	-1.106804e+02	-1.651131e+02	-1.975096e+02	-1.706678e+02
1.249000e+03	4.095964e+03	-7.504028e+02	-3.134210e+02	-4.468100e+02	-3.894924e+02	-2.296514e+02	-2.215355e+02	-7.688154e+01	-1.312244e+02	-1.821974e+02	-2.309860e+02	-2.365393e+02	-2.102704e+02	-2.158243e+02	-1.361558e+02	-1.740822e+02	-2.154422e+02	-1.764941e+02
1.250000e+03	4.170512e+03	-7.280045e+02	-2.991134e+02	-4.422308e+02	-3.851529e+02	-2.158208e+02	-2.136543e+02	-6.641623e+01	-1.269974e+02	-1.721165e+02	-2.257003e+02	-2.326969e+02	-2.095333e+02	-2.165308e+02	-1.658651e+02	-1.699513e+02	-2.152326e+02	-1.687955e+02
1.251000e+03	4.231084e+03	-6.677461e+02	-2.708102e+02	-4.159549e+02	-3.576197e+02	-1.934439e+02	-1.959270e+02	-5.382356e+01	-1.166511e+02	-1.541593e+02	-2.100411e+02	-2.169862e+02	-1.989671e+02	-2.059136e+02	-2.008236e+02	-1.566439e+02	-2.010047e+02	-1.515635e+02
1.252000e+03	4.274329e+03	-5.942703e+02	-2.403200e+02	-3.817701e+02	-3.197553e+02	-1.694715e+02	-1.743875e+02	-4.290493e+01	-1.050150e+02	-1.353052e+02	-1.903107e+02	-1.974146e+02	-1.843528e+02	-1.914583e+02	-2.409823e+02	-1.402230e+02	-1.795584e+02	-1.310555e+02
1.253000e+03	4.298506e+03	-5.323342e+02	-2.187820e+02	-3.535423e+02	-2.852502e+02	-1.504741e+02	-1.552293e+02	-3.682627e+01	-9.658485e+01	-1.221971e+02	-1.729459e+02	-1.819553e+02	-1.715834e+02	-1.805945e+02	-2.846699e+02	-1.269542e+02	-1.583185e+02	-1.138740e+02
1.254000e+03	4.304334e+03	-4.994874e+02	-2.132639e+02	-3.409761e+02	-2.645791e+02	-1.408189e+02	-1.429920e+02	-3.716705e+01	-9.406806e+01	-1.191957e+02	-1.626711e+02	-1.760965e+02	-1.648754e+02	-1.783024e+02	-3.284595e+02	-1.213708e+02	-1.432270e+02	-1.049925e+02
1.255000e+03	4.295512e+03	-5.015040e+02	-2.247828e+02	-3.469621e+02	-2.623189e+02	-1.416226e+02	-1.394136e+02	-4.348192e+01	-9.754482e+01	-1.272380e+02	-1.613286e+02	-1.813008e+02	-1.656570e+02	-1.856305e+02	-3.675916e+02	-1.250308e+02	-1.373027e+02	-1.064343e+02
1.256000e+03	4.278239e+03	-5.319287e+02	-2.483606e+02	-3.673198e+02	-2.766263e+02	-1.507662e+02	-1.432763e+02	-5.350964e+01	-1.045217e+02	-1.438389e+02	-1.677176e+02	-1.948511e+02	-1.724649e+02	-1.995994e+02	-3.968877e+02	-1.363507e+02	-1.402865e+02	-1.170168e+02
1.257000e+03	4.259510e+03	-5.755452e+02	-2.749757e+02	-3.928371e+02	-3.008332e+02	-1.638667e+02	-1.512016e+02	-6.393813e+01	-1.108336e+02	-1.641423e+02	-1.783832e+02	-2.110381e+02	-1.817964e+02	-2.144518e+02	-4.119085e+02	-1.514786e+02	-1.493620e+02	-1.331482e+02
1.258000e+03	4.244796e+03	-6.142731e+02	-2.946478e+02	-4.127351e+02	-3.263932e+02	-1.758103e+02	-1.590370e+02	-7.145846e+01	-1.120600e+02	-1.825880e+02	-1.889910e+02	-2.231902e+02	-1.895441e+02	-2.237431e+02	-4.100253e+02	-1.658156e+02	-1.605820e+02	-1.503001e+02
1.259000e+03	4.236513e+03	-6.334099e+02	-2.996028e+02	-4.183296e+02	-3.460879e+02	-1.823456e+02	-1.633440e+02	-7.377217e+01	-1.049680e+02	-1.946350e+02	-1.957956e+02	-2.258319e+02	-1.924990e+02	-2.225345e+02	-3.911033e+02	-1.756339e+02	-1.704560e+02	-1.646118e+02
1.260000e+03	4.234670e+03	-6.263426e+02	-2.865792e+02	-4.057765e+02	-3.565031e+02	-1.813142e+02	-1.625471e+02	-7.026589e+01	-8.851723e+01	-1.980622e+02	-1.967847e+02	-2.163149e+02	-1.894652e+02	-2.089939e+02	-3.576250e+02	-1.792952e+02	-1.772084e+02	-1.741327e+02
1.261000e+03	4.240191e+03	-5.966427e+02	-2.577341e+02	-3.772541e+02	-3.592023e+02	-1.732867e+02	-1.574844e+02	-6.220285e+01	-6.414543e+01	-1.935888e+02	-1.922717e+02	-1.955330e+02	-1.817270e+02	-1.849863e+02	-3.142444e+02	-1.777863e+02	-1.814154e+02	-1.794191e+02
1.262000e+03	4.259834e+03	-5.573924e+02	-2.200973e+02	-3.405008e+02	-3.605061e+02	-1.615632e+02	-1.513166e+02	-5.243955e+01	-3.531393e+01	-1.847834e+02	-1.849100e+02	-1.676597e+02	-1.728489e+02	-1.555963e+02	-2.669113e+02	-1.745365e+02	-1.859686e+02	-1.834439e+02
1.263000e+03	4.310206e+03	-5.282937e+02	-1.839032e+02	-3.070585e+02	-3.701352e+02	-1.516232e+02	-1.489056e+02	-4.479541e+01	-6.525164e+00	-1.773780e+02	-1.792289e+02	-1.391097e+02	-1.679582e+02	-1.278366e+02	-2.217926e+02	-1.746602e+02	-1.954741e+02	-1.909468e+02
1.264000e+03	4.418031e+03	-5.313930e+02	-1.602983e+02	-2.897571e+02	-3.990966e+02	-1.501304e+02	-1.558276e+02	-4.324815e+01	1.784518e+01	-1.781435e+02	-1.808080e+02	-1.170522e+02	-1.727156e+02	-1.089573e+02	-1.842385e+02	-1.838407e+02	-2.152553e+02	-2.074090e+02
1.265000e+03	4.614899e+03	-5.862112e+02	-1.589081e+02	-2.999445e+02	-4.571682e+02	-1.635967e+02	-1.771758e+02	-5.110641e+01	3.456556e+01	-1.934739e+02	-1.951797e+02	-1.078039e+02	-1.921521e+02	-1.047739e+02	-1.579917e+02	-2.070535e+02	-2.501146e+02	-2.378127e+02
1.266000e+03	4.927034e+03	-7.049419e+02	-1.856393e+02	-3.448609e+02	-5.502987e+02	-1.968242e+02	-2.162884e+02	-7.026471e+01	4.219337e+01	-2.278333e+02	-2.265413e+02	-1.153770e+02	-2.294956e+02	-1.183290e+02	-1.447523e+02	-2.472985e+02	-3.030006e+02	-2.853261e+02
1.267000e+03	5.363178e+03	-8.883768e+02	-2.410127e+02	-4.254988e+02	-6.783001e+02	-2.513438e+02	-2.735701e+02	-1.006187e+02	4.127915e+01	-2.822930e+02	-2.764277e+02	-1.403968e+02	-2.851137e+02	-1.490805e+02	-1.441135e+02	-3.045210e+02	-3.737798e+02	-3.500958e+02
1.268000e+03	5.905300e+03	-1.123371e+03	-3.193020e+02	-5.353273e+02	-8.333440e+02	-3.242047e+02	-3.456556e+02	-1.397284e+02	3.418893e+01	-3.534927e+02	-3.426283e+02	-1.795770e+02	-3.557616e+02	-1.927081e+02	-1.538089e+02	-3.749461e+02	-4.583988e+02	-4.284096e+02
1.269000e+03	6.506572e+03	-1.382759e+03	-4.087505e+02	-6.603019e+02	-9.998545e+02	-4.075572e+02	-4.252251e+02	-1.828404e+02	2.466179e+01	-4.334149e+02	-4.187326e+02	-2.259142e+02	-4.343983e+02	-2.415777e+02	-1.701788e+02	-4.510859e+02	-5.487697e+02	-5.125585e+02
1.270000e+03	7.098787e+03	-1.628440e+03	-4.930529e+02	-7.805017e+02	-1.156251e+03	-4.893949e+02	-5.017401e+02	-2.233716e+02	1.721312e+01	-5.102693e+02	-4.946584e+02	-2.696860e+02	-5.108256e+02	-2.858511e+02	-1.887694e+02	-5.226183e+02	-6.336339e+02	-5.916597e+02
1.271000e+03	7.607924e+03	-1.817652e+03	-5.540524e+02	-8.734235e+02	-1.278563e+03	-5.555457e+02	-5.631668e+02	-2.538781e+02	1.646163e+01	-5.705181e+02	-5.582953e+02	-3.001797e+02	-5.732529e+02	-3.151351e+02	-2.050026e+02	-5.781434e+02	-7.004214e+02	-6.534846e+02
1.272000e+03	7.973406e+03	-1.911471e+03	-5.752407e+02	-9.184507e+02	-1.345324e+03	-5.925866e+02	-5.984320e+02	-2.673906e+02	2.644155e+01	-6.016869e+02	-5.980279e+02	-3.078560e+02	-6.106031e+02	-3.204292e+02	-2.148690e+02	-6.075369e+02	-7.377887e+02	-6.869961e+02
1.273000e+03	8.165090e+03	-1.883558e+03	-5.452895e+02	-9.014971e+02	-1.342572e+03	-5.909662e+02	-6.000342e+02	-2.588454e+02	4.997881e+01	-5.952733e+02	-6.055268e+02	-2.864503e+02	-6.150546e+02	-2.959762e+02	-2.155851e+02	-6.043460e+02	-7.382278e+02	-6.849855e+02
1.274000e+03	8.192826e+03	-1.726762e+03	-4.606795e+02	-8.185451e+02	-1.267565e+03	-5.474401e+02	-5.660605e+02	-2.262467e+02	8.823872e+01	-5.489232e+02	-5.779932e+02	-2.344390e+02	-5.841135e+02	-2.405576e+02	-2.061164e+02	-5.675483e+02	-7.000191e+02	-6.460556e+02
1.275000e+03	8.105879e+03	-1.455531e+03	-3.266491e+02	-6.769672e+02	-1.130028e+03	-4.660620e+02	-5.009491e+02	-1.712279e+02	1.405524e+02	-4.672060e+02	-5.191237e+02	-1.554270e+02	-5.215476e+02	-1.578494e+02	-1.874382e+02	-5.020978e+02	-6.279340e+02	-5.753094e+02
1.276000e+03	7.982488e+03	-1.103238e+03	-1.561416e+02	-4.941131e+02	-9.504278e+02	-3.573902e+02	-4.146773e+02	-9.882585e+01	2.045714e+02	-3.607169e+02	-4.384239e+02	-5.732129e+01	-4.367994e+02	-5.569548e+01	-1.624077e+02	-4.180084e+02	-5.324235e+02	-4.834524e+02
1.277000e+03	7.912107e+03	-7.149926e+02	3.297234e+01	-2.934625e+02	-7.555903e+02	-2.361120e+02	-3.205267e+02	-1.650549e+01	2.766997e+02	-2.437301e+02	-3.490043e+02	4.947287e+01	-3.429437e+02	5.553496e+01	-1.351918e+02	-3.281490e+02	-4.274459e+02	-3.844740e+02
1.278000e+03	7.974188e+03	-3.378190e+02	2.216262e+02	-9.937519e+01	-5.727488e+02	-1.177446e+02	-2.320051e+02	6.731199e+01	3.526642e+02	-1.310395e+02	-2.644550e+02	1.543098e+02	-2.536942e+02	1.650722e+02	-1.103093e+02	-2.453037e+02	-3.274502e+02	-2.924847e+02
1.279000e+03	8.217852e+03	-1.074428e+01	3.932415e+02	6.815581e+01	-4.235041e+02	-1.530782e+01	-1.597532e+02	1.448363e+02	4.280577e+02	-3.481626e+01	-1.956544e+02	2.484015e+02	-1.802559e+02	2.638020e+02	-9.148250e+01	-1.792648e+02	-2.442446e+02	-2.185200e+02
1.280000e+03	8.646967e+03	2.426992e+02	5.364655e+02	1.973971e+02	-3.192373e+02	6.318191e+01	-1.092595e+02	2.102114e+02	4.987456e+02	3.772119e+01	-1.483711e+02	3.262509e+02	-1.288650e+02	3.457595e+02	-8.059007e+01	-1.347227e+02	-1.845200e+02	-1.681467e+02
1.281000e+03	9.214844e+03	4.177600e+02	6.463956e+02	2.864890e+02	-2.591735e+02	1.157970e+02	-7.998579e+01	2.602341e+02	5.611285e+02	8.526945e+01	-1.222801e+02	3.861588e+02	-9.968147e+01	4.087606e+02	-7.703249e+01	-1.105150e+02	-1.486639e+02	-1.405096e+02
1.282000e+03	9.831399e+03	5.268621e+02	7.241704e+02	3.424964e+02	-2.316434e+02	1.461617e+02	-6.611951e+01	2.943574e+02	6.123369e+02	1.118366e+02	-1.116272e+02	4.298108e+02	-8.732610e+01	4.541157e+02	-7.774570e+01	-1.004453e+02	-1.312034e+02	-1.290969e+02
1.283000e+03	1.038284e+04	5.937219e+02	7.752286e+02	3.782938e+02	-2.182473e+02	1.615159e+02	-5.872379e+01	3.140491e+02	6.504477e+02	1.247845e+02	-1.073219e+02	4.611776e+02	-8.289482e+01	4.856091e+02	-7.792939e+01	-9.545496e+01	-1.227977e+02	-1.240304e+02
1.284000e+03	1.075997e+04	6.450000e+02	8.068510e+02	4.082674e+02	-1.997414e+02	1.699903e+02	-4.863863e+01	3.217527e+02	6.747464e+02	1.321083e+02	-9.982950e+01	4.850967e+02	-7.683906e+01	5.080921e+02	-7.234247e+01	-8.651971e+01	-1.132270e+02	-1.152205e+02
1.285000e+03	1.088751e+04	7.020479e+02	8.257461e+02	4.441266e+02	-1.618551e+02	1.779382e+02	-2.923849e+01	3.198078e+02	6.859609e+02	1.397886e+02	-8.198418e+01	5.059369e+02	-6.181805e+01	5.261082e+02	-5.682250e+01	-6.738663e+01	-9.447383e+01	-9.541565e+01
1.286000e+03	1.074523e+04	7.752800e+02	8.363636e+02	4.920435e+02	-9.919342e+01	1.881575e+02	1.818728e+00	3.096925e+02	6.863129e+02	1.500535e+02	-5.086544e+01	5.266698e+02	-3.463164e+01	5.429088e+02	-2.958577e+01	-3.628351e+01	-6.291530e+01	-6.217561e+01
1.287000e+03	1.037358e+04	8.627561e+02	8.403294e+02	5.518329e+02	-1.602217e+01	1.995394e+02	4.236497e+01	2.918255e+02	6.792366e+02	1.610948e+02	-8.206735e+00	5.485029e+02	3.327297e+00	5.600419e+02	8.090818e+00	3.922184e+00	-1.994980e+01	-1.816573e+01
1.288000e+03	9.861145e+03	9.529833e+02	8.369758e+02	6.181276e+02	7.611088e+01	2.081607e+02	8.696542e+01	2.659563e+02	6.687102e+02	1.682666e+02	4.066331e+01	5.710187e+02	4.710878e+01	5.774687e+02	5.202036e+01	4.707280e+01	2.903249e+01	3.020550e+01
1.289000e+03	9.317731e+03	1.030386e+03	8.245452e+02	6.828000e+02	1.627859e+02	2.093031e+02	1.290329e+02	2.319332e+02	6.582969e+02	1.662483e+02	8.882098e+01	5.926114e+02	9.019066e+01	5.939851e+02	9.604169e+01	8.597916e+01	7.680081e+01	7.517113e+01
1.290000e+03	8.842211e+03	1.081051e+03	8.014599e+02	7.375480e+02	2.313494e+02	1.995493e+02	1.629354e+02	1.904857e+02	6.501535e+02	1.513054e+02	1.298745e+02	6.109740e+02	1.265779e+02	6.076805e+02	1.334508e+02	1.146920e+02	1.166507e+02	1.100493e+02
1.291000e+03	8.495808e+03	1.096572e+03	7.671250e+02	7.757285e+02	2.741021e+02	1.781320e+02	1.853274e+02	1.436473e+02	6.443405e+02	1.227825e+02	1.594674e+02	6.234778e+02	1.522556e+02	6.162683e+02	1.585019e+02	1.299779e+02	1.441164e+02	1.308776e+02
1.292000e+03	8.289523e+03	1.074936e+03	7.220290e+02	7.930344e+02	2.891563e+02	1.470682e+02	1.953590e+02	9.460262e+01	6.387164e+02	8.330988e+01	1.757621e+02	6.274268e+02	1.656129e+02	6.172789e+02	1.675597e+02	1.316004e+02	1.575464e+02	1.368083e+02
1.293000e+03	8.188708e+03	1.018760e+03	6.672569e+02	7.871802e+02	2.791136e+02	1.101365e+02	1.939186e+02	4.699491e+01	6.295178e+02	3.773599e+01	1.789615e+02	6.202627e+02	1.669225e+02	6.082243e+02	1.596276e+02	1.215175e+02	1.575845e+02	1.293801e+02
1.294000e+03	8.131344e+03	9.322059e+02	6.037726e+02	7.571081e+02	2.485228e+02	7.122370e+01	1.824294e+02	3.973460e+00	6.124699e+02	-8.700594e+00	1.702772e+02	5.998000e+02	1.573123e+02	5.868349e+02	1.361931e+02	1.025045e+02	1.460044e+02	1.111849e+02
1.295000e+03	8.051843e+03	8.181929e+02	5.318810e+02	7.022721e+02	2.013590e+02	3.278541e+01	1.618058e+02	-3.261869e+01	5.840614e+02	-5.218356e+01	1.508845e+02	5.645006e+02	1.377744e+02	5.513898e+02	1.005478e+02	7.683635e+01	1.245065e+02	8.457501e+01
1.296000e+03	7.901205e+03	6.771574e+02	4.511648e+02	6.223810e+02	1.395452e+02	-4.927678e+00	1.320124e+02	-6.257620e+01	5.425546e+02	-9.139254e+01	1.213130e+02	5.137419e+02	1.086405e+02	5.010682e+02	5.688007e+01	4.554708e+01	9.397989e+01	5.091446e+01
1.297000e+03	7.657334e+03	5.078075e+02	3.609713e+02	5.177265e+02	6.297938e+01	-4.357887e+01	9.236326e+01	-8.705454e+01	4.884234e+02	-1.274542e+02	8.149013e+01	4.480265e+02	6.969971e+01	4.362347e+02	9.458593e+00	8.487598e+00	5.447185e+01	1.058168e+01
1.298000e+03	7.324425e+03	3.095067e+02	2.613047e+02	3.899949e+02	-2.909195e+01	-8.554438e+01	4.239566e+01	-1.078217e+02	4.241606e+02	-1.628573e+02	3.137883e+01	3.691268e+02	2.086622e+01	3.586129e+02	-3.787940e+01	-3.491748e+01	5.804527e+00	-3.638222e+01
1.299000e+03	6.924944e+03	8.530507e+01	1.538235e+02	2.432813e+02	-1.359997e+02	-1.323213e+02	-1.706456e+01	-1.263647e+02	3.536445e+02	-1.998217e+02	-2.807969e+01	2.801881e+02	-3.691028e+01	2.713564e+02	-8.188868e+01	-8.456530e+01	-5.145585e+01	-8.931078e+01
1.300000e+03	6.489647e+03	-1.555929e+02	4.257485e+01	8.490540e+01	-2.537446e+02	-1.831996e+02	-8.308461e+01	-1.432076e+02	2.813708e+02	-2.387961e+02	-9.412378e+01	1.857819e+02	-1.008814e+02	1.790235e+02	-1.198422e+02	-1.386813e+02	-1.150844e+02	-1.460494e+02
1.301000e+03	6.049953e+03	-3.969794e+02	-6.585164e+01	-7.440177e+01	-3.740424e+02	-2.347256e+02	-1.504096e+02	-1.576768e+02	2.118093e+02	-2.776606e+02	-1.618153e+02	9.182405e+01	-1.662320e+02	8.740690e+01	-1.494207e+02	-1.933448e+02	-1.807179e+02	-2.025490e+02
1.302000e+03	5.634110e+03	-6.169872e+02	-1.629301e+02	-2.212675e+02	-4.847900e+02	-2.811642e+02	-2.120063e+02	-1.681479e+02	1.489893e+02	-3.119187e+02	-2.243984e+02	5.216267e+00	-2.264910e+02	3.123665e+00	-1.687379e+02	-2.427612e+02	-2.420479e+02	-2.531125e+02
1.303000e+03	5.266051e+03	-7.915259e+02	-2.395299e+02	-3.414645e+02	-5.719567e+02	-3.158052e+02	-2.602767e+02	-1.726354e+02	9.625995e+01	-3.357890e+02	-2.743616e+02	-6.689635e+01	-2.745762e+02	-6.711050e+01	-1.765600e+02	-2.802607e+02	-2.917135e+02	-2.912783e+02
1.304000e+03	4.964875e+03	-8.990336e+02	-2.877040e+02	-4.224119e+02	-6.224427e+02	-3.326732e+02	-2.886233e+02	-1.694932e+02	5.610803e+01	-3.438111e+02	-3.049408e+02	-1.182129e+02	-3.042075e+02	-1.174790e+02	-1.726418e+02	-2.997615e+02	-3.226974e+02	-3.111268e+02
1.305000e+03	4.743590e+03	-9.252637e+02	-3.024753e+02	-4.557523e+02	-6.271069e+02	-3.280880e+02	-2.929203e+02	-1.579952e+02	2.995884e+01	-3.324332e+02	-3.116262e+02	-1.444823e+02	-3.112787e+02	-1.441340e+02	-1.580036e+02	-2.972655e+02	-3.298564e+02	-3.086452e+02
1.306000e+03	4.607081e+03	-8.666961e+02	-2.830936e+02	-4.392301e+02	-5.830568e+02	-3.015933e+02	-2.724426e+02	-1.386283e+02	1.798331e+01	-3.010760e+02	-2.932102e+02	-1.444674e+02	-2.947713e+02	-1.460278e+02	-1.349716e+02	-2.719251e+02	-3.111459e+02	-2.827477e+02
1.307000e+03	4.550335e+03	-7.314896e+02	-2.333479e+02	-3.772463e+02	-4.944753e+02	-2.559940e+02	-2.299660e+02	-1.130281e+02	1.901039e+01	-2.523576e+02	-2.520447e+02	-1.203219e+02	-2.569327e+02	-1.252094e+02	-1.068884e+02	-2.263290e+02	-2.681600e+02	-2.356263e+02
1.308000e+03	4.558142e+03	-5.376390e+02	-1.607944e+02	-2.798765e+02	-3.717085e+02	-1.965467e+02	-1.710164e+02	-8.359192e+01	3.064784e+01	-1.914416e+02	-1.934429e+02	-7.720438e+01	-2.026798e+02	-8.644120e+01	-7.754402e+01	-1.659103e+02	-2.058117e+02	-1.723135e+02
1.309000e+03	4.607087e+03	-3.089102e+02	-7.511767e+01	-1.606528e+02	-2.289012e+02	-1.296252e+02	-1.025278e+02	-5.290608e+01	4.964812e+01	-1.247653e+02	-1.244436e+02	-2.221328e+01	-1.384465e+02	-3.621664e+01	-5.049336e+01	-9.766642e+01	-1.312481e+02	-9.959252e+01
1.310000e+03	4.669816e+03	-6.984429e+01	1.386937e+01	-3.380093e+01	-8.094456e+01	-6.132909e+01	-3.135269e+01	-2.317752e+01	7.246099e+01	-5.859113e+01	-5.234882e+01	3.704536e+01	-7.085252e+01	1.854080e+01	-2.847209e+01	-2.861281e+01	-5.234488e+01	-2.460341e+01
1.311000e+03	4.720824e+03	1.586465e+02	9.798270e+01	8.825448e+01	5.931035e+01	3.528137e+00	3.692311e+01	4.143334e+00	9.583846e+01	2.144727e+00	1.652322e+01	9.383794e+01	-5.588785e+00	7.172476e+01	-1.307625e+01	3.554200e+01	2.375585e+01	4.642463e+01
1.312000e+03	4.742384e+03	3.619065e+02	1.717034e+02	1.964814e+02	1.827920e+02	6.181083e+01	9.856372e+01	2.844010e+01	1.173320e+02	5.437187e+01	7.756767e+01	1.432619e+02	5.321526e+01	1.189081e+02	-4.764396e+00	9.112729e+01	9.165330e+01	1.089700e+02
1.313000e+03	4.729026e+03	5.319156e+02	2.322924e+02	2.856520e+02	2.845499e+02	1.118428e+02	1.516091e+02	4.971293e+01	1.355483e+02	9.674464e+01	1.280146e+02	1.825781e+02	1.030708e+02	1.576329e+02	-3.129075e+00	1.365136e+02	1.480264e+02	1.603959e+02
1.314000e+03	4.689218e+03	6.657211e+02	2.790941e+02	3.536778e+02	3.628550e+02	1.527904e+02	1.953015e+02	6.817382e+01	1.500971e+02	1.289977e+02	1.665526e+02	2.109190e+02	1.427568e+02	1.871220e+02	-7.309256e+00	1.715113e+02	1.913358e+02	1.995817e+02
1.315000e+03	4.643769e+03	7.627671e+02	3.123638e+02	4.002463e+02	4.175913e+02	1.839395e+02	2.292863e+02	8.381281e+01	1.612532e+02	1.511112e+02	1.926776e+02	2.285498e+02	1.716958e+02	2.075668e+02	-1.639209e+01	1.964603e+02	2.211252e+02	2.262393e+02
1.316000e+03	4.621517e+03	8.221504e+02	3.320416e+02	4.252550e+02	4.486038e+02	2.041161e+02	2.528662e+02	9.607851e+01	1.694427e+02	1.625995e+02	2.060080e+02	2.359621e+02	1.892933e+02	2.192463e+02	-2.967526e+01	2.113517e+02	2.372485e+02	2.401949e+02
1.317000e+03	4.653813e+03	8.406810e+02	3.368528e+02	4.275203e+02	4.545659e+02	2.113994e+02	2.645180e+02	1.037571e+02	1.747235e+02	1.621298e+02	2.057622e+02	2.330949e+02	1.944267e+02	2.217583e+02	-4.671514e+01	2.152503e+02	2.393140e+02	2.408752e+02
1.318000e+03	4.769448e+03	8.122842e+02	3.239825e+02	4.041261e+02	4.326766e+02	2.031675e+02	2.617901e+02	1.050664e+02	1.764443e+02	1.475382e+02	1.905249e+02	2.189153e+02	1.852125e+02	2.136019e+02	-6.715858e+01	2.061626e+02	2.265138e+02	2.271330e+02
1.319000e+03	4.991039e+03	7.289030e+02	2.894249e+02	3.506246e+02	3.792288e+02	1.764599e+02	2.416220e+02	9.793868e+01	1.732162e+02	1.162085e+02	1.583677e+02	1.914857e+02	1.591407e+02	1.922576e+02	-9.043369e+01	1.813724e+02	1.978570e+02	1.974521e+02
1.320000e+03	5.332767e+03	5.827620e+02	2.289795e+02	2.621397e+02	2.908967e+02	1.286240e+02	2.010697e+02	8.045177e+01	1.632424e+02	6.573652e+01	1.073424e+02	1.485273e+02	1.136140e+02	1.547978e+02	-1.154350e+02	1.381843e+02	1.527129e+02	1.504952e+02
1.321000e+03	5.798489e+03	3.696292e+02	1.397572e+02	1.352544e+02	1.664781e+02	5.820762e+01	1.383602e+02	5.137162e+01	1.449453e+02	-5.189072e+00	3.631335e+01	8.838509e+01	4.687031e+01	9.894122e+01	-1.403555e+02	7.496593e+01	9.151158e+01	8.591051e+01
1.322000e+03	6.379215e+03	9.247374e+01	2.193918e+01	-2.964792e+01	8.744750e+00	-3.399361e+01	5.410236e+01	1.074271e+01	1.177267e+02	-9.578876e+01	-5.398867e+01	1.119572e+01	-4.084318e+01	2.434074e+01	-1.627766e+02	-7.689894e+00	1.643185e+01	5.249444e+00
1.323000e+03	7.049938e+03	-2.354115e+02	-1.196425e+02	-2.261829e+02	-1.740719e+02	-1.439573e+02	-4.765568e+01	-3.959486e+01	8.262516e+01	-2.022691e+02	-1.599435e+02	-8.004880e+01	-1.461341e+02	-6.623935e+01	-1.800349e+02	-1.059642e+02	-6.811371e+01	-8.725024e+01
1.324000e+03	7.767183e+03	-5.890540e+02	-2.746913e+02	-4.407336e+02	-3.677598e+02	-2.638945e+02	-1.589531e+02	-9.575655e+01	4.261178e+01	-3.173045e+02	-2.744388e+02	-1.789365e+02	-2.617975e+02	-1.662945e+02	-1.897773e+02	-2.123596e+02	-1.554103e+02	-1.843543e+02
1.325000e+03	8.469680e+03	-9.334247e+02	-4.279970e+02	-6.530283e+02	-5.531515e+02	-3.825754e+02	-2.684443e+02	-1.520429e+02	2.317831e+00	-4.303160e+02	-3.871103e+02	-2.759566e+02	-3.770722e+02	-2.659170e+02	-1.905346e+02	-3.161813e+02	-2.369847e+02	-2.763333e+02
1.326000e+03	9.084296e+03	-1.228584e+03	-5.616498e+02	-8.389711e+02	-7.089370e+02	-4.867789e+02	-3.631076e+02	-2.017569e+02	-3.284852e+01	-5.288022e+02	-4.856782e+02	-3.598963e+02	-4.790752e+02	-3.532910e+02	-1.821243e+02	-4.051274e+02	-3.038285e+02	-3.524237e+02
1.327000e+03	9.537620e+03	-1.437600e+03	-6.586160e+02	-9.753637e+02	-8.158506e+02	-5.637207e+02	-4.308692e+02	-2.385026e+02	-5.800658e+01	-6.006100e+02	-5.582412e+02	-4.201177e+02	-5.552460e+02	-4.171195e+02	-1.657383e+02	-4.677552e+02	-3.481183e+02	-4.030261e+02
1.328000e+03	9.771012e+03	-1.535071e+03	-7.066989e+02	-1.045240e+03	-8.610930e+02	-6.038366e+02	-4.634036e+02	-2.576169e+02	-7.011761e+01	-6.365813e+02	-5.959284e+02	-4.490870e+02	-5.961525e+02	-4.493074e+02	-1.436719e+02	-4.961456e+02	-3.649731e+02	-4.220153e+02
1.329000e+03	9.754640e+03	-1.513325e+03	-7.015364e+02	-1.042007e+03	-8.414804e+02	-6.030016e+02	-4.581441e+02	-2.572599e+02	-6.881978e+01	-6.327162e+02	-5.950219e+02	-4.442823e+02	-5.977238e+02	-4.469797e+02	-1.187689e+02	-4.878564e+02	-3.536510e+02	-4.083406e+02
1.330000e+03	9.495535e+03	-1.383914e+03	-6.474931e+02	-9.708267e+02	-7.640916e+02	-5.633672e+02	-4.187258e+02	-2.387593e+02	-5.643358e+01	-5.910588e+02	-5.577536e+02	-4.087401e+02	-5.620854e+02	-4.130671e+02	-9.374852e+01	-4.464158e+02	-3.177025e+02	-3.662582e+02
1.331000e+03	9.036345e+03	-1.173698e+03	-5.560725e+02	-8.466764e+02	-6.440784e+02	-4.924908e+02	-3.536711e+02	-2.060816e+02	-3.710979e+01	-5.189617e+02	-4.914555e+02	-3.499972e+02	-4.966776e+02	-3.552142e+02	-7.062473e+01	-3.801409e+02	-2.639621e+02	-3.040465e+02
1.332000e+03	8.444864e+03	-9.169692e+02	-4.424510e+02	-6.898313e+02	-5.004038e+02	-4.011023e+02	-2.738209e+02	-1.646313e+02	-1.544813e+01	-4.270017e+02	-4.063923e+02	-2.778261e+02	-4.120032e+02	-2.834319e+02	-5.038428e+01	-2.997197e+02	-2.007051e+02	-2.316551e+02
1.333000e+03	7.797869e+03	-6.465307e+02	-3.214447e+02	-5.204934e+02	-3.510395e+02	-3.003549e+02	-1.894876e+02	-1.198253e+02	4.874182e+00	-3.263177e+02	-3.131026e+02	-2.016255e+02	-3.188657e+02	-2.073836e+02	-3.299822e+01	-2.154500e+02	-1.356056e+02	-1.581545e+02
1.334000e+03	7.164836e+03	-3.868018e+02	-2.043211e+02	-3.544587e+02	-2.092369e+02	-1.995199e+02	-1.083189e+02	-7.593292e+01	2.196098e+01	-2.262809e+02	-2.201885e+02	-1.283939e+02	-2.260629e+02	-1.342636e+02	-1.771767e+01	-1.350797e+02	-7.416784e+01	-8.986178e+01
1.335000e+03	6.596745e+03	-1.508910e+02	-9.737874e+01	-2.010814e+02	-8.190279e+01	-1.047802e+02	-3.445165e+01	-3.550608e+01	3.579361e+01	-1.331713e+02	-1.331950e+02	-6.187795e+01	-1.392020e+02	-6.788048e+01	-3.514950e+00	-6.284261e+01	-1.906524e+01	-2.966832e+01
1.336000e+03	6.122807e+03	5.822035e+01	-2.409952e+00	-6.371424e+01	2.981407e+01	-1.924351e+01	3.106650e+01	5.365942e-01	4.764764e+01	-5.005671e+01	-5.469459e+01	-2.951318e+00	-6.076236e+01	-9.015083e+00	1.049545e+01	2.535105e-01	2.956067e+01	2.244108e+01
1.337000e+03	5.754846e+03	2.437982e+02	8.155974e+01	5.815890e+01	1.284350e+02	5.619483e+01	8.909781e+01	3.236105e+01	5.916323e+01	2.239713e+01	1.479693e+01	4.919447e+01	8.963902e+00	4.336500e+01	2.478002e+01	5.530054e+01	7.313899e+01	6.813285e+01
1.338000e+03	5.496458e+03	4.109094e+02	1.562094e+02	1.663609e+02	2.176762e+02	1.217517e+02	1.411677e+02	6.051902e+01	7.147439e+01	8.473540e+01	7.568398e+01	9.568676e+01	7.067232e+01	9.067825e+01	3.929588e+01	1.041522e+02	1.135319e+02	1.093785e+02
1.339000e+03	5.353091e+03	5.632630e+02	2.223944e+02	2.621528e+02	3.005917e+02	1.779633e+02	1.886893e+02	8.539331e+01	8.470004e+01	1.376945e+02	1.284849e+02	1.369980e+02	1.251517e+02	1.336677e+02	5.355345e+01	1.484217e+02	1.521802e+02	1.475534e+02
1.340000e+03	5.339540e+03	7.022214e+02	2.795928e+02	3.456258e+02	3.788573e+02	2.254548e+02	2.328422e+02	1.069467e+02	9.790129e+01	1.816915e+02	1.736175e+02	1.726436e+02	1.729780e+02	1.720066e+02	6.675942e+01	1.890805e+02	1.897882e+02	1.832060e+02
1.341000e+03	5.482642e+03	8.277153e+02	3.262707e+02	4.162383e+02	4.531090e+02	2.651786e+02	2.749207e+02	1.247671e+02	1.094205e+02	2.168503e+02	2.116923e+02	2.015017e+02	2.147315e+02	2.045431e+02	7.797401e+01	2.265944e+02	2.265264e+02	2.163763e+02
1.342000e+03	5.818253e+03	9.399751e+02	3.607497e+02	4.738907e+02	5.237781e+02	2.987819e+02	3.167394e+02	1.382815e+02	1.174092e+02	2.433408e+02	2.439754e+02	2.224670e+02	2.514181e+02	2.299117e+02	8.624934e+01	2.613006e+02	2.624888e+02	2.471077e+02
1.343000e+03	6.382591e+03	1.040769e+03	3.820493e+02	5.197724e+02	5.917066e+02	3.287139e+02	3.606767e+02	1.469810e+02	1.203443e+02	2.617057e+02	2.726146e+02	2.350679e+02	2.846988e+02	2.471539e+02	9.074932e+01	2.936710e+02	2.980457e+02	2.757640e+02
1.344000e+03	7.198964e+03	1.133241e+03	3.903133e+02	5.564231e+02	6.580184e+02	3.578287e+02	4.091287e+02	1.505528e+02	1.173911e+02	2.729234e+02	3.003518e+02	2.397609e+02	3.166569e+02	2.560678e+02	9.086416e+01	3.242261e+02	3.338006e+02	3.029107e+02
1.345000e+03	8.262159e+03	1.220224e+03	3.866917e+02	5.868775e+02	7.231600e+02	3.885088e+02	4.634525e+02	1.488989e+02	1.085539e+02	2.781396e+02	3.296984e+02	2.377940e+02	3.490793e+02	2.571764e+02	8.632403e+01	3.530860e+02	3.700800e+02	3.287831e+02
1.346000e+03	9.524620e+03	1.301756e+03	3.728241e+02	6.132387e+02	7.855214e+02	4.216088e+02	5.227830e+02	1.420963e+02	9.462562e+01	2.782007e+02	3.618446e+02	2.307299e+02	3.825062e+02	2.513928e+02	7.729511e+01	3.793777e+02	4.061468e+02	3.526024e+02
1.347000e+03	1.089004e+04	1.373067e+03	3.502412e+02	6.353585e+02	8.403903e+02	4.556853e+02	5.832817e+02	1.303726e+02	7.699146e+01	2.732523e+02	3.957633e+02	2.198716e+02	4.154865e+02	2.395955e+02	6.442643e+01	4.008514e+02	4.395390e+02	3.721359e+02
1.348000e+03	1.221987e+04	1.424334e+03	3.200268e+02	6.503497e+02	8.800116e+02	4.869535e+02	6.383238e+02	1.141547e+02	5.736780e+01	2.626618e+02	4.279904e+02	2.058760e+02	4.444755e+02	2.223612e+02	4.881681e+01	4.140347e+02	4.659741e+02	3.838469e+02
1.349000e+03	1.335531e+04	1.442894e+03	2.829607e+02	6.533745e+02	8.951521e+02	5.101758e+02	6.798319e+02	9.419477e+01	3.756464e+01	2.453987e+02	4.533473e+02	1.887705e+02	4.646081e+02	2.000306e+02	3.189269e+01	4.150575e+02	4.800893e+02	3.837619e+02
1.350000e+03	1.415151e+04	1.417578e+03	2.401308e+02	6.396200e+02	8.779196e+02	5.203171e+02	7.004942e+02	7.173000e+01	1.933892e+01	2.207942e+02	4.665017e+02	1.684059e+02	4.712198e+02	1.731226e+02	1.522074e+01	4.009741e+02	4.769382e+02	3.688576e+02
1.351000e+03	1.451497e+04	1.343730e+03	1.937572e+02	6.068039e+02	8.249219e+02	5.144454e+02	6.961768e+02	4.858910e+01	4.359389e+00	1.893996e+02	4.638786e+02	1.451734e+02	4.616373e+02	1.429300e+02	3.072324e-01	3.711338e+02	4.537799e+02	3.384846e+02
1.352000e+03	1.443154e+04	1.226952e+03	1.478099e+02	5.572235e+02	7.395146e+02	4.931914e+02	6.676539e+02	2.715915e+01	-5.758689e+00	1.535697e+02	4.452236e+02	1.206559e+02	4.365746e+02	1.120042e+02	-1.155905e+01	3.280350e+02	4.114716e+02	2.952380e+02
1.353000e+03	1.397467e+04	1.083878e+03	1.080324e+02	4.984467e+02	6.321059e+02	4.612048e+02	6.209790e+02	1.015716e+01	-9.437894e+00	1.174705e+02	4.142133e+02	9.787982e+01	4.005734e+02	8.423687e+01	-1.939166e+01	2.772477e+02	3.548518e+02	2.448381e+02
1.354000e+03	1.328991e+04	9.393720e+02	8.118685e+01	4.422348e+02	5.181999e+02	4.264028e+02	5.663024e+02	2.181934e-01	-5.236348e+00	8.642268e+01	3.778574e+02	8.097266e+01	3.612675e+02	6.437965e+01	-2.253760e+01	2.263254e+02	2.918710e+02	1.949545e+02
1.355000e+03	1.256014e+04	8.208679e+02	7.364052e+01	4.019280e+02	4.147449e+02	3.982244e+02	5.154979e+02	-6.189425e-01	7.892147e+00	6.574723e+01	3.448739e+02	7.426278e+01	3.276694e+02	5.705515e+01	-2.070925e+01	1.830242e+02	2.317215e+02	1.533177e+02
1.356000e+03	1.196225e+04	7.515854e+02	8.966596e+01	3.890494e+02	3.359773e+02	3.853927e+02	4.793186e+02	8.597306e+00	3.020770e+01	5.945668e+01	3.235405e+02	8.107131e+01	3.079809e+02	6.550880e+01	-1.406262e+01	1.533864e+02	1.825969e+02	1.257297e+02
1.357000e+03	1.162754e+04	7.446196e+02	1.299533e+02	4.100886e+02	2.900643e+02	3.937626e+02	4.648619e+02	2.739294e+01	6.078318e+01	6.916834e+01	3.196214e+02	1.025625e+02	3.075279e+02	9.046639e+01	-3.309266e+00	1.402720e+02	1.498040e+02	1.146058e+02
1.358000e+03	1.161590e+04	7.995266e+02	1.908046e+02	4.643577e+02	2.774860e+02	4.247577e+02	4.739571e+02	5.378259e+01	9.727136e+01	9.353140e+01	3.348864e+02	1.370237e+02	3.273348e+02	1.294701e+02	1.022465e+01	1.427358e+02	1.347671e+02	1.184706e+02
1.359000e+03	1.190888e+04	9.022983e+02	2.643475e+02	5.435644e+02	2.914935e+02	4.747720e+02	5.028296e+02	8.449006e+01	1.360195e+02	1.283261e+02	3.665829e+02	1.798587e+02	3.637058e+02	1.769802e+02	2.471058e+01	1.563893e+02	1.351249e+02	1.325253e+02
1.360000e+03	1.242218e+04	1.028849e+03	3.398948e+02	6.334203e+02	3.204216e+02	5.357804e+02	5.431546e+02	1.154763e+02	1.726325e+02	1.672605e+02	4.080566e+02	2.244195e+02	4.090003e+02	2.253625e+02	3.816788e+01	1.746407e+02	1.458036e+02	1.501012e+02
1.361000e+03	1.303408e+04	1.151371e+03	4.062932e+02	7.171545e+02	3.512182e+02	5.972051e+02	5.843560e+02	1.427116e+02	2.029340e+02	2.033575e+02	4.505091e+02	2.635823e+02	4.535709e+02	2.666441e+02	4.899527e+01	1.905147e+02	1.607256e+02	1.646007e+02
1.362000e+03	1.362279e+04	1.246152e+03	4.547639e+02	7.802292e+02	3.732989e+02	6.487481e+02	6.166918e+02	1.630491e+02	2.240946e+02	2.306678e+02	4.855794e+02	2.917152e+02	4.885116e+02	2.946482e+02	5.649425e+01	1.986179e+02	1.747003e+02	1.714056e+02
1.363000e+03	1.410307e+04	1.300760e+03	4.814457e+02	8.149627e+02	3.817124e+02	6.834786e+02	6.343249e+02	1.749851e+02	2.355632e+02	2.458812e+02	5.080698e+02	3.064604e+02	5.084982e+02	3.068906e+02	6.114015e+01	1.967339e+02	1.849932e+02	1.692226e+02
1.364000e+03	1.445086e+04	1.318233e+03	4.887475e+02	8.234525e+02	3.786640e+02	7.001450e+02	6.373793e+02	1.790610e+02	2.394253e+02	2.493212e+02	5.178825e+02	3.096856e+02	5.137608e+02	3.055667e+02	6.442703e+01	1.865615e+02	1.921115e+02	1.604576e+02
1.365000e+03	1.470691e+04	1.316489e+03	4.848631e+02	8.174702e+02	3.728019e+02	7.037320e+02	6.321248e+02	1.777260e+02	2.399638e+02	2.448988e+02	5.203114e+02	3.071354e+02	5.103259e+02	2.971538e+02	6.829353e+01	1.732969e+02	1.995085e+02	1.504625e+02
1.366000e+03	1.495623e+04	1.322582e+03	4.813827e+02	8.149454e+02	3.763170e+02	7.038148e+02	6.289908e+02	1.746373e+02	2.424683e+02	2.389146e+02	5.243399e+02	3.067427e+02	5.081905e+02	2.905983e+02	7.434181e+01	1.640951e+02	2.122205e+02	1.458475e+02
1.367000e+03	1.528869e+04	1.363424e+03	4.896628e+02	8.339825e+02	4.006981e+02	7.111243e+02	6.389311e+02	1.735809e+02	2.516282e+02	2.380357e+02	5.393898e+02	3.160782e+02	5.178884e+02	2.945830e+02	8.318344e+01	1.658458e+02	2.348475e+02	1.523790e+02
1.368000e+03	1.575466e+04	1.456112e+03	5.171712e+02	8.864629e+02	4.525732e+02	7.335420e+02	6.693765e+02	1.773564e+02	2.700322e+02	2.471411e+02	5.716826e+02	3.398098e+02	5.466329e+02	3.147675e+02	9.420901e+01	1.829778e+02	2.695887e+02	1.731542e+02
1.369000e+03	1.633280e+04	1.601435e+03	5.651001e+02	9.736078e+02	5.311345e+02	7.730614e+02	7.212742e+02	1.870030e+02	2.972806e+02	2.678222e+02	6.216367e+02	3.780909e+02	5.954920e+02	3.519549e+02	1.058883e+02	2.160360e+02	3.150914e+02	2.076620e+02
1.370000e+03	1.692353e+04	1.782937e+03	6.280702e+02	1.085173e+03	6.280780e+02	8.248944e+02	7.883312e+02	2.016093e+02	3.300105e+02	2.980630e+02	6.833423e+02	4.264538e+02	6.586896e+02	4.018107e+02	1.164541e+02	2.614998e+02	3.665721e+02	2.520080e+02
1.371000e+03	1.737221e+04	1.971733e+03	6.959144e+02	1.202495e+03	7.299849e+02	8.789944e+02	8.587167e+02	2.187184e+02	3.628009e+02	3.331170e+02	7.462952e+02	4.771882e+02	7.252736e+02	4.561767e+02	1.246361e+02	3.128386e+02	4.171421e+02	3.001341e+02
1.372000e+03	1.751410e+04	2.134966e+03	7.567320e+02	1.304090e+03	8.221107e+02	9.232749e+02	9.185064e+02	2.351088e+02	3.896254e+02	3.671098e+02	7.986300e+02	5.216149e+02	7.824384e+02	5.054337e+02	1.300967e+02	3.623401e+02	4.597689e+02	3.455020e+02
1.373000e+03	1.722452e+04	2.244597e+03	8.000223e+02	1.371605e+03	8.920881e+02	9.471854e+02	9.555344e+02	2.476321e+02	4.053623e+02	3.946625e+02	8.305367e+02	5.523817e+02	8.191846e+02	5.410395e+02	1.333825e+02	4.030102e+02	4.890790e+02	3.826000e+02
1.374000e+03	1.645600e+04	2.283528e+03	8.188793e+02	1.394077e+03	9.323011e+02	9.443444e+02	9.623067e+02	2.538399e+02	4.069126e+02	4.119684e+02	8.366225e+02	5.650310e+02	8.290068e+02	5.574245e+02	1.354639e+02	4.299296e+02	5.023757e+02	4.078199e+02
1.375000e+03	1.525062e+04	2.247653e+03	8.108139e+02	1.369414e+03	9.404659e+02	9.135262e+02	9.371837e+02	2.522983e+02	3.936810e+02	4.171338e+02	8.165864e+02	5.585076e+02	8.108677e+02	5.527971e+02	1.371386e+02	4.407906e+02	4.996826e+02	4.196117e+02
1.376000e+03	1.372550e+04	2.144270e+03	7.773906e+02	1.303278e+03	9.187821e+02	8.580811e+02	8.838218e+02	2.426428e+02	3.674165e+02	4.099742e+02	7.743606e+02	5.347404e+02	7.685013e+02	5.288880e+02	1.386190e+02	4.357148e+02	4.830773e+02	4.181501e+02
1.377000e+03	1.204012e+04	1.988492e+03	7.232168e+02	1.206443e+03	8.724693e+02	7.844274e+02	8.094896e+02	2.254945e+02	3.315953e+02	3.916210e+02	7.164192e+02	4.977156e+02	7.086953e+02	4.899973e+02	1.394902e+02	4.166834e+02	4.557985e+02	4.048661e+02
1.378000e+03	1.035844e+04	1.799375e+03	6.547890e+02	1.091870e+03	8.084066e+02	7.003686e+02	7.230739e+02	2.023201e+02	2.905931e+02	3.641950e+02	6.500487e+02	4.524628e+02	6.393795e+02	4.417980e+02	1.390061e+02	3.869006e+02	4.215205e+02	3.820874e+02
1.379000e+03	8.818185e+03	1.596742e+03	5.794322e+02	9.723209e+02	7.341469e+02	6.137267e+02	6.333920e+02	1.752375e+02	2.488565e+02	3.305745e+02	5.820774e+02	4.041891e+02	5.681082e+02	3.902233e+02	1.365154e+02	3.502402e+02	3.839226e+02	3.528033e+02
1.380000e+03	7.513882e+03	1.398787e+03	5.043271e+02	8.587332e+02	6.571563e+02	5.314050e+02	5.480360e+02	1.467273e+02	2.102106e+02	2.941152e+02	5.181423e+02	3.575948e+02	5.011192e+02	3.405743e+02	1.317718e+02	3.107464e+02	3.464268e+02	3.204055e+02
1.381000e+03	6.493406e+03	1.220134e+03	4.355545e+02	7.591654e+02	5.839992e+02	4.587498e+02	4.726711e+02	1.192352e+02	1.773695e+02	2.581837e+02	4.622978e+02	3.163147e+02	4.428353e+02	2.968542e+02	1.249897e+02	2.721049e+02	3.119119e+02	2.882554e+02
1.382000e+03	5.763733e+03	1.070154e+03	3.772113e+02	6.780895e+02	5.193838e+02	3.990708e+02	4.106230e+02	9.473077e+01	1.516832e+02	2.255269e+02	4.167560e+02	2.824762e+02	3.956007e+02	2.613224e+02	1.166676e+02	2.370787e+02	2.823235e+02	2.590777e+02
1.383000e+03	5.300329e+03	9.517833e+02	3.308095e+02	6.160376e+02	4.653060e+02	3.533277e+02	3.626906e+02	7.434942e+01	1.331332e+02	1.976754e+02	3.817165e+02	2.564560e+02	3.595708e+02	2.343115e+02	1.073297e+02	2.070374e+02	2.582880e+02	2.343598e+02
1.384000e+03	5.056507e+03	8.614301e+02	2.952216e+02	5.698095e+02	4.207179e+02	3.201297e+02	3.272591e+02	5.825309e+01	1.205659e+02	1.746550e+02	3.554156e+02	2.369645e+02	3.328349e+02	2.143848e+02	9.735013e+01	1.817833e+02	2.389555e+02	2.140282e+02
1.385000e+03	4.971726e+03	7.904053e+02	2.673131e+02	5.334569e+02	3.820691e+02	2.962019e+02	3.008366e+02	4.577942e+01	1.121176e+02	1.551952e+02	3.345707e+02	2.215298e+02	3.119168e+02	1.988768e+02	8.695016e+01	1.598285e+02	2.222630e+02	1.966114e+02
1.386000e+03	4.979570e+03	7.278178e+02	2.431581e+02	5.000156e+02	3.447294e+02	2.773298e+02	2.790258e+02	3.584065e+01	1.057417e+02	1.374165e+02	3.152600e+02	2.073137e+02	2.926909e+02	1.847454e+02	7.633817e+01	1.391109e+02	2.056424e+02	1.799052e+02
1.387000e+03	5.016289e+03	6.641829e+02	2.194720e+02	4.635975e+02	3.048817e+02	2.595686e+02	2.577452e+02	2.742609e+01	9.971591e+01	1.197564e+02	2.940592e+02	1.920423e+02	2.715435e+02	1.695271e+02	6.588138e+01	1.179316e+02	1.869750e+02	1.619292e+02
1.388000e+03	5.029571e+03	5.945194e+02	1.947487e+02	4.211750e+02	2.611723e+02	2.403333e+02	2.343418e+02	2.000566e+01	9.299771e+01	1.017513e+02	2.690708e+02	1.747395e+02	2.464233e+02	1.520924e+02	5.618303e+01	9.575857e+01	1.654388e+02	1.418003e+02
1.389000e+03	4.985849e+03	5.197092e+02	1.696415e+02	3.733763e+02	2.153983e+02	2.189695e+02	2.082005e+02	1.365796e+01	8.532684e+01	8.431493e+01	2.404478e+02	1.559803e+02	2.173841e+02	1.329166e+02	4.799409e+01	7.354509e+01	1.418770e+02	1.201431e+02
1.390000e+03	4.873855e+03	4.454766e+02	1.463899e+02	3.239173e+02	1.718455e+02	1.965726e+02	1.806128e+02	8.856552e+00	7.704590e+01	6.934411e+01	2.101756e+02	1.375304e+02	1.863760e+02	1.137304e+02	4.197866e+01	5.338370e+01	1.184830e+02	9.882538e+01
1.391000e+03	4.702980e+03	3.792976e+02	1.274873e+02	2.778275e+02	1.354512e+02	1.751274e+02	1.539463e+02	6.004013e+00	6.870912e+01	5.877805e+01	1.811638e+02	1.214806e+02	1.563374e+02	9.665375e+01	3.843250e+01	3.759671e+01	9.787184e+01	8.009443e+01
1.392000e+03	4.496817e+03	3.264972e+02	1.141433e+02	2.391624e+02	1.095174e+02	1.563344e+02	1.304617e+02	4.933561e+00	6.063839e+01	5.350462e+01	1.560037e+02	1.092074e+02	1.299474e+02	8.315055e+01	3.708985e+01	2.763180e+01	8.189838e+01	6.547478e+01
1.393000e+03	4.284180e+03	2.872480e+02	1.052424e+02	2.091696e+02	9.397758e+01	1.406474e+02	1.112778e+02	4.635076e+00	5.261916e+01	5.262280e+01	1.359110e+02	1.006053e+02	1.085586e+02	7.325239e+01	3.712677e+01	2.325306e+01	7.073234e+01	5.492773e+01
1.394000e+03	4.090808e+03	2.558891e+02	9.733141e+01	1.857243e+02	8.504517e+01	1.269634e+02	9.593164e+01	3.375738e+00	4.387986e+01	5.345105e+01	1.203090e+02	9.395384e+01	9.176616e+01	6.541067e+01	3.738722e+01	2.241897e+01	6.262927e+01	4.668831e+01
1.395000e+03	3.934260e+03	2.229886e+02	8.573405e+01	1.643109e+02	7.649783e+01	1.131153e+02	8.270614e+01	-7.912348e-01	3.337796e+01	5.235571e+01	1.072326e+02	8.652369e+01	7.778377e+01	5.707487e+01	3.675493e+01	2.194587e+01	5.455083e+01	3.790124e+01
1.396000e+03	3.822811e+03	1.793242e+02	6.637165e+01	1.401244e+02	6.211043e+01	9.694319e+01	6.954750e+01	-9.320570e+00	2.027629e+01	4.609526e+01	9.435654e+01	7.569087e+01	6.443035e+01	4.576505e+01	3.451699e+01	1.869836e+01	4.340755e+01	2.580657e+01
1.397000e+03	3.757187e+03	1.200438e+02	3.752244e+01	1.103416e+02	3.820977e+01	7.743982e+01	5.512133e+01	-2.256289e+01	4.403252e+00	3.311947e+01	8.016499e+01	6.008423e+01	5.025378e+01	3.017380e+01	3.055866e+01	1.079922e+01	2.740345e+01	8.959238e+00
1.398000e+03	3.733133e+03	4.717471e+01	7.610157e-01	7.553885e+01	5.256671e+00	5.543225e+01	3.951287e+01	-3.950277e+01	-1.350172e+01	1.426349e+01	6.471824e+01	4.026296e+01	3.527127e+01	1.081720e+01	2.530141e+01	-1.658141e+00	6.905876e+00	-1.205500e+01
1.399000e+03	3.743185e+03	-3.055745e+01	-3.930765e+01	3.966173e+01	-3.217981e+01	3.349182e+01	2.427562e+01	-5.794880e+01	-3.185341e+01	-7.452976e+00	4.968604e+01	1.864063e+01	2.101514e+01	-1.002866e+01	1.941612e+01	-1.667181e+01	-1.551821e+01	-3.470321e+01
1.400000e+03	3.777358e+03	-1.003639e+02	-7.635225e+01	8.662835e+00	-6.693800e+01	1.514279e+01	1.187109e+01	-7.508129e+01	-4.854909e+01	-2.780142e+01	3.768653e+01	-1.271160e+00	9.926603e+00	-2.902915e+01	1.344828e+01	-3.107596e+01	-3.587314e+01	-5.530288e+01
1.401000e+03	3.823551e+03	-1.491586e+02	-1.040438e+02	-1.146241e+01	-9.149665e+01	3.765434e+00	4.832932e+00	-8.812309e+01	-6.140439e+01	-4.263721e+01	3.130181e+01	-1.592056e+01	4.449509e+00	-4.277066e+01	7.527919e+00	-4.157260e+01	-4.993579e+01	-7.012930e+01
1.402000e+03	3.868758e+03	-1.667961e+02	-1.174858e+02	-1.631749e+01	-9.993570e+01	1.690750e+00	5.075568e+00	-9.488094e+01	-6.852524e+01	-4.895809e+01	3.225505e+01	-2.260446e+01	6.277580e+00	-4.857958e+01	1.289683e+00	-4.557606e+01	-5.437181e+01	-7.633944e+01
1.403000e+03	3.901419e+03	-1.476681e+02	-1.138875e+02	-3.808725e+00	-8.894012e+01	9.818985e+00	1.361681e+01	-9.400905e+01	-6.851878e+01	-4.536599e+01	4.108117e+01	-1.987772e+01	1.605961e+01	-4.489691e+01	-5.971044e+00	-4.157078e+01	-4.738172e+01	-7.239239e+01
1.404000e+03	3.914184e+03	-9.058044e+01	-9.247759e+01	2.610907e+01	-5.776982e+01	2.777784e+01	3.070176e+01	-8.500529e+01	-6.055909e+01	-3.191573e+01	5.731047e+01	-7.471341e+00	3.357195e+01	-3.120763e+01	-1.497633e+01	-2.899423e+01	-2.878787e+01	-5.796202e+01
1.405000e+03	3.905784e+03	2.280992e+00	-5.403397e+01	7.215462e+01	-7.650916e+00	5.436173e+01	5.608157e+01	-6.807249e+01	-4.440038e+01	-9.630868e+00	7.990805e+01	1.403973e+01	5.810827e+01	-7.758100e+00	-2.609853e+01	-7.913311e+00	2.506299e-01	-3.359932e+01
1.406000e+03	3.880978e+03	1.262683e+02	-4.783793e-01	1.322877e+02	5.880472e+01	8.791613e+01	8.915500e+01	-4.399643e+01	-2.042431e+01	1.994849e+01	1.076321e+02	4.351950e+01	8.876417e+01	2.465312e+01	-3.906182e+01	2.118512e+01	3.760888e+01	-4.604925e-01
1.407000e+03	3.848478e+03	2.745345e+02	6.523920e+01	2.037879e+02	1.378144e+02	1.264740e+02	1.288401e+02	-1.411047e+01	1.027185e+01	5.496964e+01	1.391167e+02	7.935132e+01	1.244355e+02	6.467114e+01	-5.278701e+01	5.733341e+01	8.047192e+01	3.974029e+01
1.408000e+03	3.817768e+03	4.379080e+02	1.390953e+02	2.829917e+02	2.243981e+02	1.676989e+02	1.732930e+02	1.970351e+01	4.583331e+01	9.326393e+01	1.727384e+02	1.193936e+02	1.636000e+02	1.102556e+02	-6.541252e+01	9.885563e+01	1.255356e+02	8.464174e+01
1.409000e+03	3.796196e+03	6.051735e+02	2.161344e+02	3.651719e+02	3.125459e+02	2.088706e+02	2.197641e+02	5.510063e+01	8.377522e+01	1.323606e+02	2.065112e+02	1.610355e+02	2.041407e+02	1.586648e+02	-7.450174e+01	1.432516e+02	1.692899e+02	1.312587e+02
1.410000e+03	3.787447e+03	7.644228e+02	2.910736e+02	4.450040e+02	3.959533e+02	2.471411e+02	2.648522e+02	8.954036e+01	1.213425e+02	1.697320e+02	2.382531e+02	2.015348e+02	2.434751e+02	2.067562e+02	-7.743446e+01	1.874404e+02	2.085111e+02	1.763278e+02
1.411000e+03	3.791737e+03	9.054206e+02	3.593305e+02	5.176724e+02	4.692977e+02	2.800986e+02	3.051970e+02	1.207163e+02	1.560349e+02	2.032960e+02	2.660763e+02	2.386155e+02	2.790634e+02	2.516017e+02	-7.195601e+01	2.283916e+02	2.409064e+02	2.169688e+02
1.412000e+03	3.807169e+03	1.022090e+03	4.180745e+02	5.801753e+02	5.295641e+02	3.064264e+02	3.383627e+02	1.470013e+02	1.861076e+02	2.319667e+02	2.890022e+02	2.710740e+02	3.091072e+02	2.911782e+02	-5.680338e+01	2.639002e+02	2.656656e+02	2.514052e+02
1.413000e+03	3.831229e+03	1.113848e+03	4.667601e+02	6.321292e+02	5.767253e+02	3.263042e+02	3.634930e+02	1.677069e+02	2.108255e+02	2.559339e+02	3.073534e+02	2.990533e+02	3.330801e+02	3.247795e+02	-3.225382e+01	2.931200e+02	2.836074e+02	2.793709e+02
1.414000e+03	3.861445e+03	1.184916e+03	5.067927e+02	6.755381e+02	6.133114e+02	3.412656e+02	3.813819e+02	1.830245e+02	2.303476e+02	2.764440e+02	3.226375e+02	3.237676e+02	3.517722e+02	3.529023e+02	-3.934369e-01	3.165578e+02	2.967549e+02	3.019464e+02
1.415000e+03	3.894881e+03	1.241742e+03	5.404158e+02	7.135144e+02	6.429647e+02	3.534868e+02	3.938865e+02	1.936715e+02	2.453007e+02	2.951136e+02	3.368845e+02	3.467429e+02	3.667701e+02	3.766292e+02	3.506519e+01	3.355110e+02	3.074532e+02	3.208536e+02
1.416000e+03	3.926937e+03	1.289669e+03	5.693403e+02	7.485144e+02	6.686330e+02	3.647815e+02	4.029463e+02	2.004238e+02	2.562680e+02	3.130705e+02	3.516933e+02	3.689143e+02	3.795953e+02	3.968178e+02	6.945444e+01	3.512331e+02	3.173968e+02	3.375338e+02
1.417000e+03	3.950534e+03	1.330472e+03	5.937973e+02	7.809441e+02	6.912741e+02	3.757525e+02	4.096845e+02	2.037732e+02	2.634628e+02	3.303325e+02	3.674187e+02	3.900212e+02	3.909146e+02	4.135195e+02	9.815810e+01	3.642626e+02	3.270059e+02	3.524624e+02
1.418000e+03	3.956724e+03	1.361899e+03	6.124736e+02	8.088180e+02	7.096809e+02	3.854891e+02	4.140136e+02	2.038677e+02	2.667487e+02	3.457227e+02	3.828777e+02	4.086026e+02	4.002040e+02	4.259319e+02	1.176404e+02	3.742454e+02	3.354277e+02	3.650231e+02
1.419000e+03	3.937070e+03	1.379309e+03	6.233132e+02	8.286056e+02	7.214300e+02	3.919404e+02	4.148892e+02	2.007263e+02	2.659607e+02	3.573502e+02	3.957085e+02	4.225833e+02	4.060081e+02	4.328864e+02	1.261534e+02	3.802974e+02	3.411234e+02	3.739632e+02
1.420000e+03	3.887137e+03	1.378408e+03	6.247000e+02	8.367888e+02	7.243634e+02	3.927674e+02	4.110139e+02	1.945574e+02	2.612996e+02	3.633980e+02	4.032033e+02	4.301390e+02	4.066334e+02	4.335729e+02	1.239025e+02	3.816430e+02	3.427107e+02	3.781344e+02
1.421000e+03	3.809618e+03	1.357516e+03	6.163468e+02	8.313058e+02	7.177502e+02	3.862606e+02	4.015669e+02	1.859568e+02	2.535269e+02	3.628176e+02	4.032205e+02	4.303865e+02	4.009013e+02	4.280710e+02	1.126702e+02	3.781226e+02	3.396187e+02	3.770836e+02
1.422000e+03	3.715512e+03	1.318170e+03	5.993966e+02	8.121534e+02	7.024872e+02	3.719018e+02	3.865564e+02	1.758373e+02	2.438002e+02	3.555942e+02	3.947695e+02	4.235560e+02	3.885785e+02	4.173683e+02	9.510623e+01	3.702476e+02	3.322326e+02	3.711528e+02
1.423000e+03	3.622447e+03	1.263779e+03	5.756855e+02	7.808916e+02	6.802458e+02	3.503477e+02	3.666253e+02	1.651015e+02	2.332020e+02	3.424815e+02	3.780461e+02	4.105811e+02	3.702911e+02	4.028289e+02	7.398133e+01	3.587581e+02	3.214833e+02	3.610397e+02
1.424000e+03	3.550412e+03	1.197155e+03	5.465806e+02	7.393868e+02	6.520653e+02	3.229028e+02	3.424574e+02	1.542217e+02	2.221988e+02	3.243800e+02	3.539811e+02	3.923565e+02	3.470108e+02	3.853883e+02	5.165286e+01	3.439340e+02	3.081301e+02	3.470779e+02
1.425000e+03	3.516289e+03	1.118324e+03	5.120393e+02	6.885316e+02	6.172137e+02	2.907972e+02	3.141556e+02	1.429507e+02	2.103200e+02	3.017177e+02	3.236017e+02	3.690867e+02	3.194257e+02	3.649119e+02	2.984616e+01	3.250760e+02	2.921401e+02	3.286715e+02
1.426000e+03	3.529023e+03	1.023945e+03	4.704440e+02	6.276930e+02	5.730328e+02	2.546614e+02	2.809843e+02	1.303353e+02	1.962521e+02	2.741907e+02	2.875804e+02	3.401075e+02	2.875669e+02	3.400943e+02	9.702718e+00	3.005140e+02	2.725250e+02	3.042606e+02
1.427000e+03	3.587013e+03	9.088157e+02	4.193791e+02	5.552622e+02	5.159993e+02	2.144732e+02	2.416721e+02	1.150577e+02	1.783387e+02	2.410393e+02	2.462244e+02	3.043208e+02	2.509237e+02	3.090197e+02	-8.042443e+00	2.682393e+02	2.477695e+02	2.719301e+02
1.428000e+03	3.678389e+03	7.689233e+02	3.570516e+02	4.701076e+02	4.436192e+02	1.700023e+02	1.951787e+02	9.598063e+01	1.552919e+02	2.017590e+02	1.999078e+02	2.610711e+02	2.090201e+02	2.701822e+02	-2.289633e+01	2.269369e+02	2.166947e+02	2.304426e+02
1.429000e+03	3.783850e+03	6.046832e+02	2.837318e+02	3.732467e+02	3.563222e+02	1.215209e+02	1.415795e+02	7.267566e+01	1.268256e+02	1.569057e+02	1.496994e+02	2.110571e+02	1.621750e+02	2.235307e+02	-3.454164e+01	1.769664e+02	1.793705e+02	1.802372e+02
1.430000e+03	3.881015e+03	4.228419e+02	2.025483e+02	2.688947e+02	2.584556e+02	7.040282e+01	8.264821e+01	4.572404e+01	9.396540e+01	1.085826e+02	9.781219e+01	1.568260e+02	1.120561e+02	1.710674e+02	-4.287603e+01	1.208304e+02	1.376413e+02	1.239203e+02
1.431000e+03	3.949055e+03	2.360666e+02	1.192450e+02	1.642887e+02	1.578342e+02	1.928212e+01	2.184195e+01	1.668213e+01	5.893013e+01	6.031466e+01	4.756808e+01	1.025652e+02	6.171314e+01	1.167074e+02	-4.810328e+01	6.287720e+01	9.497371e+01	6.597577e+01
1.432000e+03	3.972544e+03	6.022680e+01	4.094353e+01	6.822069e+01	6.391633e+01	-2.835748e+01	-3.634503e+01	-1.225697e+01	2.464733e+01	1.629610e+01	2.797794e+00	5.320344e+01	1.500934e+01	6.541175e+01	-5.079614e+01	8.311374e+00	5.562148e+01	1.175800e+01
1.433000e+03	3.943865e+03	-8.964207e+01	-2.562605e+01	-1.121449e+01	-1.472856e+01	-6.902173e+01	-8.742789e+01	-3.875905e+01	-5.911254e+00	-1.971484e+01	-3.313048e+01	1.313628e+01	-2.435629e+01	2.190701e+01	-5.186253e+01	-3.811818e+01	2.340524e+01	-3.386359e+01
1.434000e+03	3.863931e+03	-2.031639e+02	-7.576292e+01	-6.879240e+01	-7.269380e+01	-1.001334e+02	-1.279887e+02	-6.081831e+01	-3.035352e+01	-4.540944e+01	-5.826573e+01	-1.494121e+01	-5.385455e+01	-1.053363e+01	-5.238938e+01	-7.326196e+01	5.822918e-01	-6.770360e+01
1.435000e+03	3.741332e+03	-2.768445e+02	-1.077260e+02	-1.034217e+02	-1.089060e+02	-1.206739e+02	-1.563748e+02	-7.706486e+01	-4.727784e+01	-6.044827e+01	-7.261395e+01	-3.065790e+01	-7.276544e+01	-3.081302e+01	-5.339531e+01	-9.614661e+01	-1.274710e+01	-8.887975e+01
1.436000e+03	3.590274e+03	-3.140377e+02	-1.227164e+02	-1.180662e+02	-1.263401e+02	-1.313070e+02	-1.728401e+02	-8.687151e+01	-5.639952e+01	-6.631705e+01	-7.804445e+01	-3.584196e+01	-8.222481e+01	-4.002588e+01	-5.557245e+01	-1.078477e+02	-1.848222e+01	-9.869023e+01
1.437000e+03	3.427847e+03	-3.229695e+02	-1.240777e+02	-1.184744e+02	-1.305502e+02	-1.339970e+02	-1.791667e+02	-9.031379e+01	-5.842707e+01	-6.565089e+01	-7.762404e+01	-3.376146e+01	-8.471313e+01	-4.085390e+01	-5.911564e+01	-1.108183e+02	-1.972406e+01	-9.989680e+01
1.438000e+03	3.271107e+03	-3.138692e+02	-1.161636e+02	-1.113304e+02	-1.277385e+02	-1.313422e+02	-1.779930e+02	-8.807443e+01	-5.478976e+01	-6.137421e+01	-7.467830e+01	-2.808729e+01	-8.324368e+01	-3.665569e+01	-6.371175e+01	-1.080229e+02	-1.971003e+01	-9.577481e+01
1.439000e+03	3.134431e+03	-2.964086e+02	-1.033512e+02	-1.025773e+02	-1.231608e+02	-1.259193e+02	-1.721291e+02	-8.135512e+01	-4.732747e+01	-5.602413e+01	-7.195559e+01	-2.199471e+01	-8.058423e+01	-3.062591e+01	-6.869823e+01	-1.022320e+02	-2.092522e+01	-8.931574e+01
1.440000e+03	3.027471e+03	-2.782249e+02	-8.947155e+01	-9.643199e+01	-1.203576e+02	-1.198505e+02	-1.640610e+02	-7.179144e+01	-3.801464e+01	-5.145727e+01	-7.115985e+01	-1.767914e+01	-7.875593e+01	-2.527724e+01	-7.332502e+01	-9.566596e+01	-2.468993e+01	-8.281188e+01
1.441000e+03	2.954048e+03	-2.645846e+02	-7.763215e+01	-9.518188e+01	-1.212117e+02	-1.146353e+02	-1.556962e+02	-6.131369e+01	-2.873559e+01	-4.889677e+01	-7.290204e+01	-1.631771e+01	-7.886878e+01	-2.228591e+01	-7.700324e+01	-8.995606e+01	-3.125558e+01	-7.781672e+01
1.442000e+03	2.912251e+03	-2.586767e+02	-7.019758e+01	-9.948341e+01	-1.264343e+02	-1.111482e+02	-1.482806e+02	-5.189817e+01	-2.109322e+01	-4.910432e+01	-7.692699e+01	-1.829865e+01	-8.119061e+01	-2.256322e+01	-7.942542e+01	-8.623529e+01	-4.020035e+01	-7.529281e+01
1.443000e+03	2.895869e+03	-2.618801e+02	-6.868529e+01	-1.087540e+02	-1.359827e+02	-1.096627e+02	-1.423768e+02	-4.521322e+01	-1.623500e+01	-5.244996e+01	-8.240033e+01	-2.347112e+01	-8.528942e+01	-2.636072e+01	-8.050089e+01	-8.516282e+01	-5.082241e+01	-7.572150e+01
1.444000e+03	2.896844e+03	-2.736490e+02	-7.349568e+01	-1.213892e+02	-1.491131e+02	-1.098288e+02	-1.378482e+02	-4.224511e+01	-1.470826e+01	-5.878682e+01	-8.810444e+01	-3.124932e+01	-9.014643e+01	-3.329154e+01	-8.014368e+01	-8.680512e+01	-6.231173e+01	-7.905427e+01
1.445000e+03	2.908043e+03	-2.911456e+02	-8.360698e+01	-1.348088e+02	-1.641222e+02	-1.106391e+02	-1.338756e+02	-4.303867e+01	-1.638554e+01	-6.722066e+01	-9.252934e+01	-4.056671e+01	-9.424787e+01	-4.228534e+01	-7.803475e+01	-9.045603e+01	-7.367107e+01	-8.455509e+01
1.446000e+03	2.925293e+03	-3.091100e+02	-9.648802e+01	-1.455563e+02	-1.781099e+02	-1.104961e+02	-1.290916e+02	-4.667139e+01	-2.050409e+01	-7.598311e+01	-9.396187e+01	-4.981474e+01	-9.574600e+01	-5.159901e+01	-7.351130e+01	-9.457741e+01	-8.353867e+01	-9.070716e+01
1.447000e+03	2.947824e+03	-3.204765e+02	-1.084430e+02	-1.497188e+02	-1.871545e+02	-1.074832e+02	-1.219001e+02	-5.149992e+01	-2.583656e+01	-8.260578e+01	-9.070496e+01	-5.694107e+01	-9.278041e+01	-5.901680e+01	-6.569057e+01	-9.702133e+01	-9.014072e+01	-9.536513e+01
1.448000e+03	2.976809e+03	-3.179202e+02	-1.154236e+02	-1.437735e+02	-1.870932e+02	-9.985639e+01	-1.109662e+02	-5.561434e+01	-3.096520e+01	-8.445808e+01	-8.148401e+01	-5.980737e+01	-8.396694e+01	-6.229078e+01	-5.382631e+01	-9.556627e+01	-9.153582e+01	-9.622010e+01
1.449000e+03	3.012614e+03	-2.960137e+02	-1.141182e+02	-1.257015e+02	-1.747671e+02	-8.664421e+01	-9.575145e+01	-5.735563e+01	-3.459328e+01	-7.952511e+01	-6.596113e+01	-5.676109e+01	-6.893957e+01	-5.974018e+01	-3.777318e+01	-8.863033e+01	-8.614701e+01	-9.147355e+01
1.450000e+03	3.052070e+03	-2.532642e+02	-1.029685e+02	-9.597672e+01	-1.492909e+02	-6.814622e+01	-7.689720e+01	-5.573299e+01	-3.581426e+01	-6.715502e+01	-4.515670e+01	-4.723472e+01	-4.873976e+01	-5.081854e+01	-1.835964e+01	-7.590362e+01	-7.339871e+01	-8.047988e+01
1.451000e+03	3.087273e+03	-1.932031e+02	-8.274772e+01	-5.797588e+01	-1.128038e+02	-4.610815e+01	-5.627159e+01	-5.062184e+01	-3.427509e+01	-4.847395e+01	-2.154566e+01	-3.212593e+01	-2.584685e+01	-3.642788e+01	2.514380e+00	-5.863468e+01	-5.418147e+01	-6.409187e+01
1.452000e+03	3.106844e+03	-1.239955e+02	-5.647563e+01	-1.752304e+01	-7.032351e+01	-2.344790e+01	-3.660536e+01	-4.270858e+01	-3.020566e+01	-2.627173e+01	1.310557e+00	-1.376803e+01	-3.751659e+00	-1.883090e+01	2.213384e+01	-3.942628e+01	-3.091013e+01	-4.454674e+01
1.453000e+03	3.099513e+03	-5.660113e+01	-2.868496e+01	1.839014e+01	-2.867955e+01	-3.577286e+00	-2.080846e+01	-3.323484e+01	-2.432456e+01	-4.362434e+00	1.954912e+01	4.547989e+00	1.384510e+01	-1.156475e+00	3.751439e+01	-2.159067e+01	-7.101968e+00	-2.491708e+01
1.454000e+03	3.058747e+03	-2.092393e+00	-4.284653e+00	4.332086e+01	5.118379e+00	1.046642e+01	-1.120125e+01	-2.364877e+01	-1.765711e+01	1.337038e+01	2.996916e+01	1.936148e+01	2.396132e+01	1.335348e+01	4.606003e+01	-8.294555e+00	1.340002e+01	-8.327289e+00
1.455000e+03	2.986586e+03	3.096507e+01	1.261073e+01	5.296039e+01	2.551141e+01	1.678416e+01	-8.935205e+00	-1.527803e+01	-1.131095e+01	2.391976e+01	3.084248e+01	2.788560e+01	2.507524e+01	2.211848e+01	4.612179e+01	-1.797298e+00	2.729627e+01	2.783740e+00
1.456000e+03	2.895037e+03	3.827874e+01	1.955148e+01	4.609680e+01	2.951503e+01	1.503177e+01	-1.378710e+01	-9.102652e+00	-6.249665e+00	2.579955e+01	2.230418e+01	2.865071e+01	1.744467e+01	2.379156e+01	3.729881e+01	-3.017615e+00	3.252083e+01	7.128003e+00
1.457000e+03	2.804337e+03	2.040617e+01	1.615373e+01	2.475598e+01	1.711101e+01	6.406291e+00	-2.433269e+01	-5.648710e+00	-3.094270e+00	1.924683e+01	6.243546e+00	2.179899e+01	2.953477e+00	1.850944e+01	2.042168e+01	-1.149117e+01	2.859097e+01	4.689158e+00
1.458000e+03	2.738556e+03	-1.767758e+01	4.058424e+00	-6.339771e+00	-8.985428e+00	-6.704289e+00	-3.834071e+01	-4.973849e+00	-1.972636e+00	6.030330e+00	-1.417817e+01	9.028989e+00	-1.537446e+01	7.833239e+00	-2.747702e+00	-2.560586e+01	1.660965e+01	-3.415234e+00
1.459000e+03	2.719910e+03	-6.756426e+01	-1.340505e+01	-4.066629e+01	-4.389651e+01	-2.121989e+01	-5.317469e+01	-6.698879e+00	-2.434164e+00	-1.097124e+01	-3.515052e+01	-6.709178e+00	-3.396500e+01	-5.523222e+00	-3.000564e+01	-4.292650e+01	-9.806616e-01	-1.517509e+01
1.460000e+03	2.763540e+03	-1.185965e+02	-3.172023e+01	-7.086881e+01	-8.126964e+01	-3.386207e+01	-6.608069e+01	-1.006179e+01	-3.452334e+00	-2.826798e+01	-5.279272e+01	-2.166114e+01	-4.921769e+01	-1.808591e+01	-5.926485e+01	-6.048762e+01	-2.079284e+01	-2.793602e+01
1.461000e+03	2.874167e+03	-1.592526e+02	-4.583065e+01	-8.975208e+01	-1.140858e+02	-4.160928e+01	-7.440750e+01	-1.401337e+01	-3.545868e+00	-4.228474e+01	-6.365121e+01	-3.181971e+01	-5.794437e+01	-2.611298e+01	-8.904760e+01	-7.508437e+01	-3.901266e+01	-3.868929e+01
1.462000e+03	3.045358e+03	-1.789887e+02	-5.099861e+01	-9.140628e+01	-1.357570e+02	-4.217561e+01	-7.591882e+01	-1.739866e+01	-1.044806e+00	-4.995380e+01	-6.519728e+01	-3.360218e+01	-5.781787e+01	-2.622325e+01	-1.187718e+02	-8.369862e+01	-5.206999e+01	-4.452664e+01
1.463000e+03	3.261250e+03	-1.706357e+02	-4.388172e+01	-7.252468e+01	-1.415834e+02	-3.454786e+01	-6.930594e+01	-1.924058e+01	5.506931e+00	-4.938879e+01	-5.638156e+01	-2.464326e+01	-4.789666e+01	-1.615918e+01	-1.487039e+02	-8.414851e+01	-5.744667e+01	-4.332554e+01
1.464000e+03	3.499888e+03	-1.328587e+02	-2.361379e+01	-3.365510e+01	-1.302755e+02	-1.946109e+01	-5.479719e+01	-1.906123e+01	1.688971e+01	-4.050386e+01	-3.813285e+01	-4.554624e+00	-2.911673e+01	4.460388e+00	-1.795276e+02	-7.584150e+01	-5.444547e+01	-3.452678e+01
1.465000e+03	3.737085e+03	-7.154957e+01	7.566593e+00	2.021951e+01	-1.048495e+02	4.728512e-01	-3.452932e+01	-1.708986e+01	3.283966e+01	-2.527367e+01	-1.350201e+01	2.465442e+01	-4.451595e+00	3.370351e+01	-2.116163e+02	-6.027720e+01	-4.458294e+01	-1.964479e+01
1.466000e+03	3.949960e+03	1.079949e+00	4.464234e+01	8.042760e+01	-7.213930e+01	2.127909e+01	-1.229306e+01	-1.418907e+01	5.195342e+01	-7.311891e+00	1.286774e+01	5.882943e+01	2.158174e+01	6.754198e+01	-2.442691e+02	-4.088519e+01	-3.126320e+01	-2.099873e+00
1.467000e+03	4.119837e+03	7.015372e+01	8.129989e+01	1.368948e+02	-4.064080e+01	3.883288e+01	7.496314e+00	-1.143184e+01	7.197539e+01	9.323558e+00	3.601600e+01	9.272987e+01	4.414953e+01	1.008619e+02	-2.752666e+02	-2.201397e+01	-1.863393e+01	1.380498e+01
1.468000e+03	4.234616e+03	1.235339e+02	1.121864e+02	1.813698e+02	-1.728369e+01	5.042261e+01	2.130617e+01	-9.456038e+00	9.040879e+01	2.177664e+01	5.233101e+01	1.216408e+02	5.971531e+01	1.290236e+02	-3.010508e+02	-7.340601e+00	-9.947967e+00	2.449061e+01
1.469000e+03	4.290721e+03	1.566521e+02	1.350038e+02	2.102619e+02	-4.512036e+00	5.597572e+01	2.778400e+01	-7.905572e+00	1.052018e+02	2.980108e+01	6.089578e+01	1.429080e+02	6.734243e+01	1.493532e+02	-3.175962e+02	1.608724e+00	-6.123505e+00	2.860227e+01
1.470000e+03	4.294266e+03	1.741942e+02	1.513483e+02	2.256370e+02	7.897281e-01	5.824841e+01	2.811024e+01	-5.310017e+00	1.151683e+02	3.617915e+01	6.378851e+01	1.566573e+02	6.897103e+01	1.618385e+02	-3.217193e+02	6.040533e+00	-5.251821e+00	2.761708e+01
1.471000e+03	4.260603e+03	1.872920e+02	1.656628e+02	2.336307e+02	5.716531e+00	6.168633e+01	2.507490e+01	4.077292e-01	1.198996e+02	4.576237e+01	6.502989e+01	1.652544e+02	6.837051e+01	1.685937e+02	-3.123187e+02	9.150772e+00	-3.434173e+00	2.512265e+01
1.472000e+03	4.211483e+03	2.071127e+02	1.825829e+02	2.408070e+02	1.761160e+01	7.032224e+01	2.122243e+01	1.091663e+01	1.191873e+02	6.339502e+01	6.854585e+01	1.716660e+02	6.913808e+01	1.722571e+02	-2.910089e+02	1.429542e+01	3.316565e+00	2.499073e+01
1.473000e+03	4.169967e+03	2.377730e+02	2.038548e+02	2.501480e+02	3.987590e+01	8.563184e+01	1.697159e+01	2.637274e+01	1.122714e+02	9.158286e+01	7.607605e+01	1.774820e+02	7.266569e+01	1.740707e+02	-2.618443e+02	2.292328e+01	1.695260e+01	2.927842e+01
1.474000e+03	4.154552e+03	2.721008e+02	2.263399e+02	2.586788e+02	6.936025e+01	1.053790e+02	9.706388e+00	4.474834e+01	9.736556e+01	1.289738e+02	8.605746e+01	1.815916e+02	7.708918e+01	1.726225e+02	-2.302210e+02	3.330246e+01	3.605679e+01	3.688141e+01
1.475000e+03	4.174912e+03	2.924617e+02	2.421598e+02	2.579707e+02	9.664080e+01	1.240452e+02	-5.642028e+00	6.195697e+01	7.177767e+01	1.703816e+02	9.405265e+01	1.802029e+02	7.777157e+01	1.639212e+02	-2.014026e+02	4.069603e+01	5.594244e+01	4.360425e+01
1.476000e+03	4.231413e+03	2.763275e+02	2.409849e+02	2.372957e+02	1.090366e+02	1.346742e+02	-3.478843e+01	7.278178e+01	3.261730e+01	2.083671e+02	9.451259e+01	1.682032e+02	6.909740e+01	1.427875e+02	-1.792498e+02	3.890651e+01	7.012630e+01	4.359204e+01
1.477000e+03	4.319018e+03	2.039299e+02	2.134248e+02	1.878634e+02	9.489871e+01	1.312867e+02	-8.196418e+01	7.225767e+01	-2.225563e+01	2.356799e+02	8.299961e+01	1.411673e+02	4.670177e+01	1.048691e+02	-1.655912e+02	2.243131e+01	7.246233e+01	3.139880e+01
1.478000e+03	4.433966e+03	6.452991e+01	1.540242e+02	1.061214e+02	4.721846e+01	1.108076e+02	-1.484821e+02	5.698798e+01	-9.349621e+01	2.475198e+02	5.781871e+01	9.703639e+01	9.090793e+00	4.830824e+01	-1.603453e+02	-1.176766e+01	5.898002e+01	3.723185e+00
1.479000e+03	4.579966e+03	-1.410864e+02	6.272630e+01	-5.248213e+00	-3.483286e+01	7.377688e+01	-2.325536e+02	2.596902e+01	-1.800295e+02	2.427551e+02	2.038823e+01	3.675764e+01	-4.200020e+01	-2.563096e+01	-1.621673e+02	-6.357341e+01	2.873383e+01	-3.987115e+01
1.480000e+03	4.770433e+03	-4.020899e+02	-5.543952e+01	-1.386899e+02	-1.466290e+02	2.376647e+01	-3.301903e+02	-1.923202e+01	-2.792247e+02	2.237846e+02	-2.563292e+01	-3.620679e+01	-1.024778e+02	-1.130518e+02	-1.692265e+02	-1.301708e+02	-1.646508e+01	-9.733057e+01
1.481000e+03	5.024849e+03	-7.013692e+02	-1.918417e+02	-2.844045e+02	-2.802075e+02	-3.399463e+01	-4.364812e+02	-7.482609e+01	-3.871620e+02	1.953197e+02	-7.586218e+01	-1.170144e+02	-1.673852e+02	-2.085376e+02	-1.797703e+02	-2.071660e+02	-7.304805e+01	-1.651256e+02
1.482000e+03	5.360021e+03	-1.019309e+03	-3.359789e+02	-4.327973e+02	-4.265352e+02	-9.407625e+01	-5.464935e+02	-1.354365e+02	-4.986907e+02	1.627111e+02	-1.265773e+02	-2.005407e+02	-2.322522e+02	-3.062159e+02	-1.923330e+02	-2.897061e+02	-1.368348e+02	-2.392725e+02
1.483000e+03	5.779621e+03	-1.336204e+03	-4.768384e+02	-5.758028e+02	-5.770528e+02	-1.518633e+02	-6.554690e+02	-1.948356e+02	-6.072786e+02	1.304395e+02	-1.754358e+02	-2.820004e+02	-2.937983e+02	-4.003632e+02	-2.056636e+02	-3.731668e+02	-2.038904e+02	-3.159467e+02
1.484000e+03	6.266704e+03	-1.633369e+03	-6.038426e+02	-7.070445e+02	-7.243564e+02	-2.039989e+02	-7.585474e+02	-2.467423e+02	-7.050034e+02	1.011599e+02	-2.214440e+02	-3.570973e+02	-3.499431e+02	-4.855970e+02	-2.185573e+02	-4.533899e+02	-2.709694e+02	-3.916671e+02
1.485000e+03	6.783122e+03	-1.893981e+03	-7.077441e+02	-8.214535e+02	-8.623969e+02	-2.484238e+02	-8.505687e+02	-2.857154e+02	-7.831500e+02	7.540467e+01	-2.644391e+02	-4.220254e+02	-3.994239e+02	-5.570110e+02	-2.297497e+02	-5.267420e+02	-3.356564e+02	-4.633005e+02
1.486000e+03	7.277082e+03	-2.104492e+03	-7.817496e+02	-9.150245e+02	-9.866131e+02	-2.842449e+02	-9.263820e+02	-3.081077e+02	-8.336250e+02	5.187380e+01	-3.044492e+02	-4.736384e+02	-4.413814e+02	-6.105718e+02	-2.379274e+02	-5.902655e+02	-3.963482e+02	-5.281430e+02
1.487000e+03	7.696549e+03	-2.256513e+03	-8.227218e+02	-9.849531e+02	-1.094075e+03	-3.115405e+02	-9.816612e+02	-3.128820e+02	-8.508891e+02	2.816515e+01	-3.411754e+02	-5.098364e+02	-4.751114e+02	-6.437738e+02	-2.418184e+02	-6.419579e+02	-4.521180e+02	-5.841193e+02
1.488000e+03	8.003502e+03	-2.348128e+03	-8.318905e+02	-1.029885e+03	-1.183395e+03	-3.310593e+02	-1.013814e+03	-3.019685e+02	-8.336680e+02	1.774831e+00	-3.736701e+02	-5.299189e+02	-4.999597e+02	-6.562103e+02	-2.403063e+02	-6.809823e+02	-5.024140e+02	-6.299336e+02
1.489000e+03	8.183439e+03	-2.383527e+03	-8.144732e+02	-1.049828e+03	-1.254141e+03	-3.437485e+02	-1.022467e+03	-2.798921e+02	-7.856332e+02	-2.884312e+01	-4.001887e+02	-5.345784e+02	-5.152430e+02	-6.496347e+02	-2.325505e+02	-7.075636e+02	-5.465808e+02	-6.649716e+02
1.490000e+03	8.246529e+03	-2.370637e+03	-7.780384e+02	-1.045529e+03	-1.305844e+03	-3.501640e+02	-1.009257e+03	-2.526467e+02	-7.146255e+02	-6.341634e+01	-4.182108e+02	-5.253896e+02	-5.201319e+02	-6.273128e+02	-2.181371e+02	-7.225115e+02	-5.833391e+02	-6.889211e+02
1.491000e+03	8.220347e+03	-2.317638e+03	-7.300815e+02	-1.017531e+03	-1.337039e+03	-3.499665e+02	-9.770803e+02	-2.261124e+02	-6.306296e+02	-9.945560e+01	-4.246651e+02	-5.039677e+02	-5.135542e+02	-5.928588e+02	-1.972770e+02	-7.265705e+02	-6.104780e+02	-7.013096e+02
1.492000e+03	8.137600e+03	-2.229954e+03	-6.757388e+02	-9.654524e+02	-1.344939e+03	-3.417652e+02	-9.292246e+02	-2.045407e+02	-5.432470e+02	-1.324954e+02	-4.163937e+02	-4.711972e+02	-4.942455e+02	-5.490508e+02	-1.710084e+02	-7.199550e+02	-6.249963e+02	-7.012639e+02
1.493000e+03	8.024051e+03	-2.109152e+03	-6.165642e+02	-8.879816e+02	-1.326090e+03	-3.234746e+02	-8.688436e+02	-1.896339e+02	-4.595848e+02	-1.569825e+02	-3.908216e+02	-4.269298e+02	-4.610410e+02	-4.971508e+02	-1.413036e+02	-7.023507e+02	-6.237528e+02	-6.877049e+02
1.494000e+03	7.891276e+03	-1.954247e+03	-5.508554e+02	-7.837584e+02	-1.277860e+03	-2.931525e+02	-7.989492e+02	-1.805102e+02	-3.832305e+02	-1.676274e+02	-3.467189e+02	-3.703453e+02	-4.134015e+02	-4.370291e+02	-1.109722e+02	-6.734222e+02	-6.044528e+02	-6.599559e+02
1.495000e+03	7.736414e+03	-1.764807e+03	-4.753799e+02	-6.529518e+02	-1.200215e+03	-2.500890e+02	-7.228069e+02	-1.745013e+02	-3.144991e+02	-1.608826e+02	-2.848989e+02	-3.008790e+02	-3.520601e+02	-3.680410e+02	-8.330874e+01	-6.335975e+02	-5.666320e+02	-6.185069e+02
1.496000e+03	7.548048e+03	-1.544485e+03	-3.878166e+02	-4.990225e+02	-1.097009e+03	-1.958030e+02	-6.444001e+02	-1.684250e+02	-2.516681e+02	-1.361494e+02	-2.086998e+02	-2.193922e+02	-2.796166e+02	-2.903096e+02	-6.153398e+01	-5.847426e+02	-5.122808e+02	-5.655750e+02
1.497000e+03	7.315029e+03	-1.303450e+03	-2.889898e+02	-3.300374e+02	-9.762088e+02	-1.345979e+02	-5.686143e+02	-1.598421e+02	-1.926378e+02	-9.635226e+01	-1.241096e+02	-1.291485e+02	-2.008743e+02	-2.059137e+02	-4.815275e+01	-5.303640e+02	-4.458586e+02	-5.051549e+02
1.498000e+03	7.034405e+03	-1.058601e+03	-1.840592e+02	-1.589185e+02	-8.487564e+02	-7.342721e+01	-5.009298e+02	-1.478784e+02	-1.364096e+02	-4.764940e+01	-3.940536e+01	-3.618186e+01	-1.227216e+02	-1.194989e+02	-4.439023e+01	-4.751470e+02	-3.736229e+02	-4.424347e+02
1.499000e+03	6.715647e+03	-8.311763e+02	-8.218007e+01	-2.201880e+00	-7.262694e+02	-2.097842e+01	-4.466187e+02	-1.334029e+02	-8.391892e+01	1.739481e+00	3.580039e+01	5.122182e+01	-5.340869e+01	-3.798839e+01	-4.985082e+01	-4.238958e+02	-3.023871e+02	-3.826761e+02
1.500000e+03	6.380292e+03	-6.422774e+02	5.348294e+00	1.227388e+02	-6.181654e+02	1.390599e+01	-4.096406e+02	-1.186103e+02	-3.800625e+01	4.335537e+01	9.209994e+01	1.239577e+02	-1.204511e+00	3.065160e+01	-6.249961e+01	-3.801866e+02	-2.379925e+02	-3.298663e+02
1.501000e+03	6.057918e+03	-5.075679e+02	6.790367e+01	2.014960e+02	-5.290986e+02	2.414059e+01	-3.915677e+02	-1.062483e+02	-2.595943e+00	7.050050e+01	1.222052e+02	1.741511e+02	2.735782e+01	7.930165e+01	-7.900307e+01	-3.452037e+02	-1.839086e+02	-2.855779e+02
1.502000e+03	5.780219e+03	-4.329249e+02	9.840667e+01	2.264012e+02	-4.576374e+02	6.140697e+00	-3.909151e+02	-9.881077e+01	1.858759e+01	7.981998e+01	1.227680e+02	1.972168e+02	2.919547e+01	1.036418e+02	-9.538933e+01	-3.172325e+02	-1.404185e+02	-2.484710e+02
1.503000e+03	5.574803e+03	-4.126966e+02	9.522295e+01	1.989360e+02	-3.968218e+02	-3.914889e+01	-4.031815e+02	-9.796638e+01	2.329090e+01	7.193296e+01	9.548478e+01	1.931889e+02	5.755885e+00	1.034573e+02	-1.079023e+02	-2.920974e+02	-1.047374e+02	-2.147149e+02
1.504000e+03	5.459717e+03	-4.314744e+02	6.240211e+01	1.297007e+02	-3.366479e+02	-1.063486e+02	-4.217266e+02	-1.043506e+02	1.153919e+01	5.086390e+01	4.695126e+01	1.667524e+02	-3.704526e+01	8.275330e+01	-1.138469e+02	-2.645131e+02	-7.214683e+01	-1.793149e+02
1.505000e+03	5.439400e+03	-4.690270e+02	8.179812e+00	3.567070e+01	-2.677994e+02	-1.869443e+02	-4.393478e+02	-1.176863e+02	-1.426643e+01	2.244737e+01	-1.289321e+01	1.258660e+02	-9.019099e+01	4.856581e+01	-1.121877e+02	-2.299562e+02	-3.785413e+01	-1.379774e+02
1.506000e+03	5.502787e+03	-5.067402e+02	-5.763256e+01	-6.446114e+01	-1.853593e+02	-2.714496e+02	-4.501484e+02	-1.370736e+02	-4.991502e+01	-7.716183e+00	-7.335359e+01	7.944108e+01	-1.438997e+02	8.892821e+00	-1.037064e+02	-1.864162e+02	1.046908e+00	-8.888669e+01
1.507000e+03	5.624454e+03	-5.331578e+02	-1.263007e+02	-1.552112e+02	-9.109385e+01	-3.517253e+02	-4.511106e+02	-1.612534e+02	-9.032334e+01	-3.597568e+01	-1.257541e+02	3.495292e+01	-1.901631e+02	-2.945795e+01	-9.064570e+01	-1.353633e+02	4.426007e+01	-3.371257e+01
1.508000e+03	5.769242e+03	-5.464471e+02	-1.918286e+02	-2.276917e+02	6.670623e+00	-4.226327e+02	-4.427913e+02	-1.887099e+02	-1.304707e+02	-6.135602e+01	-1.654088e+02	-3.118605e+00	-2.245734e+02	-6.228476e+01	-7.593625e+01	-8.151794e+01	8.817923e+01	2.260269e+01
1.509000e+03	5.899653e+03	-5.528270e+02	-2.511059e+02	-2.802876e+02	9.565952e+01	-4.824171e+02	-4.288098e+02	-2.175933e+02	-1.660560e+02	-8.504774e+01	-1.920810e+02	-3.351246e+01	-2.467768e+02	-8.820962e+01	-6.225989e+01	-3.144447e+01	1.270943e+02	7.328005e+01
1.510000e+03	5.983938e+03	-5.617042e+02	-3.027475e+02	-3.166207e+02	1.638280e+02	-5.317200e+02	-4.142236e+02	-2.455699e+02	-1.937998e+02	-1.089454e+02	-2.088331e+02	-5.717754e+01	-2.594463e+02	-1.077919e+02	-5.126328e+01	8.546331e+00	1.552714e+02	1.118724e+02
1.511000e+03	6.002171e+03	-5.796748e+02	-3.454202e+02	-3.419235e+02	2.035202e+02	-5.716978e+02	-4.033408e+02	-2.697668e+02	-2.114857e+02	-1.339324e+02	-2.198262e+02	-7.565360e+01	-2.662745e+02	-1.221030e+02	-4.318144e+01	3.441984e+01	1.690894e+02	1.343608e+02
1.512000e+03	5.948205e+03	-6.060042e+02	-3.766100e+02	-3.595064e+02	2.140295e+02	-6.021199e+02	-3.977836e+02	-2.869643e+02	-2.179033e+02	-1.587047e+02	-2.280241e+02	-8.964609e+01	-2.698665e+02	-1.314895e+02	-3.697195e+01	4.562685e+01	1.683911e+02	1.403939e+02
1.513000e+03	5.827273e+03	-6.314830e+02	-3.924761e+02	-3.687729e+02	2.016634e+02	-6.203270e+02	-3.955624e+02	-2.940860e+02	-2.128099e+02	-1.796646e+02	-2.337190e+02	-9.839086e+01	-2.703898e+02	-1.350624e+02	-3.087156e+01	4.509569e+01	1.565558e+02	1.332449e+02
1.514000e+03	5.650896e+03	-6.410475e+02	-3.888542e+02	-3.654097e+02	1.774431e+02	-6.215505e+02	-3.915343e+02	-2.888956e+02	-1.969312e+02	-1.919218e+02	-2.343836e+02	-9.995968e+01	-2.654592e+02	-1.310358e+02	-2.314811e+01	3.809066e+01	1.393403e+02	1.185853e+02
1.515000e+03	5.431845e+03	-6.189875e+02	-3.629117e+02	-3.434099e+02	1.534596e+02	-6.004942e+02	-3.790883e+02	-2.706890e+02	-1.719447e+02	-1.909663e+02	-2.257758e+02	-9.222414e+01	-2.511959e+02	-1.176443e+02	-1.278351e+01	3.043648e+01	1.230111e+02	1.026193e+02
1.516000e+03	5.181360e+03	-5.546514e+02	-3.146972e+02	-2.979263e+02	1.392769e+02	-5.535532e+02	-3.524432e+02	-2.407260e+02	-1.403672e+02	-1.743297e+02	-2.037723e+02	-7.397317e+01	-2.239638e+02	-9.416420e+01	1.160353e-01	2.677789e+01	1.124873e+02	9.029293e+01
1.517000e+03	4.909216e+03	-4.465938e+02	-2.479306e+02	-2.278180e+02	1.395266e+02	-4.808041e+02	-3.087558e+02	-2.022103e+02	-1.053086e+02	-1.426221e+02	-1.662183e+02	-4.572273e+01	-1.821061e+02	-6.160938e+01	1.427276e+01	2.942452e+01	1.100910e+02	8.414588e+01
1.518000e+03	4.625466e+03	-3.039146e+02	-1.697439e+02	-1.370528e+02	1.532231e+02	-3.870185e+02	-2.493556e+02	-1.597758e+02	-7.011169e+01	-9.963261e+01	-1.141816e+02	-9.970898e+00	-1.270924e+02	-2.288006e+01	2.753308e+01	3.802925e+01	1.151836e+02	8.403983e+01
1.519000e+03	4.341825e+03	-1.445989e+02	-8.948875e+01	-3.461202e+01	1.746809e+02	-2.813246e+02	-1.797481e+02	-1.186051e+02	-3.794779e+01	-5.154167e+01	-5.224825e+01	2.911317e+01	-6.373502e+01	1.762859e+01	3.741085e+01	5.003422e+01	1.246374e+02	8.766044e+01
1.520000e+03	4.071214e+03	8.477693e+00	-1.699163e+01	6.702195e+01	1.955232e+02	-1.755918e+02	-1.084211e+02	-8.342472e+01	-1.144616e+01	-5.546439e+00	1.220596e+01	6.642970e+01	5.833519e-01	5.480963e+01	4.174195e+01	6.162411e+01	1.338908e+02	9.149800e+01
1.521000e+03	3.825384e+03	1.327435e+02	3.929246e+01	1.544074e+02	2.071513e+02	-8.198742e+01	-4.481474e+01	-5.764162e+01	7.587189e+00	3.170404e+01	7.057839e+01	9.693058e+01	5.746896e+01	8.382382e+01	3.929334e+01	6.887678e+01	1.382672e+02	9.198078e+01
1.522000e+03	3.611972e+03	2.110398e+02	7.382759e+01	2.161076e+02	2.030919e+02	-1.038296e+01	2.964900e+00	-4.281940e+01	1.833888e+01	5.548724e+01	1.150268e+02	1.166435e+02	9.945731e+01	1.010766e+02	3.016466e+01	6.883535e+01	1.342499e+02	8.649337e+01
1.523000e+03	3.432887e+03	2.353916e+02	8.493314e+01	2.453131e+02	1.806987e+02	3.366390e+01	3.004201e+01	-3.858720e+01	2.103742e+01	6.389406e+01	1.403263e+02	1.235170e+02	1.217901e+02	1.049832e+02	1.584775e+01	6.027255e+01	1.204201e+02	7.407582e+01
1.524000e+03	3.285214e+03	2.084100e+02	7.488882e+01	2.413332e+02	1.417743e+02	4.977453e+01	3.571979e+01	-4.296422e+01	1.687005e+01	5.801698e+01	1.450237e+02	1.178500e+02	1.234779e+02	9.630620e+01	-1.111195e+00	4.396268e+01	9.780594e+01	5.564504e+01
1.525000e+03	3.164438e+03	1.418245e+02	4.913474e+01	2.094092e+02	9.186165e+01	4.221914e+01	2.319828e+01	-5.299367e+01	7.752832e+00	4.138010e+01	1.314960e+02	1.021257e+02	1.072783e+02	7.790974e+01	-1.777660e+01	2.235963e+01	6.949684e+01	3.365238e+01
1.526000e+03	3.068466e+03	5.248916e+01	1.472397e+01	1.588219e+02	3.833589e+01	1.819901e+01	-1.821982e+00	-6.551402e+01	-4.036874e+00	1.875910e+01	1.048865e+02	8.023568e+01	7.858091e+01	5.393143e+01	-3.161733e+01	-1.261628e+00	3.959306e+01	1.123366e+01
1.527000e+03	3.000457e+03	-4.287702e+01	-2.155251e+01	9.991563e+01	-1.212059e+01	-1.444396e+01	-3.313478e+01	-7.786619e+01	-1.630445e+01	-5.249622e+00	7.131222e+01	5.631183e+01	4.359787e+01	2.859865e+01	-4.116583e+01	-2.394038e+01	1.181650e+01	-8.901220e+00
1.528000e+03	2.969175e+03	-1.323975e+02	-5.479084e+01	4.111023e+01	-5.574807e+01	-4.929471e+01	-6.588560e+01	-8.835907e+01	-2.734828e+01	-2.744390e+01	3.601879e+01	3.356682e+01	7.536498e+00	5.085619e+00	-4.631944e+01	-4.403498e+01	-1.171468e+01	-2.544546e+01
1.529000e+03	2.986802e+03	-2.115477e+02	-8.283859e+01	-1.301424e+01	-9.277362e+01	-8.255393e+01	-9.763042e+01	-9.639976e+01	-3.621580e+01	-4.662391e+01	2.159071e+00	1.356018e+01	-2.658259e+01	-1.518038e+01	-4.819616e+01	-6.170079e+01	-3.107223e+01	-3.894880e+01
1.530000e+03	3.065297e+03	-2.827056e+02	-1.061794e+02	-6.195126e+01	-1.268788e+02	-1.130924e+02	-1.282846e+02	-1.023121e+02	-4.273254e+01	-6.344781e+01	-2.942763e+01	-3.867958e+00	-5.809289e+01	-3.253205e+01	-4.862702e+01	-7.864061e+01	-4.823504e+01	-5.154258e+01
1.531000e+03	3.212719e+03	-3.521945e+02	-1.270027e+02	-1.079328e+02	-1.633012e+02	-1.415776e+02	-1.591175e+02	-1.069651e+02	-4.731626e+01	-7.968737e+01	-5.949590e+01	-2.003788e+01	-8.790592e+01	-4.844669e+01	-4.949206e+01	-9.722783e+01	-6.606770e+01	-6.602950e+01
1.532000e+03	3.430503e+03	-4.262266e+02	-1.479072e+02	-1.537634e+02	-2.063663e+02	-1.691957e+02	-1.913195e+02	-1.113686e+02	-5.066735e+01	-9.724079e+01	-8.917019e+01	-3.653852e+01	-1.172372e+02	-6.460433e+01	-5.213791e+01	-1.193651e+02	-8.699328e+01	-8.469999e+01
1.533000e+03	3.711994e+03	-5.074414e+02	-1.707448e+02	-2.008091e+02	-2.574496e+02	-1.965366e+02	-2.247919e+02	-1.163514e+02	-5.345948e+01	-1.172865e+02	-1.188010e+02	-5.439312e+01	-1.464293e+02	-8.202028e+01	-5.705048e+01	-1.455420e+02	-1.118980e+02	-1.083463e+02
1.534000e+03	4.042168e+03	-5.932936e+02	-1.959540e+02	-2.479300e+02	-3.141417e+02	-2.230274e+02	-2.576556e+02	-1.223646e+02	-5.612957e+01	-1.398259e+02	-1.473723e+02	-7.358885e+01	-1.743551e+02	-1.005708e+02	-6.384043e+01	-1.744540e+02	-1.396772e+02	-1.358492e+02
1.535000e+03	4.398600e+03	-6.766607e+02	-2.224684e+02	-2.916536e+02	-3.708586e+02	-2.470007e+02	-2.866384e+02	-1.293899e+02	-5.880625e+01	-1.636639e+02	-1.726383e+02	-9.307760e+01	-1.985899e+02	-1.190287e+02	-7.148625e+01	-2.033012e+02	-1.675467e+02	-1.644633e+02
1.536000e+03	4.753944e+03	-7.481623e+02	-2.480792e+02	-3.273541e+02	-4.205718e+02	-2.662354e+02	-3.081335e+02	-1.369236e+02	-6.135889e+01	-1.867224e+02	-1.918515e+02	-1.111545e+02	-2.162129e+02	-1.355158e+02	-7.871194e+01	-2.286198e+02	-1.919418e+02	-1.906520e+02
1.537000e+03	5.080045e+03	-7.991805e+02	-2.700535e+02	-3.508683e+02	-4.569709e+02	-2.786864e+02	-3.194823e+02	-1.440400e+02	-6.352483e+01	-2.065310e+02	-2.027282e+02	-1.260123e+02	-2.248679e+02	-1.481523e+02	-8.436662e+01	-2.473262e+02	-2.096360e+02	-2.111416e+02
1.538000e+03	5.353055e+03	-8.245715e+02	-2.858560e+02	-3.599443e+02	-4.763425e+02	-2.831445e+02	-3.200064e+02	-1.495735e+02	-6.508294e+01	-2.207752e+02	-2.042744e+02	-1.362810e+02	-2.236729e+02	-1.556803e+02	-8.770958e+01	-2.576366e+02	-2.186995e+02	-2.238550e+02
1.539000e+03	5.558212e+03	-8.244556e+02	-2.939071e+02	-3.551390e+02	-4.787049e+02	-2.796818e+02	-3.114809e+02	-1.524522e+02	-6.606330e+01	-2.278459e+02	-1.972228e+02	-1.414532e+02	-2.136925e+02	-1.579243e+02	-8.856105e+01	-2.596448e+02	-2.190564e+02	-2.285071e+02
1.540000e+03	5.692780e+03	-8.049619e+02	-2.943348e+02	-3.400884e+02	-4.681079e+02	-2.698581e+02	-2.980192e+02	-1.521500e+02	-6.698557e+01	-2.273510e+02	-1.840422e+02	-1.421829e+02	-1.979089e+02	-1.560515e+02	-8.732862e+01	-2.555125e+02	-2.125947e+02	-2.268263e+02
1.541000e+03	5.766473e+03	-7.781085e+02	-2.896053e+02	-3.212865e+02	-4.522758e+02	-2.567297e+02	-2.855541e+02	-1.491339e+02	-6.908755e+01	-2.205191e+02	-1.686381e+02	-1.404693e+02	-1.808175e+02	-1.526511e+02	-8.494243e+01	-2.493446e+02	-2.029340e+02	-2.224750e+02
1.542000e+03	5.799777e+03	-7.609709e+02	-2.848111e+02	-3.075332e+02	-4.418098e+02	-2.446838e+02	-2.811557e+02	-1.451185e+02	-7.445680e+01	-2.103553e+02	-1.559049e+02	-1.396904e+02	-1.678407e+02	-1.516290e+02	-8.272396e+01	-2.468289e+02	-1.949868e+02	-2.207403e+02
1.543000e+03	5.821183e+03	-7.740457e+02	-2.873390e+02	-3.090725e+02	-4.490137e+02	-2.390604e+02	-2.923018e+02	-1.429544e+02	-8.594683e+01	-2.013929e+02	-1.512107e+02	-1.443821e+02	-1.646866e+02	-1.578611e+02	-8.219021e+01	-2.546364e+02	-1.943859e+02	-2.279731e+02
1.544000e+03	5.863948e+03	-8.385328e+02	-3.057342e+02	-3.363070e+02	-4.862375e+02	-2.454846e+02	-3.260252e+02	-1.460853e+02	-1.067824e+02	-1.989521e+02	-1.597804e+02	-1.596461e+02	-1.766567e+02	-1.765258e+02	-8.478280e+01	-2.794949e+02	-2.067534e+02	-2.506843e+02
1.545000e+03	5.961983e+03	-9.724073e+02	-3.478304e+02	-3.979984e+02	-5.636486e+02	-2.688821e+02	-3.877837e+02	-1.576686e+02	-1.398462e+02	-2.079843e+02	-1.859038e+02	-1.901589e+02	-2.078361e+02	-2.120946e+02	-9.153361e+01	-3.268879e+02	-2.367729e+02	-2.942549e+02
1.546000e+03	6.144027e+03	-1.185702e+03	-4.185359e+02	-4.990939e+02	-6.866164e+02	-3.122872e+02	-4.800291e+02	-1.796046e+02	-1.867669e+02	-2.317690e+02	-2.319805e+02	-2.389283e+02	-2.601641e+02	-2.671152e+02	-1.027303e+02	-3.995124e+02	-2.871169e+02	-3.614156e+02
1.547000e+03	6.426090e+03	-1.476141e+03	-5.179104e+02	-6.386706e+02	-8.533285e+02	-3.757309e+02	-6.007585e+02	-2.117863e+02	-2.470499e+02	-2.708604e+02	-2.975891e+02	-3.061210e+02	-3.325510e+02	-3.410859e+02	-1.176958e+02	-4.958886e+02	-3.574529e+02	-4.508999e+02
1.548000e+03	6.804028e+03	-1.826731e+03	-6.402058e+02	-8.087358e+02	-1.053552e+03	-4.556007e+02	-7.426249e+02	-2.518358e+02	-3.175478e+02	-3.226578e+02	-3.789241e+02	-3.883669e+02	-4.203739e+02	-4.298194e+02	-1.348051e+02	-6.096817e+02	-4.438831e+02	-5.568203e+02
1.549000e+03	7.249760e+03	-2.206749e+03	-7.743259e+02	-9.945755e+02	-1.269376e+03	-5.448204e+02	-8.932417e+02	-2.954525e+02	-3.925241e+02	-3.818015e+02	-4.689541e+02	-4.788704e+02	-5.157141e+02	-5.256324e+02	-1.518001e+02	-7.302216e+02	-5.391672e+02	-6.692132e+02
1.550000e+03	7.714519e+03	-2.576648e+03	-9.057388e+02	-1.176941e+03	-1.478220e+03	-6.339816e+02	-1.037016e+03	-3.373020e+02	-4.644188e+02	-4.413196e+02	-5.584718e+02	-5.684339e+02	-6.085199e+02	-6.184833e+02	-1.663593e+02	-8.443521e+02	-6.338803e+02	-7.758407e+02
1.551000e+03	8.140136e+03	-2.896004e+03	-1.019400e+03	-1.335719e+03	-1.657542e+03	-7.132251e+02	-1.158268e+03	-3.722006e+02	-5.252116e+02	-4.941884e+02	-6.378766e+02	-6.471972e+02	-6.885388e+02	-6.978599e+02	-1.767605e+02	-9.392287e+02	-7.183252e+02	-8.648443e+02
1.552000e+03	8.475648e+03	-3.132352e+03	-1.102884e+03	-1.454108e+03	-1.789903e+03	-7.743582e+02	-1.244779e+03	-3.962490e+02	-5.680666e+02	-5.348176e+02	-6.991983e+02	-7.066331e+02	-7.474950e+02	-7.549296e+02	-1.824118e+02	-1.005235e+03	-7.846799e+02	-9.274482e+02
1.553000e+03	8.693432e+03	-3.268082e+03	-1.148799e+03	-1.521983e+03	-1.866721e+03	-8.125340e+02	-1.290592e+03	-4.075831e+02	-5.888055e+02	-5.599934e+02	-7.376907e+02	-7.412138e+02	-7.807907e+02	-7.843129e+02	-1.840487e+02	-1.038048e+03	-8.286839e+02	-9.598060e+02
1.554000e+03	8.798474e+03	-3.303071e+03	-1.155767e+03	-1.537315e+03	-1.889374e+03	-8.269164e+02	-1.297044e+03	-4.065321e+02	-5.867620e+02	-5.690052e+02	-7.524217e+02	-7.492330e+02	-7.881045e+02	-7.849144e+02	-1.834936e+02	-1.039130e+03	-8.502549e+02	-9.633611e+02
1.555000e+03	8.826973e+03	-3.252142e+03	-1.127709e+03	-1.505173e+03	-1.867284e+03	-8.201116e+02	-1.271640e+03	-3.951718e+02	-5.647297e+02	-5.629797e+02	-7.456503e+02	-7.325354e+02	-7.726586e+02	-7.595421e+02	-1.830305e+02	-1.014505e+03	-8.527881e+02	-9.436397e+02
1.556000e+03	8.834950e+03	-3.138344e+03	-1.071735e+03	-1.434722e+03	-1.813718e+03	-7.966211e+02	-1.225213e+03	-3.764608e+02	-5.279905e+02	-5.437451e+02	-7.212763e+02	-6.952725e+02	-7.394688e+02	-7.134631e+02	-1.845961e+02	-9.723342e+02	-8.413917e+02	-9.079857e+02
1.557000e+03	8.881816e+03	-2.984625e+03	-9.954326e+02	-1.335461e+03	-1.740929e+03	-7.609762e+02	-1.168452e+03	-3.532810e+02	-4.827087e+02	-5.127251e+02	-6.830483e+02	-6.421504e+02	-6.933263e+02	-6.524264e+02	-1.890727e+02	-9.201980e+02	-8.207368e+02	-8.631085e+02
[truncated: 2,443 more rows]
