# Supplementary material for: Unravelling Mn4Ca cluster vibrations in the S1, S2 and S3 states of the Kok–Joliot cycle of photosystem II
Source: Royal Society of Chemistry journal article supplement (doi:10.1039/d4cp01307g), 2024-01-01
Supplement: d4cp01307g4.csv [file d4cp01307g4.csv]

#wavenumber	Full-system	Mn4CaO5	Diamond1	Diamnond2	Diamond3	Diamond4	Diamond5	Mn1-O1	Mn1-O2	Mn2-O1	Mn2-O2	Mn3-O2	Mn3-O3	Mn3-O3	Mn3-O4	Mn4-O4	Mn4-O5
0.000000e+00	1.412757e+02	-8.867584e+02	-5.076128e+02	-5.675820e+02	-6.745938e+02	-2.460657e+02	-2.942693e+02	-2.830156e+02	-2.595240e+02	-2.480890e+02	-2.225666e+02	-3.429844e+02	-3.450152e+02	-2.885500e+02	-2.962927e+02	-3.783013e+02	-4.188978e+02
1.000000e+00	1.544790e+02	-9.541622e+02	-5.464901e+02	-6.107895e+02	-7.257895e+02	-2.647175e+02	-3.166650e+02	-3.048445e+02	-2.794795e+02	-2.670108e+02	-2.395838e+02	-3.691435e+02	-3.712055e+02	-3.105680e+02	-3.189584e+02	-4.068313e+02	-4.504504e+02
2.000000e+00	1.604052e+02	-9.698762e+02	-5.559127e+02	-6.209494e+02	-7.376705e+02	-2.690055e+02	-3.219024e+02	-3.102974e+02	-2.844085e+02	-2.715044e+02	-2.436636e+02	-3.753336e+02	-3.772855e+02	-3.157975e+02	-3.244014e+02	-4.132693e+02	-4.574839e+02
3.000000e+00	1.587313e+02	-9.325476e+02	-5.350990e+02	-5.972011e+02	-7.092469e+02	-2.585500e+02	-3.095221e+02	-2.989265e+02	-2.739116e+02	-2.611875e+02	-2.344541e+02	-3.610281e+02	-3.627467e+02	-3.037964e+02	-3.121597e+02	-3.970873e+02	-4.393888e+02
4.000000e+00	1.504327e+02	-8.496800e+02	-4.883088e+02	-5.443493e+02	-6.462756e+02	-2.354254e+02	-2.820041e+02	-2.730902e+02	-2.501628e+02	-2.381462e+02	-2.138148e+02	-3.291303e+02	-3.305342e+02	-2.770033e+02	-2.847250e+02	-3.615507e+02	-3.997666e+02
5.000000e+00	1.374574e+02	-7.353335e+02	-4.235248e+02	-4.713903e+02	-5.594992e+02	-2.035230e+02	-2.440075e+02	-2.372201e+02	-2.172340e+02	-2.062909e+02	-1.852401e+02	-2.850853e+02	-2.861500e+02	-2.399901e+02	-2.467754e+02	-3.127238e+02	-3.453391e+02
6.000000e+00	1.221711e+02	-6.062996e+02	-3.502703e+02	-3.890645e+02	-4.617239e+02	-1.674922e+02	-2.011029e+02	-1.966066e+02	-1.799797e+02	-1.702906e+02	-1.529056e+02	-2.354006e+02	-2.361587e+02	-1.982182e+02	-2.039015e+02	-2.578226e+02	-2.841293e+02
7.000000e+00	1.067834e+02	-4.781646e+02	-2.773727e+02	-3.073385e+02	-3.648130e+02	-1.316528e+02	-1.584672e+02	-1.561538e+02	-1.428938e+02	-1.344790e+02	-1.206897e+02	-1.861193e+02	-1.866486e+02	-1.567575e+02	-1.612935e+02	-2.035196e+02	-2.235816e+02
8.000000e+00	9.293821e+01	-3.624927e+02	-2.113774e+02	-2.336057e+02	-2.775379e+02	-9.921733e+01	-1.199465e+02	-1.194962e+02	-1.093019e+02	-1.020756e+02	-9.147859e+01	-1.417243e+02	-1.421270e+02	-1.193690e+02	-1.228049e+02	-1.547330e+02	-1.692077e+02
9.000000e+00	8.155505e+01	-2.657197e+02	-1.559408e+02	-1.719822e+02	-2.047394e+02	-7.198582e+01	-8.768613e+01	-8.866241e+01	-8.105553e+01	-7.488525e+01	-6.689851e+01	-1.047037e+02	-1.050835e+02	-8.814414e+01	-9.058560e+01	-1.141538e+02	-1.240439e+02
1.000000e+01	7.289876e+01	-1.896133e+02	-1.121117e+02	-1.236020e+02	-1.476872e+02	-5.047124e+01	-6.227801e+01	-6.423374e+01	-5.868160e+01	-5.343014e+01	-4.743622e+01	-7.572391e+01	-7.616565e+01	-6.365216e+01	-6.523695e+01	-8.245022e+01	-8.885931e+01
1.100000e+01	6.678470e+01	-1.326694e+02	-7.913341e+01	-8.750909e+01	-1.051553e+02	-3.428222e+01	-4.322028e+01	-4.579238e+01	-4.179654e+01	-3.733686e+01	-3.278520e+01	-5.416801e+01	-5.472381e+01	-4.539374e+01	-4.627495e+01	-5.888035e+01	-6.282030e+01
1.200000e+01	6.281537e+01	-9.171480e+01	-5.534258e+01	-6.167714e+01	-7.465541e+01	-2.256238e+01	-2.944719e+01	-3.242331e+01	-2.956859e+01	-2.577398e+01	-2.223487e+01	-3.875784e+01	-3.944221e+01	-3.232149e+01	-3.265881e+01	-4.199657e+01	-4.426950e+01
1.300000e+01	6.057481e+01	-6.318835e+01	-3.886814e+01	-4.382209e+01	-5.341947e+01	-1.434149e+01	-1.975566e+01	-2.310184e+01	-2.107265e+01	-1.779548e+01	-1.497271e+01	-2.805577e+01	-2.884933e+01	-2.325716e+01	-2.320967e+01	-3.020979e+01	-3.136244e+01
1.400000e+01	5.975136e+01	-4.388341e+01	-2.801449e+01	-3.187429e+01	-3.896991e+01	-8.739935e+00	-1.305738e+01	-1.690328e+01	-1.547899e+01	-1.253549e+01	-1.025087e+01	-2.076307e+01	-2.162339e+01	-1.713668e+01	-1.685295e+01	-2.211694e+01	-2.245414e+01
1.500000e+01	6.019088e+01	-3.120314e+01	-2.137060e+01	-2.414566e+01	-2.931478e+01	-5.039630e+00	-8.471794e+00	-1.305792e+01	-1.209707e+01	-9.273527e+00	-7.436198e+00	-1.583297e+01	-1.670944e+01	-1.309977e+01	-1.270571e+01	-1.660906e+01	-1.624940e+01
1.600000e+01	6.189656e+01	-2.311047e+01	-1.776084e+01	-1.930959e+01	-2.290970e+01	-2.670892e+00	-5.318188e+00	-1.091746e+01	-1.033668e+01	-7.424152e+00	-5.994200e+00	-1.246620e+01	-1.331537e+01	-1.048271e+01	-1.007147e+01	-1.283823e+01	-1.179534e+01
1.700000e+01	6.499078e+01	-1.796810e+01	-1.615489e+01	-1.631383e+01	-1.853517e+01	-1.168279e+00	-3.068611e+00	-9.900575e+00	-9.651415e+00	-6.503464e+00	-5.456811e+00	-1.005950e+01	-1.085700e+01	-8.774409e+00	-8.403812e+00	-1.013136e+01	-8.403605e+00
1.800000e+01	6.965065e+01	-1.440400e+01	-1.561321e+01	-1.430503e+01	-1.519179e+01	-1.332200e-01	-1.304358e+00	-9.462769e+00	-9.509069e+00	-6.104134e+00	-5.404511e+00	-8.154576e+00	-8.900511e+00	-7.574720e+00	-7.275288e+00	-7.916513e+00	-5.566625e+00
1.900000e+01	7.602588e+01	-1.126135e+01	-1.529308e+01	-1.259395e+01	-1.205669e+01	7.792132e-01	3.050575e-01	-9.106221e+00	-9.405664e+00	-5.887410e+00	-5.470763e+00	-6.407069e+00	-7.123175e+00	-6.569706e+00	-6.361579e+00	-5.695121e+00	-2.902027e+00
2.000000e+01	8.414816e+01	-7.629768e+00	-1.450125e+01	-1.065598e+01	-8.498756e+00	1.849209e+00	2.000092e+00	-8.421551e+00	-8.915259e+00	-5.585991e+00	-5.361065e+00	-4.576253e+00	-5.294906e+00	-5.521910e+00	-5.435119e+00	-3.063646e+00	-1.336031e-01
2.100000e+01	9.384553e+01	-2.919246e+00	-1.276072e+01	-8.147779e+00	-4.126219e+00	3.267426e+00	3.916805e+00	-7.139981e+00	-7.752413e+00	-5.008309e+00	-4.873302e+00	-2.527006e+00	-3.274466e+00	-4.268102e+00	-4.358938e+00	2.327108e-01	2.898344e+00
2.200000e+01	1.046823e+02	3.072232e+00	-9.858696e+00	-4.921164e+00	1.166590e+00	5.111612e+00	6.074287e+00	-5.171750e+00	-5.819869e+00	-4.038836e+00	-3.908520e+00	-2.341761e-01	-1.012632e+00	-2.718554e+00	-3.076170e+00	4.242749e+00	6.213163e+00
2.300000e+01	1.159533e+02	1.014003e+01	-5.854218e+00	-1.021948e+00	7.182024e+00	7.338898e+00	8.377368e+00	-2.612695e+00	-3.219841e+00	-2.634391e+00	-2.467016e+00	2.219621e+00	1.445081e+00	-8.551178e-01	-1.595930e+00	8.777939e+00	9.671434e+00
2.400000e+01	1.267611e+02	1.772808e+01	-1.038457e+00	3.333699e+00	1.345034e+01	9.803099e+00	1.064323e+01	2.876886e-01	-2.203160e-01	-8.181591e-01	-6.295936e-01	4.659895e+00	3.963304e+00	1.273484e+00	2.196225e-02	1.342835e+01	1.297929e+01
2.500000e+01	1.361912e+02	2.505959e+01	4.145723e+00	7.809172e+00	1.931497e+01	1.229843e+01	1.265201e+01	3.190337e+00	2.816607e+00	1.329096e+00	1.473468e+00	6.853837e+00	6.335714e+00	3.561633e+00	1.682662e+00	1.763227e+01	1.572625e+01
2.600000e+01	1.435644e+02	3.131979e+01	9.208261e+00	1.202201e+01	2.406170e+01	1.462149e+01	1.421101e+01	5.745700e+00	5.524395e+00	3.683844e+00	3.701188e+00	8.559498e+00	8.320831e+00	5.864714e+00	3.273354e+00	2.078829e+01	1.745647e+01
2.700000e+01	1.487071e+02	3.584554e+01	1.371622e+01	1.563122e+01	2.706522e+01	1.663449e+01	1.521344e+01	7.665193e+00	7.613653e+00	6.102544e+00	5.940583e+00	9.580237e+00	9.690641e+00	8.024461e+00	4.681476e+00	2.238367e+01	1.776061e+01
2.800000e+01	1.521491e+02	3.826600e+01	1.737046e+01	1.841321e+01	2.791540e+01	1.830743e+01	1.566946e+01	8.764407e+00	8.922106e+00	8.448330e+00	8.133393e+00	9.807202e+00	1.027982e+01	9.895534e+00	5.810346e+00	2.210497e+01	1.636538e+01
2.900000e+01	1.551622e+02	3.854619e+01	2.003187e+01	2.029696e+01	2.648602e+01	1.971888e+01	1.569373e+01	8.967238e+00	9.420198e+00	1.061165e+01	1.027803e+01	9.232360e+00	1.001894e+01	1.136330e+01	6.586497e+00	1.989942e+01	1.319457e+01
3.000000e+01	1.595949e+02	3.691415e+01	2.169047e+01	2.133927e+01	2.292478e+01	2.100655e+01	1.544791e+01	8.275513e+00	9.175081e+00	1.251537e+01	1.240087e+01	7.924325e+00	8.938389e+00	1.234535e+01	6.956731e+00	1.596794e+01	8.381538e+00
3.100000e+01	1.675261e+02	3.369641e+01	2.239561e+01	2.164757e+01	1.757161e+01	2.227718e+01	1.505482e+01	6.724515e+00	8.291434e+00	1.410416e+01	1.450593e+01	5.976473e+00	7.141626e+00	1.277913e+01	6.881791e+00	1.068971e+01	2.227229e+00
3.200000e+01	1.808258e+02	2.912776e+01	2.218823e+01	2.128786e+01	1.084092e+01	2.350538e+01	1.451594e+01	4.353743e+00	6.857405e+00	1.533081e+01	1.652730e+01	3.453370e+00	4.760546e+00	1.260918e+01	6.341368e+00	4.499448e+00	-4.885234e+00
3.300000e+01	2.007499e+02	2.321998e+01	2.108058e+01	2.023019e+01	3.118574e+00	2.446216e+01	1.366836e+01	1.217590e+00	4.923019e+00	1.615755e+01	1.831450e+01	3.671867e-01	1.915670e+00	1.179200e+01	5.363747e+00	-2.245264e+00	-1.259345e+01
3.400000e+01	2.276909e+02	1.575554e+01	1.910664e+01	1.837028e+01	-5.283755e+00	2.471006e+01	1.220755e+01	-2.558938e+00	2.524806e+00	1.658181e+01	1.966848e+01	-3.295297e+00	-1.298215e+00	1.032847e+01	4.079313e+00	-9.363151e+00	-2.064367e+01
3.500000e+01	2.611587e+02	6.422494e+00	1.642394e+01	1.562704e+01	-1.410254e+01	2.368058e+01	9.780509e+00	-6.702266e+00	-2.521051e-01	1.667602e+01	2.042053e+01	-7.499150e+00	-4.793501e+00	8.316267e+00	2.775959e+00	-1.687857e+01	-2.893386e+01
3.600000e+01	2.999945e+02	-4.955380e+00	1.340811e+01	1.207128e+01	-2.304573e+01	2.082037e+01	6.126012e+00	-1.073507e+01	-3.205311e+00	1.661338e+01	2.052032e+01	-1.207184e+01	-8.449031e+00	5.997198e+00	1.919036e+00	-2.496485e+01	-3.749293e+01
3.700000e+01	3.427385e+02	-1.818234e+01	1.066894e+01	8.017584e+00	-3.171140e+01	1.576560e+01	1.216678e+00	-1.399147e+01	-5.981317e+00	1.665021e+01	2.008870e+01	-1.664273e+01	-1.207110e+01	3.768726e+00	2.101307e+00	-3.381279e+01	-4.639469e+01
3.800000e+01	3.880230e+02	-3.254409e+01	8.944740e+00	4.022565e+00	-3.954893e+01	8.492246e+00	-4.649579e+00	-1.572713e+01	-8.109938e+00	1.705462e+01	1.940319e+01	-2.064915e+01	-1.538059e+01	2.139213e+00	3.912817e+00	-4.346185e+01	-5.562363e+01
3.900000e+01	4.348389e+02	-4.681340e+01	8.886329e+00	7.749699e-01	-4.588866e+01	-6.040009e-01	-1.084761e+01	-1.530881e+01	-9.115406e+00	1.800167e+01	1.881278e+01	-2.341996e+01	-1.803776e+01	1.628751e+00	7.758092e+00	-5.364687e+01	-6.492646e+01
4.000000e+01	4.825769e+02	-5.941576e+01	1.079729e+01	-1.086728e+00	-5.003181e+01	-1.072393e+01	-1.652180e+01	-1.242961e+01	-8.681538e+00	1.947876e+01	1.860978e+01	-2.431338e+01	-1.969645e+01	2.640598e+00	1.368092e+01	-6.371287e+01	-7.369133e+01
4.100000e+01	5.308294e+02	-6.870981e+01	1.442295e+01	-1.158638e+00	-5.136455e+01	-2.077697e+01	-2.075625e+01	-7.279491e+00	-6.824324e+00	2.124721e+01	1.890463e+01	-2.286079e+01	-2.006320e+01	5.341590e+00	2.126797e+01	-7.263268e+01	-8.089384e+01
4.200000e+01	5.790609e+02	-7.330530e+01	1.886783e+01	6.160935e-01	-4.945059e+01	-2.956583e+01	-2.276761e+01	-6.132839e-01	-4.017322e+00	2.288508e+01	1.954971e+01	-1.886471e+01	-1.893355e+01	9.588744e+00	2.968336e+01	-7.913412e+01	-8.513489e+01
4.300000e+01	6.263332e+02	-7.233587e+01	2.267906e+01	3.952882e+00	-4.407045e+01	-3.600369e+01	-2.206400e+01	6.307883e+00	-1.223924e+00	2.390292e+01	2.014113e+01	-1.241797e+01	-1.618818e+01	1.492586e+01	3.784266e+01	-8.191330e+01	-8.477609e+01
4.400000e+01	6.712722e+02	-6.562072e+01	2.408394e+01	8.350046e+00	-3.520358e+01	-3.931601e+01	-1.852681e+01	1.188959e+01	1.896702e-01	2.389421e+01	2.010249e+01	-3.843983e+00	-1.175239e+01	2.065478e+01	4.468347e+01	-7.988725e+01	-7.815897e+01
4.500000e+01	7.123587e+02	-5.367766e+01	2.133283e+01	1.328791e+01	-2.297478e+01	-3.917947e+01	-1.239850e+01	1.445656e+01	-1.337220e+00	2.266998e+01	1.882948e+01	6.411963e+00	-5.541534e+00	2.596724e+01	4.945100e+01	-7.242600e+01	-6.387924e+01
4.600000e+01	7.484610e+02	-3.758194e+01	1.308093e+01	1.843086e+01	-7.596164e+00	-3.576091e+01	-4.187190e+00	1.254425e+01	-7.252960e+00	2.033382e+01	1.585625e+01	1.789447e+01	2.574620e+00	3.010875e+01	5.190756e+01	-5.950396e+01	-4.107493e+01
4.700000e+01	7.793786e+02	-1.869635e+01	-1.260137e+00	2.375818e+01	1.067334e+01	-2.963966e+01	5.481246e+00	5.192696e+00	-1.853543e+01	1.727522e+01	1.099891e+01	3.021127e+01	1.275925e+01	3.253761e+01	5.239613e+01	-4.172305e+01	-9.677783e+00
4.800000e+01	8.061163e+02	1.672054e+00	-2.126690e+01	2.957307e+01	3.154511e+01	-2.162504e+01	1.602404e+01	-7.794662e+00	-3.535178e+01	1.408480e+01	4.439036e+00	4.304551e+01	2.513397e+01	3.304125e+01	5.173387e+01	-2.018905e+01	2.942541e+01
4.900000e+01	8.306939e+02	2.260676e+01	-4.540485e+01	3.638013e+01	5.469781e+01	-1.251227e+01	2.703667e+01	-2.567509e+01	-5.682099e+01	1.141605e+01	-3.272403e+00	5.611005e+01	3.965243e+01	3.177997e+01	5.096495e+01	3.732555e+00	7.436579e+01
5.000000e+01	8.554825e+02	4.380945e+01	-7.113411e+01	4.466884e+01	7.975298e+01	-2.845441e+00	3.837094e+01	-4.673328e+01	-8.096527e+01	9.831066e+00	-1.128962e+01	6.906977e+01	5.595832e+01	2.924575e+01	5.104739e+01	2.870529e+01	1.224201e+02
5.100000e+01	8.822592e+02	6.562978e+01	-9.524140e+01	5.467794e+01	1.062207e+02	7.234111e+00	5.013487e+01	-6.844707e+01	-1.049133e+02	9.671844e+00	-1.860733e+01	8.147232e+01	7.328509e+01	2.614768e+01	5.257253e+01	5.364786e+01	1.702819e+02
5.200000e+01	9.113097e+02	8.884943e+01	-1.143726e+02	6.622937e+01	1.334123e+02	1.799040e+01	6.260585e+01	-8.787343e+01	-1.253658e+02	1.099313e+01	-2.422981e+01	9.272847e+01	9.045897e+01	2.325824e+01	5.560849e+01	7.780349e+01	2.144371e+02
5.300000e+01	9.409213e+02	1.142497e+02	-1.256770e+02	7.869992e+01	1.603417e+02	2.992314e+01	7.606447e+01	-1.022091e+02	-1.392545e+02	1.357741e+01	-2.734375e+01	1.021677e+02	1.060434e+02	2.126557e+01	5.971865e+01	1.006228e+02	2.515887e+02
5.400000e+01	9.675000e+02	1.420792e+02	-1.274199e+02	9.114688e+01	1.856676e+02	4.346098e+01	9.057734e+01	-1.094031e+02	-1.444467e+02	1.702669e+01	-2.746525e+01	1.091636e+02	1.186119e+02	2.066949e+01	6.414297e+01	1.215245e+02	2.790685e+02
5.500000e+01	9.863438e+02	1.715999e+02	-1.193954e+02	1.025394e+02	2.077376e+02	5.861076e+01	1.057810e+02	-1.086477e+02	-1.402924e+02	2.089695e+01	-2.453460e+01	1.132869e+02	1.270737e+02	2.173602e+01	6.806712e+01	1.396704e+02	2.951758e+02
5.600000e+01	9.928712e+02	2.008954e+02	-1.030074e+02	1.120023e+02	2.247746e+02	7.469030e+01	1.207392e+02	-1.005843e+02	-1.278302e+02	2.482278e+01	-1.893761e+01	1.144252e+02	1.309397e+02	2.449825e+01	7.087159e+01	1.539029e+02	2.993891e+02
5.700000e+01	9.839254e+02	2.270605e+02	-8.097143e+01	1.189815e+02	2.351880e+02	9.026494e+01	1.339512e+02	-8.713813e+01	-1.095566e+02	2.858506e+01	-1.144399e+01	1.128146e+02	1.304253e+02	2.877865e+01	7.227124e+01	1.629167e+02	2.924107e+02
5.800000e+01	9.587182e+02	2.467751e+02	-5.670460e+01	1.232845e+02	2.379378e+02	1.033553e+02	1.435670e+02	-7.101878e+01	-8.880883e+01	3.210411e+01	-3.068350e+00	1.089701e+02	1.263527e+02	3.421530e+01	7.231575e+01	1.656221e+02	2.760354e+02
5.900000e+01	9.190866e+02	2.571367e+02	-3.356872e+01	1.250221e+02	2.328414e+02	1.118957e+02	1.478081e+02	-5.503984e+01	-6.894898e+01	3.538013e+01	5.121942e+00	1.035508e+02	1.199000e+02	4.029618e+01	7.129251e+01	1.615490e+02	2.528634e+02
6.000000e+01	8.689849e+02	2.565202e+02	-1.417893e+01	1.245170e+02	2.207227e+02	1.143274e+02	1.455114e+02	-4.147174e+01	-5.260655e+01	3.842747e+01	1.221189e+01	9.722401e+01	1.123049e+02	4.642204e+01	6.961148e+01	1.511113e+02	2.259117e+02
6.100000e+01	8.134275e+02	2.451997e+02	3.919258e-02	1.222443e+02	2.033492e+02	1.101427e+02	1.366340e+02	-3.161946e+01	-4.120667e+01	4.124572e+01	1.760815e+01	9.058551e+01	1.046360e+02	5.201373e+01	6.773698e+01	1.356123e+02	1.981962e+02
6.200000e+01	7.573012e+02	2.255144e+02	8.948447e+00	1.188242e+02	1.831686e+02	1.001823e+02	1.225200e+02	-2.572357e+01	-3.489195e+01	4.384024e+01	2.112792e+01	8.415218e+01	9.769624e+01	5.665318e+01	6.617793e+01	1.169908e+02	1.723607e+02
6.300000e+01	7.044812e+02	2.014883e+02	1.347388e+01	1.150321e+02	1.629176e+02	8.654805e+01	1.057730e+02	-2.316092e+01	-3.279614e+01	4.626988e+01	2.298172e+01	7.839737e+01	9.205038e+01	6.021488e+01	6.549482e+01	9.742294e+01	1.504128e+02
6.400000e+01	6.575079e+02	1.779756e+02	1.516629e+01	1.117687e+02	1.452031e+02	7.211713e+01	8.970340e+01	-2.282313e+01	-3.351403e+01	4.868018e+01	2.365434e+01	7.377939e+01	8.811439e+01	6.293056e+01	6.626639e+01	7.893680e+01	1.335978e+02
6.500000e+01	6.177931e+02	1.595571e+02	1.571174e+01	1.099524e+02	1.321468e+02	5.978504e+01	7.748646e+01	-2.351409e+01	-3.557697e+01	5.128859e+01	2.371958e+01	7.072670e+01	8.623285e+01	6.534655e+01	6.898996e+01	6.315696e+01	1.224051e+02
6.600000e+01	5.860898e+02	1.494950e+02	1.652469e+01	1.103439e+02	1.251499e+02	5.168025e+01	7.130774e+01	-2.423976e+01	-3.779061e+01	5.431520e+01	2.364525e+01	6.957964e+01	8.669873e+01	6.817494e+01	7.394265e+01	5.120738e+01	1.166661e+02
6.700000e+01	5.628882e+02	1.490470e+02	1.850230e+01	1.133626e+02	1.247928e+02	4.861797e+01	7.180240e+01	-2.433885e+01	-3.938152e+01	5.788375e+01	2.364644e+01	7.052171e+01	8.971630e+01	7.208530e+01	8.106815e+01	4.372467e+01	1.157027e+02
6.800000e+01	5.485278e+02	1.573307e+02	2.195089e+01	1.189706e+02	1.308609e+02	4.998232e+01	7.799661e+01	-2.347996e+01	-3.998428e+01	6.193513e+01	2.362752e+01	7.354006e+01	9.534327e+01	7.750676e+01	8.994940e+01	4.091157e+01	1.184946e+02
6.900000e+01	5.430457e+02	1.717617e+02	2.664950e+01	1.266754e+02	1.424745e+02	5.406768e+01	8.775928e+01	-2.159424e+01	-3.954288e+01	6.619236e+01	2.322386e+01	7.843203e+01	1.034518e+02	8.450083e+01	9.988395e+01	4.259057e+01	1.238592e+02
7.000000e+01	5.459770e+02	1.888986e+02	3.199759e+01	1.356435e+02	1.582809e+02	5.873769e+01	9.856566e+01	-1.880902e+01	-3.819563e+01	7.019322e+01	2.192310e+01	8.483732e+01	1.137207e+02	9.272767e+01	1.100212e+02	4.825969e+01	1.306351e+02
7.100000e+01	5.563611e+02	2.053934e+02	3.719414e+01	1.448565e+02	1.766517e+02	6.214803e+01	1.082573e+02	-1.541324e+01	-3.618176e+01	7.337592e+01	1.922351e+01	9.224959e+01	1.256334e+02	1.014851e+02	1.194851e+02	5.716645e+01	1.378381e+02
7.200000e+01	5.730782e+02	2.187098e+02	4.139927e+01	1.532147e+02	1.958075e+02	6.327365e+01	1.155101e+02	-1.184769e+01	-3.377841e+01	7.517771e+01	1.477757e+01	9.996813e+01	1.384374e+02	1.097758e+02	1.274141e+02	6.839327e+01	1.447241e+02
7.300000e+01	5.954223e+02	2.273690e+02	4.383649e+01	1.595234e+02	2.138140e+02	6.207865e+01	1.198769e+02	-8.695194e+00	-3.126479e+01	7.510129e+01	8.475832e+00	1.069921e+02	1.510478e+02	1.163668e+02	1.328995e+02	8.091443e+01	1.507002e+02
7.400000e+01	6.236413e+02	2.306798e+02	4.381095e+01	1.623780e+02	2.284560e+02	5.931774e+01	1.214687e+02	-6.650725e+00	-2.891202e+01	7.272298e+01	4.479116e-01	1.119166e+02	1.619303e+02	1.198443e+02	1.348740e+02	9.358192e+01	1.550823e+02
7.500000e+01	6.591384e+02	2.281397e+02	4.065483e+01	1.600491e+02	2.370881e+02	5.609342e+01	1.204875e+02	-6.465718e+00	-2.699817e+01	6.765299e+01	-9.010275e+00	1.129288e+02	1.690595e+02	1.187026e+02	1.320471e+02	1.050409e+02	1.567966e+02
7.600000e+01	7.041396e+02	2.188450e+02	3.365512e+01	1.505142e+02	2.366329e+02	5.336170e+01	1.168552e+02	-8.869595e+00	-2.583816e+01	5.949325e+01	-1.954341e+01	1.079896e+02	1.700576e+02	1.115201e+02	1.229868e+02	1.136461e+02	1.541971e+02
7.700000e+01	7.608397e+02	2.012617e+02	2.204855e+01	1.317444e+02	2.238845e+02	5.156684e+01	1.101034e+02	-1.446951e+01	-2.580189e+01	4.785040e+01	-3.082199e+01	9.522639e+01	1.625663e+02	9.723886e+01	1.063870e+02	1.174976e+02	1.451797e+02
7.800000e+01	8.302535e+02	1.735610e+02	5.157770e+00	1.022496e+02	1.961804e+02	5.051494e+01	9.955248e+01	-2.362565e+01	-2.728570e+01	3.244343e+01	-4.255935e+01	7.346613e+01	1.448088e+02	7.550420e+01	8.148107e+01	1.146994e+02	1.276771e+02
7.900000e+01	9.111433e+02	1.344858e+02	-1.731217e+01	6.175908e+01	1.523415e+02	4.950569e+01	8.468945e+01	-3.630555e+01	-3.061454e+01	1.330235e+01	-5.444563e+01	4.276552e+01	1.162044e+02	4.696505e+01	4.848625e+01	1.038554e+02	1.004599e+02
8.000000e+01	9.994303e+02	8.447164e+01	-4.487960e+01	1.182914e+01	9.362403e+01	4.766459e+01	6.559149e+01	-5.194113e+01	-3.588595e+01	-8.993648e+00	-6.602436e+01	4.767353e+00	7.785319e+01	1.342227e+01	8.933417e+00	8.469075e+01	6.400561e+01
8.100000e+01	1.088401e+03	2.660349e+01	-7.593106e+01	-4.384340e+01	2.433692e+01	4.436852e+01	4.324818e+01	-6.933817e+01	-4.280697e+01	-3.312404e+01	-7.656716e+01	-3.725082e+01	3.272343e+01	-2.224971e+01	-3.424419e+01	5.858122e+01	2.110562e+01
8.200000e+01	1.169801e+03	-3.302340e+01	-1.075753e+02	-9.956528e+01	-4.819637e+01	3.963515e+01	1.967296e+01	-8.670199e+01	-5.059998e+01	-5.697520e+01	-8.501098e+01	-7.869234e+01	-1.455462e+01	-5.641431e+01	-7.693720e+01	2.874087e+01	-2.310108e+01
8.300000e+01	1.235616e+03	-8.582512e+01	-1.358476e+02	-1.483055e+02	-1.145115e+02	3.434789e+01	-2.250581e+00	-1.018285e+02	-5.804422e+01	-7.780318e+01	-9.000969e+01	-1.142869e+02	-5.829615e+01	-8.516153e+01	-1.144015e+02	-1.101225e-01	-6.182895e+01
8.400000e+01	1.280021e+03	-1.221683e+02	-1.563104e+02	-1.828017e+02	-1.646509e+02	3.021498e+01	-1.918344e+01	-1.124608e+02	-6.367457e+01	-9.263559e+01	-9.012381e+01	-1.389526e+02	-9.267818e+01	-1.048843e+02	-1.420339e+02	-2.261717e+01	-8.801023e+01
8.500000e+01	1.300868e+03	-1.334553e+02	-1.649583e+02	-1.969233e+02	-1.902501e+02	2.942316e+01	-2.793971e+01	-1.167412e+02	-6.609393e+01	-9.886405e+01	-8.413389e+01	-1.487067e+02	-1.127896e+02	-1.128484e+02	-1.562268e+02	-3.402360e+01	-9.599808e+01
8.600000e+01	1.300095e+03	-1.143228e+02	-1.592008e+02	-1.870075e+02	-1.865214e+02	3.403939e+01	-2.616317e+01	-1.136330e+02	-6.430222e+01	-9.489833e+01	-7.141935e+01	-1.414401e+02	-1.155884e+02	-1.076733e+02	-1.551008e+02	-3.142091e+01	-8.311256e+01
8.700000e+01	1.282860e+03	-6.431170e+01	-1.386343e+02	-1.528519e+02	-1.535447e+02	4.531709e+01	-1.291156e+01	-1.031748e+02	-5.793384e+01	-8.070018e+01	-5.230532e+01	-1.173928e+02	-1.005468e+02	-8.965271e+01	-1.389288e+02	-1.461626e+01	-5.052537e+01
8.800000e+01	1.255651e+03	1.153150e+01	-1.053555e+02	-9.810189e+01	-9.645404e+01	6.313212e+01	1.100323e+01	-8.648617e+01	-4.733515e+01	-5.802015e+01	-2.826277e+01	-7.923299e+01	-6.983935e+01	-6.085861e+01	-1.101491e+02	1.369469e+01	-3.162893e+00
8.900000e+01	1.224104e+03	1.033565e+02	-6.371588e+01	-2.990619e+01	-2.443917e+01	8.576818e+01	4.301828e+01	-6.553582e+01	-3.348186e+01	-3.023398e+01	-1.866443e+00	-3.172649e+01	-2.804002e+01	-2.498985e+01	-7.298396e+01	4.854454e+01	5.137354e+01
9.000000e+01	1.191386e+03	1.983643e+02	-1.958214e+01	4.212824e+01	5.114769e+01	1.101763e+02	7.918668e+01	-4.276785e+01	-1.779248e+01	-1.789755e+00	2.352897e+01	1.894220e+01	1.859895e+01	1.305084e+01	-3.277951e+01	8.392711e+01	1.045434e+02
9.100000e+01	1.157793e+03	2.833394e+02	2.070851e+01	1.075094e+02	1.190504e+02	1.326752e+02	1.148490e+02	-2.070796e+01	-1.906764e+00	2.261505e+01	4.435754e+01	6.609260e+01	6.315144e+01	4.783275e+01	4.788756e+00	1.142617e+02	1.487316e+02
9.200000e+01	1.121632e+03	3.472290e+02	5.147411e+01	1.566971e+02	1.701654e+02	1.498949e+02	1.454821e+02	-1.632858e+00	1.253039e+01	3.894338e+01	5.754507e+01	1.035899e+02	9.915159e+01	7.425920e+01	3.453042e+01	1.356352e+02	1.787196e+02
9.300000e+01	1.080918e+03	3.831675e+02	6.869292e+01	1.828760e+02	1.989684e+02	1.596658e+02	1.675503e+02	1.267755e+01	2.407482e+01	4.461768e+01	6.118163e+01	1.268604e+02	1.216939e+02	8.848328e+01	5.250208e+01	1.464667e+02	1.924239e+02
9.400000e+01	1.035041e+03	3.895104e+02	7.071457e+01	1.832949e+02	2.041014e+02	1.615506e+02	1.791603e+02	2.112394e+01	3.168210e+01	3.903203e+01	5.497977e+01	1.337041e+02	1.283147e+02	8.867899e+01	5.664161e+01	1.474603e+02	1.908336e+02
9.500000e+01	9.856593e+02	3.696942e+02	5.852875e+01	1.598203e+02	1.881174e+02	1.568388e+02	1.803450e+02	2.341643e+01	3.487743e+01	2.365091e+01	4.036384e+01	1.247077e+02	1.194560e+02	7.544456e+01	4.715701e+01	1.409610e+02	1.773164e+02
9.600000e+01	9.364758e+02	3.310208e+02	3.549539e+01	1.184803e+02	1.565431e+02	1.480082e+02	1.728850e+02	2.012264e+01	3.384506e+01	1.649984e+00	2.012709e+01	1.031073e+02	9.835275e+01	5.167478e+01	2.652671e+01	1.300171e+02	1.565998e+02
9.700000e+01	8.921244e+02	2.827529e+02	6.561007e+00	6.804421e+01	1.165366e+02	1.378636e+02	1.597152e+02	1.259220e+01	2.938840e+01	-2.282764e+01	-2.266466e+00	7.407510e+01	7.031022e+01	2.188928e+01	-9.761279e-01	1.175135e+02	1.337486e+02
9.800000e+01	8.567848e+02	2.340883e+02	-2.284804e+01	1.800068e+01	7.548180e+01	1.286801e+02	1.441060e+02	2.740383e+00	2.275614e+01	-4.560434e+01	-2.351991e+01	4.358878e+01	4.152017e+01	-8.807949e+00	-3.017844e+01	1.056610e+02	1.133791e+02
9.900000e+01	8.331884e+02	1.925826e+02	-4.793869e+01	-2.347918e+01	3.983875e+01	1.216690e+02	1.288940e+02	-7.275657e+00	1.538662e+01	-6.332538e+01	-4.120138e+01	1.718348e+01	1.772180e+01	-3.582976e+01	-5.610041e+01	9.593993e+01	9.921294e+01
1.000000e+02	8.223944e+02	1.633592e+02	-6.536039e+01	-5.101995e+01	1.444213e+01	1.169307e+02	1.160031e+02	-1.541752e+01	8.650057e+00	-7.401044e+01	-5.408327e+01	-1.077523e+00	3.062931e+00	-5.595270e+01	-7.493795e+01	8.938086e+01	9.392192e+01
1.010000e+02	8.242640e+02	1.490837e+02	-7.355026e+01	-6.263502e+01	2.248057e+00	1.138402e+02	1.063687e+02	-2.009333e+01	3.648688e+00	-7.719890e+01	-6.206887e+01	-9.178591e+00	-5.665397e-01	-6.771615e+01	-8.467027e+01	8.691915e+01	9.911554e+01
1.020000e+02	8.382075e+02	1.503713e+02	-7.266067e+01	-5.946063e+01	4.364525e+00	1.116324e+02	1.001995e+02	-2.041232e+01	1.086664e+00	-7.374727e+01	-6.583388e+01	-7.212837e+00	6.372844e+00	-7.136018e+01	-8.518006e+01	8.954544e+01	1.153034e+02
1.030000e+02	8.637022e+02	1.662128e+02	-6.424900e+01	-4.492436e+01	2.015971e+01	1.098987e+02	9.738946e+01	-1.635027e+01	1.188166e+00	-6.543709e+01	-6.640480e+01	2.973740e+00	2.148001e+01	-6.843149e+01	-7.794610e+01	9.810673e+01	1.417501e+02
1.040000e+02	9.002983e+02	1.941818e+02	-5.090026e+01	-2.371163e+01	4.734188e+01	1.087942e+02	9.786619e+01	-8.807628e+00	3.648804e+00	-5.454899e+01	-6.485876e+01	1.838032e+01	4.114668e+01	-6.123569e+01	-6.547680e+01	1.128197e+02	1.762780e+02
1.050000e+02	9.471864e+02	2.304792e+02	-3.584113e+01	-7.919304e-01	8.206921e+01	1.089229e+02	1.017397e+02	4.777568e-01	7.642335e+00	-4.348339e+01	-6.220223e+01	3.552622e+01	6.140981e+01	-5.227956e+01	-5.066624e+01	1.327365e+02	2.151913e+02
1.060000e+02	1.002677e+03	2.700850e+02	-2.250148e+01	1.938411e+01	1.192566e+02	1.110089e+02	1.092372e+02	9.204180e+00	1.193226e+01	-3.443364e+01	-5.936482e+01	5.108899e+01	7.874841e+01	-4.378377e+01	-3.620505e+01	1.554627e+02	2.535130e+02
1.070000e+02	1.063978e+03	3.072700e+02	-1.397890e+01	3.349016e+01	1.532168e+02	1.155280e+02	1.205067e+02	1.496719e+01	1.512121e+01	-2.909999e+01	-5.720488e+01	6.243546e+01	9.069449e+01	-3.730822e+01	-2.412092e+01	1.773388e+02	2.856319e+02
1.080000e+02	1.127444e+03	3.365006e+02	-1.245978e+01	3.969943e+01	1.786178e+02	1.224286e+02	1.354039e+02	1.583329e+01	1.600950e+01	-2.846915e+01	-5.647110e+01	6.799172e+01	9.616995e+01	-3.352882e+01	-1.549341e+01	1.941123e+02	3.062857e+02
1.090000e+02	1.189165e+03	3.535020e+02	-1.875780e+01	3.777017e+01	1.915520e+02	1.310007e+02	1.533461e+02	1.087815e+01	1.396355e+01	-3.272118e+01	-5.773946e+01	6.740539e+01	9.550905e+01	-3.220635e+01	-1.037533e+01	2.019282e+02	3.116420e+02
1.100000e+02	1.245560e+03	3.561055e+02	-3.214992e+01	2.881223e+01	1.904045e+02	1.398842e+02	1.732652e+02	5.172628e-01	9.161680e+00	-4.131141e+01	-6.137978e+01	6.147876e+01	9.019144e+01	-3.236203e+01	-7.929940e+00	1.983352e+02	3.001700e+02
1.110000e+02	1.293663e+03	3.445693e+02	-5.059214e+01	1.480720e+01	1.762413e+02	1.471943e+02	1.936535e+02	-1.349829e+01	2.614327e+00	-5.320627e+01	-6.757847e+01	5.190052e+01	8.238513e+01	-3.261736e+01	-6.746517e+00	1.829884e+02	2.730385e+02
1.120000e+02	1.331055e+03	3.212851e+02	-7.124360e+01	-1.942506e+00	1.525779e+02	1.507565e+02	2.126865e+02	-2.844827e+01	-4.066404e+00	-6.717700e+01	-7.638619e+01	4.085242e+01	7.444321e+01	-3.160103e+01	-5.246502e+00	1.578248e+02	2.339219e+02
1.130000e+02	1.355644e+03	2.900214e+02	-9.111301e+01	-1.924349e+01	1.245809e+02	1.484569e+02	2.284121e+02	-4.128603e+01	-9.082098e+00	-8.203071e+01	-8.772673e+01	3.058323e+01	6.848285e+01	-2.831273e+01	-2.074993e+00	1.266561e+02	1.882739e+02
1.140000e+02	1.365646e+03	2.550008e+02	-1.076245e+02	-3.522291e+01	9.790405e+01	1.386879e+02	2.389916e+02	-4.938345e+01	-1.091978e+01	-9.670453e+01	-1.013242e+02	2.301802e+01	6.610097e+01	-2.237033e+01	3.599718e+00	9.430447e+01	1.422765e+02
1.150000e+02	1.359974e+03	2.201088e+02	-1.189687e+02	-4.836681e+01	7.745172e+01	1.208183e+02	2.429566e+02	-5.116898e+01	-8.735656e+00	-1.102329e+02	-1.165677e+02	1.943291e+01	6.820068e+01	-1.412139e+01	1.190594e+01	6.554581e+01	1.017353e+02
1.160000e+02	1.338937e+03	1.884206e+02	-1.242033e+02	-5.751751e+01	6.636898e+01	9.555676e+01	2.394261e+02	-4.647564e+01	-2.538593e+00	-1.216645e+02	-1.323914e+02	2.021020e+01	7.487378e+01	-4.629782e+00	2.220527e+01	4.416368e+01	7.117243e+01
1.170000e+02	1.304867e+03	1.620838e+02	-1.231460e+02	-6.193693e+01	6.550526e+01	6.505925e+01	2.282300e+02	-3.649862e+01	6.872516e+00	-1.300183e+02	-1.472641e+02	2.471048e+01	8.532713e+01	4.460695e+00	3.315289e+01	3.235231e+01	5.327433e+01
1.180000e+02	1.262243e+03	1.424607e+02	-1.161461e+02	-6.143476e+01	7.347487e+01	3.268249e+01	2.099208e+02	-2.338310e+01	1.818152e+01	-1.343273e+02	-1.593461e+02	3.132825e+01	9.791141e+01	1.120251e+01	4.291129e+01	3.056351e+01	4.873574e+01
1.190000e+02	1.217076e+03	1.303723e+02	-1.038376e+02	-5.646234e+01	8.727082e+01	2.403491e+00	1.857085e+02	-9.586525e+00	2.992992e+01	-1.337671e+02	-1.667995e+02	3.778865e+01	1.103373e+02	1.376112e+01	4.953822e+01	3.773255e+01	5.643621e+01
1.200000e+02	1.175717e+03	1.262874e+02	-8.697215e+01	-4.806078e+01	1.032157e+02	-2.193783e+01	1.573880e+02	2.760371e+00	4.085071e+01	-1.278224e+02	-1.681664e+02	4.167161e+01	1.201058e+02	1.090687e+01	5.150363e+01	5.171207e+01	7.382786e+01
1.210000e+02	1.143519e+03	1.303665e+02	-6.639897e+01	-3.763278e+01	1.179259e+02	-3.732792e+01	1.273077e+02	1.227447e+01	5.004150e+01	-1.164400e+02	-1.626955e+02	4.104045e+01	1.250629e+02	2.436198e+00	4.819582e+01	6.973005e+01	9.740767e+01
1.220000e+02	1.123909e+03	1.423633e+02	-4.318725e+01	-2.661817e+01	1.289770e+02	-4.197868e+01	9.836645e+01	1.840248e+01	5.693830e+01	-1.001250e+02	-1.505128e+02	3.497127e+01	1.238948e+02	-1.065504e+01	4.022025e+01	8.875671e+01	1.231841e+02
1.230000e+02	1.118185e+03	1.614572e+02	-1.880416e+01	-1.621705e+01	1.350974e+02	-3.535162e+01	7.394010e+01	2.119936e+01	6.115775e+01	-7.996139e+01	-1.325904e+02	2.378612e+01	1.163735e+02	-2.636113e+01	2.933046e+01	1.057669e+02	1.470945e+02
1.240000e+02	1.126019e+03	1.861113e+02	4.795120e+00	-7.280405e+00	1.359169e+02	-1.790666e+01	5.761136e+01	2.097453e+01	6.235065e+01	-5.755504e+01	-1.105446e+02	8.898595e+00	1.032643e+02	-4.219462e+01	1.796310e+01	1.179537e+02	1.653639e+02
1.250000e+02	1.146315e+03	2.140240e+02	2.528702e+01	-3.968181e-01	1.314720e+02	9.198000e+00	5.263264e+01	1.802195e+01	6.020308e+01	-3.491563e+01	-8.635071e+01	-7.662326e+00	8.595386e+01	-5.588024e+01	8.519149e+00	1.229527e+02	1.748015e+02
1.260000e+02	1.177919e+03	2.421954e+02	4.032839e+01	3.901748e+00	1.217414e+02	4.424416e+01	6.119515e+01	1.257280e+01	5.462542e+01	-1.429669e+01	-6.207225e+01	-2.385428e+01	6.597390e+01	-6.596342e+01	2.654474e+00	1.190867e+02	1.730330e+02
1.270000e+02	1.219866e+03	2.671222e+02	4.802333e+01	4.956803e+00	1.064351e+02	8.487569e+01	8.373529e+01	4.954044e+00	4.603138e+01	1.992163e+00	-3.966669e+01	-3.811289e+01	4.462332e+01	-7.211426e+01	8.519951e-01	1.055828e+02	1.586688e+02
1.280000e+02	1.271085e+03	2.851457e+02	4.731748e+01	1.962379e+00	8.513289e+01	1.279550e+02	1.185843e+02	-4.205318e+00	3.551267e+01	1.180491e+01	-2.086195e+01	-4.956078e+01	2.282408e+01	-7.503155e+01	2.434458e+00	8.269803e+01	1.314299e+02
1.290000e+02	1.329866e+03	2.929900e+02	3.815645e+01	-5.822712e+00	5.771409e+01	1.696247e+02	1.621876e+02	-1.391745e+01	2.472806e+01	1.342836e+01	-7.045002e+00	-5.789692e+01	1.221971e+00	-7.600674e+01	5.991632e+00	5.172199e+01	9.226364e+01
1.300000e+02	1.393475e+03	2.884686e+02	2.136531e+01	-1.866961e+01	2.489707e+01	2.057855e+02	2.098966e+02	-2.303557e+01	1.545559e+01	5.909586e+00	9.043798e-01	-6.307075e+01	-1.957438e+01	-7.632990e+01	1.002102e+01	1.487554e+01	4.345883e+01
1.310000e+02	1.458226e+03	2.712086e+02	-1.655227e+00	-3.593644e+01	-1.135950e+01	2.329852e+02	2.570730e+02	-3.065417e+01	8.937363e+00	-1.059282e+01	2.849730e+00	-6.493562e+01	-3.878661e+01	-7.676800e+01	1.349541e+01	-2.485547e+01	-1.129497e+01
1.320000e+02	1.520045e+03	2.431032e+02	-2.925200e+01	-5.581204e+01	-4.783192e+01	2.494425e+02	3.000868e+02	-3.651776e+01	5.278416e+00	-3.453070e+01	-3.666404e-01	-6.307802e+01	-5.544588e+01	-7.731238e+01	1.611395e+01	-6.394646e+01	-6.703751e+01
1.330000e+02	1.575276e+03	2.081759e+02	-5.973588e+01	-7.544788e+01	-8.052361e+01	2.557879e+02	3.368391e+02	-4.122138e+01	3.167695e+00	-6.290388e+01	-6.824408e+00	-5.693360e+01	-6.862396e+01	-7.729026e+01	1.814755e+01	-9.867177e+01	-1.180153e+02
1.340000e+02	1.621377e+03	1.717030e+02	-9.147343e+01	-9.154799e+01	-1.056342e+02	2.551581e+02	3.666815e+02	-4.608587e+01	6.511562e-02	-9.153884e+01	-1.369155e+01	-4.616067e+01	-7.785692e+01	-7.579792e+01	1.998471e+01	-1.256196e+02	-1.585849e+02
1.350000e+02	1.657242e+03	1.387597e+02	-1.229291e+02	-1.012835e+02	-1.207473e+02	2.525373e+02	3.899015e+02	-5.275127e+01	-7.190419e+00	-1.157390e+02	-1.769514e+01	-3.110592e+01	-8.358882e+01	-7.228090e+01	2.162536e+01	-1.423733e+02	-1.844321e+02
1.360000e+02	1.683119e+03	1.126873e+02	-1.527455e+02	-1.032135e+02	-1.258089e+02	2.535456e+02	4.071274e+02	-6.265963e+01	-2.155411e+01	-1.311916e+02	-1.580277e+01	-1.312794e+01	-8.741115e+01	-6.701219e+01	2.239019e+01	-1.481998e+02	-1.937694e+02
1.370000e+02	1.700242e+03	9.411469e+01	-1.798749e+02	-9.782837e+01	-1.234512e+02	2.630731e+02	4.189644e+02	-7.662635e+01	-4.498570e+01	-1.348894e+02	-5.918501e+00	5.419893e+00	-9.191021e+01	-6.123937e+01	2.100181e+01	-1.444538e+02	-1.880454e+02
1.380000e+02	1.710347e+03	8.099866e+01	-2.036810e+02	-8.744279e+01	-1.183989e+02	2.841625e+02	4.259578e+02	-9.462581e+01	-7.789744e+01	-1.257837e+02	1.261639e+01	2.161211e+01	-1.000594e+02	-5.689241e+01	1.601140e+01	-1.344110e+02	-1.717663e+02
1.390000e+02	1.715156e+03	6.971917e+01	-2.238906e+02	-7.542033e+01	-1.160400e+02	3.173751e+02	4.287229e+02	-1.158003e+02	-1.189269e+02	-1.049639e+02	3.885054e+01	3.266978e+01	-1.142710e+02	-5.592410e+01	6.383772e+00	-1.224246e+02	-1.513264e+02
1.400000e+02	1.715827e+03	5.678830e+01	-2.403428e+02	-6.499724e+01	-1.206084e+02	3.606709e+02	4.279796e+02	-1.386149e+02	-1.650262e+02	-7.531690e+01	7.039102e+01	3.673067e+01	-1.353883e+02	-5.951930e+01	-8.008371e+00	-1.126009e+02	-1.331487e+02
1.410000e+02	1.712411e+03	4.044702e+01	-2.526175e+02	-5.815359e+01	-1.336255e+02	4.097070e+02	4.243293e+02	-1.610690e+02	-2.118224e+02	-4.079562e+01	1.038329e+02	3.339524e+01	-1.619864e+02	-6.748333e+01	-2.617339e+01	-1.074530e+02	-1.217563e+02
1.420000e+02	1.703465e+03	2.148532e+01	-2.597473e+02	-5.496527e+01	-1.531884e+02	4.584474e+02	4.178495e+02	-1.809231e+02	-2.542148e+02	-5.533223e+00	1.353332e+02	2.385949e+01	-1.902983e+02	-7.806502e+01	-4.613126e+01	-1.070580e+02	-1.184620e+02
1.430000e+02	1.686108e+03	2.988646e+00	-2.602293e+02	-5.366902e+01	-1.743665e+02	5.000285e+02	4.077807e+02	-1.959546e+02	-2.871724e+02	2.694221e+01	1.612249e+02	1.060655e+01	-2.148937e+02	-8.830858e+01	-6.530564e+01	-1.090618e+02	-1.211258e+02
1.440000e+02	1.656682e+03	-1.080577e+01	-2.524298e+02	-5.137898e+01	-1.905495e+02	5.278337e+02	3.926046e+02	-2.042632e+02	-3.066405e+02	5.420968e+01	1.785859e+02	-3.211259e+00	-2.299646e+02	-9.482671e+01	-8.101935e+01	-1.095312e+02	-1.250163e+02
1.450000e+02	1.611976e+03	-1.600545e+01	-2.352661e+02	-4.514190e+01	-1.952543e+02	5.366665e+02	3.706259e+02	-2.046034e+02	-3.103688e+02	7.510160e+01	1.856886e+02	-1.447791e+01	-2.308303e+02	-9.473021e+01	-9.093895e+01	-1.043165e+02	-1.244117e+02
1.460000e+02	1.550597e+03	-1.029747e+01	-2.088772e+02	-3.291432e+01	-1.837972e+02	5.238058e+02	3.408934e+02	-1.966553e+02	-2.984110e+02	8.953258e+01	1.822548e+02	-2.069113e+01	-2.151689e+02	-8.639862e+01	-9.337966e+01	-9.041871e+01	-1.143732e+02
1.470000e+02	1.473919e+03	6.497426e+00	-1.749626e+02	-1.412031e+01	-1.543678e+02	4.896770e+02	3.040884e+02	-1.811252e+02	-2.730924e+02	9.812863e+01	1.694589e+02	-2.028163e+01	-1.835790e+02	-6.984734e+01	-8.745982e+01	-6.690918e+01	-9.215539e+01
1.480000e+02	1.386196e+03	3.263789e+01	-1.366062e+02	1.034606e+01	-1.083111e+02	4.379335e+02	2.629781e+02	-1.596127e+02	-2.384168e+02	1.018095e+02	1.496732e+02	-1.265922e+01	-1.393270e+02	-4.660636e+01	-7.314584e+01	-3.516644e+01	-5.791866e+01
1.490000e+02	1.293744e+03	6.522988e+01	-9.763450e+01	3.857464e+01	-4.968408e+01	3.749011e+02	2.222023e+02	-1.342773e+02	-1.990983e+02	1.014628e+02	1.260128e+02	1.932876e+00	-8.743811e+01	-1.920547e+01	-5.123591e+01	1.550671e+00	-1.464611e+01
1.500000e+02	1.203541e+03	1.011877e+02	-6.176465e+01	6.829075e+01	1.568418e+01	3.085119e+02	1.874125e+02	-1.074243e+02	-1.595590e+02	9.779348e+01	1.017881e+02	2.263204e+01	-3.349735e+01	9.511246e+00	-2.330590e+01	3.898898e+01	3.263907e+01
1.510000e+02	1.121785e+03	1.380424e+02	-3.186691e+01	9.741969e+01	8.135473e+01	2.469666e+02	1.640091e+02	-8.115437e+01	-1.232161e+02	9.134855e+01	7.998234e+01	4.813304e+01	1.743731e+01	3.699197e+01	8.391008e+00	7.296271e+01	7.813792e+01
1.520000e+02	1.052910e+03	1.743716e+02	-9.585594e+00	1.243796e+02	1.414129e+02	1.973897e+02	1.558400e+02	-5.718134e+01	-9.223267e+01	8.264653e+01	6.283980e+01	7.678454e+01	6.153973e+01	6.133043e+01	4.109679e+01	1.003153e+02	1.167216e+02
1.530000e+02	9.992877e+02	2.097776e+02	4.611430e+00	1.480772e+02	1.913691e+02	1.647047e+02	1.642143e+02	-3.683322e+01	-6.768989e+01	7.230089e+01	5.160381e+01	1.066332e+02	9.647340e+01	8.132662e+01	7.181045e+01	1.195579e+02	1.452042e+02
1.540000e+02	9.615242e+02	2.444686e+02	1.105980e+01	1.677182e+02	2.286679e+02	1.509068e+02	1.874859e+02	-2.117214e+01	-4.998895e+01	6.104840e+01	4.640980e+01	1.354869e+02	1.213084e+02	9.634119e+01	9.762742e+01	1.310399e+02	1.630882e+02
1.550000e+02	9.390540e+02	2.786000e+02	1.041035e+01	1.825963e+02	2.527225e+02	1.548536e+02	2.213082e+02	-1.112524e+01	-3.924517e+01	4.965522e+01	4.632804e+01	1.610612e+02	1.362683e+02	1.060910e+02	1.161098e+02	1.366124e+02	1.725271e+02
1.560000e+02	9.306862e+02	3.115986e+02	3.240902e+00	1.919961e+02	2.645034e+02	1.726218e+02	2.594936e+02	-7.527326e+00	-3.550586e+01	3.874649e+01	4.955369e+01	1.812283e+02	1.424424e+02	1.105124e+02	1.256182e+02	1.388850e+02	1.774766e+02
1.570000e+02	9.348652e+02	3.417205e+02	-1.009068e+01	1.952603e+02	2.658496e+02	1.983711e+02	2.952631e+02	-1.102564e+01	-3.873877e+01	2.864784e+01	5.373593e+01	1.943257e+02	1.415243e+02	1.097445e+02	1.255397e+02	1.403098e+02	1.822837e+02
1.580000e+02	9.496065e+02	3.660473e+02	-2.932984e+01	1.919870e+02	2.587707e+02	2.255366e+02	3.225873e+02	-2.186735e+01	-4.864845e+01	1.931835e+01	5.641050e+01	1.994497e+02	1.355764e+02	1.042003e+02	1.163690e+02	1.424017e+02	1.901958e+02
1.590000e+02	9.722661e+02	3.810010e+02	-5.404082e+01	1.822667e+02	2.449956e+02	2.480812e+02	3.373102e+02	-3.965377e+01	-6.444424e+01	1.040315e+01	5.546040e+01	1.966539e+02	1.268062e+02	9.464737e+01	9.963218e+01	1.453636e+02	2.023205e+02
1.600000e+02	9.994213e+02	3.832662e+02	-8.332168e+01	1.668487e+02	2.258959e+02	2.615287e+02	3.378210e+02	-6.317803e+01	-8.469563e+01	1.373658e+00	4.950145e+01	1.869925e+02	1.173471e+02	8.221669e+01	7.766596e+01	1.482301e+02	2.173946e+02
1.610000e+02	1.027115e+03	3.708281e+02	-1.156813e+02	1.471467e+02	2.027139e+02	2.635739e+02	3.251553e+02	-9.044695e+01	-1.073734e+02	-8.308168e+00	3.809776e+01	1.723810e+02	1.090487e+02	6.829355e+01	5.327324e+01	1.494408e+02	2.324023e+02
1.620000e+02	1.051540e+03	3.437514e+02	-1.491590e+02	1.250443e+02	1.768755e+02	2.541949e+02	3.025371e+02	-1.189277e+02	-1.301053e+02	-1.905403e+01	2.176280e+01	1.552757e+02	1.032813e+02	5.430018e+01	2.928825e+01	1.475874e+02	2.437547e+02
1.630000e+02	1.070001e+03	3.044078e+02	-1.816497e+02	1.025410e+02	1.501380e+02	2.353358e+02	2.744961e+02	-1.459791e+02	-1.505950e+02	-3.105503e+01	1.773643e+00	1.382117e+02	1.007672e+02	4.142361e+01	8.105290e+00	1.420328e+02	2.485615e+02
1.640000e+02	1.081787e+03	2.570683e+02	-2.113027e+02	8.134500e+01	1.244366e+02	2.103256e+02	2.457918e+02	-1.693616e+02	-1.670937e+02	-4.420946e+01	-2.011703e+01	1.232862e+02	1.014619e+02	3.036703e+01	-8.743320e+00	1.331800e+02	2.455504e+02
1.650000e+02	1.088579e+03	2.070251e+02	-2.368438e+02	6.255490e+01	1.014656e+02	1.832252e+02	2.204244e+02	-1.876926e+02	-1.787879e+02	-5.805636e+01	-4.197540e+01	1.117062e+02	1.045302e+02	2.119524e+01	-2.085721e+01	1.223229e+02	2.353808e+02
1.660000e+02	1.094162e+03	1.595624e+02	-2.577217e+02	4.653559e+01	8.217287e+01	1.582537e+02	2.009879e+02	-2.007312e+02	-1.859884e+02	-7.173375e+01	-6.192861e+01	1.035263e+02	1.084643e+02	1.331306e+01	-2.899969e+01	1.111727e+02	2.203468e+02
1.670000e+02	1.103461e+03	1.190940e+02	-2.740677e+02	3.301422e+01	6.639747e+01	1.393512e+02	1.885065e+02	-2.094156e+02	-1.900530e+02	-8.401505e+01	-7.834992e+01	9.766657e+01	1.113643e+02	5.579911e+00	-3.485990e+01	1.012576e+02	2.036641e+02
1.680000e+02	1.121168e+03	8.866248e+01	-2.865123e+02	2.134760e+01	5.282911e+01	1.298447e+02	1.827318e+02	-2.156264e+02	-1.930426e+02	-9.346993e+01	-9.001194e+01	9.223378e+01	1.113599e+02	-3.456690e+00	-4.058300e+01	9.341244e+01	1.886189e+02
1.690000e+02	1.150371e+03	6.983329e+01	-2.959123e+02	1.088078e+01	3.936770e+01	1.321487e+02	1.827249e+02	-2.217012e+02	-1.971751e+02	-9.873743e+01	-9.621765e+01	8.509222e+01	1.070990e+02	-1.522809e+01	-4.816146e+01	8.752963e+01	1.778380e+02
1.700000e+02	1.191583e+03	6.290734e+01	-3.030251e+02	1.327408e+00	2.383135e+01	1.474651e+02	1.874776e+02	-2.297908e+02	-2.042013e+02	-9.882392e+01	-9.687901e+01	7.456193e+01	9.820713e+01	-3.073552e+01	-5.881174e+01	8.264371e+01	1.728456e+02
1.710000e+02	1.242508e+03	6.732603e+01	-3.081754e+02	-6.887387e+00	4.832310e+00	1.755328e+02	1.963604e+02	-2.412198e+02	-2.148723e+02	-9.330313e+01	-9.249228e+01	6.006839e+01	8.560572e+01	-5.012155e+01	-7.247587e+01	7.730895e+01	1.739601e+02
1.720000e+02	1.298644e+03	8.213021e+01	-3.110049e+02	-1.240740e+01	-1.746794e+01	2.145439e+02	2.092843e+02	-2.560563e+02	-2.286699e+02	-8.233497e+01	-8.398580e+01	4.254128e+01	7.157933e+01	-7.234003e+01	-8.759485e+01	7.012782e+01	1.804786e+02
1.730000e+02	1.354604e+03	1.063339e+02	-3.104251e+02	-1.297678e+01	-4.104643e+01	2.613455e+02	2.265758e+02	-2.730648e+02	-2.439114e+02	-6.651371e+01	-7.247586e+01	2.438347e+01	5.950003e+01	-9.509120e+01	-1.012837e+02	6.023828e+01	1.910330e+02
1.740000e+02	1.405735e+03	1.390939e+02	-3.048567e+02	-5.843609e+00	-6.237157e+01	3.119549e+02	2.486348e+02	-2.900827e+02	-2.582141e+02	-4.664259e+01	-5.901183e+01	8.930217e+00	5.316913e+01	-1.151628e+02	-1.099630e+02	4.759253e+01	2.039771e+02
1.750000e+02	1.449477e+03	1.796231e+02	-2.927103e+02	1.145436e+01	-7.740123e+01	3.622778e+02	2.754796e+02	-3.046747e+02	-2.691541e+02	-2.355615e+01	-4.438982e+01	-5.103079e-01	5.584500e+01	-1.291848e+02	-1.103545e+02	3.295440e+01	2.176928e+02
1.760000e+02	1.485880e+03	2.269025e+02	-2.729184e+02	4.010399e+01	-8.290840e+01	4.088088e+02	3.063013e+02	-3.147757e+02	-2.748558e+02	1.937400e+00	-2.906886e+01	-1.753711e+00	6.917353e+01	-1.346052e+02	-1.005703e+02	1.766301e+01	2.307581e+02
1.770000e+02	1.517048e+03	2.793490e+02	-2.452753e+02	7.918427e+01	-7.761804e+01	4.490809e+02	3.391693e+02	-3.190354e+02	-2.742760e+02	2.900060e+01	-1.317691e+01	5.423743e+00	9.236171e+01	-1.305339e+02	-8.091116e+01	3.294167e+00	2.419814e+02
1.780000e+02	1.545726e+03	3.346263e+02	-2.104349e+02	1.253689e+02	-6.267427e+01	4.817307e+02	3.710383e+02	-3.167416e+02	-2.670987e+02	5.666375e+01	3.420655e+00	1.906166e+01	1.219486e+02	-1.180936e+02	-5.402877e+01	-8.644497e+00	2.503509e+02
1.790000e+02	1.573678e+03	3.897308e+02	-1.696138e+02	1.733815e+02	-4.123775e+01	5.062282e+02	3.981543e+02	-3.074524e+02	-2.533650e+02	8.375112e+01	2.100148e+01	3.554237e+01	1.523802e+02	-1.000949e+02	-2.432272e+01	-1.691405e+01	2.549699e+02
1.800000e+02	1.600705e+03	4.413681e+02	-1.242141e+02	2.171275e+02	-1.740322e+01	5.224744e+02	4.168375e+02	-2.906426e+02	-2.331022e+02	1.088880e+02	3.981340e+01	5.069842e+01	1.773142e+02	-8.014608e+01	3.251134e+00	-2.065339e+01	2.550461e+02
1.810000e+02	1.624819e+03	4.865244e+02	-7.560085e+01	2.511433e+02	5.080727e+00	5.305242e+02	4.244546e+02	-2.656628e+02	-2.062050e+02	1.306040e+02	5.986155e+01	6.108083e+01	1.912817e+02	-6.155683e+01	2.453461e+01	-1.945293e+01	2.499785e+02
1.820000e+02	1.643545e+03	5.230809e+02	-2.513461e+01	2.718724e+02	2.376592e+01	5.305983e+02	4.202760e+02	-2.321019e+02	-1.726527e+02	1.475180e+02	8.070796e+01	6.490470e+01	1.911644e+02	-4.647386e+01	3.719584e+01	-1.342896e+01	2.395352e+02
1.830000e+02	1.655663e+03	5.503149e+02	2.564020e+01	2.783565e+02	3.782180e+01	5.233673e+02	4.059042e+02	-1.903699e+02	-1.329253e+02	1.585654e+02	1.013656e+02	6.234604e+01	1.769908e+02	-3.554441e+01	4.110257e+01	-3.279818e+00	2.240608e+02
1.840000e+02	1.662409e+03	5.691618e+02	7.486503e+01	2.721650e+02	4.773374e+01	5.103122e+02	3.850969e+02	-1.421428e+02	-8.834940e+01	1.632144e+02	1.203577e+02	5.515677e+01	1.518072e+02	-2.814392e+01	3.799927e+01	9.735393e+00	2.046074e+02
1.850000e+02	1.667368e+03	5.821446e+02	1.204701e+02	2.566749e+02	5.466169e+01	4.938992e+02	3.630078e+02	-9.036255e+01	-4.113831e+01	1.616085e+02	1.359605e+02	4.584204e+01	1.207144e+02	-2.296307e+01	3.071724e+01	2.394531e+01	1.828844e+02
1.860000e+02	1.674955e+03	5.929221e+02	1.605188e+02	2.360144e+02	5.981155e+01	4.773874e+02	3.450647e+02	-3.872407e+01	5.924551e+00	1.545944e+02	1.465784e+02	3.677133e+01	8.943604e+01	-1.865013e+01	2.227179e+01	3.754053e+01	1.609857e+02
1.870000e+02	1.688171e+03	6.054855e+02	1.936308e+02	2.140394e+02	6.406247e+01	4.642636e+02	3.357856e+02	9.130207e+00	5.000432e+01	1.436267e+02	1.511518e+02	2.953877e+01	6.288780e+01	-1.426655e+01	1.514865e+01	4.891446e+01	1.409571e+02
1.880000e+02	1.706731e+03	6.231476e+02	2.192603e+02	1.936316e+02	6.790404e+01	4.574812e+02	3.378235e+02	5.034195e+01	8.868237e+01	1.305782e+02	1.494827e+02	2.471337e+01	4.414928e+01	-9.464744e+00	1.092031e+01	5.698422e+01	1.243542e+02
1.890000e+02	1.726583e+03	6.475926e+02	2.376945e+02	1.764416e+02	7.158751e+01	4.587718e+02	3.514374e+02	8.319612e+01	1.201872e+02	1.175077e+02	1.423852e+02	2.194340e+01	3.405689e+01	-4.433756e+00	1.017299e+01	6.141482e+01	1.119749e+02
1.900000e+02	1.741158e+03	6.783077e+02	2.497999e+02	1.630412e+02	7.534452e+01	4.682663e+02	3.744854e+02	1.070413e+02	1.433736e+02	1.064267e+02	1.316090e+02	2.028280e+01	3.143287e+01	2.836095e-01	1.264542e+01	6.269920e+01	1.038816e+02
1.910000e+02	1.743833e+03	7.126393e+02	2.566719e+02	1.533336e+02	7.955907e+01	4.845349e+02	4.029367e+02	1.219393e+02	1.575869e+02	9.908550e+01	1.195349e+02	1.860122e+01	3.379931e+01	4.015186e+00	1.748680e+01	6.207215e+01	9.970054e+01
1.920000e+02	1.730541e+03	7.465015e+02	2.593556e+02	1.470211e+02	8.483401e+01	5.050039e+02	4.318062e+02	1.283093e+02	1.625780e+02	9.677818e+01	1.087009e+02	1.597487e+01	3.832082e+01	6.177536e+00	2.357986e+01	6.125382e+01	9.904556e+01
1.930000e+02	1.701346e+03	7.755119e+02	2.587144e+02	1.439438e+02	9.193171e+01	5.265999e+02	4.563215e+02	1.267527e+02	1.585459e+02	1.001690e+02	1.012618e+02	1.198206e+01	4.268248e+01	6.457203e+00	2.988998e+01	6.204121e+01	1.018454e+02
1.940000e+02	1.660365e+03	7.961518e+02	2.554109e+02	1.441760e+02	1.015892e+02	5.464314e+02	4.730472e+02	1.180730e+02	1.462488e+02	1.091627e+02	9.852601e+01	6.837794e+00	4.565029e+01	4.916251e+00	3.577783e+01	6.581065e+01	1.083950e+02
1.950000e+02	1.614151e+03	8.065593e+02	2.499160e+02	1.478777e+02	1.142379e+02	5.623446e+02	4.806656e+02	1.033619e+02	1.270504e+02	1.228663e+02	1.006959e+02	1.323046e+00	4.718191e+01	1.981472e+00	4.118666e+01	7.305039e+01	1.190916e+02
1.960000e+02	1.569329e+03	8.067276e+02	2.424927e+02	1.550158e+02	1.297086e+02	5.732385e+02	4.801795e+02	8.400065e+01	1.028036e+02	1.396897e+02	1.068900e+02	-3.476823e+00	4.812574e+01	-1.690042e+00	4.663009e+01	8.307762e+01	1.339817e+02
1.970000e+02	1.530502e+03	7.981303e+02	2.331689e+02	1.651256e+02	1.470445e+02	5.790816e+02	4.744585e+02	6.151407e+01	7.557083e+01	1.575987e+02	1.154290e+02	-6.529923e+00	4.969640e+01	-5.415528e+00	5.297506e+01	9.406848e+01	1.523451e+02
1.980000e+02	1.499209e+03	7.829893e+02	2.217570e+02	1.772553e+02	1.645388e+02	5.806348e+02	4.672670e+02	3.733796e+01	4.728460e+01	1.744730e+02	1.242814e+02	-7.164431e+00	5.297377e+01	-8.661797e+00	6.110482e+01	1.034330e+02	1.725274e+02
1.990000e+02	1.474218e+03	7.634910e+02	2.079563e+02	1.901299e+02	1.800383e+02	5.789688e+02	4.620996e+02	1.263307e+01	1.948471e+01	1.884721e+02	1.315145e+02	-5.194003e+00	5.861522e+01	-1.110048e+01	7.160270e+01	1.084347e+02	1.921069e+02
2.000000e+02	1.452898e+03	7.412277e+02	1.915245e+02	2.024484e+02	1.914422e+02	5.749424e+02	4.612349e+02	-1.174163e+01	-6.767527e+00	1.982924e+02	1.356086e+02	-8.182947e-01	6.683970e+01	-1.251987e+01	8.458496e+01	1.068565e+02	2.083294e+02
2.010000e+02	1.433087e+03	7.170371e+02	1.724591e+02	2.131708e+02	1.972414e+02	5.688433e+02	4.653425e+02	-3.507389e+01	-3.077610e+01	2.032354e+02	1.355545e+02	5.637455e+00	7.761634e+01	-1.265505e+01	9.973483e+01	9.750582e+01	2.186452e+02
2.020000e+02	1.414785e+03	6.912656e+02	1.511244e+02	2.216714e+02	1.969343e+02	5.603363e+02	4.737500e+02	-5.653890e+01	-5.195400e+01	2.030785e+02	1.307458e+02	1.400795e+01	9.092590e+01	-1.104711e+01	1.164927e+02	8.044102e+01	2.211799e+02
2.030000e+02	1.401147e+03	6.643239e+02	1.282944e+02	2.277208e+02	1.912156e+02	5.487246e+02	4.851834e+02	-7.497025e+01	-6.953237e+01	1.978267e+02	1.207589e+02	2.445642e+01	1.069624e+02	-7.027376e+00	1.342860e+02	5.692914e+01	2.150392e+02
2.040000e+02	1.398446e+03	6.372794e+02	1.051232e+02	2.313438e+02	1.819083e+02	5.333852e+02	4.985690e+02	-8.878577e+01	-8.236346e+01	1.874865e+02	1.051691e+02	3.743532e+01	1.261754e+02	1.422516e-01	1.526709e+02	2.923708e+01	2.004322e+02
2.050000e+02	1.414972e+03	6.121878e+02	8.308168e+01	2.326426e+02	1.716590e+02	5.141719e+02	5.134611e+02	-9.613336e+01	-8.893026e+01	1.720117e+02	8.354834e+01	5.342814e+01	1.490950e+02	1.101427e+01	1.713017e+02	3.571490e-01	1.786376e+02
2.060000e+02	1.459072e+03	5.919420e+02	6.388072e+01	2.316692e+02	1.634313e+02	4.916276e+02	5.298565e+02	-9.524567e+01	-8.762199e+01	1.515025e+02	5.572827e+01	7.254352e+01	1.759418e+02	2.567079e+01	1.897323e+02	-2.630092e+01	1.518386e+02
2.070000e+02	1.536727e+03	5.795920e+02	4.936551e+01	2.283881e+02	1.598484e+02	4.669668e+02	5.474950e+02	-8.492569e+01	-7.724403e+01	1.266093e+02	2.227932e+01	9.409763e+01	2.061096e+02	4.349731e+01	2.071384e+02	-4.728974e+01	1.228383e+02
2.080000e+02	1.649258e+03	5.773243e+02	4.132995e+01	2.227183e+02	1.624894e+02	4.418840e+02	5.650321e+02	-6.503893e+01	-5.762357e+01	9.895332e+01	-1.499429e+01	1.163501e+02	2.377135e+02	6.307901e+01	2.221023e+02	-5.961252e+01	9.468667e+01
2.090000e+02	1.791805e+03	5.854693e+02	4.121048e+01	2.146063e+02	1.713242e+02	4.182752e+02	5.795701e+02	-3.686235e+01	-3.009117e+01	7.130151e+01	-5.283494e+01	1.365340e+02	2.674420e+02	8.225091e+01	2.325972e+02	-6.127251e+01	7.029014e+01
2.100000e+02	1.953182e+03	6.019687e+02	4.968801e+01	2.040691e+02	1.845140e+02	3.979318e+02	5.868745e+02	-3.145987e+00	2.389865e+00	4.729809e+01	-8.683433e+01	1.512355e+02	2.909041e+02	9.830504e+01	2.362416e+02	-5.172704e+01	5.211169e+01
2.110000e+02	2.117452e+03	6.226217e+02	6.632414e+01	1.911794e+02	1.987432e+02	3.822482e+02	5.822926e+02	3.220350e+01	3.558124e+01	3.074294e+01	-1.123028e+02	1.570589e+02	3.034828e+02	1.083367e+02	2.307882e+02	-3.204431e+01	4.204418e+01
2.120000e+02	2.267080e+03	6.421521e+02	8.941611e+01	1.760210e+02	2.100796e+02	3.719965e+02	5.620715e+02	6.480017e+01	6.477681e+01	2.463945e+01	-1.254686e+02	1.514050e+02	3.014901e+02	1.096943e+02	2.147152e+02	-4.635013e+00	4.145633e+01
2.130000e+02	2.386886e+03	6.557952e+02	1.162130e+02	1.586961e+02	2.151282e+02	3.672421e+02	5.245972e+02	9.066269e+01	8.583545e+01	3.037786e+01	-1.245595e+02	1.331454e+02	2.832559e+02	1.004815e+02	1.877336e+02	2.739510e+01	5.130159e+01
2.140000e+02	2.467566e+03	6.608247e+02	1.434874e+02	1.394546e+02	2.120857e+02	3.674505e+02	4.711094e+02	1.070452e+02	9.610353e+01	4.738423e+01	-1.103154e+02	1.030119e+02	2.497701e+02	8.003583e+01	1.510437e+02	6.104239e+01	7.212449e+01
2.150000e+02	2.507451e+03	6.573827e+02	1.682745e+02	1.189353e+02	2.012893e+02	3.717497e+02	4.056392e+02	1.129434e+02	9.491200e+01	7.336298e+01	-8.570557e+01	6.360340e+01	2.046409e+02	4.928346e+01	1.072530e+02	9.403659e+01	1.038473e+02
2.160000e+02	2.511768e+03	6.482137e+02	1.884899e+02	9.839216e+01	1.850274e+02	3.792310e+02	3.341927e+02	1.091069e+02	8.348504e+01	1.050055e+02	-5.496934e+01	1.900827e+01	1.533615e+02	1.084890e+01	5.996756e+01	1.250601e+02	1.453648e+02
2.170000e+02	2.489728e+03	6.373590e+02	2.031854e+02	7.971879e+01	1.666613e+02	3.891504e+02	2.634358e+02	9.757269e+01	6.431590e+01	1.388702e+02	-2.237878e+01	-2.589481e+01	1.020976e+02	-3.118735e+01	1.315604e+01	1.535056e+02	1.941372e+02
2.180000e+02	2.450713e+03	6.283482e+02	2.123912e+02	6.514523e+01	1.493808e+02	4.009739e+02	1.992735e+02	8.090546e+01	4.025465e+01	1.721373e+02	8.814960e+00	-6.634124e+01	5.633042e+01	-7.191993e+01	-2.956288e+01	1.789441e+02	2.460579e+02
2.190000e+02	2.401305e+03	6.226759e+02	2.167008e+02	5.665140e+01	1.350601e+02	4.143291e+02	1.457205e+02	6.142554e+01	1.363781e+01	2.030638e+02	3.694385e+01	-9.862445e+01	1.970787e+01	-1.065533e+02	-6.554467e+01	2.006054e+02	2.958094e+02
2.200000e+02	2.344374e+03	6.192427e+02	2.168644e+02	5.532322e+01	1.236428e+02	4.289814e+02	1.043568e+02	4.068119e+01	-1.425227e+01	2.311174e+02	6.194492e+01	-1.208604e+02	-6.621185e+00	-1.314222e+02	-9.350702e+01	2.171507e+02	3.377380e+02
2.210000e+02	2.280392e+03	6.149986e+02	2.135948e+02	6.094713e+01	1.132796e+02	4.449000e+02	7.447521e+01	1.930742e+01	-4.324397e+01	2.568395e+02	8.499163e+01	-1.333404e+02	-2.404381e+01	-1.448054e+02	-1.135852e+02	2.268659e+02	3.670512e+02
2.220000e+02	2.209977e+03	6.064780e+02	2.076199e+02	7.203786e+01	1.011679e+02	4.623427e+02	5.381816e+01	-2.731451e+00	-7.386069e+01	2.814812e+02	1.079338e+02	-1.383134e+02	-3.589509e+01	-1.472720e+02	-1.270432e+02	2.282124e+02	3.809855e+02
2.230000e+02	2.136183e+03	5.915244e+02	1.998435e+02	8.627620e+01	8.479049e+01	4.817903e+02	3.962729e+01	-2.564139e+01	-1.065868e+02	3.064308e+02	1.326744e+02	-1.392085e+02	-4.639732e+01	-1.414427e+02	-1.357321e+02	2.205242e+02	3.795675e+02
2.240000e+02	2.065333e+03	5.704503e+02	1.914178e+02	1.011355e+02	6.311728e+01	5.035936e+02	2.964393e+01	-4.923538e+01	-1.410598e+02	3.324780e+02	1.605328e+02	-1.395174e+02	-5.939648e+01	-1.312387e+02	-1.414714e+02	2.045905e+02	3.657068e+02
2.250000e+02	2.006060e+03	5.461723e+02	1.836177e+02	1.144193e+02	3.734547e+01	5.273745e+02	2.274246e+01	-7.251077e+01	-1.754625e+02	3.590804e+02	1.916483e+02	-1.417088e+02	-7.722833e+01	-1.208490e+02	-1.455512e+02	1.828988e+02	3.445570e+02
2.260000e+02	1.967076e+03	5.233355e+02	1.775704e+02	1.245434e+02	1.090875e+01	5.514424e+02	1.902595e+01	-9.352117e+01	-2.063449e+02	3.839153e+02	2.245719e+02	-1.465479e+02	-1.000280e+02	-1.137164e+02	-1.485005e+02	1.594116e+02	3.222964e+02
2.270000e+02	1.954693e+03	5.068617e+02	1.740333e+02	1.305805e+02	-1.127449e+01	5.726001e+02	1.940973e+01	-1.095973e+02	-2.289960e+02	4.030292e+02	2.562754e+02	-1.530499e+02	-1.256946e+02	-1.118053e+02	-1.501604e+02	1.388884e+02	3.046392e+02
2.280000e+02	1.971050e+03	5.005338e+02	1.734202e+02	1.322107e+02	-2.408861e+01	5.866123e+02	2.488514e+01	-1.178466e+02	-2.383096e+02	4.117296e+02	2.827605e+02	-1.590560e+02	-1.505498e+02	-1.153082e+02	-1.499967e+02	1.259107e+02	2.954637e+02
2.290000e+02	2.013617e+03	5.061209e+02	1.761440e+02	1.297038e+02	-2.363383e+01	5.893168e+02	3.573982e+01	-1.157553e+02	-2.299160e+02	4.060595e+02	3.002350e+02	-1.621955e+02	-1.705314e+02	-1.228251e+02	-1.475166e+02	1.238854e+02	2.959133e+02
2.300000e+02	2.076032e+03	5.232370e+02	1.831274e+02	1.239351e+02	-8.309678e+00	5.780148e+02	5.099748e+01	-1.016928e+02	-2.012464e+02	3.843731e+02	3.065168e+02	-1.608851e+02	-1.825820e+02	-1.319270e+02	-1.426432e+02	1.343360e+02	3.042006e+02
2.310000e+02	2.149885e+03	5.497930e+02	1.961673e+02	1.163189e+02	2.076511e+01	5.525723e+02	6.825130e+01	-7.518184e+01	-1.522219e+02	3.483884e+02	3.021203e+02	-1.550304e+02	-1.858018e+02	-1.399362e+02	-1.359316e+02	1.566990e+02	3.161570e+02
2.320000e+02	2.226764e+03	5.827019e+02	2.178325e+02	1.085417e+02	6.007805e+01	5.157369e+02	8.393994e+01	-3.693936e+01	-8.540190e+01	3.032335e+02	2.905107e+02	-1.462303e+02	-1.819694e+02	-1.447046e+02	-1.285627e+02	1.886427e+02	3.263676e+02
2.330000e+02	2.299826e+03	6.184979e+02	2.507695e+02	1.021043e+02	1.045965e+02	4.724976e+02	9.398876e+01	1.120245e+01	-5.618089e+00	2.563865e+02	2.773242e+02	-1.374630e+02	-1.752204e+02	-1.451876e+02	-1.221216e+02	2.267196e+02	3.295649e+02
2.340000e+02	2.364380e+03	6.536975e+02	2.966010e+02	9.783968e+01	1.488138e+02	4.287338e+02	9.464286e+01	6.637141e+01	8.074347e+01	2.158564e+02	2.687939e+02	-1.323903e+02	-1.709548e+02	-1.416802e+02	-1.182341e+02	2.670489e+02	3.218949e+02
2.350000e+02	2.417448e+03	6.849389e+02	3.548600e+02	9.565601e+01	1.876031e+02	3.897036e+02	8.327445e+01	1.247019e+02	1.666142e+02	1.882446e+02	2.699790e+02	-1.345026e+02	-1.743236e+02	-1.356907e+02	-1.181844e+02	3.057880e+02	3.017257e+02
2.360000e+02	2.456816e+03	7.090806e+02	4.224608e+02	9.468072e+01	2.167100e+02	3.589411e+02	5.896686e+01	1.814600e+02	2.451227e+02	1.773369e+02	2.834659e+02	-1.463207e+02	-1.887858e+02	-1.295274e+02	-1.226375e+02	3.393476e+02	2.698406e+02
2.370000e+02	2.480399e+03	7.234547e+02	4.940118e+02	9.380139e+01	2.329677e+02	3.378933e+02	2.275601e+01	2.314133e+02	3.104070e+02	1.836036e+02	3.089720e+02	-1.687978e+02	-2.151713e+02	-1.257228e+02	-1.315341e+02	3.645017e+02	2.290714e+02
2.380000e+02	2.486563e+03	7.263577e+02	5.629177e+02	9.240779e+01	2.344841e+02	3.262499e+02	-2.248281e+01	2.695363e+02	3.583225e+02	2.045941e+02	3.438515e+02	-2.009744e+02	-2.514443e+02	-1.264135e+02	-1.441393e+02	3.786230e+02	1.835971e+02
2.390000e+02	2.475434e+03	7.177041e+02	6.228870e+02	9.103858e+01	2.209974e+02	3.226332e+02	-7.242276e+01	2.919661e+02	3.869942e+02	2.358918e+02	3.841281e+02	-2.398831e+02	-2.930902e+02	-1.327692e+02	-1.591650e+02	3.801618e+02	1.381966e+02
2.400000e+02	2.450497e+03	6.996290e+02	6.693206e+02	9.166414e+01	1.943727e+02	3.252489e+02	-1.218292e+02	2.969438e+02	3.971351e+02	2.721848e+02	4.255405e+02	-2.807134e+02	-3.338769e+02	-1.445622e+02	-1.748942e+02	3.692662e+02	9.767087e+01
2.410000e+02	2.419408e+03	6.767673e+02	7.001635e+02	9.746570e+01	1.589478e+02	3.322688e+02	-1.651642e+02	2.854139e+02	3.920302e+02	3.081329e+02	4.642314e+02	-3.172846e+02	-3.667662e+02	-1.600020e+02	-1.893011e+02	3.482480e+02	6.650064e+01
2.420000e+02	2.393161e+03	6.559766e+02	7.160659e+02	1.121406e+02	1.213324e+02	3.419732e+02	-1.972185e+02	2.610314e+02	3.771081e+02	3.389578e+02	4.970282e+02	-3.428945e+02	-3.848879e+02	-1.759628e+02	-2.002349e+02	3.215663e+02	4.865356e+01
2.430000e+02	2.383526e+03	6.453816e+02	7.199599e+02	1.389146e+02	8.941790e+01	3.528471e+02	-2.137818e+02	2.295144e+02	3.590728e+02	3.608873e+02	5.215242e+02	-3.515314e+02	-3.826097e+02	-1.886635e+02	-2.057425e+02	2.951591e+02	4.737658e+01
2.440000e+02	2.399484e+03	6.527914e+02	7.162835e+02	1.795345e+02	7.070307e+01	3.637869e+02	-2.123507e+02	1.974799e+02	3.446675e+02	3.716165e+02	5.362279e+02	-3.392694e+02	-3.566932e+02	-1.946882e+02	-2.045219e+02	2.752234e+02	6.484005e+01
2.450000e+02	2.443996e+03	6.837458e+02	7.100610e+02	2.335261e+02	7.040200e+01	3.743778e+02	-1.927896e+02	1.710501e+02	3.392701e+02	3.707917e+02	5.408739e+02	-3.054850e+02	-3.073475e+02	-1.920431e+02	-1.963765e+02	2.667766e+02	1.016129e+02
2.460000e+02	2.512385e+03	7.396446e+02	7.059508e+02	2.979295e+02	8.996935e+01	3.850211e+02	-1.577443e+02	1.545713e+02	3.456456e+02	3.603062e+02	5.367313e+02	-2.534500e+02	-2.388012e+02	-1.808535e+02	-1.824599e+02	2.724270e+02	1.560856e+02
2.470000e+02	2.593095e+03	8.165408e+02	7.073236e+02	3.675897e+02	1.265624e+02	3.966825e+02	-1.125481e+02	1.497593e+02	3.632355e+02	3.440893e+02	5.265976e+02	-1.899744e+02	-1.590070e+02	-1.633930e+02	-1.651419e+02	2.917017e+02	2.240563e+02
2.480000e+02	2.670668e+03	9.051260e+02	7.154755e+02	4.359272e+02	1.736255e+02	4.102397e+02	-6.442974e+01	1.554818e+02	3.882747e+02	3.272020e+02	5.142546e+02	-1.240661e+02	-7.832640e+01	-1.433945e+02	-1.474681e+02	3.210907e+02	2.987211e+02
2.490000e+02	2.729973e+03	9.921596e+02	7.291637e+02	4.959993e+02	2.224025e+02	4.256874e+02	-2.105675e+01	1.682248e+02	4.147841e+02	3.143808e+02	5.034381e+02	-6.493901e+01	-7.437549e+00	-1.248887e+02	-1.323640e+02	3.547636e+02	3.712426e+02
2.500000e+02	2.760179e+03	1.063134e+03	7.446820e+02	5.416257e+02	2.639299e+02	4.416114e+02	1.125673e+01	1.831019e+02	4.361705e+02	3.085127e+02	4.966679e+02	-1.995359e+01	4.495916e+01	-1.109959e+02	-1.218427e+02	3.857697e+02	4.319371e+02
2.510000e+02	2.757061e+03	1.105496e+03	7.565844e+02	5.683694e+02	2.909971e+02	4.552467e+02	2.912389e+01	1.951100e+02	4.469220e+02	3.096634e+02	4.944068e+02	6.895991e+00	7.396402e+01	-1.030745e+02	-1.164602e+02	4.074547e+02	4.719288e+02
2.520000e+02	2.722901e+03	1.111483e+03	7.589448e+02	5.742181e+02	2.996538e+02	4.631359e+02	3.288467e+01	2.002698e+02	4.438499e+02	3.150956e+02	4.948896e+02	1.554451e+01	7.932998e+01	-1.004426e+02	-1.151564e+02	4.148082e+02	4.849290e+02
2.530000e+02	2.664227e+03	1.079724e+03	7.468165e+02	5.598555e+02	2.899817e+02	4.621058e+02	2.632229e+01	1.963609e+02	4.265207e+02	3.202962e+02	4.946781e+02	9.401587e+00	6.517893e+01	-1.006594e+02	-1.154881e+02	4.054685e+02	4.686703e+02
2.540000e+02	2.588530e+03	1.015178e+03	7.174612e+02	5.284656e+02	2.659940e+02	4.501592e+02	1.538730e+01	1.831195e+02	3.968617e+02	3.205995e+02	4.897182e+02	-5.874179e+00	3.874883e+01	-1.002012e+02	-1.141731e+02	3.801665e+02	4.255380e+02
2.550000e+02	2.501451e+03	9.276020e+02	6.710070e+02	4.850976e+02	2.346622e+02	4.269908e+02	6.381126e+00	1.619544e+02	3.582321e+02	3.127744e+02	4.765424e+02	-2.395279e+01	8.556411e+00	-9.532176e+01	-1.078360e+02	3.424983e+02	3.621398e+02
2.560000e+02	2.405615e+03	8.291591e+02	6.104266e+02	4.357321e+02	2.042525e+02	3.940680e+02	4.213444e+00	1.353646e+02	3.143996e+02	2.960261e+02	4.532870e+02	-3.932758e+01	-1.755396e+01	-8.292265e+01	-9.382908e+01	2.980824e+02	2.878865e+02
2.570000e+02	2.301461e+03	7.320157e+02	5.409576e+02	3.862821e+02	1.823452e+02	3.543918e+02	1.125728e+01	1.062805e+02	2.688078e+02	2.721485e+02	4.203050e+02	-4.839261e+01	-3.402216e+01	-6.129426e+01	-7.098663e+01	2.533331e+02	2.129975e+02
2.580000e+02	2.189466e+03	6.465313e+02	4.692056e+02	3.417650e+02	1.740569e+02	3.120829e+02	2.705353e+01	7.751735e+01	2.243148e+02	2.448892e+02	3.802592e+02	-4.992081e+01	-3.849365e+01	-3.061332e+01	-4.014057e+01	2.141990e+02	1.465368e+02
2.590000e+02	2.072564e+03	5.802814e+02	4.021554e+02	3.057795e+02	1.809712e+02	2.718508e+02	4.879601e+01	5.144664e+01	1.833388e+02	2.188148e+02	3.376636e+02	-4.492694e+01	-3.188387e+01	6.896197e+00	-4.240375e+00	1.852133e+02	9.502848e+01
2.600000e+02	1.957531e+03	5.377616e+02	3.462253e+02	2.802735e+02	2.010774e+02	2.383465e+02	7.228585e+01	2.989368e+01	1.481630e+02	1.980605e+02	2.979417e+02	-3.605601e+01	-1.766819e+01	4.717896e+01	3.199948e+01	1.690796e+02	6.193977e+01
2.610000e+02	1.854684e+03	5.204510e+02	3.064389e+02	2.655059e+02	2.296788e+02	2.154389e+02	9.295232e+01	1.417499e+01	1.210872e+02	1.853501e+02	2.662222e+02	-2.675613e+01	-7.164383e-01	8.489959e+01	6.286312e+01	1.668172e+02	4.798471e+01
2.620000e+02	1.775998e+03	5.269965e+02	2.857858e+02	2.601317e+02	2.609093e+02	2.055804e+02	1.066095e+02	5.126782e+00	1.041981e+02	1.815863e+02	2.462377e+02	-2.052576e+01	1.389377e+01	1.142130e+02	8.261503e+01	1.782956e+02	5.195947e+01
2.630000e+02	1.732439e+03	5.534925e+02	2.848681e+02	2.614408e+02	2.893230e+02	2.094943e+02	1.098152e+02	2.991628e+00	9.873094e+01	1.861360e+02	2.397075e+02	-2.043444e+01	2.173291e+01	1.296144e+02	8.645654e+01	2.028674e+02	7.173227e+01
2.640000e+02	1.731477e+03	5.939983e+02	3.019166e+02	2.658496e+02	3.110640e+02	2.263255e+02	9.993840e+01	7.140781e+00	1.042523e+02	1.976634e+02	2.464071e+02	-2.892528e+01	1.944214e+01	1.267684e+02	7.127597e+01	2.397887e+02	1.050571e+02
2.650000e+02	1.775509e+03	6.414194e+02	3.331841e+02	2.696902e+02	3.243492e+02	2.541603e+02	7.520453e+01	1.577587e+01	1.180863e+02	2.150973e+02	2.647958e+02	-4.771760e+01	4.893846e+00	1.032791e+02	3.614120e+01	2.882082e+02	1.499832e+02
2.660000e+02	1.861388e+03	6.886987e+02	3.736212e+02	2.701752e+02	3.292758e+02	2.906059e+02	3.498271e+01	2.587854e+01	1.354135e+02	2.382076e+02	2.927920e+02	-7.756745e+01	-2.261746e+01	5.937572e+01	-1.741592e+01	3.466916e+02	2.047569e+02
2.670000e+02	1.980893e+03	7.300413e+02	4.176802e+02	2.662396e+02	3.271966e+02	3.330805e+02	-1.963645e+01	3.365616e+01	1.502501e+02	2.674302e+02	3.282287e+02	-1.177848e+02	-6.198988e+01	-1.583739e+00	-8.528701e+01	4.124832e+02	2.672661e+02
2.680000e+02	2.121823e+03	7.618094e+02	4.601054e+02	2.588903e+02	3.199839e+02	3.786802e+02	-8.523231e+01	3.553193e+01	1.571226e+02	3.029831e+02	3.687637e+02	-1.656839e+02	-1.098742e+02	-7.301228e+01	-1.609296e+02	4.809126e+02	3.342810e+02
2.690000e+02	2.269558e+03	7.828148e+02	4.966231e+02	2.508249e+02	3.094396e+02	4.238177e+02	-1.558885e+02	2.942520e+01	1.528778e+02	3.437459e+02	4.114105e+02	-2.163741e+02	-1.605865e+02	-1.456809e+02	-2.359604e+02	5.453989e+02	4.009120e+02
2.700000e+02	2.409015e+03	7.939694e+02	5.244754e+02	2.453651e+02	2.969634e+02	4.640527e+02	-2.238742e+02	1.582402e+01	1.379034e+02	3.865728e+02	4.521469e+02	-2.632877e+02	-2.067828e+02	-2.091525e+02	-3.013541e+02	5.983162e+02	4.607274e+02
2.710000e+02	2.526847e+03	7.974719e+02	5.427233e+02	2.450757e+02	2.834468e+02	4.944744e+02	-2.811956e+02	-1.875292e+00	1.161986e+02	4.265257e+02	4.860533e+02	-2.995244e+02	-2.409786e+02	-2.538984e+02	-3.491443e+02	6.325896e+02	5.067291e+02
2.720000e+02	2.613525e+03	7.958219e+02	5.522144e+02	2.506331e+02	2.692986e+02	5.106713e+02	-3.215347e+02	-1.804191e+01	9.418031e+01	4.580351e+02	5.081222e+02	-3.196247e+02	-2.574900e+02	-2.735364e+02	-3.741708e+02	6.434677e+02	5.329561e+02
2.730000e+02	2.664668e+03	7.909409e+02	5.551344e+02	2.604494e+02	2.545359e+02	5.099271e+02	-3.417697e+02	-2.635475e+01	7.863821e+01	4.764973e+02	5.144661e+02	-3.210412e+02	-2.540175e+02	-2.664005e+02	-3.751993e+02	6.297334e+02	5.360851e+02
2.740000e+02	2.681120e+03	7.836101e+02	5.542023e+02	2.712552e+02	2.389390e+02	4.920764e+02	-3.423808e+02	-2.167728e+01	7.462239e+01	4.795809e+02	5.033898e+02	-3.046256e+02	-2.321354e+02	-2.357817e+02	-3.548759e+02	5.938130e+02	5.163127e+02
2.750000e+02	2.667616e+03	7.733621e+02	5.517471e+02	2.794153e+02	2.223027e+02	4.595795e+02	-3.265650e+02	-1.557700e+00	8.406912e+01	4.676788e+02	4.758427e+02	-2.738904e+02	-1.964281e+02	-1.886724e+02	-3.184652e+02	5.407660e+02	4.771188e+02
2.760000e+02	2.630507e+03	7.588782e+02	5.490256e+02	2.824109e+02	2.047774e+02	4.167510e+02	-2.985449e+02	3.319331e+01	1.056414e+02	4.433848e+02	4.350796e+02	-2.334219e+02	-1.526694e+02	-1.334797e+02	-2.719105e+02	4.766860e+02	4.240719e+02
2.770000e+02	2.575404e+03	7.388069e+02	5.460677e+02	2.798339e+02	1.871885e+02	3.684889e+02	-2.619505e+02	7.899307e+01	1.357296e+02	4.103385e+02	3.857264e+02	-1.872409e+02	-1.058932e+02	-7.761604e+01	-2.201002e+02	4.072868e+02	3.632896e+02
2.780000e+02	2.505651e+03	7.127259e+02	5.420899e+02	2.734582e+02	1.711539e+02	3.190504e+02	-2.190514e+02	1.307458e+02	1.700743e+02	3.720158e+02	3.326639e+02	-1.378859e+02	-5.920648e+01	-2.588308e+01	-1.660853e+02	3.372373e+02	3.002413e+02
2.790000e+02	2.422173e+03	6.818264e+02	5.362210e+02	2.663740e+02	1.588424e+02	2.713315e+02	-1.710756e+02	1.832958e+02	2.052612e+02	3.309598e+02	2.801240e+02	-8.655095e+01	-1.375076e+01	1.985169e+01	-1.114465e+02	2.702871e+02	2.392522e+02
2.800000e+02	2.324612e+03	6.489323e+02	5.281245e+02	2.615934e+02	1.523647e+02	2.268157e+02	-1.192202e+02	2.325118e+02	2.394712e+02	2.886531e+02	2.312131e+02	-3.401895e+01	3.037955e+01	5.980022e+01	-5.738179e+01	2.097448e+02	1.836008e+02
2.810000e+02	2.213130e+03	6.177348e+02	5.181901e+02	2.607516e+02	1.529864e+02	1.860428e+02	-6.561351e+01	2.756978e+02	2.722763e+02	2.459135e+02	1.878686e+02	1.825961e+01	7.288231e+01	9.481774e+01	-5.741773e+00	1.587266e+02	1.358102e+02
2.820000e+02	2.090014e+03	5.915196e+02	5.072458e+02	2.634596e+02	1.604850e+02	1.492776e+02	-1.360692e+01	3.113799e+02	3.037339e+02	2.035115e+02	1.511279e+02	6.759408e+01	1.123312e+02	1.251217e+02	4.062807e+01	1.198556e+02	9.776841e+01
2.830000e+02	1.960368e+03	5.719597e+02	4.960327e+02	2.675386e+02	1.729558e+02	1.170531e+02	3.276486e+01	3.387889e+02	3.333360e+02	1.626965e+02	1.215396e+02	1.102949e+02	1.459985e+02	1.496918e+02	7.840922e+01	9.454562e+01	7.058572e+01
2.840000e+02	1.831590e+03	5.585446e+02	4.848047e+02	2.699686e+02	1.871932e+02	9.038746e+01	6.982466e+01	3.574205e+02	3.593844e+02	1.254200e+02	9.955093e+01	1.425845e+02	1.704173e+02	1.664838e+02	1.048582e+02	8.233441e+01	5.436568e+01
2.850000e+02	1.711859e+03	5.489101e+02	4.732977e+02	2.680957e+02	1.995346e+02	7.062509e+01	9.522916e+01	3.669239e+02	3.791095e+02	9.418808e+01	8.572606e+01	1.617220e+02	1.823695e+02	1.732272e+02	1.187930e+02	8.074142e+01	4.814372e+01
2.860000e+02	1.608207e+03	5.398895e+02	4.610644e+02	2.605807e+02	2.068653e+02	5.898674e+01	1.084216e+02	3.673285e+02	3.894694e+02	7.159502e+01	8.070394e+01	1.668449e+02	1.798768e+02	1.683949e+02	1.210306e+02	8.583485e+01	5.012325e+01
2.870000e+02	1.524910e+03	5.287802e+02	4.479417e+02	2.477498e+02	2.074297e+02	5.600295e+01	1.104325e+02	3.594149e+02	3.882532e+02	5.968871e+01	8.490198e+01	1.592230e+02	1.628480e+02	1.519445e+02	1.141188e+02	9.331139e+01	5.813825e+01
2.880000e+02	1.462758e+03	5.142745e+02	4.343589e+02	2.312933e+02	2.011866e+02	6.105079e+01	1.032330e+02	3.449608e+02	3.749928e+02	5.936642e+01	9.808817e+01	1.418952e+02	1.332055e+02	1.255919e+02	1.015490e+02	9.963831e+01	7.013897e+01
2.890000e+02	1.419481e+03	4.967090e+02	4.212922e+02	2.135153e+02	1.896153e+02	7.219538e+01	8.901167e+01	3.266629e+02	3.512920e+02	7.000060e+01	1.190168e+02	1.188860e+02	9.449895e+01	9.256549e+01	8.681712e+01	1.027991e+02	8.449624e+01
2.900000e+02	1.391165e+03	4.776112e+02	4.098646e+02	1.964470e+02	1.750573e+02	8.644335e+01	6.968827e+01	3.076913e+02	3.204390e+02	8.942611e+01	1.453001e+02	9.427374e+01	5.114736e+01	5.695484e+01	7.267112e+01	1.023873e+02	1.000212e+02
2.910000e+02	1.374186e+03	4.587934e+02	4.007560e+02	1.811034e+02	1.598141e+02	1.003633e+02	4.678814e+01	2.910052e+02	2.864532e+02	1.143033e+02	1.735776e+02	7.135258e+01	7.526330e+00	2.285942e+01	6.072811e+01	9.908709e+01	1.157309e+02
2.920000e+02	1.366948e+03	4.413827e+02	3.936705e+02	1.670614e+02	1.452957e+02	1.108772e+02	2.159770e+01	2.786533e+02	2.529236e+02	1.407475e+02	1.999195e+02	5.204413e+01	-3.285773e+01	-6.424580e+00	5.146788e+01	9.382886e+01	1.305019e+02
2.930000e+02	1.370794e+03	4.251714e+02	3.870937e+02	1.524462e+02	1.315231e+02	1.159483e+02	-4.583576e+00	2.713004e+02	2.220569e+02	1.650374e+02	2.203355e+02	3.665261e+01	-6.788899e+01	-2.896499e+01	4.450528e+01	8.701872e+01	1.428077e+02
2.940000e+02	1.389691e+03	4.085626e+02	3.784918e+02	1.343697e+02	1.172035e+02	1.149333e+02	-3.026561e+01	2.681457e+02	1.942783e+02	1.842142e+02	2.312822e+02	2.402320e+01	-9.691225e+01	-4.435368e+01	3.901504e+01	7.818930e+01	1.507188e+02
2.950000e+02	1.428740e+03	3.891900e+02	3.649806e+02	1.098082e+02	1.004166e+02	1.085009e+02	-5.374954e+01	2.672859e+02	1.685380e+02	1.964433e+02	2.301369e+02	1.211293e+01	-1.203285e+02	-5.342914e+01	3.419257e+01	6.622463e+01	1.522471e+02
2.960000e+02	1.491989e+03	3.650663e+02	3.443552e+02	7.679075e+01	7.970453e+01	9.819840e+01	-7.326460e+01	2.664435e+02	1.432487e+02	2.011074e+02	2.156442e+02	-1.121693e+00	-1.388534e+02	-5.766667e+01	2.964403e+01	5.006097e+01	1.459635e+02
2.970000e+02	1.580345e+03	3.358978e+02	3.162272e+02	3.559600e+01	5.515685e+01	8.586739e+01	-8.719970e+01	2.638740e+02	1.175555e+02	1.986727e+02	1.883150e+02	-1.675806e+01	-1.527190e+02	-5.846960e+01	2.560523e+01	2.955199e+01	1.316746e+02
2.980000e+02	1.690383e+03	3.040903e+02	2.829027e+02	-1.048520e+01	2.902131e+01	7.314644e+01	-9.434358e+01	2.591939e+02	9.249149e+01	1.904124e+02	1.506682e+02	-3.419498e+01	-1.611533e+02	-5.664369e+01	2.292199e+01	6.099682e+00	1.108709e+02
2.990000e+02	1.814577e+03	2.750013e+02	2.495962e+02	-5.524233e+01	5.529380e+00	6.122184e+01	-9.403829e+01	2.538498e+02	7.153536e+01	1.780622e+02	1.071394e+02	-5.098975e+01	-1.623815e+02	-5.225912e+01	2.280158e+01	-1.727171e+01	8.671214e+01
3.000000e+02	1.942938e+03	2.561793e+02	2.236752e+02	-9.067615e+01	-1.007204e+01	5.085397e+01	-8.616871e+01	2.509983e+02	6.021570e+01	1.634610e+02	6.350476e+01	-6.335422e+01	-1.541805e+02	-4.491839e+01	2.643789e+01	-3.650919e+01	6.346750e+01
3.010000e+02	2.065468e+03	2.556260e+02	2.128996e+02	-1.089656e+02	-1.297236e+01	4.257010e+01	-7.097904e+01	2.546969e+02	6.468931e+01	1.482118e+02	2.581213e+01	-6.716947e+01	-1.347772e+02	-3.424781e+01	3.466227e+01	-4.763351e+01	4.552832e+01
3.020000e+02	2.174437e+03	2.794593e+02	2.230111e+02	-1.047061e+02	-2.363995e-01	3.684376e+01	-4.881610e+01	2.685297e+02	8.961582e+01	1.333969e+02	-9.684384e-01	-5.918873e+01	-1.037371e+02	-2.033098e+01	4.773667e+01	-4.797148e+01	3.628314e+01
3.030000e+02	2.265605e+03	3.296374e+02	2.554139e+02	-7.669468e+01	2.825151e+01	3.410727e+01	-1.998383e+01	2.940562e+02	1.360137e+02	1.194019e+02	-1.418926e+01	-3.805370e+01	-6.250479e+01	-3.865385e+00	6.531042e+01	-3.705679e+01	3.722106e+01
3.040000e+02	2.337952e+03	4.025355e+02	3.058454e+02	-2.865923e+01	6.963744e+01	3.455572e+01	1.513058e+01	3.296650e+02	1.999416e+02	1.059054e+02	-1.424283e+01	-4.841024e+00	-1.441586e+01	1.399787e+01	8.647990e+01	-1.683981e+01	4.758155e+01
3.050000e+02	2.392262e+03	4.890177e+02	3.647314e+02	3.131206e+01	1.187754e+02	3.783311e+01	5.565420e+01	3.704049e+02	2.726704e+02	9.206257e+01	-4.487287e+00	3.698401e+01	3.579967e+01	3.199611e+01	1.098832e+02	8.895315e+00	6.469340e+01
3.060000e+02	2.429410e+03	5.762051e+02	4.193444e+02	9.245563e+01	1.695115e+02	4.277220e+01	9.974875e+01	4.090631e+02	3.424999e+02	7.684610e+01	9.600544e+00	8.217258e+01	8.285508e+01	4.908221e+01	1.338222e+02	3.569286e+01	8.489265e+01
3.070000e+02	2.449310e+03	6.505126e+02	4.571594e+02	1.436077e+02	2.161754e+02	4.734216e+01	1.443636e+02	4.382502e+02	3.977224e+02	5.943845e+01	2.173658e+01	1.246965e+02	1.218707e+02	6.461012e+01	1.564594e+02	5.971976e+01	1.046765e+02
3.080000e+02	2.451010e+03	7.009811e+02	4.692626e+02	1.754216e+02	2.548228e+02	4.885992e+01	1.854520e+02	4.527468e+02	4.297331e+02	3.953097e+01	2.614953e+01	1.589033e+02	1.492712e+02	7.837578e+01	1.761225e+02	7.870417e+01	1.216536e+02
3.090000e+02	2.433737e+03	7.217571e+02	4.526027e+02	1.819848e+02	2.838590e+02	4.440885e+01	2.186475e+02	4.511556e+02	4.351862e+02	1.741790e+01	1.851769e+01	1.805349e+02	1.634658e+02	9.058371e+01	1.916559e+02	9.220681e+01	1.349547e+02
3.100000e+02	2.398180e+03	7.128980e+02	4.103332e+02	1.615614e+02	3.038921e+02	3.135318e+01	2.401625e+02	4.361376e+02	4.164671e+02	-6.132518e+00	-3.628602e+00	1.873625e+02	1.651882e+02	1.017869e+02	2.026761e+02	1.012195e+02	1.450223e+02
3.110000e+02	2.347205e+03	6.793777e+02	3.502781e+02	1.164851e+02	3.169392e+02	7.863451e+00	2.475704e+02	4.131134e+02	3.804078e+02	-3.012823e+01	-4.090320e+01	1.793167e+02	1.573860e+02	1.127727e+02	2.095780e+02	1.073643e+02	1.529741e+02
3.120000e+02	2.285578e+03	6.288793e+02	2.822718e+02	5.244085e+01	3.253313e+02	-2.656617e+01	2.402299e+02	3.880007e+02	3.358193e+02	-5.354618e+01	-9.215429e+01	1.581659e+02	1.445926e+02	1.243301e+02	2.132490e+02	1.120848e+02	1.598605e+02
3.130000e+02	2.218849e+03	5.693418e+02	2.154610e+02	-2.257538e+01	3.307270e+02	-7.060612e+01	2.192971e+02	3.649707e+02	2.907726e+02	-7.531022e+01	-1.543941e+02	1.269303e+02	1.318161e+02	1.368824e+02	2.145921e+02	1.161368e+02	1.660865e+02
3.140000e+02	2.152048e+03	5.071377e+02	1.564964e+02	-9.941468e+01	3.335333e+02	-1.206537e+02	1.874313e+02	3.451629e+02	2.505250e+02	-9.402725e+01	-2.225635e+02	8.924780e+01	1.231463e+02	1.500845e+02	2.140567e+02	1.194778e+02	1.710983e+02
3.150000e+02	2.088893e+03	4.463158e+02	1.090115e+02	-1.689712e+02	3.328268e+02	-1.706704e+02	1.483345e+02	3.268220e+02	2.166502e+02	-1.076374e+02	-2.894222e+02	4.883549e+01	1.204486e+02	1.625723e+02	2.113665e+02	1.214609e+02	1.733167e+02
3.160000e+02	2.031934e+03	3.888441e+02	7.419893e+01	-2.233940e+02	3.266890e+02	-2.125743e+02	1.062215e+02	3.066735e+02	1.874630e+02	-1.132628e+02	-3.459913e+02	9.077107e+00	1.225953e+02	1.720344e+02	2.055319e+02	1.211569e+02	1.702978e+02
3.170000e+02	1.983476e+03	3.354683e+02	5.190277e+01	-2.572298e+02	3.127969e+02	-2.373814e+02	6.524918e+01	2.818354e+02	1.594214e+02	-1.075174e+02	-3.828209e+02	-2.730020e+01	1.255894e+02	1.756521e+02	1.951121e+02	1.176841e+02	1.591842e+02
3.180000e+02	1.946615e+03	2.867355e+02	4.159078e+01	-2.682867e+02	2.891395e+02	-2.370169e+02	2.894493e+01	2.513956e+02	1.289404e+02	-8.734839e+01	-3.919485e+02	-5.848439e+01	1.236606e+02	1.707841e+02	1.786122e+02	1.105262e+02	1.375236e+02
3.190000e+02	1.925652e+03	2.438284e+02	4.280136e+01	-2.579378e+02	2.547698e+02	-2.063780e+02	-2.831195e-01	2.170005e+02	9.400156e+01	-5.119892e+01	-3.689838e+02	-8.374089e+01	1.110450e+02	1.556609e+02	1.548947e+02	9.987367e+01	1.043848e+02
3.200000e+02	1.925457e+03	2.089858e+02	5.501212e+01	-2.306671e+02	2.104897e+02	-1.450121e+02	-2.142857e+01	1.822713e+02	5.507924e+01	-6.581078e-02	-3.145424e+02	-1.034099e+02	8.387451e+01	1.298620e+02	1.235165e+02	8.697148e+01	6.143406e+01
3.210000e+02	1.949991e+03	1.853791e+02	7.717232e+01	-1.928931e+02	1.592851e+02	-5.780965e+01	-3.487313e+01	1.513714e+02	1.516415e+01	6.200952e+01	-2.344219e+02	-1.186958e+02	4.152818e+01	9.445873e+01	8.494469e+01	7.433849e+01	1.342790e+01
3.220000e+02	2.000701e+03	1.764152e+02	1.072644e+02	-1.513835e+02	1.062665e+02	4.559345e+01	-4.208660e+01	1.273663e+02	-2.103599e+01	1.283018e+02	-1.383830e+02	-1.312835e+02	-1.300133e+01	5.184103e+01	4.062032e+01	6.564415e+01	-3.235456e+01
3.230000e+02	2.075603e+03	1.845990e+02	1.421944e+02	-1.117384e+02	5.791965e+01	1.525936e+02	-4.515430e+01	1.110470e+02	-4.839873e+01	1.905945e+02	-3.793146e+01	-1.428877e+02	-7.380781e+01	5.332900e+00	-7.154857e+00	6.507240e+01	-6.783225e+01
3.240000e+02	2.169453e+03	2.103046e+02	1.781268e+02	-7.737311e+01	2.069065e+01	2.501126e+02	-4.628505e+01	1.006422e+02	-6.275984e+01	2.408880e+02	5.615583e+01	-1.548595e+02	-1.335299e+02	-4.128545e+01	-5.551113e+01	7.619962e+01	-8.652460e+01
3.250000e+02	2.274821e+03	2.509676e+02	2.111770e+02	-4.921201e+01	-7.508548e-01	3.271530e+02	-4.740810e+01	9.246961e+01	-6.195138e+01	2.731297e+02	1.358065e+02	-1.679212e+02	-1.850195e+02	-8.425691e+01	-1.014329e+02	1.006798e+02	-8.573394e+01
3.260000e+02	2.383446e+03	3.011842e+02	2.382445e+02	-2.601742e+01	-4.963014e+00	3.767880e+02	-4.988078e+01	8.223738e+01	-4.623301e+01	2.844786e+02	1.966443e+02	-1.820260e+02	-2.226625e+02	-1.202605e+02	-1.421916e+02	1.372264e+02	-6.757342e+01
3.270000e+02	2.487238e+03	3.539016e+02	2.577309e+02	-5.089890e+00	5.737614e+00	3.971399e+02	-5.427144e+01	6.652531e+01	-1.803699e+01	2.757687e+02	2.379157e+02	-1.962964e+02	-2.430061e+02	-1.466990e+02	-1.756439e+02	1.813794e+02	-3.833829e+01
3.280000e+02	2.578719e+03	4.024128e+02	2.699408e+02	1.695222e+01	2.601690e+01	3.911962e+02	-6.019448e+01	4.397105e+01	1.884709e+01	2.510942e+02	2.616300e+02	-2.090178e+02	-2.446778e+02	-1.618204e+02	-2.002975e+02	2.263124e+02	-6.420401e+00
3.290000e+02	2.651125e+03	4.424500e+02	2.770491e+02	4.350337e+01	4.937971e+01	3.656262e+02	-6.623802e+01	1.582081e+01	6.034976e+01	2.166996e+02	2.713766e+02	-2.177244e+02	-2.278726e+02	-1.646784e+02	-2.151655e+02	2.645433e+02	2.041717e+01
3.300000e+02	2.698683e+03	4.735549e+02	2.826321e+02	7.746958e+01	7.049049e+01	3.290194e+02	-7.007683e+01	-1.429612e+01	1.030851e+02	1.795471e+02	2.712713e+02	-2.194573e+02	-1.938005e+02	-1.550020e+02	-2.195498e+02	2.900385e+02	3.736531e+01
3.310000e+02	2.717421e+03	4.991816e+02	2.908678e+02	1.209198e+02	8.706711e+01	2.900693e+02	-6.885043e+01	-4.129727e+01	1.448858e+02	1.459819e+02	2.652968e+02	-2.112432e+02	-1.443751e+02	-1.330827e+02	-2.129383e+02	3.000038e+02	4.370899e+01
3.320000e+02	2.706499e+03	5.255186e+02	3.056053e+02	1.748710e+02	1.005991e+02	2.561424e+02	-5.980403e+01	-6.002269e+01	1.847924e+02	1.208127e+02	2.570531e+02	-1.907544e+02	-8.217977e+01	-9.976658e+01	-1.951341e+02	2.957316e+02	4.255533e+01
3.330000e+02	2.669551e+03	5.595021e+02	3.295384e+02	2.392040e+02	1.155979e+02	2.324397e+02	-4.107838e+01	-6.667556e+01	2.226217e+02	1.069164e+02	2.497304e+02	-1.570070e+02	-1.052370e+01	-5.656681e+01	-1.666019e+02	2.821981e+02	3.946950e+01
3.340000e+02	2.615322e+03	6.066994e+02	3.636770e+02	3.126939e+02	1.376506e+02	2.217036e+02	-1.244972e+01	-5.992625e+01	2.584065e+02	1.052702e+02	2.460458e+02	-1.109063e+02	6.665095e+01	-5.832434e+00	-1.288833e+02	2.665321e+02	4.062417e+01
3.350000e+02	2.556907e+03	6.696220e+02	4.071879e+02	3.930963e+02	1.709909e+02	2.242672e+02	2.420656e+01	-4.137427e+01	2.919940e+02	1.151936e+02	2.479723e+02	-5.546285e+01	1.451268e+02	4.914366e+01	-8.486703e+01	2.558559e+02	5.103954e+01
3.360000e+02	2.509342e+03	7.467632e+02	4.575566e+02	4.772255e+02	2.164629e+02	2.382535e+02	6.491654e+01	-1.525016e+01	3.229463e+02	1.346100e+02	2.562718e+02	4.421409e+00	2.209562e+02	1.041984e+02	-3.872690e+01	2.551876e+02	7.328436e+01
3.370000e+02	2.485956e+03	8.324540e+02	5.109615e+02	5.610244e+02	2.706094e+02	2.598633e+02	1.041633e+02	1.254683e+01	3.506961e+02	1.602649e+02	2.700309e+02	6.261215e+01	2.909957e+02	1.546375e+02	4.564939e+00	2.660419e+02	1.068085e+02
3.380000e+02	2.494479e+03	9.175715e+02	5.627839e+02	6.397356e+02	3.262319e+02	2.838269e+02	1.359407e+02	3.581224e+01	3.747986e+02	1.879847e+02	2.864912e+02	1.127660e+02	3.532461e+02	1.958538e+02	4.009847e+01	2.861305e+02	1.479764e+02
3.390000e+02	2.534241e+03	9.911125e+02	6.082502e+02	7.083315e+02	3.742756e+02	3.041386e+02	1.550813e+02	4.946138e+01	3.951257e+02	2.131238e+02	3.014149e+02	1.495445e+02	4.069179e+02	2.241418e+02	6.406645e+01	3.102060e+02	1.908221e+02
3.400000e+02	2.595614e+03	1.042501e+03	6.432094e+02	7.622763e+02	4.064500e+02	3.150945e+02	1.585049e+02	5.069235e+01	4.119275e+02	2.312809e+02	3.100326e+02	1.697609e+02	4.522447e+02	2.375304e+02	7.469125e+01	3.317555e+02	2.284422e+02
3.410000e+02	2.662147e+03	1.064207e+03	6.649697e+02	7.984865e+02	4.177445e+02	3.124727e+02	1.460150e+02	3.964501e+01	4.257682e+02	2.392003e+02	3.083587e+02	1.731634e+02	4.901284e+02	2.363967e+02	7.274250e+01	3.449987e+02	2.547510e+02
3.420000e+02	2.714906e+03	1.053948e+03	6.729863e+02	8.161697e+02	4.080410e+02	2.945280e+02	1.203979e+02	1.942969e+01	4.373852e+02	2.355996e+02	2.944337e+02	1.626147e+02	5.217363e+02	2.236519e+02	6.146955e+01	3.465682e+02	2.661145e+02
3.430000e+02	2.737696e+03	1.015735e+03	6.691374e+02	8.171885e+02	3.823430e+02	2.624417e+02	8.681624e+01	-4.470748e+00	4.475363e+02	2.215995e+02	2.689907e+02	1.435819e+02	5.481977e+02	2.044047e+02	4.597405e+01	3.363659e+02	2.623251e+02
3.440000e+02	2.721484e+03	9.592798e+02	6.574257e+02	8.057735e+02	3.496154e+02	2.200028e+02	5.172351e+01	-2.529291e+01	4.569088e+02	2.005151e+02	2.352175e+02	1.230564e+02	5.705554e+02	1.851659e+02	3.223577e+01	3.173767e+02	2.465527e+02
3.450000e+02	2.666610e+03	8.979275e+02	6.431596e+02	7.876868e+02	3.206602e+02	1.725682e+02	2.164973e+01	-3.634153e+01	4.661601e+02	1.769976e+02	1.976506e+02	1.081871e+02	5.900352e+02	1.727785e+02	2.607903e+01	2.945785e+02	2.242827e+02
3.460000e+02	2.582196e+03	8.457138e+02	6.318683e+02	7.691375e+02	3.056812e+02	1.256353e+02	2.164327e+00	-3.230870e+01	4.760980e+02	1.557684e+02	1.606348e+02	1.049618e+02	6.085014e+02	1.732875e+02	3.229740e+01	2.733814e+02	2.016380e+02
3.470000e+02	2.483086e+03	8.144215e+02	6.282503e+02	7.557580e+02	3.121434e+02	8.351832e+01	-2.832480e+00	-1.030876e+01	4.878938e+02	1.403546e+02	1.270057e+02	1.172002e+02	6.287510e+02	1.909088e+02	5.400381e+01	2.581374e+02	1.836916e+02
3.480000e+02	2.385478e+03	8.113059e+02	6.353341e+02	7.517916e+02	3.433138e+02	4.856976e+01	8.502701e+00	2.952510e+01	5.031046e+02	1.322276e+02	9.755613e+01	1.459838e+02	6.542341e+02	2.271942e+02	9.216058e+01	2.511513e+02	1.733154e+02
3.490000e+02	2.302727e+03	8.378103e+02	6.538549e+02	7.594769e+02	3.976250e+02	2.113663e+01	3.581604e+01	8.391566e+01	5.232786e+02	1.305744e+02	7.146571e+01	1.895390e+02	6.880100e+02	2.804815e+02	1.452539e+02	2.523696e+02	1.708265e+02
3.500000e+02	2.242618e+03	8.892935e+02	6.817886e+02	7.785892e+02	4.688582e+02	1.155296e-01	7.663110e+01	1.467435e+02	5.491092e+02	1.326775e+02	4.739642e+01	2.435456e+02	7.311919e+02	3.457834e+02	2.091932e+02	2.596639e+02	1.743599e+02
3.510000e+02	2.206821e+03	9.557017e+02	7.141006e+02	8.062163e+02	5.471111e+02	-1.626319e+01	1.266845e+02	2.097312e+02	5.794199e+02	1.346786e+02	2.464491e+01	3.018486e+02	7.815709e+02	4.153112e+02	2.776265e+02	2.694842e+02	1.806656e+02
3.520000e+02	2.192422e+03	1.023166e+03	7.429592e+02	8.369763e+02	6.204906e+02	-2.981293e+01	1.805859e+02	2.635139e+02	6.105187e+02	1.324384e+02	3.754276e+00	3.575330e+02	8.332219e+02	4.797589e+02	3.428374e+02	2.776532e+02	1.859979e+02
3.530000e+02	2.194697e+03	1.076500e+03	7.587455e+02	8.638610e+02	6.773546e+02	-4.212836e+01	2.327731e+02	2.991177e+02	6.364496e+02	1.222936e+02	-1.368980e+01	4.042355e+02	8.775511e+02	5.302198e+02	3.971953e+02	2.801600e+02	1.868783e+02
3.540000e+02	2.209900e+03	1.102355e+03	7.519957e+02	8.796643e+02	7.087305e+02	-5.460762e+01	2.785739e+02	3.097624e+02	6.503301e+02	1.016633e+02	-2.590954e+01	4.374333e+02	9.055743e+02	5.602942e+02	4.348450e+02	2.738867e+02	1.806801e+02
3.550000e+02	2.236901e+03	1.092432e+03	7.159826e+02	8.786684e+02	7.103556e+02	-6.851215e+01	3.150740e+02	2.926790e+02	6.464341e+02	6.954624e+01	-3.193946e+01	4.553672e+02	9.106085e+02	5.677364e+02	4.531326e+02	2.572247e+02	1.660723e+02
3.560000e+02	2.277140e+03	1.045884e+03	6.491762e+02	8.581071e+02	6.837860e+02	-8.485984e+01	3.415156e+02	2.503820e+02	6.222585e+02	2.691559e+01	-3.225038e+01	4.593155e+02	8.903584e+02	5.550724e+02	4.532912e+02	2.304967e+02	1.433438e+02
3.570000e+02	2.333141e+03	9.700295e+02	5.566169e+02	8.190040e+02	6.362299e+02	-1.041631e+02	3.591277e+02	1.907509e+02	5.797402e+02	-2.312504e+01	-2.869842e+01	4.531406e+02	8.477035e+02	5.289702e+02	4.401659e+02	1.960659e+02	1.145318e+02
3.580000e+02	2.406490e+03	8.789635e+02	4.494624e+02	7.662286e+02	5.791131e+02	-1.262424e+02	3.705117e+02	1.255211e+02	5.251201e+02	-7.565915e+01	-2.387585e+01	4.422898e+02	7.901058e+02	4.986077e+02	4.210951e+02	1.580196e+02	8.320776e+01
3.590000e+02	2.496315e+03	7.902564e+02	3.426011e+02	7.078426e+02	5.257127e+02	-1.503859e+02	3.788422e+02	6.734987e+01	4.675183e+02	-1.249182e+02	-2.023569e+01	4.325939e+02	7.280798e+02	4.735920e+02	4.043100e+02	1.214036e+02	5.381580e+01
3.600000e+02	2.598846e+03	7.206285e+02	2.510054e+02	6.538922e+02	4.883975e+02	-1.759334e+02	3.871187e+02	2.629543e+01	4.167906e+02	-1.657858e+02	-1.943169e+01	4.291848e+02	6.733258e+02	4.620178e+02	3.972664e+02	9.113118e+01	3.062462e+01
3.610000e+02	2.708005e+03	6.818404e+02	1.860569e+02	6.147782e+02	4.760636e+02	-2.030437e+02	3.975671e+02	6.972279e+00	3.814518e+02	-1.953952e+02	-2.214392e+01	4.356961e+02	6.369243e+02	4.690413e+02	4.052157e+02	7.084693e+01	1.657785e+01
3.620000e+02	2.816453e+03	6.780237e+02	1.531358e+02	5.993238e+02	4.923041e+02	-2.331793e+02	4.111691e+02	7.545480e+00	3.672938e+02	-2.141580e+02	-2.836281e+01	4.537360e+02	6.276891e+02	4.960943e+02	4.301907e+02	6.211146e+01	1.246516e+01
3.630000e+02	2.916493e+03	7.052337e+02	1.512607e+02	6.127806e+02	5.347284e+02	-2.688649e+02	4.273015e+02	2.105295e+01	3.769164e+02	-2.256553e+02	-3.785265e+01	4.825752e+02	6.506359e+02	5.407089e+02	4.705112e+02	6.421421e+01	1.679032e+01
3.640000e+02	3.000627e+03	7.533068e+02	1.747186e+02	6.551996e+02	5.956263e+02	-3.125742e+02	4.435739e+02	3.858079e+01	4.099607e+02	-2.352414e+02	-5.044592e+01	5.190638e+02	7.056483e+02	5.969107e+02	5.209068e+02	7.471565e+01	2.646577e+01
3.650000e+02	3.061989e+03	8.093636e+02	2.158258e+02	7.207112e+02	6.638565e+02	-3.650386e+02	4.560527e+02	5.300683e+01	4.636004e+02	-2.477736e+02	-6.595964e+01	5.578938e+02	7.866736e+02	6.561567e+02	5.733177e+02	9.053435e+01	3.812041e+01
3.660000e+02	3.095090e+03	8.617733e+02	2.675910e+02	7.981392e+02	7.274794e+02	-4.236275e+02	4.600065e+02	6.177052e+01	5.329190e+02	-2.653266e+02	-8.378424e+01	5.923197e+02	8.819260e+02	7.087384e+02	6.183074e+02	1.091672e+02	4.953328e+01
3.670000e+02	3.097093e+03	9.032960e+02	3.252705e+02	8.730200e+02	7.764010e+02	-4.815627e+02	4.510877e+02	6.755367e+01	6.111058e+02	-2.858336e+02	-1.024186e+02	6.153036e+02	9.754408e+02	7.454330e+02	6.468166e+02	1.295794e+02	6.063611e+01
3.680000e+02	3.069371e+03	9.324864e+02	3.864723e+02	9.306400e+02	8.042914e+02	-5.284983e+02	4.266013e+02	7.667023e+01	6.897419e+02	-3.032675e+02	-1.192786e+02	6.208377e+02	1.049920e+03	7.590432e+02	6.518316e+02	1.524547e+02	7.369780e+01
3.690000e+02	3.018703e+03	9.531425e+02	4.502113e+02	9.593412e+02	8.093143e+02	-5.525126e+02	3.863842e+02	9.594333e+01	7.595728e+02	-3.093592e+02	-1.309644e+02	6.050727e+02	1.090307e+03	7.454625e+02	6.295369e+02	1.797724e+02	9.262913e+01
3.700000e+02	2.957303e+03	9.722901e+02	5.157402e+02	9.532195e+02	7.936494e+02	-5.430030e+02	3.329411e+02	1.294546e+02	8.119718e+02	-2.962291e+02	-1.339296e+02	5.669331e+02	1.087150e+03	7.040523e+02	5.797141e+02	2.139304e+02	1.216743e+02
3.710000e+02	2.901148e+03	9.976123e+02	5.818922e+02	9.134817e+02	7.621902e+02	-4.935890e+02	2.708081e+02	1.765291e+02	8.408590e+02	-2.589643e+02	-1.253052e+02	5.081179e+02	1.038788e+03	6.373783e+02	5.054316e+02	2.567538e+02	1.639489e+02
3.720000e+02	2.866635e+03	1.035204e+03	6.471677e+02	8.480867e+02	7.209988e+02	-4.041035e+02	2.054524e+02	2.317108e+02	8.444190e+02	-1.972490e+02	-1.036028e+02	4.326295e+02	9.516910e+02	5.505630e+02	4.123056e+02	3.086885e+02	2.202807e+02
3.730000e+02	2.866255e+03	1.088160e+03	7.102372e+02	7.697519e+02	6.760325e+02	-2.810815e+02	1.421840e+02	2.865903e+02	8.258335e+02	-1.155941e+02	-6.913377e+01	3.461053e+02	8.388875e+02	4.505707e+02	3.076698e+02	3.683581e+02	2.886533e+02
3.740000e+02	2.904607e+03	1.156061e+03	7.702741e+02	6.928666e+02	6.324117e+02	-1.366808e+02	8.545768e+01	3.325919e+02	7.925405e+02	-2.226450e+01	-2.411910e+01	2.551855e+02	7.169881e+02	3.456235e+02	1.998723e+02	4.325348e+02	3.643353e+02
3.750000e+02	2.976231e+03	1.235164e+03	8.267208e+02	6.301645e+02	5.942147e+02	1.355525e+01	3.867437e+01	3.635407e+02	7.541367e+02	7.258577e+01	2.746970e+01	1.669863e+02	6.026977e+02	2.447353e+02	9.770310e+01	4.965071e+02	4.405992e+02
3.760000e+02	3.066388e+03	1.319104e+03	8.785875e+02	5.900813e+02	5.645915e+02	1.534447e+02	4.307899e+00	3.770865e+02	7.196485e+02	1.589404e+02	8.032582e+01	8.858287e+01	5.097587e+02	1.571850e+02	9.801628e+00	5.547853e+02	5.098313e+02
3.770000e+02	3.154959e+03	1.399992e+03	9.238116e+02	5.754920e+02	5.459297e+02	2.687771e+02	-1.594863e+01	3.746793e+02	6.951983e+02	2.286144e+02	1.284965e+02	2.636285e+01	4.469990e+02	9.173680e+01	-5.611328e+01	6.020384e+02	5.647924e+02
3.780000e+02	3.222417e+03	1.469843e+03	9.592676e+02	5.840540e+02	5.398808e+02	3.493054e+02	-2.125416e+01	3.604185e+02	6.829094e+02	2.763591e+02	1.663180e+02	-1.479156e+01	4.177397e+02	5.556548e+01	-9.420248e+01	6.340789e+02	5.997848e+02
3.790000e+02	3.255837e+03	1.522142e+03	9.816507e+02	6.098438e+02	5.471848e+02	3.898484e+02	-1.193625e+01	3.394515e+02	6.813344e+02	3.003170e+02	1.894445e+02	-3.235162e+01	4.204029e+02	5.307346e+01	-1.014696e+02	6.486502e+02	6.114933e+02
3.800000e+02	3.252712e+03	1.553151e+03	9.888981e+02	6.455886e+02	5.673672e+02	3.904450e+02	1.014225e+01	3.165689e+02	6.870162e+02	3.018824e+02	1.957112e+02	-2.673685e+01	4.498809e+02	8.494286e+01	-7.842222e+01	6.457854e+02	5.993377e+02
3.810000e+02	3.221128e+03	1.562567e+03	9.814332e+02	6.847076e+02	5.984720e+02	3.557077e+02	4.147515e+01	2.953583e+02	6.963557e+02	2.850778e+02	1.855798e+02	-1.363653e+00	4.991309e+02	1.477608e+02	-2.915638e+01	6.276248e+02	5.652972e+02
3.820000e+02	3.176327e+03	1.553299e+03	9.625456e+02	7.225908e+02	6.370149e+02	2.936955e+02	7.731242e+01	2.779457e+02	7.069260e+02	2.556196e+02	1.620528e+02	3.799438e+01	5.605409e+02	2.343779e+02	3.923507e+01	5.977768e+02	5.133352e+02
3.830000e+02	3.135147e+03	1.530509e+03	9.376373e+02	7.569262e+02	6.782899e+02	2.146762e+02	1.126030e+02	2.651384e+02	7.177507e+02	2.198866e+02	1.301277e+02	8.443060e+01	6.268012e+02	3.349170e+02	1.178122e+02	5.604753e+02	4.486838e+02
3.840000e+02	3.110550e+03	1.500323e+03	9.125971e+02	7.872315e+02	7.170682e+02	1.300256e+02	1.432435e+02	2.567438e+02	7.286012e+02	1.839957e+02	9.597628e+01	1.313814e+02	6.912578e+02	4.381640e+02	1.972128e+02	5.198536e+02	3.772709e+02
3.850000e+02	3.108195e+03	1.468669e+03	8.919312e+02	8.139490e+02	7.485924e+02	5.126821e+01	1.671957e+02	2.518972e+02	7.388308e+02	1.531001e+02	6.602539e+01	1.739182e+02	7.479261e+02	5.330325e+02	2.690269e+02	4.795642e+02	3.054521e+02
3.860000e+02	3.125956e+03	1.440534e+03	8.773283e+02	8.374879e+02	7.696492e+02	-1.094620e+01	1.850155e+02	2.493234e+02	7.464283e+02	1.308998e+02	4.603508e+01	2.094861e+02	7.914555e+02	6.098760e+02	3.268611e+02	4.427874e+02	2.399973e+02
3.870000e+02	3.156099e+03	1.419649e+03	8.671180e+02	8.575241e+02	7.794132e+02	-4.812292e+01	1.995360e+02	2.475173e+02	7.478276e+02	1.192902e+02	4.021631e+01	2.379265e+02	8.173106e+02	6.615393e+02	3.669490e+02	4.124639e+02	1.880801e+02
3.880000e+02	3.189015e+03	1.408448e+03	8.567594e+02	8.727509e+02	7.797586e+02	-5.539221e+01	2.147732e+02	2.448745e+02	7.386457e+02	1.181136e+02	5.046464e+01	2.608690e+02	8.222892e+02	6.841090e+02	3.882789e+02	3.914798e+02	1.569465e+02
3.890000e+02	3.217111e+03	1.408115e+03	8.402023e+02	8.811451e+02	7.748490e+02	-3.274682e+01	2.344466e+02	2.398236e+02	7.151063e+02	1.250960e+02	7.587939e+01	2.807691e+02	8.052686e+02	6.773124e+02	3.922895e+02	3.825598e+02	1.530526e+02
3.900000e+02	3.237648e+03	1.418630e+03	8.117507e+02	8.806534e+02	7.700334e+02	1.456351e+01	2.606533e+02	2.310211e+02	6.756069e+02	1.361441e+02	1.127887e+02	2.999263e+02	7.678676e+02	6.444628e+02	3.822339e+02	3.878000e+02	1.807371e+02
3.910000e+02	3.253692e+03	1.438808e+03	7.679275e+02	8.700414e+02	7.703158e+02	7.692724e+01	2.931406e+02	2.176272e+02	6.218005e+02	1.461275e+02	1.554200e+02	3.197432e+02	7.146242e+02	5.918430e+02	3.623409e+02	4.079753e+02	2.407936e+02
3.920000e+02	3.272848e+03	1.466329e+03	7.088023e+02	8.495318e+02	7.788227e+02	1.425142e+02	3.293467e+02	1.996082e+02	5.587214e+02	1.500816e+02	1.971339e+02	3.403394e+02	6.524005e+02	5.275075e+02	3.369140e+02	4.419090e+02	3.294762e+02
3.930000e+02	3.304111e+03	1.497714e+03	6.383399e+02	8.208925e+02	7.956949e+02	2.000562e+02	3.650497e+02	1.779374e+02	4.938310e+02	1.445099e+02	2.318831e+02	3.604911e+02	5.890117e+02	4.596594e+02	3.095031e+02	4.861919e+02	4.384033e+02
3.940000e+02	3.353812e+03	1.528222e+03	5.635905e+02	7.868390e+02	8.176952e+02	2.413190e+02	3.952768e+02	1.545551e+02	4.352697e+02	1.283219e+02	2.554060e+02	3.778043e+02	5.314350e+02	3.949597e+02	2.822791e+02	5.354159e+02	5.555411e+02
3.950000e+02	3.422219e+03	1.551759e+03	4.929317e+02	7.499436e+02	8.386345e+02	2.624181e+02	4.151291e+02	1.320257e+02	3.899164e+02	1.030166e+02	2.657414e+02	3.890379e+02	4.842039e+02	3.372373e+02	2.557268e+02	5.829073e+02	6.670832e+02
3.960000e+02	3.502281e+03	1.561096e+03	4.339456e+02	7.115314e+02	8.505581e+02	2.636341e+02	4.203696e+02	1.129684e+02	3.619322e+02	7.201478e+01	2.629383e+02	3.905539e+02	4.485944e+02	2.870170e+02	2.287493e+02	6.218080e+02	7.597645e+02
3.970000e+02	3.581287e+03	1.548748e+03	3.916836e+02	6.711231e+02	8.455125e+02	2.480321e+02	4.078257e+02	9.946020e+01	3.522652e+02	3.941989e+01	2.482057e+02	3.788990e+02	4.229184e+02	2.420482e+02	1.992123e+02	6.462993e+02	8.230587e+02
3.980000e+02	3.645022e+03	1.508661e+03	3.679274e+02	6.267840e+02	8.175738e+02	2.196718e+02	3.757551e+02	9.263516e+01	3.591808e+02	8.747993e+00	2.230035e+02	3.514908e+02	4.037813e+02	1.986721e+02	1.648300e+02	6.527428e+02	8.507857e+02
3.990000e+02	3.682770e+03	1.438396e+03	3.616309e+02	5.763216e+02	7.646676e+02	1.822613e+02	3.242475e+02	9.261065e+01	3.794583e+02	-1.782598e+01	1.885751e+02	3.073001e+02	3.877469e+02	1.535561e+02	1.241587e+02	6.405078e+02	8.418362e+02
4.000000e+02	3.691114e+03	1.340982e+03	3.702240e+02	5.188564e+02	6.896149e+02	1.387725e+02	2.555611e+02	9.871631e+01	4.096406e+02	-3.941520e+01	1.461529e+02	2.473470e+02	3.727034e+02	1.051876e+02	7.737184e+01	6.122419e+02	7.999141e+02
4.010000e+02	3.674990e+03	1.225509e+03	3.911268e+02	4.560883e+02	5.999460e+02	9.197473e+01	1.741712e+02	1.098653e+02	4.467891e+02	-5.566114e+01	9.767437e+01	1.748250e+02	3.584136e+02	5.462511e+01	2.653363e+01	5.734110e+02	7.323942e+02
4.020000e+02	3.645751e+03	1.105886e+03	4.228189e+02	3.927015e+02	5.063919e+02	4.536911e+01	8.633913e+01	1.248744e+02	4.885242e+02	-6.570431e+01	4.653826e+01	9.475511e+01	3.461625e+02	5.311128e+00	-2.473601e+01	5.311264e+02	6.485866e+02
4.030000e+02	3.617281e+03	9.979768e+02	4.651099e+02	3.357119e+02	4.204692e+02	3.821274e+00	-8.109108e-01	1.426132e+02	5.325636e+02	-6.745293e+01	-2.132226e+00	1.321349e+01	3.378432e+02	-3.789654e+01	-7.208688e+01	4.925543e+02	5.578500e+02
4.040000e+02	3.601899e+03	9.160572e+02	5.186567e+02	2.929779e+02	3.519599e+02	-2.662573e+01	-8.050337e+01	1.619858e+02	5.762452e+02	-5.758817e+01	-4.203856e+01	-6.369435e+01	3.350154e+02	-7.007639e+01	-1.114676e+02	4.634254e+02	4.680548e+02
4.050000e+02	3.607480e+03	8.698234e+02	5.840632e+02	2.713476e+02	3.071189e+02	-3.985447e+01	-1.474739e+02	1.818418e+02	6.164815e+02	-3.241846e+01	-6.700501e+01	-1.308747e+02	3.383516e+02	-8.753083e+01	-1.400395e+02	4.471560e+02	3.847786e+02
4.060000e+02	3.636328e+03	8.628251e+02	6.609450e+02	2.749607e+02	2.880721e+02	-3.133094e+01	-1.987611e+02	2.009207e+02	6.502576e+02	1.068670e+01	-7.260127e+01	-1.850638e+02	3.475611e+02	-8.868201e+01	-1.567449e+02	4.448146e+02	3.113423e+02
4.070000e+02	3.685429e+03	8.925070e+02	7.472091e+02	3.040967e+02	2.933161e+02	3.226680e-01	-2.339350e+02	2.178771e+02	6.753793e+02	7.182857e+01	-5.749201e+01	-2.252347e+02	3.615880e+02	-7.442498e+01	-1.624303e+02	4.557441e+02	2.494619e+02
4.080000e+02	3.747307e+03	9.513878e+02	8.386441e+02	3.548018e+02	3.187929e+02	5.246770e+01	-2.547377e+02	2.313579e+02	6.909718e+02	1.476705e+02	-2.400318e+01	-2.524831e+02	3.788046e+02	-4.792826e+01	-1.595358e+02	4.783267e+02	2.000543e+02
4.090000e+02	3.810972e+03	1.028677e+03	9.288644e+02	4.193919e+02	3.589381e+02	1.186473e+02	-2.642636e+02	2.400798e+02	6.973787e+02	2.314834e+02	2.230674e+01	-2.693908e+02	3.970850e+02	-1.394955e+01	-1.514280e+02	5.103648e+02	1.637211e+02
4.100000e+02	3.863049e+03	1.111846e+03	1.009705e+03	4.878076e+02	4.073751e+02	1.897842e+02	-2.659079e+02	2.428809e+02	6.955157e+02	3.141863e+02	7.391842e+01	-2.790138e+02	4.138891e+02	2.221081e+01	-1.415061e+02	5.488808e+02	1.406629e+02
4.110000e+02	3.889586e+03	1.188102e+03	1.072192e+03	5.496385e+02	4.573381e+02	2.559807e+02	-2.623718e+02	2.387680e+02	6.861168e+02	3.860728e+02	1.230433e+02	-2.837835e+02	4.265951e+02	5.592079e+01	-1.322798e+02	5.896184e+02	1.301344e+02
4.120000e+02	3.878863e+03	1.245961e+03	1.108130e+03	5.964206e+02	5.021707e+02	3.083925e+02	-2.550086e+02	2.270107e+02	6.694018e+02	4.387253e+02	1.632346e+02	-2.846963e+02	4.331860e+02	8.430597e+01	-1.246758e+02	6.268478e+02	1.298484e+02
4.130000e+02	3.824878e+03	1.277026e+03	1.112045e+03	6.236291e+02	5.361768e+02	3.407345e+02	-2.437223e+02	2.073041e+02	6.454168e+02	4.666256e+02	1.905253e+02	-2.811099e+02	4.331036e+02	1.068929e+02	-1.178313e+02	6.540099e+02	1.358121e+02
4.140000e+02	3.730383e+03	1.277722e+03	1.082982e+03	6.317462e+02	5.557553e+02	3.501889e+02	-2.274575e+02	1.799776e+02	6.148457e+02	4.681342e+02	2.039074e+02	-2.712570e+02	4.278384e+02	1.255638e+02	-1.095123e+02	6.652694e+02	1.428667e+02
4.150000e+02	3.608063e+03	1.250346e+03	1.025460e+03	6.259819e+02	5.603680e+02	3.376804e+02	-2.051063e+02	1.461849e+02	5.797496e+02	4.457092e+02	2.051573e+02	-2.532930e+02	4.208240e+02	1.437876e+02	-9.707793e+01	6.574473e+02	1.458293e+02
4.160000e+02	3.478848e+03	1.202815e+03	9.490849e+02	6.146247e+02	5.527529e+02	3.075895e+02	-1.764650e+02	1.080014e+02	5.436942e+02	4.053899e+02	1.981351e+02	-2.264591e+02	4.164890e+02	1.653508e+02	-7.866518e+01	6.314185e+02	1.407900e+02
4.170000e+02	3.367506e+03	1.146833e+03	8.667170e+02	6.064670e+02	5.380259e+02	2.669884e+02	-1.428211e+02	6.837876e+01	5.110470e+02	3.556697e+02	1.877339e+02	-1.918720e+02	4.187325e+02	1.929988e+02	-5.414055e+01	5.921656e+02	1.260092e+02
4.180000e+02	3.296813e+03	1.094840e+03	7.916248e+02	6.080850e+02	5.218141e+02	2.244812e+02	-1.068830e+02	3.093017e+01	4.856785e+02	3.059462e+02	1.786805e+02	-1.526104e+02	4.294039e+02	2.274145e+02	-2.541885e+01	5.472306e+02	1.020467e+02
4.190000e+02	3.282259e+03	1.056639e+03	7.344168e+02	6.218088e+02	5.080595e+02	1.887518e+02	-7.205232e+01	-4.565374e-01	4.696125e+02	2.648043e+02	1.744138e+02	-1.130652e+02	4.473945e+02	2.668116e+02	3.999195e+00	5.040565e+02	7.113481e+01
4.200000e+02	3.328995e+03	1.036743e+03	7.006357e+02	6.449723e+02	4.973591e+02	1.669968e+02	-4.134388e+01	-2.215137e+01	4.621982e+02	2.384375e+02	1.762819e+02	-7.781529e+01	4.686899e+02	3.071879e+02	3.009574e+01	4.672581e+02	3.617410e+01
4.210000e+02	3.431691e+03	1.033276e+03	6.896797e+02	6.706103e+02	4.865548e+02	1.635170e+02	-1.642813e+01	-3.138291e+01	4.601456e+02	2.295340e+02	1.832710e+02	-5.045245e+01	4.873390e+02	3.431045e+02	4.958788e+01	4.369605e+02	-1.220136e-01
4.220000e+02	3.576802e+03	1.038789e+03	6.953370e+02	6.893525e+02	4.698356e+02	1.788054e+02	2.783077e+00	-2.675943e+01	4.584297e+02	2.369071e+02	1.923785e+02	-3.274382e+01	4.969737e+02	3.687858e+02	6.088397e+01	4.089445e+02	-3.554873e+01
4.230000e+02	3.745956e+03	1.042792e+03	7.078127e+02	6.919827e+02	4.410496e+02	2.094504e+02	1.783897e+01	-8.518509e+00	4.517864e+02	2.560262e+02	1.995758e+02	-2.434819e+01	4.924067e+02	3.793625e+02	6.441425e+01	3.766277e+02	-6.816077e+01
4.240000e+02	3.919215e+03	1.035346e+03	7.167891e+02	6.720398e+02	3.964620e+02	2.490127e+02	3.087923e+01	2.164931e+01	4.363798e+02	2.804094e+02	2.011165e+02	-2.309956e+01	4.709231e+02	3.720936e+02	6.227563e+01	3.341787e+02	-9.576467e+01
4.250000e+02	4.077536e+03	1.010717e+03	7.147943e+02	6.278524e+02	3.369798e+02	2.897442e+02	4.354613e+01	6.121325e+01	4.112052e+02	3.035894e+02	1.948003e+02	-2.572813e+01	4.330519e+02	3.473537e+02	5.739135e+01	2.795809e+02	-1.156178e+02
4.260000e+02	4.204489e+03	9.699297e+02	6.999794e+02	5.634986e+02	2.689660e+02	3.246816e+02	5.608506e+01	1.076548e+02	3.788478e+02	3.211324e+02	1.807729e+02	-2.882551e+01	3.827257e+02	3.090719e+02	5.253627e+01	2.164227e+02	-1.246742e+02
4.270000e+02	4.287613e+03	9.212274e+02	6.773848e+02	4.883466e+02	2.031827e+02	3.494317e+02	6.694743e+01	1.591994e+02	3.453220e+02	3.320640e+02	1.615627e+02	-2.983834e+01	3.267842e+02	2.642891e+02	4.958042e+01	1.535959e+02	-1.203899e+02
4.280000e+02	4.319649e+03	8.779843e+02	6.580423e+02	4.151322e+02	1.520333e+02	3.630224e+02	7.305105e+01	2.150571e+02	3.188887e+02	3.391553e+02	1.413184e+02	-2.785244e+01	2.738145e+02	2.216858e+02	4.918486e+01	1.028426e+02	-1.017622e+02
4.290000e+02	4.299394e+03	8.545244e+02	6.558745e+02	3.569545e+02	1.259245e+02	3.675398e+02	7.067808e+01	2.749966e+02	3.080140e+02	3.478625e+02	1.245154e+02	-2.392248e+01	2.324404e+02	1.893193e+02	5.100170e+01	7.491741e+01	-7.011198e+01
4.300000e+02	4.231703e+03	8.611956e+02	6.831731e+02	3.239984e+02	1.299872e+02	3.667714e+02	5.680932e+01	3.384045e+02	3.189672e+02	3.642081e+02	1.146091e+02	-2.076893e+01	2.093911e+02	1.722435e+02	5.424713e+01	7.573502e+01	-2.921171e+01
4.310000e+02	4.126293e+03	9.005265e+02	7.461343e+02	3.209993e+02	1.623570e+02	3.644594e+02	3.051309e+01	4.032844e+02	3.538062e+02	3.923304e+02	1.131144e+02	-2.184907e+01	2.078871e+02	1.709117e+02	5.838513e+01	1.039668e+02	1.535124e+01
4.320000e+02	3.995547e+03	9.660023e+02	8.420928e+02	3.462747e+02	2.146836e+02	3.628577e+02	-6.110759e+00	4.657493e+02	4.095050e+02	4.325900e+02	1.193695e+02	-3.006689e+01	2.269079e+02	1.810835e+02	6.362238e+01	1.510562e+02	5.736266e+01
4.330000e+02	3.852026e+03	1.043970e+03	9.595468e+02	3.925887e+02	2.746999e+02	3.620500e+02	-4.788319e+01	5.203654e+02	4.786226e+02	4.809262e+02	1.309313e+02	-4.659042e+01	2.616604e+02	1.953943e+02	7.099359e+01	2.037011e+02	9.130581e+01
4.340000e+02	3.706548e+03	1.117895e+03	1.080988e+03	4.494300e+02	3.298971e+02	3.601103e+02	-8.757291e+01	5.612993e+02	5.513137e+02	5.296766e+02	1.443123e+02	-7.025685e+01	3.051205e+02	2.060423e+02	8.199363e+01	2.478981e+02	1.134007e+02
4.350000e+02	3.567404e+03	1.173262e+03	1.187454e+03	5.058172e+02	3.709966e+02	3.538751e+02	-1.177463e+02	5.838130e+02	6.179123e+02	5.695429e+02	1.557360e+02	-9.782128e+01	3.500835e+02	2.075669e+02	9.792133e+01	2.730700e+02	1.220999e+02
4.360000e+02	3.440687e+03	1.201320e+03	1.263128e+03	5.527053e+02	3.941192e+02	3.399850e+02	-1.328021e+02	5.854810e+02	6.711004e+02	5.920292e+02	1.617292e+02	-1.249399e+02	3.909779e+02	1.986778e+02	1.192415e+02	2.748727e+02	1.180149e+02
4.370000e+02	3.331230e+03	1.200596e+03	1.298533e+03	5.844059e+02	4.011814e+02	3.159117e+02	-1.304303e+02	5.666673e+02	7.069272e+02	5.916069e+02	1.595608e+02	-1.474582e+02	4.248463e+02	1.825493e+02	1.452641e+02	2.559128e+02	1.034411e+02
4.380000e+02	3.243420e+03	1.176131e+03	1.291586e+03	5.989173e+02	3.987548e+02	2.808032e+02	-1.119676e+02	5.301995e+02	7.245407e+02	5.670464e+02	1.476247e+02	-1.624682e+02	4.512930e+02	1.656533e+02	1.742745e+02	2.244764e+02	8.174132e+01
4.390000e+02	3.181383e+03	1.137292e+03	1.246730e+03	5.974084e+02	3.960564e+02	2.360331e+02	-8.160274e+01	4.805648e+02	7.250754e+02	5.216558e+02	1.258012e+02	-1.687565e+02	4.716069e+02	1.557300e+02	2.040187e+02	1.920347e+02	5.681509e+01
4.400000e+02	3.148360e+03	1.095189e+03	1.172893e+03	5.832056e+02	4.027795e+02	1.853367e+02	-4.485724e+01	4.230967e+02	7.104215e+02	4.624730e+02	9.568572e+01	-1.665913e+02	4.875188e+02	1.596632e+02	2.322776e+02	1.704997e+02	3.276503e+01
4.410000e+02	3.145543e+03	1.060486e+03	1.081148e+03	5.605830e+02	4.272299e+02	1.344057e+02	-6.995885e+00	3.634601e+02	6.824756e+02	3.986743e+02	6.049306e+01	-1.571064e+02	5.000884e+02	1.818528e+02	2.572713e+02	1.699573e+02	1.371904e+01
4.420000e+02	3.170882e+03	1.041872e+03	9.826855e+02	5.336006e+02	4.749365e+02	8.989411e+01	2.808362e+01	3.074135e+02	6.430881e+02	3.395999e+02	2.450608e+01	-1.416738e+02	5.090926e+02	2.233530e+02	2.777880e+02	1.971479e+02	3.656675e+00
4.430000e+02	3.218402e+03	1.045094e+03	8.873659e+02	5.052553e+02	5.477285e+02	5.797186e+01	5.825682e+01	2.605564e+02	5.945247e+02	2.928439e+02	-7.848008e+00	-1.215571e+02	5.131012e+02	2.817670e+02	2.931275e+02	2.546008e+02	6.063783e+00
4.440000e+02	3.278412e+03	1.072380e+03	8.028642e+02	4.772180e+02	6.432481e+02	4.279049e+01	8.298545e+01	2.277523e+02	5.400291e+02	2.628379e+02	-3.298974e+01	-9.789711e+01	5.102055e+02	3.517678e+02	3.030315e+02	3.402166e+02	2.332570e+01
4.450000e+02	3.338695e+03	1.122158e+03	7.343074e+02	4.502921e+02	7.549284e+02	4.536232e+01	1.028192e+02	2.121580e+02	4.840681e+02	2.502422e+02	-4.885648e+01	-7.186082e+01	4.991463e+02	4.260833e+02	3.076977e+02	4.472306e+02	5.593256e+01
4.460000e+02	3.386465e+03	1.189102e+03	6.842618e+02	4.254044e+02	8.724978e+02	6.329239e+01	1.188390e+02	2.141417e+02	4.319985e+02	2.522660e+02	-5.499048e+01	-4.471902e+01	4.803927e+02	4.967783e+02	3.078113e+02	5.646861e+02	1.017428e+02
4.470000e+02	3.410660e+03	1.264577e+03	6.529297e+02	4.045934e+02	9.830606e+02	9.151980e+01	1.321622e+02	2.306099e+02	3.891450e+02	2.637872e+02	-5.207925e+01	-1.772962e+01	4.566705e+02	5.566098e+02	3.044283e+02	6.786314e+02	1.556486e+02
4.480000e+02	3.404011e+03	1.337529e+03	6.384416e+02	3.913493e+02	1.072723e+03	1.238323e+02	1.435302e+02	2.552060e+02	3.595286e+02	2.789151e+02	-4.125557e+01	8.110796e+00	4.326028e+02	6.001879e+02	2.986116e+02	7.741095e+02	2.099523e+02
4.490000e+02	3.364384e+03	1.395846e+03	6.371970e+02	3.899628e+02	1.128629e+03	1.546058e+02	1.530048e+02	2.795012e+02	3.446766e+02	2.925221e+02	-2.354339e+01	3.226430e+01	4.135041e+02	6.246842e+02	2.909200e+02	8.377072e+02	2.555755e+02
4.500000e+02	3.295077e+03	1.428185e+03	6.443206e+02	4.041323e+02	1.141154e+03	1.801539e+02	1.598657e+02	2.948335e+02	3.429966e+02	3.013254e+02	3.320855e-01	5.464267e+01	4.037981e+02	6.299511e+02	2.810363e+02	8.601149e+02	2.839419e+02
4.510000e+02	3.204066e+03	1.426156e+03	6.543717e+02	4.356192e+02	1.105850e+03	1.992914e+02	1.628220e+02	2.941350e+02	3.500660e+02	3.043068e+02	2.984440e+01	7.537992e+01	4.057726e+02	6.181038e+02	2.678368e+02	8.380098e+02	2.890719e+02
4.520000e+02	3.102475e+03	1.386541e+03	6.624071e+02	4.838305e+02	1.024694e+03	2.130811e+02	1.605536e+02	2.730999e+02	3.598887e+02	3.025194e+02	6.455022e+01	9.452075e+01	4.192780e+02	5.927861e+02	2.499915e+02	7.746989e+02	2.692485e+02
4.530000e+02	3.002798e+03	1.312962e+03	6.653077e+02	5.467219e+02	9.061845e+02	2.240436e+02	1.524099e+02	2.303964e+02	3.668064e+02	2.985023e+02	1.041858e+02	1.118079e+02	4.425338e+02	5.584005e+02	2.268685e+02	6.793128e+02	2.276477e+02
4.540000e+02	2.917300e+03	1.216282e+03	6.630056e+02	6.225894e+02	7.640595e+02	2.351987e+02	1.389430e+02	1.670985e+02	3.674679e+02	2.955388e+02	1.489410e+02	1.266794e+02	4.736460e+02	5.195104e+02	1.992832e+02	5.647733e+02	1.716177e+02
4.550000e+02	2.856776e+03	1.113152e+03	6.590480e+02	7.116538e+02	6.147698e+02	2.491914e+02	1.219737e+02	8.585679e+01	3.621736e+02	2.968757e+02	1.996039e+02	1.384595e+02	5.120476e+02	4.804551e+02	1.696583e+02	4.451090e+02	1.107639e+02
4.560000e+02	2.829486e+03	1.022656e+03	6.599840e+02	8.162760e+02	4.742755e+02	2.675762e+02	1.041051e+02	-9.658740e+00	3.550720e+02	3.049136e+02	2.572131e+02	1.466300e+02	5.590608e+02	4.450774e+02	1.414430e+02	3.328305e+02	5.445129e+01
4.570000e+02	2.839953e+03	9.617453e+02	6.734206e+02	9.392754e+02	3.550145e+02	2.902598e+02	8.789273e+01	-1.147964e+02	3.530302e+02	3.203922e+02	3.221152e+02	1.510552e+02	6.171583e+02	4.164151e+02	1.180258e+02	2.369873e+02	9.576023e+00
4.580000e+02	2.887586e+03	9.407280e+02	7.051717e+02	1.080852e+03	2.638988e+02	3.151802e+02	7.507366e+01	-2.236028e+02	3.634334e+02	3.417403e+02	3.927441e+02	1.520749e+02	6.881068e+02	3.962894e+02	1.016346e+02	1.622631e+02	-2.065953e+01
4.590000e+02	2.965624e+03	9.603136e+02	7.564610e+02	1.235494e+03	2.018620e+02	3.384158e+02	6.620957e+01	-3.285896e+02	3.915484e+02	3.649147e+02	4.647657e+02	1.504414e+02	7.707279e+02	3.848726e+02	9.270931e+01	1.091516e+02	-3.665421e+01
4.600000e+02	3.061319e+03	1.011269e+03	8.223318e+02	1.390483e+03	1.649548e+02	3.549116e+02	6.084743e+01	-4.210366e+02	4.383008e+02	3.840331e+02	5.312044e+02	1.471135e+02	8.592791e+02	3.804455e+02	8.996991e+01	7.498385e+01	-4.121510e+01
4.610000e+02	3.158173e+03	1.076930e+03	8.921068e+02	1.527075e+03	1.464925e+02	3.597995e+02	5.801076e+01	-4.920126e+02	4.992580e+02	3.928510e+02	5.837672e+02	1.429552e+02	9.433089e+02	3.795773e+02	9.106330e+01	5.542816e+01	-3.787618e+01
4.620000e+02	3.240195e+03	1.137829e+03	9.519855e+02	1.624326e+03	1.394945e+02	3.499678e+02	5.669585e+01	-5.339132e+02	5.652698e+02	3.867178e+02	6.150069e+02	1.384284e+02	1.009322e+03	3.778514e+02	9.344694e+01	4.604642e+01	-2.943500e+01
4.630000e+02	3.297017e+03	1.177002e+03	9.889858e+02	1.664415e+03	1.386939e+02	3.253068e+02	5.613632e+01	-5.420165e+02	6.246654e+02	3.643222e+02	6.205202e+02	1.334153e+02	1.043898e+03	3.710479e+02	9.515285e+01	4.353990e+01	-1.720177e+01
4.640000e+02	3.327923e+03	1.184333e+03	9.948324e+02	1.637641e+03	1.416529e+02	2.891007e+02	5.582610e+01	-5.155068e+02	6.663312e+02	3.285028e+02	6.003294e+02	1.273051e+02	1.037316e+03	3.564645e+02	9.522941e+01	4.642234e+01	-1.075715e+00
4.650000e+02	3.342914e+03	1.158681e+03	9.683644e+02	1.545372e+03	1.488463e+02	2.473585e+02	5.547304e+01	-4.576137e+02	6.826383e+02	2.857273e+02	5.589337e+02	1.193986e+02	9.864439e+02	3.339208e+02	9.384313e+01	5.500207e+01	1.979090e+01
4.660000e+02	3.360092e+03	1.107279e+03	9.155990e+02	1.399965e+03	1.628603e+02	2.073160e+02	5.505900e+01	-3.748562e+02	6.712215e+02	2.443784e+02	5.040764e+02	1.095153e+02	8.958948e+02	3.060332e+02	9.212267e+01	7.073668e+01	4.615953e+01
4.670000e+02	3.400135e+03	1.042812e+03	8.475000e+02	1.221729e+03	1.870370e+02	1.756522e+02	5.501545e+01	-2.757008e+02	6.350445e+02	2.124560e+02	4.447366e+02	9.853370e+01	7.769984e+02	2.775828e+02	9.182039e+01	9.521594e+01	7.808406e+01
4.680000e+02	3.479927e+03	9.792160e+02	7.763456e+02	1.033989e+03	2.239822e+02	1.570036e+02	5.632967e+01	-1.690986e+02	5.808551e+02	1.954906e+02	3.890425e+02	8.855006e+01	6.449522e+02	2.541538e+02	9.481774e+01	1.291640e+02	1.146899e+02
4.690000e+02	3.607654e+03	9.275857e+02	7.120352e+02	8.578225e+02	2.743541e+02	1.531370e+02	6.033831e+01	-6.332724e+01	5.167399e+02	1.952952e+02	3.426903e+02	8.246449e+01	5.151372e+02	2.405283e+02	1.024975e+02	1.718564e+02	1.543165e+02
4.700000e+02	3.780967e+03	8.933810e+02	6.595833e+02	7.080063e+02	3.362634e+02	1.628381e+02	6.811055e+01	3.463126e+01	4.497778e+02	2.098052e+02	3.081710e+02	8.305783e+01	3.998395e+02	2.394353e+02	1.150785e+02	2.211852e+02	1.948391e+02
4.710000e+02	3.988443e+03	8.756515e+02	6.185096e+02	5.912029e+02	4.054461e+02	1.823493e+02	7.959472e+01	1.191814e+02	3.846441e+02	2.338651e+02	2.848336e+02	9.187715e+01	3.063726e+02	2.510924e+02	1.311111e+02	2.743355e+02	2.339698e+02
4.720000e+02	4.213251e+03	8.683106e+02	5.841077e+02	5.066013e+02	4.761498e+02	2.061393e+02	9.293030e+01	1.858773e+02	3.235186e+02	2.605888e+02	2.696225e+02	1.083723e+02	2.369811e+02	2.736197e+02	1.473802e+02	3.287707e+02	2.694347e+02
4.730000e+02	4.437268e+03	8.628702e+02	5.499336e+02	4.484372e+02	5.424718e+02	2.278496e+02	1.043582e+02	2.311489e+02	2.670604e+02	2.828729e+02	2.582393e+02	1.296528e+02	1.901993e+02	3.040285e+02	1.593818e+02	3.830915e+02	2.990546e+02
4.740000e+02	4.644119e+03	8.516510e+02	5.105272e+02	4.092696e+02	5.997456e+02	2.413361e+02	1.089548e+02	2.522590e+02	2.157890e+02	2.947381e+02	2.464323e+02	1.510009e+02	1.628380e+02	3.392656e+02	1.623569e+02	4.373909e+02	3.208475e+02
4.750000e+02	4.820519e+03	8.304223e+02	4.634327e+02	3.827925e+02	6.455611e+02	2.417226e+02	1.020600e+02	2.476312e+02	1.711345e+02	2.922981e+02	2.311058e+02	1.669898e+02	1.516867e+02	3.768347e+02	1.526354e+02	4.929288e+02	3.332631e+02
4.760000e+02	4.956352e+03	7.996901e+02	4.099551e+02	3.652999e+02	6.800986e+02	2.263185e+02	8.094397e+01	2.175016e+02	1.356857e+02	2.742695e+02	2.109831e+02	1.728447e+02	1.543163e+02	4.147692e+02	1.288946e+02	5.512080e+02	3.355655e+02
4.770000e+02	5.044522e+03	7.643425e+02	3.545876e+02	3.555741e+02	7.056661e+02	1.951997e+02	4.611605e+01	1.646410e+02	1.125839e+02	2.420039e+02	1.866834e+02	1.656254e+02	1.688896e+02	4.510700e+02	9.291976e+01	6.127514e+02	3.282497e+02
4.780000e+02	5.081409e+03	7.318995e+02	3.034687e+02	3.536253e+02	7.255809e+02	1.512727e+02	1.786468e+00	9.475600e+01	1.043929e+02	1.990761e+02	1.602666e+02	1.449103e+02	1.933573e+02	4.829873e+02	4.958938e+01	6.759976e+02	3.132832e+02
4.790000e+02	5.068015e+03	7.100317e+02	2.624541e+02	3.591345e+02	7.427689e+02	9.977110e+01	-4.470066e+01	1.618411e+01	1.119400e+02	1.505146e+02	1.344912e+02	1.128620e+02	2.246417e+02	5.066072e+02	6.042148e+00	7.367335e+02	2.939745e+02
4.800000e+02	5.011060e+03	7.041890e+02	2.353969e+02	3.704524e+02	7.585786e+02	4.731540e+01	-8.428250e+01	-6.129046e+01	1.335710e+02	1.018267e+02	1.121234e+02	7.376247e+01	2.583273e+02	5.170717e+02	-2.977208e+01	7.883578e+02	2.743858e+02
4.810000e+02	4.922991e+03	7.160883e+02	2.230997e+02	3.846484e+02	7.722439e+02	8.101748e-01	-1.079809e+02	-1.283106e+02	1.650666e+02	5.803393e+01	9.556761e+01	3.323571e+01	2.890792e+02	5.094714e+02	-5.075814e+01	8.230092e+02	2.583938e+02
4.820000e+02	4.820338e+03	7.434675e+02	2.231978e+02	3.985489e+02	7.811731e+02	-3.351897e+01	-1.085460e+02	-1.779598e+02	2.002544e+02	2.294441e+01	8.689027e+01	-2.611108e+00	3.116571e+02	4.801114e+02	-5.208364e+01	8.332634e+02	2.486657e+02
4.830000e+02	4.720757e+03	7.810460e+02	2.309808e+02	4.102167e+02	7.818844e+02	-5.077111e+01	-8.151802e+01	-2.072126e+02	2.321720e+02	-1.190231e+00	8.806568e+01	-2.797881e+01	3.221496e+02	4.276382e+02	-3.193830e+01	8.138286e+02	2.458775e+02
4.840000e+02	4.639882e+03	8.221853e+02	2.408781e+02	4.201041e+02	7.711225e+02	-4.772275e+01	-2.557640e+01	-2.172890e+02	2.545197e+02	-1.364057e+01	1.011213e+02	-3.806500e+01	3.189815e+02	3.535391e+02	8.504561e+00	7.626230e+02	2.484189e+02
4.850000e+02	4.589170e+03	8.605156e+02	2.480966e+02	4.312280e+02	7.466436e+02	-2.307217e+01	5.763959e+01	-2.128153e+02	2.630572e+02	-1.495977e+01	1.278812e+02	-2.968560e+01	3.033456e+02	2.618272e+02	6.575078e+01	6.808971e+02	2.526613e+02
4.860000e+02	4.575273e+03	8.909115e+02	2.498147e+02	4.481435e+02	7.074010e+02	2.224446e+01	1.638639e+02	-2.001687e+02	2.565806e+02	-6.765291e+00	1.692206e+02	-1.841334e+00	2.789216e+02	1.581471e+02	1.348530e+02	5.725517e+02	2.536898e+02
4.870000e+02	4.600419e+03	9.096417e+02	2.455231e+02	4.750384e+02	6.532753e+02	8.467488e+01	2.863868e+02	-1.856517e+02	2.371845e+02	8.338963e+00	2.240605e+02	4.386258e+01	2.509768e+02	4.884532e+01	2.100498e+02	4.432292e+02	2.463104e+02
4.880000e+02	4.662791e+03	9.140542e+02	2.365026e+02	5.137336e+02	5.848141e+02	1.578826e+02	4.160843e+02	-1.740858e+02	2.097062e+02	2.679653e+01	2.885968e+02	1.031444e+02	2.251358e+02	-5.947397e+01	2.849973e+02	2.998210e+02	2.261458e+02
4.890000e+02	4.756151e+03	9.024501e+02	2.248501e+02	5.625021e+02	5.034423e+02	2.331976e+02	5.416369e+02	-1.681158e+02	1.805007e+02	4.434926e+01	3.563086e+02	1.695359e+02	2.061927e+02	-1.597631e+02	3.527878e+02	1.506595e+02	1.906695e+02
4.900000e+02	4.868973e+03	8.746228e+02	2.126519e+02	6.163335e+02	4.122333e+02	3.009513e+02	6.504035e+02	-1.681796e+02	1.559215e+02	5.672997e+01	4.190441e+02	2.355023e+02	1.972890e+02	-2.440811e+02	4.061816e+02	6.057881e+00	1.400226e+02
4.910000e+02	4.984279e+03	8.329599e+02	2.017401e+02	6.686456e+02	3.168101e+02	3.525534e+02	7.301770e+02	-1.729104e+02	1.409754e+02	6.076435e+01	4.690159e+02	2.939958e+02	1.996297e+02	-3.035583e+02	4.383874e+02	-1.215699e+02	7.741562e+01
4.920000e+02	5.081501e+03	7.834171e+02	1.940624e+02	7.137916e+02	2.256263e+02	3.827082e+02	7.715463e+02	-1.797339e+02	1.385384e+02	5.552368e+01	5.010636e+02	3.399964e+02	2.127284e+02	-3.293340e+02	4.443612e+02	-2.187265e+02	8.898678e+00
4.930000e+02	5.140735e+03	7.355277e+02	1.923209e+02	7.493624e+02	1.490540e+02	3.909456e+02	7.701596e+02	-1.855082e+02	1.493152e+02	4.300554e+01	5.143304e+02	3.715349e+02	2.350329e+02	-3.144944e+02	4.222188e+02	-2.731557e+02	-5.760458e+01
4.940000e+02	5.148315e+03	7.010789e+02	2.004255e+02	7.774196e+02	9.732004e+01	3.818348e+02	7.280981e+02	-1.871224e+02	1.724654e+02	2.796032e+01	5.126888e+02	3.898737e+02	2.647321e+02	-2.563959e+02	3.742226e+02	-2.768933e+02	-1.138570e+02
4.950000e+02	5.101558e+03	6.918666e+02	2.234704e+02	8.043107e+02	7.803567e+01	3.637793e+02	6.539024e+02	-1.819672e+02	2.066085e+02	1.686244e+01	5.037647e+02	3.988754e+02	3.005476e+02	-1.583680e+02	3.069843e+02	-2.289397e+02	-1.530418e+02
4.960000e+02	5.010579e+03	7.174897e+02	2.672079e+02	8.392832e+02	9.438648e+01	3.468711e+02	5.612816e+02	-1.681892e+02	2.507932e+02	1.641558e+01	4.969650e+02	4.038883e+02	3.423200e+02	-2.990723e+01	2.308246e+02	-1.364302e+02	-1.711251e+02
4.970000e+02	4.896178e+03	7.840374e+02	3.371485e+02	8.924319e+02	1.447517e+02	3.405960e+02	4.668943e+02	-1.447108e+02	3.050117e+02	3.213801e+01	5.012416e+02	4.105747e+02	3.911921e+02	1.149654e+02	1.584345e+02	-1.367614e+01	-1.674334e+02
4.980000e+02	4.784439e+03	8.938514e+02	4.374003e+02	9.724870e+02	2.237800e+02	3.520872e+02	3.876660e+02	-1.111164e+02	3.699773e+02	6.742450e+01	5.232730e+02	4.239723e+02	4.492157e+02	2.607672e+02	1.030013e+02	1.207836e+02	-1.443691e+02
4.990000e+02	4.699904e+03	1.045829e+03	5.693172e+02	1.084767e+03	3.242237e+02	3.852412e+02	3.380226e+02	-6.759704e+01	4.461567e+02	1.231622e+02	5.664253e+02	4.478545e+02	5.183434e+02	3.940571e+02	7.594153e+01	2.482855e+02	-1.065299e+02
5.000000e+02	4.659543e+03	1.235511e+03	7.301200e+02	1.229507e+03	4.385661e+02	4.406058e+02	3.273763e+02	-1.508211e+01	5.323963e+02	1.977256e+02	6.304852e+02	4.843058e+02	5.990228e+02	5.062378e+02	8.449387e+01	3.540739e+02	-5.965465e+01
5.010000e+02	4.669243e+03	1.454668e+03	9.119107e+02	1.400834e+03	5.597724e+02	5.157348e+02	3.582812e+02	4.449885e+01	6.247680e+02	2.871448e+02	7.119432e+02	5.334232e+02	6.888920e+02	5.947860e+02	1.296888e+02	4.300839e+02	-9.719312e+00
5.020000e+02	4.723526e+03	1.690812e+03	1.101713e+03	1.586792e+03	6.811311e+02	6.057338e+02	4.257445e+02	1.080693e+02	7.163144e+02	3.854011e+02	8.045860e+02	5.931478e+02	7.822060e+02	6.626012e+02	2.054091e+02	4.757211e+02	3.773823e+01
5.030000e+02	4.808231e+03	1.927565e+03	1.283065e+03	1.770716e+03	7.957046e+02	7.038822e+02	5.180480e+02	1.716415e+02	7.980943e+02	4.849733e+02	9.002664e+02	6.592917e+02	8.704494e+02	7.158027e+02	2.991363e+02	4.965666e+02	7.817757e+01
5.040000e+02	4.905193e+03	2.146550e+03	1.439129e+03	1.933949e+03	8.960957e+02	8.023372e+02	6.190379e+02	2.310039e+02	8.613681e+02	5.777634e+02	9.898156e+02	7.258227e+02	9.441327e+02	7.608053e+02	3.944611e+02	5.016323e+02	1.086235e+02
5.050000e+02	4.997604e+03	2.330640e+03	1.556495e+03	2.059281e+03	9.749981e+02	8.929450e+02	7.113560e+02	2.826247e+02	9.001577e+02	6.563395e+02	1.064080e+03	7.854088e+02	9.951997e+02	8.017115e+02	4.747473e+02	5.002482e+02	1.282056e+02
5.060000e+02	5.074615e+03	2.467516e+03	1.628258e+03	2.134111e+03	1.026524e+03	9.680995e+02	7.797774e+02	3.243360e+02	9.130874e+02	7.151733e+02	1.115000e+03	8.301863e+02	1.019109e+03	8.388829e+02	5.268480e+02	4.996729e+02	1.384448e+02
5.070000e+02	5.133931e+03	2.552018e+03	1.655011e+03	2.152295e+03	1.047829e+03	1.021509e+03	8.138526e+02	3.554239e+02	9.035940e+02	7.514195e+02	1.136577e+03	8.527053e+02	1.015716e+03	8.690669e+02	5.437600e+02	5.040656e+02	1.430086e+02
5.080000e+02	5.181549e+03	2.586208e+03	1.643184e+03	2.114123e+03	1.040310e+03	1.048721e+03	8.093593e+02	3.760594e+02	8.782763e+02	7.649101e+02	1.125537e+03	8.469947e+02	9.885837e+02	8.868296e+02	5.255450e+02	5.147614e+02	1.468048e+02
5.090000e+02	5.228563e+03	2.577035e+03	1.601418e+03	2.024669e+03	1.009719e+03	1.047340e+03	7.684455e+02	3.863829e+02	8.440396e+02	7.573812e+02	1.081577e+03	8.096300e+02	9.430899e+02	8.865850e+02	4.784836e+02	5.312311e+02	1.545696e+02
5.100000e+02	5.285883e+03	2.532633e+03	1.536642e+03	1.891472e+03	9.649225e+02	1.016986e+03	6.986125e+02	3.857738e+02	8.053197e+02	7.313245e+02	1.007211e+03	7.406007e+02	8.842588e+02	8.644080e+02	4.129481e+02	5.519700e+02	1.693736e+02
5.110000e+02	5.358588e+03	2.458958e+03	1.451737e+03	1.722717e+03	9.156046e+02	9.591589e+02	6.108253e+02	3.727558e+02	7.626922e+02	6.890478e+02	9.073497e+02	6.437319e+02	8.153656e+02	8.191067e+02	3.407115e+02	5.748884e+02	1.915717e+02
5.120000e+02	5.442021e+03	2.358316e+03	1.345935e+03	1.526764e+03	8.697165e+02	8.771521e+02	5.171395e+02	3.456524e+02	7.135245e+02	6.324126e+02	7.888143e+02	5.264798e+02	7.379495e+02	7.524993e+02	2.723975e+02	5.973143e+02	2.185991e+02
5.130000e+02	5.521440e+03	2.230508e+03	1.217687e+03	1.313081e+03	8.317125e+02	7.760765e+02	4.283589e+02	3.036965e+02	6.543414e+02	5.633484e+02	6.599365e+02	3.990882e+02	6.531445e+02	6.691948e+02	2.156286e+02	6.160795e+02	2.457202e+02
5.140000e+02	5.575925e+03	2.076067e+03	1.068565e+03	1.093783e+03	8.023390e+02	6.628948e+02	3.522987e+02	2.480502e+02	5.837540e+02	4.848130e+02	5.302179e+02	2.732682e+02	5.635665e+02	5.762157e+02	1.742148e+02	6.281203e+02	2.674936e+02
5.150000e+02	5.585604e+03	1.900118e+03	9.061782e+02	8.845964e+02	7.800503e+02	5.462465e+02	2.930847e+02	1.822287e+02	5.045692e+02	4.016106e+02	4.098839e+02	1.606482e+02	4.747147e+02	4.825606e+02	1.484470e+02	6.316000e+02	2.794638e+02
5.160000e+02	5.539718e+03	1.714957e+03	7.446594e+02	7.041489e+02	7.633016e+02	4.358289e+02	2.515272e+02	1.117227e+02	4.241428e+02	3.205176e+02	3.090916e+02	7.121504e+01	3.950604e+02	3.985137e+02	1.362142e+02	6.270847e+02	2.795220e+02
5.170000e+02	5.442300e+03	1.539904e+03	6.023490e+02	5.712528e+02	7.524674e+02	3.412383e+02	2.261386e+02	4.298874e+01	3.528688e+02	2.494805e+02	2.366613e+02	1.189662e+01	3.345951e+02	3.344332e+02	1.343794e+02	6.180860e+02	2.685083e+02
5.180000e+02	5.312862e+03	1.398030e+03	4.975502e+02	5.007538e+02	7.503008e+02	2.704119e+02	2.141307e+02	-1.777190e+01	3.014856e+02	1.960642e+02	1.984654e+02	-1.456329e+01	3.022924e+02	2.989945e+02	1.397819e+02	6.105172e+02	2.499044e+02
5.190000e+02	5.181445e+03	1.310693e+03	4.438970e+02	4.993265e+02	7.606590e+02	2.280675e+02	2.119230e+02	-6.563228e+01	2.782427e+02	1.656531e+02	1.959124e+02	-1.019710e+01	3.034182e+02	2.972814e+02	1.495077e+02	6.111499e+02	2.287811e+02
5.200000e+02	5.079781e+03	1.291838e+03	4.468550e+02	5.628561e+02	7.862510e+02	2.146684e+02	2.152170e+02	-9.754766e+01	2.868504e+02	1.600028e+02	2.251527e+02	1.845938e+01	3.377073e+02	3.294432e+02	1.605507e+02	6.256988e+02	2.104022e+02
5.210000e+02	5.032064e+03	1.344192e+03	5.022945e+02	6.766368e+02	8.267861e+02	2.263606e+02	2.191659e+02	-1.125908e+02	3.256833e+02	1.766087e+02	2.775346e+02	6.175733e+01	3.991056e+02	3.905917e+02	1.694137e+02	6.573711e+02	1.989501e+02
5.220000e+02	5.048954e+03	1.458800e+03	5.973118e+02	8.186299e+02	8.787149e+02	2.560302e+02	2.192065e+02	-1.119659e+02	3.882279e+02	2.090810e+02	3.414420e+02	1.093576e+02	4.771908e+02	4.721731e+02	1.722571e+02	7.064565e+02	1.967231e+02
5.230000e+02	5.126809e+03	1.617928e+03	7.128765e+02	9.648447e+02	9.368029e+02	2.952114e+02	2.126203e+02	-9.888127e+01	4.644421e+02	2.484312e+02	4.050735e+02	1.530915e+02	5.597732e+02	5.643953e+02	1.658400e+02	7.709621e+02	2.039249e+02
5.240000e+02	5.251757e+03	1.800005e+03	8.275699e+02	1.095025e+03	9.966404e+02	3.362249e+02	2.001724e+02	-7.820192e+01	5.426090e+02	2.849577e+02	4.592475e+02	1.892568e+02	6.357787e+02	6.587766e+02	1.489053e+02	8.477349e+02	2.189492e+02
5.250000e+02	5.406169e+03	1.984585e+03	9.216112e+02	1.196672e+03	1.056562e+03	3.738051e+02	1.867490e+02	-5.572750e+01	6.113138e+02	3.102945e+02	4.992043e+02	2.193359e+02	6.974681e+02	7.497899e+02	1.232386e+02	9.333237e+02	2.389565e+02
5.260000e+02	5.574466e+03	2.155609e+03	9.804152e+02	1.266125e+03	1.117763e+03	4.056650e+02	1.801740e+02	-3.705911e+01	6.612670e+02	3.191457e+02	5.247430e+02	2.486510e+02	7.413804e+02	8.350124e+02	9.365484e+01	1.024109e+03	2.605627e+02
5.270000e+02	5.746076e+03	2.302332e+03	9.970228e+02	1.306671e+03	1.182497e+03	4.318797e+02	1.882761e+02	-2.627901e+01	6.867458e+02	3.102750e+02	5.387474e+02	2.833686e+02	7.679214e+02	9.139366e+02	6.667151e+01	1.115828e+03	2.805450e+02
5.280000e+02	5.915099e+03	2.418531e+03	9.729097e+02	1.324928e+03	1.251453e+03	4.534781e+02	2.153263e+02	-2.490335e+01	6.864402e+02	2.864682e+02	5.448805e+02	3.271122e+02	7.800435e+02	9.862875e+02	4.831644e+01	1.203139e+03	2.965107e+02
5.290000e+02	6.077875e+03	2.501258e+03	9.169540e+02	1.327320e+03	1.321967e+03	4.709818e+02	2.595343e+02	-3.159209e+01	6.635097e+02	2.534434e+02	5.455994e+02	3.787703e+02	7.817163e+02	1.050920e+03	4.199586e+01	1.279975e+03	3.074327e+02
5.300000e+02	6.230348e+03	2.550255e+03	8.427364e+02	1.318251e+03	1.388305e+03	4.836630e+02	3.129869e+02	-4.285289e+01	6.247298e+02	2.180063e+02	5.414507e+02	4.326567e+02	7.767952e+02	1.106009e+03	4.733021e+01	1.340979e+03	3.138773e+02
5.310000e+02	6.366823e+03	2.568289e+03	7.647857e+02	1.300478e+03	1.443991e+03	4.899649e+02	3.643247e+02	-5.455955e+01	5.787709e+02	1.860148e+02	5.319395e+02	4.811265e+02	7.685326e+02	1.150475e+03	6.037460e+01	1.383620e+03	3.177349e+02
5.320000e+02	6.480593e+03	2.561768e+03	6.947220e+02	1.277031e+03	1.484936e+03	4.889764e+02	4.031276e+02	-6.372653e+01	5.339007e+02	1.608216e+02	5.174585e+02	5.185757e+02	7.595667e+02	1.185815e+03	7.497278e+01	1.409967e+03	3.213906e+02
5.330000e+02	6.565877e+03	2.540590e+03	6.383684e+02	1.253218e+03	1.511566e+03	4.823034e+02	4.241205e+02	-6.983050e+01	4.956521e+02	1.427166e+02	5.012091e+02	5.450118e+02	7.520030e+02	1.217186e+03	8.453374e+01	1.427035e+03	3.265058e+02
5.340000e+02	6.619834e+03	2.516495e+03	5.946899e+02	1.237290e+03	1.528602e+03	4.753978e+02	4.293519e+02	-7.512506e+01	4.651473e+02	1.295428e+02	4.900138e+02	5.674673e+02	7.472701e+02	1.252852e+03	8.349713e+01	1.445107e+03	3.327875e+02
5.350000e+02	6.643479e+03	2.500000e+03	5.569041e+02	1.239110e+03	1.542360e+03	4.775302e+02	4.274195e+02	-8.379322e+01	4.386820e+02	1.182221e+02	4.933985e+02	5.984045e+02	7.457049e+02	1.301822e+03	6.811167e+01	1.474248e+03	3.371838e+02
5.360000e+02	6.641015e+03	2.496770e+03	5.153961e+02	1.267202e+03	1.556685e+03	5.001025e+02	4.301286e+02	-1.002606e+02	4.088163e+02	1.065793e+02	5.210990e+02	6.515370e+02	7.460961e+02	1.370375e+03	3.660587e+01	1.520078e+03	3.338095e+02
5.370000e+02	6.617917e+03	2.504704e+03	4.614165e+02	1.325393e+03	1.569333e+03	5.536846e+02	4.480387e+02	-1.273558e+02	3.666886e+02	9.472688e+01	5.798623e+02	7.366134e+02	7.455243e+02	1.458676e+03	-1.091859e+01	1.580248e+03	3.146624e+02
5.380000e+02	6.578868e+03	2.512847e+03	3.902110e+02	1.410498e+03	1.570444e+03	6.447378e+02	4.867087e+02	-1.651007e+02	3.047839e+02	8.542559e+01	6.707778e+02	8.551802e+02	7.397142e+02	1.558815e+03	-7.260321e+01	1.643043e+03	2.709571e+02
5.390000e+02	6.526829e+03	2.502688e+03	3.024179e+02	1.512100e+03	1.543913e+03	7.731762e+02	5.450280e+02	-2.106830e+02	2.192025e+02	8.321353e+01	7.882141e+02	9.989949e+02	7.238811e+02	1.655132e+03	-1.449346e+02	1.688842e+03	1.947769e+02
5.400000e+02	6.464040e+03	2.451727e+03	2.032566e+02	1.614666e+03	1.471340e+03	9.316252e+02	6.160795e+02	-2.596713e+02	1.106935e+02	9.256101e+01	9.208194e+02	1.151735e+03	6.938426e+02	1.726963e+03	-2.229850e+02	1.694319e+03	8.072416e+01
5.410000e+02	6.394784e+03	2.338558e+03	9.997643e+01	1.701326e+03	1.337348e+03	1.106594e+03	6.899809e+02	-3.079606e+02	-1.573042e+01	1.157047e+02	1.054223e+03	1.293388e+03	6.471009e+02	1.753151e+03	-3.009093e+02	1.638250e+03	-7.270175e+01
5.420000e+02	6.328721e+03	2.148383e+03	-1.168377e+00	1.758090e+03	1.134658e+03	1.281099e+03	7.574717e+02	-3.535309e+02	-1.521718e+02	1.510013e+02	1.174417e+03	1.405728e+03	5.836712e+02	1.717113e+03	-3.726277e+02	1.507278e+03	-2.621977e+02
5.430000e+02	6.282996e+03	1.877822e+03	-9.688421e+01	1.777200e+03	8.674784e+02	1.437898e+03	8.128741e+02	-3.970876e+02	-2.894308e+02	1.925447e+02	1.270647e+03	1.476998e+03	5.065527e+02	1.611101e+03	-4.324808e+02	1.299952e+03	-4.793584e+02
5.440000e+02	6.281630e+03	1.538015e+03	-1.866591e+02	1.758841e+03	5.523269e+02	1.562546e+03	8.554456e+02	-4.410932e+02	-4.180705e+02	2.314098e+02	1.337011e+03	1.504409e+03	4.218299e+02	1.438633e+03	-4.756925e+02	1.028013e+03	-7.110729e+02
5.450000e+02	6.351683e+03	1.155349e+03	-2.703858e+02	1.711102e+03	2.160979e+02	1.645835e+03	8.888655e+02	-4.874650e+02	-5.286954e+02	2.583082e+02	1.372706e+03	1.494026e+03	3.383973e+02	1.214570e+03	-4.986632e+02	7.147547e+02	-9.406784e+02
5.460000e+02	6.516904e+03	7.693368e+02	-3.449235e+02	1.648641e+03	-1.081804e+02	1.685451e+03	9.193349e+02	-5.349641e+02	-6.117650e+02	2.668403e+02	1.381388e+03	1.458603e+03	2.672542e+02	9.629641e+02	-4.992778e+02	3.910917e+02	-1.149895e+03
5.470000e+02	6.790592e+03	4.274659e+02	-4.015097e+02	1.590561e+03	-3.870388e+02	1.686705e+03	9.532084e+02	-5.776498e+02	-6.576547e+02	2.561438e+02	1.370283e+03	1.414424e+03	2.202793e+02	7.131448e+02	-4.773555e+02	9.031214e+01	-1.321453e+03
5.480000e+02	7.169613e+03	1.772655e+02	-4.258407e+02	1.557678e+03	-5.925921e+02	1.661997e+03	9.950570e+02	-6.054649e+02	-6.576401e+02	2.317981e+02	1.349254e+03	1.378057e+03	2.084259e+02	4.948039e+02	-4.351443e+02	-1.574507e+02	-1.442088e+03
5.490000e+02	7.631284e+03	5.663932e+01	-4.015831e+02	1.569046e+03	-7.076829e+02	1.628590e+03	1.046647e+03	-6.071153e+02	-6.060036e+02	2.044189e+02	1.329603e+03	1.363517e+03	2.394435e+02	3.328848e+02	-3.775253e+02	-3.301585e+02	-1.505246e+03
5.500000e+02	8.134154e+03	8.451922e+01	-3.164487e+02	1.637739e+03	-7.290123e+02	1.604707e+03	1.106821e+03	-5.742918e+02	-5.027520e+02	1.863013e+02	1.322240e+03	1.379901e+03	3.155009e+02	2.431924e+02	-3.115856e+02	-4.174253e+02	-1.512651e+03
5.510000e+02	8.623026e+03	2.546141e+02	-1.685318e+02	1.766598e+03	-6.674568e+02	1.604748e+03	1.171938e+03	-5.055214e+02	-3.558643e+02	1.873299e+02	1.335229e+03	1.429613e+03	4.313701e+02	2.296393e+02	-2.454804e+02	-4.219728e+02	-1.473981e+03
5.520000e+02	9.037825e+03	5.348010e+02	2.987685e+01	1.945381e+03	-5.454019e+02	1.635186e+03	1.236552e+03	-4.079446e+02	-1.818609e+02	2.117345e+02	1.371421e+03	1.507566e+03	5.739628e+02	2.838712e+02	-1.868998e+02	-3.584964e+02	-1.404506e+03
5.530000e+02	9.325002e+03	8.732125e+02	2.529673e+02	2.151015e+03	-3.917360e+02	1.692798e+03	1.294187e+03	-2.961437e+02	-3.937361e+00	2.569008e+02	1.427207e+03	1.601912e+03	7.238106e+02	3.875220e+02	-1.417113e+02	-2.500176e+02	-1.321297e+03
5.540000e+02	9.449246e+03	1.209749e+03	4.667545e+02	2.351719e+03	-2.358610e+02	1.766058e+03	1.338253e+03	-1.883779e+02	1.522227e+02	3.145273e+02	1.493208e+03	1.696595e+03	8.585143e+02	5.166038e+02	-1.132785e+02	-1.225749e+02	-1.239267e+03
5.550000e+02	9.402443e+03	1.489631e+03	6.373509e+02	2.514200e+03	-1.023445e+02	1.839132e+03	1.363111e+03	-1.016079e+02	2.639087e+02	3.734374e+02	1.556788e+03	1.775250e+03	9.574155e+02	6.468084e+02	-1.025835e+02	2.463609e-01	-1.168332e+03
5.560000e+02	9.206887e+03	1.674831e+03	7.393220e+02	2.611552e+03	-7.489497e+00	1.896777e+03	1.365133e+03	-4.702896e+01	3.165039e+02	4.228135e+02	1.605424e+03	1.825209e+03	1.006131e+03	7.581644e+02	-1.088297e+02	1.013463e+02	-1.112429e+03
5.570000e+02	8.911020e+03	1.750220e+03	7.614463e+02	2.629033e+03	4.172875e+01	1.928199e+03	1.343478e+03	-2.742307e+01	3.067008e+02	4.547413e+02	1.629545e+03	1.840171e+03	9.994916e+02	8.377915e+02	-1.299795e+02	1.717123e+02	-1.070221e+03
5.580000e+02	8.578299e+03	1.723509e+03	7.084300e+02	2.565850e+03	4.680823e+01	1.928699e+03	1.300314e+03	-3.682076e+01	2.428844e+02	4.655422e+02	1.623905e+03	1.820605e+03	9.419476e+02	8.803360e+02	-1.628422e+02	2.096520e+02	-1.036692e+03
5.590000e+02	8.272355e+03	1.620301e+03	5.986895e+02	2.432913e+03	1.589984e+01	1.899187e+03	1.240416e+03	-6.219868e+01	1.426933e+02	4.559939e+02	1.587424e+03	1.772028e+03	8.454900e+02	8.866401e+02	-2.027753e+02	2.186742e+02	-1.004753e+03
5.600000e+02	8.043002e+03	1.476774e+03	4.594572e+02	2.248193e+03	-3.811059e+01	1.844555e+03	1.170236e+03	-8.653949e+01	2.862098e+01	4.308350e+02	1.522167e+03	1.702198e+03	7.260266e+02	8.617825e+02	-2.434824e+02	2.053685e+02	-9.664435e+02
5.610000e+02	7.917227e+03	1.332291e+03	3.208333e+02	2.031906e+03	-9.925270e+01	1.771989e+03	1.096673e+03	-9.252636e+01	-7.701801e+01	3.978512e+02	1.432284e+03	1.618546e+03	5.996209e+02	8.135364e+02	-2.774626e+02	1.782049e+02	-9.139059e+02
5.620000e+02	7.897165e+03	1.223190e+03	2.101526e+02	1.803118e+03	-1.499888e+02	1.689695e+03	1.025828e+03	-6.622270e+01	-1.564234e+02	3.665765e+02	1.323320e+03	1.526741e+03	4.797967e+02	7.516452e+02	-2.972886e+02	1.472938e+02	-8.405024e+02
5.630000e+02	7.964283e+03	1.178072e+03	1.475619e+02	1.578175e+03	-1.728815e+02	1.605827e+03	9.619932e+02	-1.089919e-01	-1.989830e+02	3.465460e+02	1.201727e+03	1.430502e+03	3.764458e+02	6.875611e+02	-2.972867e+02	1.243991e+02	-7.422153e+02
5.640000e+02	8.087163e+03	1.214611e+03	1.433374e+02	1.370344e+03	-1.524646e+02	1.527198e+03	9.071904e+02	1.051773e+02	-2.018831e+02	3.452215e+02	1.074212e+03	1.332181e+03	2.961287e+02	6.339154e+02	-2.747843e+02	1.223139e+02	-6.189193e+02
5.650000e+02	8.229861e+03	1.338105e+03	1.972200e+02	1.189817e+03	-7.703511e+01	1.457743e+03	8.614709e+02	2.409447e+02	-1.688487e+02	3.660694e+02	9.467534e+02	1.233539e+03	2.430608e+02	6.031783e+02	-2.302013e+02	1.531614e+02	-4.747988e+02
5.660000e+02	8.358773e+03	1.542113e+03	2.997667e+02	1.043600e+03	6.001796e+01	1.397314e+03	8.239668e+02	3.925348e+02	-1.076934e+02	4.074602e+02	8.235950e+02	1.136366e+03	2.200013e+02	6.055480e+02	-1.658854e+02	2.258997e+02	-3.173851e+02
5.670000e+02	8.447321e+03	1.811110e+03	4.352892e+02	9.353007e+02	2.595077e+02	1.341571e+03	7.943301e+02	5.428874e+02	-2.760577e+01	4.628943e+02	7.067585e+02	1.042897e+03	2.285383e+02	6.466731e+02	-8.434553e+01	3.438507e+02	-1.553602e+02
5.680000e+02	8.478667e+03	2.124276e+03	5.855284e+02	8.651317e+02	5.161872e+02	1.283388e+03	7.738852e+02	6.764710e+02	6.297390e+01	5.225530e+02	5.964259e+02	9.560724e+02	2.687018e+02	7.260205e+02	1.305070e+01	5.031351e+02	3.984588e+00
5.690000e+02	8.446979e+03	2.459057e+03	7.330515e+02	8.303245e+02	8.186356e+02	1.215376e+03	7.658284e+02	7.822867e+02	1.574174e+02	5.756318e+02	4.920854e+02	8.795582e+02	3.382351e+02	8.364952e+02	1.260850e+02	6.925499e+02	1.564256e+02
5.700000e+02	8.357641e+03	2.793375e+03	8.636231e+02	8.259527e+02	1.149254e+03	1.132545e+03	7.742127e+02	8.550625e+02	2.509668e+02	6.126534e+02	3.939003e+02	8.173907e+02	4.320486e+02	9.654682e+02	2.543215e+02	8.949323e+02	3.007608e+02
5.710000e+02	8.226670e+03	3.106390e+03	9.673704e+02	8.459800e+02	1.484786e+03	1.034095e+03	8.020953e+02	8.945953e+02	3.402565e+02	6.271105e+02	3.036665e+02	7.732039e+02	5.423100e+02	1.096936e+03	3.951120e+02	1.089674e+03	4.370381e+02
5.720000e+02	8.079529e+03	3.378830e+03	1.039084e+03	8.843308e+02	1.798032e+03	9.238365e+02	8.497517e+02	9.040134e+02	4.228564e+02	6.162239e+02	2.249933e+02	7.492592e+02	6.593343e+02	1.214289e+03	5.421398e+02	1.255891e+03	5.639707e+02
5.730000e+02	7.949444e+03	3.594196e+03	1.078167e+03	9.358317e+02	2.061173e+03	8.094961e+02	9.139352e+02	8.880702e+02	4.971449e+02	5.810180e+02	1.627695e+02	7.457343e+02	7.730594e+02	1.303104e+03	6.854577e+02	1.375714e+03	6.769028e+02
5.740000e+02	7.875025e+03	3.741537e+03	1.088512e+03	9.969175e+02	2.250426e+03	7.015376e+02	9.887164e+02	8.522918e+02	5.624222e+02	5.260861e+02	1.222960e+02	7.606964e+02	8.746190e+02	1.353457e+03	8.132652e+02	1.437160e+03	7.674545e+02
5.750000e+02	7.896664e+03	3.819119e+03	1.078224e+03	1.065996e+03	2.350909e+03	6.121025e+02	1.067671e+03	8.031056e+02	6.189279e+02	4.592933e+02	1.085119e+02	7.908758e+02	9.574815e+02	1.361350e+03	9.148618e+02	1.436046e+03	8.251696e+02
5.760000e+02	8.051121e+03	3.837259e+03	1.058883e+03	1.143368e+03	2.360168e+03	5.541916e+02	1.146484e+03	7.484236e+02	6.674934e+02	3.913866e+02	1.255259e+02	8.329072e+02	1.017840e+03	1.329006e+03	9.836784e+02	1.376489e+03	8.405557e+02
5.770000e+02	8.364215e+03	3.818323e+03	1.044120e+03	1.230628e+03	2.289020e+03	5.407235e+02	1.224737e+03	6.978880e+02	7.088833e+02	3.352346e+02	1.763400e+02	8.843945e+02	1.054286e+03	1.263965e+03	1.019247e+03	1.269774e+03	8.083077e+02
5.780000e+02	8.842437e+03	3.792765e+03	1.047534e+03	1.329533e+03	2.159181e+03	5.828942e+02	1.305913e+03	6.621703e+02	7.431819e+02	3.043501e+02	2.624279e+02	9.441681e+02	1.067103e+03	1.177159e+03	1.027367e+03	1.131816e+03	7.295023e+02
5.790000e+02	9.465385e+03	3.791531e+03	1.080124e+03	1.440432e+03	1.998239e+03	6.874983e+02	1.395369e+03	6.511764e+02	7.696115e+02	3.105112e+02	3.828550e+02	1.011484e+03	1.057575e+03	1.080389e+03	1.018380e+03	9.798623e+02	6.120780e+02
5.800000e+02	1.018162e+04	3.836790e+03	1.147563e+03	1.560532e+03	1.833482e+03	8.535150e+02	1.496961e+03	6.714988e+02	7.868835e+02	3.606786e+02	5.329440e+02	1.084467e+03	1.027586e+03	9.838203e+02	1.004121e+03	8.293651e+02	4.696482e+02
5.810000e+02	1.091051e+04	3.933961e+03	1.247751e+03	1.682478e+03	1.686451e+03	1.069047e+03	1.609689e+03	7.238565e+02	7.938215e+02	4.539285e+02	7.029735e+02	1.158584e+03	9.795027e+02	8.941664e+02	9.945669e+02	6.918897e+02	3.192466e+02
5.820000e+02	1.155172e+04	4.068141e+03	1.369419e+03	1.793964e+03	1.569780e+03	1.310231e+03	1.725939e+03	8.014922e+02	7.898394e+02	5.795790e+02	8.777836e+02	1.226038e+03	9.161791e+02	8.140172e+02	9.952813e+02	5.745052e+02	1.787486e+02
5.830000e+02	1.200194e+04	4.206928e+03	1.492819e+03	1.879079e+03	1.486978e+03	1.543614e+03	1.832342e+03	8.904604e+02	7.750574e+02	7.177609e+02	1.038158e+03	1.276723e+03	8.409206e+02	7.424434e+02	1.006483e+03	4.805007e+02	6.449730e+01
5.840000e+02	1.217622e+04	4.309563e+03	1.593320e+03	1.921692e+03	1.434686e+03	1.732430e+03	1.913254e+03	9.723029e+02	7.502000e+02	8.431182e+02	1.164298e+03	1.300679e+03	7.573943e+02	6.765499e+02	1.023936e+03	4.107566e+02	-1.067784e+01
5.850000e+02	1.202869e+04	4.339802e+03	1.647776e+03	1.910359e+03	1.406151e+03	1.845605e+03	1.955706e+03	1.028746e+03	7.166492e+02	9.311258e+02	1.240747e+03	1.291332e+03	6.696134e+02	6.133350e+02	1.041220e+03	3.649364e+02	-3.904100e+01
5.860000e+02	1.156682e+04	4.278209e+03	1.642058e+03	1.843299e+03	1.394443e+03	1.866673e+03	1.954022e+03	1.047066e+03	6.768776e+02	9.651786e+02	1.261212e+03	1.248311e+03	5.820890e+02	5.511390e+02	1.052521e+03	3.419280e+02	-1.905113e+01
5.870000e+02	1.085423e+04	4.129421e+03	1.576930e+03	1.731423e+03	1.394509e+03	1.799273e+03	1.912427e+03	1.024175e+03	6.350794e+02	9.418488e+02	1.231370e+03	1.178672e+03	5.000549e+02	4.902037e+02	1.054996e+03	3.395181e+02	4.429371e+01
5.880000e+02	1.000038e+04	3.921798e+03	1.469557e+03	1.597739e+03	1.403911e+03	1.666784e+03	1.844799e+03	9.677321e+02	5.974419e+02	8.721135e+02	1.168271e+03	1.095917e+03	4.294695e+02	4.322981e+02	1.050122e+03	3.537928e+02	1.402130e+02
5.890000e+02	9.138988e+03	3.699719e+03	1.349359e+03	1.472658e+03	1.422727e+03	1.505867e+03	1.771794e+03	8.936885e+02	5.714854e+02	7.778718e+02	1.096176e+03	1.016990e+03	3.764829e+02	3.797889e+02	1.043793e+03	3.789365e+02	2.541060e+02
5.900000e+02	8.400580e+03	3.511467e+03	1.249309e+03	1.386352e+03	1.453089e+03	1.356090e+03	1.716330e+03	8.211373e+02	5.643044e+02	6.850029e+02	1.040071e+03	9.581816e+02	3.462814e+02	3.347337e+02	1.045238e+03	4.078524e+02	3.703411e+02
5.910000e+02	7.885746e+03	3.396740e+03	1.195770e+03	1.360593e+03	1.498493e+03	1.249280e+03	1.698639e+03	7.663731e+02	5.801612e+02	6.156060e+02	1.018991e+03	9.311974e+02	3.416009e+02	2.984604e+02	1.064961e+03	4.335322e+02	4.750619e+02
5.920000e+02	7.645502e+03	3.377393e+03	1.200624e+03	1.402851e+03	1.562638e+03	1.202174e+03	1.731881e+03	7.382847e+02	6.183670e+02	5.822533e+02	1.041354e+03	9.405129e+02	3.614951e+02	2.717578e+02	1.111958e+03	4.506800e+02	5.581288e+02
5.930000e+02	7.673318e+03	3.453529e+03	1.258568e+03	1.504724e+03	1.647718e+03	1.214442e+03	1.819087e+03	7.365297e+02	6.724742e+02	5.860897e+02	1.103735e+03	9.826863e+02	4.009865e+02	2.554441e+02	1.190734e+03	4.569841e+02	6.137254e+02
5.940000e+02	7.910760e+03	3.605490e+03	1.350414e+03	1.645288e+03	1.752606e+03	1.272126e+03	1.952086e+03	7.528456e+02	7.314092e+02	6.189994e+02	1.193330e+03	1.047721e+03	4.519550e+02	2.508994e+02	1.298960e+03	4.536453e+02	6.398210e+02
5.950000e+02	8.265374e+03	3.800946e+03	1.451041e+03	1.798293e+03	1.871885e+03	1.354740e+03	2.112938e+03	7.747991e+02	7.824588e+02	6.685765e+02	1.293144e+03	1.122052e+03	5.051456e+02	2.602133e+02	1.426775e+03	4.451099e+02	6.371971e+02
5.960000e+02	8.636109e+03	4.005188e+03	1.539054e+03	1.940776e+03	1.996595e+03	1.443322e+03	2.277921e+03	7.905946e+02	8.152453e+02	7.238015e+02	1.388079e+03	1.192320e+03	5.526935e+02	2.858276e+02	1.558402e+03	4.381939e+02	6.087868e+02
5.970000e+02	8.939018e+03	4.191721e+03	1.604644e+03	2.060112e+03	2.116734e+03	1.526681e+03	2.423271e+03	7.933480e+02	8.253157e+02	7.793217e+02	1.469816e+03	1.248820e+03	5.902926e+02	3.297949e+02	1.675914e+03	4.408217e+02	5.596262e+02
5.980000e+02	9.125591e+03	4.349771e+03	1.652886e+03	2.156974e+03	2.224517e+03	1.603907e+03	2.530974e+03	7.834787e+02	8.159648e+02	8.369149e+02	1.538777e+03	1.287570e+03	6.181937e+02	3.929177e+02	1.763984e+03	4.605353e+02	4.971118e+02
5.990000e+02	9.188517e+03	4.485929e+03	1.701280e+03	2.243119e+03	2.316795e+03	1.682556e+03	2.592639e+03	7.684942e+02	7.974710e+02	9.038040e+02	1.602495e+03	1.310337e+03	6.406218e+02	4.740405e+02	1.813890e+03	5.029092e+02	4.309121e+02
6.000000e+02	9.154284e+03	4.619150e+03	1.772486e+03	2.334912e+03	2.395390e+03	1.773469e+03	2.610120e+03	7.602890e+02	7.838576e+02	9.886243e+02	1.671108e+03	1.322720e+03	6.638030e+02	5.697143e+02	1.825277e+03	5.701181e+02	3.720431e+02
6.010000e+02	9.066867e+03	4.771070e+03	1.884919e+03	2.445210e+03	2.465300e+03	1.884425e+03	2.593001e+03	7.709183e+02	7.882552e+02	1.096661e+03	1.751861e+03	1.331214e+03	6.933486e+02	6.743642e+02	1.805238e+03	6.600673e+02	3.311670e+02
6.020000e+02	8.969670e+03	4.955816e+03	2.044718e+03	2.576952e+03	2.531935e+03	2.015168e+03	2.554397e+03	8.083288e+02	8.185264e+02	1.226191e+03	1.844931e+03	1.340566e+03	7.320211e+02	7.810073e+02	1.765420e+03	7.665225e+02	3.167484e+02
6.030000e+02	8.892614e+03	5.173887e+03	2.242069e+03	2.721043e+03	2.599129e+03	2.155731e+03	2.507108e+03	8.735454e+02	8.747657e+02	1.367303e+03	1.942279e+03	1.352522e+03	7.787643e+02	8.824462e+02	1.718680e+03	8.804564e+02	3.339146e+02
6.040000e+02	8.848114e+03	5.412838e+03	2.453211e+03	2.859170e+03	2.669111e+03	2.288499e+03	2.461637e+03	9.602869e+02	9.496064e+02	1.503606e+03	2.029811e+03	1.366247e+03	8.293601e+02	9.727063e+02	1.676744e+03	9.923754e+02	3.845773e+02
6.050000e+02	8.835438e+03	5.654291e+03	2.647331e+03	2.970076e+03	2.744387e+03	2.392935e+03	2.426272e+03	1.057103e+03	1.031189e+03	1.616145e+03	2.091695e+03	1.379848e+03	8.783811e+02	1.048321e+03	1.649481e+03	1.094913e+03	4.687288e+02
6.060000e+02	8.849524e+03	5.883730e+03	2.795708e+03	3.036399e+03	2.830152e+03	2.450972e+03	2.408284e+03	1.151202e+03	1.107593e+03	1.688117e+03	2.114870e+03	1.391893e+03	9.215297e+02	1.108994e+03	1.645428e+03	1.184732e+03	5.861828e+02
6.070000e+02	8.889116e+03	6.098189e+03	2.879768e+03	3.049302e+03	2.935342e+03	2.451170e+03	2.414789e+03	1.232518e+03	1.170957e+03	1.708812e+03	2.092035e+03	1.402052e+03	9.572679e+02	1.157265e+03	1.672429e+03	1.262919e+03	7.377249e+02
6.080000e+02	8.960324e+03	6.307941e+03	2.895281e+03	3.009410e+03	3.070910e+03	2.390635e+03	2.452263e+03	1.296504e+03	1.219609e+03	1.675673e+03	2.022472e+03	1.410634e+03	9.869393e+02	1.197107e+03	1.737300e+03	1.333615e+03	9.248280e+02
6.090000e+02	9.074450e+03	6.531013e+03	2.851575e+03	2.924411e+03	3.245296e+03	2.274800e+03	2.524624e+03	1.344639e+03	1.257398e+03	1.594178e+03	1.911139e+03	1.417477e+03	1.013274e+03	1.231811e+03	1.844002e+03	1.401298e+03	1.147716e+03
6.100000e+02	9.241697e+03	6.782642e+03	2.766582e+03	2.804982e+03	3.458544e+03	2.115847e+03	2.630636e+03	1.382577e+03	1.290576e+03	1.476006e+03	1.767057e+03	1.420979e+03	1.037927e+03	1.261856e+03	1.990795e+03	1.467752e+03	1.402360e+03
6.110000e+02	9.464077e+03	7.064037e+03	2.659991e+03	2.660976e+03	3.697501e+03	1.930546e+03	2.761782e+03	1.416800e+03	1.323638e+03	1.336353e+03	1.601786e+03	1.417786e+03	1.059191e+03	1.283618e+03	2.167589e+03	1.529914e+03	1.677656e+03
6.120000e+02	9.730746e+03	7.355334e+03	2.547216e+03	2.499191e+03	3.934505e+03	1.737953e+03	2.901646e+03	1.451259e+03	1.355947e+03	1.191270e+03	1.428189e+03	1.403235e+03	1.071003e+03	1.289538e+03	2.354963e+03	1.579543e+03	1.954244e+03
6.130000e+02	1.001759e+04	7.616190e+03	2.436261e+03	2.323053e+03	4.130901e+03	1.557045e+03	3.027374e+03	1.485459e+03	1.380662e+03	1.055599e+03	1.259230e+03	1.372252e+03	1.063823e+03	1.269912e+03	2.525929e+03	1.604971e+03	2.206092e+03
6.140000e+02	1.029102e+04	7.794721e+03	2.328256e+03	2.133809e+03	4.245037e+03	1.404403e+03	3.113224e+03	1.514829e+03	1.386510e+03	9.417468e+02	1.106581e+03	1.320381e+03	1.027227e+03	1.215854e+03	2.650568e+03	1.594467e+03	2.405014e+03
6.150000e+02	1.051456e+04	7.842441e+03	2.221009e+03	1.932550e+03	4.242753e+03	1.292306e+03	3.135654e+03	1.533245e+03	1.361772e+03	8.592373e+02	9.792043e+02	1.244784e+03	9.533430e+02	1.122553e+03	2.702585e+03	1.540165e+03	2.527182e+03
6.160000e+02	1.065623e+04	7.730457e+03	2.113842e+03	1.722424e+03	4.107294e+03	1.227705e+03	3.078859e+03	1.536643e+03	1.299016e+03	8.148278e+02	8.823999e+02	1.145219e+03	8.400189e+02	9.918396e+02	2.665982e+03	1.441307e+03	2.559679e+03
6.170000e+02	1.069508e+04	7.461447e+03	2.011614e+03	1.510492e+03	3.845605e+03	1.212355e+03	2.939335e+03	1.526117e+03	1.198784e+03	8.128311e+02	8.177720e+02	1.024989e+03	6.927140e+02	8.332513e+02	2.539811e+03	1.305788e+03	2.504846e+03
6.180000e+02	1.062580e+04	7.073011e+03	1.926162e+03	1.308698e+03	3.488964e+03	1.243870e+03	2.728049e+03	1.509073e+03	1.070903e+03	8.552597e+02	7.840984e+02	8.915999e+02	5.245917e+02	6.632802e+02	2.339440e+03	1.149518e+03	2.380690e+03
6.190000e+02	1.046073e+04	6.630822e+03	1.874426e+03	1.133411e+03	3.087581e+03	1.317003e+03	2.469294e+03	1.497730e+03	9.329180e+02	9.415091e+02	7.786018e+02	7.567057e+02	3.548012e+02	5.029851e+02	2.093801e+03	9.937733e+02	2.216931e+03
6.200000e+02	1.022874e+04	6.213420e+03	1.873794e+03	1.003326e+03	2.700589e+03	1.424468e+03	2.196211e+03	1.505405e+03	8.062089e+02	1.067585e+03	7.979190e+02	6.349281e+02	2.053985e+02	3.745528e+02	1.839329e+03	8.612538e+02	2.047730e+03
6.210000e+02	9.971135e+03	5.893428e+03	1.936353e+03	9.359825e+02	2.384177e+03	1.557038e+03	1.944069e+03	1.541928e+03	7.110982e+02	1.225255e+03	8.383318e+02	5.415490e+02	9.764296e+01	2.976210e+02	1.612287e+03	7.718843e+02	1.903344e+03
6.220000e+02	9.735387e+03	5.721146e+03	2.064270e+03	9.438827e+02	2.181027e+03	1.703288e+03	1.743171e+03	1.609966e+03	6.625093e+02	1.401759e+03	8.953625e+02	4.895728e+02	4.851366e+01	2.861754e+02	1.441645e+03	7.393779e+02	1.803287e+03
6.230000e+02	9.568081e+03	5.715500e+03	2.248121e+03	1.031478e+03	2.113720e+03	1.849745e+03	1.613454e+03	1.703704e+03	6.674184e+02	1.580700e+03	9.632832e+02	4.870568e+02	6.818950e+01	3.466456e+02	1.344411e+03	7.693059e+02	1.753006e+03
6.240000e+02	9.508775e+03	5.864385e+03	2.468857e+03	1.194074e+03	2.183305e+03	1.982062e+03	1.562170e+03	1.810357e+03	7.245624e+02	1.744291e+03	1.035151e+03	5.355719e+02	1.589192e+02	4.774507e+02	1.324402e+03	8.589014e+02	1.744772e+03
6.250000e+02	9.585395e+03	6.132841e+03	2.702563e+03	1.418870e+03	2.372479e+03	2.087248e+03	1.584862e+03	1.913868e+03	8.259708e+02	1.876587e+03	1.103631e+03	6.301765e+02	3.152377e+02	6.697872e+02	1.374204e+03	9.982750e+02	1.762009e+03
6.260000e+02	9.810623e+03	6.474632e+03	2.926050e+03	1.687377e+03	2.651348e+03	2.156317e+03	1.668541e+03	1.999296e+03	9.592600e+02	1.966784e+03	1.162322e+03	7.606259e+02	5.250547e+02	9.090844e+02	1.479011e+03	1.172338e+03	1.785161e+03
6.270000e+02	1.017817e+04	6.842197e+03	3.121122e+03	1.977983e+03	2.983271e+03	2.186327e+03	1.795357e+03	2.056220e+03	1.109573e+03	2.011541e+03	1.206991e+03	9.130872e+02	7.709943e+02	1.176476e+03	1.620574e+03	1.362699e+03	1.796912e+03
6.280000e+02	1.065889e+04	7.191770e+03	3.276178e+03	2.267746e+03	3.329074e+03	2.180996e+03	1.945328e+03	2.080114e+03	1.260597e+03	2.015572e+03	1.236124e+03	1.071690e+03	1.031626e+03	1.449966e+03	1.779906e+03	1.549169e+03	1.785209e+03
6.290000e+02	1.119866e+04	7.483832e+03	3.385270e+03	2.533402e+03	3.649485e+03	2.149640e+03	2.097732e+03	2.071599e+03	1.394949e+03	1.990310e+03	1.250655e+03	1.219743e+03	1.282752e+03	1.705537e+03	1.938405e+03	1.711082e+03	1.743763e+03
6.300000e+02	1.172140e+04	7.681923e+03	3.445883e+03	2.752440e+03	3.907096e+03	2.104800e+03	2.231851e+03	2.034400e+03	1.494839e+03	1.951032e+03	1.253115e+03	1.340971e+03	1.499332e+03	1.918868e+03	2.078085e+03	1.829012e+03	1.670827e+03
6.310000e+02	1.213964e+04	7.753399e+03	3.457051e+03	2.905136e+03	4.069393e+03	2.059242e+03	2.328159e+03	1.973170e+03	1.543892e+03	1.913146e+03	1.246636e+03	1.421272e+03	1.658508e+03	2.068207e+03	2.182064e+03	1.887329e+03	1.567636e+03
6.320000e+02	1.237167e+04	7.673739e+03	3.418665e+03	2.977635e+03	4.113365e+03	2.023004e+03	2.370529e+03	1.892035e+03	1.530205e+03	1.888446e+03	1.234110e+03	1.451024e+03	1.743534e+03	2.138255e+03	2.235972e+03	1.877392e+03	1.437503e+03
6.330000e+02	1.236050e+04	7.432862e+03	3.331837e+03	2.965036e+03	4.030415e+03	2.000957e+03	2.348960e+03	1.794090e+03	1.449734e+03	1.882090e+03	1.217523e+03	1.427309e+03	1.747522e+03	2.123945e+03	2.230093e+03	1.800320e+03	1.285798e+03
6.340000e+02	1.208783e+04	7.039847e+03	3.199459e+03	2.872857e+03	3.829250e+03	1.991358e+03	2.261612e+03	1.681575e+03	1.308436e+03	1.891010e+03	1.197397e+03	1.354993e+03	1.675470e+03	2.032513e+03	2.161264e+03	1.667984e+03	1.120234e+03
6.350000e+02	1.157786e+04	6.522938e+03	3.026301e+03	2.715852e+03	3.534783e+03	1.985828e+03	2.115022e+03	1.556330e+03	1.121926e+03	1.904363e+03	1.172438e+03	1.245900e+03	1.543422e+03	1.882631e+03	2.033556e+03	1.501223e+03	9.507045e+02
6.360000e+02	1.089000e+04	5.924271e+03	2.818662e+03	2.514428e+03	3.182863e+03	1.971184e+03	1.922305e+03	1.420327e+03	9.123912e+02	1.906259e+03	1.139681e+03	1.116111e+03	1.374754e+03	1.700484e+03	1.857380e+03	1.325479e+03	7.882711e+02
6.370000e+02	1.010385e+04	5.291594e+03	2.584132e+03	2.290211e+03	2.812641e+03	1.933011e+03	1.700197e+03	1.276253e+03	7.038159e+02	1.880307e+03	1.095400e+03	9.823470e+02	1.194817e+03	1.514008e+03	1.647493e+03	1.165144e+03	6.435256e+02
6.380000e+02	9.302169e+03	4.670469e+03	2.331959e+03	2.062590e+03	2.459368e+03	1.860160e+03	1.466225e+03	1.128125e+03	5.172110e+02	1.814740e+03	1.036747e+03	8.587689e+02	1.025849e+03	1.347221e+03	1.420805e+03	1.038559e+03	5.249710e+02
6.390000e+02	8.556813e+03	4.099459e+03	2.073809e+03	1.847302e+03	2.149899e+03	1.748674e+03	1.236932e+03	9.816971e+02	3.674112e+02	1.706392e+03	9.635417e+02	7.551997e+02	8.837643e+02	1.216422e+03	1.194650e+03	9.552441e+02	4.380239e+02
6.400000e+02	7.920488e+03	3.608616e+03	1.824118e+03	1.656806e+03	1.901623e+03	1.603590e+03	1.027215e+03	8.443011e+02	2.620965e+02	1.562018e+03	8.793694e+02	6.769957e+02	7.774402e+02	1.129106e+03	9.856428e+02	9.159744e+02	3.848555e+02
6.410000e+02	7.424465e+03	3.219775e+03	1.599095e+03	1.501264e+03	1.723906e+03	1.437763e+03	8.500920e+02	7.238531e+02	2.026816e+02	1.396411e+03	7.912499e+02	6.260272e+02	7.100173e+02	1.085347e+03	8.087405e+02	9.151592e+02	3.648299e+02
6.420000e+02	7.080910e+03	2.946743e+03	1.414100e+03	1.388852e+03	1.620385e+03	1.268027e+03	7.161326e+02	6.271522e+02	1.861062e+02	1.227993e+03	7.077630e+02	6.019071e+02	6.810918e+02	1.080648e+03	6.760998e+02	9.442791e+02	3.750703e+02
6.430000e+02	6.887802e+03	2.794454e+03	1.280100e+03	1.324902e+03	1.590686e+03	1.110109e+03	6.322453e+02	5.579998e+02	2.065758e+02	1.073524e+03	6.362313e+02	6.028048e+02	6.886740e+02	1.109003e+03	5.956615e+02	9.950177e+02	4.107879e+02
6.440000e+02	6.834297e+03	2.757574e+03	1.200559e+03	1.310340e+03	1.630984e+03	9.741823e+02	6.002162e+02	5.158848e+02	2.567718e+02	9.437880e+02	5.800817e+02	6.256673e+02	7.302613e+02	1.165171e+03	5.698234e+02	1.061153e+03	4.653397e+02
6.450000e+02	6.904617e+03	2.819853e+03	1.170163e+03	1.340451e+03	1.733675e+03	8.626012e+02	6.157676e+02	4.958225e+02	3.285720e+02	8.415920e+02	5.375155e+02	6.661118e+02	8.029384e+02	1.245593e+03	5.947600e+02	1.138907e+03	5.303018e+02
6.460000e+02	7.079272e+03	2.955336e+03	1.175991e+03	1.404912e+03	1.886829e+03	7.704375e+02	6.687945e+02	4.894895e+02	4.135703e+02	7.624218e+02	5.021068e+02	7.184116e+02	9.028078e+02	1.347918e+03	6.607805e+02	1.226040e+03	5.959373e+02
6.470000e+02	7.333693e+03	3.131659e+03	1.200762e+03	1.489352e+03	2.074066e+03	6.883485e+02	7.449305e+02	4.872731e+02	5.036092e+02	6.971538e+02	4.651488e+02	7.758648e+02	1.024206e+03	1.469521e+03	7.537374e+02	1.320319e+03	6.522529e+02
6.480000e+02	7.635901e+03	3.314684e+03	1.226944e+03	1.577994e+03	2.275282e+03	6.065259e+02	8.280470e+02	4.805161e+02	5.913100e+02	6.356352e+02	4.188466e+02	8.315675e+02	1.159150e+03	1.605779e+03	8.571577e+02	1.418115e+03	6.904897e+02
6.490000e+02	7.945708e+03	3.473290e+03	1.240341e+03	1.656492e+03	2.468377e+03	5.182544e+02	9.029964e+02	4.632333e+02	6.704560e+02	5.698864e+02	3.591280e+02	8.793864e+02	1.297367e+03	1.748927e+03	9.546297e+02	1.513738e+03	7.046109e+02
6.500000e+02	8.217557e+03	3.583269e+03	1.232193e+03	1.714158e+03	2.631864e+03	4.219432e+02	9.579394e+02	4.328791e+02	7.361493e+02	4.960455e+02	2.870450e+02	9.148455e+02	1.427116e+03	1.888139e+03	1.032043e+03	1.599812e+03	6.922829e+02
6.510000e+02	8.407298e+03	3.629718e+03	1.199559e+03	1.745067e+03	2.747964e+03	3.211790e+02	9.858268e+02	3.901644e+02	7.848209e+02	4.147405e+02	2.083356e+02	9.356729e+02	1.536734e+03	2.010971e+03	1.079389e+03	1.668566e+03	6.550290e+02
6.520000e+02	8.481009e+03	3.607689e+03	1.144354e+03	1.747982e+03	2.805398e+03	2.230693e+02	9.848554e+02	3.382313e+02	8.142487e+02	3.301078e+02	1.314405e+02	9.418588e+02	1.616543e+03	2.105670e+03	1.091894e+03	1.713496e+03	5.975321e+02
6.530000e+02	8.422618e+03	3.521090e+03	1.071652e+03	1.725272e+03	2.800965e+03	1.356604e+02	9.579015e+02	2.815680e+02	8.236449e+02	2.480096e+02	6.479123e+01	9.351869e+02	1.660482e+03	2.163431e+03	1.070251e+03	1.730707e+03	5.263322e+02
6.540000e+02	8.237467e+03	3.380049e+03	9.877964e+02	1.681218e+03	2.739208e+03	6.537085e+01	9.111017e+02	2.249331e+02	8.137056e+02	1.740935e+02	1.434512e+01	9.183520e+02	1.666873e+03	2.179754e+03	1.019824e+03	1.719378e+03	4.483086e+02
6.550000e+02	7.950782e+03	3.197404e+03	8.986758e+02	1.620193e+03	2.630224e+03	1.522094e+01	8.519390e+02	1.724089e+02	7.864447e+02	1.122335e+02	-1.787473e+01	8.939225e+02	1.638067e+03	2.154509e+03	9.489512e+02	1.681268e+03	3.693536e+02
6.560000e+02	7.602187e+03	2.985355e+03	8.084316e+02	1.545296e+03	2.486454e+03	-1.573844e+01	7.873578e+02	1.266548e+02	7.447525e+02	6.368114e+01	-3.391357e+01	8.635138e+02	1.579206e+03	2.091015e+03	8.667770e+02	1.619673e+03	2.935626e+02
6.570000e+02	7.238476e+03	2.753503e+03	7.188643e+02	1.457886e+03	2.319790e+03	-3.181807e+01	7.224580e+02	8.848325e+01	6.918453e+02	2.702052e+01	-3.883744e+01	8.274990e+02	1.496719e+03	1.994798e+03	7.812963e+02	1.538489e+03	2.231199e+02
6.580000e+02	6.906492e+03	2.508929e+03	6.297358e+02	1.358188e+03	2.140027e+03	-3.926076e+01	6.601096e+02	5.693793e+01	6.309202e+02	-1.183365e+00	-3.897963e+01	7.853834e+02	1.397162e+03	1.872684e+03	6.981868e+02	1.441835e+03	1.588612e+02
6.590000e+02	6.646792e+03	2.258066e+03	5.399478e+02	1.246657e+03	1.954927e+03	-4.451922e+01	6.014591e+02	2.997631e+01	5.652493e+02	-2.530113e+01	-4.008457e+01	7.366777e+02	1.286734e+03	1.732368e+03	6.206770e+02	1.334245e+03	1.012692e+02
6.600000e+02	6.487946e+03	2.009154e+03	4.492199e+02	1.125464e+03	1.771261e+03	-5.275593e+01	5.469309e+02	5.634243e+00	4.986638e+02	-4.944405e+01	-4.588523e+01	6.818700e+02	1.171341e+03	1.582249e+03	5.502426e+02	1.221013e+03	5.148548e+01
6.610000e+02	6.441587e+03	1.773696e+03	3.595982e+02	9.993804e+02	1.595804e+03	-6.691503e+01	4.971645e+02	-1.672693e+01	4.360559e+02	-7.645831e+01	-5.744685e+01	6.230473e+02	1.056818e+03	1.431089e+03	4.876209e+02	1.108176e+03	1.186599e+01
6.620000e+02	6.499255e+03	1.565823e+03	2.760781e+02	8.755949e+02	1.435492e+03	-8.747707e+01	4.534273e+02	-3.563769e+01	3.833888e+02	-1.073117e+02	-7.334579e+01	5.638716e+02	9.489311e+02	1.287303e+03	4.335923e+02	1.001893e+03	-1.424834e+01
6.630000e+02	6.632735e+03	1.399479e+03	2.059226e+02	7.624551e+02	1.296555e+03	-1.127868e+02	4.173399e+02	-4.764048e+01	3.468681e+02	-1.409468e+02	-9.050235e+01	5.088853e+02	8.529480e+02	1.157994e+03	3.891794e+02	9.073689e+02	-2.356936e+01
6.640000e+02	6.798972e+03	1.284391e+03	1.567819e+02	6.675738e+02	1.183058e+03	-1.397177e+02	3.900855e+02	-4.839685e+01	3.313447e+02	-1.745642e+02	-1.053156e+02	4.623894e+02	7.728805e+02	1.048047e+03	3.552384e+02	8.278141e+02	-1.435585e+01
6.650000e+02	6.949012e+03	1.222462e+03	1.342478e+02	5.959676e+02	1.095615e+03	-1.644317e+02	3.715133e+02	-3.442224e+01	3.384811e+02	-2.042348e+02	-1.147054e+02	4.272932e+02	7.106651e+02	9.596085e+02	3.317097e+02	7.639012e+02	1.225796e+01
6.660000e+02	7.038605e+03	1.206089e+03	1.397550e+02	5.488793e+02	1.030930e+03	-1.830751e+02	3.596075e+02	-4.775466e+00	3.654652e+02	-2.257117e+02	-1.167614e+02	4.043456e+02	6.656340e+02	8.920447e+02	3.169706e+02	7.139574e+02	5.174261e+01
6.670000e+02	7.037307e+03	1.219278e+03	1.696423e+02	5.236757e+02	9.825065e+02	-1.923470e+02	3.506631e+02	3.799298e+01	4.049358e+02	-2.352948e+02	-1.108882e+02	3.920242e+02	6.345585e+02	8.423623e+02	3.077153e+02	6.747908e+02	9.683069e+01
6.680000e+02	6.933542e+03	1.241360e+03	2.157546e+02	5.148344e+02	9.423797e+02	-1.899294e+02	3.402366e+02	8.804868e+01	4.463355e+02	-2.305821e+02	-9.754280e+01	3.871270e+02	6.123728e+02	8.059345e+02	2.995842e+02	6.427966e+02	1.392458e+02
6.690000e+02	6.734679e+03	1.252208e+03	2.673950e+02	5.156530e+02	9.033484e+02	-1.747660e+02	3.246037e+02	1.375977e+02	4.783380e+02	-2.109440e+02	-7.779013e+01	3.858545e+02	5.934394e+02	7.773964e+02	2.884263e+02	6.149243e+02	1.719309e+02
6.700000e+02	6.462911e+03	1.237281e+03	3.139625e+02	5.200733e+02	8.609382e+02	-1.471564e+02	3.021972e+02	1.788658e+02	4.915699e+02	-1.776082e+02	-5.291659e+01	3.849752e+02	5.729864e+02	7.515530e+02	2.717462e+02	5.891945e+02	1.909599e+02
6.710000e+02	6.148628e+03	1.190908e+03	3.474088e+02	5.239937e+02	8.143936e+02	-1.086396e+02	2.744316e+02	2.060490e+02	4.807577e+02	-1.333496e+02	-2.424179e+01	3.826318e+02	5.482318e+02	7.241276e+02	2.497226e+02	5.646734e+02	1.964126e+02
6.720000e+02	5.823222e+03	1.116787e+03	3.637739e+02	5.256689e+02	7.663346e+02	-6.169111e+01	2.455163e+02	2.166012e+02	4.456751e+02	-8.190182e+01	6.872769e+00	3.784929e+02	5.187918e+02	6.921894e+02	2.253066e+02	5.410294e+02	1.918944e+02
6.730000e+02	5.512832e+03	1.025704e+03	3.634277e+02	5.251845e+02	7.212345e+02	-9.315155e+00	2.212548e+02	2.114968e+02	3.907111e+02	-2.728395e+01	3.893213e+01	3.732489e+02	4.862471e+02	6.541848e+02	2.032870e+02	5.179476e+02	1.829096e+02
6.740000e+02	5.234114e+03	9.313830e+02	3.501041e+02	5.233744e+02	6.833591e+02	4.535580e+01	2.072495e+02	1.944823e+02	3.233352e+02	2.676866e+01	7.027686e+01	3.677463e+02	4.530913e+02	6.096491e+02	1.886631e+02	4.946945e+02	1.747291e+02
6.750000e+02	4.992659e+03	8.459951e+02	3.291857e+02	5.207425e+02	6.550034e+02	9.935983e+01	2.071771e+02	1.706584e+02	2.520299e+02	7.715591e+01	9.919665e+01	3.622074e+02	4.215389e+02	5.588104e+02	1.849735e+02	4.700264e+02	1.705468e+02
6.760000e+02	4.784204e+03	7.768106e+02	3.058567e+02	5.168548e+02	6.356692e+02	1.500582e+02	2.217419e+02	1.449132e+02	1.843293e+02	1.215279e+02	1.241636e+02	3.559025e+02	3.926838e+02	5.023104e+02	1.932116e+02	4.424521e+02	1.705509e+02
6.770000e+02	4.598176e+03	7.248931e+02	2.836746e+02	5.103562e+02	6.223512e+02	1.951514e+02	2.485976e+02	1.207060e+02	1.254607e+02	1.582148e+02	1.440690e+02	3.473783e+02	3.662799e+02	4.411431e+02	2.116605e+02	4.106833e+02	1.721367e+02
6.780000e+02	4.422505e+03	6.858942e+02	2.638873e+02	4.994335e+02	6.106081e+02	2.326143e+02	2.831274e+02	9.951770e+01	7.782921e+01	1.860592e+02	1.583331e+02	3.350549e+02	3.410938e+02	3.767343e+02	2.365715e+02	3.740275e+02	1.710475e+02
6.790000e+02	4.248292e+03	6.523265e+02	2.455744e+02	4.823978e+02	5.958660e+02	2.606389e+02	3.197075e+02	8.103909e+01	4.132224e+01	2.042533e+02	1.668399e+02	3.178543e+02	3.155524e+02	3.109775e+02	2.633207e+02	3.325348e+02	1.629435e+02
6.800000e+02	4.073037e+03	6.164200e+02	2.265026e+02	4.581676e+02	5.745205e+02	2.776934e+02	3.530361e+02	6.393651e+01	1.421509e+01	2.122885e+02	1.697763e+02	2.955948e+02	2.883872e+02	2.460982e+02	2.876296e+02	2.868798e+02	1.448528e+02
6.810000e+02	3.901647e+03	5.727819e+02	2.044581e+02	4.266552e+02	5.447033e+02	2.827758e+02	3.792457e+02	4.689268e+01	-5.636207e+00	2.100948e+02	1.675453e+02	2.690847e+02	2.591071e+02	1.843745e+02	3.065631e+02	2.381291e+02	1.161154e+02
6.820000e+02	3.745194e+03	5.203320e+02	1.787096e+02	3.891756e+02	5.067969e+02	2.758500e+02	3.966624e+02	2.956532e+01	-1.965693e+01	1.983664e+02	1.608870e+02	2.400279e+02	2.282870e+02	1.278765e+02	3.191771e+02	1.876093e+02	7.866168e+01
6.830000e+02	3.617978e+03	4.631610e+02	1.511440e+02	3.488860e+02	4.637410e+02	2.583174e+02	4.061272e+02	1.314045e+01	-2.779207e+01	1.789353e+02	1.511891e+02	2.108803e+02	1.976961e+02	7.839106e+01	3.267435e+02	1.369882e+02	3.665609e+01
6.840000e+02	3.533789e+03	4.100557e+02	1.265919e+02	3.110054e+02	4.209619e+02	2.332672e+02	4.107752e+02	2.741163e-01	-2.836621e+01	1.549567e+02	1.407828e+02	1.846864e+02	1.702223e+02	3.755732e+01	3.324630e+02	8.849127e+01	-4.355372e+00
6.850000e+02	3.502284e+03	3.726216e+02	1.120328e+02	2.824265e+02	3.856341e+02	2.052694e+02	4.151917e+02	-5.588316e+00	-1.864892e+01	1.306798e+02	1.329413e+02	1.648045e+02	1.494848e+02	7.070854e+00	3.406006e+02	4.502768e+01	-3.858956e+01
6.860000e+02	3.526220e+03	3.623310e+02	1.147723e+02	2.704834e+02	3.651545e+02	1.796365e+02	4.240455e+02	-1.294894e+00	4.028098e+00	1.107417e+02	1.313982e+02	1.544155e+02	1.390847e+02	-1.125981e+01	3.551495e+02	1.000120e+01	-6.120041e+01
6.870000e+02	3.600061e+03	3.873133e+02	1.401551e+02	2.810780e+02	3.651506e+02	1.613354e+02	4.405692e+02	1.492327e+01	4.098744e+01	9.916478e+01	1.394490e+02	1.558452e+02	1.416282e+02	-1.574870e+01	3.783976e+02	-1.324896e+01	-6.918836e+01
6.880000e+02	3.710199e+03	4.499542e+02	1.896671e+02	3.167926e+02	3.877359e+02	1.539178e+02	4.654429e+02	4.276996e+01	9.124009e+01	9.842377e+01	1.589474e+02	1.698944e+02	1.578441e+02	-5.335312e+00	4.099482e+02	-2.221247e+01	-6.180499e+01
6.890000e+02	3.836776e+03	5.461302e+02	2.601637e+02	3.757624e+02	4.307737e+02	1.588564e+02	4.965600e+02	7.985515e+01	1.512085e+02	1.089517e+02	1.896066e+02	1.954526e+02	1.861544e+02	1.982552e+01	4.466550e+02	-1.587995e+01	-4.038451e+01
6.900000e+02	3.956791e+03	6.662328e+02	3.444966e+02	4.517980e+02	4.884879e+02	1.754966e+02	5.297859e+02	1.222861e+02	2.152297e+02	1.292632e+02	2.289068e+02	2.295862e+02	2.228897e+02	5.792852e+01	4.835524e+02	4.938075e+00	-7.757005e+00
6.910000e+02	4.047894e+03	7.974159e+02	4.332255e+02	5.357227e+02	5.531309e+02	2.015597e+02	5.603655e+02	1.656020e+02	2.766293e+02	1.565923e+02	2.726564e+02	2.680981e+02	2.630648e+02	1.054293e+02	5.153981e+02	3.773628e+01	3.245459e+01
6.920000e+02	4.092105e+03	9.261304e+02	5.167212e+02	6.173986e+02	6.169468e+02	2.339228e+02	5.843550e+02	2.056905e+02	3.289837e+02	1.877337e+02	3.159892e+02	3.063669e+02	3.014080e+02	1.573754e+02	5.381660e+02	7.878501e+01	7.637670e+01
6.930000e+02	4.078675e+03	1.040148e+03	5.869372e+02	6.877215e+02	6.736452e+02	2.693345e+02	5.995056e+02	2.394035e+02	3.671999e+02	2.197336e+02	3.544295e+02	3.401871e+02	3.332906e+02	2.080946e+02	5.499048e+02	1.237449e+02	1.201617e+02
6.940000e+02	4.005505e+03	1.129718e+03	6.383887e+02	7.399940e+02	7.189737e+02	3.048266e+02	6.053569e+02	2.647675e+02	3.881771e+02	2.502080e+02	3.846739e+02	3.663725e+02	3.553189e+02	2.520764e+02	5.507383e+02	1.682399e+02	1.600853e+02
6.950000e+02	3.878898e+03	1.187928e+03	6.682561e+02	7.704205e+02	7.504785e+02	3.377689e+02	6.026873e+02	2.808367e+02	3.909804e+02	2.772724e+02	4.048815e+02	3.830010e+02	3.655379e+02	2.848253e+02	5.421908e+02	2.082920e+02	1.926306e+02
6.960000e+02	3.711825e+03	1.210560e+03	6.758406e+02	7.778161e+02	7.668620e+02	3.656868e+02	5.926991e+02	2.873450e+02	3.765926e+02	2.992450e+02	4.144807e+02	3.893206e+02	3.633344e+02	3.034888e+02	5.262573e+02	2.406086e+02	2.146619e+02
6.970000e+02	3.521283e+03	1.195724e+03	6.617766e+02	7.628713e+02	7.673814e+02	3.860677e+02	5.763242e+02	2.843497e+02	3.474072e+02	3.143666e+02	4.136824e+02	3.854447e+02	3.491879e+02	3.071426e+02	5.046232e+02	2.627614e+02	2.236674e+02
6.980000e+02	3.325499e+03	1.143557e+03	6.274292e+02	7.274039e+02	7.515631e+02	3.963797e+02	5.538896e+02	2.720503e+02	3.066717e+02	3.207549e+02	4.029997e+02	3.720254e+02	3.244033e+02	2.967402e+02	4.782650e+02	2.733005e+02	2.179779e+02
6.990000e+02	3.141666e+03	1.056160e+03	5.747729e+02	6.739538e+02	7.193069e+02	3.944301e+02	5.252064e+02	2.508953e+02	2.580752e+02	3.166954e+02	3.830379e+02	3.500766e+02	2.909150e+02	2.748294e+02	4.474720e+02	2.718362e+02	1.968927e+02
7.000000e+02	2.984586e+03	9.378778e+02	5.067832e+02	6.058614e+02	6.713105e+02	3.790141e+02	4.900123e+02	2.219477e+02	2.055684e+02	3.012126e+02	3.546636e+02	3.210262e+02	2.511968e+02	2.451678e+02	4.122113e+02	2.590997e+02	1.607218e+02
7.010000e+02	2.866095e+03	7.957809e+02	4.280645e+02	5.276778e+02	6.096610e+02	3.506248e+02	4.486061e+02	1.873207e+02	1.533527e+02	2.747097e+02	3.194303e+02	2.869340e+02	2.082463e+02	2.123211e+02	3.726916e+02	2.369692e+02	1.107930e+02
7.020000e+02	2.794871e+03	6.399379e+02	3.452266e+02	4.455125e+02	5.383557e+02	3.118736e+02	4.024399e+02	1.503959e+02	1.058492e+02	2.393753e+02	2.799578e+02	2.506814e+02	1.655531e+02	1.812488e+02	3.299423e+02	2.084125e+02	4.943453e+01
7.030000e+02	2.776202e+03	4.829606e+02	2.665467e+02	3.668685e+02	4.634542e+02	2.673122e+02	3.544051e+02	1.155898e+02	6.745477e+01	1.990899e+02	2.399298e+02	2.159104e+02	1.269365e+02	1.568345e+02	2.861837e+02	1.772692e+02	-2.014406e+01
7.040000e+02	2.811625e+03	3.384566e+02	2.007468e+02	2.997085e+02	3.925934e+02	2.225448e+02	3.086031e+02	8.762271e+01	4.201865e+01	1.587261e+02	2.035337e+02	1.865825e+02	9.617188e+01	1.433335e+02	2.447854e+02	1.478065e+02	-9.418987e+01
7.050000e+02	2.898702e+03	2.185192e+02	1.551433e+02	2.508710e+02	3.337846e+02	1.828289e+02	2.695645e+02	7.048787e+01	3.215056e+01	1.229906e+02	1.744444e+02	1.662128e+02	7.642284e+01	1.437818e+02	2.097274e+02	1.240555e+02	-1.690047e+02
7.060000e+02	3.031309e+03	1.309639e+02	1.337879e+02	2.243382e+02	2.937196e+02	1.516302e+02	2.411234e+02	6.647234e+01	3.860439e+01	9.518106e+01	1.547240e+02	1.570192e+02	6.960963e+01	1.594729e+02	1.846756e+02	1.090419e+02	-2.416574e+02
7.070000e+02	3.200553e+03	7.738623e+01	1.363088e+02	2.200393e+02	2.761088e+02	1.296943e+02	2.253455e+02	7.557373e+01	5.998008e+01	7.632582e+01	1.441108e+02	1.593005e+02	7.592341e+01	1.896373e+02	1.719783e+02	1.041278e+02	-3.104821e+02
7.080000e+02	3.395951e+03	5.299611e+01	1.579441e+02	2.337451e+02	2.806694e+02	1.150453e+02	2.219430e+02	9.549627e+01	9.286828e+01	6.507236e+01	1.400598e+02	1.712938e+02	9.368009e+01	2.314183e+02	1.719715e+02	1.086942e+02	-3.750069e+02
7.090000e+02	3.606364e+03	4.855226e+01	1.908143e+02	2.582045e+02	3.032015e+02	1.039706e+02	2.284381e+02	1.221935e+02	1.323979e+02	5.841211e+01	1.385952e+02	1.895812e+02	1.196045e+02	2.801761e+02	1.828810e+02	1.203155e+02	-4.351765e+02
7.100000e+02	3.820408e+03	5.383167e+01	2.260257e+02	2.851845e+02	3.367997e+02	9.264690e+01	2.410355e+02	1.507590e+02	1.730276e+02	5.299306e+01	1.356949e+02	2.099166e+02	1.494857e+02	3.300889e+02	2.013831e+02	1.354102e+02	-4.901232e+02
7.110000e+02	4.026687e+03	6.135886e+01	2.559238e+02	3.077199e+02	3.738297e+02	7.878697e+01	2.558834e+02	1.764105e+02	2.093922e+02	4.652600e+01	1.286965e+02	2.282070e+02	1.790209e+02	3.749886e+02	2.236238e+02	1.501980e+02	-5.370959e+02
7.120000e+02	4.214612e+03	6.895783e+01	2.758156e+02	3.218234e+02	4.080465e+02	6.267235e+01	2.702636e+02	1.953530e+02	2.370590e+02	3.875050e+01	1.172043e+02	2.413630e+02	2.046182e+02	4.093305e+02	2.463429e+02	1.616942e+02	-5.712240e+02
7.130000e+02	4.376328e+03	8.016654e+01	2.847225e+02	3.271447e+02	4.362234e+02	4.719089e+01	2.833208e+02	2.053829e+02	2.531072e+02	3.160906e+01	1.031858e+02	2.478089e+02	2.239597e+02	4.291553e+02	2.677399e+02	1.684731e+02	-5.864772e+02
7.140000e+02	4.509344e+03	1.024243e+02	2.850649e+02	3.264711e+02	4.588535e+02	3.689739e+01	2.961457e+02	2.061579e+02	2.564659e+02	2.859290e+01	9.026569e+01	2.475689e+02	2.362077e+02	4.328275e+02	2.878419e+02	1.710005e+02	-5.776139e+02
7.150000e+02	4.618495e+03	1.437874e+02	2.814743e+02	3.243364e+02	4.797652e+02	3.647924e+01	3.112634e+02	1.990891e+02	2.479437e+02	3.352485e+01	8.251878e+01	2.419568e+02	2.418211e+02	4.213070e+02	3.083095e+02	1.714442e+02	-5.423898e+02
7.160000e+02	4.715537e+03	2.093997e+02	2.791191e+02	3.252334e+02	5.047767e+02	4.918610e+01	3.317428e+02	1.868576e+02	2.298984e+02	4.921558e+01	8.319666e+01	2.329775e+02	2.420410e+02	3.977825e+02	3.317725e+02	1.729926e+02	-4.831088e+02
7.170000e+02	4.815491e+03	2.989381e+02	2.820171e+02	3.319801e+02	5.397500e+02	7.573268e+01	3.601948e+02	1.726370e+02	2.055833e+02	7.642937e+01	9.378781e+01	2.226051e+02	2.381969e+02	3.666985e+02	3.608914e+02	1.788473e+02	-4.068296e+02
7.180000e+02	4.930524e+03	4.058753e+02	2.918157e+02	3.447182e+02	5.885840e+02	1.139712e+02	3.979039e+02	1.592301e+02	1.783482e+02	1.134639e+02	1.136484e+02	2.121369e+02	2.310743e+02	3.324782e+02	3.973964e+02	1.911768e+02	-3.240532e+02
7.190000e+02	5.063708e+03	5.188292e+02	3.074379e+02	3.608592e+02	6.517473e+02	1.593669e+02	4.442724e+02	1.484094e+02	1.509823e+02	1.564528e+02	1.402426e+02	2.018339e+02	2.206207e+02	2.984235e+02	4.413579e+02	2.103794e+02	-2.462599e+02
7.200000e+02	5.205468e+03	6.246380e+02	3.257538e+02	3.760330e+02	7.258278e+02	2.060850e+02	4.966804e+02	1.407165e+02	1.254596e+02	2.002919e+02	1.698601e+02	1.909979e+02	2.061764e+02	2.662379e+02	4.908868e+02	2.349318e+02	-1.830232e+02
7.210000e+02	5.334619e+03	7.122042e+02	3.430606e+02	3.857513e+02	8.042484e+02	2.483468e+02	5.507865e+02	1.357914e+02	1.031533e+02	2.399055e+02	1.985623e+02	1.784831e+02	1.871917e+02	2.363334e+02	5.423444e+02	2.618957e+02	-1.395599e+02
7.220000e+02	5.423948e+03	7.757546e+02	3.567589e+02	3.871724e+02	8.788675e+02	2.816571e+02	6.012025e+02	1.330321e+02	8.531288e+01	2.714445e+02	2.230599e+02	1.634456e+02	1.641143e+02	2.086939e+02	5.909892e+02	2.878709e+02	-1.154772e+02
7.230000e+02	5.448460e+03	8.161993e+02	3.664339e+02	3.802244e+02	9.418591e+02	3.035461e+02	6.423965e+02	1.322032e+02	7.342176e+01	2.930107e+02	2.412595e+02	1.459927e+02	1.389654e+02	1.837866e+02	6.318602e+02	3.099924e+02	-1.052059e+02
7.240000e+02	5.393443e+03	8.398908e+02	3.737695e+02	3.675500e+02	9.872262e+02	3.136395e+02	6.696394e+02	1.336302e+02	6.910775e+01	3.046604e+02	2.523439e+02	1.274089e+02	1.152054e+02	1.630124e+02	6.606591e+02	3.265612e+02	-1.001522e+02
7.250000e+02	5.259794e+03	8.551644e+02	3.812972e+02	3.532658e+02	1.011569e+03	3.131155e+02	6.798222e+02	1.378704e+02	7.355746e+01	3.077383e+02	2.564396e+02	1.098364e+02	9.682417e+01	1.484702e+02	6.744437e+02	3.371202e+02	-9.200212e+01
7.260000e+02	5.065230e+03	8.681304e+02	3.906268e+02	3.411148e+02	1.014146e+03	3.038559e+02	6.720181e+02	1.450831e+02	8.673052e+01	3.038948e+02	2.541058e+02	9.556776e+01	8.700565e+01	1.421973e+02	6.720556e+02	3.420851e+02	-7.607011e+01
7.270000e+02	4.841387e+03	8.796839e+02	4.011453e+02	3.329310e+02	9.965561e+02	2.877150e+02	6.477252e+02	1.545372e+02	1.068582e+02	2.942855e+02	2.459544e+02	8.631907e+01	8.697214e+01	1.453226e+02	6.542943e+02	3.422573e+02	-5.336102e+01
7.280000e+02	4.627924e+03	8.852453e+02	4.099706e+02	3.281850e+02	9.624241e+02	2.662426e+02	6.107669e+02	1.646435e+02	1.306156e+02	2.793533e+02	2.326231e+02	8.285370e+01	9.555650e+01	1.575812e+02	6.238761e+02	3.385438e+02	-3.036678e+01
7.290000e+02	4.465212e+03	8.774776e+02	4.132991e+02	3.248280e+02	9.172133e+02	2.409384e+02	5.668595e+02	1.736013e+02	1.540204e+02	2.592768e+02	2.151214e+02	8.512599e+01	1.097005e+02	1.774077e+02	5.851964e+02	3.320129e+02	-1.649424e+01
7.300000e+02	4.387247e+03	8.507639e+02	4.085331e+02	3.209779e+02	8.680317e+02	2.138110e+02	5.228774e+02	1.803774e+02	1.737201e+02	2.348109e+02	1.953331e+02	9.281804e+01	1.256381e+02	2.025183e+02	5.438759e+02	3.241518e+02	-2.007058e+01
7.310000e+02	4.415996e+03	8.053148e+02	3.961345e+02	3.165618e+02	8.231038e+02	1.878284e+02	4.858761e+02	1.855012e+02	1.881078e+02	2.080242e+02	1.763293e+02	1.059248e+02	1.402257e+02	2.306631e+02	5.060705e+02	3.170292e+02	-4.456798e+01
7.320000e+02	4.557925e+03	7.488838e+02	3.802338e+02	3.140573e+02	7.906606e+02	1.668765e+02	4.619720e+02	1.911946e+02	1.977574e+02	1.824737e+02	1.621838e+02	1.250150e+02	1.518669e+02	2.601911e+02	4.775677e+02	3.130885e+02	-8.664876e+01
7.330000e+02	4.802885e+03	6.951366e+02	3.675901e+02	3.179079e+02	7.772740e+02	1.550734e+02	4.552272e+02	2.006495e+02	2.049708e+02	1.626163e+02	1.571898e+02	1.509650e+02	1.607120e+02	2.901969e+02	4.627685e+02	3.145006e+02	-1.368509e+02
7.340000e+02	5.125194e+03	6.592107e+02	3.652341e+02	3.328065e+02	7.860046e+02	1.556043e+02	4.667327e+02	2.166653e+02	2.126218e+02	1.526090e+02	1.646515e+02	1.842364e+02	1.681497e+02	3.202270e+02	4.637357e+02	3.222633e+02	-1.825988e+02
7.350000e+02	5.486642e+03	6.522133e+02	3.777050e+02	3.615317e+02	8.149763e+02	1.694947e+02	4.941101e+02	2.401776e+02	2.227764e+02	1.549251e+02	1.856507e+02	2.240040e+02	1.758767e+02	3.497160e+02	4.795386e+02	3.354313e+02	-2.122886e+02
7.360000e+02	5.841254e+03	6.768142e+02	4.049534e+02	4.031967e+02	8.569949e+02	1.948074e+02	5.316250e+02	2.692933e+02	2.356501e+02	1.692997e+02	2.182496e+02	2.675374e+02	1.849440e+02	3.774290e+02	5.061151e+02	3.508727e+02	-2.188731e+02
7.370000e+02	6.141727e+03	7.255975e+02	4.417066e+02	4.525905e+02	9.005673e+02	2.266142e+02	5.710056e+02	2.992713e+02	2.493040e+02	1.923990e+02	2.574667e+02	3.101569e+02	1.951219e+02	4.011797e+02	5.367879e+02	3.637715e+02	-2.017301e+02
7.380000e+02	6.347152e+03	7.827372e+02	4.785306e+02	5.008794e+02	9.322341e+02	2.578265e+02	6.029046e+02	3.235237e+02	2.601732e+02	2.183540e+02	2.961025e+02	3.458751e+02	2.047761e+02	4.179830e+02	5.634293e+02	3.687963e+02	-1.663765e+02
7.390000e+02	6.431032e+03	8.283723e+02	5.042315e+02	5.374836e+02	9.396714e+02	2.806860e+02	6.187581e+02	3.353310e+02	2.642074e+02	2.400209e+02	3.262171e+02	3.685863e+02	2.112666e+02	4.246417e+02	5.780901e+02	3.615723e+02	-1.224038e+02
7.400000e+02	6.387831e+03	8.442050e+02	5.088313e+02	5.525920e+02	9.147287e+02	2.885197e+02	6.126524e+02	3.297097e+02	2.582008e+02	2.506276e+02	3.408674e+02	3.734737e+02	2.117252e+02	4.185909e+02	5.747571e+02	3.399621e+02	-8.052845e+01
7.410000e+02	6.236062e+03	8.185589e+02	4.862271e+02	5.396139e+02	8.555446e+02	2.772993e+02	5.827440e+02	3.048330e+02	2.408561e+02	2.453685e+02	3.356556e+02	3.582228e+02	2.039588e+02	3.987236e+02	5.508101e+02	3.047251e+02	-4.977954e+01
7.420000e+02	6.016428e+03	7.493942e+02	4.357983e+02	4.968936e+02	7.671299e+02	2.466014e+02	5.318303e+02	2.625783e+02	2.132558e+02	2.225405e+02	3.097066e+02	3.236758e+02	1.871870e+02	3.658991e+02	5.077662e+02	2.593547e+02	-3.563089e+01
7.430000e+02	5.784789e+03	6.444471e+02	3.625698e+02	4.282200e+02	6.602343e+02	1.997295e+02	4.668394e+02	2.080792e+02	1.786284e+02	1.839398e+02	2.658465e+02	2.737305e+02	1.623726e+02	3.229437e+02	4.510464e+02	2.091800e+02	-3.948858e+01
7.440000e+02	5.601249e+03	5.185507e+02	2.759880e+02	3.420240e+02	5.488092e+02	1.429801e+02	3.972865e+02	1.484929e+02	1.415392e+02	1.344475e+02	2.099687e+02	2.145287e+02	1.320532e+02	2.741340e+02	3.887507e+02	1.600522e+02	-5.948531e+01
7.450000e+02	5.517749e+03	3.890818e+02	1.877851e+02	2.495764e+02	4.467997e+02	8.428384e+01	3.330586e+02	9.142702e+01	1.068179e+02	8.096626e+01	1.497944e+02	1.532169e+02	9.977869e+01	2.243581e+02	3.297378e+02	1.170579e+02	-9.213093e+01
7.460000e+02	5.567127e+03	2.711005e+02	1.096693e+02	1.628346e+02	3.652178e+02	3.163583e+01	2.821278e+02	4.354625e+01	7.861034e+01	3.105818e+01	9.340993e+01	9.670921e+01	6.942013e+01	1.782796e+02	2.815469e+02	8.366943e+01	-1.341128e+02
7.470000e+02	5.756344e+03	1.738580e+02	5.156315e+01	9.265496e+01	3.103468e+02	-8.218842e+00	2.488545e+02	9.748003e+00	5.986372e+01	-8.301249e+00	4.800457e+01	5.083694e+01	4.464493e+01	1.398129e+02	2.487688e+02	6.157925e+01	-1.835133e+02
7.480000e+02	6.065806e+03	9.982693e+01	2.079805e+01	4.782954e+01	2.835099e+02	-3.051897e+01	2.333543e+02	-6.979318e+00	5.234659e+01	-3.154924e+01	1.910725e+01	2.004926e+01	2.871629e+01	1.120328e+02	2.323207e+02	5.119310e+01	-2.399500e+02
7.490000e+02	6.455217e+03	4.639005e+01	2.216662e+01	3.490344e+01	2.822197e+02	-3.259143e+01	2.320399e+02	-5.217719e+00	5.703859e+01	-3.487271e+01	1.035936e+01	7.516606e+00	2.453804e+01	9.738045e+01	2.297554e+02	5.247054e+01	-3.035925e+02
7.500000e+02	6.874483e+03	9.190527e+00	5.828266e+01	5.826181e+01	3.019819e+02	-1.357436e+01	2.390509e+02	1.528732e+01	7.452576e+01	-1.624383e+01	2.359171e+01	1.526475e+01	3.466450e+01	9.781722e+01	2.363782e+02	6.561178e+01	-3.735179e+02
7.510000e+02	7.276317e+03	-1.459377e+01	1.295449e+02	1.198174e+02	3.378191e+02	2.583718e+01	2.480183e+02	5.369861e+01	1.050161e+02	2.452815e+01	5.884966e+01	4.397046e+01	6.096307e+01	1.145748e+02	2.467062e+02	9.112238e+01	-4.462217e+02
7.520000e+02	7.626274e+03	-2.473455e+01	2.332916e+02	2.179328e+02	3.848450e+02	8.330711e+01	2.535904e+02	1.076649e+02	1.477941e+02	8.549714e+01	1.141222e+02	9.230638e+01	1.038071e+02	1.473837e+02	2.557775e+02	1.290780e+02	-5.151228e+02
7.530000e+02	7.906827e+03	-1.896741e+01	3.623741e+02	3.458577e+02	4.378411e+02	1.544278e+02	2.523372e+02	1.726219e+02	2.002929e+02	1.620813e+02	1.848397e+02	1.561067e+02	1.610159e+02	1.934456e+02	2.599879e+02	1.778646e+02	-5.715133e+02
7.540000e+02	8.114638e+03	4.073094e+00	5.040363e+02	4.906046e+02	4.904408e+02	2.323006e+02	2.429593e+02	2.413442e+02	2.573011e+02	2.467359e+02	2.635361e+02	2.279144e+02	2.270679e+02	2.467354e+02	2.573921e+02	2.330609e+02	-6.067525e+02
7.550000e+02	8.253270e+03	4.174498e+01	6.402469e+02	6.333934e+02	5.348275e+02	3.076807e+02	2.259845e+02	3.043202e+02	3.109307e+02	3.293175e+02	3.402014e+02	2.974691e+02	2.931927e+02	2.982566e+02	2.476188e+02	2.872214e+02	-6.148726e+02
7.560000e+02	8.325531e+03	8.608753e+01	7.502123e+02	7.523429e+02	5.625988e+02	3.700981e+02	2.032439e+02	3.512222e+02	3.517379e+02	3.984764e+02	4.036543e+02	3.533554e+02	3.486904e+02	3.375474e+02	2.316197e+02	3.309923e+02	-5.945025e+02
7.570000e+02	8.329260e+03	1.253760e+02	8.148077e+02	8.270865e+02	5.667632e+02	4.099132e+02	1.773744e+02	3.732120e+02	3.708666e+02	4.439436e+02	4.437851e+02	3.854933e+02	3.833039e+02	3.551620e+02	2.114022e+02	3.553744e+02	-5.492939e+02
7.580000e+02	8.258012e+03	1.480381e+02	8.215829e+02	8.439449e+02	5.440959e+02	4.207217e+02	1.514458e+02	3.653301e+02	3.625433e+02	4.590427e+02	4.540188e+02	3.876943e+02	3.899291e+02	3.453200e+02	1.897641e+02	3.543452e+02	-4.867281e+02
7.590000e+02	8.105227e+03	1.470846e+02	7.684555e+02	7.997750e+02	4.967411e+02	4.012094e+02	1.286809e+02	3.280476e+02	3.259711e+02	4.424878e+02	4.330971e+02	3.593689e+02	3.666810e+02	3.077168e+02	1.699564e+02	3.267978e+02	-4.159120e+02
7.600000e+02	7.868947e+03	1.228804e+02	6.645561e+02	7.029728e+02	4.322066e+02	3.556714e+02	1.121775e+02	2.673324e+02	2.658448e+02	3.987150e+02	3.854669e+02	3.057505e+02	3.175091e+02	2.477646e+02	1.552181e+02	2.770011e+02	-3.453396e+02
7.610000e+02	7.554590e+03	8.295915e+01	5.278139e+02	5.711984e+02	3.616113e+02	2.929259e+02	1.045759e+02	1.931639e+02	1.912492e+02	3.365686e+02	3.200892e+02	2.365494e+02	2.511124e+02	1.751410e+02	1.482155e+02	2.134079e+02	-2.814180e+02
7.620000e+02	7.175078e+03	3.908863e+01	3.801660e+02	4.266516e+02	2.968072e+02	2.239928e+02	1.076815e+02	1.170260e+02	1.133394e+02	2.668308e+02	2.480930e+02	1.635126e+02	1.785622e+02	1.011798e+02	1.505164e+02	1.463027e+02	-2.280201e+02
7.630000e+02	6.749341e+03	3.046225e+00	2.421054e+02	2.905545e+02	2.474036e+02	1.593487e+02	1.221139e+02	4.922945e+01	4.262168e+01	1.994882e+02	1.800757e+02	9.767970e+01	1.104829e+02	3.601993e+01	1.622505e+02	8.516476e+01	-1.867964e+02
7.640000e+02	6.300659e+03	-1.709572e+01	1.282943e+02	1.785541e+02	2.186240e+02	1.066315e+02	1.470636e+02	-3.153250e+00	-1.331746e+01	1.416164e+02	1.238688e+02	4.710828e+01	5.469038e+01	-1.360026e+01	1.820457e+02	3.658984e+01	-1.577600e+02
7.650000e+02	5.855581e+03	-1.894689e+01	4.531083e+01	9.816745e+01	2.104783e+02	6.938293e+01	1.802213e+02	-3.729339e+01	-5.107676e+01	9.639247e+01	8.329130e+01	1.556594e+01	1.488253e+01	-4.536698e+01	2.072283e+02	3.261781e+00	-1.398038e+02
7.660000e+02	5.443061e+03	-5.781573e+00	-8.281068e+00	4.855974e+01	2.182370e+02	4.699312e+01	2.179184e+02	-5.450795e+01	-7.155865e+01	6.328257e+01	5.803242e+01	2.336872e+00	-9.464776e+00	-6.115492e+01	2.342055e+02	-1.595668e+01	-1.310963e+02
7.670000e+02	5.092862e+03	1.497688e+01	-4.002240e+01	2.226969e+01	2.338864e+02	3.565514e+01	2.554997e+02	-5.928762e+01	-7.912185e+01	3.910448e+01	4.449036e+01	3.009971e+00	-2.221114e+01	-6.580978e+01	2.589471e+02	-2.504893e+01	-1.294862e+02
7.680000e+02	4.832712e+03	3.402874e+01	-6.057407e+01	8.166205e+00	2.481649e+02	2.994192e+01	2.879298e+02	-5.779062e+01	-8.010075e+01	1.953170e+01	3.724285e+01	1.095670e+01	-2.906550e+01	-6.539939e+01	2.775179e+02	-2.934144e+01	-1.329968e+02
7.690000e+02	4.684513e+03	4.262439e+01	-8.042521e+01	-5.149136e+00	2.527966e+02	2.456318e+01	3.105876e+02	-5.614713e+01	-8.104556e+01	6.253250e-01	3.077036e+01	1.913750e+01	-3.590685e+01	-6.540422e+01	2.866484e+02	-3.384072e+01	-1.403105e+02
7.700000e+02	4.660588e+03	3.474372e+01	-1.069725e+02	-2.622710e+01	2.425289e+02	1.588263e+01	3.201366e+02	-5.890642e+01	-8.702376e+01	-1.994383e+01	2.104706e+01	2.184890e+01	-4.726019e+01	-6.926344e+01	2.843091e+02	-4.176980e+01	-1.510147e+02
7.710000e+02	4.761066e+03	8.692666e+00	-1.425605e+02	-5.858978e+01	2.165393e+02	2.845010e+00	3.152812e+02	-6.794822e+01	-1.003203e+02	-4.223542e+01	6.635729e+00	1.603364e+01	-6.521046e+01	-7.759933e+01	2.702001e+02	-5.365134e+01	-1.654327e+02
7.720000e+02	4.973056e+03	-3.224385e+01	-1.839348e+02	-9.996742e+01	1.787900e+02	-1.290267e+01	2.971889e+02	-8.212487e+01	-1.198473e+02	-6.408293e+01	-1.098916e+01	1.854636e+00	-8.896239e+01	-8.829557e+01	2.460083e+02	-6.721006e+01	-1.840644e+02
7.730000e+02	5.271723e+03	-8.037714e+01	-2.232709e+02	-1.431311e+02	1.371078e+02	-2.769845e+01	2.693982e+02	-9.774640e+01	-1.414542e+02	-8.181252e+01	-2.797713e+01	-1.759365e+01	-1.151376e+02	-9.738722e+01	2.152840e+02	-7.816941e+01	-2.068851e+02
7.740000e+02	5.623041e+03	-1.254060e+02	-2.505031e+02	-1.780648e+02	1.011423e+02	-3.711184e+01	2.371592e+02	-1.097740e+02	-1.590956e+02	-9.140371e+01	-3.932349e+01	-3.732237e+01	-1.387249e+02	-1.004681e+02	1.828676e+02	-8.172004e+01	-2.328437e+02
7.750000e+02	5.987944e+03	-1.569743e+02	-2.562290e+02	-1.947968e+02	7.977000e+01	-3.730563e+01	2.063259e+02	-1.133388e+02	-1.665300e+02	-8.969582e+01	-4.037101e+01	-5.189302e+01	-1.544097e+02	-9.413370e+01	1.539361e+02	-7.416251e+01	-2.598186e+02
7.760000e+02	6.327561e+03	-1.672097e+02	-2.342427e+02	-1.859918e+02	7.875679e+01	-2.603552e+01	1.820722e+02	-1.050783e+02	-1.590202e+02	-7.522002e+01	-2.809261e+01	-5.681396e+01	-1.578839e+02	-7.695972e+01	1.328883e+02	-5.412935e+01	-2.850809e+02
7.770000e+02	6.609108e+03	-1.524471e+02	-1.828963e+02	-1.485310e+02	9.940528e+01	-2.977968e+00	1.677734e+02	-8.386709e+01	-1.345033e+02	-4.839146e+01	-1.764045e+00	-4.948888e+01	-1.467530e+02	-4.971297e+01	1.223604e+02	-2.295431e+01	-3.060866e+02
7.780000e+02	6.811533e+03	-1.137098e+02	-1.049905e+02	-8.374265e+01	1.385128e+02	3.061598e+01	1.643280e+02	-5.078506e+01	-9.391207e+01	-1.107772e+01	3.709503e+01	-2.952533e+01	-1.208255e+02	-1.482343e+01	1.226348e+02	1.587795e+01	-3.212889e+02
7.790000e+02	6.929517e+03	-5.606268e+01	-6.512369e+00	3.496180e+00	1.894442e+02	7.263946e+01	1.700413e+02	-8.494211e+00	-4.067566e+01	3.416328e+01	8.533050e+01	1.524728e+00	-8.182429e+01	2.453503e+01	1.315656e+02	5.787809e+01	-3.306621e+02
7.800000e+02	6.974253e+03	1.263925e+01	1.050259e+02	1.061611e+02	2.437534e+02	1.207768e+02	1.810223e+02	3.958380e+01	2.027221e+01	8.475327e+01	1.389454e+02	4.072733e+01	-3.277666e+01	6.527565e+01	1.449992e+02	9.875381e+01	-3.357442e+02
7.810000e+02	6.969907e+03	8.304986e+01	2.218736e+02	2.163073e+02	2.927577e+02	1.727315e+02	1.919581e+02	8.989667e+01	8.353165e+01	1.383414e+02	1.937234e+02	8.433611e+01	2.258901e+01	1.047844e+02	1.575684e+02	1.351895e+02	-3.391768e+02
7.820000e+02	6.946004e+03	1.454341e+02	3.365585e+02	3.257492e+02	3.287487e+02	2.259769e+02	1.971422e+02	1.390090e+02	1.439878e+02	1.925705e+02	2.455314e+02	1.282026e+02	8.022037e+01	1.408103e+02	1.637363e+02	1.650140e+02	-3.438799e+02
7.830000e+02	6.927689e+03	1.907106e+02	4.417917e+02	4.262849e+02	3.458761e+02	2.772900e+02	1.916631e+02	1.835622e+02	1.971898e+02	2.446023e+02	2.903982e+02	1.680550e+02	1.358868e+02	1.711179e+02	1.589760e+02	1.869034e+02	-3.521104e+02
7.840000e+02	6.927121e+03	2.116948e+02	5.303035e+02	5.098823e+02	3.408971e+02	3.224983e+02	1.726265e+02	2.202232e+02	2.394975e+02	2.908073e+02	3.246101e+02	1.997984e+02	1.852702e+02	1.932854e+02	1.409364e+02	1.999661e+02	-3.646911e+02
7.850000e+02	6.939268e+03	2.045420e+02	5.951483e+02	5.692400e+02	3.138361e+02	3.567819e+02	1.401528e+02	2.458787e+02	2.682038e+02	3.269469e+02	3.450254e+02	2.199641e+02	2.242109e+02	2.049051e+02	1.103188e+02	2.035247e+02	-3.806605e+02
7.860000e+02	6.943868e+03	1.699448e+02	6.306468e+02	5.988095e+02	2.682983e+02	3.755769e+02	9.776481e+01	2.581267e+02	2.817395e+02	3.489105e+02	3.496158e+02	2.262811e+02	2.491891e+02	2.041557e+02	7.109963e+01	1.972079e+02	-3.974749e+02
7.870000e+02	6.912739e+03	1.134021e+02	6.336478e+02	5.959618e+02	2.110350e+02	3.757887e+02	5.183610e+01	2.558783e+02	2.798930e+02	3.537588e+02	3.380315e+02	2.181827e+02	2.579253e+02	1.904635e+02	2.980768e+01	1.812381e+02	-4.117158e+02
7.880000e+02	6.819494e+03	4.411449e+01	6.045098e+02	5.617723e+02	1.505622e+02	3.568218e+02	1.006928e+01	2.397568e+02	2.638744e+02	3.406400e+02	3.119013e+02	1.970092e+02	2.498662e+02	1.648966e+02	-6.110820e+00	1.566847e+02	-4.200696e+02
7.890000e+02	6.647890e+03	-2.729605e+01	5.472936e+02	5.010178e+02	9.512314e+01	3.209896e+02	-2.057524e+01	2.120614e+02	2.361019e+02	3.111965e+02	2.746633e+02	1.657758e+02	2.263503e+02	1.300932e+02	-3.036650e+01	1.255018e+02	-4.202338e+02
7.900000e+02	6.396167e+03	-9.139109e+01	4.690456e+02	4.213456e+02	5.073838e+01	2.731266e+02	-3.574269e+01	1.762803e+02	1.997422e+02	2.693079e+02	2.309358e+02	1.285715e+02	1.904067e+02	8.977084e+01	-3.955939e+01	9.030973e+01	-4.114286e+02
7.910000e+02	6.076790e+03	-1.417841e+02	3.784734e+02	3.319322e+02	2.015621e+01	2.195516e+02	-3.460173e+01	1.363606e+02	1.581818e+02	2.202958e+02	1.856358e+02	8.981183e+01	1.462945e+02	4.805566e+01	-3.385553e+01	5.402304e+01	-3.943589e+02
7.920000e+02	5.712917e+03	-1.756027e+02	2.845184e+02	2.420785e+02	3.108517e+00	1.667549e+02	-1.949222e+01	9.603483e+01	1.146300e+02	1.698922e+02	1.431327e+02	5.358875e+01	9.894528e+01	8.890725e+00	-1.635287e+01	1.947163e+01	-3.707077e+02
7.930000e+02	5.333573e+03	-1.926386e+02	1.952222e+02	1.600607e+02	-2.390237e+00	1.202117e+02	5.427544e+00	5.841528e+01	7.194358e+01	1.232817e+02	1.066579e+02	2.324923e+01	5.340364e+01	-2.434704e+01	8.499593e+00	-1.088090e+01	-3.424290e+02
7.940000e+02	4.969022e+03	-1.939395e+02	1.170086e+02	9.230545e+01	1.522450e+00	8.359959e+01	3.582747e+01	2.588685e+01	3.260179e+01	8.440943e+01	7.804369e+01	1.180748e+00	1.426395e+01	-4.905516e+01	3.663932e+01	-3.510941e+01	-3.111632e+02
7.950000e+02	4.646900e+03	-1.807624e+02	5.426828e+01	4.280379e+01	1.355327e+01	5.849988e+01	6.839829e+01	1.607496e-01	-1.328639e+00	5.559909e+01	5.773691e+01	-1.130508e+01	-1.492959e+01	-6.355970e+01	6.549943e+01	-5.194026e+01	-2.780026e+02
7.960000e+02	4.389058e+03	-1.544296e+02	9.100168e+00	1.271733e+01	3.325191e+01	4.452517e+01	1.011871e+02	-1.768691e+01	-2.834767e+01	3.744960e+01	4.499172e+01	-1.406946e+01	-3.226953e+01	-6.729826e+01	9.411334e+01	-6.085712e+01	-2.436514e+02
7.970000e+02	4.209151e+03	-1.169844e+02	-1.879466e+01	2.881130e-01	6.018461e+01	3.974998e+01	1.331673e+02	-2.728258e+01	-4.776248e+01	2.896925e+01	3.817980e+01	-8.197921e+00	-3.788560e+01	-6.100148e+01	1.223882e+02	-6.220093e+01	-2.088505e+02
7.980000e+02	4.111313e+03	-7.204710e+01	-3.191917e+01	1.258973e+00	9.288832e+01	4.132912e+01	1.634879e+02	-2.907664e+01	-5.985320e+01	2.793515e+01	3.520206e+01	4.104900e+00	-3.393593e+01	-4.674396e+01	1.500954e+02	-5.720607e+01	-1.748350e+02
7.990000e+02	4.090367e+03	-2.517623e+01	-3.433585e+01	9.912433e+00	1.282645e+02	4.619992e+01	1.908942e+02	-2.437381e+01	-6.579386e+01	3.145883e+01	3.398650e+01	1.987921e+01	-2.406610e+01	-2.772404e+01	1.761543e+02	-4.789052e+01	-1.435905e+02
8.000000e+02	4.133692e+03	1.665441e+01	-3.060516e+01	2.056063e+01	1.617760e+02	5.175574e+01	2.135987e+02	-1.514742e+01	-6.728288e+01	3.667822e+01	3.299908e+01	3.602420e+01	-1.243001e+01	-7.718963e+00	1.985220e+02	-3.674859e+01	-1.177590e+02
8.010000e+02	4.224389e+03	4.638108e+01	-2.459758e+01	2.903568e+01	1.883819e+02	5.635488e+01	2.295835e+02	-3.630969e+00	-6.601306e+01	4.141562e+01	3.162498e+01	5.000894e+01	-2.580745e+00	9.697411e+00	2.146448e+02	-2.626745e+01	-1.001678e+02
8.020000e+02	4.344984e+03	5.852414e+01	-1.861366e+01	3.363666e+01	2.038219e+02	5.953371e+01	2.371168e+02	8.181811e+00	-6.321587e+01	4.460194e+01	3.026406e+01	6.043930e+01	3.380916e+00	2.196548e+01	2.221852e+02	-1.836985e+01	-9.309425e+01
8.030000e+02	4.480808e+03	5.064652e+01	-1.315407e+01	3.517766e+01	2.057706e+02	6.185827e+01	2.352345e+02	1.893222e+01	-5.947572e+01	4.632092e+01	3.006353e+01	6.727139e+01	5.121949e+00	2.812745e+01	2.196969e+02	-1.393481e+01	-9.747507e+01
8.040000e+02	4.622213e+03	2.416720e+01	-7.382494e+00	3.616984e+01	1.945025e+02	6.446890e+01	2.240391e+02	2.804175e+01	-5.484993e+01	4.746624e+01	3.236094e+01	7.160155e+01	3.816009e+00	2.899780e+01	2.070358e+02	-1.254350e+01	-1.123138e+02
8.050000e+02	4.764960e+03	-1.564962e+01	1.473771e-02	3.955087e+01	1.729292e+02	6.849822e+01	2.047844e+02	3.559507e+01	-4.915803e+01	4.917112e+01	3.805546e+01	7.513846e+01	1.501679e+00	2.685969e+01	1.854564e+02	-1.253870e+01	-1.345037e+02
8.060000e+02	4.908460e+03	-6.047973e+01	1.004384e+01	4.754184e+01	1.460704e+02	7.460346e+01	1.797850e+02	4.207923e+01	-4.223241e+01	5.227420e+01	4.717965e+01	7.958400e+01	3.674811e-01	2.479038e+01	1.574547e+02	-1.139645e+01	-1.591790e+02
8.070000e+02	5.052306e+03	-1.003066e+02	2.307742e+01	6.108507e+01	1.201434e+02	8.280756e+01	1.521922e+02	4.814632e+01	-3.399190e+01	5.706697e+01	5.886933e+01	8.615988e+01	2.219886e+00	2.583805e+01	1.264503e+02	-6.319117e+00	-1.805558e+02
8.080000e+02	5.192429e+03	-1.251059e+02	3.907907e+01	7.998670e+01	1.014950e+02	9.270208e+01	1.256559e+02	5.451132e+01	-2.435073e+01	6.342728e+01	7.175400e+01	9.542351e+01	8.235436e+00	3.230572e+01	9.637970e+01	5.103772e+00	-1.930629e+02
8.090000e+02	5.318817e+03	-1.265400e+02	5.815427e+01	1.035460e+02	9.559123e+01	1.038951e+02	1.038914e+02	6.198156e+01	-1.309605e+01	7.124780e+01	8.460120e+01	1.073759e+02	1.894577e+01	4.533547e+01	7.124270e+01	2.433826e+01	-1.924572e+02
8.100000e+02	5.416398e+03	-9.934541e+01	8.103528e+01	1.312651e+02	1.062293e+02	1.164680e+02	9.018915e+01	7.151269e+01	1.199073e-01	8.091303e+01	9.693111e+01	1.217428e+02	3.433295e+01	6.485493e+01	5.463264e+01	5.158812e+01	-1.766105e+02
8.110000e+02	5.469302e+03	-4.216704e+01	1.091521e+02	1.632498e+02	1.350499e+02	1.311898e+02	8.693161e+01	8.415323e+01	1.561451e+01	9.353557e+01	1.093195e+02	1.382485e+02	5.392699e+01	8.980119e+01	4.927579e+01	8.576765e+01	-1.457718e+02
8.120000e+02	5.466987e+03	4.223583e+01	1.441411e+02	2.000728e+02	1.813222e+02	1.493253e+02	9.518260e+01	1.007876e+02	3.338853e+01	1.107509e+02	1.232189e+02	1.567142e+02	7.684831e+01	1.184378e+02	5.660659e+01	1.247115e+02	-1.023091e+02
8.130000e+02	5.409542e+03	1.472890e+02	1.868885e+02	2.420927e+02	2.419044e+02	1.720361e+02	1.143919e+02	1.216912e+02	5.283211e+01	1.340553e+02	1.403055e+02	1.768877e+02	1.017794e+02	1.485764e+02	7.640937e+01	1.654933e+02	-5.012280e+01
8.140000e+02	5.309787e+03	2.632004e+02	2.364200e+02	2.884428e+02	3.113182e+02	1.995518e+02	1.422550e+02	1.460338e+02	7.253332e+01	1.638861e+02	1.615516e+02	1.980471e+02	1.268820e+02	1.776216e+02	1.065874e+02	2.047313e+02	6.012947e+00
8.150000e+02	5.191238e+03	3.777760e+02	2.890906e+02	3.361108e+02	3.820296e+02	2.304351e+02	1.748017e+02	1.715614e+02	9.027624e+01	1.988142e+02	1.863729e+02	2.185712e+02	1.497277e+02	2.025291e+02	1.431788e+02	2.388533e+02	6.101451e+01
8.160000e+02	5.082914e+03	4.776509e+02	3.385765e+02	3.796515e+02	4.451944e+02	2.613167e+02	2.068346e+02	1.947158e+02	1.033082e+02	2.352685e+02	2.122543e+02	2.357803e+02	1.673867e+02	2.199117e+02	1.807845e+02	2.644139e+02	1.099861e+02
8.170000e+02	5.013070e+03	5.502901e+02	3.770362e+02	4.120223e+02	4.921355e+02	2.873866e+02	2.328288e+02	2.113581e+02	1.089445e+02	2.680921e+02	2.351560e+02	2.463346e+02	1.768563e+02	2.265373e+02	2.135323e+02	2.786081e+02	1.488136e+02
8.180000e+02	5.003939e+03	5.869054e+02	3.974433e+02	4.266758e+02	5.165442e+02	3.036846e+02	2.482672e+02	2.180477e+02	1.055011e+02	2.919426e+02	2.507391e+02	2.472722e+02	1.759277e+02	2.202896e+02	2.365233e+02	2.800262e+02	1.749796e+02
8.190000e+02	5.068562e+03	5.858044e+02	3.965404e+02	4.204489e+02	5.168983e+02	3.068819e+02	2.511324e+02	2.135389e+02	9.336806e+01	3.031727e+02	2.560884e+02	2.374414e+02	1.643528e+02	2.013595e+02	2.474213e+02	2.694820e+02	1.884870e+02
8.200000e+02	5.209700e+03	5.549394e+02	3.773348e+02	3.961773e+02	4.981355e+02	2.969354e+02	2.430312e+02	1.999223e+02	7.582478e+01	3.015103e+02	2.512943e+02	2.187607e+02	1.448769e+02	1.731580e+02	2.476045e+02	2.505352e+02	1.924963e+02
8.210000e+02	5.420227e+03	5.120927e+02	3.498846e+02	3.637086e+02	4.715483e+02	2.778819e+02	2.293623e+02	1.828135e+02	5.909775e+01	2.907871e+02	2.401682e+02	1.966352e+02	1.235357e+02	1.423726e+02	2.422660e+02	2.292854e+02	1.931485e+02
8.220000e+02	5.684488e+03	4.816142e+02	3.295287e+02	3.383567e+02	4.523515e+02	2.572461e+02	2.181713e+02	1.702459e+02	5.131276e+01	2.782163e+02	2.296022e+02	1.790728e+02	1.087513e+02	1.178171e+02	2.391402e+02	2.132130e+02	1.982447e+02
8.230000e+02	5.980442e+03	4.879196e+02	3.326568e+02	3.367895e+02	4.552984e+02	2.440238e+02	2.178310e+02	1.704174e+02	6.039722e+01	2.722603e+02	2.275893e+02	1.745499e+02	1.091983e+02	1.081951e+02	2.460661e+02	2.092327e+02	2.149217e+02
8.240000e+02	6.282539e+03	5.475032e+02	3.712085e+02	3.714918e+02	4.896603e+02	2.457990e+02	2.342241e+02	1.889526e+02	9.148719e+01	2.797226e+02	2.404980e+02	1.892361e+02	1.309930e+02	1.194026e+02	2.681461e+02	2.215134e+02	2.470109e+02
8.250000e+02	6.565023e+03	6.622371e+02	4.478254e+02	4.457397e+02	5.553572e+02	2.659816e+02	2.684237e+02	2.266407e+02	1.447312e+02	3.030964e+02	2.705694e+02	2.245549e+02	1.751701e+02	1.522905e+02	3.055367e+02	2.498188e+02	2.930595e+02
8.260000e+02	6.804930e+03	8.166145e+02	5.535426e+02	5.510418e+02	6.417654e+02	3.022052e+02	3.157757e+02	2.785227e+02	2.143632e+02	3.391825e+02	3.145959e+02	2.760213e+02	2.364462e+02	2.017366e+02	3.527509e+02	2.890123e+02	3.458694e+02
8.270000e+02	6.983979e+03	9.803140e+02	6.690752e+02	6.681999e+02	7.298088e+02	3.465527e+02	3.668023e+02	3.347504e+02	2.895187e+02	3.795606e+02	3.643346e+02	3.338736e+02	3.038657e+02	2.574567e+02	3.998078e+02	3.299987e+02	3.938757e+02
8.280000e+02	7.089039e+03	1.115566e+03	7.694716e+02	7.718523e+02	7.967756e+02	3.876193e+02	4.096823e+02	3.830076e+02	3.566557e+02	4.128207e+02	4.085853e+02	3.853859e+02	3.632673e+02	3.063892e+02	4.348811e+02	3.618925e+02	4.240108e+02
8.290000e+02	7.111630e+03	1.187106e+03	8.307111e+02	8.371330e+02	8.223743e+02	4.137631e+02	4.335077e+02	4.117439e+02	4.028826e+02	4.278337e+02	4.362668e+02	4.181626e+02	4.008661e+02	3.359653e+02	4.475756e+02	3.747975e+02	4.251799e+02
8.300000e+02	7.047427e+03	1.171671e+03	8.361841e+02	8.463728e+02	7.941881e+02	4.164697e+02	4.312745e+02	4.132190e+02	4.191999e+02	4.169893e+02	4.395002e+02	4.234038e+02	4.068719e+02	3.373037e+02	4.317917e+02	3.623963e+02	3.913097e+02
8.310000e+02	6.896495e+03	1.064252e+03	7.810937e+02	7.938019e+02	7.109626e+02	3.927413e+02	4.017108e+02	3.854649e+02	4.027171e+02	3.783812e+02	4.157307e+02	3.981688e+02	3.780700e+02	3.074235e+02	3.873486e+02	3.236151e+02	3.231282e+02
8.320000e+02	6.664126e+03	8.794049e+02	6.735532e+02	6.869105e+02	5.828986e+02	3.457776e+02	3.494676e+02	3.326526e+02	3.572532e+02	3.163039e+02	3.682704e+02	3.460053e+02	3.186384e+02	2.498899e+02	3.199923e+02	2.629089e+02	2.282535e+02
8.330000e+02	6.361321e+03	6.474686e+02	5.322111e+02	5.441965e+02	4.290194e+02	2.838145e+02	2.837301e+02	2.638529e+02	2.922173e+02	2.399968e+02	3.051751e+02	2.758337e+02	2.390193e+02	1.737754e+02	2.399114e+02	1.891120e+02	1.196300e+02
8.340000e+02	6.003901e+03	4.069252e+02	3.812578e+02	3.901280e+02	2.724800e+02	2.175962e+02	2.157631e+02	1.906306e+02	2.201483e+02	1.611116e+02	2.368934e+02	1.994963e+02	1.532321e+02	9.129386e+01	1.592782e+02	1.132070e+02	1.274550e+01
8.350000e+02	5.610031e+03	1.951663e+02	2.443725e+02	2.489288e+02	1.351843e+02	1.573772e+02	1.561634e+02	1.242077e+02	1.536357e+02	9.073834e+01	1.734881e+02	1.287593e+02	7.543791e+01	1.482301e+01	8.952483e+01	4.566549e+01	-7.766895e+01
8.360000e+02	5.197145e+03	4.024420e+01	1.393725e+02	1.390487e+02	3.317616e+01	1.104327e+02	1.125936e+02	7.299819e+01	1.024818e+02	3.689188e+01	1.223016e+02	7.266963e+01	1.674406e+01	-4.583243e+01	3.905359e+01	-5.870956e+00	-1.406306e+02
8.370000e+02	4.779813e+03	-4.419849e+01	7.501058e+01	6.984486e+01	-2.602845e+01	7.980422e+01	8.855100e+01	4.116085e+01	7.186105e+01	3.150606e+00	8.672692e+01	3.599010e+01	-1.688530e+01	-8.519558e+01	1.189854e+01	-3.792050e+01	-1.708286e+02
8.380000e+02	4.369641e+03	-5.966110e+01	5.062696e+01	4.119336e+01	-4.362834e+01	6.451443e+01	8.336118e+01	2.847192e+01	6.191348e+01	-1.128528e+01	6.631528e+01	1.903298e+01	-2.512530e+01	-1.024969e+02	7.562801e+00	-5.118501e+01	-1.690032e+02
8.390000e+02	3.976950e+03	-1.940234e+01	5.842797e+01	4.576186e+01	-2.746786e+01	6.095498e+01	9.320935e+01	3.139423e+01	6.875702e+01	-1.032753e+01	5.798553e+01	1.872251e+01	-1.222708e+01	-1.007464e+02	2.192821e+01	-4.939050e+01	-1.407648e+02
8.400000e+02	3.612830e+03	5.754459e+01	8.734888e+01	7.283976e+01	1.139323e+01	6.477988e+01	1.127473e+02	4.484925e+01	8.646146e+01	8.892624e-01	5.775396e+01	3.033441e+01	1.508252e+01	-8.498540e+01	4.885792e+01	-3.745968e+01	-9.435057e+01
8.410000e+02	3.289840e+03	1.527295e+02	1.270485e+02	1.122513e+02	6.224165e+01	7.255835e+01	1.367217e+02	6.402159e+01	1.092481e+02	1.780249e+01	6.231207e+01	4.921879e+01	4.993625e+01	-6.041199e+01	8.196692e+01	-1.972062e+01	-3.814829e+01
8.420000e+02	3.020505e+03	2.529308e+02	1.707302e+02	1.570783e+02	1.172997e+02	8.266004e+01	1.611707e+02	8.561138e+01	1.331783e+02	3.755426e+01	6.995067e+01	7.195425e+01	8.712523e+01	-3.100651e+01	1.160659e+02	1.238440e+00	2.117037e+01
8.430000e+02	2.814173e+03	3.519341e+02	2.161067e+02	2.045735e+02	1.727556e+02	9.524180e+01	1.839694e+02	1.082518e+02	1.568667e+02	5.924237e+01	8.066745e+01	9.671424e+01	1.239045e+02	1.023050e+00	1.479708e+02	2.478980e+01	7.941962e+01
8.440000e+02	2.673885e+03	4.495533e+02	2.646187e+02	2.554284e+02	2.283101e+02	1.115819e+02	2.047607e+02	1.321750e+02	1.811750e+02	8.344610e+01	9.563442e+01	1.229813e+02	1.597935e+02	3.503185e+01	1.766256e+02	5.169021e+01	1.346059e+02
8.450000e+02	2.595002e+03	5.489952e+02	3.196201e+02	3.121140e+02	2.858103e+02	1.331941e+02	2.244788e+02	1.584603e+02	2.082135e+02	1.114090e+02	1.163889e+02	1.509520e+02	1.957257e+02	7.129003e+01	2.026943e+02	8.312255e+01	1.860340e+02
8.460000e+02	2.566414e+03	6.539624e+02	3.843999e+02	3.771290e+02	3.476724e+02	1.610947e+02	2.447015e+02	1.882364e+02	2.401469e+02	1.442555e+02	1.440920e+02	1.809645e+02	2.330390e+02	1.102746e+02	2.278628e+02	1.198171e+02	2.333987e+02
8.470000e+02	2.573795e+03	7.664906e+02	4.606589e+02	4.517071e+02	4.155880e+02	1.953767e+02	2.669913e+02	2.220613e+02	2.782217e+02	1.824397e+02	1.790299e+02	2.131099e+02	2.726805e+02	1.521437e+02	2.540549e+02	1.615413e+02	2.762517e+02
8.480000e+02	2.603340e+03	8.858060e+02	5.476319e+02	5.351082e+02	4.896690e+02	2.350323e+02	2.922963e+02	2.595214e+02	3.222124e+02	2.254223e+02	2.203548e+02	2.469992e+02	3.147579e+02	1.964334e+02	2.826868e+02	2.069910e+02	3.138940e+02
8.490000e+02	2.644245e+03	1.007956e+03	6.417457e+02	6.243254e+02	5.679624e+02	2.778895e+02	3.204451e+02	2.989963e+02	3.702638e+02	2.714851e+02	2.659774e+02	2.815785e+02	3.583537e+02	2.418923e+02	3.140412e+02	2.539305e+02	3.454892e+02
8.500000e+02	2.689018e+03	1.125869e+03	7.366548e+02	7.140201e+02	6.462487e+02	3.206120e+02	3.498133e+02	3.375776e+02	4.190075e+02	3.176509e+02	3.125673e+02	3.149463e+02	4.014595e+02	2.863729e+02	3.468529e+02	2.994053e+02	3.701574e+02
8.510000e+02	2.731884e+03	1.229753e+03	8.236513e+02	7.966770e+02	7.181668e+02	3.588464e+02	3.772837e+02	3.712242e+02	4.638652e+02	3.597904e+02	3.557107e+02	3.442540e+02	4.409740e+02	3.268001e+02	3.782282e+02	3.399481e+02	3.869567e+02
8.520000e+02	2.766623e+03	1.308001e+03	8.925758e+02	8.631584e+02	7.758009e+02	3.876609e+02	3.986054e+02	3.952626e+02	4.995335e+02	3.930470e+02	3.903238e+02	3.658498e+02	4.728431e+02	3.593236e+02	4.039920e+02	3.718185e+02	3.948284e+02
8.530000e+02	2.785401e+03	1.348793e+03	9.333123e+02	9.038498e+02	8.108135e+02	4.023316e+02	4.091555e+02	4.052397e+02	5.206888e+02	4.126287e+02	4.113735e+02	3.757823e+02	4.924855e+02	3.797603e+02	4.194531e+02	3.913699e+02	3.926580e+02
8.540000e+02	2.779529e+03	1.342316e+03	9.377246e+02	9.103903e+02	8.160125e+02	3.993543e+02	4.049563e+02	3.979586e+02	5.228952e+02	4.148349e+02	4.148224e+02	3.706298e+02	4.955776e+02	3.843303e+02	4.204374e+02	3.955845e+02	3.795299e+02
8.550000e+02	2.742004e+03	1.283143e+03	9.016056e+02	8.776690e+02	7.870260e+02	3.773909e+02	3.836881e+02	3.723814e+02	5.035792e+02	3.980318e+02	3.985821e+02	3.484508e+02	4.790969e+02	3.705459e+02	4.043294e+02	3.827059e+02	3.551207e+02
8.560000e+02	2.670628e+03	1.172066e+03	8.260507e+02	8.055113e+02	7.236257e+02	3.378178e+02	3.454127e+02	3.300822e+02	4.628146e+02	3.632412e+02	3.631866e+02	3.095492e+02	4.423347e+02	3.380009e+02	3.708364e+02	3.527982e+02	3.200699e+02
8.570000e+02	2.570175e+03	1.016722e+03	7.177457e+02	6.994343e+02	6.302747e+02	2.846465e+02	2.927912e+02	2.750727e+02	4.036346e+02	3.141156e+02	3.119386e+02	2.567680e+02	3.875055e+02	2.887886e+02	3.222605e+02	3.080224e+02	2.761564e+02
8.580000e+02	2.452493e+03	8.306907e+02	5.879621e+02	5.700744e+02	5.156628e+02	2.238024e+02	2.307152e+02	2.130473e+02	3.316891e+02	2.562766e+02	2.504233e+02	1.951665e+02	3.196605e+02	2.273689e+02	2.631895e+02	2.524805e+02	2.261835e+02
8.590000e+02	2.334371e+03	6.312105e+02	4.504833e+02	4.313253e+02	3.912874e+02	1.619677e+02	1.654366e+02	1.502919e+02	2.542740e+02	1.962119e+02	1.854869e+02	1.311409e+02	2.458471e+02	1.598798e+02	1.996807e+02	1.916128e+02	1.735948e+02
8.600000e+02	2.234038e+03	4.361749e+02	3.190630e+02	2.977075e+02	2.694484e+02	1.053448e+02	1.034306e+02	9.259616e+01	1.789920e+02	1.400725e+02	1.239670e+02	7.124768e+01	1.737485e+02	9.307959e+01	1.381581e+02	1.312951e+02	1.219441e+02
8.610000e+02	2.167626e+03	2.612876e+02	2.051754e+02	1.817898e+02	1.612352e+02	5.870510e+01	5.031458e+01	4.446697e+01	1.124522e+02	9.272363e+01	7.155141e+01	2.108837e+01	1.102455e+02	3.323832e+01	8.433266e+01	7.690586e+01	7.439309e+01
8.620000e+02	2.146808e+03	1.181776e+02	1.166777e+02	9.244621e+01	7.507480e+01	2.496075e+01	1.012079e+01	8.801233e+00	5.939504e+01	5.728212e+01	3.208904e+01	-1.542344e+01	6.036334e+01	-1.470490e+01	4.244153e+01	3.263510e+01	3.337809e+01
8.630000e+02	2.178090e+03	1.382776e+01	5.759968e+01	3.433683e+01	1.615559e+01	5.272382e+00	-1.492751e+01	-1.301699e+01	2.243400e+01	3.516430e+01	7.470648e+00	-3.627327e+01	2.687139e+01	-4.754345e+01	1.496363e+01	1.192446e+00	5.005621e-01
8.640000e+02	2.263416e+03	-4.891261e+01	2.879897e+01	8.450715e+00	-1.335344e+01	-5.079517e-01	-2.420379e+01	-2.078352e+01	2.333781e+00	2.646320e+01	-2.045898e+00	-4.112561e+01	1.050086e+01	-6.379618e+01	2.766478e+00	-1.612065e+01	-2.341476e+01
8.650000e+02	2.401226e+03	-7.038383e+01	2.890734e+01	1.312038e+01	-1.370355e+01	6.635874e+00	-1.827667e+01	-1.514879e+01	-1.468974e+00	3.037402e+01	2.636703e+00	-3.093015e+01	1.048697e+01	-6.348984e+01	5.460522e+00	-1.916584e+01	-3.821743e+01
8.660000e+02	2.587124e+03	-5.342589e+01	5.500559e+01	4.485166e+01	1.292607e+01	2.514069e+01	1.397063e+00	2.527587e+00	9.565154e+00	4.543813e+01	1.978596e+01	-7.621499e+00	2.506804e+01	-4.795209e+01	2.169353e+01	-8.770016e+00	-4.439156e+01
8.670000e+02	2.813783e+03	-3.243620e+00	1.027896e+02	9.862541e+01	6.255463e+01	5.284957e+01	3.253160e+01	3.012987e+01	3.323578e+01	6.955177e+01	4.691523e+01	2.596965e+01	5.171163e+01	-1.971470e+01	4.923285e+01	1.331872e+01	-4.309338e+01
8.680000e+02	3.070380e+03	7.241720e+01	1.664210e+02	1.678125e+02	1.292844e+02	8.688072e+01	7.189160e+01	6.469321e+01	6.654132e+01	9.987814e+01	8.072204e+01	6.608766e+01	8.709107e+01	1.755067e+01	8.488815e+01	4.439308e+01	-3.617036e+01
8.690000e+02	3.342253e+03	1.633858e+02	2.385302e+02	2.441921e+02	2.053515e+02	1.236372e+02	1.152345e+02	1.024760e+02	1.056339e+02	1.328955e+02	1.171459e+02	1.081399e+02	1.270462e+02	5.924769e+01	1.244920e+02	8.085662e+01	-2.601716e+01
8.700000e+02	3.611498e+03	2.580105e+02	3.107901e+02	3.185644e+02	2.817460e+02	1.591490e+02	1.575763e+02	1.393391e+02	1.460406e+02	1.647494e+02	1.517593e+02	1.471145e+02	1.668045e+02	1.003639e+02	1.631760e+02	1.185677e+02	-1.518098e+01
8.710000e+02	3.858750e+03	3.450086e+02	3.751436e+02	3.821043e+02	3.495106e+02	1.897440e+02	1.938894e+02	1.714071e+02	1.832479e+02	1.918962e+02	1.805080e+02	1.783685e+02	2.015954e+02	1.362513e+02	1.960411e+02	1.534684e+02	-5.770631e+00
8.720000e+02	4.065757e+03	4.157213e+02	4.253541e+02	4.281332e+02	4.014205e+02	2.128346e+02	2.200993e+02	1.958168e+02	2.135200e+02	2.118350e+02	2.005852e+02	1.985963e+02	2.275472e+02	1.634749e+02	2.190993e+02	1.823214e+02	1.130026e+00
8.730000e+02	4.217878e+03	4.659154e+02	4.582885e+02	4.536464e+02	4.334587e+02	2.274999e+02	2.340469e+02	2.112774e+02	2.346528e+02	2.236369e+02	2.110911e+02	2.066357e+02	2.425546e+02	1.804329e+02	2.301836e+02	2.032767e+02	5.781366e+00
8.740000e+02	4.305612e+03	4.963329e+02	4.743772e+02	4.599259e+02	4.454973e+02	2.345906e+02	2.360275e+02	2.182102e+02	2.463445e+02	2.280341e+02	2.131738e+02	2.037596e+02	2.467518e+02	1.875060e+02	2.294707e+02	2.160293e+02	9.645087e+00
8.750000e+02	4.324722e+03	5.116474e+02	4.770021e+02	4.518824e+02	4.408627e+02	2.362672e+02	2.286353e+02	2.183864e+02	2.500014e+02	2.270023e+02	2.095358e+02	1.932677e+02	2.423468e+02	1.866549e+02	2.193699e+02	2.214964e+02	1.476191e+01
8.760000e+02	4.275249e+03	5.181371e+02	4.709906e+02	4.362698e+02	4.248900e+02	2.351070e+02	2.158956e+02	2.141688e+02	2.480249e+02	2.229673e+02	2.034472e+02	1.794492e+02	2.328233e+02	1.805947e+02	2.037552e+02	2.211388e+02	2.284317e+01
8.770000e+02	4.160242e+03	5.209259e+02	4.607543e+02	4.193758e+02	4.029659e+02	2.330990e+02	2.019528e+02	2.076213e+02	2.428409e+02	2.179151e+02	1.976058e+02	1.662441e+02	2.217711e+02	1.718276e+02	1.867680e+02	2.162021e+02	3.441706e+01
8.780000e+02	3.985069e+03	5.218533e+02	4.487564e+02	4.050127e+02	3.787627e+02	2.309008e+02	1.897739e+02	1.998074e+02	2.360370e+02	2.127213e+02	1.932529e+02	1.560647e+02	2.117612e+02	1.618649e+02	1.715932e+02	2.071735e+02	4.838141e+01
8.790000e+02	3.757647e+03	5.187961e+02	4.348528e+02	3.935120e+02	3.532862e+02	2.276363e+02	1.803381e+02	1.905379e+02	2.279241e+02	2.069311e+02	1.898553e+02	1.491977e+02	2.036583e+02	1.508940e+02	1.596314e+02	1.936583e+02	6.217192e+01
8.800000e+02	3.489175e+03	5.066747e+02	4.167007e+02	3.820285e+02	3.250390e+02	2.213014e+02	1.725966e+02	1.786521e+02	2.176567e+02	1.990470e+02	1.854433e+02	1.439797e+02	1.965866e+02	1.379755e+02	1.503404e+02	1.747015e+02	7.251005e+01
8.810000e+02	3.194435e+03	4.796989e+02	3.910113e+02	3.659479e+02	2.911660e+02	2.096061e+02	1.641775e+02	1.627066e+02	2.038215e+02	1.871934e+02	1.774450e+02	1.376422e+02	1.885042e+02	1.216600e+02	1.417628e+02	1.494057e+02	7.645632e+01
8.820000e+02	2.890874e+03	4.339408e+02	3.551298e+02	3.408195e+02	2.490918e+02	1.909184e+02	1.525214e+02	1.417848e+02	1.852367e+02	1.698974e+02	1.636873e+02	1.274726e+02	1.771333e+02	1.007763e+02	1.314984e+02	1.175952e+02	7.237208e+01
8.830000e+02	2.596352e+03	3.692664e+02	3.083713e+02	3.041171e+02	1.980247e+02	1.649667e+02	1.359955e+02	1.161144e+02	1.616604e+02	1.467158e+02	1.432142e+02	1.118575e+02	1.609038e+02	7.510644e+01	1.177428e+02	8.028322e+01	6.044300e+01
8.840000e+02	2.326292e+03	2.899886e+02	2.526995e+02	2.562985e+02	1.398137e+02	1.330824e+02	1.145853e+02	8.727749e+01	1.341812e+02	1.185237e+02	1.166831e+02	9.087310e+01	1.396160e+02	4.573753e+01	1.000248e+02	3.978976e+01	4.260723e+01
8.850000e+02	2.091423e+03	2.041260e+02	1.926110e+02	2.009343e+02	7.891827e+01	9.795816e+01	8.996932e+01	5.797437e+01	1.051976e+02	8.741910e+01	8.627742e+01	6.629368e+01	1.146573e+02	1.500733e+01	7.942870e+01	-5.099657e-01	2.196198e+01
8.860000e+02	1.897050e+03	1.216143e+02	1.343259e+02	1.439726e+02	2.155608e+01	6.305225e+01	6.502392e+01	3.145558e+01	7.801878e+01	5.631287e+01	5.522415e+01	4.109792e+01	8.874850e+01	-1.391244e+01	5.828314e+01	-3.672698e+01	1.889630e+00
8.870000e+02	1.744022e+03	5.207555e+01	8.453668e+01	9.240763e+01	-2.567431e+01	3.185072e+01	4.298667e+01	1.081772e+01	5.620383e+01	2.833833e+01	2.708804e+01	1.868409e+01	6.531917e+01	-3.766217e+01	3.947305e+01	-6.514757e+01	-1.480325e+01
8.880000e+02	1.630747e+03	2.783865e+00	4.903007e+01	5.271613e+01	-5.728359e+01	7.186050e+00	2.658306e+01	-1.642116e+00	4.280523e+01	6.229798e+00	5.028056e+00	2.039386e+00	4.768713e+01	-5.339690e+01	2.562569e+01	-8.290968e+01	-2.649139e+01
8.890000e+02	1.555140e+03	-2.266017e+01	3.150281e+01	2.945205e+01	-7.008387e+01	-9.238293e+00	1.738511e+01	-4.867449e+00	3.969813e+01	-8.191116e+00	-8.818395e+00	-6.922493e+00	3.826897e+01	-5.937077e+01	1.843124e+01	-8.851561e+01	-3.294500e+01
8.900000e+02	1.515613e+03	-2.465703e+01	3.285537e+01	2.434737e+01	-6.377469e+01	-1.703513e+01	1.556430e+01	8.016262e-01	4.716766e+01	-1.430901e+01	-1.369655e+01	-7.710128e+00	3.804193e+01	-5.526405e+01	1.828941e+01	-8.206460e+01	-3.513532e+01
8.910000e+02	1.510791e+03	-6.922078e+00	5.114939e+01	3.614774e+01	-4.079694e+01	-1.701555e+01	2.006164e+01	1.377469e+01	6.387203e+01	-1.272040e+01	-1.026807e+01	-1.229921e+00	4.641341e+01	-4.218057e+01	2.435582e+01	-6.515316e+01	-3.472131e+01
8.920000e+02	1.538342e+03	2.494802e+01	8.224544e+01	6.120990e+01	-5.547126e+00	-1.081713e+01	2.906694e+01	3.161299e+01	8.720052e+01	-4.953947e+00	-3.208821e-01	1.057556e+01	6.152813e+01	-2.233385e+01	3.492921e+01	-4.047659e+01	-3.338838e+01
8.930000e+02	1.593760e+03	6.517094e+01	1.209291e+02	9.464862e+01	3.676409e+01	-3.951692e-01	4.061246e+01	5.158034e+01	1.139218e+02	7.007392e+00	1.375293e+01	2.529923e+01	8.089301e+01	1.471760e+00	4.801419e+01	-1.125022e+01	-3.224960e+01
8.940000e+02	1.669865e+03	1.091724e+02	1.621592e+02	1.316315e+02	8.122765e+01	1.246340e+01	5.306868e+01	7.119096e+01	1.409139e+02	2.124429e+01	2.954641e+01	4.066412e+01	1.020827e+02	2.640206e+01	6.184889e+01	1.937872e+01	-3.150056e+01
8.950000e+02	1.757446e+03	1.542228e+02	2.020143e+02	1.683689e+02	1.239802e+02	2.644881e+01	6.538692e+01	8.859637e+01	1.657321e+02	3.628038e+01	4.510870e+01	5.495321e+01	1.232582e+02	5.002997e+01	7.521803e+01	4.876210e+01	-3.043896e+01
8.960000e+02	1.846898e+03	1.991449e+02	2.380266e+02	2.024750e+02	1.623918e+02	4.077048e+01	7.704518e+01	1.027033e+02	1.868297e+02	5.119455e+01	5.916188e+01	6.715527e+01	1.433118e+02	7.053723e+01	8.746908e+01	7.492235e+01	-2.783831e+01
8.970000e+02	1.930287e+03	2.432865e+02	2.688488e+02	2.326531e+02	1.947427e+02	5.495195e+01	8.777608e+01	1.130157e+02	2.033965e+02	6.544947e+01	7.103490e+01	7.682488e+01	1.616178e+02	8.666610e+01	9.827380e+01	9.646802e+01	-2.254198e+01
8.980000e+02	2.003108e+03	2.852678e+02	2.935042e+02	2.579596e+02	2.196468e+02	6.850626e+01	9.723848e+01	1.193117e+02	2.149534e+02	7.854795e+01	8.040548e+01	8.377296e+01	1.775548e+02	9.751108e+01	1.072808e+02	1.123642e+02	-1.406201e+01
8.990000e+02	2.065106e+03	3.221288e+02	3.106718e+02	2.770948e+02	2.355734e+02	8.067368e+01	1.048014e+02	1.213384e+02	2.209552e+02	8.971398e+01	8.701461e+01	8.776806e+01	1.900821e+02	1.023075e+02	1.138427e+02	1.217278e+02	-2.959014e+00
9.000000e+02	2.119864e+03	3.493385e+02	3.184331e+02	2.881326e+02	2.407532e+02	9.037025e+01	1.095379e+02	1.186977e+02	2.206440e+02	9.778699e+01	9.050871e+01	8.840432e+01	1.976270e+02	1.003668e+02	1.169560e+02	1.237929e+02	9.144848e+00
9.010000e+02	2.173232e+03	3.617338e+02	3.146538e+02	2.888521e+02	2.335400e+02	9.638667e+01	1.104178e+02	1.109864e+02	2.132394e+02	1.014128e+02	9.047651e+01	8.519226e+01	1.983800e+02	9.122095e+01	1.154456e+02	1.180886e+02	1.993081e+01
9.020000e+02	2.230992e+03	3.550142e+02	2.978174e+02	2.775044e+02	2.130588e+02	9.774880e+01	1.065982e+02	9.811249e+01	1.983541e+02	9.946240e+01	8.663348e+01	7.780710e+01	1.908764e+02	7.491582e+01	1.083135e+02	1.047379e+02	2.699117e+01
9.030000e+02	2.296414e+03	3.271591e+02	2.678749e+02	2.536152e+02	1.798244e+02	9.407309e+01	9.769015e+01	8.060676e+01	1.763847e+02	9.148989e+01	7.903211e+01	6.635479e+01	1.745897e+02	5.229755e+01	9.510863e+01	8.470703e+01	2.845426e+01
9.040000e+02	2.368418e+03	2.792075e+02	2.266714e+02	2.184367e+02	1.360444e+02	8.576398e+01	8.392415e+01	5.975341e+01	1.486478e+02	7.802389e+01	6.818240e+01	5.152624e+01	1.502616e+02	2.513025e+01	7.618556e+01	5.984912e+01	2.341128e+01
9.050000e+02	2.440972e+03	2.151783e+02	1.777566e+02	1.748731e+02	8.549454e+01	7.399143e+01	6.621275e+01	3.746483e+01	1.171861e+02	6.057124e+01	5.503830e+01	3.458854e+01	1.198424e+02	-4.035907e+00	5.279377e+01	3.269057e+01	1.203267e+01
9.060000e+02	2.504066e+03	1.413067e+02	1.257142e+02	1.269936e+02	3.305148e+01	6.049473e+01	4.614781e+01	1.596539e+01	8.436169e+01	4.135355e+01	4.088986e+01	1.725144e+01	8.611125e+01	-3.221007e+01	2.700753e+01	6.033857e+00	-4.601686e+00
9.070000e+02	2.546137e+03	6.499132e+01	7.535732e+01	7.940491e+01	-1.592827e+01	4.732142e+01	2.595579e+01	-2.563611e+00	5.245161e+01	2.290701e+01	2.723853e+01	1.489632e+00	5.217323e+01	-5.640044e+01	1.541958e+00	-1.747962e+01	-2.483789e+01
9.080000e+02	2.557362e+03	-6.196521e+00	3.112086e+01	3.672990e+01	-5.622298e+01	3.659952e+01	8.382890e+00	-1.623462e+01	2.342010e+01	7.702204e+00	1.570896e+01	-1.062124e+01	2.102661e+01	-7.402142e+01	-2.051413e+01	-3.571706e+01	-4.681227e+01
9.090000e+02	2.532885e+03	-6.529614e+01	-3.221279e+00	3.268833e+00	-8.329110e+01	3.037941e+01	-3.548482e+00	-2.354677e+01	-1.103409e+00	-2.116382e+00	7.990932e+00	-1.705393e+01	-4.718035e+00	-8.319239e+01	-3.604420e+01	-4.725358e+01	-6.875193e+01
9.100000e+02	2.474996e+03	-1.065613e+02	-2.461476e+01	-1.724567e+01	-9.375368e+01	3.051763e+01	-6.941601e+00	-2.337399e+01	-1.974911e+01	-4.864224e+00	5.758943e+00	-1.600394e+01	-2.300243e+01	-8.291490e+01	-4.232357e+01	-5.143512e+01	-8.917200e+01
9.110000e+02	2.393483e+03	-1.259410e+02	-3.077307e+01	-2.193613e+01	-8.581003e+01	3.854752e+01	4.670824e-01	-1.495624e+01	-3.138686e+01	6.150099e-01	1.051845e+01	-6.120048e+00	-3.245434e+01	-7.314589e+01	-3.746569e+01	-4.834770e+01	-1.069523e+02
9.120000e+02	2.303870e+03	-1.214015e+02	-2.036945e+01	-9.159730e+00	-5.952019e+01	5.550042e+01	1.983065e+01	2.022107e+00	-3.524425e+01	1.487566e+01	2.337291e+01	1.322967e+01	-3.253415e+01	-5.477935e+01	-2.079451e+01	-3.872754e+01	-1.212764e+02
9.130000e+02	2.223874e+03	-9.298223e+01	6.640413e+00	2.111288e+01	-1.685017e+01	8.168818e+01	5.090559e+01	2.726395e+01	-3.112068e+01	3.776140e+01	4.476413e+01	4.173338e+01	-2.365408e+01	-2.953371e+01	6.978278e+00	-2.382902e+01	-1.314349e+02
9.140000e+02	2.169018e+03	-4.252661e+01	4.872974e+01	6.710109e+01	3.858635e+01	1.165034e+02	9.206119e+01	5.968242e+01	-1.956431e+01	6.829362e+01	7.427241e+01	7.805059e+01	-7.174865e+00	2.558640e-01	4.385076e+01	-5.263907e+00	-1.365543e+02
9.150000e+02	2.148745e+03	2.681027e+01	1.027524e+02	1.253527e+02	1.020546e+02	1.583156e+02	1.405767e+02	9.733347e+01	-1.879967e+00	1.046310e+02	1.105541e+02	1.199314e+02	1.479510e+01	3.191730e+01	8.689127e+01	1.516462e+01	-1.353956e+02
9.160000e+02	2.164278e+03	1.110340e+02	1.642517e+02	1.912365e+02	1.683575e+02	2.045308e+02	1.931106e+02	1.375458e+02	2.007448e+01	1.441748e+02	1.514466e+02	1.645298e+02	3.978713e+01	6.274538e+01	1.327536e+02	3.560580e+01	-1.264027e+02
9.170000e+02	2.208930e+03	2.055270e+02	2.280822e+02	2.596463e+02	2.324570e+02	2.518362e+02	2.461745e+02	1.772554e+02	4.422926e+01	1.838494e+02	1.942095e+02	2.088210e+02	6.543550e+01	9.027760e+01	1.781866e+02	5.427274e+01	-1.081062e+02
9.180000e+02	2.270651e+03	3.049581e+02	2.891574e+02	3.256780e+02	2.899333e+02	2.965928e+02	2.964726e+02	2.134620e+02	6.863753e+01	2.205153e+02	2.358250e+02	2.499869e+02	8.985373e+01	1.125104e+02	2.203940e+02	6.954196e+01	-7.981629e+01
9.190000e+02	2.335762e+03	4.030983e+02	3.430928e+02	3.850659e+02	3.372559e+02	3.352843e+02	3.410554e+02	2.436714e+02	9.167857e+01	2.514088e+02	2.732770e+02	2.856519e+02	1.117919e+02	1.280517e+02	2.571789e+02	8.007986e+01	-4.233241e+01
9.200000e+02	2.392468e+03	4.929212e+02	3.865816e+02	4.343063e+02	3.719231e+02	3.649188e+02	3.773438e+02	2.661941e+02	1.120943e+02	2.744814e+02	3.037671e+02	3.139290e+02	1.305446e+02	1.362193e+02	2.869054e+02	8.502086e+01	1.703892e+00
9.210000e+02	2.433008e+03	5.673092e+02	4.174872e+02	4.705798e+02	3.925606e+02	3.833148e+02	4.031488e+02	2.802390e+02	1.289259e+02	2.885553e+02	3.248875e+02	3.333442e+02	1.456999e+02	1.370908e+02	3.083884e+02	8.417580e+01	4.810633e+01
9.220000e+02	2.454056e+03	6.203844e+02	4.347658e+02	4.916999e+02	3.990336e+02	3.892670e+02	4.168122e+02	2.858282e+02	1.414647e+02	2.932953e+02	3.348151e+02	3.427764e+02	1.568942e+02	1.314944e+02	3.208398e+02	7.819806e+01	9.211570e+01
9.230000e+02	2.455776e+03	6.490832e+02	4.383719e+02	4.962784e+02	3.925495e+02	3.826305e+02	4.175001e+02	2.836171e+02	1.492917e+02	2.890750e+02	3.325691e+02	3.415384e+02	1.637198e+02	1.209228e+02	3.239439e+02	6.861061e+01	1.297339e+02
9.240000e+02	2.440340e+03	6.542934e+02	4.292253e+02	4.841225e+02	3.756431e+02	3.643537e+02	4.055498e+02	2.747063e+02	1.523884e+02	2.768325e+02	3.182974e+02	3.296179e+02	1.658359e+02	1.073566e+02	3.180280e+02	5.762096e+01	1.588760e+02
9.250000e+02	2.410659e+03	6.408846e+02	4.091858e+02	4.566516e+02	3.519083e+02	3.364306e+02	3.826637e+02	2.604779e+02	1.512164e+02	2.579659e+02	2.934584e+02	3.079570e+02	1.632037e+02	9.299405e+01	3.041983e+02	4.771665e+01	1.798126e+02
9.260000e+02	2.369671e+03	6.163392e+02	3.808975e+02	4.170176e+02	3.253991e+02	3.017008e+02	3.517497e+02	2.424355e+02	1.466545e+02	2.342404e+02	2.607379e+02	2.785672e+02	1.562892e+02	7.991330e+01	2.842886e+02	4.111773e+01	1.946602e+02
9.270000e+02	2.320139e+03	5.883187e+02	3.474122e+02	3.697041e+02	2.997726e+02	2.634494e+02	3.163510e+02	2.220202e+02	1.397612e+02	2.076490e+02	2.236153e+02	2.443219e+02	1.460970e+02	6.971540e+01	2.605497e+02	3.923027e+01	2.061166e+02
9.280000e+02	2.264762e+03	5.620731e+02	3.116467e+02	3.196488e+02	2.774235e+02	2.248622e+02	2.798254e+02	2.004209e+02	1.314462e+02	1.801992e+02	1.856646e+02	2.084307e+02	1.339910e+02	6.323193e+01	2.351614e+02	4.226924e+01	2.160064e+02
9.290000e+02	2.206392e+03	5.388072e+02	2.758824e+02	2.712028e+02	2.589508e+02	1.884998e+02	2.445977e+02	1.784507e+02	1.222084e+02	1.536733e+02	1.498285e+02	1.737771e+02	1.213798e+02	6.039146e+01	2.097699e+02	4.918740e+01	2.243214e+02
9.300000e+02	2.148309e+03	5.157945e+02	2.415392e+02	2.273513e+02	2.432323e+02	1.559926e+02	2.118107e+02	1.565743e+02	1.120810e+02	1.294580e+02	1.179483e+02	1.423910e+02	1.094075e+02	6.031773e+01	1.852747e+02	5.796345e+01	2.292252e+02
9.310000e+02	2.094440e+03	4.882764e+02	2.093323e+02	1.894888e+02	2.281507e+02	1.280709e+02	1.815218e+02	1.351015e+02	1.008171e+02	1.085155e+02	9.071913e+01	1.152618e+02	9.877360e+01	6.166296e+01	1.619649e+02	6.619087e+01	2.280525e+02
9.320000e+02	2.049391e+03	4.523649e+02	1.797081e+02	1.577618e+02	2.117228e+02	1.048792e+02	1.533218e+02	1.144676e+02	8.822498e+01	9.148381e+01	6.803577e+01	9.252452e+01	8.972967e+01	6.308486e+01	1.399248e+02	7.180260e+01	2.188667e+02
9.330000e+02	2.018151e+03	4.076759e+02	1.533053e+02	1.317236e+02	1.931765e+02	8.638643e+01	1.270481e+02	9.545245e+01	7.448989e+01	7.881641e+01	4.951182e+01	7.387379e+01	8.221542e+01	6.369992e+01	1.194765e+02	7.370408e+01	2.018756e+02
9.340000e+02	2.005422e+03	3.585005e+02	1.311856e+02	1.109456e+02	1.735113e+02	7.266637e+01	1.032345e+02	7.920744e+01	6.033668e+01	7.085008e+01	3.489781e+01	5.897045e+01	7.605147e+01	6.333540e+01	1.014167e+02	7.209834e+01	1.800414e+02
9.350000e+02	2.014765e+03	3.129468e+02	1.147175e+02	9.531636e+01	1.552899e+02	6.391435e+01	8.308578e+01	6.705120e+01	4.697447e+01	6.774420e+01	2.421031e+01	4.765321e+01	7.110989e+01	6.247585e+01	8.691418e+01	6.837931e+01	1.585562e+02
9.360000e+02	2.047868e+03	2.803440e+02	1.051842e+02	8.496824e+01	1.417333e+02	6.021769e+01	6.801452e+01	6.010695e+01	3.586136e+01	6.932389e+01	1.755584e+01	3.989421e+01	6.741625e+01	6.192916e+01	7.711939e+01	6.461727e+01	1.433179e+02
9.370000e+02	2.104130e+03	2.679234e+02	1.033071e+02	7.995748e+01	1.354894e+02	6.122388e+01	5.898487e+01	5.892266e+01	2.838586e+01	7.492214e+01	1.479027e+01	3.557618e+01	6.517091e+01	6.236015e+01	7.268189e+01	6.281075e+01	1.389589e+02
9.380000e+02	2.180543e+03	2.780654e+02	1.088820e+02	7.991439e+01	1.375738e+02	6.589224e+01	5.598335e+01	6.321079e+01	2.556359e+01	8.331919e+01	1.522286e+01	3.424608e+01	6.469495e+01	6.389408e+01	7.340913e+01	6.416786e+01	1.471700e+02
9.390000e+02	2.271676e+03	3.071470e+02	1.206400e+02	8.384386e+01	1.468844e+02	7.246597e+01	5.785971e+01	7.178537e+01	2.781235e+01	9.282850e+01	1.753550e+01	3.499164e+01	6.631140e+01	6.595272e+01	7.822113e+01	6.866659e+01	1.659596e+02
9.400000e+02	2.369607e+03	3.463771e+02	1.363457e+02	9.015400e+01	1.604380e+02	7.870299e+01	6.259817e+01	8.270376e+01	3.483142e+01	1.015152e+02	1.997745e+01	3.651399e+01	7.017919e+01	6.737475e+01	8.540934e+01	7.503235e+01	1.901352e+02
9.410000e+02	2.463925e+03	3.842559e+02	1.530823e+02	9.688337e+01	1.741805e+02	8.230556e+01	6.788844e+01	9.357275e+01	4.559250e+01	1.074910e+02	2.077169e+01	3.737525e+01	7.611395e+01	6.675130e+01	9.307282e+01	8.111203e+01	2.128317e+02
9.420000e+02	2.542219e+03	4.097465e+02	1.676693e+02	1.020351e+02	1.840281e+02	8.142477e+01	7.175081e+01	1.019602e+02	5.845021e+01	1.092206e+02	1.858350e+01	3.632701e+01	8.345357e+01	6.283332e+01	9.954559e+01	8.448763e+01	2.275286e+02
9.430000e+02	2.591480e+03	4.150869e+02	1.771649e+02	1.039168e+02	1.867706e+02	7.509812e+01	7.297446e+01	1.058474e+02	7.137824e+01	1.057885e+02	1.288181e+01	3.260019e+01	9.103696e+01	5.486659e+01	1.036638e+02	8.311265e+01	2.298461e+02
9.440000e+02	2.600466e+03	3.974205e+02	1.793984e+02	1.014120e+02	1.805977e+02	6.349909e+01	7.123636e+01	1.040461e+02	8.231649e+01	9.708387e+01	4.069185e+00	2.606063e+01	9.734486e+01	4.276646e+01	1.048202e+02	7.578394e+01	2.185432e+02
9.450000e+02	2.562521e+03	3.589296e+02	1.734370e+02	9.413787e+01	1.652001e+02	4.792801e+01	6.691905e+01	9.648857e+01	8.957184e+01	8.386709e+01	-6.657224e+00	1.719069e+01	1.007973e+02	2.711705e+01	1.028572e+02	6.234934e+01	1.954869e+02
9.460000e+02	2.477885e+03	3.056835e+02	1.598530e+02	8.247184e+01	1.415530e+02	3.053902e+01	6.076515e+01	8.429950e+01	9.217189e+01	6.768286e+01	-1.765803e+01	6.919986e+00	1.001324e+02	9.033240e+00	9.790818e+01	4.365076e+01	1.647586e+02
9.470000e+02	2.354557e+03	2.457576e+02	1.406581e+02	6.744121e+01	1.115476e+02	1.386546e+01	5.354236e+01	6.958756e+01	9.005441e+01	5.060505e+01	-2.729597e+01	-3.627192e+00	9.473994e+01	-1.005629e+01	9.028125e+01	2.127129e+01	1.313374e+02
9.480000e+02	2.207225e+03	1.872433e+02	1.188427e+02	5.048532e+01	7.759691e+01	2.572015e-01	4.584148e+01	5.496641e+01	8.400634e+01	3.483714e+01	-3.433527e+01	-1.338835e+01	8.482354e+01	-2.865291e+01	8.042088e+01	-2.820389e+00	9.984671e+01
9.490000e+02	2.054500e+03	1.366023e+02	9.758410e+01	3.312189e+01	4.225910e+01	-8.636433e+00	3.803045e+01	4.289648e+01	7.534293e+01	2.224131e+01	-3.819224e+01	-2.156273e+01	7.131719e+01	-4.542274e+01	6.890784e+01	-2.664676e+01	7.368802e+01
9.500000e+02	1.915304e+03	9.756003e+01	7.931765e+01	1.657495e+01	7.859988e+00	-1.222088e+01	3.029864e+01	3.500910e+01	6.541262e+01	1.390458e+01	-3.899721e+01	-2.773039e+01	5.557526e+01	-5.940073e+01	5.642395e+01	-4.856364e+01	5.463601e+01
9.510000e+02	1.805454e+03	7.054612e+01	6.494428e+01	1.442284e+00	-2.390444e+01	-1.107583e+01	2.269536e+01	3.160036e+01	5.508776e+01	9.855594e+00	-3.749163e+01	-3.189833e+01	3.893707e+01	-7.014847e+01	4.362685e+01	-6.753251e+01	4.277503e+01
9.520000e+02	1.735284e+03	5.264331e+01	5.343990e+01	-1.251271e+01	-5.234350e+01	-6.824090e+00	1.510380e+01	3.145525e+01	4.442221e+01	9.016426e+00	-3.482278e+01	-3.449396e+01	2.231333e+01	-7.784805e+01	3.094460e+01	-8.329059e+01	3.661872e+01
9.530000e+02	1.708667e+03	3.807935e+01	4.203474e+01	-2.637157e+01	-7.799845e+01	-1.783159e+00	7.169677e+00	3.208744e+01	3.261176e+01	9.421537e+00	-3.230155e+01	-3.631531e+01	5.933470e+00	-8.330402e+01	1.837486e+01	-9.637671e+01	3.335242e+01
9.540000e+02	1.723273e+03	1.935949e+01	2.697240e+01	-4.182889e+01	-1.025500e+02	1.533704e+00	-1.728161e+00	3.037236e+01	1.829579e+01	8.675099e+00	-3.116557e+01	-3.842505e+01	-1.065944e+01	-8.781847e+01	5.413850e+00	-1.079678e+02	2.927053e+01
9.550000e+02	1.771646e+03	-1.093133e+01	4.681263e+00	-6.072151e+01	-1.282881e+02	9.781414e-01	-1.236453e+01	2.343401e+01	1.213096e-01	4.558458e+00	-3.236230e+01	-4.196434e+01	-2.835478e+01	-9.291478e+01	-8.783556e+00	-1.195084e+02	2.052217e+01
9.560000e+02	1.842621e+03	-5.787656e+01	-2.695838e+01	-8.439329e+01	-1.571854e+02	-4.716835e+00	-2.537031e+01	9.549208e+00	-2.260936e+01	-4.350484e+00	-3.635775e+01	-4.788051e+01	-4.803044e+01	-9.992824e+01	-2.500339e+01	-1.321856e+02	4.164904e+00
9.570000e+02	1.922839e+03	-1.220823e+02	-6.764364e+01	-1.130552e+02	-1.898351e+02	-1.558267e+01	-4.081733e+01	-1.120699e+01	-4.943201e+01	-1.821308e+01	-4.299289e+01	-5.661242e+01	-7.005654e+01	-1.095504e+02	-4.344735e+01	-1.463906e+02	-2.069324e+01
9.580000e+02	1.998309e+03	-1.984179e+02	-1.143280e+02	-1.453646e+02	-2.246676e+02	-3.033362e+01	-5.785416e+01	-3.680402e+01	-7.855351e+01	-3.577599e+01	-5.143599e+01	-6.783340e+01	-9.392217e+01	-1.214778e+02	-6.329643e+01	-1.613730e+02	-5.207544e+01
9.590000e+02	2.056097e+03	-2.763315e+02	-1.617314e+02	-1.784375e+02	-2.578539e+02	-4.661969e+01	-7.459308e+01	-6.367712e+01	-1.071202e+02	-5.461284e+01	-6.028652e+01	-8.037494e+01	-1.181441e+02	-1.343273e+02	-8.258645e+01	-1.752681e+02	-8.507218e+01
9.600000e+02	2.086086e+03	-3.419627e+02	-2.035898e+02	-2.083882e+02	-2.840700e+02	-6.158305e+01	-8.837353e+01	-8.762347e+01	-1.318671e+02	-7.172440e+01	-6.785071e+01	-9.241294e+01	-1.405305e+02	-1.459070e+02	-9.851541e+01	-1.855541e+02	-1.127477e+02
9.610000e+02	2.082537e+03	-3.815738e+02	-2.342681e+02	-2.312818e+02	-2.979327e+02	-7.257356e+01	-9.636856e+01	-1.048922e+02	-1.499454e+02	-8.432447e+01	-7.253707e+01	-1.018966e+02	-1.587379e+02	-1.537935e+02	-1.081202e+02	-1.898109e+02	-1.278556e+02
9.620000e+02	2.045009e+03	-3.852219e+02	-2.501961e+02	-2.441825e+02	-2.955906e+02	-7.779991e+01	-9.633382e+01	-1.131071e+02	-1.596457e+02	-9.055216e+01	-7.324945e+01	-1.070844e+02	-1.709267e+02	-1.560215e+02	-1.090870e+02	-1.865012e+02	-1.248402e+02
9.630000e+02	1.978211e+03	-3.494075e+02	-2.506309e+02	-2.459041e+02	-2.758501e+02	-7.669862e+01	-8.721578e+01	-1.117236e+02	-1.607651e+02	-8.986728e+01	-6.963322e+01	-1.069883e+02	-1.762653e+02	-1.516285e+02	-1.003854e+02	-1.754617e+02	-1.014380e+02
9.640000e+02	1.890698e+03	-2.778009e+02	-2.375144e+02	-2.371777e+02	-2.404126e+02	-6.990649e+01	-6.939060e+01	-1.019050e+02	-1.545058e+02	-8.300963e+01	-6.208243e+01	-1.015610e+02	-1.750905e+02	-1.408510e+02	-8.249465e+01	-1.579147e+02	-5.932619e+01
9.650000e+02	1.792714e+03	-1.799042e+02	-2.145585e+02	-2.202056e+02	-1.931929e+02	-5.888110e+01	-4.447155e+01	-8.593288e+01	-1.429779e+02	-7.158086e+01	-5.151850e+01	-9.157429e+01	-1.686833e+02	-1.249241e+02	-5.717211e+01	-1.360175e+02	-3.629193e+00
9.660000e+02	1.693894e+03	-6.829358e+01	-1.859816e+02	-1.978354e+02	-1.390845e+02	-4.534793e+01	-1.481120e+01	-6.642563e+01	-1.285289e+02	-5.745220e+01	-3.904823e+01	-7.827554e+01	-1.587844e+02	-1.056093e+02	-2.691614e+01	-1.121652e+02	5.847453e+01
9.670000e+02	1.601531e+03	4.446182e+01	-1.554024e+02	-1.727180e+02	-8.272367e+01	-3.079712e+01	1.706507e+01	-4.567530e+01	-1.131590e+02	-4.224212e+01	-2.564605e+01	-6.298870e+01	-1.470698e+02	-8.466996e+01	5.619523e+00	-8.834022e+01	1.195047e+02
9.680000e+02	1.519905e+03	1.481624e+02	-1.252446e+02	-1.467576e+02	-2.771440e+01	-1.619328e+01	4.887541e+01	-2.530464e+01	-9.820781e+01	-2.703483e+01	-1.196875e+01	-4.681703e+01	-1.347874e+02	-6.350013e+01	3.803342e+01	-6.574508e+01	1.731903e+02
9.690000e+02	1.450710e+03	2.360431e+02	-9.672830e+01	-1.209780e+02	2.351745e+01	-1.944175e+00	7.874771e+01	-6.275003e+00	-8.435089e+01	-1.237488e+01	1.667632e+00	-3.052533e+01	-1.226446e+02	-4.300221e+01	6.831664e+01	-4.479666e+01	2.153207e+02
9.700000e+02	1.394215e+03	3.045734e+02	-7.026056e+01	-9.572019e+01	6.939291e+01	1.193399e+01	1.051787e+02	1.087761e+01	-7.180689e+01	1.549159e+00	1.518936e+01	-1.458346e+01	-1.109088e+02	-2.368016e+01	9.479352e+01	-2.539830e+01	2.438273e+02
9.710000e+02	1.350572e+03	3.525017e+02	-4.592204e+01	-7.098063e+01	1.087142e+02	2.556876e+01	1.269200e+02	2.576725e+01	-6.059144e+01	1.467225e+01	2.861562e+01	7.068461e-01	-9.959558e+01	-5.826294e+00	1.160232e+02	-7.306846e+00	2.582888e+02
9.720000e+02	1.320743e+03	3.798223e+02	-2.378367e+01	-4.669601e+01	1.404003e+02	3.900893e+01	1.429302e+02	3.800042e+01	-5.067154e+01	2.689052e+01	4.192097e+01	1.508630e+01	-8.861632e+01	1.032975e+01	1.308115e+02	9.590716e+00	2.592274e+02
9.730000e+02	1.306733e+03	3.871985e+02	-3.940710e+00	-2.286943e+01	1.635848e+02	5.209609e+01	1.524617e+02	4.719807e+01	-4.195962e+01	3.802120e+01	5.494894e+01	2.826799e+01	-7.781759e+01	2.458672e+01	1.383866e+02	2.520004e+01	2.475564e+02
9.740000e+02	1.311098e+03	3.760095e+02	1.367900e+01	4.610665e-01	1.780047e+02	6.445580e+01	1.552569e+02	5.315518e+01	-3.418696e+01	4.786783e+01	6.739505e+01	3.993659e+01	-6.693295e+01	3.684591e+01	1.386686e+02	3.933764e+01	2.243790e+02
9.750000e+02	1.335990e+03	3.487940e+02	2.955921e+01	2.333036e+01	1.844213e+02	7.559694e+01	1.517478e+02	5.602842e+01	-2.676799e+01	5.632864e+01	7.886097e+01	4.979982e+01	-5.552920e+01	4.722004e+01	1.324793e+02	5.194345e+01	1.911062e+02
9.760000e+02	1.382167e+03	3.096172e+02	4.469735e+01	4.592211e+01	1.847745e+02	8.507636e+01	1.431314e+02	5.643272e+01	-1.877854e+01	6.347698e+01	8.896173e+01	5.765870e+01	-4.303773e+01	5.608113e+01	1.215318e+02	6.324401e+01	1.496777e+02
9.770000e+02	1.448415e+03	2.639092e+02	6.044470e+01	6.853242e+01	1.818814e+02	9.266372e+01	1.312290e+02	5.537239e+01	-9.118935e+00	6.956443e+01	9.744588e+01	6.346233e+01	-2.891100e+01	6.398395e+01	1.081295e+02	7.375293e+01	1.026296e+02
9.780000e+02	1.531676e+03	2.176096e+02	7.810035e+01	9.141157e+01	1.787146e+02	9.843832e+01	1.181316e+02	5.400895e+01	3.160663e+00	7.494025e+01	1.042772e+02	6.732333e+01	-1.286255e+01	7.147100e+01	9.463341e+01	8.408200e+01	5.286426e+01
9.790000e+02	1.627879e+03	1.758632e+02	9.841071e+01	1.145544e+02	1.775233e+02	1.027756e+02	1.057334e+02	5.334369e+01	1.848567e+01	7.992539e+01	1.096397e+02	6.949138e+01	4.918289e+00	7.883637e+01	8.288325e+01	9.464042e+01	3.187271e+00
9.800000e+02	1.733139e+03	1.418289e+02	1.211969e+02	1.375604e+02	1.791715e+02	1.062302e+02	9.532811e+01	5.393631e+01	3.649057e+01	8.470647e+01	1.138660e+02	7.030457e+01	2.369861e+01	8.596182e+01	7.380445e+01	1.053668e+02	-4.415158e+01
9.810000e+02	1.844789e+03	1.162031e+02	1.453002e+02	1.596717e+02	1.830074e+02	1.093716e+02	8.743324e+01	5.577351e+01	5.599196e+01	8.930802e+01	1.173279e+02	7.015045e+01	4.234829e+01	9.231796e+01	6.736983e+01	1.156366e+02	-8.763868e+01
9.820000e+02	1.961760e+03	9.776660e+01	1.689082e+02	1.800174e+02	1.873526e+02	1.126461e+02	8.192184e+01	5.834580e+01	7.524626e+01	9.366142e+01	1.203503e+02	6.946087e+01	5.967191e+01	9.715349e+01	6.293740e+01	1.244135e+02	-1.262564e+02
9.830000e+02	2.084077e+03	8.478121e+01	1.901634e+02	1.979865e+02	1.904208e+02	1.163208e+02	7.839819e+01	6.091003e+01	9.242646e+01	9.773604e+01	1.231836e+02	6.873928e+01	7.480769e+01	9.980918e+01	5.981369e+01	1.306046e+02	-1.589175e+02
9.840000e+02	2.211618e+03	7.660896e+01	2.078270e+02	2.135691e+02	1.912736e+02	1.205127e+02	7.663544e+01	6.284186e+01	1.061642e+02	1.016614e+02	1.260354e+02	6.859020e+01	8.753829e+01	1.000333e+02	5.778450e+01	1.334862e+02	-1.838841e+02
9.850000e+02	2.342585e+03	7.475766e+01	2.217430e+02	2.275006e+02	1.904008e+02	1.252615e+02	7.685723e+01	6.394461e+01	1.159708e+02	1.057705e+02	1.291159e+02	6.970847e+01	9.838898e+01	9.816971e+01	5.736664e+01	1.330309e+02	-1.985523e+02
9.860000e+02	2.472340e+03	8.276698e+01	2.329220e+02	2.411224e+02	1.896744e+02	1.305895e+02	7.971986e+01	6.459442e+01	1.223871e+02	1.105328e+02	1.326540e+02	7.280085e+01	1.084721e+02	9.514222e+01	5.966366e+01	1.300075e+02	-1.998581e+02
9.870000e+02	2.593142e+03	1.048630e+02	2.432085e+02	2.559891e+02	1.917064e+02	1.365141e+02	8.600270e+01	6.566204e+01	1.268029e+02	1.164032e+02	1.368617e+02	7.844834e+01	1.191307e+02	9.223882e+01	6.589238e+01	1.258109e+02	-1.852806e+02
9.880000e+02	2.695092e+03	1.438877e+02	2.546544e+02	2.733659e+02	1.988850e+02	1.430196e+02	9.615993e+01	6.823661e+01	1.309985e+02	1.236534e+02	1.418685e+02	8.695340e+01	1.315000e+02	9.077641e+01	7.679443e+01	1.220877e+02	-1.541105e+02
9.890000e+02	2.768143e+03	1.993736e+02	2.688163e+02	2.937877e+02	2.124785e+02	1.500203e+02	1.099508e+02	7.325313e+01	1.365568e+02	1.322569e+02	1.476660e+02	9.822916e+01	1.461236e+02	9.175912e+01	9.218814e+01	1.202876e+02	-1.084657e+02
9.900000e+02	2.804600e+03	2.666015e+02	2.862048e+02	3.168109e+02	2.321317e+02	1.573433e+02	1.263140e+02	8.115780e+01	1.443360e+02	1.418661e+02	1.540859e+02	1.117678e+02	1.627262e+02	9.562827e+01	1.108377e+02	1.212912e+02	-5.356594e+01
9.910000e+02	2.801256e+03	3.370666e+02	3.060311e+02	3.409925e+02	2.558804e+02	1.647241e+02	1.435230e+02	9.171989e+01	1.541621e+02	1.518664e+02	1.608065e+02	1.266844e+02	1.801866e+02	1.021512e+02	1.306663e+02	1.252112e+02	2.965507e+00
9.920000e+02	2.760396e+03	4.001910e+02	3.262772e+02	3.640444e+02	2.805924e+02	1.717835e+02	1.595264e+02	1.040285e+02	1.648213e+02	1.614534e+02	1.673519e+02	1.417981e+02	1.966925e+02	1.104415e+02	1.491973e+02	1.313921e+02	5.262815e+01
9.930000e+02	2.689314e+03	4.456418e+02	3.440147e+02	3.830856e+02	3.026075e+02	1.779589e+02	1.723168e+02	1.166389e+02	1.743292e+02	1.696832e+02	1.730614e+02	1.557115e+02	2.100237e+02	1.190730e+02	1.640421e+02	1.385622e+02	8.792837e+01
9.940000e+02	2.598590e+03	4.654710e+02	3.558663e+02	3.949522e+02	3.183501e+02	1.824102e+02	1.802093e+02	1.277947e+02	1.803834e+02	1.754807e+02	1.770493e+02	1.668817e+02	2.179022e+02	1.262588e+02	1.732808e+02	1.450662e+02	1.040178e+02
9.950000e+02	2.499790e+03	4.555025e+02	3.585303e+02	3.965860e+02	3.248034e+02	1.839747e+02	1.819980e+02	1.356685e+02	1.808759e+02	1.776525e+02	1.782192e+02	1.737252e+02	2.183663e+02	1.300893e+02	1.756769e+02	1.491237e+02	9.960607e+01
9.960000e+02	2.403390e+03	4.157983e+02	3.493341e+02	3.855401e+02	3.198623e+02	1.812670e+02	1.770470e+02	1.386054e+02	1.743558e+02	1.749765e+02	1.754043e+02	1.748125e+02	2.101356e+02	1.288430e+02	1.707578e+02	1.491023e+02	7.697099e+01
9.970000e+02	2.317401e+03	3.503896e+02	3.267915e+02	3.605834e+02	3.026462e+02	1.729735e+02	1.653829e+02	1.353846e+02	1.603647e+02	1.664251e+02	1.676550e+02	1.691782e+02	1.929290e+02	1.213598e+02	1.588357e+02	1.438089e+02	4.121834e+01
9.980000e+02	2.246804e+03	2.665833e+02	2.910949e+02	3.222808e+02	2.738007e+02	1.582963e+02	1.478045e+02	1.254993e+02	1.395930e+02	1.515000e+02	1.546094e+02	1.566876e+02	1.676728e+02	1.074152e+02	1.410095e+02	1.327904e+02	-8.673838e-01
9.990000e+02	2.193586e+03	1.740447e+02	2.444141e+02	2.733359e+02	2.357066e+02	1.374013e+02	1.259476e+02	1.094039e+02	1.138326e+02	1.305794e+02	1.368118e+02	1.383290e+02	1.365262e+02	8.798244e+01	1.191270e+02	1.165796e+02	-4.204425e+01
1.000000e+03	2.157115e+03	8.366418e+01	1.908477e+02	2.184877e+02	1.924255e+02	1.116861e+02	1.022018e+02	8.863217e+01	8.572265e+01	1.051224e+02	1.158308e+02	1.162762e+02	1.026594e+02	6.525250e+01	9.563939e+01	9.678658e+01	-7.571512e+01
1.001000e+03	2.134683e+03	6.118158e+00	1.359303e+02	1.638679e+02	1.492328e+02	8.372193e+01	7.940865e+01	6.568472e+01	5.832309e+01	7.760408e+01	9.408813e+01	9.362661e+01	6.978203e+01	4.234001e+01	7.329206e+01	7.594138e+01	-9.686955e+01
1.002000e+03	2.122195e+03	-4.986752e+01	8.572299e+01	1.159044e+02	1.117238e+02	5.683604e+01	6.036225e+01	4.364980e+01	3.458301e+01	5.113623e+01	7.441451e+01	7.383529e+01	4.149135e+01	2.270057e+01	5.466354e+01	5.706064e+01	-1.028703e+02
1.003000e+03	2.114972e+03	-7.929788e+01	4.565896e+01	8.002872e+01	8.466632e+01	3.443054e+01	4.722827e+01	2.561296e+01	1.680248e+01	2.885215e+01	5.944729e+01	5.998600e+01	2.058152e+01	9.396945e+00	4.165076e+01	4.301530e+01	-9.401574e+01
1.004000e+03	2.108601e+03	-8.224210e+01	1.942787e+01	5.953125e+01	7.091588e+01	1.922859e+01	4.105326e+01	1.400284e+01	6.196286e+00	1.322681e+01	5.104214e+01	5.410816e+01	8.487409e+00	4.415186e+00	3.505209e+01	3.586247e+01	-7.369489e+01
1.005000e+03	2.099661e+03	-6.416020e+01	8.203308e+00	5.488100e+01	7.072932e+01	1.266687e+01	4.152022e+01	1.005664e+01	2.660319e+00	5.537970e+00	4.986215e+01	5.673453e+01	5.015139e+00	8.222240e+00	3.439166e+01	3.633500e+01	-4.791454e+01
1.006000e+03	2.086152e+03	-3.485733e+01	1.044400e+01	6.369796e+01	8.170021e+01	1.460493e+01	4.703267e+01	1.355998e+01	4.809036e+00	5.629994e+00	5.525035e+01	6.681213e+01	8.441906e+00	1.967719e+01	3.805780e+01	4.363823e+01	-2.409059e+01
1.007000e+03	2.067571e+03	-6.131261e+00	2.233862e+01	8.137606e+01	9.933387e+01	2.341944e+01	5.510593e+01	2.293107e+01	1.029657e+01	1.203748e+01	6.540363e+01	8.196456e+01	1.596497e+01	3.629495e+01	4.372381e+01	5.560438e+01	-9.253361e+00
1.008000e+03	2.044670e+03	1.129705e+01	3.876504e+01	1.021636e+02	1.180695e+02	3.643030e+01	6.294604e+01	3.561143e+01	1.635797e+01	2.240323e+01	7.777976e+01	9.900389e+01	2.437496e+01	5.476043e+01	4.891864e+01	6.914386e+01	-8.117387e+00
1.009000e+03	2.019046e+03	1.059182e+01	5.447021e+01	1.203807e+02	1.324258e+02	5.051044e+01	6.803896e+01	4.863648e+01	2.043327e+01	3.403412e+01	8.961105e+01	1.145390e+02	3.075994e+01	7.154060e+01	5.156222e+01	8.085579e+01	-2.165701e+01
1.010000e+03	1.992719e+03	-9.649579e+00	6.512012e+01	1.314442e+02	1.379535e+02	6.269622e+01	6.858064e+01	5.922231e+01	2.070057e+01	4.441796e+01	9.838878e+01	1.255367e+02	3.304528e+01	8.345505e+01	5.030190e+01	8.764344e+01	-4.677170e+01
1.011000e+03	1.967770e+03	-4.566662e+01	6.795669e+01	1.324829e+02	1.318135e+02	7.065471e+01	6.365768e+01	6.523318e+01	1.637544e+01	5.158096e+01	1.022246e+02	1.297483e+02	3.024820e+01	8.812451e+01	4.458343e+01	8.722233e+01	-7.727437e+01
1.012000e+03	1.946054e+03	-9.041881e+01	6.199213e+01	1.225206e+02	1.130013e+02	7.295297e+01	5.320796e+01	6.546819e+01	7.727997e+00	5.426508e+01	1.000658e+02	1.259847e+02	2.244512e+01	8.428321e+01	3.451958e+01	7.847497e+01	-1.059060e+02
1.013000e+03	1.928915e+03	-1.361655e+02	4.786700e+01	1.023649e+02	8.236893e+01	6.916277e+01	3.788591e+01	5.978025e+01	-4.118956e+00	5.198796e+01	9.179961e+01	1.142658e+02	1.055643e+01	7.197294e+01	2.071063e+01	6.165313e+01	-1.266164e+02
1.014000e+03	1.916899e+03	-1.765738e+02	2.757892e+01	7.438624e+01	4.259149e+01	5.986873e+01	1.896545e+01	4.907182e+01	-1.748275e+01	4.506445e+01	7.828925e+01	9.586684e+01	-3.910911e+00	5.261694e+01	4.160725e+00	3.842758e+01	-1.362162e+02
1.015000e+03	1.909540e+03	-2.075701e+02	4.210406e+00	4.227069e+01	-1.932904e+00	4.661096e+01	-1.680098e+00	3.518546e+01	-3.039699e+01	3.461064e+01	6.133738e+01	7.323401e+01	-1.907349e+01	2.892057e+01	-1.368083e+01	1.174696e+01	-1.348032e+02
1.016000e+03	1.905360e+03	-2.269570e+02	-1.838631e+01	1.067004e+01	-4.543501e+01	3.172028e+01	-2.161673e+01	2.065592e+01	-4.084724e+01	2.246436e+01	4.350997e+01	4.970143e+01	-3.284563e+01	4.515867e+00	-3.087306e+01	-1.456073e+01	-1.249603e+02
1.017000e+03	1.902226e+03	-2.335383e+02	-3.610653e+01	-1.541814e+01	-8.160057e+01	1.796412e+01	-3.807453e+01	8.273453e+00	-4.702045e+01	1.091735e+01	2.773956e+01	2.895206e+01	-4.316240e+01	-1.669180e+01	-4.512173e+01	-3.647565e+01	-1.102834e+02
1.018000e+03	1.898051e+03	-2.266639e+02	-4.541543e+01	-3.161836e+01	-1.049016e+02	7.970027e+00	-4.845930e+01	4.675425e-01	-4.762591e+01	2.213768e+00	1.670055e+01	1.425585e+01	-4.832284e+01	-3.139587e+01	-5.421601e+01	-5.068087e+01	-9.401821e+01
1.019000e+03	1.891638e+03	-2.066383e+02	-4.435285e+01	-3.533024e+01	-1.121224e+02	3.525681e+00	-5.106637e+01	-1.359312e+00	-4.226256e+01	-2.087142e+00	1.208906e+01	7.655372e+00	-4.742271e+01	-3.775105e+01	-5.667967e+01	-5.543685e+01	-7.836851e+01
1.020000e+03	1.883373e+03	-1.756578e+02	-3.334845e+01	-2.665763e+01	-1.034899e+02	4.991890e+00	-4.572306e+01	2.687917e+00	-3.169850e+01	-1.646900e+00	1.406274e+01	9.371353e+00	-4.072356e+01	-3.591221e+01	-5.236236e+01	-5.112082e+01	-6.455998e+01
1.021000e+03	1.875472e+03	-1.384281e+02	-1.539710e+01	-8.642503e+00	-8.282209e+01	1.110467e+01	-3.402962e+01	1.094110e+01	-1.788169e+01	2.487608e+00	2.110821e+01	1.768853e+01	-2.975399e+01	-2.798933e+01	-4.264721e+01	-4.016765e+01	-5.332148e+01
1.022000e+03	1.871674e+03	-1.016997e+02	4.657185e+00	1.345460e+01	-5.645793e+01	1.932729e+01	-1.900580e+01	2.064013e+01	-3.573420e+00	8.233691e+00	3.046531e+01	2.943028e+01	-1.701429e+01	-1.735952e+01	-3.009991e+01	-2.635025e+01	-4.531065e+01
1.023000e+03	1.876490e+03	-7.259413e+01	2.157855e+01	3.367541e+01	-3.127138e+01	2.668064e+01	-4.216867e+00	2.880717e+01	8.337698e+00	1.324409e+01	3.900153e+01	4.089645e+01	-5.330131e+00	-7.544526e+00	-1.765391e+01	-1.360906e+01	-4.118460e+01
1.024000e+03	1.894283e+03	-5.633387e+01	3.140207e+01	4.714357e+01	-1.251705e+01	3.075028e+01	7.300160e+00	3.320426e+01	1.561497e+01	1.579058e+01	4.421809e+01	4.893775e+01	2.921051e+00	-1.065273e+00	-7.660014e+00	-4.847838e+00	-4.131872e+01
1.025000e+03	1.928462e+03	-5.437475e+01	3.262796e+01	5.141293e+01	-2.346869e+00	3.047024e+01	1.389876e+01	3.300060e+01	1.725140e+01	1.538039e+01	4.499696e+01	5.177711e+01	6.411260e+00	1.286407e+00	-1.191553e+00	-1.145271e+00	-4.539503e+01
1.026000e+03	1.981010e+03	-6.375900e+01	2.647103e+01	4.687889e+01	4.650691e-01	2.637601e+01	1.566807e+01	2.890024e+01	1.362785e+01	1.284748e+01	4.180908e+01	4.929924e+01	5.065057e+00	4.880501e-01	2.139053e+00	-1.663233e+00	-5.211127e+01
1.027000e+03	2.052350e+03	-7.792648e+01	1.611911e+01	3.616877e+01	-4.152840e-01	2.025438e+01	1.418572e+01	2.271615e+01	6.217202e+00	9.906845e+00	3.633975e+01	4.275659e+01	-1.754813e-01	-1.342524e+00	3.837626e+00	-4.241841e+00	-5.915617e+01
1.028000e+03	2.141454e+03	-8.860816e+01	5.383182e+00	2.286331e+01	-5.532687e-01	1.437385e+01	1.183291e+01	1.660135e+01	-3.007460e+00	8.396374e+00	3.072845e+01	3.407196e+01	-7.869075e+00	-1.955387e+00	5.854762e+00	-6.397251e+00	-6.347144e+01
1.029000e+03	2.246004e+03	-8.808423e+01	-2.664851e+00	1.013935e+01	3.549965e+00	1.063394e+01	1.095604e+01	1.225636e+01	-1.219880e+01	9.540614e+00	2.675585e+01	2.505080e+01	-1.661961e+01	6.673326e-02	9.861881e+00	-6.302146e+00	-6.175610e+01
1.030000e+03	2.362539e+03	-7.110269e+01	-6.551353e+00	-1.304118e-01	1.332598e+01	9.965953e+00	1.316173e+01	1.039477e+01	-2.006151e+01	1.351780e+01	2.529106e+01	1.680584e+01	-2.542356e+01	4.756140e+00	1.671257e+01	-3.378526e+00	-5.114583e+01
1.031000e+03	2.486614e+03	-3.599947e+01	-6.533152e+00	-7.564578e+00	2.788145e+01	1.217657e+01	1.894124e+01	1.061119e+01	-2.597410e+01	1.944948e+01	2.616761e+01	9.569974e+00	-3.373315e+01	1.079365e+01	2.621301e+01	1.674271e+00	-2.996094e+01
1.032000e+03	2.613066e+03	1.514362e+01	-4.106475e+00	-1.283162e+01	4.456552e+01	1.622976e+01	2.769090e+01	1.163596e+01	-2.985236e+01	2.575503e+01	2.846751e+01	2.901433e+00	-4.129895e+01	1.606155e+01	3.721498e+01	7.353892e+00	1.660301e+00
1.033000e+03	2.736418e+03	7.722719e+01	-1.206119e+00	-1.689994e+01	6.005262e+01	2.079887e+01	3.807092e+01	1.184366e+01	-3.189495e+01	3.069817e+01	3.104203e+01	-3.858725e+00	-4.794078e+01	1.846521e+01	4.796906e+01	1.208448e+01	4.148652e+01
1.034000e+03	2.851296e+03	1.434982e+02	5.610432e-01	-2.034831e+01	7.151732e+01	2.484529e+01	4.855071e+01	9.830226e+00	-3.235552e+01	3.292552e+01	3.303820e+01	-1.108644e+01	-5.338453e+01	1.670236e+01	5.662995e+01	1.488623e+01	8.547441e+01
1.035000e+03	2.952662e+03	2.071646e+02	4.131077e-01	-2.299262e+01	7.750550e+01	2.800435e+01	5.794125e+01	4.881871e+00	-3.141877e+01	3.183987e+01	3.423522e+01	-1.852956e+01	-5.722539e+01	1.070854e+01	6.177606e+01	1.572679e+01	1.286183e+02
1.036000e+03	3.035777e+03	2.627988e+02	-1.456414e+00	-2.390329e+01	7.824147e+01	3.065799e+01	6.572802e+01	-2.790222e+00	-2.917586e+01	2.772595e+01	3.509419e+01	-2.524104e+01	-5.899501e+01	1.643584e+00	6.279564e+01	1.544236e+01	1.661211e+02
1.037000e+03	3.096020e+03	3.071166e+02	-4.025584e+00	-2.173342e+01	7.531085e+01	3.370321e+01	7.209490e+01	-1.209856e+01	-2.564649e+01	2.162556e+01	3.653950e+01	-2.980867e+01	-5.827092e+01	-8.548191e+00	6.001734e+01	1.528992e+01	1.944549e+02
1.038000e+03	3.128884e+03	3.389259e+02	-5.779050e+00	-1.520035e+01	7.087150e+01	3.813648e+01	7.764980e+01	-2.137596e+01	-2.079943e+01	1.502306e+01	3.957812e+01	-3.079818e+01	-5.477736e+01	-1.782746e+01	5.453688e+01	1.633149e+01	2.118981e+02
1.039000e+03	3.130401e+03	3.583699e+02	-5.117137e+00	-3.558531e+00	6.670656e+01	4.462896e+01	8.298194e+01	-2.881447e+01	-1.455965e+01	9.443316e+00	4.490177e+01	-2.725585e+01	-4.846038e+01	-2.474712e+01	4.779718e+01	1.890712e+01	2.183738e+02
1.040000e+03	3.098023e+03	3.658942e+02	-7.462844e-01	1.306416e+01	6.348706e+01	5.325003e+01	8.824906e+01	-3.290778e+01	-6.823834e+00	6.076782e+00	5.260306e+01	-1.909687e+01	-3.954025e+01	-2.889902e+01	4.107698e+01	2.240891e+01	2.147574e+02
1.041000e+03	3.031624e+03	3.614833e+02	8.018281e+00	3.354896e+01	6.052833e+01	6.341993e+01	9.297730e+01	-3.277331e+01	2.489673e+00	5.526693e+00	6.208490e+01	-7.242065e+00	-2.853841e+01	-3.097585e+01	3.508542e+01	2.544282e+01	2.020732e+02
1.042000e+03	2.934181e+03	3.445623e+02	2.108582e+01	5.592047e+01	5.613169e+01	7.407332e+01	9.616378e+01	-2.828514e+01	1.335391e+01	7.729297e+00	7.217449e+01	6.550007e+00	-1.625726e+01	-3.244190e+01	2.982123e+01	2.631125e+01	1.810246e+02
1.043000e+03	2.811800e+03	3.146165e+02	3.758287e+01	7.770683e+01	4.837386e+01	8.393929e+01	9.664173e+01	-2.001901e+01	2.553722e+01	1.204276e+01	8.139109e+01	2.010538e+01	-3.687770e+00	-3.493893e+01	2.474669e+01	2.362849e+01	1.520866e+02
1.044000e+03	2.673029e+03	2.722086e+02	5.599687e+01	9.643640e+01	3.603261e+01	9.182107e+01	9.355819e+01	-9.065799e+00	3.853973e+01	1.745430e+01	8.827774e+01	3.137418e+01	8.155357e+00	-3.963764e+01	1.919290e+01	1.684111e+01	1.160650e+02
1.045000e+03	2.527682e+03	2.198610e+02	7.442911e+01	1.101341e+02	1.928632e+01	9.679045e+01	8.676993e+01	3.208878e+00	5.159389e+01	2.283265e+01	9.170158e+01	3.891443e+01	1.842978e+01	-4.675574e+01	1.281354e+01	6.473763e+00	7.476533e+01
1.046000e+03	2.385523e+03	1.623073e+02	9.089529e+01	1.176754e+02	-8.783516e-02	9.827430e+01	7.699868e+01	1.539437e+01	6.373565e+01	2.715751e+01	9.105196e+01	4.217531e+01	2.662161e+01	-5.540390e+01	5.883223e+00	-5.970963e+00	3.135047e+01
1.047000e+03	2.255110e+03	1.058792e+02	1.036135e+02	1.189058e+02	-1.910506e+01	9.606294e+01	6.568341e+01	2.622005e+01	7.393019e+01	2.968166e+01	8.630831e+01	4.151330e+01	3.259650e+01	-6.381185e+01	-6.966219e-01	-1.840963e+01	-9.889266e+00
1.048000e+03	2.142966e+03	5.715117e+01	1.112362e+02	1.145145e+02	-3.442626e+01	9.028790e+01	5.458271e+01	3.468881e+01	8.122514e+01	3.001007e+01	7.799089e+01	3.796786e+01	3.652338e+01	-6.986320e+01	-5.693990e+00	-2.873502e+01	-4.435461e+01
1.049000e+03	2.053106e+03	2.128727e+01	1.130052e+02	1.057370e+02	-4.337837e+01	8.139651e+01	4.527085e+01	4.016189e+01	8.490244e+01	2.810232e+01	6.703111e+01	3.289411e+01	3.870622e+01	-7.176562e+01	-8.022348e+00	-3.536046e+01	-6.827051e+01
1.050000e+03	1.986880e+03	6.851729e-01	1.088199e+02	9.400190e+01	-4.478150e+01	7.011656e+01	3.870646e+01	4.239506e+01	8.460297e+01	2.421712e+01	5.460119e+01	2.757674e+01	3.940132e+01	-6.863375e+01	-7.192163e+00	-3.759538e+01	-7.970039e+01
1.051000e+03	1.943090e+03	-5.551254e+00	9.922332e+01	8.063602e+01	-3.928313e+01	5.738576e+01	3.502391e+01	4.152300e+01	8.040149e+01	1.882259e+01	4.193445e+01	2.293448e+01	3.870225e+01	-6.078398e+01	-3.538654e+00	-3.575187e+01	-7.903016e+01
1.052000e+03	1.918410e+03	-1.061628e+00	8.531495e+01	6.670221e+01	-2.907046e+01	4.423403e+01	3.361676e+01	3.799728e+01	7.281723e+01	1.249902e+01	3.015953e+01	1.938230e+01	3.654329e+01	-4.963354e+01	1.882110e+00	-3.096087e+01	-6.871027e+01
1.053000e+03	1.908195e+03	9.240570e+00	6.861638e+01	5.298950e+01	-1.705769e+01	3.164186e+01	3.347719e+01	3.249953e+01	6.275824e+01	5.859918e+00	2.017105e+01	1.686944e+01	3.281895e+01	-3.723277e+01	7.695373e+00	-2.476168e+01	-5.234701e+01
1.054000e+03	1.907707e+03	2.101457e+01	5.092043e+01	4.012914e+01	-5.844696e+00	2.042632e+01	3.366040e+01	2.586032e+01	5.141289e+01	-4.903119e-01	1.255977e+01	1.506506e+01	2.756981e+01	-2.559315e+01	1.274367e+01	-1.859664e+01	-3.351351e+01
1.055000e+03	1.913578e+03	3.198593e+01	3.415074e+01	2.877811e+01	3.166510e+00	1.120413e+01	3.369444e+01	1.900419e+01	4.011280e+01	-5.959651e+00	7.617725e+00	1.362713e+01	2.116087e+01	-1.604793e+01	1.653038e+01	-1.337120e+01	-1.477670e+01
1.056000e+03	1.925025e+03	4.247896e+01	2.024081e+01	1.979801e+01	1.017565e+01	4.443030e+00	3.377659e+01	1.291591e+01	3.019376e+01	-9.950388e+00	5.413400e+00	1.246861e+01	1.438531e+01	-8.866390e+00	1.938279e+01	-9.213040e+00	2.664410e+00
1.057000e+03	1.944161e+03	5.478689e+01	1.102075e+01	1.435810e+01	1.678184e+01	5.617268e-01	3.468328e+01	8.600242e+00	2.287502e+01	-1.185167e+01	5.905018e+00	1.193341e+01	8.454170e+00	-3.242391e+00	2.226946e+01	-5.491904e+00	1.862762e+01
1.058000e+03	1.974924e+03	7.169519e+01	8.088050e+00	1.390294e+01	2.528661e+01	5.159028e-03	3.743882e+01	7.005059e+00	1.916579e+01	-1.107519e+01	9.040251e+00	1.281643e+01	4.864314e+00	2.360347e+00	2.635806e+01	-1.074188e+00	3.313271e+01
1.059000e+03	2.020769e+03	9.484764e+01	1.264100e+01	1.994836e+01	3.778689e+01	3.226825e+00	4.288461e+01	8.898961e+00	1.979436e+01	-7.150958e+00	1.479075e+01	1.620376e+01	5.159851e+00	9.640059e+00	3.250647e+01	5.278909e+00	4.560052e+01
1.060000e+03	2.081952e+03	1.236841e+02	2.526975e+01	3.370872e+01	5.538071e+01	1.055276e+01	5.132082e+01	1.472351e+01	2.514522e+01	1.267159e-01	2.309386e+01	2.316106e+01	1.061772e+01	1.985383e+01	4.089449e+01	1.448545e+01	5.452592e+01
1.061000e+03	2.153706e+03	1.553694e+02	4.572893e+01	5.561694e+01	7.771926e+01	2.196129e+01	6.234474e+01	2.445989e+01	3.518914e+01	1.054170e+01	3.371429e+01	3.434770e+01	2.190602e+01	3.335465e+01	5.092493e+01	2.679382e+01	5.782534e+01
1.062000e+03	2.226349e+03	1.856449e+02	7.275022e+01	8.486620e+01	1.029883e+02	3.686165e+01	7.491388e+01	3.754997e+01	4.940599e+01	2.334585e+01	4.607988e+01	4.966689e+01	3.878998e+01	4.938665e+01	6.139788e+01	4.158975e+01	5.369531e+01
1.063000e+03	2.287514e+03	2.101329e+02	1.039816e+02	1.191492e+02	1.282673e+02	5.397205e+01	8.757166e+01	5.289868e+01	6.672645e+01	3.725646e+01	5.917049e+01	6.806813e+01	5.998235e+01	6.618395e+01	7.085585e+01	5.741046e+01	4.154443e+01
1.064000e+03	2.325677e+03	2.254942e+02	1.361410e+02	1.547598e+02	1.501401e+02	7.137614e+01	9.873175e+01	6.896847e+01	8.554261e+01	5.059946e+01	7.153481e+01	8.758961e+01	8.322823e+01	8.134587e+01	7.795477e+01	7.218396e+01	2.252008e+01
1.065000e+03	2.333573e+03	2.300197e+02	1.654308e+02	1.871314e+02	1.654076e+02	8.678392e+01	1.069351e+02	8.396446e+01	1.038395e+02	6.159232e+01	8.147462e+01	1.056671e+02	1.056591e+02	9.239719e+01	8.174306e+01	8.366296e+01	-6.445909e-01
1.066000e+03	2.310186e+03	2.235813e+02	1.881782e+02	2.117357e+02	1.717611e+02	9.795585e+01	1.110440e+02	9.609695e+01	1.194696e+02	6.870972e+01	8.737818e+01	1.196558e+02	1.243587e+02	9.739226e+01	8.179735e+01	8.996212e+01	-2.440654e+01
1.067000e+03	2.260760e+03	2.071749e+02	2.015714e+02	2.251169e+02	1.682869e+02	1.031892e+02	1.103820e+02	1.038900e+02	1.305367e+02	7.103613e+01	8.812332e+01	1.274354e+02	1.369934e+02	9.540395e+01	7.822821e+01	9.005725e+01	-4.547159e+01
1.068000e+03	2.195099e+03	1.824186e+02	2.043010e+02	2.257524e+02	1.557013e+02	1.017336e+02	1.048359e+02	1.064810e+02	1.358012e+02	6.850188e+01	8.342962e+01	1.279304e+02	1.423211e+02	8.676513e+01	7.160344e+01	8.409666e+01	-6.169236e+01
1.069000e+03	2.124929e+03	1.512863e+02	1.969152e+02	2.144690e+02	1.362604e+02	9.401129e+01	9.491994e+01	1.038382e+02	1.349890e+02	6.192912e+01	7.403696e+01	1.213877e+02	1.404289e+02	7.300303e+01	6.283704e+01	7.342243e+01	-7.246586e+01
1.070000e+03	2.061143e+03	1.161498e+02	1.817680e+02	1.942780e+02	1.133629e+02	8.156887e+01	8.177155e+01	9.682423e+01	1.289010e+02	5.287093e+01	6.163170e+01	1.093275e+02	1.326419e+02	5.649954e+01	5.307299e+01	6.028907e+01	-7.852736e+01
1.071000e+03	2.011488e+03	7.999592e+01	1.625565e+02	1.696788e+02	9.093259e+01	6.676333e+01	6.704673e+01	8.706499e+01	1.192734e+02	4.328789e+01	4.851922e+01	9.417829e+01	1.211541e+02	3.998756e+01	4.357087e+01	4.736070e+01	-8.128751e+01
1.072000e+03	1.979026e+03	4.656005e+01	1.435514e+02	1.456334e+02	7.271465e+01	5.226259e+01	5.270012e+01	7.663671e+01	1.084089e+02	3.514825e+01	3.712365e+01	7.870764e+01	1.085035e+02	2.602304e+01	3.558565e+01	3.712746e+01	-8.202244e+01
1.073000e+03	1.961626e+03	2.012931e+01	1.287054e+02	1.264885e+02	6.161892e+01	4.048994e+01	4.067113e+01	6.763795e+01	9.866506e+01	3.004676e+01	2.945088e+01	6.540856e+01	9.703084e+01	1.654956e+01	3.022818e+01	3.138836e+01	-8.125673e+01
1.074000e+03	1.952703e+03	4.887298e+00	1.208332e+02	1.151008e+02	5.921103e+01	3.314838e+01	3.252943e+01	6.174773e+01	9.192328e+01	2.891674e+01	2.665783e+01	5.600205e+01	8.843604e+01	1.261829e+01	2.829840e+01	3.090915e+01	-7.858193e+01
1.075000e+03	1.943215e+03	3.876908e+00	1.210334e+02	1.123388e+02	6.541137e+01	3.092793e+01	2.915247e+01	5.987266e+01	8.916421e+01	3.187607e+01	2.883243e+01	5.116460e+01	8.349950e+01	1.427383e+01	3.010158e+01	3.530511e+01	-7.297129e+01
1.076000e+03	1.924517e+03	1.786939e+01	1.284558e+02	1.170263e+02	7.843820e+01	3.344356e+01	3.051154e+01	6.195923e+01	9.024556e+01	3.821678e+01	3.502287e+01	5.051690e+01	8.199700e+01	2.058894e+01	3.528602e+01	4.314630e+01	-6.344844e+01
1.077000e+03	1.891219e+03	4.456593e+01	1.404529e+02	1.262979e+02	9.502243e+01	3.939459e+01	3.563032e+01	6.700633e+01	9.392906e+01	4.652974e+01	4.348813e+01	5.283983e+01	8.280416e+01	2.983055e+01	4.276691e+01	5.224863e+01	-4.981739e+01
1.078000e+03	1.843045e+03	7.854002e+01	1.530885e+02	1.362607e+02	1.109076e+02	4.689221e+01	4.274753e+01	7.327246e+01	9.814624e+01	5.494714e+01	5.209337e+01	5.643504e+01	8.416277e+01	3.974567e+01	5.080396e+01	6.009603e+01	-3.312512e+01
1.079000e+03	1.784979e+03	1.121269e+02	1.619180e+02	1.428143e+02	1.216053e+02	5.387694e+01	4.966663e+01	7.863919e+01	1.004437e+02	6.147806e+01	5.875296e+01	5.952814e+01	8.405809e+01	4.795076e+01	5.726917e+01	6.432820e+01	-1.562897e+01
1.080000e+03	1.725665e+03	1.371408e+02	1.629108e+02	1.424707e+02	1.233047e+02	5.854139e+01	5.422262e+01	8.106753e+01	9.851597e+01	6.439729e+01	6.182849e+01	6.062244e+01	8.064034e+01	5.238200e+01	6.007976e+01	6.321710e+01	-2.414695e-01
1.081000e+03	1.674732e+03	1.469773e+02	1.533474e+02	1.330322e+02	1.137583e+02	5.968183e+01	5.475916e+01	7.906293e+01	9.072277e+01	6.262589e+01	6.041306e+01	5.874490e+01	7.261855e+01	5.172928e+01	5.770418e+01	5.604680e+01	1.035793e+01
1.082000e+03	1.640094e+03	1.384744e+02	1.325097e+02	1.140275e+02	9.292554e+01	5.691988e+01	5.050437e+01	7.205037e+01	7.648927e+01	5.602058e+01	5.446494e+01	5.356704e+01	5.956292e+01	4.575257e+01	4.960571e+01	4.331332e+01	1.461546e+01
1.083000e+03	1.626133e+03	1.129415e+02	1.019934e+02	8.684761e+01	6.317650e+01	5.075850e+01	4.176203e+01	6.056210e+01	5.650814e+01	4.548458e+01	4.478329e+01	4.541641e+01	4.206542e+01	3.538600e+01	3.648842e+01	2.668255e+01	1.266368e+01
1.084000e+03	1.633215e+03	7.600715e+01	6.552857e+01	5.456217e+01	2.895163e+01	4.246370e+01	2.988255e+01	4.616988e+01	3.268859e+01	3.283861e+01	3.284183e+01	3.520444e+01	2.172183e+01	2.257719e+01	2.025742e+01	8.689691e+00	6.338134e+00
1.085000e+03	1.658417e+03	3.631020e+01	2.829724e+01	2.142766e+01	-4.084399e+00	3.379580e+01	1.702902e+01	3.115689e+01	7.843843e+00	2.045157e+01	2.051286e+01	2.428874e+01	9.164318e-01	9.880705e+00	3.684465e+00	-7.772438e+00	-1.360166e+00
1.086000e+03	1.696986e+03	3.430230e+00	-4.117291e+00	-7.848797e+00	-3.020382e+01	2.664906e+01	5.794389e+00	1.800623e+01	-1.483082e+01	1.071139e+01	9.730813e+00	1.427651e+01	-1.757801e+01	-9.937355e-02	-1.014386e+01	-2.006274e+01	-7.163523e+00
1.087000e+03	1.743949e+03	-1.430697e+01	-2.688587e+01	-2.896304e+01	-4.479250e+01	2.268740e+01	-1.249962e+00	8.852483e+00	-3.237300e+01	5.484732e+00	2.160316e+00	6.777515e+00	-3.112186e+01	-5.269088e+00	-1.845339e+01	-2.634129e+01	-8.477275e+00
1.088000e+03	1.795442e+03	-1.150331e+01	-3.686905e+01	-3.880033e+01	-4.522920e+01	2.306658e+01	-1.991020e+00	5.060916e+00	-4.260508e+01	5.733304e+00	-1.061763e+00	3.132503e+00	-3.773715e+01	-4.453923e+00	-1.932519e+01	-2.590576e+01	-4.037351e+00
1.089000e+03	1.849457e+03	1.356290e+01	-3.307451e+01	-3.596575e+01	-3.125395e+01	2.830110e+01	4.868956e+00	7.049845e+00	-4.448063e+01	1.140294e+01	5.411023e-01	4.162466e+00	-3.650542e+01	2.441777e+00	-1.203022e+01	-1.922520e+01	5.911880e+00
1.090000e+03	1.905888e+03	5.912605e+01	-1.655682e+01	-2.094424e+01	-4.792553e+00	3.827282e+01	1.957013e+01	1.437188e+01	-3.815703e+01	2.159637e+01	6.786170e+00	9.989681e+00	-2.772888e+01	1.453376e+01	2.892553e+00	-7.686378e+00	1.991438e+01
1.091000e+03	1.965826e+03	1.207200e+02	1.010459e+01	4.097730e+00	3.061484e+01	5.232313e+01	4.117929e+01	2.596897e+01	-2.482884e+01	3.492873e+01	1.692805e+01	1.996896e+01	-1.282860e+01	3.023624e+01	2.378363e+01	6.830081e+00	3.588169e+01
1.092000e+03	2.030268e+03	1.920983e+02	4.347777e+01	3.575022e+01	7.054175e+01	6.935832e+01	6.761518e+01	4.046791e+01	-6.434041e+00	4.990605e+01	2.979393e+01	3.274898e+01	5.958197e+00	4.760045e+01	4.816147e+01	2.237923e+01	5.168158e+01
1.093000e+03	2.098628e+03	2.659912e+02	7.984692e+01	6.989715e+01	1.103588e+02	8.794071e+01	9.585344e+01	5.641090e+01	1.464870e+01	6.519133e+01	4.392568e+01	4.647140e+01	2.597346e+01	6.461800e+01	7.310242e+01	3.725537e+01	6.552629e+01
1.094000e+03	2.167656e+03	3.347300e+02	1.155783e+02	1.022773e+02	1.457983e+02	1.064050e+02	1.223610e+02	7.239521e+01	3.585745e+01	7.971279e+01	5.774616e+01	5.910580e+01	4.453295e+01	7.945890e+01	9.566695e+01	5.013026e+01	7.611100e+01
1.095000e+03	2.231328e+03	3.910022e+02	1.473601e+02	1.290687e+02	1.734373e+02	1.230682e+02	1.437622e+02	8.716918e+01	5.468662e+01	9.266452e+01	6.979040e+01	6.889009e+01	5.927971e+01	9.066874e+01	1.133564e+02	6.007956e+01	8.260736e+01
1.096000e+03	2.281968e+03	4.289397e+02	1.724659e+02	1.474949e+02	1.911449e+02	1.365534e+02	1.576247e+02	9.974580e+01	6.896724e+01	1.034889e+02	7.900271e+01	7.478721e+01	6.849279e+01	9.735246e+01	1.245581e+02	6.658537e+01	8.466555e+01
1.097000e+03	2.312284e+03	4.453912e+02	1.891014e+02	1.563475e+02	1.984374e+02	1.461350e+02	1.631179e+02	1.095441e+02	7.719707e+01	1.118942e+02	8.501117e+01	7.680187e+01	7.133576e+01	9.932184e+01	1.288751e+02	6.956061e+01	8.249834e+01
1.098000e+03	2.317606e+03	4.408586e+02	1.967305e+02	1.562076e+02	1.965659e+02	1.519287e+02	1.612473e+02	1.164961e+02	7.883550e+01	1.178847e+02	8.822130e+01	7.598375e+01	6.798448e+01	9.712791e+01	1.272016e+02	6.936249e+01	7.698207e+01
1.099000e+03	2.297473e+03	4.194856e+02	1.961630e+02	1.491536e+02	1.881594e+02	1.547652e+02	1.544755e+02	1.210290e+02	7.441965e+01	1.217332e+02	8.959892e+01	7.402845e+01	5.955145e+01	9.189785e+01	1.214422e+02	6.671537e+01	6.962390e+01
1.100000e+03	2.256083e+03	3.878412e+02	1.892554e+02	1.379346e+02	1.764103e+02	1.557344e+02	1.457979e+02	1.238810e+02	6.539717e+01	1.238484e+02	9.015900e+01	7.256748e+01	4.777132e+01	8.497493e+01	1.139111e+02	6.249753e+01	6.228626e+01
1.101000e+03	2.201636e+03	3.528718e+02	1.782841e+02	1.249004e+02	1.640565e+02	1.555937e+02	1.376300e+02	1.258092e+02	5.370354e+01	1.245713e+02	9.037140e+01	7.243125e+01	3.452403e+01	7.748212e+01	1.066073e+02	5.744788e+01	5.670793e+01
1.102000e+03	2.145047e+03	3.199170e+02	1.652836e+02	1.111964e+02	1.526048e+02	1.543621e+02	1.310027e+02	1.273344e+02	4.125859e+01	1.240163e+02	8.981005e+01	7.325201e+01	2.138127e+01	7.001581e+01	1.006571e+02	5.194674e+01	5.401425e+01
1.103000e+03	2.098550e+03	2.917445e+02	1.517076e+02	9.670133e+01	1.422060e+02	1.513743e+02	1.254618e+02	1.286699e+02	2.961912e+01	1.220802e+02	8.730993e+01	7.366803e+01	9.386780e+00	6.265238e+01	9.616844e+01	4.603695e+01	5.445694e+01
1.104000e+03	2.074473e+03	2.690612e+02	1.386186e+02	8.084246e+01	1.322994e+02	1.458446e+02	1.197385e+02	1.298893e+02	1.994876e+01	1.186620e+02	8.165706e+01	7.211777e+01	-8.182005e-01	5.530609e+01	9.255693e+01	3.974205e+01	5.752312e+01
1.105000e+03	2.084116e+03	2.521475e+02	1.272873e+02	6.393550e+01	1.227244e+02	1.376946e+02	1.128660e+02	1.312462e+02	1.328127e+01	1.139985e+02	7.253417e+01	6.789955e+01	-8.600914e+00	4.827554e+01	8.917117e+01	3.355274e+01	6.235875e+01
1.106000e+03	2.136468e+03	2.425990e+02	1.197842e+02	4.831960e+01	1.146853e+02	1.282014e+02	1.051723e+02	1.334412e+02	1.086088e+01	1.089163e+02	6.124548e+01	6.198225e+01	-1.292672e+01	4.266751e+01	8.588861e+01	2.879580e+01	6.827801e+01
1.107000e+03	2.236645e+03	2.440206e+02	1.190581e+02	3.853104e+01	1.109410e+02	1.200416e+02	9.860524e+01	1.376210e+02	1.425839e+01	1.047932e+02	5.077321e+01	5.709997e+01	-1.224183e+01	4.038619e+01	8.335823e+01	2.758137e+01	7.508097e+01
1.108000e+03	2.384239e+03	2.610172e+02	1.282017e+02	4.014572e+01	1.149274e+02	1.165599e+02	9.615094e+01	1.450015e+02	2.505108e+01	1.031451e+02	4.498880e+01	5.695111e+01	-4.841956e+00	4.355080e+01	8.273748e+01	3.218776e+01	8.300637e+01
1.109000e+03	2.572097e+03	2.967421e+02	1.490465e+02	5.757195e+01	1.290627e+02	1.204667e+02	1.005433e+02	1.562031e+02	4.409156e+01	1.049508e+02	4.724012e+01	6.473306e+01	1.033320e+01	5.349223e+01	8.502846e+01	4.403145e+01	9.234783e+01
1.110000e+03	2.786110e+03	3.501284e+02	1.806676e+02	9.168118e+01	1.529840e+02	1.324959e+02	1.128272e+02	1.705755e+02	7.066108e+01	1.100041e+02	5.887370e+01	8.159186e+01	3.280862e+01	6.974519e+01	9.033631e+01	6.264427e+01	1.029508e+02
1.111000e+03	3.006423e+03	4.142840e+02	2.185869e+02	1.384016e+02	1.826251e+02	1.506460e+02	1.314538e+02	1.858647e+02	1.019548e+02	1.166318e+02	7.835240e+01	1.056796e+02	6.004975e+01	8.955211e+01	9.744026e+01	8.518093e+01	1.138811e+02
1.112000e+03	3.210026e+03	4.771434e+02	2.552641e+02	1.890981e+02	2.107697e+02	1.704331e+02	1.523839e+02	1.984804e+02	1.332743e+02	1.219918e+02	1.014241e+02	1.323120e+02	8.767383e+01	1.082442e+02	1.039430e+02	1.068225e+02	1.234749e+02
1.113000e+03	3.374274e+03	5.244725e+02	2.819187e+02	2.328169e+02	2.290680e+02	1.861572e+02	1.702445e+02	2.043769e+02	1.590135e+02	1.229097e+02	1.223586e+02	1.552700e+02	1.104575e+02	1.205011e+02	1.069971e+02	1.220666e+02	1.297845e+02
1.114000e+03	3.480538e+03	5.441861e+02	2.910932e+02	2.596263e+02	2.308043e+02	1.927302e+02	1.801059e+02	2.002649e+02	1.741495e+02	1.169502e+02	1.357994e+02	1.687907e+02	1.238255e+02	1.220721e+02	1.043259e+02	1.264742e+02	1.312280e+02
1.115000e+03	3.517166e+03	5.302498e+02	2.789691e+02	2.637546e+02	2.132983e+02	1.873452e+02	1.791638e+02	1.846971e+02	1.756903e+02	1.032870e+02	1.384983e+02	1.694738e+02	1.252548e+02	1.112812e+02	9.510554e+01	1.181889e+02	1.271437e+02
1.116000e+03	3.481095e+03	4.845593e+02	2.465201e+02	2.452990e+02	1.789380e+02	1.703323e+02	1.676505e+02	1.585920e+02	1.635185e+02	8.301077e+01	1.302572e+02	1.573615e+02	1.150404e+02	8.968766e+01	8.032889e+01	9.860546e+01	1.180011e+02
1.117000e+03	3.377877e+03	4.160810e+02	1.990886e+02	2.099023e+02	1.344352e+02	1.449011e+02	1.486448e+02	1.250002e+02	1.403300e+02	5.876814e+01	1.137602e+02	1.358045e+02	9.614094e+01	6.162130e+01	6.251175e+01	7.191996e+01	1.051918e+02
1.118000e+03	3.220226e+03	3.377355e+02	1.446404e+02	1.666630e+02	8.866321e+01	1.159470e+02	1.269264e+02	8.823101e+01	1.107390e+02	3.391075e+01	9.345485e+01	1.102450e+02	7.320758e+01	3.279616e+01	4.489007e+01	4.376959e+01	9.052757e+01
1.119000e+03	3.025571e+03	2.624008e+02	9.145216e+01	1.252108e+02	4.999167e+01	8.845720e+01	1.073906e+02	5.270317e+01	7.993817e+01	1.152256e+01	7.400605e+01	8.645449e+01	5.120473e+01	8.578937e+00	3.045593e+01	1.953195e+01	7.569303e+01
1.120000e+03	2.813203e+03	1.995969e+02	4.609178e+01	9.306515e+01	2.413264e+01	6.613971e+01	9.364698e+01	2.194196e+01	5.240792e+01	-6.308687e+00	5.893695e+01	6.890952e+01	3.412868e+01	-7.425256e+00	2.119848e+01	2.929983e+00	6.188290e+01
1.121000e+03	2.601612e+03	1.538936e+02	1.228749e+01	7.409822e+01	1.315672e+01	5.071172e+01	8.725419e+01	-1.982956e+00	3.106074e+01	-1.876713e+01	4.989069e+01	5.982363e+01	2.420849e+01	-1.401859e+01	1.777516e+01	-4.623040e+00	4.972779e+01
1.122000e+03	2.406469e+03	1.252099e+02	-9.164805e+00	6.836064e+01	1.577269e+01	4.195490e+01	8.772781e+01	-1.850127e+01	1.697813e+01	-2.613824e+01	4.662792e+01	5.902168e+01	2.173407e+01	-1.220878e+01	1.963436e+01	-3.866626e+00	3.945491e+01
1.123000e+03	2.239483e+03	1.104152e+02	-1.969543e+01	7.300343e+01	2.847964e+01	3.834178e+01	9.315058e+01	-2.818687e+01	9.668651e+00	-2.936079e+01	4.758187e+01	6.451099e+01	2.542316e+01	-4.416172e+00	2.544756e+01	3.026954e+00	3.113223e+01
1.124000e+03	2.108138e+03	1.053128e+02	-2.189058e+01	8.373869e+01	4.699329e+01	3.788192e+01	1.010505e+02	-3.222217e+01	7.636057e+00	-2.952460e+01	5.064411e+01	7.340733e+01	3.309627e+01	6.498414e+00	3.364334e+01	1.334488e+01	2.484501e+01
1.125000e+03	2.016134e+03	1.062115e+02	-1.847980e+01	9.626297e+01	6.743047e+01	3.885273e+01	1.092079e+02	-3.189304e+01	9.013399e+00	-2.749222e+01	5.386818e+01	8.285079e+01	4.239631e+01	1.802178e+01	4.286220e+01	2.456347e+01	2.073235e+01
1.126000e+03	1.964216e+03	1.106982e+02	-1.165758e+01	1.072447e+02	8.698930e+01	4.021307e+01	1.161698e+02	-2.824994e+01	1.206987e+01	-2.372725e+01	5.590127e+01	9.065371e+01	5.134447e+01	2.840768e+01	5.222855e+01	3.475644e+01	1.890865e+01
1.127000e+03	1.951077e+03	1.176566e+02	-2.824410e+00	1.147348e+02	1.041303e+02	4.166657e+01	1.214070e+02	-2.197439e+01	1.549310e+01	-1.831776e+01	5.610731e+01	9.558595e+01	5.862771e+01	3.673930e+01	6.142156e+01	4.270506e+01	1.935457e+01
1.128000e+03	1.974050e+03	1.268645e+02	7.337332e+00	1.180969e+02	1.184383e+02	4.347687e+01	1.251919e+02	-1.340824e+01	1.845598e+01	-1.111904e+01	5.446649e+01	9.735162e+01	6.362943e+01	4.277746e+01	7.059478e+01	4.784079e+01	2.186250e+01
1.129000e+03	2.029454e+03	1.385795e+02	1.864810e+01	1.177055e+02	1.303966e+02	4.620073e+01	1.283483e+02	-2.655705e+00	2.056187e+01	-1.914001e+00	5.139448e+01	9.640070e+01	6.630860e+01	4.677094e+01	8.023220e+01	5.016270e+01	2.608142e+01
1.130000e+03	2.112563e+03	1.534185e+02	3.129436e+01	1.146896e+02	1.412471e+02	5.049222e+01	1.320245e+02	1.033754e+01	2.179558e+01	9.498928e+00	4.761439e+01	9.373006e+01	6.707106e+01	4.935840e+01	9.102964e+01	5.021719e+01	3.165783e+01
1.131000e+03	2.217351e+03	1.726287e+02	4.591364e+01	1.109006e+02	1.530032e+02	5.705978e+01	1.375750e+02	2.578813e+01	2.257436e+01	2.333996e+01	4.415152e+01	9.077058e+01	6.674321e+01	5.160235e+01	1.038534e+02	4.915132e+01	3.843804e+01
1.132000e+03	2.336233e+03	1.986128e+02	6.389606e+01	1.091065e+02	1.685519e+02	6.676211e+01	1.465401e+02	4.415933e+01	2.390551e+01	3.999182e+01	4.243238e+01	8.936363e+01	6.666673e+01	5.510433e+01	1.197678e+02	4.878764e+01	4.668076e+01
1.133000e+03	2.460096e+03	2.354043e+02	8.774089e+01	1.132355e+02	1.917008e+02	8.075049e+01	1.606397e+02	6.626384e+01	2.756106e+01	6.018166e+01	4.439571e+01	9.175112e+01	6.883125e+01	6.209211e+01	1.400686e+02	5.163791e+01	5.722250e+01
1.134000e+03	2.578826e+03	2.887632e+02	1.212263e+02	1.284161e+02	2.270168e+02	1.005400e+02	1.816884e+02	9.330006e+01	3.612906e+01	8.509951e+01	5.249769e+01	1.004819e+02	7.590920e+01	7.536597e+01	1.662454e+02	6.077916e+01	7.153780e+01
1.135000e+03	2.682372e+03	3.656981e+02	1.692010e+02	1.606278e+02	2.793860e+02	1.279309e+02	2.114001e+02	1.267664e+02	5.283233e+01	1.163712e+02	6.953271e+01	1.181853e+02	9.108567e+01	9.804466e+01	1.998375e+02	7.955787e+01	9.165420e+01
1.136000e+03	2.762123e+03	4.734636e+02	2.369646e+02	2.159540e+02	3.533554e+02	1.647813e+02	2.511345e+02	1.682631e+02	8.110142e+01	1.558656e+02	9.827429e+01	1.472454e+02	1.176706e+02	1.331375e+02	2.422157e+02	1.111500e+02	1.199188e+02
1.137000e+03	2.812209e+03	6.182963e+02	3.293782e+02	2.996112e+02	4.524220e+02	2.127028e+02	3.016927e+02	2.192449e+02	1.239949e+02	2.053854e+02	1.410218e+02	1.894719e+02	1.585809e+02	1.830432e+02	2.943721e+02	1.580606e+02	1.586561e+02
1.138000e+03	2.830285e+03	8.042096e+02	4.499278e+02	4.149991e+02	5.784395e+02	2.727642e+02	3.632323e+02	2.807876e+02	1.836108e+02	2.663184e+02	1.991682e+02	2.458547e+02	2.158232e+02	2.490975e+02	3.567833e+02	2.216666e+02	2.097769e+02
1.139000e+03	2.817589e+03	1.032031e+03	5.999051e+02	5.629443e+02	7.312056e+02	3.452418e+02	4.352794e+02	3.533740e+02	2.606033e+02	3.393022e+02	2.728653e+02	3.164109e+02	2.900725e+02	3.312462e+02	4.293367e+02	3.018787e+02	2.743788e+02
1.140000e+03	2.778380e+03	1.298644e+03	7.777343e+02	7.411530e+02	9.081561e+02	4.293790e+02	5.167123e+02	4.366332e+02	3.538374e+02	4.238961e+02	3.607891e+02	4.000514e+02	3.803584e+02	4.278482e+02	5.112265e+02	3.969384e+02	3.523437e+02
1.141000e+03	2.719077e+03	1.596282e+03	9.783749e+02	9.437809e+02	1.104023e+03	5.230886e+02	6.055799e+02	5.289589e+02	4.601504e+02	5.182227e+02	4.599575e+02	4.943661e+02	4.838191e+02	5.355548e+02	6.007115e+02	5.033194e+02	4.419208e+02
1.142000e+03	2.647474e+03	1.911798e+03	1.192787e+03	1.161075e+03	1.310396e+03	6.225887e+02	6.987147e+02	6.270158e+02	5.742007e+02	6.185834e+02	5.655719e+02	5.953063e+02	5.954999e+02	6.492294e+02	6.947072e+02	6.156967e+02	5.393305e+02
1.143000e+03	2.572123e+03	2.226191e+03	1.407638e+03	1.379226e+03	1.515348e+03	7.220917e+02	7.912745e+02	7.252990e+02	6.884715e+02	7.191631e+02	6.709487e+02	6.968909e+02	7.082757e+02	7.619458e+02	7.883438e+02	7.270122e+02	6.385163e+02
1.144000e+03	2.501739e+03	2.514934e+03	1.605650e+03	1.580792e+03	1.703492e+03	8.137883e+02	8.764983e+02	8.160432e+02	7.935979e+02	8.120488e+02	7.677105e+02	7.911888e+02	8.130807e+02	8.652061e+02	8.747569e+02	8.287431e+02	7.312580e+02
1.145000e+03	2.444342e+03	2.749800e+03	1.767029e+03	1.746093e+03	1.856939e+03	8.883942e+02	9.459951e+02	8.897837e+02	8.792105e+02	8.878157e+02	8.464367e+02	8.688509e+02	8.996562e+02	9.495567e+02	9.454146e+02	9.115336e+02	8.078612e+02
1.146000e+03	2.406032e+03	2.902503e+03	1.872168e+03	1.855786e+03	1.957443e+03	9.363914e+02	9.907511e+02	9.366989e+02	9.353636e+02	9.368019e+02	8.978790e+02	9.203193e+02	9.579072e+02	1.005712e+03	9.911597e+02	9.662927e+02	8.585030e+02
1.147000e+03	2.389636e+03	2.949790e+03	1.905297e+03	1.894320e+03	1.989562e+03	9.498223e+02	1.002773e+03	9.485494e+02	9.543656e+02	9.509307e+02	9.146116e+02	9.375731e+02	9.797090e+02	1.026104e+03	1.003879e+03	9.856925e+02	8.750649e+02
1.148000e+03	2.393777e+03	2.878795e+03	1.858185e+03	1.853458e+03	1.944165e+03	9.241976e+02	9.769812e+02	9.207083e+02	9.325512e+02	9.256336e+02	8.927321e+02	9.159812e+02	9.607266e+02	1.006515e+03	9.784153e+02	9.657584e+02	8.530112e+02
1.149000e+03	2.412942e+03	2.690960e+03	1.732652e+03	1.734713e+03	1.821170e+03	8.599001e+02	9.127667e+02	8.536110e+02	8.714004e+02	8.612526e+02	8.330604e+02	8.556703e+02	9.016528e+02	9.473081e+02	9.141174e+02	9.070609e+02	7.927184e+02
1.150000e+03	2.438852e+03	2.402981e+03	1.540892e+03	1.549721e+03	1.630484e+03	7.625433e+02	8.146405e+02	7.530605e+02	7.775255e+02	7.633694e+02	7.413552e+02	7.618857e+02	8.083658e+02	8.537427e+02	8.154653e+02	8.150253e+02	6.997456e+02
1.151000e+03	2.462862e+03	2.044161e+03	1.303273e+03	1.318215e+03	1.390575e+03	6.420670e+02	6.916733e+02	6.292029e+02	6.614206e+02	6.418556e+02	6.273657e+02	6.441407e+02	6.908489e+02	7.351737e+02	6.914610e+02	6.991190e+02	5.838634e+02
1.152000e+03	2.478648e+03	1.650816e+03	1.044225e+03	1.064135e+03	1.125008e+03	5.108103e+02	5.558382e+02	4.944713e+02	5.353279e+02	5.089017e+02	5.029607e+02	5.143750e+02	5.611729e+02	6.032946e+02	5.539292e+02	5.710817e+02	4.571056e+02
1.153000e+03	2.484092e+03	1.259452e+03	7.875615e+02	8.110998e+02	8.579801e+02	3.811608e+02	4.197575e+02	3.611667e+02	4.109042e+02	3.766624e+02	3.799100e+02	3.846978e+02	4.311874e+02	4.699612e+02	4.152592e+02	4.427222e+02	3.314609e+02
1.154000e+03	2.481532e+03	9.007625e+02	5.526317e+02	5.786060e+02	6.102311e+02	2.634841e+02	2.945229e+02	2.394171e+02	2.973944e+02	2.552427e+02	2.679773e+02	2.653837e+02	3.106259e+02	3.452515e+02	2.862821e+02	3.239490e+02	2.169042e+02
1.155000e+03	2.476153e+03	5.959202e+02	3.522633e+02	3.798727e+02	3.963957e+02	1.648418e+02	1.881596e+02	1.360168e+02	2.007377e+02	1.515313e+02	1.737852e+02	1.636184e+02	2.060845e+02	2.362582e+02	1.748500e+02	2.215447e+02	1.202529e+02
1.156000e+03	2.473183e+03	3.556190e+02	1.926018e+02	2.215044e+02	2.242036e+02	8.864881e+01	1.050005e+02	5.424725e+01	1.236193e+02	6.898825e+01	1.005652e+02	8.314277e+01	1.209367e+02	1.467757e+02	8.534092e+01	1.388612e+02	4.495054e+01
1.157000e+03	2.475171e+03	1.813192e+02	7.429472e+01	1.045002e+02	9.523550e+01	3.509198e+01	4.590562e+01	-5.568023e+00	6.615137e+01	8.148860e+00	4.859458e+01	2.463189e+01	5.590415e+01	7.770962e+01	1.896348e+01	7.627051e+01	-8.454722e+00
1.158000e+03	2.480686e+03	6.765469e+01	-5.799080e+00	2.586004e+01	6.545826e+00	1.967092e+00	9.038695e+00	-4.517893e+01	2.675743e+01	-3.255151e+01	1.598393e+01	-1.352333e+01	9.876019e+00	2.786316e+01	-2.547902e+01	3.202348e+01	-4.152345e+01
1.159000e+03	2.485095e+03	5.024926e+00	-5.303861e+01	-1.984574e+01	-4.754999e+01	-1.439159e+01	-9.145332e+00	-6.754315e+01	2.934204e+00	-5.596861e+01	-4.903766e-01	-3.435116e+01	-1.935373e+01	-5.232432e+00	-5.072166e+01	3.170633e+00	-5.716011e+01
1.160000e+03	2.483056e+03	-1.822665e+01	-7.387002e+01	-3.926637e+01	-7.398351e+01	-1.830074e+01	-1.298275e+01	-7.616754e+01	-8.241532e+00	-6.562530e+01	-4.685698e+00	-4.156183e+01	-3.457721e+01	-2.464328e+01	-6.030685e+01	-1.367722e+01	-5.903594e+01
1.161000e+03	2.471503e+03	-1.422823e+01	-7.512042e+01	-3.946131e+01	-7.989960e+01	-1.412571e+01	-6.912736e+00	-7.468585e+01	-9.831930e+00	-6.528646e+01	-5.826900e-01	-3.902170e+01	-3.887342e+01	-3.356748e+01	-5.807331e+01	-2.182628e+01	-5.120336e+01
1.162000e+03	2.451628e+03	5.491933e+00	-6.355075e+01	-2.737706e+01	-7.203024e+01	-5.891891e+00	4.943648e+00	-6.661126e+01	-4.881139e+00	-5.866879e+01	8.052734e+00	-3.042978e+01	-3.542313e+01	-3.504036e+01	-4.783333e+01	-2.419627e+01	-3.781678e+01
1.163000e+03	2.428954e+03	3.074758e+01	-4.550097e+01	-9.466200e+00	-5.633276e+01	2.934490e+00	1.899409e+01	-5.517872e+01	3.713172e+00	-4.921444e+01	1.788574e+01	-1.913384e+01	-2.734420e+01	-3.174641e+01	-3.315514e+01	-2.317628e+01	-2.286279e+01
1.164000e+03	2.411491e+03	5.328445e+01	-2.652579e+01	8.667215e+00	-3.774801e+01	9.571781e+00	3.228526e+01	-4.320627e+01	1.335472e+01	-3.988173e+01	2.617000e+01	-8.001438e+00	-1.749438e+01	-2.589051e+01	-1.716872e+01	-2.057723e+01	-9.840141e+00
1.165000e+03	2.406921e+03	6.732794e+01	-1.098985e+01	2.265847e+01	-1.998539e+01	1.203736e+01	4.261951e+01	-3.293509e+01	2.194096e+01	-3.293266e+01	3.090166e+01	7.260934e-01	-8.234485e+00	-1.910980e+01	-2.351064e+00	-1.763152e+01	-1.388453e+00
1.166000e+03	2.420051e+03	7.007945e+01	-1.657433e+00	2.979694e+01	-5.320063e+00	9.300333e+00	4.872150e+01	-2.584847e+01	2.806580e+01	-2.972540e+01	3.098886e+01	5.619130e+00	-1.183185e+00	-1.243076e+01	9.695217e+00	-1.501169e+01	1.070923e+00
1.167000e+03	2.451517e+03	6.200373e+01	6.179620e-01	2.935750e+01	5.527111e+00	1.445538e+00	5.039925e+01	-2.251812e+01	3.117284e+01	-3.055705e+01	2.639449e+01	6.234427e+00	2.971605e+00	-6.287791e+00	1.839619e+01	-1.286463e+01	-2.434521e+00
1.168000e+03	2.498030e+03	4.664211e+01	-3.057357e+00	2.266536e+01	1.330023e+01	-1.026021e+01	4.856456e+01	-2.256420e+01	3.157946e+01	-3.463875e+01	1.815432e+01	3.170846e+00	4.519442e+00	-6.202031e-01	2.418571e+01	-1.088011e+01	-1.045955e+01
1.169000e+03	2.553780e+03	2.971646e+01	-9.985763e+00	1.271647e+01	1.979720e+01	-2.353824e+01	4.497709e+01	-2.481538e+01	3.030381e+01	-4.029114e+01	8.167989e+00	-2.101796e+00	4.556655e+00	4.946593e+00	2.822410e+01	-8.420533e+00	-2.052028e+01
1.170000e+03	2.612259e+03	1.751130e+01	-1.670933e+01	3.304024e+00	2.713018e+01	-3.557757e+01	4.167981e+01	-2.769584e+01	2.868368e+01	-4.539422e+01	-1.268287e+00	-7.672286e+00	4.580224e+00	1.085311e+01	3.186332e+01	-4.725802e+00	-2.979327e+01
1.171000e+03	2.667735e+03	1.488103e+01	-2.014415e+01	-2.173959e+00	3.682163e+01	-4.375054e+01	4.026347e+01	-2.976039e+01	2.786887e+01	-4.801395e+01	-8.093251e+00	-1.178121e+01	5.926891e+00	1.734065e+01	3.600050e+01	8.293482e-01	-3.595950e+01
1.172000e+03	2.715938e+03	2.355177e+01	-1.864884e+01	-1.833454e+00	4.905751e+01	-4.633706e+01	4.124448e+01	-3.019373e+01	2.835903e+01	-4.700868e+01	-1.106577e+01	-1.337054e+01	9.239514e+00	2.424994e+01	4.057359e+01	8.492816e+00	-3.790799e+01
1.173000e+03	2.753925e+03	4.146367e+01	-1.257205e+01	4.121188e+00	6.246133e+01	-4.296456e+01	4.386584e+01	-2.905308e+01	2.979234e+01	-4.236527e+01	-1.006034e+01	-1.235310e+01	1.418824e+01	3.097642e+01	4.446616e+01	1.800444e+01	-3.601088e+01
1.174000e+03	2.779465e+03	6.360708e+01	-3.953547e+00	1.369236e+01	7.461373e+01	-3.455207e+01	4.649017e+01	-2.710619e+01	3.112793e+01	-3.508258e+01	-5.918676e+00	-9.454466e+00	1.961721e+01	3.664612e+01	4.596097e+01	2.866207e+01	-3.181671e+01
1.175000e+03	2.790529e+03	8.421535e+01	4.615602e+00	2.423620e+01	8.324313e+01	-2.275254e+01	4.749271e+01	-2.528536e+01	3.121367e+01	-2.659955e+01	1.131188e-01	-5.659676e+00	2.412868e+01	4.050188e+01	4.364730e+01	3.960483e+01	-2.723992e+01
1.176000e+03	2.785417e+03	9.954831e+01	1.157704e+01	3.405099e+01	8.767778e+01	-9.116521e+00	4.630562e+01	-2.396492e+01	2.955030e+01	-1.797522e+01	7.140020e+00	-1.486363e+00	2.691604e+01	4.239090e+01	3.744877e+01	5.023740e+01	-2.355073e+01
1.177000e+03	2.763739e+03	1.101571e+02	1.778443e+01	4.375225e+01	8.995268e+01	5.668767e+00	4.415160e+01	-2.237699e+01	2.694307e+01	-9.161131e+00	1.524427e+01	3.595206e+00	2.851258e+01	4.316996e+01	2.932379e+01	6.063646e+01	-2.057787e+01
1.178000e+03	2.727973e+03	1.216635e+02	2.705836e+01	5.682047e+01	9.503165e+01	2.214788e+01	4.410838e+01	-1.844420e+01	2.574149e+01	1.313854e+00	2.570852e+01	1.132231e+01	3.111620e+01	4.484066e+01	2.327668e+01	7.176163e+01	-1.646465e+01
1.179000e+03	2.684851e+03	1.436591e+02	4.560571e+01	7.902606e+01	1.099249e+02	4.193546e+01	5.042058e+01	-9.143171e+00	2.951228e+01	1.608995e+01	4.073322e+01	2.428186e+01	3.829687e+01	5.030601e+01	2.457760e+01	8.535307e+01	-8.098839e+00
1.180000e+03	2.645738e+03	1.870551e+02	8.042957e+01	1.168751e+02	1.419077e+02	6.710720e+01	6.728671e+01	8.698025e+00	4.220430e+01	3.822144e+01	6.275007e+01	4.514875e+01	5.412906e+01	6.276841e+01	3.840371e+01	1.035091e+02	7.926567e+00
1.181000e+03	2.625387e+03	2.607452e+02	1.372188e+02	1.755733e+02	1.963747e+02	9.937883e+01	9.754396e+01	3.742192e+01	6.704909e+01	7.016570e+01	9.357133e+01	7.578220e+01	8.200614e+01	8.490870e+01	6.833382e+01	1.280455e+02	3.414994e+01
1.182000e+03	2.639112e+03	3.685972e+02	2.183565e+02	2.571347e+02	2.749671e+02	1.393433e+02	1.416761e+02	7.768392e+01	1.055221e+02	1.128306e+02	1.336407e+02	1.164686e+02	1.234988e+02	1.180523e+02	1.151666e+02	1.598051e+02	7.124677e+01
1.183000e+03	2.699032e+03	5.075885e+02	3.216195e+02	3.591720e+02	3.744973e+02	1.859783e+02	1.974144e+02	1.279626e+02	1.566568e+02	1.649595e+02	1.815869e+02	1.655222e+02	1.775907e+02	1.615363e+02	1.763991e+02	1.981033e+02	1.174921e+02
1.184000e+03	2.810489e+03	6.675464e+02	4.399380e+02	4.746870e+02	4.869660e+02	2.365488e+02	2.599951e+02	1.845835e+02	2.168967e+02	2.230391e+02	2.341892e+02	2.193402e+02	2.405046e+02	2.124614e+02	2.464891e+02	2.404829e+02	1.688240e+02
1.185000e+03	2.969731e+03	8.326067e+02	5.623536e+02	5.929668e+02	6.007386e+02	2.869579e+02	3.229784e+02	2.422929e+02	2.805498e+02	2.818032e+02	2.867879e+02	2.729140e+02	3.061870e+02	2.659599e+02	3.178277e+02	2.829180e+02	2.195121e+02
1.186000e+03	3.163673e+03	9.842180e+02	6.760772e+02	7.014906e+02	7.027440e+02	3.325302e+02	3.794605e+02	2.953126e+02	3.407930e+02	3.352854e+02	3.341134e+02	3.207335e+02	3.673866e+02	3.160273e+02	3.822198e+02	3.205324e+02	2.633180e+02
1.187000e+03	3.372018e+03	1.105216e+03	7.692988e+02	7.885635e+02	7.813434e+02	3.691229e+02	4.234709e+02	3.386858e+02	3.910683e+02	3.782339e+02	3.714259e+02	3.579573e+02	4.171481e+02	3.568304e+02	4.325860e+02	3.487665e+02	2.949271e+02
1.188000e+03	3.571436e+03	1.184134e+03	8.341369e+02	8.461547e+02	8.292687e+02	3.943232e+02	4.513067e+02	3.696013e+02	4.265945e+02	4.075479e+02	3.957426e+02	3.816246e+02	4.504233e+02	3.842229e+02	4.645356e+02	3.647427e+02	3.113274e+02
1.189000e+03	3.740961e+03	1.218583e+03	8.689052e+02	8.721985e+02	8.458164e+02	4.083662e+02	4.624828e+02	3.882886e+02	4.456163e+02	4.232964e+02	4.068076e+02	3.915857e+02	4.654021e+02	3.970338e+02	4.774169e+02	3.684087e+02	3.127437e+02
1.190000e+03	3.867285e+03	1.216464e+03	8.788662e+02	8.715453e+02	8.374608e+02	4.143756e+02	4.599584e+02	3.981053e+02	4.499795e+02	4.288957e+02	4.074214e+02	3.907862e+02	4.641346e+02	3.976419e+02	4.744821e+02	3.629869e+02	3.027657e+02
1.191000e+03	3.948351e+03	1.194200e+03	8.749514e+02	8.549812e+02	8.163678e+02	4.176679e+02	4.494136e+02	4.046220e+02	4.447357e+02	4.302255e+02	4.028606e+02	3.846516e+02	4.521300e+02	3.914935e+02	4.619745e+02	3.543999e+02	2.874975e+02
1.192000e+03	3.993835e+03	1.172074e+03	8.705504e+02	8.362983e+02	7.969467e+02	4.241719e+02	4.376245e+02	4.138479e+02	4.367453e+02	4.338150e+02	3.994070e+02	3.795939e+02	4.368989e+02	3.855565e+02	4.472705e+02	3.496808e+02	2.738625e+02
1.193000e+03	4.021820e+03	1.167889e+03	8.772139e+02	8.281376e+02	7.913618e+02	4.383921e+02	4.303569e+02	4.301006e+02	4.326100e+02	4.446132e+02	4.023615e+02	3.810210e+02	4.257815e+02	3.861229e+02	4.365806e+02	3.547838e+02	2.675315e+02
1.194000e+03	4.052219e+03	1.191021e+03	9.006604e+02	8.379178e+02	8.054838e+02	4.616158e+02	4.304766e+02	4.542537e+02	4.365660e+02	4.641022e+02	4.142009e+02	3.915071e+02	4.237201e+02	3.966867e+02	4.329653e+02	3.725192e+02	2.711467e+02
1.195000e+03	4.098877e+03	1.239011e+03	9.385336e+02	8.653051e+02	8.367756e+02	4.910789e+02	4.369974e+02	4.830504e+02	4.490614e+02	4.894781e+02	4.335738e+02	4.098176e+02	4.317322e+02	4.166729e+02	4.353987e+02	4.013764e+02	2.834683e+02
1.196000e+03	4.163112e+03	1.298077e+03	9.808311e+02	9.022202e+02	8.749859e+02	5.205092e+02	4.454868e+02	5.098317e+02	4.665481e+02	5.142865e+02	4.555805e+02	4.312169e+02	4.466385e+02	4.415168e+02	4.392659e+02	4.357186e+02	2.997744e+02
1.197000e+03	4.231368e+03	1.347485e+03	1.012973e+03	9.354735e+02	9.054866e+02	5.419552e+02	4.497278e+02	5.265096e+02	4.826050e+02	5.303687e+02	4.733075e+02	4.490072e+02	4.621631e+02	4.640980e+02	4.381431e+02	4.673418e+02	3.133974e+02
1.198000e+03	4.278316e+03	1.366289e+03	1.020494e+03	9.511324e+02	9.140817e+02	5.482979e+02	4.440293e+02	5.261264e+02	4.900222e+02	5.304704e+02	4.800991e+02	4.567629e+02	4.710290e+02	4.770186e+02	4.262034e+02	4.878767e+02	3.178681e+02
1.199000e+03	4.274733e+03	1.340083e+03	9.937386e+02	9.390778e+02	8.915726e+02	5.355555e+02	4.253161e+02	5.051091e+02	4.831363e+02	5.105995e+02	4.717505e+02	4.504468e+02	4.673220e+02	4.749166e+02	4.003614e+02	4.912097e+02	3.089355e+02
1.200000e+03	4.197515e+03	1.265476e+03	9.309604e+02	8.961765e+02	8.365287e+02	5.041627e+02	3.942404e+02	4.644438e+02	4.596349e+02	4.713216e+02	4.478421e+02	4.296591e+02	4.483287e+02	4.560259e+02	3.614002e+02	4.751271e+02	2.858121e+02
1.201000e+03	4.038199e+03	1.150969e+03	8.388700e+02	8.270730e+02	7.554718e+02	4.588133e+02	3.549717e+02	4.094235e+02	4.212642e+02	4.176016e+02	4.117843e+02	3.976259e+02	4.152829e+02	4.225250e+02	3.137605e+02	4.417099e+02	2.513109e+02
1.202000e+03	3.806851e+03	1.014236e+03	7.306298e+02	7.425094e+02	6.606750e+02	4.070009e+02	3.138445e+02	3.481493e+02	3.732820e+02	3.573438e+02	3.696418e+02	3.600287e+02	3.728625e+02	3.796823e+02	2.641874e+02	3.964862e+02	2.109461e+02
1.203000e+03	3.529935e+03	8.770130e+02	6.221407e+02	6.559450e+02	5.665610e+02	3.568437e+02	2.774312e+02	2.893755e+02	3.229167e+02	2.992207e+02	3.282418e+02	3.231800e+02	3.276992e+02	3.342107e+02	2.198076e+02	3.467521e+02	1.713906e+02
1.204000e+03	3.243076e+03	7.593678e+02	5.279203e+02	5.797158e+02	4.859773e+02	3.149590e+02	2.507298e+02	2.404207e+02	2.773835e+02	2.505343e+02	2.932604e+02	2.922171e+02	2.864529e+02	2.924389e+02	1.863041e+02	2.996723e+02	1.388126e+02
1.205000e+03	2.981423e+03	6.750453e+02	4.577984e+02	5.219599e+02	4.274153e+02	2.850247e+02	2.360051e+02	2.057193e+02	2.420790e+02	2.157178e+02	2.678898e+02	2.698826e+02	2.540692e+02	2.588547e+02	1.666968e+02	2.607183e+02	1.175432e+02
1.206000e+03	2.770927e+03	6.289708e+02	4.152186e+02	4.851068e+02	3.937229e+02	2.673416e+02	2.325145e+02	1.862833e+02	2.194476e+02	1.957700e+02	2.523994e+02	2.561741e+02	2.327082e+02	2.353544e+02	1.609410e+02	2.327828e+02	1.093395e+02
1.207000e+03	2.623170e+03	6.172306e+02	3.973446e+02	4.661307e+02	3.823283e+02	2.593481e+02	2.370457e+02	1.800280e+02	2.087551e+02	1.885889e+02	2.445638e+02	2.488178e+02	2.215690e+02	2.212616e+02	1.662843e+02	2.160460e+02	1.133021e+02
1.208000e+03	2.534858e+03	6.291582e+02	3.966657e+02	4.582222e+02	3.866130e+02	2.567732e+02	2.449818e+02	1.827181e+02	2.067166e+02	1.899486e+02	2.406803e+02	2.442790e+02	2.175449e+02	2.139577e+02	1.781549e+02	2.084613e+02	1.263527e+02
1.209000e+03	2.491463e+03	6.507105e+02	4.034788e+02	4.531962e+02	3.979178e+02	2.550085e+02	2.515360e+02	1.892037e+02	2.087012e+02	1.947768e+02	2.367877e+02	2.389259e+02	2.164117e+02	2.098538e+02	1.913021e+02	2.066198e+02	1.440898e+02
1.210000e+03	2.473293e+03	6.681416e+02	4.085183e+02	4.438758e+02	4.076584e+02	2.503075e+02	2.528371e+02	1.946426e+02	2.101145e+02	1.984026e+02	2.297343e+02	2.300047e+02	2.141444e+02	2.054122e+02	2.009302e+02	2.067328e+02	1.618010e+02
1.211000e+03	2.461828e+03	6.710564e+02	4.050819e+02	4.258318e+02	4.091115e+02	2.405484e+02	2.466467e+02	1.954617e+02	2.075668e+02	1.975134e+02	2.178565e+02	2.162155e+02	2.079773e+02	1.979803e+02	2.036099e+02	2.055064e+02	1.754092e+02
1.212000e+03	2.444439e+03	6.542068e+02	3.902064e+02	3.981375e+02	3.985553e+02	2.254578e+02	2.326205e+02	1.899000e+02	1.995510e+02	1.906534e+02	2.011809e+02	1.978339e+02	1.969573e+02	1.862831e+02	1.978146e+02	2.007454e+02	1.821612e+02
1.213000e+03	2.416371e+03	6.177994e+02	3.647406e+02	3.631100e+02	3.756096e+02	2.063425e+02	2.121382e+02	1.780761e+02	1.865277e+02	1.782102e+02	1.811859e+02	1.764470e+02	1.819233e+02	1.705198e+02	1.840049e+02	1.916093e+02	1.809407e+02
1.214000e+03	2.379910e+03	5.664988e+02	3.324609e+02	3.252755e+02	3.428043e+02	1.854879e+02	1.878144e+02	1.616273e+02	1.704974e+02	1.619604e+02	1.602546e+02	1.544420e+02	1.650184e+02	1.521022e+02	1.642863e+02	1.785224e+02	1.721925e+02
1.215000e+03	2.341558e+03	5.076174e+02	2.986145e+02	2.899473e+02	3.045766e+02	1.654270e+02	1.628360e+02	1.430632e+02	1.542623e+02	1.443485e+02	1.409890e+02	1.343948e+02	1.489543e+02	1.331479e+02	1.417572e+02	1.628240e+02	1.575444e+02
1.216000e+03	2.308629e+03	4.490954e+02	2.683663e+02	2.618308e+02	2.660173e+02	1.482772e+02	1.402782e+02	1.250313e+02	1.406286e+02	1.277334e+02	1.255570e+02	1.184934e+02	1.362684e+02	1.158842e+02	1.197344e+02	1.462881e+02	1.392784e+02
1.217000e+03	2.286683e+03	3.977935e+02	2.455745e+02	2.439886e+02	2.317060e+02	1.352835e+02	1.225277e+02	1.096867e+02	1.317584e+02	1.138111e+02	1.152144e+02	1.080977e+02	1.287674e+02	1.021233e+02	1.010555e+02	1.306565e+02	1.198059e+02
1.218000e+03	2.278663e+03	3.584116e+02	2.321400e+02	2.373552e+02	2.049018e+02	1.266389e+02	1.109145e+02	9.830237e+01	1.287951e+02	1.033392e+02	1.100897e+02	1.035140e+02	1.272578e+02	9.293180e+01	8.761533e+01	1.172935e+02	1.012608e+02
1.219000e+03	2.285805e+03	3.331068e+02	2.279619e+02	2.408246e+02	1.872117e+02	1.215752e+02	1.056108e+02	9.116434e+01	1.317854e+02	9.617018e+01	1.092584e+02	1.040231e+02	1.315578e+02	8.854666e+01	8.020637e+01	1.070136e+02	8.525537e+01
1.220000e+03	2.309548e+03	3.216877e+02	2.313442e+02	2.517836e+02	1.786989e+02	1.186599e+02	1.057969e+02	8.770951e+01	1.398360e+02	9.150120e+01	1.110641e+02	1.081451e+02	1.407107e+02	8.850830e+01	7.863888e+01	1.000694e+02	7.278633e+01
1.221000e+03	2.353245e+03	3.221428e+02	2.396066e+02	2.668578e+02	1.782596e+02	1.161928e+02	1.100230e+02	8.680295e+01	1.513997e+02	8.819948e+01	1.135790e+02	1.140506e+02	1.532701e+02	9.191084e+01	8.203033e+01	9.623954e+01	6.424262e+01
1.222000e+03	2.422561e+03	3.312384e+02	2.496599e+02	2.826050e+02	1.840434e+02	1.125858e+02	1.166262e+02	8.703625e+01	1.645770e+02	8.507509e+01	1.150613e+02	1.199783e+02	1.675354e+02	9.763788e+01	8.911619e+01	9.493809e+01	5.945902e+01
1.223000e+03	2.524015e+03	3.449665e+02	2.583888e+02	2.959437e+02	1.937182e+02	1.066219e+02	1.240443e+02	8.695386e+01	1.773537e+02	8.102715e+01	1.142676e+02	1.245065e+02	1.816686e+02	1.044731e+02	9.845009e+01	9.527940e+01	5.777403e+01
1.224000e+03	2.662018e+03	3.587409e+02	2.628089e+02	3.042344e+02	2.044946e+02	9.753411e+01	1.309103e+02	8.516442e+01	1.877445e+02	7.505615e+01	1.105324e+02	1.265889e+02	1.936957e+02	1.110454e+02	1.084327e+02	9.607347e+01	5.807222e+01
1.225000e+03	2.835583e+03	3.673847e+02	2.600632e+02	3.050844e+02	2.129720e+02	8.489919e+01	1.359192e+02	8.034884e+01	1.938666e+02	6.618824e+01	1.036073e+02	1.253705e+02	2.014721e+02	1.156657e+02	1.172084e+02	9.577540e+01	5.881743e+01
1.226000e+03	3.036345e+03	3.650927e+02	2.473880e+02	2.960756e+02	2.150080e+02	6.841217e+01	1.375853e+02	7.122112e+01	1.939936e+02	5.338575e+01	9.335529e+01	1.199110e+02	2.027168e+02	1.161935e+02	1.225587e+02	9.246139e+01	5.810836e+01
1.227000e+03	3.249233e+03	3.456380e+02	2.221856e+02	2.746660e+02	2.058772e+02	4.765647e+01	1.340882e+02	5.652409e+01	1.866495e+02	3.552721e+01	7.946104e+01	1.090086e+02	1.952030e+02	1.101067e+02	1.219585e+02	8.393127e+01	5.380966e+01
1.228000e+03	3.456131e+03	3.030775e+02	1.823174e+02	2.384669e+02	1.809374e+02	2.201418e+01	1.234099e+02	3.514336e+01	1.707777e+02	1.153066e+01	6.133902e+01	9.129890e+01	1.771274e+02	9.489454e+01	1.129256e+02	6.802482e+01	4.381835e+01
1.229000e+03	3.641457e+03	2.330616e+02	1.266604e+02	1.859623e+02	1.368362e+02	-9.166405e+00	1.038486e+02	6.390614e+00	1.459896e+02	-1.933836e+01	3.835583e+01	6.570022e+01	1.476074e+02	6.876992e+01	9.367554e+01	4.317411e+01	2.650036e+01
1.230000e+03	3.797457e+03	1.345870e+02	5.586790e+01	1.175365e+02	7.302495e+01	-4.611755e+01	7.481962e+01	-2.956380e+01	1.128581e+02	-5.699902e+01	1.035338e+01	3.211354e+01	1.071850e+02	3.153183e+01	6.393682e+01	9.101859e+00	1.264989e+00
1.231000e+03	3.926817e+03	1.172306e+01	-2.686200e+01	3.648418e+01	-6.911829e+00	-8.802026e+01	3.766895e+01	-7.122322e+01	7.317346e+01	-1.000437e+02	-2.169792e+01	-7.867932e+00	5.818467e+01	-1.472258e+01	2.564399e+01	-3.254227e+01	-3.084926e+01
1.232000e+03	4.041294e+03	-1.253490e+02	-1.153181e+02	-5.042923e+01	-9.470562e+01	-1.324273e+02	-3.862262e+00	-1.154533e+02	3.005447e+01	-1.453799e+02	-5.519650e+01	-5.055574e+01	4.770182e+00	-6.535774e+01	-1.681644e+01	-7.787645e+01	-6.678320e+01
1.233000e+03	4.156816e+03	-2.606161e+02	-2.004308e+02	-1.332375e+02	-1.780790e+02	-1.750247e+02	-4.381889e+01	-1.575270e+02	-1.219867e+01	-1.882383e+02	-8.583469e+01	-9.032600e+01	-4.739978e+01	-1.136358e+02	-5.703394e+01	-1.210340e+02	-1.014800e+02
1.234000e+03	4.287243e+03	-3.741450e+02	-2.712498e+02	-2.000328e+02	-2.427163e+02	-2.099473e+02	-7.494523e+01	-1.916420e+02	-4.857137e+01	-2.226830e+02	-1.080984e+02	-1.204192e+02	-9.193154e+01	-1.518127e+02	-8.768228e+01	-1.550254e+02	-1.284638e+02
1.235000e+03	4.439477e+03	-4.454528e+02	-3.166937e+02	-2.390536e+02	-2.751330e+02	-2.306902e+02	-9.014808e+01	-2.118763e+02	-7.409634e+01	-2.426003e+02	-1.162831e+02	-1.342324e+02	-1.227677e+02	-1.726487e+02	-1.020594e+02	-1.730683e+02	-1.409611e+02
1.236000e+03	4.611818e+03	-4.576758e+02	-3.277490e+02	-2.411449e+02	-2.657074e+02	-2.314560e+02	-8.412044e+01	-2.133878e+02	-8.477992e+01	-2.429703e+02	-1.057822e+02	-1.267823e+02	-1.353602e+02	-1.709519e+02	-9.563582e+01	-1.700701e+02	-1.333709e+02
1.237000e+03	4.795755e+03	-4.015774e+02	-2.995987e+02	-2.019889e+02	-2.110634e+02	-2.086180e+02	-5.468167e+01	-1.935769e+02	-7.848628e+01	-2.211122e+02	-7.431311e+01	-9.596771e+01	-1.276734e+02	-1.447748e+02	-6.717683e+01	-1.438892e+02	-1.027530e+02
1.238000e+03	4.979749e+03	-2.784031e+02	-2.331370e+02	-1.235359e+02	-1.152088e+02	-1.619262e+02	-3.494957e+00	-1.529235e+02	-5.555343e+01	-1.775822e+02	-2.277301e+01	-4.332475e+01	-1.007606e+02	-9.600403e+01	-1.915200e+01	-9.606349e+01	-4.994404e+01
1.239000e+03	5.153015e+03	-1.008131e+02	-1.354482e+02	-1.426081e+01	1.080123e+01	-9.512514e+01	6.398193e+01	-9.529401e+01	-1.896293e+01	-1.164831e+02	4.448214e+01	2.588952e+01	-5.874102e+01	-3.024120e+01	4.262294e+01	-3.183187e+01	2.003995e+01
1.240000e+03	5.307814e+03	1.084732e+02	-1.906767e+01	1.118648e+02	1.505379e+02	-1.578067e+01	1.392635e+02	-2.761909e+01	2.601627e+01	-4.508151e+01	1.200160e+02	1.033087e+02	-8.149748e+00	4.398060e+01	1.099614e+02	4.056373e+01	9.850931e+01
1.241000e+03	5.440001e+03	3.201895e+02	9.989044e+01	2.375265e+02	2.848218e+02	6.572849e+01	2.121414e+02	4.103467e+01	7.266708e+01	2.722564e+01	1.943121e+02	1.786655e+02	4.321516e+01	1.165018e+02	1.736369e+02	1.111704e+02	1.744851e+02
1.242000e+03	5.548523e+03	5.035564e+02	2.044140e+02	3.449548e+02	3.947903e+02	1.379091e+02	2.722877e+02	1.008709e+02	1.139905e+02	9.042518e+01	2.572514e+02	2.414063e+02	8.770311e+01	1.771452e+02	2.248018e+02	1.699736e+02	2.366877e+02
1.243000e+03	5.634776e+03	6.318150e+02	2.795748e+02	4.190006e+02	4.648915e+02	1.902287e+02	3.108984e+02	1.430215e+02	1.439640e+02	1.356118e+02	2.998233e+02	2.824419e+02	1.191759e+02	2.173623e+02	2.562792e+02	2.085981e+02	2.756693e+02
1.244000e+03	5.702100e+03	6.870909e+02	3.152308e+02	4.497947e+02	4.853379e+02	2.151357e+02	3.221260e+02	1.611597e+02	1.586323e+02	1.565987e+02	3.157452e+02	2.957187e+02	1.340471e+02	2.316322e+02	2.635861e+02	2.217393e+02	2.855775e+02
1.245000e+03	5.755010e+03	6.635723e+02	3.079030e+02	4.344639e+02	4.536532e+02	2.095731e+02	3.040721e+02	1.527473e+02	1.568089e+02	1.510934e+02	3.026554e+02	2.793042e+02	1.318054e+02	2.183663e+02	2.455888e+02	2.080542e+02	2.651583e+02
1.246000e+03	5.797492e+03	5.683970e+02	2.614408e+02	3.775650e+02	3.750780e+02	1.756291e+02	2.591627e+02	1.196372e+02	1.402508e+02	1.211887e+02	2.626077e+02	2.357586e+02	1.149542e+02	1.801572e+02	2.047183e+02	1.703524e+02	2.178339e+02
1.247000e+03	5.830396e+03	4.201439e+02	1.863185e+02	2.901613e+02	2.617446e+02	1.201580e+02	1.938059e+02	6.786294e+01	1.132793e+02	7.303763e+01	2.017424e+02	1.717047e+02	8.841656e+01	1.233255e+02	1.466813e+02	1.150592e+02	1.509398e+02
1.248000e+03	5.848971e+03	2.452693e+02	9.765979e+01	1.877148e+02	1.306840e+02	5.343003e+01	1.173308e+02	6.598698e+00	8.192350e+01	1.573474e+01	1.291741e+02	9.665484e+01	5.853994e+01	5.682872e+01	7.963115e+01	5.105189e+01	7.435603e+01
1.249000e+03	5.842258e+03	7.313732e+01	1.232508e+01	8.717052e+01	8.922407e-01	-1.292041e+01	4.033424e+01	-5.355828e+01	5.274086e+01	-4.041704e+01	5.529600e+01	2.129082e+01	3.187614e+01	-9.312286e+00	1.283344e+01	-1.193924e+01	-1.190858e+00
1.250000e+03	5.795576e+03	-6.948382e+01	-5.440202e+01	3.757052e+00	-1.101004e+02	-6.822336e+01	-2.729624e+01	-1.026631e+02	3.152762e+01	-8.593039e+01	-1.017716e+01	-4.449767e+01	1.393874e+01	-6.581830e+01	-4.500703e+01	-6.508888e+01	-6.589951e+01
1.251000e+03	5.695831e+03	-1.634095e+02	-9.184117e+01	-5.186850e+01	-1.894903e+02	-1.048619e+02	-7.827225e+01	-1.334083e+02	2.217108e+01	-1.140123e+02	-6.002123e+01	-9.342675e+01	8.160280e+00	-1.058471e+02	-8.742572e+01	-1.020581e+02	-1.124921e+02
1.252000e+03	5.537639e+03	-2.003780e+02	-9.591226e+01	-7.546911e+01	-2.314834e+02	-1.196140e+02	-1.092250e+02	-1.425170e+02	2.591451e+01	-1.218261e+02	-9.074207e+01	-1.220629e+02	1.528323e+01	-1.261811e+02	-1.114394e+02	-1.200363e+02	-1.373594e+02
1.253000e+03	5.327545e+03	-1.837929e+02	-6.949605e+01	-6.952512e+01	-2.378904e+02	-1.138761e+02	-1.210473e+02	-1.311290e+02	4.126446e+01	-1.107591e+02	-1.028939e+02	-1.311459e+02	3.338113e+01	-1.275590e+02	-1.179316e+02	-1.199506e+02	-1.409662e+02
1.254000e+03	5.084350e+03	-1.265033e+02	-2.093639e+01	-4.177803e+01	-2.167440e+02	-9.268444e+01	-1.181028e+02	-1.040186e+02	6.463623e+01	-8.557052e+01	-1.003451e+02	-1.248479e+02	5.858045e+01	-1.140030e+02	-1.109890e+02	-1.057468e+02	-1.273326e+02
1.255000e+03	4.835488e+03	-4.617393e+01	3.895009e+01	-2.355765e+00	-1.793017e+02	-6.282123e+01	-1.065235e+02	-6.785874e+01	9.160868e+01	-5.265587e+01	-8.868313e+01	-1.091531e+02	8.634077e+01	-9.131322e+01	-9.635734e+01	-8.293688e+01	-1.026599e+02
1.256000e+03	4.611145e+03	4.029554e+01	1.004072e+02	3.963614e+01	-1.364196e+02	-3.063074e+01	-9.216400e+01	-2.910741e+01	1.184140e+02	-1.800363e+01	-7.327290e+01	-8.986872e+01	1.129215e+02	-6.521396e+01	-7.953525e+01	-5.687746e+01	-7.348610e+01
1.257000e+03	4.438539e+03	1.214114e+02	1.575782e+02	7.888762e+01	-9.555124e+01	-2.942248e-01	-7.891539e+01	7.741655e+00	1.431465e+02	1.443530e+01	-5.763836e+01	-7.094156e+01	1.365367e+02	-3.978606e+01	-6.418350e+01	-3.136124e+01	-4.496737e+01
1.258000e+03	4.338039e+03	1.932549e+02	2.096386e+02	1.150429e+02	-5.936425e+01	2.686796e+01	-6.792665e+01	4.094566e+01	1.662387e+02	4.340378e+01	-4.272370e+01	-5.364537e+01	1.577752e+02	-1.670181e+01	-5.138788e+01	-7.969541e+00	-1.985177e+01
1.259000e+03	4.321560e+03	2.587097e+02	2.599200e+02	1.519203e+02	-2.624731e+01	5.193813e+01	-5.788132e+01	7.115969e+01	1.900409e+02	6.988308e+01	-2.721616e+01	-3.683781e+01	1.791430e+02	4.571037e+00	-3.993300e+01	1.369381e+01	1.591283e+00
1.260000e+03	4.392715e+03	3.245556e+02	3.136093e+02	1.953073e+02	7.837044e+00	7.715967e+01	-4.602872e+01	1.002740e+02	2.177274e+02	9.588611e+01	-8.649088e+00	-1.802808e+01	2.039612e+02	2.584863e+01	-2.729867e+01	3.514616e+01	2.084483e+01
1.261000e+03	4.548132e+03	3.980727e+02	3.752211e+02	2.504414e+02	4.721347e+01	1.045964e+02	-2.939507e+01	1.301066e+02	2.520506e+02	1.231749e+02	1.531614e+01	5.325131e+00	2.351288e+02	4.912178e+01	-1.081288e+01	5.804005e+01	4.010444e+01
1.262000e+03	4.779738e+03	4.847628e+02	4.470404e+02	3.203275e+02	9.507025e+01	1.353366e+02	-5.631641e+00	1.616022e+02	2.945051e+02	1.525400e+02	4.603671e+01	3.488634e+01	2.742936e+02	7.578096e+01	1.157543e+01	8.351230e+01	6.145510e+01
1.263000e+03	5.077822e+03	5.879162e+02	5.291135e+02	4.054855e+02	1.531818e+02	1.695178e+02	2.673792e+01	1.948371e+02	3.452102e+02	1.839081e+02	8.376355e+01	7.120558e+01	3.217245e+02	1.064292e+02	4.113169e+01	1.120714e+02	8.655395e+01
1.264000e+03	5.434091e+03	7.095508e+02	6.204486e+02	5.048801e+02	2.224657e+02	2.069609e+02	6.851522e+01	2.296419e+02	4.034062e+02	2.170470e+02	1.281010e+02	1.140696e+02	3.767815e+02	1.411659e+02	7.860450e+01	1.438859e+02	1.167324e+02
1.265000e+03	5.842988e+03	8.514199e+02	7.204020e+02	6.171223e+02	3.035803e+02	2.478611e+02	1.200583e+02	2.663024e+02	4.681121e+02	2.522940e+02	1.785797e+02	1.630190e+02	4.385448e+02	1.799641e+02	1.244940e+02	1.791135e+02	1.531546e+02
1.266000e+03	6.299516e+03	1.014797e+03	8.291455e+02	7.409262e+02	3.968166e+02	2.929810e+02	1.811604e+02	3.057807e+02	5.384096e+02	2.907389e+02	2.348427e+02	2.175580e+02	5.060850e+02	2.227555e+02	1.789205e+02	2.179248e+02	1.966551e+02
1.267000e+03	6.793268e+03	1.198600e+03	9.466882e+02	8.743103e+02	5.010707e+02	3.431040e+02	2.504746e+02	3.492013e+02	6.130640e+02	3.336256e+02	2.962203e+02	2.768206e+02	5.780906e+02	2.690640e+02	2.409977e+02	2.601021e+02	2.471315e+02
1.268000e+03	7.301025e+03	1.396623e+03	1.070840e+03	1.012874e+03	6.123679e+02	3.979672e+02	3.247513e+02	3.968042e+02	6.896233e+02	3.812161e+02	3.608834e+02	3.388357e+02	6.519895e+02	3.173563e+02	3.080010e+02	3.043956e+02	3.027237e+02
1.269000e+03	7.782398e+03	1.595453e+03	1.195240e+03	1.148175e+03	7.228458e+02	4.552378e+02	3.983928e+02	4.469080e+02	7.635307e+02	4.317053e+02	4.250812e+02	3.998427e+02	7.230914e+02	3.645040e+02	3.748603e+02	3.480127e+02	3.592533e+02
1.270000e+03	8.182818e+03	1.774681e+03	1.308699e+03	1.267391e+03	8.210251e+02	5.101397e+02	4.637828e+02	4.954751e+02	8.278890e+02	4.808041e+02	4.830027e+02	4.541681e+02	7.843850e+02	4.057645e+02	4.344466e+02	3.866039e+02	4.103737e+02
1.271000e+03	8.445110e+03	1.910041e+03	1.396593e+03	1.354936e+03	8.936478e+02	5.560635e+02	5.125314e+02	5.366070e+02	8.742699e+02	5.223142e+02	5.275429e+02	4.949529e+02	8.273886e+02	4.354616e+02	4.787810e+02	4.148900e+02	4.485927e+02
1.272000e+03	8.526244e+03	1.978795e+03	1.444036e+03	1.395786e+03	9.286230e+02	5.860414e+02	5.373435e+02	5.638655e+02	8.944671e+02	5.495581e+02	5.518269e+02	5.156191e+02	8.439532e+02	4.482264e+02	5.008588e+02	4.277848e+02	4.669289e+02
1.273000e+03	8.412375e+03	1.965548e+03	1.439762e+03	1.379416e+03	9.180789e+02	5.945587e+02	5.338899e+02	5.719363e+02	8.826176e+02	5.571327e+02	5.509748e+02	5.115938e+02	8.284345e+02	4.403820e+02	4.964624e+02	4.216343e+02	4.606549e+02
1.274000e+03	8.125247e+03	1.866377e+03	1.379245e+03	1.302886e+03	8.604271e+02	5.790198e+02	5.019994e+02	5.580048e+02	8.369102e+02	5.423229e+02	5.234550e+02	4.816496e+02	7.794248e+02	4.109724e+02	4.653014e+02	3.951407e+02	4.285131e+02
1.275000e+03	7.716934e+03	1.689841e+03	1.265953e+03	1.171947e+03	7.607371e+02	5.403319e+02	4.457362e+02	5.223548e+02	7.602663e+02	5.056744e+02	4.715385e+02	4.283523e+02	7.004021e+02	3.620729e+02	4.110780e+02	3.496714e+02	3.729948e+02
1.276000e+03	7.255491e+03	1.454670e+03	1.110426e+03	9.998452e+02	6.293822e+02	4.824567e+02	3.723524e+02	4.680473e+02	6.598168e+02	4.505977e+02	4.007300e+02	3.574691e+02	5.991094e+02	2.983006e+02	3.404933e+02	2.888987e+02	2.996411e+02
1.277000e+03	6.808328e+03	1.185238e+03	9.277490e+02	8.044349e+02	4.795417e+02	4.111939e+02	2.905180e+02	3.999047e+02	5.454743e+02	3.822641e+02	3.184488e+02	2.765925e+02	4.859812e+02	2.257426e+02	2.615890e+02	2.179603e+02	2.156830e+02
1.278000e+03	6.430510e+03	9.065271e+02	7.344648e+02	6.046994e+02	3.244696e+02	3.327242e+02	2.084424e+02	3.232622e+02	4.281685e+02	3.062866e+02	2.324625e+02	1.934983e+02	3.722333e+02	1.506945e+02	1.820062e+02	1.424690e+02	1.285335e+02
1.279000e+03	6.161678e+03	6.402103e+02	5.459707e+02	4.177920e+02	1.753668e+02	2.524419e+02	1.324534e+02	2.429516e+02	3.182914e+02	2.276705e+02	1.495797e+02	1.147745e+02	2.682101e+02	7.861424e+01	1.076839e+02	6.768676e+01	4.460834e+01
1.280000e+03	6.030086e+03	4.026545e+02	3.749702e+02	2.572218e+02	4.033780e+01	1.743851e+02	6.635138e+01	1.628074e+02	2.246435e+02	1.503187e+02	7.490471e+01	4.506140e+01	1.823166e+02	1.355088e+01	4.228707e+01	-1.947115e+00	-3.125679e+01
1.281000e+03	6.058324e+03	2.047665e+02	2.309734e+02	1.322070e+02	-7.555474e+01	1.012723e+02	1.154559e+01	8.571904e+01	1.538729e+02	7.709308e+01	1.168380e+01	-1.304339e+01	1.205248e+02	-4.190364e+01	-1.263171e+01	-6.292261e+01	-9.580549e+01
1.282000e+03	6.264796e+03	5.291510e+01	1.204191e+02	4.777457e+01	-1.694916e+02	3.491265e+01	-3.225947e+01	1.403870e+01	1.102003e+02	1.021187e+01	-3.844134e+01	-5.859964e+01	8.621977e+01	-8.627984e+01	-5.695880e+01	-1.125342e+02	-1.470028e+02
1.283000e+03	6.657981e+03	-5.002006e+01	4.688113e+01	5.070081e+00	-2.399034e+02	-2.332882e+01	-6.617719e+01	-4.995404e+01	9.520367e+01	-4.832931e+01	-7.504443e+01	-9.175579e+01	8.012103e+01	-1.187704e+02	-9.117698e+01	-1.487297e+02	-1.836373e+02
1.284000e+03	7.225235e+03	-1.041760e+02	1.099379e+01	1.524365e+00	-2.858133e+02	-7.226304e+01	-9.138480e+01	-1.038140e+02	1.075630e+02	-9.657623e+01	-9.861332e+01	-1.132703e+02	1.001471e+02	-1.389113e+02	-1.156982e+02	-1.701204e+02	-2.051489e+02
1.285000e+03	7.921880e+03	-1.130057e+02	1.006531e+01	3.085428e+01	-3.068465e+02	-1.109093e+02	-1.087296e+02	-1.450856e+02	1.428532e+02	-1.327956e+02	-1.104312e+02	-1.242792e+02	1.412980e+02	-1.465816e+02	-1.306170e+02	-1.762367e+02	-2.117955e+02
1.286000e+03	8.667567e+03	-8.399092e+01	3.767722e+01	8.318866e+01	-3.038996e+02	-1.387681e+02	-1.187579e+02	-1.718450e+02	1.936236e+02	-1.559551e+02	-1.125893e+02	-1.263116e+02	1.957935e+02	-1.423265e+02	-1.359468e+02	-1.679615e+02	-2.050650e+02
1.287000e+03	9.354723e+03	-2.901793e+01	8.375893e+01	1.457472e+02	-2.800860e+02	-1.561570e+02	-1.220489e+02	-1.834323e+02	2.500362e+02	-1.662875e+02	-1.079784e+02	-1.214176e+02	2.537439e+02	-1.278194e+02	-1.321819e+02	-1.479140e+02	-1.880576e+02
1.288000e+03	9.869161e+03	3.637349e+01	1.355684e+02	2.043775e+02	-2.413235e+02	-1.644002e+02	-1.196027e+02	-1.810483e+02	3.012015e+02	-1.656449e+02	-1.000905e+02	-1.122091e+02	3.044883e+02	-1.061466e+02	-1.208502e+02	-1.204839e+02	-1.654921e+02
1.289000e+03	1.011761e+04	9.525400e+01	1.796842e+02	2.458917e+02	-1.959781e+02	-1.657199e+02	-1.130098e+02	-1.678901e+02	3.370746e+02	-1.574034e+02	-9.254703e+01	-1.016501e+02	3.384601e+02	-8.162535e+01	-1.046958e+02	-9.129274e+01	-1.431033e+02
1.290000e+03	1.005333e+04	1.327336e+02	2.046310e+02	2.606856e+02	-1.533681e+02	-1.628147e+02	-1.042472e+02	-1.486603e+02	3.504710e+02	-1.458539e+02	-8.842267e+01	-9.257250e+01	3.491294e+02	-5.905456e+01	-8.728837e+01	-6.608974e+01	-1.264749e+02
1.291000e+03	9.690997e+03	1.394892e+02	2.033564e+02	2.448234e+02	-1.215115e+02	-1.582606e+02	-9.515786e+01	-1.285593e+02	3.385870e+02	-1.352446e+02	-8.957316e+01	-8.706038e+01	3.344162e+02	-4.258227e+01	-7.214302e+01	-4.937762e+01	-1.196717e+02
1.292000e+03	9.105140e+03	1.140494e+02	1.746984e+02	2.008250e+02	-1.049457e+02	-1.539613e+02	-8.684858e+01	-1.121022e+02	3.034986e+02	-1.288136e+02	-9.622548e+01	-8.594664e+01	2.970676e+02	-3.459604e+01	-6.170094e+01	-4.325287e+01	-1.242119e+02
1.293000e+03	8.412483e+03	6.288618e+01	1.233141e+02	1.368338e+02	-1.035034e+02	-1.508497e+02	-7.930147e+01	-1.021852e+02	2.514537e+02	-1.281516e+02	-1.070005e+02	-8.864082e+01	2.438485e+02	-3.507353e+01	-5.660226e+01	-4.690839e+01	-1.388162e+02
1.294000e+03	7.743477e+03	-1.749889e+00	5.813157e+01	6.444776e+01	-1.125408e+02	-1.489174e+02	-7.138778e+01	-9.969910e+01	1.912066e+02	-1.330849e+02	-1.193636e+02	-9.336321e+01	1.838225e+02	-4.165091e+01	-5.555304e+01	-5.699463e+01	-1.600259e+02
1.295000e+03	7.211720e+03	-6.543235e+01	-1.009263e+01	-4.057159e+00	-1.245185e+02	-1.475090e+02	-6.129416e+01	-1.037469e+02	1.319443e+02	-1.420443e+02	-1.303354e+02	-9.769658e+01	1.262869e+02	-5.038007e+01	-5.582616e+01	-6.869932e+01	-1.834004e+02
1.296000e+03	6.889884e+03	-1.153618e+02	-7.132895e+01	-5.831330e+01	-1.313556e+02	-1.457372e+02	-4.721671e+01	-1.123019e+02	8.139214e+01	-1.527259e+02	-1.372368e+02	-9.927555e+01	7.893059e+01	-5.690560e+01	-5.420096e+01	-7.716231e+01	-2.047968e+02
1.297000e+03	6.798182e+03	-1.433234e+02	-1.183299e+02	-9.173087e+01	-1.268180e+02	-1.428967e+02	-2.811705e+01	-1.230502e+02	4.449049e+01	-1.628226e+02	-1.382955e+02	-9.644348e+01	4.657117e+01	-5.769934e+01	-4.803756e+01	-7.878918e+01	-2.213038e+02
1.298000e+03	6.907330e+03	-1.472744e+02	-1.478907e+02	-1.024813e+02	-1.083219e+02	-1.388066e+02	-4.343729e+00	-1.341793e+02	2.277373e+01	-1.706643e+02	-1.330420e+02	-8.876394e+01	3.056770e+01	-5.103262e+01	-3.619534e+01	-7.213642e+01	-2.316563e+02
1.299000e+03	7.153729e+03	-1.314866e+02	-1.612480e+02	-9.361576e+01	-7.776109e+01	-1.340394e+02	2.205338e+01	-1.449375e+02	1.442046e+01	-1.756663e+02	-1.224708e+02	-7.729993e+01	2.886312e+01	-3.746722e+01	-1.956682e+01	-5.820502e+01	-2.361923e+02
1.300000e+03	7.461228e+03	-1.053265e+02	-1.635816e+02	-7.231315e+01	-4.115608e+01	-1.299522e+02	4.747142e+01	-1.558240e+02	1.491035e+01	-1.784882e+02	-1.089170e+02	-6.455014e+01	3.661319e+01	-1.974132e+01	-1.057484e+00	-4.010963e+01	-2.364937e+02
1.301000e+03	7.762129e+03	-8.077046e+01	-1.625645e+02	-4.819388e+01	-7.093128e+00	-1.283975e+02	6.746616e+01	-1.683008e+02	1.823167e+01	-1.807912e+02	-9.556798e+01	-5.392438e+01	4.738437e+01	-2.022980e+00	1.507966e+01	-2.218327e+01	-2.347998e+02
1.302000e+03	8.010798e+03	-6.891496e+01	-1.660435e+02	-3.078068e+01	1.581792e+01	-1.310518e+02	7.797415e+01	-1.840110e+02	1.850355e+01	-1.845413e+02	-8.558574e+01	-4.874213e+01	5.481565e+01	1.135269e+01	2.449175e+01	-8.682863e+00	-2.332252e+02
1.303000e+03	8.186365e+03	-7.619493e+01	-1.793082e+02	-2.659796e+01	2.185734e+01	-1.384898e+02	7.674822e+01	-2.036824e+02	1.168638e+01	-1.909884e+02	-8.100289e+01	-5.096620e+01	5.441510e+01	1.734712e+01	2.425658e+01	-2.406031e+00	-2.328736e+02
1.304000e+03	8.285553e+03	-1.015264e+02	-2.028255e+02	-3.683863e+01	1.052901e+01	-1.493664e+02	6.449168e+01	-2.261184e+02	-3.131836e+00	-1.996874e+02	-8.177000e+01	-6.012614e+01	4.494046e+01	1.539623e+01	1.417754e+01	-3.652586e+00	-2.331010e+02
1.305000e+03	8.310804e+03	-1.356739e+02	-2.314302e+02	-5.661527e+01	-1.265732e+01	-1.601671e+02	4.515595e+01	-2.477746e+02	-2.338177e+01	-2.080422e+02	-8.541067e+01	-7.295519e+01	2.880301e+01	7.815559e+00	-2.712599e+00	-9.945923e+00	-2.312874e+02
1.306000e+03	8.260484e+03	-1.634762e+02	-2.555220e+02	-7.631519e+01	-3.744051e+01	-1.658140e+02	2.513760e+01	-2.632481e+02	-4.381012e+01	-2.117058e+02	-8.755405e+01	-8.403799e+01	1.124498e+01	-7.996740e-01	-2.074797e+01	-1.669118e+01	-2.233686e+02
1.307000e+03	8.126180e+03	-1.683209e+02	-2.639418e+02	-8.464908e+01	-5.172264e+01	-1.610103e+02	1.159114e+01	-2.666013e+02	-5.816151e+01	-2.057743e+02	-8.321262e+01	-8.730628e+01	-1.431546e+00	-4.974920e+00	-3.316723e+01	-1.855211e+01	-2.050514e+02
1.308000e+03	7.897842e+03	-1.370894e+02	-2.473510e+02	-7.212611e+01	-4.496750e+01	-1.417840e+02	1.051454e+01	-2.530014e+02	-6.105944e+01	-1.862859e+02	-6.827434e+01	-7.777483e+01	-3.847542e+00	3.887726e-02	-3.398224e+01	-1.098087e+01	-1.732504e+02
1.309000e+03	7.573195e+03	-6.347769e+01	-2.006622e+02	-3.345894e+01	-1.067039e+01	-1.065406e+02	2.539202e+01	-2.199704e+02	-4.931400e+01	-1.513427e+02	-4.054719e+01	-5.276575e+01	7.092381e+00	1.714710e+01	-1.940590e+01	8.740029e+00	-1.271081e+02
1.310000e+03	7.165735e+03	5.156277e+01	-1.236051e+02	3.199167e+01	5.298064e+01	-5.617805e+01	5.688380e+01	-1.677483e+02	-2.221514e+01	-1.013846e+02	5.547801e-02	-1.214976e+01	3.194080e+01	4.717898e+01	1.168024e+01	4.130414e+01	-6.814505e+01
1.311000e+03	6.706699e+03	2.019460e+02	-1.957637e+01	1.215063e+02	1.441048e+02	6.655132e+00	1.034850e+02	-9.877492e+01	1.906014e+01	-3.863140e+01	5.209930e+01	4.231037e+01	6.941253e+01	8.941834e+01	5.820008e+01	8.590693e+01	4.506135e-01
1.312000e+03	6.239756e+03	3.794483e+02	1.061439e+02	2.308577e+02	2.587438e+02	7.860535e+01	1.625701e+02	-1.678127e+01	7.233291e+01	3.381574e+01	1.134548e+02	1.079364e+02	1.174095e+02	1.423466e+02	1.177808e+02	1.409630e+02	7.491609e+01
1.313000e+03	5.810660e+03	5.755986e+02	2.475133e+02	3.553701e+02	3.918417e+02	1.562863e+02	2.311064e+02	7.387470e+01	1.349345e+02	1.125830e+02	1.817456e+02	1.817371e+02	1.736325e+02	2.039898e+02	1.874021e+02	2.044371e+02	1.517363e+02
1.314000e+03	5.456096e+03	7.814408e+02	3.975348e+02	4.895353e+02	5.369642e+02	2.362182e+02	3.056348e+02	1.682714e+02	2.035433e+02	1.939949e+02	2.541207e+02	2.602795e+02	2.354240e+02	2.716155e+02	2.634095e+02	2.735494e+02	2.277765e+02
1.315000e+03	5.195797e+03	9.857611e+02	5.471781e+02	6.256612e+02	6.851816e+02	3.142270e+02	3.816927e+02	2.605530e+02	2.736039e+02	2.735765e+02	3.265852e+02	3.390462e+02	2.990867e+02	3.410640e+02	3.410393e+02	3.441341e+02	2.997957e+02
1.316000e+03	5.030303e+03	1.173614e+03	6.846445e+02	7.528689e+02	8.243391e+02	3.849286e+02	4.533100e+02	3.437018e+02	3.389798e+02	3.456655e+02	3.935214e+02	4.119393e+02	3.593598e+02	4.063733e+02	4.140437e+02	4.102846e+02	3.638574e+02
1.317000e+03	4.944646e+03	1.327065e+03	7.962113e+02	8.577703e+02	9.399639e+02	4.419609e+02	5.132822e+02	4.100506e+02	3.924674e+02	4.037431e+02	4.480408e+02	4.716255e+02	4.097430e+02	4.603177e+02	4.750611e+02	4.648899e+02	4.152660e+02
1.318000e+03	4.916395e+03	1.428915e+03	8.690628e+02	9.273044e+02	1.018246e+03	4.792333e+02	5.545335e+02	4.527343e+02	4.273500e+02	4.417102e+02	4.834007e+02	5.109948e+02	4.439183e+02	4.960275e+02	5.170073e+02	5.012242e+02	4.493785e+02
1.319000e+03	4.925410e+03	1.468405e+03	8.953283e+02	9.529695e+02	1.050326e+03	4.928587e+02	5.722499e+02	4.676977e+02	4.395542e+02	4.557695e+02	4.951108e+02	5.253602e+02	4.578738e+02	5.092415e+02	5.351581e+02	5.151527e+02	4.631116e+02
1.320000e+03	4.962213e+03	1.446514e+03	8.756690e+02	9.347261e+02	1.036185e+03	4.829664e+02	5.659329e+02	4.554385e+02	4.295252e+02	4.461376e+02	4.828919e+02	5.145185e+02	4.518492e+02	5.002865e+02	5.291021e+02	5.070685e+02	4.565077e+02
1.321000e+03	5.032191e+03	1.378243e+03	8.206806e+02	8.827062e+02	9.862912e+02	4.545063e+02	5.403881e+02	4.216408e+02	4.029145e+02	4.177586e+02	4.515741e+02	4.836898e+02	4.311462e+02	4.748508e+02	5.036387e+02	4.826396e+02	4.335702e+02
1.322000e+03	5.154004e+03	1.290305e+03	7.491560e+02	8.156309e+02	9.199059e+02	4.165248e+02	5.050187e+02	3.762454e+02	3.695951e+02	3.795526e+02	4.103934e+02	4.427428e+02	4.052495e+02	4.430265e+02	4.680451e+02	4.518503e+02	4.018359e+02
1.323000e+03	5.352252e+03	1.214518e+03	6.835161e+02	7.561586e+02	8.602830e+02	3.800105e+02	4.714769e+02	3.311356e+02	3.411859e+02	3.423216e+02	3.707886e+02	4.037980e+02	3.853789e+02	4.167735e+02	4.337868e+02	4.264891e+02	3.706762e+02
1.324000e+03	5.646462e+03	1.179006e+03	6.438577e+02	7.246496e+02	8.282511e+02	3.550101e+02	4.504184e+02	2.971675e+02	3.278729e+02	3.159766e+02	3.434056e+02	3.779751e+02	3.812486e+02	4.065908e+02	4.113838e+02	4.168638e+02	3.488582e+02
1.325000e+03	6.039980e+03	1.200202e+03	6.426169e+02	7.334800e+02	8.363402e+02	3.480080e+02	4.484905e+02	2.815261e+02	3.355966e+02	3.070130e+02	3.353314e+02	3.723996e+02	3.981482e+02	4.185052e+02	4.074943e+02	4.288461e+02	3.422030e+02
1.326000e+03	6.512863e+03	1.278413e+03	6.815931e+02	7.838297e+02	8.854211e+02	3.604517e+02	4.665950e+02	2.862386e+02	3.645391e+02	3.170482e+02	3.484654e+02	3.884794e+02	4.353582e+02	4.523830e+02	4.231900e+02	4.622346e+02	3.521334e+02
1.327000e+03	7.021906e+03	1.398332e+03	7.521918e+02	8.659226e+02	9.648881e+02	3.888544e+02	4.999699e+02	3.082354e+02	4.093551e+02	3.428327e+02	3.794905e+02	4.219641e+02	4.864205e+02	5.020937e+02	4.539463e+02	5.109478e+02	3.755550e+02
1.328000e+03	7.508637e+03	1.534096e+03	8.386006e+02	9.624432e+02	1.056150e+03	4.263177e+02	5.399448e+02	3.408003e+02	4.609752e+02	3.776234e+02	4.213125e+02	4.646350e+02	5.411142e+02	5.574083e+02	4.912481e+02	5.649095e+02	4.060237e+02
1.329000e+03	7.913200e+03	1.656966e+03	9.226420e+02	1.053774e+03	1.138098e+03	4.648326e+02	5.766557e+02	3.758028e+02	5.092829e+02	4.133591e+02	4.653498e+02	5.069221e+02	5.884039e+02	6.069306e+02	5.251792e+02	6.129268e+02	4.357269e+02
1.330000e+03	8.189615e+03	1.742939e+03	9.885944e+02	1.123194e+03	1.192677e+03	4.975103e+02	6.017509e+02	4.059165e+02	5.457307e+02	4.428655e+02	5.038363e+02	5.405005e+02	6.193355e+02	6.410670e+02	5.471028e+02	6.455806e+02	4.575839e+02
1.331000e+03	8.317135e+03	1.777923e+03	1.026461e+03	1.160397e+03	1.208853e+03	5.200206e+02	6.102547e+02	4.261309e+02	5.650774e+02	4.613870e+02	5.314126e+02	5.600487e+02	6.289607e+02	6.541069e+02	5.516173e+02	6.572401e+02	4.668206e+02
1.332000e+03	8.303756e+03	1.759224e+03	1.032898e+03	1.162467e+03	1.184034e+03	5.309027e+02	6.011663e+02	4.342160e+02	5.658365e+02	4.670658e+02	5.456384e+02	5.637673e+02	6.168061e+02	6.448898e+02	5.373254e+02	6.467098e+02	4.616342e+02
1.333000e+03	8.180912e+03	1.693547e+03	1.009960e+03	1.132502e+03	1.122955e+03	5.308768e+02	5.768616e+02	4.302294e+02	5.495421e+02	4.604237e+02	5.465074e+02	5.527538e+02	5.859739e+02	6.160822e+02	5.064043e+02	6.165477e+02	4.429288e+02
1.334000e+03	7.991727e+03	1.592872e+03	9.626167e+02	1.076847e+03	1.034894e+03	5.216430e+02	5.417361e+02	4.155016e+02	5.193606e+02	4.432620e+02	5.353908e+02	5.297170e+02	5.414386e+02	5.725660e+02	4.633511e+02	5.715351e+02	4.134103e+02
1.335000e+03	7.777472e+03	1.470077e+03	8.962612e+02	1.002270e+03	9.304466e+02	5.047578e+02	5.006706e+02	3.916474e+02	4.787184e+02	4.175490e+02	5.139597e+02	4.976438e+02	4.882961e+02	5.196570e+02	4.134582e+02	5.169770e+02	3.764794e+02
1.336000e+03	7.567161e+03	1.335835e+03	8.152198e+02	9.141199e+02	8.189719e+02	4.810330e+02	4.578185e+02	3.600181e+02	4.304716e+02	3.847547e+02	4.835195e+02	4.589078e+02	4.305887e+02	4.617911e+02	3.615371e+02	4.574206e+02	3.353317e+02
1.337000e+03	7.373553e+03	1.197487e+03	7.225839e+02	8.158978e+02	7.073087e+02	4.505903e+02	4.159905e+02	3.217143e+02	3.767866e+02	3.458039e+02	4.449193e+02	4.150200e+02	3.709697e+02	4.019954e+02	3.112016e+02	3.960913e+02	2.924898e+02
1.338000e+03	7.196009e+03	1.059642e+03	6.210309e+02	7.099748e+02	5.997706e+02	4.133924e+02	3.766450e+02	2.779767e+02	3.195376e+02	3.014999e+02	3.989073e+02	3.669144e+02	3.110612e+02	3.420845e+02	2.647507e+02	3.350040e+02	2.497690e+02
1.339000e+03	7.027923e+03	9.255713e+02	5.138669e+02	5.987246e+02	4.989321e+02	3.698846e+02	3.402824e+02	2.306052e+02	2.608075e+02	2.530658e+02	3.466230e+02	3.154586e+02	2.520977e+02	2.832443e+02	2.234628e+02	2.754546e+02	2.084947e+02
1.340000e+03	6.864808e+03	7.983410e+02	4.055318e+02	4.853041e+02	4.065336e+02	3.213813e+02	3.069360e+02	1.820772e+02	2.030960e+02	2.024420e+02	2.898957e+02	2.618466e+02	1.954065e+02	2.265860e+02	1.879968e+02	2.185242e+02	1.697169e+02
1.341000e+03	6.709231e+03	6.809683e+02	3.011834e+02	3.736169e+02	3.239555e+02	2.699917e+02	2.764822e+02	1.352223e+02	1.490503e+02	1.521389e+02	2.311551e+02	2.076540e+02	1.424614e+02	1.733692e+02	1.586301e+02	1.653152e+02	1.342316e+02
1.342000e+03	6.570487e+03	5.755487e+02	2.055020e+02	2.674963e+02	2.520618e+02	2.181171e+02	2.486449e+02	9.255027e+01	1.008230e+02	1.046844e+02	1.729732e+02	1.545429e+02	9.452371e+01	1.248274e+02	1.352137e+02	1.168402e+02	1.023772e+02
1.343000e+03	6.459394e+03	4.819458e+02	1.212816e+02	1.695729e+02	1.906228e+02	1.677570e+02	2.227732e+02	5.551458e+01	5.937605e+01	6.191056e+01	1.174475e+02	1.038037e+02	5.212635e+01	8.175400e+01	1.169288e+02	7.368741e+01	7.375051e+01
1.344000e+03	6.380945e+03	3.969552e+02	4.851073e+01	8.047791e+01	1.377998e+02	1.199561e+02	1.976291e+02	2.404869e+01	2.410781e+01	2.440766e+01	6.573051e+01	5.601233e+01	1.474803e+01	4.413523e+01	1.020830e+02	3.571051e+01	4.709075e+01
1.345000e+03	6.328564e+03	3.147019e+02	-1.554310e+01	-1.116509e+00	9.018876e+01	7.466752e+01	1.714519e+02	-3.387855e+00	-6.953354e+00	-8.585158e+00	1.795157e+01	1.103327e+01	-1.906841e+01	1.108529e+01	8.820154e+01	1.980156e+00	2.053111e+01
1.346000e+03	6.283136e+03	2.284687e+02	-7.515563e+01	-7.751041e+01	4.365814e+01	3.112824e+01	1.424296e+02	-2.921151e+01	-3.638918e+01	-3.876189e+01	-2.639373e+01	-3.157393e+01	-5.111839e+01	-1.881218e+01	7.254167e+01	-2.889213e+01	-7.753568e+00
1.347000e+03	6.217899e+03	1.334361e+02	-1.342535e+02	-1.503981e+02	-5.196212e+00	-1.138587e+01	1.094770e+02	-5.574493e+01	-6.631890e+01	-6.792993e+01	-6.773492e+01	-7.189921e+01	-8.266638e+01	-4.685837e+01	5.293472e+01	-5.814139e+01	-3.869964e+01
1.348000e+03	6.107712e+03	2.928578e+01	-1.945164e+02	-2.193743e+02	-5.752124e+01	-5.273649e+01	7.301074e+01	-8.421321e+01	-9.742205e+01	-9.708966e+01	-1.057101e+02	-1.090822e+02	-1.136687e+02	-7.355355e+01	2.865893e+01	-8.619228e+01	-7.165176e+01
1.349000e+03	5.939248e+03	-7.846409e+01	-2.542381e+02	-2.812279e+02	-1.112809e+02	-9.139659e+01	3.534542e+01	-1.140820e+02	-1.284559e+02	-1.257773e+02	-1.387838e+02	-1.410837e+02	-1.424496e+02	-9.818256e+01	9.656252e-01	-1.122596e+02	-1.041391e+02
1.350000e+03	5.718226e+03	-1.791138e+02	-3.084579e+02	-3.304390e+02	-1.614383e+02	-1.244855e+02	4.461212e-01	-1.430123e+02	-1.564968e+02	-1.519562e+02	-1.644148e+02	-1.650052e+02	-1.660302e+02	-1.188917e+02	-2.702406e+01	-1.344274e+02	-1.322972e+02
1.351000e+03	5.470910e+03	-2.593964e+02	-3.504107e+02	-3.608078e+02	-2.013298e+02	-1.484106e+02	-2.696957e+01	-1.674939e+02	-1.778619e+02	-1.725439e+02	-1.797617e+02	-1.779017e+02	-1.810517e+02	-1.332838e+02	-5.110265e+01	-1.502394e+02	-1.518490e+02
1.352000e+03	5.239354e+03	-3.072447e+02	-3.738148e+02	-3.676479e+02	-2.248171e+02	-1.599073e+02	-4.271092e+01	-1.839675e+02	-1.893983e+02	-1.844115e+02	-1.826707e+02	-1.778096e+02	-1.849819e+02	-1.393385e+02	-6.721519e+01	-1.576124e+02	-1.593383e+02
1.353000e+03	5.072099e+03	-3.154033e+02	-3.751521e+02	-3.496935e+02	-2.284441e+02	-1.570866e+02	-4.432479e+01	-1.900401e+02	-1.896587e+02	-1.854884e+02	-1.725480e+02	-1.645883e+02	-1.771485e+02	-1.363079e+02	-7.272670e+01	-1.557258e+02	-1.531973e+02
1.354000e+03	5.013403e+03	-2.835703e+02	-3.550320e+02	-3.099108e+02	-2.127537e+02	-1.400683e+02	-3.178687e+01	-1.853275e+02	-1.794951e+02	-1.755319e+02	-1.507363e+02	-1.402108e+02	-1.591757e+02	-1.252096e+02	-6.725064e+01	-1.455092e+02	-1.342813e+02
1.355000e+03	5.094132e+03	-2.182562e+02	-3.180427e+02	-2.547959e+02	-1.821984e+02	-1.109241e+02	-7.408094e+00	-1.715766e+02	-1.618032e+02	-1.562344e+02	-1.201939e+02	-1.083317e+02	-1.346009e+02	-1.086670e+02	-5.271860e+01	-1.294845e+02	-1.056816e+02
1.356000e+03	5.326371e+03	-1.304074e+02	-2.710833e+02	-1.923359e+02	-1.436159e+02	-7.293936e+01	2.500461e+01	-1.519850e+02	-1.404764e+02	-1.306017e+02	-8.456584e+01	-7.323717e+01	-1.077666e+02	-9.008986e+01	-3.265807e+01	-1.109620e+02	-7.187823e+01
1.357000e+03	5.702386e+03	-3.172539e+01	-2.208190e+02	-1.293900e+02	-1.038331e+02	-2.949796e+01	6.139410e+01	-1.299806e+02	-1.189608e+02	-1.018530e+02	-4.700296e+01	-3.854894e+01	-8.238139e+01	-7.247460e+01	-1.096150e+01	-9.287672e+01	-3.752793e+01
1.358000e+03	6.197313e+03	6.885515e+01	-1.713117e+02	-6.953474e+01	-6.735799e+01	1.692187e+01	9.860177e+01	-1.079640e+02	-9.899021e+01	-7.231640e+01	-9.221904e+00	-6.182280e+00	-6.030511e+01	-5.729595e+01	9.362723e+00	-7.672834e+01	-6.306745e+00
1.359000e+03	6.774439e+03	1.671518e+02	-1.228378e+02	-1.227132e+01	-3.510676e+01	6.520012e+01	1.349711e+02	-8.655556e+01	-8.002906e+01	-4.280375e+01	2.878408e+01	2.401752e+01	-4.104585e+01	-4.397001e+01	2.696619e+01	-6.208432e+01	1.980783e+01
1.360000e+03	7.391973e+03	2.635144e+02	-7.238954e+01	4.607186e+01	-4.675519e+00	1.152963e+02	1.702166e+02	-6.466471e+01	-5.965594e+01	-1.272874e+01	6.825174e+01	5.380490e+01	-2.216875e+01	-3.015515e+01	4.219031e+01	-4.688169e+01	4.061929e+01
1.361000e+03	8.010411e+03	3.607375e+02	-1.559595e+01	1.101413e+02	2.801638e+01	1.674172e+02	2.047094e+02	-4.032115e+01	-3.471306e+01	1.912182e+01	1.105908e+02	8.542570e+01	-4.370226e-01	-1.280324e+01	5.641266e+01	-2.841662e+01	5.722063e+01
1.362000e+03	8.599668e+03	4.612516e+02	5.083346e+01	1.830130e+02	6.648287e+01	2.210780e+02	2.385863e+02	-1.185659e+01	-2.717477e+00	5.355549e+01	1.562356e+02	1.203335e+02	2.679087e+01	1.045603e+01	7.106249e+01	-4.603627e+00	7.119919e+01
1.363000e+03	9.144757e+03	5.649440e+02	1.272205e+02	2.643455e+02	1.118129e+02	2.745343e+02	2.711251e+02	2.111273e+01	3.705285e+01	9.017207e+01	2.039059e+02	1.582487e+02	6.045368e+01	4.015756e+01	8.676181e+01	2.502491e+01	8.387499e+01
1.364000e+03	9.648361e+03	6.684747e+02	2.103182e+02	3.498941e+02	1.619216e+02	3.248565e+02	3.006504e+02	5.731348e+01	8.318708e+01	1.271353e+02	2.505712e+02	1.969000e+02	9.933684e+01	7.451340e+01	1.029286e+02	5.896653e+01	9.582160e+01
1.365000e+03	1.012855e+04	7.660979e+02	2.940722e+02	4.324113e+02	2.120633e+02	3.685789e+02	3.249363e+02	9.413578e+01	1.325128e+02	1.615632e+02	2.920903e+02	2.324839e+02	1.403337e+02	1.097341e+02	1.179207e+02	9.411758e+01	1.067449e+02
1.366000e+03	1.061079e+04	8.512742e+02	3.712179e+02	5.034096e+02	2.561999e+02	4.025899e+02	3.418413e+02	1.284018e+02	1.809201e+02	1.903012e+02	3.242212e+02	2.605997e+02	1.791985e+02	1.409687e+02	1.295535e+02	1.266242e+02	1.156430e+02
1.367000e+03	1.111523e+04	9.181412e+02	4.349475e+02	5.550607e+02	2.885578e+02	4.248549e+02	3.498473e+02	1.571822e+02	2.242305e+02	2.107196e+02	3.436035e+02	2.772976e+02	2.114634e+02	1.634810e+02	1.357141e+02	1.528252e+02	1.211111e+02
1.368000e+03	1.164287e+04	9.622688e+02	4.800697e+02	5.816698e+02	3.048251e+02	4.347054e+02	3.483033e+02	1.783336e+02	2.588235e+02	2.212482e+02	3.484112e+02	2.799307e+02	2.332599e+02	1.736888e+02	1.348494e+02	1.699609e+02	1.216931e+02
1.369000e+03	1.216587e+04	9.807513e+02	5.035155e+02	5.805265e+02	3.027890e+02	4.326806e+02	3.373840e+02	1.906568e+02	2.819733e+02	2.215435e+02	3.385804e+02	2.676592e+02	2.419416e+02	1.698429e+02	1.262516e+02	1.765257e+02	1.162485e+02
1.370000e+03	1.262746e+04	9.721515e+02	5.044166e+02	5.522315e+02	2.825376e+02	4.201236e+02	3.179354e+02	1.938004e+02	2.920451e+02	2.123724e+02	3.157001e+02	2.416012e+02	2.365213e+02	1.522956e+02	1.101902e+02	1.723379e+02	1.043318e+02
1.371000e+03	1.295390e+04	9.368167e+02	4.840931e+02	5.006782e+02	2.464448e+02	3.988031e+02	2.913951e+02	1.881273e+02	2.887226e+02	1.953710e+02	2.827186e+02	2.046937e+02	2.179447e+02	1.234083e+02	8.797010e+01	1.584664e+02	8.654227e+01
1.372000e+03	1.307601e+04	8.776392e+02	4.460926e+02	4.327374e+02	1.990194e+02	3.707342e+02	2.598437e+02	1.746892e+02	2.732880e+02	1.728051e+02	2.435677e+02	1.613121e+02	1.891513e+02	8.715237e+01	6.192261e+01	1.370889e+02	6.472124e+01
1.373000e+03	1.295311e+04	8.007590e+02	3.961187e+02	3.575171e+02	1.464809e+02	3.381789e+02	2.260661e+02	1.552837e+02	2.487744e+02	1.473450e+02	2.027019e+02	1.166589e+02	1.547951e+02	4.843403e+01	3.524052e+01	1.112326e+02	4.183817e+01
1.374000e+03	1.258947e+04	7.154125e+02	3.414986e+02	2.850330e+02	9.584814e+01	3.036537e+02	1.934013e+02	1.324205e+02	2.197163e+02	1.217832e+02	1.644954e+02	7.593262e+01	1.205178e+02	1.218597e+01	1.153896e+01	8.430128e+01	2.146157e+01
1.375000e+03	1.203622e+04	6.323910e+02	2.899530e+02	2.243207e+02	5.349500e+01	2.697414e+02	1.652239e+02	1.090164e+02	1.913312e+02	9.862281e+01	1.324962e+02	4.336444e+01	9.180647e+01	-1.764583e+01	-5.887033e+00	5.937425e+01	6.868912e+00
1.376000e+03	1.137701e+04	5.612952e+02	2.478104e+02	1.813679e+02	2.348377e+01	2.386388e+02	1.441141e+02	8.777956e+01	1.682513e+02	7.955986e+01	1.086693e+02	2.132208e+01	7.268387e+01	-3.897925e+01	-1.495811e+01	3.843452e+01	4.450479e-02
1.377000e+03	1.070314e+04	5.075606e+02	2.182405e+02	1.575436e+02	6.289987e+00	2.115743e+02	1.310051e+02	7.046553e+01	1.532214e+02	6.501937e+01	9.288988e+01	9.759461e+00	6.464326e+01	-5.204302e+01	-1.554417e+01	2.182743e+01	9.403422e-01
1.378000e+03	1.008773e+04	4.705883e+02	2.002807e+02	1.492126e+02	-1.439980e+00	1.883816e+02	1.247123e+02	5.733015e+01	1.463030e+02	5.397730e+01	8.295525e+01	6.259491e+00	6.625175e+01	-5.917582e+01	-9.687687e+00	8.241607e+00	7.343906e+00
1.379000e+03	9.568249e+03	4.439774e+02	1.892150e+02	1.488793e+02	-5.802722e+00	1.675060e+02	1.221383e+02	4.708160e+01	1.449730e+02	4.424056e+01	7.523342e+01	6.750378e+00	7.364526e+01	-6.396985e+01	-1.123929e+00	-4.684559e+00	1.548857e+01
1.380000e+03	9.142608e+03	4.179397e+02	1.783076e+02	1.476044e+02	-1.350421e+01	1.465392e+02	1.191684e+02	3.741998e+01	1.451314e+02	3.317369e+01	6.580659e+01	6.728133e+00	8.180215e+01	-7.001134e+01	5.805143e+00	-1.931529e+01	2.123584e+01
1.381000e+03	8.778006e+03	3.829716e+02	1.612755e+02	1.378850e+02	-2.946788e+01	1.231277e+02	1.119495e+02	2.597322e+01	1.426281e+02	1.864383e+01	5.173352e+01	2.600321e+00	8.616019e+01	-7.965331e+01	7.467132e+00	-3.694168e+01	2.139998e+01
1.382000e+03	8.427566e+03	3.332965e+02	1.345298e+02	1.159570e+02	-5.512595e+01	9.590818e+01	9.807045e+01	1.124404e+01	1.346954e+02	-1.702449e-01	3.197496e+01	-7.306001e+00	8.399438e+01	-9.326002e+01	1.993104e+00	-5.712686e+01	1.471196e+01
1.383000e+03	8.048101e+03	2.687557e+02	9.833545e+01	8.271878e+01	-8.803651e+01	6.510182e+01	7.721145e+01	-6.816842e+00	1.207492e+02	-2.241919e+01	7.654582e+00	-2.240714e+01	7.507909e+01	-1.091730e+02	-1.030861e+01	-7.773692e+01	2.077449e+00
1.384000e+03	7.613452e+03	1.945946e+02	5.653647e+01	4.305308e+01	-1.228739e+02	3.254886e+01	5.107824e+01	-2.680935e+01	1.023307e+02	-4.580029e+01	-1.839707e+01	-4.026459e+01	6.146634e+01	-1.243548e+02	-2.726986e+01	-9.561396e+01	-1.390497e+01
1.385000e+03	7.120402e+03	1.195244e+02	1.511701e+01	3.971817e+00	-1.532600e+02	1.204434e+00	2.274809e+01	-4.638994e+01	8.235012e+01	-6.723937e+01	-4.258355e+01	-5.750722e+01	4.657151e+01	-1.354078e+02	-4.569441e+01	-1.075759e+02	-2.989394e+01
1.386000e+03	6.586947e+03	5.307522e+01	-1.970636e+01	-2.759297e+01	-1.736239e+02	-2.567787e+01	-4.232518e+00	-6.302095e+01	6.404396e+01	-8.375629e+01	-6.157748e+01	-7.088190e+01	3.399932e+01	-1.395578e+02	-6.230933e+01	-1.113245e+02	-4.280036e+01
1.387000e+03	6.044924e+03	3.325818e+00	-4.310691e+01	-4.652895e+01	-1.803981e+02	-4.536087e+01	-2.662826e+01	-7.465068e+01	5.008842e+01	-9.320042e+01	-7.308561e+01	-7.805109e+01	2.656902e+01	-1.352703e+02	-7.446594e+01	-1.059410e+02	-5.046109e+01
1.388000e+03	5.530169e+03	-2.432941e+01	-5.250748e+01	-5.034055e+01	-1.722737e+02	-5.617934e+01	-4.194850e+01	-8.010999e+01	4.213122e+01	-9.464228e+01	-7.615511e+01	-7.792683e+01	2.582369e+01	-1.223747e+02	-8.040944e+01	-9.187138e+01	-5.183304e+01
1.389000e+03	5.073454e+03	-2.734470e+01	-4.762184e+01	-3.901430e+01	-1.497055e+02	-5.772819e+01	-4.853190e+01	-7.917942e+01	4.075124e+01	-8.837460e+01	-7.105226e+01	-7.056185e+01	3.204345e+01	-1.017894e+02	-7.917635e+01	-7.053442e+01	-4.678547e+01
1.390000e+03	4.694571e+03	-5.577732e+00	-2.996284e+01	-1.433724e+01	-1.141514e+02	-5.073705e+01	-4.545727e+01	-7.242497e+01	4.566580e+01	-7.562776e+01	-5.890236e+01	-5.679568e+01	4.456699e+01	-7.508177e+01	-7.034623e+01	-4.380853e+01	-3.571799e+01
1.391000e+03	4.400482e+03	3.917345e+01	-2.221502e+00	2.083837e+01	-6.753876e+01	-3.678403e+01	-3.249982e+01	-6.095814e+01	5.596252e+01	-5.818067e+01	-4.131707e+01	-3.790034e+01	6.215418e+01	-4.409936e+01	-5.389509e+01	-1.364540e+01	-1.924548e+01
1.392000e+03	4.187019e+03	1.032856e+02	3.218874e+01	6.304930e+01	-1.221510e+01	-1.800369e+01	-1.025333e+01	-4.624148e+01	7.022589e+01	-3.803151e+01	-2.015873e+01	-1.538763e+01	8.320447e+01	-1.080740e+01	-3.028030e+01	1.806488e+01	1.908825e+00
1.393000e+03	4.042702e+03	1.811179e+02	6.935881e+01	1.083536e+02	4.870254e+01	3.130232e+00	1.963436e+01	-2.997584e+01	8.657501e+01	-1.720875e+01	2.539096e+00	9.009223e+00	1.058098e+02	2.268316e+01	-7.043816e-01	4.940776e+01	2.681425e+01
1.394000e+03	3.953075e+03	2.648836e+02	1.050181e+02	1.523467e+02	1.109243e+02	2.396147e+01	5.430477e+01	-1.402627e+01	1.027300e+02	2.296718e+00	2.458355e+01	3.329127e+01	1.277584e+02	5.402888e+01	3.263965e+01	7.828648e+01	5.414327e+01
1.395000e+03	3.904313e+03	3.450162e+02	1.347713e+02	1.903301e+02	1.689337e+02	4.181416e+01	8.982146e+01	-3.159915e-01	1.162207e+02	1.855971e+01	4.368754e+01	5.523221e+01	1.466389e+02	8.066958e+01	6.656611e+01	1.023702e+02	8.204279e+01
1.396000e+03	3.885396e+03	4.112261e+02	1.545345e+02	2.177691e+02	2.165115e+02	5.421167e+01	1.216818e+02	9.351262e+00	1.247541e+02	2.978936e+01	5.765468e+01	7.257703e+01	1.601128e+02	1.000424e+02	9.725815e+01	1.192566e+02	1.081711e+02
1.397000e+03	3.888647e+03	4.540549e+02	1.610917e+02	2.309438e+02	2.477626e+02	5.913576e+01	1.456052e+02	1.351529e+01	1.266338e+02	3.446617e+01	6.465466e+01	8.336151e+01	1.662901e+02	1.099699e+02	1.209339e+02	1.268326e+02	1.299153e+02
1.398000e+03	3.908734e+03	4.664449e+02	1.525683e+02	2.275404e+02	2.583013e+02	5.525427e+01	1.583424e+02	1.125597e+01	1.210599e+02	3.151555e+01	6.348677e+01	8.622556e+01	1.640573e+02	1.090910e+02	1.346019e+02	1.237040e+02	1.447235e+02
1.399000e+03	3.940642e+03	4.448206e+02	1.286390e+02	2.069398e+02	2.461654e+02	4.204690e+01	1.582311e+02	2.291361e+00	1.081840e+02	2.046083e+01	5.372951e+01	8.059318e+01	1.532167e+02	9.717458e+01	1.366432e+02	1.095278e+02	1.504577e+02
1.400000e+03	3.977486e+03	3.894267e+02	9.042709e+01	1.701350e+02	2.121630e+02	1.981646e+01	1.453372e+02	-1.303934e+01	8.891271e+01	1.518713e+00	3.574223e+01	6.667303e+01	1.344015e+02	7.520641e+01	1.270378e+02	8.513213e+01	1.456963e+02
1.401000e+03	4.009279e+03	3.039994e+02	4.021343e+01	1.194013e+02	1.596058e+02	-1.036498e+01	1.212073e+02	-3.386179e+01	6.458124e+01	-2.436492e+01	1.056563e+01	4.533364e+01	1.088462e+02	4.523936e+01	1.072058e+02	5.240850e+01	1.299572e+02
1.402000e+03	4.023557e+03	1.950353e+02	-1.887502e+01	5.792057e+01	9.359522e+01	-4.671749e+01	8.838608e+01	-5.885583e+01	3.665868e+01	-5.553217e+01	-2.020430e+01	1.795011e+01	7.813692e+01	1.007141e+01	7.956994e+01	1.403572e+01	1.038287e+02
1.403000e+03	4.008041e+03	7.087876e+01	-8.312091e+01	-1.052989e+01	2.010105e+01	-8.682522e+01	4.988102e+01	-8.632533e+01	6.584279e+00	-8.970499e+01	-5.453708e+01	-1.372166e+01	4.402019e+01	-2.716759e+01	4.699988e+01	-2.688636e+01	6.897682e+01
1.404000e+03	3.954456e+03	-5.932749e+01	-1.484890e+02	-8.187762e+01	-5.498688e+01	-1.277960e+02	8.686686e+00	-1.142958e+02	-2.428434e+01	-1.242058e+02	-9.012348e+01	-4.766990e+01	8.259245e+00	-6.346664e+01	1.227560e+01	-6.724820e+01	2.797363e+01
1.405000e+03	3.861916e+03	-1.868811e+02	-2.110578e+02	-1.521788e+02	-1.267341e+02	-1.665987e+02	-3.260232e+01	-1.407192e+02	-5.471325e+01	-1.563470e+02	-1.246332e+02	-8.182454e+01	-2.753249e+01	-9.639075e+01	-2.235187e+01	-1.043667e+02	-1.609138e+01
1.406000e+03	3.738263e+03	-3.049042e+02	-2.676613e+02	-2.182207e+02	-1.918854e+02	-2.005821e+02	-7.209276e+01	-1.638202e+02	-8.371567e+01	-1.839496e+02	-1.560884e+02	-1.143633e+02	-6.212025e+01	-1.244959e+02	-5.546127e+01	-1.364082e+02	-6.017910e+01
1.407000e+03	3.598604e+03	-4.095875e+02	-3.165962e+02	-2.781629e+02	-2.493161e+02	-2.280447e+02	-1.087873e+02	-1.825128e+02	-1.107552e+02	-2.058466e+02	-1.832618e+02	-1.440635e+02	-9.489093e+01	-1.476072e+02	-8.658993e+01	-1.627108e+02	-1.019080e+02
1.408000e+03	3.461539e+03	-5.008349e+02	-3.580863e+02	-3.319258e+02	-3.000556e+02	-2.486274e+02	-1.426135e+02	-1.967251e+02	-1.359228e+02	-2.221707e+02	-2.059339e+02	-1.705497e+02	-1.259845e+02	-1.668404e+02	-1.161572e+02	-1.838847e+02	-1.399963e+02
1.409000e+03	3.344573e+03	-5.819085e+02	-3.942012e+02	-3.810451e+02	-3.467806e+02	-2.633288e+02	-1.742332e+02	-2.074562e+02	-1.599426e+02	-2.342676e+02	-2.248553e+02	-1.942870e+02	-1.561859e+02	-1.842833e+02	-1.451720e+02	-2.015972e+02	-1.743605e+02
1.410000e+03	3.260449e+03	-6.579831e+02	-4.281137e+02	-4.279075e+02	-3.928155e+02	-2.740813e+02	-2.046335e+02	-2.164747e+02	-1.839108e+02	-2.442135e+02	-2.413737e+02	-2.162578e+02	-1.865338e+02	-2.023556e+02	-1.747653e+02	-2.180418e+02	-2.058045e+02
1.411000e+03	3.215437e+03	-7.339367e+02	-4.628472e+02	-4.745434e+02	-4.408514e+02	-2.830051e+02	-2.345801e+02	-2.257109e+02	-2.087921e+02	-2.540670e+02	-2.568200e+02	-2.373992e+02	-2.177273e+02	-2.229887e+02	-2.056411e+02	-2.352051e+02	-2.353862e+02
1.412000e+03	3.209616e+03	-8.120156e+02	-4.998909e+02	-5.213600e+02	-4.917093e+02	-2.915865e+02	-2.640748e+02	-2.365207e+02	-2.348109e+02	-2.650929e+02	-2.718564e+02	-2.579846e+02	-2.495111e+02	-2.468504e+02	-2.375797e+02	-2.541274e+02	-2.636695e+02
1.413000e+03	3.238278e+03	-8.901169e+02	-5.381378e+02	-5.662537e+02	-5.435020e+02	-3.000491e+02	-2.919752e+02	-2.490564e+02	-2.609502e+02	-2.772009e+02	-2.860038e+02	-2.771696e+02	-2.802599e+02	-2.728582e+02	-2.691251e+02	-2.743774e+02	-2.901156e+02
1.414000e+03	3.293459e+03	-9.612895e+02	-5.735291e+02	-6.044465e+02	-5.914770e+02	-3.071180e+02	-3.159119e+02	-2.619616e+02	-2.847671e+02	-2.887753e+02	-2.975153e+02	-2.928782e+02	-3.069426e+02	-2.981577e+02	-2.975670e+02	-2.939129e+02	-3.128265e+02
1.415000e+03	3.365040e+03	-1.014735e+03	-5.995936e+02	-6.291905e+02	-6.286717e+02	-3.102540e+02	-3.325781e+02	-2.725068e+02	-3.026548e+02	-2.969515e+02	-3.036558e+02	-3.021044e+02	-3.255465e+02	-3.186208e+02	-3.192730e+02	-3.094031e+02	-3.287532e+02
1.416000e+03	3.441575e+03	-1.038138e+03	-6.087945e+02	-6.332147e+02	-6.472900e+02	-3.062985e+02	-3.383725e+02	-2.771538e+02	-3.105362e+02	-2.982700e+02	-3.013319e+02	-3.015757e+02	-3.318939e+02	-3.297587e+02	-3.303410e+02	-3.169547e+02	-3.343320e+02
1.417000e+03	3.511359e+03	-1.020698e+03	-5.943150e+02	-6.105216e+02	-6.404651e+02	-2.923419e+02	-3.302518e+02	-2.723882e+02	-3.048034e+02	-2.895218e+02	-2.879004e+02	-2.885969e+02	-3.226306e+02	-3.277951e+02	-3.274285e+02	-3.130431e+02	-3.263710e+02
1.418000e+03	3.564089e+03	-9.558835e+02	-5.517142e+02	-5.579668e+02	-6.038749e+02	-2.665496e+02	-3.065434e+02	-2.555567e+02	-2.831921e+02	-2.685305e+02	-2.619109e+02	-2.618116e+02	-2.960629e+02	-3.105626e+02	-3.085209e+02	-2.953612e+02	-3.029015e+02
1.419000e+03	3.592894e+03	-8.429752e+02	-4.798955e+02	-4.760801e+02	-5.366759e+02	-2.286772e+02	-2.674375e+02	-2.254378e+02	-2.452770e+02	-2.346250e+02	-2.235392e+02	-2.216247e+02	-2.525454e+02	-2.779237e+02	-2.733818e+02	-2.633020e+02	-2.637007e+02
1.420000e+03	3.595994e+03	-6.868778e+02	-3.810998e+02	-3.688633e+02	-4.414586e+02	-1.801165e+02	-2.149753e+02	-1.823828e+02	-1.924304e+02	-1.886740e+02	-1.745733e+02	-1.701481e+02	-1.942916e+02	-2.316000e+02	-2.235293e+02	-2.179379e+02	-2.103148e+02
1.421000e+03	3.577180e+03	-4.964505e+02	-2.600668e+02	-2.427317e+02	-3.233482e+02	-1.235064e+02	-1.525561e+02	-1.280574e+02	-1.273320e+02	-1.327374e+02	-1.179912e+02	-1.107232e+02	-1.247391e+02	-1.745387e+02	-1.617835e+02	-1.615741e+02	-1.456146e+02
1.422000e+03	3.544756e+03	-2.822658e+02	-1.228873e+02	-1.051429e+02	-1.887587e+02	-6.212304e+01	-8.419643e+01	-6.499079e+01	-5.333568e+01	-6.955284e+01	-5.733604e+01	-4.724591e+01	-4.780272e+01	-1.101490e+02	-9.162258e+01	-9.714607e+01	-7.312571e+01
1.423000e+03	3.509232e+03	-5.490250e+01	2.384775e+01	3.645972e+01	-4.442591e+01	6.676812e-01	-1.387427e+01	3.809174e+00	2.597075e+01	-2.123243e+00	3.841098e+00	1.642358e+01	3.262541e+01	-4.176689e+01	-1.666147e+01	-2.777489e+01	3.546373e+00
1.424000e+03	3.480586e+03	1.755388e+02	1.732729e+02	1.750256e+02	1.028927e+02	6.169818e+01	5.479419e+01	7.501705e+01	1.068366e+02	6.643644e+01	6.228330e+01	7.677447e+01	1.127513e+02	2.745991e+01	5.953630e+01	4.334574e+01	8.096597e+01
1.425000e+03	3.465976e+03	3.988184e+02	3.179895e+02	3.036947e+02	2.461249e+02	1.180238e+02	1.185055e+02	1.449662e+02	1.851540e+02	1.328354e+02	1.150630e+02	1.306789e+02	1.886428e+02	9.434314e+01	1.333211e+02	1.127931e+02	1.557781e+02
1.426000e+03	3.468535e+03	6.036556e+02	4.498301e+02	4.154834e+02	3.774668e+02	1.668430e+02	1.740262e+02	2.096362e+02	2.563013e+02	1.935281e+02	1.594961e+02	1.752998e+02	2.559999e+02	1.553672e+02	2.007153e+02	1.767409e+02	2.244801e+02
1.427000e+03	3.487382e+03	7.775297e+02	5.601711e+02	5.033687e+02	4.884104e+02	2.055121e+02	2.180281e+02	2.648592e+02	3.153295e+02	2.448399e+02	1.931254e+02	2.080699e+02	3.102573e+02	2.066578e+02	2.573600e+02	2.310402e+02	2.833348e+02
1.428000e+03	3.518639e+03	9.077438e+02	6.409815e+02	5.610031e+02	5.705270e+02	2.317507e+02	2.472067e+02	3.068157e+02	3.575951e+02	2.833834e+02	2.138788e+02	2.268533e+02	3.471393e+02	2.443590e+02	2.988432e+02	2.716739e+02	3.286133e+02
1.429000e+03	3.557037e+03	9.835673e+02	6.863189e+02	5.838658e+02	6.168726e+02	2.439837e+02	2.587135e+02	3.326901e+02	3.796631e+02	3.066515e+02	2.203675e+02	2.302555e+02	3.635142e+02	2.653312e+02	3.213850e+02	2.954784e+02	3.571526e+02
1.430000e+03	3.597640e+03	9.986618e+02	6.936756e+02	5.703777e+02	6.235210e+02	2.416622e+02	2.507676e+02	3.412273e+02	3.801240e+02	3.135461e+02	2.121908e+02	2.179504e+02	3.582037e+02	2.678987e+02	3.226547e+02	3.008581e+02	3.670278e+02
1.431000e+03	3.637265e+03	9.528337e+02	6.645922e+02	5.224998e+02	5.906254e+02	2.254231e+02	2.232210e+02	3.329495e+02	3.599771e+02	3.046085e+02	1.901113e+02	1.908803e+02	3.324060e+02	2.523446e+02	3.024091e+02	2.882096e+02	3.580616e+02
1.432000e+03	3.675147e+03	8.524578e+02	6.042895e+02	4.455820e+02	5.226095e+02	1.970370e+02	1.778831e+02	3.099424e+02	3.224213e+02	2.818606e+02	1.560412e+02	1.512599e+02	2.895592e+02	2.209655e+02	2.627087e+02	2.598960e+02	3.319675e+02
1.433000e+03	3.712586e+03	7.094808e+02	5.204954e+02	3.475519e+02	4.274509e+02	1.591955e+02	1.185005e+02	2.753140e+02	2.721476e+02	2.483397e+02	1.128666e+02	1.023966e+02	2.347041e+02	1.776820e+02	2.076460e+02	2.198025e+02	2.920806e+02
1.434000e+03	3.751566e+03	5.394330e+02	4.219570e+02	2.377572e+02	3.153567e+02	1.152316e+02	5.040370e+01	2.325650e+02	2.144164e+02	2.075323e+02	6.418688e+01	4.839148e+01	1.735894e+02	1.273616e+02	1.427052e+02	1.726519e+02	2.428005e+02
1.435000e+03	3.792864e+03	3.591386e+02	3.171801e+02	1.258250e+02	1.972940e+02	6.884703e+01	-2.008839e+01	1.851160e+02	1.542500e+02	1.629221e+02	1.403127e+01	-6.213673e+00	1.118125e+02	7.508439e+01	7.398702e+01	1.233102e+02	1.889538e+02
1.436000e+03	3.834467e+03	1.847427e+02	2.137380e+02	2.077461e+01	8.376841e+01	2.386434e+01	-8.638441e+01	1.361291e+02	9.596430e+01	1.177667e+02	-3.342840e+01	-5.681121e+01	5.422097e+01	2.554372e+01	7.517858e+00	7.625637e+01	1.352657e+02
1.437000e+03	3.871190e+03	3.035000e+01	1.181524e+02	-6.956800e+01	-1.599394e+01	-1.602886e+01	-1.423547e+02	8.857918e+01	4.307314e+01	7.507381e+01	-7.419162e+01	-9.912178e+01	4.640129e+00	-1.732749e+01	-5.125244e+01	3.526647e+01	8.601556e+01
1.438000e+03	3.895860e+03	-9.280325e+01	3.604845e+01	-1.389704e+02	-9.455578e+01	-4.758804e+01	-1.830172e+02	4.538942e+01	-1.588050e+00	3.763310e+01	-1.048037e+02	-1.296148e+02	-3.415227e+01	-5.053707e+01	-9.779668e+01	3.250325e+00	4.482303e+01
1.439000e+03	3.901699e+03	-1.769589e+02	-2.782817e+01	-1.831791e+02	-1.466968e+02	-6.839445e+01	-2.051317e+02	9.400220e+00	-3.575688e+01	7.927700e+00	-1.227941e+02	-1.459418e+02	-6.037340e+01	-7.212313e+01	-1.288103e+02	-1.787635e+01	1.443430e+01
1.440000e+03	3.884982e+03	-2.184994e+02	-7.001591e+01	-2.003848e+02	-1.699182e+02	-7.727720e+01	-2.076522e+02	-1.696388e+01	-5.784507e+01	-1.216933e+01	-1.271241e+02	-1.473301e+02	-7.325245e+01	-8.125047e+01	-1.425451e+02	-2.736300e+01	-3.585627e+00
1.441000e+03	3.847006e+03	-2.186746e+02	-8.914589e+01	-1.917052e+02	-1.649798e+02	-7.467658e+01	-1.919574e+02	-3.228159e+01	-6.727674e+01	-2.186522e+01	-1.185329e+02	-1.348445e+02	-7.316781e+01	-7.834258e+01	-1.391469e+02	-2.582354e+01	-9.232934e+00
1.442000e+03	3.794871e+03	-1.840824e+02	-8.682112e+01	-1.614735e+02	-1.362241e+02	-6.280914e+01	-1.617673e+02	-3.674900e+01	-6.491714e+01	-2.189797e+01	-9.964243e+01	-1.114108e+02	-6.183050e+01	-6.519161e+01	-1.208570e+02	-1.535876e+01	-4.362437e+00
1.443000e+03	3.741138e+03	-1.264294e+02	-6.807139e+01	-1.170642e+02	-9.137319e+01	-4.550195e+01	-1.226775e+02	-3.251305e+01	-5.333863e+01	-1.472522e+01	-7.471114e+01	-8.152013e+01	-4.235630e+01	-4.493400e+01	-9.190158e+01	5.357186e-01	7.313083e+00
1.444000e+03	3.702558e+03	-6.118082e+01	-4.096318e+01	-6.805728e+01	-4.059125e+01	-2.763000e+01	-8.131827e+01	-2.348175e+01	-3.668783e+01	-4.266960e+00	-4.900029e+01	-5.059389e+01	-1.906384e+01	-2.178243e+01	-5.795580e+01	1.737095e+01	2.068509e+01
1.445000e+03	3.697861e+03	-5.035879e+00	-1.522629e+01	-2.472763e+01	5.166039e+00	-1.420161e+01	-4.423925e+01	-1.455252e+01	-2.005026e+01	4.832495e+00	-2.782579e+01	-2.407430e+01	3.088207e+00	-4.618571e-01	-2.520536e+01	3.037713e+01	3.018844e+01
1.446000e+03	3.744328e+03	2.740667e+01	-1.319984e-01	3.921167e+00	3.624432e+01	-9.262664e+00	-1.671260e+01	-1.042458e+01	-8.400012e+00	8.275964e+00	-1.547311e+01	-6.392952e+00	1.938178e+01	1.460723e+01	8.263331e-01	3.542329e+01	3.105072e+01
1.447000e+03	3.853180e+03	2.703911e+01	-2.179122e+00	1.214148e+01	4.636406e+01	-1.488731e+01	-1.701096e+00	-1.433603e+01	-5.399803e+00	3.227465e+00	-1.422719e+01	-3.688058e-02	2.635427e+01	2.022979e+01	1.641462e+01	2.995443e+01	2.053817e+01
1.448000e+03	4.024715e+03	-7.262889e+00	-2.329293e+01	-1.105023e+00	3.413676e+01	-3.055051e+01	7.528617e-01	-2.712417e+01	-1.241475e+01	-1.087299e+01	-2.378471e+01	-4.956625e+00	2.266410e+01	1.522778e+01	2.043201e+01	1.370939e+01	-1.173022e+00
1.449000e+03	4.245086e+03	-6.791242e+01	-6.014910e+01	-3.172360e+01	3.552320e+00	-5.311075e+01	-6.480467e+00	-4.692446e+01	-2.807722e+01	-3.206852e+01	-4.125241e+01	-1.851736e+01	9.512830e+00	8.472140e-01	1.456404e+01	-1.100758e+01	-3.081208e+01
1.450000e+03	4.486778e+03	-1.400967e+02	-1.049083e+02	-7.134067e+01	-3.680944e+01	-7.746993e+01	-1.831196e+01	-6.962268e+01	-4.858576e+01	-5.632105e+01	-6.179055e+01	-3.607070e+01	-9.565540e+00	-1.940103e+01	2.839747e+00	-3.964570e+01	-6.265190e+01
1.451000e+03	4.713704e+03	-2.052565e+02	-1.471833e+02	-1.092884e+02	-7.573593e+01	-9.776516e+01	-2.869175e+01	-8.992429e+01	-6.868018e+01	-7.850327e+01	-7.976517e+01	-5.204170e+01	-2.953705e+01	-4.048365e+01	-9.426655e+00	-6.630653e+01	-8.985354e+01
1.452000e+03	4.889862e+03	-2.456355e+02	-1.766280e+02	-1.351643e+02	-1.020164e+02	-1.087569e+02	-3.211445e+01	-1.026976e+02	-8.299351e+01	-9.363593e+01	-9.008981e+01	-6.124251e+01	-4.508585e+01	-5.698565e+01	-1.699013e+01	-8.502415e+01	-1.061498e+02
1.453000e+03	4.988657e+03	-2.485227e+02	-1.853192e+02	-1.411703e+02	-1.069993e+02	-1.069924e+02	-2.493370e+01	-1.041652e+02	-8.734073e+01	-9.798070e+01	-8.934823e+01	-6.002087e+01	-5.183006e+01	-6.431338e+01	-1.591873e+01	-9.107872e+01	-1.073537e+02
1.454000e+03	4.999490e+03	-2.088456e+02	-1.691946e+02	-1.234862e+02	-8.630946e+01	-9.138965e+01	-6.072936e+00	-9.259541e+01	-7.952829e+01	-8.966883e+01	-7.634705e+01	-4.688772e+01	-4.714344e+01	-5.959673e+01	-4.348965e+00	-8.195853e+01	-9.221366e+01
1.455000e+03	4.929382e+03	-1.293298e+02	-1.281870e+02	-8.229092e+01	-4.024071e+01	-6.309218e+01	2.309335e+01	-6.834491e+01	-5.945473e+01	-6.873456e+01	-5.194746e+01	-2.244617e+01	-3.034399e+01	-4.204114e+01	1.745392e+01	-5.769194e+01	-6.235823e+01
1.456000e+03	4.799581e+03	-1.831502e+01	-6.518445e+01	-2.055083e+01	2.720197e+01	-2.470525e+01	5.962519e+01	-3.333613e+01	-2.854271e+01	-3.664337e+01	-1.829166e+01	1.130258e+01	-2.256482e+00	-1.268260e+01	4.768987e+01	-2.048391e+01	-2.140432e+01
1.457000e+03	4.639039e+03	1.138495e+02	1.565477e+01	5.784554e+01	1.101816e+02	2.076084e+01	1.003314e+02	9.779841e+00	1.121719e+01	4.436951e+00	2.223882e+01	5.197693e+01	3.561176e+01	2.630006e+01	8.401028e+01	2.617707e+01	2.640478e+01
1.458000e+03	4.477418e+03	2.584726e+02	1.105543e+02	1.498329e+02	2.031382e+02	7.084337e+01	1.430273e+02	5.847246e+01	5.821641e+01	5.233844e+01	6.791885e+01	9.775736e+01	8.192037e+01	7.244104e+01	1.245253e+02	7.862079e+01	7.752510e+01
1.459000e+03	4.339690e+03	4.110001e+02	2.171842e+02	2.541435e+02	3.024400e+02	1.241660e+02	1.872909e+02	1.109526e+02	1.118236e+02	1.053625e+02	1.181117e+02	1.479169e+02	1.360383e+02	1.237303e+02	1.684906e+02	1.339595e+02	1.299638e+02
1.460000e+03	4.243130e+03	5.716136e+02	3.348896e+02	3.712348e+02	4.071208e+02	1.804537e+02	2.344761e+02	1.664440e+02	1.724470e+02	1.624460e+02	1.731387e+02	2.027922e+02	1.981022e+02	1.790457e+02	2.164719e+02	1.906610e+02	1.834460e+02
1.461000e+03	4.196446e+03	7.440059e+02	4.641741e+02	5.023424e+02	5.185922e+02	2.401299e+02	2.870195e+02	2.251086e+02	2.411029e+02	2.230762e+02	2.337251e+02	2.632772e+02	2.686224e+02	2.382046e+02	2.699698e+02	2.486363e+02	2.389616e+02
1.462000e+03	4.200433e+03	9.330175e+02	6.057796e+02	6.481644e+02	6.395496e+02	3.037462e+02	3.473290e+02	2.877190e+02	3.187089e+02	2.870776e+02	3.003184e+02	3.301011e+02	3.478500e+02	3.016859e+02	3.306648e+02	3.088998e+02	2.979679e+02
1.463000e+03	4.249701e+03	1.142122e+03	7.597938e+02	8.077876e+02	7.725129e+02	3.715143e+02	4.166715e+02	3.552212e+02	4.054068e+02	3.543959e+02	3.725873e+02	4.032096e+02	4.352038e+02	3.701582e+02	3.995578e+02	3.729708e+02	3.616030e+02
1.464000e+03	4.335248e+03	1.371649e+03	9.251262e+02	9.783013e+02	9.184959e+02	4.431117e+02	4.944465e+02	4.283246e+02	5.001757e+02	4.249615e+02	4.492939e+02	4.814922e+02	5.290107e+02	4.439805e+02	4.763013e+02	4.422104e+02	4.301885e+02
1.465000e+03	4.447546e+03	1.618154e+03	1.099448e+03	1.155167e+03	1.076160e+03	5.177542e+02	5.780493e+02	5.071962e+02	6.008366e+02	4.986243e+02	5.285233e+02	5.629065e+02	6.266472e+02	5.228022e+02	5.589245e+02	5.172505e+02	5.031147e+02
1.466000e+03	4.579433e+03	1.874726e+03	1.279361e+03	1.332974e+03	1.241512e+03	5.943461e+02	6.632545e+02	5.912248e+02	7.043259e+02	5.750507e+02	6.080469e+02	6.448278e+02	7.249316e+02	6.052935e+02	6.439643e+02	5.975625e+02	5.789730e+02
1.467000e+03	4.727902e+03	2.131492e+03	1.460346e+03	1.505926e+03	1.407914e+03	6.714290e+02	7.448127e+02	6.787327e+02	8.069406e+02	6.534219e+02	6.854907e+02	7.243021e+02	8.204397e+02	6.889351e+02	7.268107e+02	6.811171e+02	6.556522e+02
1.468000e+03	4.894076e+03	2.375539e+03	1.636071e+03	1.667471e+03	1.566033e+03	7.467285e+02	8.168863e+02	7.665246e+02	9.042608e+02	7.318270e+02	7.580548e+02	7.979151e+02	9.094212e+02	7.697658e+02	8.019898e+02	7.640564e+02	7.301377e+02
1.469000e+03	5.081370e+03	2.590044e+03	1.797131e+03	1.809049e+03	1.703604e+03	8.163596e+02	8.731180e+02	8.493326e+02	9.906937e+02	8.064549e+02	8.218086e+02	8.612403e+02	9.872451e+02	8.420855e+02	8.632183e+02	8.403983e+02	7.979916e+02
1.470000e+03	5.292672e+03	2.753314e+03	1.929910e+03	1.918632e+03	1.805309e+03	8.740913e+02	9.064625e+02	9.194775e+02	1.058958e+03	8.709687e+02	8.709390e+02	9.081897e+02	1.047696e+03	8.983158e+02	9.033447e+02	9.019757e+02	8.528268e+02
1.471000e+03	5.527799e+03	2.839206e+03	2.016704e+03	1.980322e+03	1.853502e+03	9.112807e+02	9.092179e+02	9.672428e+02	1.100103e+03	9.166157e+02	8.975688e+02	9.308519e+02	1.082755e+03	9.293785e+02	9.145573e+02	9.389565e+02	8.863245e+02
1.472000e+03	5.782257e+03	2.820274e+03	2.038110e+03	1.976132e+03	1.830503e+03	9.179800e+02	8.737536e+02	9.823461e+02	1.104613e+03	9.335088e+02	8.926751e+02	9.203597e+02	1.083457e+03	9.259157e+02	8.892864e+02	9.412279e+02	8.892771e+02
1.473000e+03	6.047569e+03	2.673948e+03	1.977727e+03	1.890192e+03	1.722557e+03	8.852657e+02	7.941498e+02	9.564596e+02	1.064678e+03	9.130590e+02	8.481993e+02	8.689174e+02	1.041992e+03	8.803690e+02	8.219464e+02	9.006230e+02	8.537261e+02
1.474000e+03	6.312563e+03	2.390345e+03	1.827967e+03	1.714355e+03	1.524668e+03	8.082112e+02	6.684491e+02	8.861319e+02	9.770481e+02	8.509270e+02	7.598257e+02	7.725132e+02	9.545281e+02	7.894748e+02	7.111674e+02	8.135138e+02	7.756775e+02
1.475000e+03	6.564624e+03	1.979029e+03	1.594813e+03	1.453135e+03	1.244636e+03	6.884494e+02	5.007476e+02	7.750332e+02	8.454030e+02	7.494157e+02	6.294298e+02	6.333509e+02	8.237048e+02	6.563517e+02	5.617156e+02	6.829349e+02	6.574372e+02
1.476000e+03	6.790194e+03	1.471742e+03	1.299329e+03	1.125805e+03	9.045327e+02	5.352312e+02	3.021838e+02	6.344710e+02	6.811017e+02	6.182312e+02	4.661418e+02	4.609448e+02	6.596638e+02	4.912983e+02	3.851845e+02	5.193631e+02	5.085651e+02
1.477000e+03	6.974540e+03	9.193081e+02	9.748006e+02	7.643533e+02	5.384707e+02	3.643480e+02	9.014718e+01	4.816675e+02	5.017389e+02	4.730646e+02	2.854050e+02	2.712204e+02	4.789513e+02	3.107565e+02	1.988638e+02	3.396222e+02	3.448711e+02
1.478000e+03	7.101594e+03	3.829059e+02	6.600434e+02	4.075919e+02	1.868296e+02	1.950687e+02	-1.143710e+02	3.361440e+02	3.277661e+02	3.322802e+02	1.061460e+02	8.369413e+01	3.014511e+02	1.345165e+02	2.283986e+01	1.640047e+02	1.855755e+02
1.479000e+03	7.154901e+03	-7.798743e+01	3.909593e+02	9.316981e+01	-1.116123e+02	4.600319e+01	-2.906712e+02	2.153249e+02	1.782154e+02	2.127476e+02	-5.310467e+01	-8.246215e+01	1.462818e+02	-1.812996e+01	-1.239280e+02	1.232967e+01	4.942598e+01
1.480000e+03	7.120282e+03	-4.174830e+02	1.930812e+02	-1.499652e+02	-3.273726e+02	-6.879609e+01	-4.223849e+02	1.307895e+02	6.689509e+01	1.261910e+02	-1.779243e+02	-2.122544e+02	2.796812e+01	-1.321920e+02	-2.273991e+02	-9.996091e+01	-4.908829e+01
1.481000e+03	6.989839e+03	-6.115876e+02	7.736549e+01	-3.064179e+02	-4.455758e+02	-1.423067e+02	-5.004799e+02	8.633172e+01	1.836686e-01	7.718832e+01	-2.604304e+02	-2.974504e+02	-4.597796e+01	-1.996600e+02	-2.809862e+02	-1.645785e+02	-1.023657e+02
1.482000e+03	6.765917e+03	-6.608396e+02	4.015358e+01	-3.753744e+02	-4.675125e+02	-1.749618e+02	-5.244064e+02	7.826366e+01	-2.311752e+01	6.327909e+01	-2.998398e+02	-3.372651e+02	-7.552571e+01	-2.203797e+02	-2.861665e+02	-1.813363e+02	-1.105458e+02
1.483000e+03	6.463206e+03	-5.871093e+02	6.667386e+01	-3.680911e+02	-4.083503e+02	-1.731641e+02	-5.011877e+02	9.757685e+01	-1.017053e+01	7.685347e+01	-3.012517e+02	-3.371915e+02	-6.683245e+01	-2.010413e+02	-2.511707e+02	-1.571709e+02	-8.055687e+01
1.484000e+03	6.107685e+03	-4.261807e+02	1.363768e+02	-3.032247e+02	-2.920816e+02	-1.466398e+02	-4.429278e+02	1.329995e+02	2.845235e+01	1.079340e+02	-2.733138e+02	-3.066082e+02	-2.990700e+01	-1.527866e+02	-1.883542e+02	-1.037189e+02	-2.383697e+01
1.485000e+03	5.732379e+03	-2.187298e+02	2.281535e+02	-2.017908e+02	-1.454679e+02	-1.056331e+02	-3.636334e+02	1.738755e+02	8.133033e+01	1.468325e+02	-2.256787e+02	-2.560780e+02	2.388797e+01	-8.828241e+01	-1.111675e+02	-3.429165e+01	4.651111e+01
1.486000e+03	5.371353e+03	-2.287732e+00	3.240294e+02	-8.321405e+01	7.273254e+00	-5.878743e+01	-2.763249e+02	2.120962e+02	1.380937e+02	1.859442e+02	-1.670263e+02	-1.951590e+02	8.380821e+01	-1.912612e+01	-3.159281e+01	3.887526e+01	1.183635e+02
1.487000e+03	5.054161e+03	1.940810e+02	4.108463e+02	3.683338e+01	1.478739e+02	-1.212784e+01	-1.911342e+02	2.428283e+02	1.904286e+02	2.204249e+02	-1.040532e+02	-1.311984e+02	1.408786e+02	4.582256e+01	4.141906e+01	1.064645e+02	1.824515e+02
1.488000e+03	4.802646e+03	3.518671e+02	4.802828e+02	1.469201e+02	2.651777e+02	3.090839e+01	-1.146339e+02	2.642341e+02	2.323411e+02	2.479473e+02	-4.139881e+01	-6.914369e+01	1.883075e+02	1.010026e+02	1.024053e+02	1.627821e+02	2.332115e+02
1.489000e+03	4.630751e+03	4.625095e+02	5.279876e+02	2.393189e+02	3.544477e+02	6.876659e+01	-5.020663e+01	2.766147e+02	2.600308e+02	2.679609e+02	1.783052e+01	-1.206979e+01	2.214745e+02	1.438036e+02	1.489877e+02	2.054690e+02	2.686538e+02
1.490000e+03	4.546521e+03	5.252029e+02	5.525745e+02	3.092166e+02	4.156138e+02	1.008609e+02	1.004113e+00	2.814052e+02	2.716983e+02	2.808790e+02	7.137872e+01	3.803119e+01	2.378223e+02	1.737214e+02	1.810216e+02	2.345996e+02	2.895252e+02
1.491000e+03	4.554531e+03	5.442633e+02	5.549076e+02	3.542134e+02	4.512865e+02	1.268178e+02	3.905502e+01	2.803123e+02	2.674521e+02	2.874574e+02	1.173493e+02	7.960196e+01	2.368474e+02	1.914498e+02	1.996934e+02	2.515982e+02	2.981544e+02
1.492000e+03	4.657010e+03	5.268393e+02	5.377292e+02	3.742575e+02	4.651347e+02	1.460561e+02	6.442941e+01	2.747320e+02	2.492819e+02	2.884487e+02	1.540633e+02	1.112442e+02	2.201771e+02	1.982045e+02	2.068202e+02	2.583169e+02	2.973669e+02
1.493000e+03	4.852764e+03	4.812593e+02	5.054144e+02	3.717835e+02	4.608842e+02	1.577005e+02	7.765272e+01	2.654693e+02	2.209348e+02	2.844809e+02	1.802174e+02	1.318220e+02	1.915488e+02	1.953816e+02	2.044307e+02	2.564530e+02	2.897452e+02
1.494000e+03	5.134215e+03	4.158958e+02	4.635614e+02	3.516222e+02	4.418725e+02	1.607176e+02	7.921472e+01	2.527260e+02	1.875049e+02	2.760579e+02	1.951569e+02	1.407701e+02	1.564480e+02	1.844652e+02	1.945523e+02	2.473171e+02	2.773284e+02
1.495000e+03	5.483955e+03	3.382371e+02	4.182155e+02	3.203019e+02	4.108927e+02	1.541298e+02	6.960763e+01	2.362787e+02	1.546367e+02	2.635805e+02	1.990403e+02	1.383481e+02	1.212445e+02	1.670030e+02	1.790556e+02	2.318321e+02	2.616581e+02
1.496000e+03	5.872712e+03	2.539405e+02	3.747315e+02	2.846408e+02	3.700300e+02	1.372050e+02	4.931004e+01	2.157420e+02	1.274107e+02	2.473226e+02	1.927473e+02	1.256343e+02	9.187686e+01	1.444735e+02	1.594252e+02	2.105990e+02	2.439519e+02
1.497000e+03	6.260497e+03	1.659050e+02	3.365064e+02	2.499183e+02	3.203505e+02	1.095816e+02	1.866933e+01	1.908078e+02	1.091546e+02	2.273536e+02	1.775231e+02	1.042030e+02	7.237917e+01	1.179919e+02	1.364395e+02	1.839055e+02	2.251837e+02
1.498000e+03	6.601803e+03	7.367820e+01	3.039744e+02	2.182262e+02	2.615638e+02	7.134472e+01	-2.221839e+01	1.613782e+02	1.005256e+02	2.034502e+02	1.545053e+02	7.561402e+01	6.370584e+01	8.796224e+01	1.098862e+02	1.516735e+02	2.059640e+02
1.499000e+03	6.854353e+03	-2.639265e+01	2.742494e+02	1.876601e+02	1.919797e+02	2.307572e+01	-7.345878e+01	1.275619e+02	9.918638e+01	1.750638e+02	1.243518e+02	4.095789e+01	6.329439e+01	5.390273e+01	7.852956e+01	1.134480e+02	1.862742e+02
1.500000e+03	6.989378e+03	-1.400485e+02	2.416182e+02	1.527551e+02	1.090632e+02	-3.413494e+01	-1.350279e+02	8.955607e+01	1.002299e+02	1.413879e+02	8.715480e+01	6.798549e-01	6.558752e+01	1.464433e+01	4.049640e+01	6.856709e+01	1.652329e+02
1.501000e+03	7.000318e+03	-2.732328e+02	1.987834e+02	1.060985e+02	1.060422e+01	-9.875137e+01	-2.062155e+02	4.746135e+01	9.726920e+01	1.015126e+02	4.268518e+01	-4.523512e+01	6.340152e+01	-3.107252e+01	-5.949076e+00	1.655583e+01	1.410769e+02
1.502000e+03	6.906823e+03	-4.299980e+02	1.385048e+02	4.059507e+01	-1.038769e+02	-1.689557e+02	-2.850764e+02	1.104801e+00	8.389263e+01	5.460913e+01	-9.143337e+00	-9.681515e+01	4.972736e+01	-8.381137e+01	-6.150814e+01	-4.236455e+01	1.114476e+02
1.503000e+03	6.752099e+03	-6.108704e+02	5.520447e+01	-4.835282e+01	-2.320997e+02	-2.428566e+02	-3.681794e+02	-5.003464e+01	5.509665e+01	1.035103e-01	-6.778866e+01	-1.536013e+02	1.942517e+01	-1.428126e+02	-1.252151e+02	-1.068794e+02	7.394574e+01
1.504000e+03	6.593809e+03	-8.120912e+02	-5.376661e+01	-1.613703e+02	-3.688621e+02	-3.186063e+02	-4.508345e+02	-1.066816e+02	8.366679e+00	-6.213862e+01	-1.317507e+02	-2.142943e+02	-2.963009e+01	-2.058159e+02	-1.943623e+02	-1.744945e+02	2.682298e+01
1.505000e+03	6.490928e+03	-1.025735e+03	-1.873029e+02	-2.946208e+02	-5.068091e+02	-3.942914e+02	-5.277542e+02	-1.693205e+02	-5.576681e+01	-1.315420e+02	-1.984796e+02	-2.766474e+02	-9.615172e+01	-2.693927e+02	-2.650001e+02	-2.418044e+02	-3.034384e+01
1.506000e+03	6.490370e+03	-1.240422e+03	-3.401609e+02	-4.402508e+02	-6.377174e+02	-4.676029e+02	-5.939049e+02	-2.374994e+02	-1.337238e+02	-2.064432e+02	-2.645128e+02	-3.375986e+02	-1.757484e+02	-3.295874e+02	-3.327404e+02	-3.049738e+02	-9.613849e+01
1.507000e+03	6.617167e+03	-1.442382e+03	-5.031019e+02	-5.875568e+02	-7.536864e+02	-5.355052e+02	-6.452568e+02	-3.091258e+02	-2.193778e+02	-2.837298e+02	-3.258060e+02	-3.935903e+02	-2.617610e+02	-3.825530e+02	-3.934768e+02	-3.602083e+02	-1.670766e+02
1.508000e+03	6.870677e+03	-1.616910e+03	-6.637891e+02	-7.246816e+02	-8.478186e+02	-5.942735e+02	-6.792515e+02	-3.801452e+02	-3.050165e+02	-3.587776e+02	-3.782455e+02	-4.410473e+02	-3.464457e+02	-4.249522e+02	-4.437510e+02	-4.040684e+02	-2.377767e+02
1.509000e+03	7.227201e+03	-1.750401e+03	-8.086500e+02	-8.406796e+02	-9.144091e+02	-6.401839e+02	-6.949866e+02	-4.449565e+02	-3.826820e+02	-4.259719e+02	-4.183371e+02	-4.769956e+02	-4.223513e+02	-4.541147e+02	-4.807702e+02	-4.336420e+02	-3.016049e+02
1.510000e+03	7.647455e+03	-1.832977e+03	-9.255775e+02	-9.276907e+02	-9.490148e+02	-6.707998e+02	-6.932341e+02	-4.976367e+02	-4.457086e+02	-4.798717e+02	-4.439961e+02	-4.997588e+02	-4.837024e+02	-4.681215e+02	-5.023017e+02	-4.467185e+02	-3.517548e+02
1.511000e+03	8.086114e+03	-1.861139e+03	-1.006799e+03	-9.827192e+02	-9.487937e+02	-6.863538e+02	-6.763747e+02	-5.336220e+02	-4.901016e+02	-5.166996e+02	-4.552249e+02	-5.095499e+02	-5.275012e+02	-4.659919e+02	-5.067162e+02	-4.420854e+02	-3.825622e+02
1.512000e+03	8.500429e+03	-1.839346e+03	-1.050825e+03	-1.008325e+03	-9.131970e+02	-6.904433e+02	-6.482007e+02	-5.511584e+02	-5.152965e+02	-5.355299e+02	-4.543513e+02	-5.086651e+02	-5.539800e+02	-4.479981e+02	-4.932831e+02	-4.199242e+02	-3.907024e+02
1.513000e+03	8.855672e+03	-1.779419e+03	-1.062459e+03	-1.011658e+03	-8.447096e+02	-6.893810e+02	-6.134450e+02	-5.518130e+02	-5.239222e+02	-5.385384e+02	-4.455432e+02	-5.010164e+02	-5.661203e+02	-4.159387e+02	-4.625981e+02	-3.821240e+02	-3.758929e+02
1.514000e+03	9.126566e+03	-1.697350e+03	-1.050549e+03	-1.001801e+03	-7.491570e+02	-6.900928e+02	-5.769448e+02	-5.397005e+02	-5.205152e+02	-5.300357e+02	-4.335582e+02	-4.909550e+02	-5.682480e+02	-3.731296e+02	-4.168834e+02	-3.322878e+02	-3.408601e+02
1.515000e+03	9.295401e+03	-1.608355e+03	-1.024174e+03	-9.861860e+02	-6.352511e+02	-6.972094e+02	-5.425635e+02	-5.196782e+02	-5.095809e+02	-5.145957e+02	-4.220673e+02	-4.816909e+02	-5.641239e+02	-3.239835e+02	-3.599455e+02	-2.753208e+02	-2.905950e+02
1.516000e+03	9.348752e+03	-1.522006e+03	-9.888297e+02	-9.674554e+02	-5.134184e+02	-7.105615e+02	-5.122284e+02	-4.952922e+02	-4.937476e+02	-4.950856e+02	-4.121958e+02	-4.739168e+02	-5.552648e+02	-2.732654e+02	-2.967483e+02	-2.166854e+02	-2.311809e+02
1.517000e+03	9.275140e+03	-1.439546e+03	-9.443231e+02	-9.421956e+02	-3.942684e+02	-7.243216e+02	-4.855279e+02	-4.674243e+02	-4.727988e+02	-4.715289e+02	-4.019623e+02	-4.652940e+02	-5.402387e+02	-2.252818e+02	-2.327315e+02	-1.615514e+02	-1.686007e+02
1.518000e+03	9.065336e+03	-1.354650e+03	-8.854066e+02	-9.022878e+02	-2.871474e+02	-7.284301e+02	-4.601356e+02	-4.342837e+02	-4.440351e+02	-4.413772e+02	-3.869757e+02	-4.511608e+02	-5.153178e+02	-1.832772e+02	-1.730794e+02	-1.140809e+02	-1.078678e+02
1.519000e+03	8.715579e+03	-1.257344e+03	-8.049335e+02	-8.384785e+02	-1.990703e+02	-7.119547e+02	-4.329574e+02	-3.927543e+02	-4.038399e+02	-4.011001e+02	-3.622023e+02	-4.262947e+02	-4.762823e+02	-1.491753e+02	-1.221001e+02	-7.698085e+01	-5.262547e+01
1.520000e+03	8.232299e+03	-1.139344e+03	-6.981355e+02	-7.447299e+02	-1.341052e+02	-6.671232e+02	-4.015407e+02	-3.404608e+02	-3.497741e+02	-3.483687e+02	-3.241053e+02	-3.870506e+02	-4.206309e+02	-1.236244e+02	-8.278408e+01	-5.132948e+01	-5.149352e+00
1.521000e+03	7.635937e+03	-9.984564e+02	-5.661024e+02	-6.215098e+02	-9.315915e+01	-5.924100e+02	-3.651355e+02	-2.775891e+02	-2.822873e+02	-2.838228e+02	-2.722687e+02	-3.329921e+02	-3.492476e+02	-1.062056e+02	-5.654687e+01	-3.661844e+01	3.343369e+01
1.522000e+03	6.961561e+03	-8.402075e+02	-4.169376e+02	-4.766455e+02	-7.411107e+01	-4.934481e+02	-3.249649e+02	-2.076410e+02	-2.053120e+02	-2.116336e+02	-2.098415e+02	-2.673448e+02	-2.668104e+02	-9.567221e+01	-4.314960e+01	-3.096584e+01	6.289069e+01
1.523000e+03	6.255324e+03	-6.762333e+02	-2.641506e+02	-3.234547e+02	-7.229471e+01	-3.814727e+02	-2.836380e+02	-1.368220e+02	-1.255163e+02	-1.386424e+02	-1.426710e+02	-1.961224e+02	-1.807897e+02	-9.017936e+01	-4.080739e+01	-3.149039e+01	8.368727e+01
1.524000e+03	5.567550e+03	-5.203941e+02	-1.230500e+02	-1.770229e+02	-8.132949e+01	-2.700242e+02	-2.440306e+02	-7.237085e+01	-5.056801e+01	-7.248997e+01	-7.754732e+01	-1.263401e+02	-9.948075e+01	-8.752811e+01	-4.649640e+01	-3.483538e+01	9.685225e+01
1.525000e+03	4.944625e+03	-3.844365e+02	-6.651926e+00	-5.017785e+01	-9.421572e+01	-1.712556e+02	-2.081679e+02	-2.054794e+01	1.286685e+01	-1.952634e+01	-2.030708e+01	-6.407019e+01	-2.987482e+01	-8.546043e+01	-5.643909e+01	-3.777867e+01	1.038487e+02
1.526000e+03	4.422166e+03	-2.749463e+02	7.737422e+01	4.935104e+01	-1.045003e+02	-9.316846e+01	-1.765898e+02	1.495220e+01	6.064551e+01	1.672190e+01	2.549279e+01	-1.306743e+01	2.385537e+01	-8.199326e+01	-6.670013e+01	-3.780247e+01	1.063981e+02
1.527000e+03	4.021200e+03	-1.925339e+02	1.278162e+02	1.197707e+02	-1.072705e+02	-3.854521e+01	-1.484167e+02	3.367355e+01	9.173217e+01	3.607824e+01	5.894902e+01	2.563125e+01	6.081985e+01	-7.572757e+01	-7.379407e+01	-3.347960e+01	1.062398e+02
1.528000e+03	3.747761e+03	-1.331512e+02	1.490395e+02	1.641351e+02	-9.978280e+01	-5.586435e+00	-1.220154e+02	3.807384e+01	1.078088e+02	4.122628e+01	8.128179e+01	5.317183e+01	8.285215e+01	-6.605024e+01	-7.520360e+01	-2.458382e+01	1.048552e+02
1.529000e+03	3.595134e+03	-9.064107e+01	1.487716e+02	1.881021e+02	-8.164810e+01	1.033697e+01	-9.592600e+01	3.247065e+01	1.122331e+02	3.653528e+01	9.478386e+01	7.180258e+01	9.331739e+01	-5.317448e+01	-6.972870e+01	-1.192592e+01	1.032251e+02
1.530000e+03	3.547393e+03	-5.933850e+01	1.355059e+02	1.975763e+02	-5.460707e+01	1.465156e+01	-6.963871e+01	2.170032e+01	1.088265e+02	2.667757e+01	1.017523e+02	8.377076e+01	9.582286e+01	-3.801404e+01	-5.761372e+01	2.997923e+00	1.017011e+02
1.531000e+03	3.583017e+03	-3.574831e+01	1.163913e+02	1.970947e+02	-2.198933e+01	1.198898e+01	-4.390497e+01	9.919956e+00	1.009199e+02	1.547072e+01	1.038083e+02	9.062183e+01	9.328459e+01	-2.192996e+01	-4.042419e+01	1.842394e+01	1.000515e+02
1.532000e+03	3.677904e+03	-1.885008e+01	9.611519e+01	1.893490e+02	1.203964e+01	5.420949e+00	-2.047442e+01	-1.527703e-01	9.089399e+01	5.221201e+00	1.017719e+02	9.307816e+01	8.757432e+01	-6.410073e+00	-2.067498e+01	3.270191e+01	9.768144e+01
1.533000e+03	3.807745e+03	-9.179086e+00	7.685631e+01	1.757071e+02	4.333440e+01	-3.473738e+00	-1.386731e+00	-7.451540e+00	8.020430e+01	-3.347637e+00	9.599771e+01	9.139517e+01	7.970544e+01	7.253844e+00	-1.261201e+00	4.458186e+01	9.395991e+01
1.534000e+03	3.950047e+03	-7.308427e+00	5.901792e+01	1.572074e+02	6.858909e+01	-1.400335e+01	1.186776e+01	-1.228740e+01	6.969843e+01	-1.068017e+01	8.689025e+01	8.589698e+01	7.031189e+01	1.822711e+01	1.519069e+01	5.338471e+01	8.852466e+01
1.535000e+03	4.086059e+03	-1.255308e+01	4.224305e+01	1.353777e+02	8.594067e+01	-2.564854e+01	1.894655e+01	-1.577646e+01	5.995808e+01	-1.771493e+01	7.527474e+01	7.735194e+01	6.009612e+01	2.627174e+01	2.688027e+01	5.904799e+01	8.143916e+01
1.536000e+03	4.202554e+03	-2.255613e+01	2.622272e+01	1.124075e+02	9.518066e+01	-3.761994e+01	2.074319e+01	-1.920898e+01	5.145707e+01	-2.523456e+01	6.240535e+01	6.696843e+01	4.999378e+01	3.172326e+01	3.312905e+01	6.204159e+01	7.313117e+01
1.537000e+03	4.293111e+03	-3.395520e+01	1.100624e+01	9.059618e+01	9.749207e+01	-4.886757e+01	1.892676e+01	-2.356774e+01	4.447903e+01	-3.347317e+01	4.960092e+01	5.601347e+01	4.098532e+01	3.530418e+01	3.432198e+01	6.316332e+01	6.414539e+01
1.538000e+03	4.358437e+03	-4.376938e+01	-3.176854e+00	7.140773e+01	9.479228e+01	-5.845882e+01	1.515218e+01	-2.930454e+01	3.890331e+01	-4.208039e+01	3.770575e+01	4.526970e+01	3.369060e+01	3.782769e+01	3.153175e+01	6.325745e+01	5.483505e+01
1.539000e+03	4.405459e+03	-5.078178e+01	-1.632452e+01	5.469056e+01	8.891541e+01	-6.604610e+01	1.031228e+01	-3.636216e+01	3.405241e+01	-5.037658e+01	2.667523e+01	3.464078e+01	2.800280e+01	3.988639e+01	2.598317e+01	6.293276e+01	4.515257e+01
1.540000e+03	4.445343e+03	-5.622246e+01	-2.897114e+01	3.852489e+01	8.092103e+01	-7.211605e+01	4.165993e+00	-4.434456e+01	2.875063e+01	-5.772045e+01	1.552358e+01	2.313753e+01	2.298804e+01	4.162317e+01	1.856315e+01	6.236147e+01	3.465255e+01
1.541000e+03	4.490977e+03	-6.346013e+01	-4.220059e+01	1.980857e+01	7.073915e+01	-7.786052e+01	-4.526076e+00	-5.272265e+01	2.160107e+01	-6.379909e+01	2.678296e+00	9.270895e+00	1.711674e+01	4.264134e+01	9.537014e+00	6.120785e+01	2.271334e+01
1.542000e+03	4.554644e+03	-7.693544e+01	-5.739500e+01	-4.709458e+00	5.720691e+01	-8.474112e+01	-1.747731e+01	-6.100733e+01	1.134419e+01	-6.873528e+01	-1.342791e+01	-8.338766e+00	8.705073e+00	4.205456e+01	-1.469779e+00	5.868332e+01	8.872260e+00
1.543000e+03	4.646423e+03	-1.008997e+02	-7.591459e+01	-3.745053e+01	3.841362e+01	-9.399060e+01	-3.623573e+01	-6.887700e+01	-2.886440e+00	-7.302306e+01	-3.380812e+01	-3.043084e+01	-3.655307e+00	3.863685e+01	-1.526655e+01	5.368633e+01	-6.887338e+00
1.544000e+03	4.773360e+03	-1.384900e+02	-9.890083e+01	-7.949496e+01	1.221035e+01	-1.063061e+02	-6.169415e+01	-7.627195e+01	-2.151528e+01	-7.737964e+01	-5.864804e+01	-5.688443e+01	-2.085917e+01	3.102618e+01	-3.276620e+01	4.498078e+01	-2.403438e+01
1.545000e+03	4.938911e+03	-1.913544e+02	-1.272511e+02	-1.306397e+02	-2.324533e+01	-1.218473e+02	-9.387550e+01	-8.345273e+01	-4.463931e+01	-8.260556e+01	-8.737368e+01	-8.685972e+01	-4.327762e+01	1.795131e+01	-5.463239e+01	3.138795e+01	-4.162336e+01
1.546000e+03	5.141930e+03	-2.596762e+02	-1.616485e+02	-1.898008e+02	-6.899822e+01	-1.404574e+02	-1.319564e+02	-9.099119e+01	-7.215048e+01	-8.949208e+01	-1.189444e+02	-1.191613e+02	-7.086734e+01	-1.532452e+00	-8.098996e+01	1.198802e+01	-5.860831e+01
1.547000e+03	5.374825e+03	-3.422703e+02	-2.024669e+02	-2.553845e+02	-1.249159e+02	-1.618970e+02	-1.744016e+02	-9.965530e+01	-1.037093e+02	-9.875231e+01	-1.521624e+02	-1.525900e+02	-1.032325e+02	-2.781191e+01	-1.112559e+02	-1.366931e+01	-7.420739e+01
1.548000e+03	5.621426e+03	-4.364992e+02	-2.494448e+02	-3.253423e+02	-1.894612e+02	-1.858994e+02	-2.190948e+02	-1.101765e+02	-1.385201e+02	-1.109206e+02	-1.858240e+02	-1.860900e+02	-1.395281e+02	-6.051413e+01	-1.441151e+02	-4.536134e+01	-8.816273e+01
1.549000e+03	5.856069e+03	-5.380021e+02	-3.011863e+02	-3.968759e+02	-2.596357e+02	-2.119893e+02	-2.634348e+02	-1.229359e+02	-1.750041e+02	-1.261792e+02	-2.186629e+02	-2.186406e+02	-1.782224e+02	-9.837115e+01	-1.776241e+02	-8.203272e+01	-1.007689e+02
1.550000e+03	6.045763e+03	-6.404882e+02	-3.546989e+02	-4.660302e+02	-3.310983e+02	-2.391842e+02	-3.044524e+02	-1.376530e+02	-2.105706e+02	-1.441264e+02	-2.491770e+02	-2.489986e+02	-2.168623e+02	-1.391951e+02	-2.093941e+02	-1.217302e+02	-1.126190e+02
1.551000e+03	6.156496e+03	-7.359771e+02	-4.052542e+02	-5.275560e+02	-3.984629e+02	-2.658111e+02	-3.390522e+02	-1.531814e+02	-2.416884e+02	-1.635649e+02	-2.755172e+02	-2.754969e+02	-2.520478e+02	-1.800080e+02	-2.368057e+02	-1.616867e+02	-1.241308e+02
1.552000e+03	6.162885e+03	-8.158142e+02	-4.468095e+02	-5.753796e+02	-4.558240e+02	-2.896531e+02	-3.644660e+02	-1.675164e+02	-2.643671e+02	-1.824424e+02	-2.956071e+02	-2.960999e+02	-2.797816e+02	-2.173625e+02	-2.572550e+02	-1.985999e+02	-1.350300e+02
1.553000e+03	6.058347e+03	-8.725402e+02	-4.730687e+02	-6.037861e+02	-4.975842e+02	-3.085028e+02	-3.789276e+02	-1.780750e+02	-2.750032e+02	-1.980662e+02	-3.075649e+02	-3.088057e+02	-2.962307e+02	-2.478654e+02	-2.684906e+02	-2.291236e+02	-1.440435e+02
1.554000e+03	5.861864e+03	-9.023167e+02	-4.790302e+02	-6.090987e+02	-5.196099e+02	-3.209906e+02	-3.824612e+02	-1.822404e+02	-2.713913e+02	-2.076403e+02	-3.103495e+02	-3.123224e+02	-2.987597e+02	-2.688582e+02	-2.691106e+02	-2.505264e+02	-1.490182e+02
1.555000e+03	5.618101e+03	-9.072209e+02	-4.626366e+02	-5.913457e+02	-5.205737e+02	-3.273807e+02	-3.775460e+02	-1.780651e+02	-2.536020e+02	-2.090370e+02	-3.044151e+02	-3.067880e+02	-2.869426e+02	-2.791271e+02	-2.592019e+02	-2.613942e+02	-1.475309e+02
1.556000e+03	5.389830e+03	-8.964917e+02	-4.259977e+02	-5.552764e+02	-5.031058e+02	-3.299739e+02	-3.693414e+02	-1.649399e+02	-2.244234e+02	-2.015781e+02	-2.920942e+02	-2.942329e+02	-2.631964e+02	-2.794414e+02	-2.409449e+02	-2.621773e+02	-1.378320e+02
1.557000e+03	5.244459e+03	-8.858870e+02	-3.756846e+02	-5.101896e+02	-4.742122e+02	-3.328563e+02	-3.651834e+02	-1.440015e+02	-1.891551e+02	-1.865350e+02	-2.774706e+02	-2.785214e+02	-2.327362e+02	-2.726945e+02	-2.188614e+02	-2.553607e+02	-1.197659e+02
1.558000e+03	5.238491e+03	-8.947646e+02	-3.218075e+02	-4.683624e+02	-4.444748e+02	-3.409559e+02	-3.732300e+02	-1.180959e+02	-1.547106e+02	-1.671044e+02	-2.656548e+02	-2.646664e+02	-2.027281e+02	-2.634848e+02	-1.993775e+02	-2.451005e+02	-9.526164e+01
1.559000e+03	5.404228e+03	-9.412398e+02	-2.759467e+02	-4.423147e+02	-4.258787e+02	-3.586314e+02	-4.004182e+02	-9.124271e+01	-1.281820e+02	-1.477742e+02	-2.615807e+02	-2.576274e+02	-1.807583e+02	-2.571252e+02	-1.895598e+02	-2.363159e+02	-6.810719e+01
1.560000e+03	5.741928e+03	-1.036562e+03	-2.483960e+02	-4.415739e+02	-4.286298e+02	-3.882066e+02	-4.502117e+02	-6.770723e+01	-1.151963e+02	-1.332108e+02	-2.686301e+02	-2.609032e+02	-1.729718e+02	-2.582627e+02	-1.952145e+02	-2.334070e+02	-4.299217e+01
1.561000e+03	6.218803e+03	-1.180390e+03	-2.454593e+02	-4.698614e+02	-4.578360e+02	-4.289202e+02	-5.208321e+02	-5.092916e+01	-1.184933e+02	-1.269779e+02	-2.875041e+02	-2.753513e+02	-1.823888e+02	-2.694659e+02	-2.188884e+02	-2.389352e+02	-2.410411e+01
1.562000e+03	6.774461e+03	-1.358680e+03	-2.676176e+02	-5.236102e+02	-5.111791e+02	-4.766609e+02	-6.046659e+02	-4.263017e+01	-1.371455e+02	-1.304838e+02	-3.157278e+02	-2.986453e+02	-2.079166e+02	-2.902189e+02	-2.584873e+02	-2.526767e+02	-1.376839e+01
1.563000e+03	7.331345e+03	-1.545296e+03	-3.091936e+02	-5.923978e+02	-5.785613e+02	-5.246412e+02	-6.892718e+02	-4.239390e+01	-1.666951e+02	-1.425091e+02	-3.480220e+02	-3.256233e+02	-2.444116e+02	-3.167079e+02	-3.071382e+02	-2.714068e+02	-1.164532e+01
1.564000e+03	7.808215e+03	-1.707360e+03	-3.597193e+02	-6.613172e+02	-6.441443e+02	-5.648860e+02	-7.599284e+02	-4.788339e+01	-2.002240e+02	-1.595038e+02	-3.775106e+02	-3.495091e+02	-2.838429e+02	-3.425779e+02	-3.545447e+02	-2.895838e+02	-1.481853e+01
1.565000e+03	8.134510e+03	-1.813062e+03	-4.066636e+02	-7.146712e+02	-6.903776e+02	-5.901595e+02	-8.031171e+02	-5.565684e+01	-2.300734e+02	-1.765959e+02	-3.974585e+02	-3.636942e+02	-3.172478e+02	-3.605305e+02	-3.895521e+02	-3.008115e+02	-1.878763e+01
1.566000e+03	8.263188e+03	-1.839669e+03	-4.386994e+02	-7.398935e+02	-7.028353e+02	-5.957896e+02	-8.099397e+02	-6.232449e+01	-2.496901e+02	-1.890117e+02	-4.030320e+02	-3.635494e+02	-3.368940e+02	-3.643158e+02	-4.031603e+02	-2.996640e+02	-1.903403e+01
1.567000e+03	8.179626e+03	-1.779243e+03	-4.484677e+02	-7.304860e+02	-6.742922e+02	-5.808489e+02	-7.784102e+02	-6.564361e+01	-2.550214e+02	-1.934454e+02	-3.925340e+02	-3.476927e+02	-3.379807e+02	-3.504868e+02	-3.910053e+02	-2.832797e+02	-1.259834e+01
1.568000e+03	7.904540e+03	-1.640263e+03	-4.339735e+02	-6.870947e+02	-6.066709e+02	-5.483397e+02	-7.139033e+02	-6.515763e+01	-2.450437e+02	-1.889257e+02	-3.677310e+02	-3.183082e+02	-3.193878e+02	-3.193341e+02	-3.544879e+02	-2.521800e+02	9.048302e-01
1.569000e+03	7.490172e+03	-1.444802e+03	-3.982766e+02	-6.165276e+02	-5.102638e+02	-5.043626e+02	-6.276720e+02	-6.216763e+01	-2.213524e+02	-1.769172e+02	-3.332037e+02	-2.804455e+02	-2.833430e+02	-2.747071e+02	-3.002254e+02	-2.100395e+02	1.918840e+01
1.570000e+03	7.010577e+03	-1.222470e+03	-3.478019e+02	-5.292605e+02	-4.006513e+02	-4.565928e+02	-5.340108e+02	-5.910591e+01	-1.871012e+02	-1.606915e+02	-2.949951e+02	-2.405879e+02	-2.342797e+02	-2.228473e+02	-2.381085e+02	-1.625476e+02	3.809976e+01
1.571000e+03	6.548409e+03	-1.003367e+03	-2.900854e+02	-4.364580e+02	-2.945446e+02	-4.125904e+02	-4.470445e+02	-5.862045e+01	-1.458075e+02	-1.442669e+02	-2.590524e+02	-2.050128e+02	-1.774156e+02	-1.707192e+02	-1.787203e+02	-1.158318e+02	5.297595e+01
1.572000e+03	6.181134e+03	-8.123035e+02	-2.318521e+02	-3.475517e+02	-2.060183e+02	-3.784366e+02	-3.781024e+02	-6.275105e+01	-1.005154e+02	-1.313245e+02	-2.299643e+02	-1.784665e+02	-1.175939e+02	-1.244427e+02	-1.309900e+02	-7.503773e+01	6.001697e+01
1.573000e+03	5.969166e+03	-6.656250e+02	-1.780055e+02	-2.690032e+02	-1.441996e+02	-3.579471e+02	-3.342371e+02	-7.246094e+01	-5.356834e+01	-1.244243e+02	-2.102960e+02	-1.634710e+02	-5.871132e+01	-8.828903e+01	-1.007144e+02	-4.349527e+01	5.721061e+01
1.574000e+03	5.947384e+03	-5.707454e+02	-1.315862e+02	-2.042871e+02	-1.127155e+02	-3.524378e+02	-3.179203e+02	-8.757586e+01	-6.921817e+00	-1.246513e+02	-2.005492e+02	-1.602862e+02	-3.740570e+00	-6.438353e+01	-9.013428e+01	-2.259078e+01	4.458464e+01
1.575000e+03	6.120530e+03	-5.274981e+02	-9.434612e+01	-1.546624e+02	-1.104987e+02	-3.608610e+02	-3.275575e+02	-1.070112e+02	3.731730e+01	-1.316504e+02	-1.995629e+02	-1.673349e+02	4.489849e+01	-5.296158e+01	-9.834758e+01	-1.215894e+01	2.384460e+01
1.576000e+03	6.462666e+03	-5.301719e+02	-6.743910e+01	-1.201515e+02	-1.332144e+02	-3.801549e+02	-3.583763e+02	-1.291187e+02	7.649845e+01	-1.439250e+02	-2.051105e+02	-1.818370e+02	8.495695e+01	-5.288285e+01	-1.221471e+02	-1.107230e+01	-2.350325e+00
1.577000e+03	6.920896e+03	-5.694310e+02	-5.184999e+01	-1.002786e+02	-1.746701e+02	-4.057678e+02	-4.034051e+02	-1.520318e+02	1.074447e+02	-1.592829e+02	-2.145068e+02	-2.004656e+02	1.142254e+02	-6.214832e+01	-1.569207e+02	-1.775091e+01	-3.116953e+01
1.578000e+03	7.423588e+03	-6.338680e+02	-4.841314e+01	-9.438351e+01	-2.278972e+02	-4.323865e+02	-4.544786e+02	-1.739577e+02	1.269354e+02	-1.753378e+02	-2.251332e+02	-2.199330e+02	1.307461e+02	-7.830004e+01	-1.974300e+02	-3.046487e+01	-6.021159e+01
1.579000e+03	7.892610e+03	-7.113148e+02	-5.747983e+01	-1.015484e+02	-2.859078e+02	-4.548426e+02	-5.033228e+02	-1.933931e+02	1.325051e+02	-1.899752e+02	-2.348375e+02	-2.374667e+02	1.332847e+02	-9.870636e+01	-2.384552e+02	-4.744648e+01	-8.780231e+01
1.580000e+03	8.257926e+03	-7.901000e+02	-7.842563e+01	-1.203136e+02	-3.422764e+02	-4.690377e+02	-5.427180e+02	-2.092410e+02	1.232669e+02	-2.016840e+02	-2.421728e+02	-2.511340e+02	1.218545e+02	-1.207848e+02	-2.753635e+02	-6.690347e+01	-1.129914e+02
1.581000e+03	8.471471e+03	-8.603002e+02	-1.092534e+02	-1.484046e+02	-3.916711e+02	-4.726513e+02	-5.676002e+02	-2.208191e+02	1.004360e+02	-2.096819e+02	-2.464526e+02	-2.599750e+02	9.804368e+01	-1.422027e+02	-3.046294e+02	-8.702956e+01	-1.353456e+02
1.582000e+03	8.516559e+03	-9.148590e+02	-1.465377e+02	-1.826828e+02	-4.303491e+02	-4.654333e+02	-5.758561e+02	-2.277928e+02	6.730742e+01	-2.138386e+02	-2.476418e+02	-2.639417e+02	6.495568e+01	-1.610606e+02	-3.242595e+02	-1.060757e+02	-1.546835e+02
1.583000e+03	8.409698e+03	-9.503312e+02	-1.858408e+02	-2.194397e+02	-4.565271e+02	-4.490262e+02	-5.685699e+02	-2.300954e+02	2.863792e+01	-2.144731e+02	-2.461557e+02	-2.636967e+02	2.671431e+01	-1.760428e+02	-3.340144e+02	-1.224979e+02	-1.708838e+02
1.584000e+03	8.193754e+03	-9.669843e+02	-2.225154e+02	-2.549780e+02	-4.704794e+02	-4.264021e+02	-5.495916e+02	-2.278852e+02	-1.038137e+01	-2.121293e+02	-2.426523e+02	-2.603482e+02	-1.232546e+01	-1.865002e+02	-3.353158e+02	-1.351486e+02	-1.838176e+02
1.585000e+03	7.924229e+03	-9.680663e+02	-2.525905e+02	-2.862386e+02	-4.742346e+02	-4.010660e+02	-5.244702e+02	-2.215259e+02	-4.520111e+01	-2.073855e+02	-2.378537e+02	-2.551723e+02	-4.838265e+01	-1.924315e+02	-3.307864e+02	-1.434338e+02	-1.933661e+02
1.586000e+03	7.652934e+03	-9.582675e+02	-2.733652e+02	-3.111614e+02	-4.708456e+02	-3.761852e+02	-4.989742e+02	-2.115316e+02	-7.266420e+01	-2.006978e+02	-2.323749e+02	-2.493242e+02	-7.878258e+01	-1.943352e+02	-3.234831e+02	-1.473489e+02	-1.994328e+02
1.587000e+03	7.414382e+03	-9.417416e+02	-2.834847e+02	-3.285914e+02	-4.633716e+02	-3.538007e+02	-4.775617e+02	-1.984320e+02	-9.122517e+01	-1.922569e+02	-2.265198e+02	-2.435337e+02	-1.020666e+02	-1.929410e+02	-3.160137e+02	-1.473450e+02	-2.018965e+02
1.588000e+03	7.219209e+03	-9.203608e+02	-2.825741e+02	-3.378145e+02	-4.538794e+02	-3.342930e+02	-4.622234e+02	-1.825952e+02	-1.006902e+02	-1.818818e+02	-2.200670e+02	-2.378299e+02	-1.177423e+02	-1.888925e+02	-3.098077e+02	-1.440597e+02	-2.005351e+02
1.589000e+03	7.056378e+03	-8.929394e+02	-2.707501e+02	-3.380442e+02	-4.428351e+02	-3.162733e+02	-4.520549e+02	-1.641157e+02	-1.017284e+02	-1.690197e+02	-2.121429e+02	-2.314044e+02	-1.258965e+02	-1.824992e+02	-3.047965e+02	-1.380272e+02	-1.950161e+02
1.590000e+03	6.902644e+03	-8.558349e+02	-2.483596e+02	-3.282233e+02	-4.291440e+02	-2.969969e+02	-4.437106e+02	-1.428684e+02	-9.543976e+01	-1.529178e+02	-2.013068e+02	-2.227278e+02	-1.269126e+02	-1.736705e+02	-2.996266e+02	-1.295066e+02	-1.850295e+02
1.591000e+03	6.735308e+03	-8.047222e+02	-2.160890e+02	-3.073027e+02	-4.108324e+02	-2.732190e+02	-4.325912e+02	-1.187323e+02	-8.313542e+01	-1.329511e+02	-1.858932e+02	-2.099433e+02	-1.214065e+02	-1.620708e+02	-2.923185e+02	-1.185037e+02	-1.705365e+02
1.592000e+03	6.543331e+03	-7.367478e+02	-1.752967e+02	-2.748412e+02	-3.860679e+02	-2.422207e+02	-4.143413e+02	-9.187090e+01	-6.630534e+01	-1.089882e+02	-1.645165e+02	-1.914144e+02	-1.103225e+02	-1.474162e+02	-2.811043e+02	-1.049541e+02	-1.519998e+02
1.593000e+03	6.332817e+03	-6.520571e+02	-1.282579e+02	-2.315576e+02	-3.540481e+02	-2.026369e+02	-3.861162e+02	-6.290443e+01	-4.662595e+01	-8.162785e+01	-1.365366e+02	-1.662046e+02	-9.501913e+01	-1.297505e+02	-2.651030e+02	-8.893650e+01	-1.304333e+02
1.594000e+03	6.125228e+03	-5.540054e+02	-7.806689e+01	-1.794854e+02	-3.153630e+02	-1.547983e+02	-3.471918e+02	-3.286998e+01	-2.587172e+01	-5.219002e+01	-1.022922e+02	-1.342902e+02	-7.719124e+01	-1.095446e+02	-2.445800e+02	-7.077543e+01	-1.071916e+02
1.595000e+03	5.949553e+03	-4.480419e+02	-2.816832e+01	-1.216245e+02	-2.717089e+02	-1.005340e+02	-2.988071e+02	-2.996981e+00	-5.696715e+00	-2.246551e+01	-6.303006e+01	-9.645547e+01	-5.859180e+01	-8.755950e+01	-2.207356e+02	-5.096674e+01	-8.357433e+01
1.596000e+03	5.831953e+03	-3.399278e+02	1.828092e+01	-6.128328e+01	-2.251578e+02	-4.263987e+01	-2.434696e+02	2.556148e+01	1.263561e+01	5.652022e+00	-2.062905e+01	-5.400492e+01	-4.065052e+01	-6.455321e+01	-1.951753e+02	-2.997681e+01	-6.043796e+01
1.597000e+03	5.787229e+03	-2.342225e+02	5.893259e+01	-1.467886e+00	-1.773851e+02	1.566198e+01	-1.841638e+02	5.188287e+01	2.845041e+01	3.048903e+01	2.269573e+01	-8.518973e+00	-2.415858e+01	-4.099961e+01	-1.693349e+02	-8.045026e+00	-3.802178e+01
1.598000e+03	5.815509e+03	-1.337405e+02	9.245092e+01	5.538696e+01	-1.292347e+02	7.101988e+01	-1.238548e+02	7.523916e+01	4.169922e+01	5.075803e+01	6.455431e+01	3.817537e+01	-9.160952e+00	-1.697325e+01	-1.441153e+02	1.488576e+01	-1.608918e+01
1.599000e+03	5.905228e+03	-4.010037e+01	1.183756e+02	1.072779e+02	-8.079967e+01	1.199737e+02	-6.544143e+01	9.491776e+01	5.282606e+01	6.555463e+01	1.023908e+02	8.382229e+01	4.894649e+00	7.747154e+00	-1.198593e+02	3.906558e+01	5.665382e+00
1.600000e+03	6.040762e+03	4.507379e+01	1.367584e+02	1.522445e+02	-3.193985e+01	1.588768e+02	-1.202110e+01	1.100258e+02	6.250981e+01	7.425179e+01	1.334512e+02	1.255164e+02	1.880153e+01	3.342762e+01	-9.664520e+01	6.471269e+01	2.711184e+01
1.601000e+03	6.211198e+03	1.189904e+02	1.477187e+02	1.879862e+02	1.701587e+01	1.839627e+02	3.283843e+01	1.193970e+02	7.134494e+01	7.637429e+01	1.548581e+02	1.596717e+02	3.313640e+01	6.011720e+01	-7.474910e+01	9.177423e+01	4.727816e+01
1.602000e+03	6.416357e+03	1.771198e+02	1.510128e+02	2.116737e+02	6.467408e+01	1.916874e+02	6.510292e+01	1.216456e+02	7.950855e+01	7.150170e+01	1.638659e+02	1.823156e+02	4.781512e+01	8.749151e+01	-5.508183e+01	1.197673e+02	6.418620e+01
1.603000e+03	6.667466e+03	2.134057e+02	1.456741e+02	2.200131e+02	1.083088e+02	1.792899e+02	8.066073e+01	1.153303e+02	8.645954e+01	5.920862e+01	1.582531e+02	1.896799e+02	6.176511e+01	1.148388e+02	-3.941958e+01	1.477416e+02	7.498707e+01
1.604000e+03	6.982115e+03	2.211319e+02	1.298076e+02	2.095531e+02	1.440360e+02	1.453770e+02	7.601847e+01	9.916984e+01	9.074971e+01	3.904835e+01	1.367414e+02	1.789268e+02	7.281349e+01	1.411569e+02	-3.030916e+01	1.743596e+02	7.637961e+01
1.605000e+03	7.375404e+03	1.942216e+02	1.007092e+02	1.772494e+02	1.674609e+02	9.035161e+01	4.912308e+01	7.228515e+01	9.007531e+01	1.062082e+01	9.935418e+01	1.488367e+02	7.789273e+01	1.653183e+02	-3.060675e+01	1.980822e+02	6.525379e+01
1.606000e+03	7.850585e+03	1.288388e+02	5.551781e+01	1.213506e+02	1.747614e+02	1.663305e+01	1.354955e-01	3.450296e+01	8.170477e+01	-2.620306e+01	4.770258e+01	1.003465e+02	7.364096e+01	1.863025e+02	-4.269978e+01	2.174746e+02	3.947789e+01
1.607000e+03	8.392673e+03	2.524525e+01	-7.508213e+00	4.261418e+01	1.640804e+02	-7.126848e+01	-6.797266e+01	-1.324001e+01	6.332968e+01	-7.085629e+01	-1.478079e+01	3.689219e+01	5.738380e+01	2.035272e+02	-6.755984e+01	2.316509e+02	-1.282764e+00
1.608000e+03	8.967428e+03	-1.102773e+02	-8.729842e+01	-5.437423e+01	1.369409e+02	-1.667669e+02	-1.491238e+02	-6.843709e+01	3.419830e+01	-1.215163e+02	-8.271060e+01	-3.550389e+01	2.832243e+01	2.172753e+02	-1.038728e+02	2.408201e+02	-5.488365e+01
1.609000e+03	9.526308e+03	-2.640050e+02	-1.784437e+02	-1.603144e+02	9.921482e+01	-2.613909e+02	-2.343160e+02	-1.266854e+02	-3.829548e+00	-1.746336e+02	-1.488973e+02	-1.085475e+02	-1.143179e+01	2.290989e+02	-1.475586e+02	2.467741e+02	-1.163882e+02
1.610000e+03	1.001602e+04	-4.147949e+02	-2.706578e+02	-2.614500e+02	6.107458e+01	-3.453853e+02	-3.124876e+02	-1.817909e+02	-4.579975e+01	-2.248758e+02	-2.050205e+02	-1.725744e+02	-5.644251e+01	2.419646e+02	-1.919783e+02	2.530468e+02	-1.783782e+02
1.611000e+03	1.038981e+04	-5.364808e+02	-3.499250e+02	-3.414962e+02	3.549863e+01	-4.089523e+02	-3.721698e+02	-2.265587e+02	-8.417372e+01	-2.657658e+02	-2.429612e+02	-2.181204e+02	-9.854399e+01	2.598837e+02	-2.289836e+02	2.644686e+02	-2.320509e+02
1.612000e+03	1.061717e+04	-6.029021e+02	-4.014683e+02	-3.851576e+02	3.535044e+01	-4.441057e+02	-4.037528e+02	-2.542784e+02	-1.104354e+02	-2.910431e+02	-2.566241e+02	-2.379570e+02	-1.285364e+02	2.869243e+02	-2.506905e+02	2.860198e+02	-2.690306e+02
1.613000e+03	1.068899e+04	-5.946368e+02	-4.138393e+02	-3.823560e+02	6.968845e+01	-4.467085e+02	-4.018317e+02	-2.605487e+02	-1.174324e+02	-2.964122e+02	-2.437326e+02	-2.290534e+02	-1.386196e+02	3.257916e+02	-2.515356e+02	3.211958e+02	-2.834908e+02
1.614000e+03	1.061693e+04	-5.053393e+02	-3.827223e+02	-3.316913e+02	1.405007e+02	-4.179474e+02	-3.668504e+02	-2.447849e+02	-1.016794e+02	-2.810434e+02	-2.068841e+02	-1.937406e+02	-1.247965e+02	3.764426e+02	-2.299462e+02	3.704129e+02	-2.739099e+02
1.615000e+03	1.042760e+04	-3.451677e+02	-3.128943e+02	-2.416672e+02	2.411580e+02	-3.645098e+02	-3.053338e+02	-2.107347e+02	-6.473683e+01	-2.481538e+02	-1.533034e+02	-1.394932e+02	-8.834738e+01	4.353093e+02	-1.889772e+02	4.300970e+02	-2.437508e+02
1.616000e+03	1.015362e+04	-1.395420e+02	-2.173901e+02	-1.289526e+02	3.573822e+02	-2.971540e+02	-2.284277e+02	-1.656597e+02	-1.306707e+01	-2.043164e+02	-9.318827e+01	-7.720722e+01	-3.574382e+01	4.955471e+02	-1.355887e+02	4.929308e+02	-2.006571e+02
1.617000e+03	9.824764e+03	7.678993e+01	-1.140532e+02	-1.412003e+01	4.705942e+02	-2.280268e+02	-1.491065e+02	-1.183994e+02	4.363367e+01	-1.576788e+02	-3.713265e+01	-1.845079e+01	2.303511e+01	5.483444e+02	-7.875652e+01	5.493105e+02	-1.543263e+02
1.618000e+03	9.461797e+03	2.684841e+02	-2.076558e+01	8.364216e+01	5.625516e+02	-1.676480e+02	-7.895904e+01	-7.703258e+01	9.501360e+01	-1.157712e+02	6.481492e+00	2.739087e+01	7.718331e+01	5.849201e+02	-2.707952e+01	5.895923e+02	-1.137804e+02
1.619000e+03	9.074694e+03	4.081073e+02	4.885981e+01	1.509710e+02	6.196947e+02	-1.226370e+02	-2.563464e+01	-4.701600e+01	1.326144e+02	-8.374787e+01	3.321569e+01	5.511116e+01	1.177767e+02	5.985696e+02	1.325771e+01	6.064009e+02	-8.502651e+01
1.620000e+03	8.665023e+03	4.816158e+02	8.789323e+01	1.825149e+02	6.358104e+02	-9.491104e+01	8.253949e+00	-3.041587e+01	1.515622e+02	-6.366441e+01	4.291650e+01	6.422207e+01	1.396176e+02	5.861297e+02	3.950405e+01	5.962737e+02	-6.992083e+01
1.621000e+03	8.231079e+03	4.894036e+02	9.614837e+01	1.804977e+02	6.123810e+02	-8.242465e+01	2.459209e+01	-2.631766e+01	1.510207e+02	-5.487031e+01	3.874798e+01	5.804826e+01	1.417664e+02	5.484854e+02	5.214979e+01	5.602021e+02	-6.650981e+01
1.622000e+03	7.773477e+03	4.433274e+02	7.843832e+01	1.523425e+02	5.569052e+02	-8.089922e+01	2.804090e+01	-3.199922e+01	1.335464e+02	-5.510850e+01	2.549094e+01	4.192176e+01	1.268657e+02	4.900915e+02	5.383455e+01	5.030449e+02	-7.050493e+01
1.623000e+03	7.299229e+03	3.614732e+02	4.212952e+01	1.075987e+02	4.801347e+02	-8.570967e+01	2.394377e+01	-4.423100e+01	1.038257e+02	-6.169870e+01	7.854144e+00	2.125512e+01	9.975661e+01	4.177963e+02	4.795697e+01	4.321549e+02	-7.715564e+01
1.624000e+03	6.823321e+03	2.628069e+02	-4.979277e+00	5.533471e+01	3.933208e+02	-9.323515e+01	1.664258e+01	-6.018727e+01	6.732969e+01	-7.231308e+01	-1.064183e+01	1.434681e-01	6.598683e+01	3.394029e+02	3.756604e+01	3.557344e+02	-8.276956e+01
1.625000e+03	6.368050e+03	1.633321e+02	-5.591977e+01	2.627380e+00	3.062785e+02	-1.013908e+02	8.647101e+00	-7.777510e+01	2.926187e+01	-8.518685e+01	-2.802769e+01	-1.921170e+01	3.066394e+01	2.623885e+02	2.485161e+01	2.814084e+02	-8.543095e+01
1.626000e+03	5.961256e+03	7.439846e+01	-1.049666e+02	-4.582012e+01	2.265661e+02	-1.094715e+02	6.739975e-01	-9.550034e+01	-6.051974e+00	-9.892046e+01	-4.366323e+01	-3.633848e+01	-2.149207e+00	1.930546e+02	1.122485e+01	2.153243e+02	-8.488378e+01
1.627000e+03	5.634508e+03	2.892290e+00	-1.475258e+02	-8.729639e+01	1.596134e+02	-1.176558e+02	-7.740955e+00	-1.121413e+02	-3.536451e+01	-1.121672e+02	-5.775769e+01	-5.189797e+01	-2.953217e+01	1.361805e+02	-2.253061e+00	1.618505e+02	-8.186834e+01
1.628000e+03	5.421548e+03	-4.750455e+01	-1.798728e+02	-1.204022e+02	1.093469e+02	-1.264970e+02	-1.745838e+01	-1.264779e+02	-5.643137e+01	-1.234470e+02	-7.091520e+01	-6.699529e+01	-4.948172e+01	9.506857e+01	-1.440952e+01	1.237412e+02	-7.732408e+01
1.629000e+03	5.356226e+03	-7.491348e+01	-1.990116e+02	-1.444472e+02	7.880290e+01	-1.365700e+02	-2.910549e+01	-1.372088e+02	-6.783192e+01	-1.311844e+02	-8.383639e+01	-8.263477e+01	-6.060693e+01	7.175940e+01	-2.372127e+01	1.025095e+02	-7.180757e+01
1.630000e+03	5.468725e+03	-7.842803e+01	-2.027934e+02	-1.591357e+02	7.033730e+01	-1.482911e+02	-4.276778e+01	-1.430786e+02	-6.885358e+01	-1.339433e+02	-9.716774e+01	-9.941427e+01	-6.196573e+01	6.718931e+01	-2.842149e+01	9.874460e+01	-6.530472e+01
1.631000e+03	5.779386e+03	-5.816037e+01	-1.903238e+02	-1.646020e+02	8.528778e+01	-1.618565e+02	-5.801053e+01	-1.431698e+02	-5.955273e+01	-1.307727e+02	-1.114321e+02	-1.174447e+02	-5.316926e+01	8.116256e+01	-2.692840e+01	1.122026e+02	-5.742821e+01
1.632000e+03	6.290954e+03	-1.601639e+01	-1.625650e+02	-1.617197e+02	1.232412e+02	-1.772613e+02	-7.412885e+01	-1.372745e+02	-4.099683e+01	-1.215677e+02	-1.269888e+02	-1.364293e+02	-3.473183e+01	1.121726e+02	-1.843704e+01	1.416655e+02	-4.784646e+01
1.633000e+03	6.981731e+03	4.331424e+01	-1.229098e+02	-1.525026e+02	1.812996e+02	-1.943935e+02	-9.047533e+01	-1.262343e+02	-1.555891e+01	-1.073482e+02	-1.440112e+02	-1.558301e+02	-8.493399e+00	1.572452e+02	-3.432053e+00	1.847201e+02	-3.672496e+01
1.634000e+03	7.802973e+03	1.117997e+02	-7.740927e+01	-1.403544e+02	2.538015e+02	-2.132003e+02	-1.067207e+02	-1.121140e+02	1.295332e+01	-9.035812e+01	-1.624955e+02	-1.750639e+02	2.213861e+01	2.120095e+02	1.611936e+01	2.376722e+02	-2.498337e+01
1.635000e+03	8.683124e+03	1.784225e+02	-3.437626e+01	-1.299571e+02	3.327914e+02	-2.338871e+02	-1.229515e+02	-9.809590e+01	3.953423e+01	-7.390510e+01	-1.823014e+02	-1.936820e+02	5.234206e+01	2.711068e+02	3.702846e+01	2.957554e+02	-1.426790e+01
1.636000e+03	9.539152e+03	2.305527e+02	-3.266671e+00	-1.267032e+02	4.091985e+02	-2.570491e+02	-1.395774e+02	-8.804957e+01	5.865184e+01	-6.191345e+01	-2.031999e+02	-2.114897e+02	7.649553e+01	3.288676e+02	5.555645e+01	3.536372e+02	-6.660842e+00
1.637000e+03	1.029232e+04	2.560387e+02	6.996977e+00	-1.357328e+02	4.743700e+02	-2.836150e+02	-1.570870e+02	-8.583098e+01	6.524233e+01	-5.824210e+01	-2.248793e+02	-2.285607e+02	8.914710e+01	3.800517e+02	6.828447e+01	4.060840e+02	-4.241393e+00
1.638000e+03	1.088369e+04	2.455016e+02	-1.011057e+01	-1.607642e+02	5.214897e+02	-3.145201e+02	-1.757290e+02	-9.445542e+01	5.578120e+01	-6.589173e+01	-2.468673e+02	-2.451034e+02	8.610605e+01	4.204392e+02	7.289854e+01	4.485931e+02	-8.634341e+00
1.639000e+03	1.128453e+04	1.943373e+02	-5.710778e+01	-2.029722e+02	5.465363e+02	-3.501391e+02	-1.952074e+02	-1.153322e+02	2.915513e+01	-8.626711e+01	-2.683690e+02	-2.611842e+02	6.540235e+01	4.471841e+02	6.866424e+01	4.778777e+02	-2.064213e+01
1.640000e+03	1.149916e+04	1.040899e+02	-1.315324e+02	-2.601865e+02	5.487103e+02	-3.896566e+02	-2.144816e+02	-1.477465e+02	-1.287547e+01	-1.186658e+02	-2.880870e+02	-2.763809e+02	2.790887e+01	4.590054e+02	5.650925e+01	4.922102e+02	-3.999700e+01
1.641000e+03	1.156052e+04	-1.702090e+01	-2.258600e+02	-3.266695e+02	5.304655e+02	-4.306669e+02	-2.317524e+02	-1.887393e+02	-6.573085e+01	-1.601424e+02	-3.041497e+02	-2.895224e+02	-2.250881e+01	4.563606e+02	3.877237e+01	4.917054e+02	-6.524164e+01
1.642000e+03	1.152161e+04	-1.546117e+02	-3.284313e+02	-3.936836e+02	4.973082e+02	-4.692955e+02	-2.447027e+02	-2.334754e+02	-1.225996e+02	-2.058483e+02	-3.142819e+02	-2.986962e+02	-7.938869e+01	4.416720e+02	1.874442e+01	4.785786e+02	-9.376234e+01
1.643000e+03	1.144598e+04	-2.898541e+02	-4.253425e+02	-4.509176e+02	4.573818e+02	-5.009788e+02	-2.510037e+02	-2.760960e+02	-1.754997e+02	-2.498612e+02	-3.162837e+02	-3.016369e+02	-1.346196e+02	4.194988e+02	1.133315e-01	4.572852e+02	-1.220262e+02
1.644000e+03	1.139944e+04	-4.023923e+02	-5.030306e+02	-4.885968e+02	4.206865e+02	-5.217644e+02	-2.490017e+02	-3.109197e+02	-2.166670e+02	-2.863823e+02	-3.087443e+02	-2.964518e+02	-1.798380e+02	3.963986e+02	-1.362087e+01	4.343255e+02	-1.460659e+02
1.645000e+03	1.144233e+04	-4.740808e+02	-5.510322e+02	-4.998087e+02	3.977424e+02	-5.296924e+02	-2.383837e+02	-3.337078e+02	-2.400207e+02	-3.110283e+02	-2.917640e+02	-2.824533e+02	-2.080310e+02	3.802058e+02	-1.972166e+01	4.174831e+02	-1.621862e+02
1.646000e+03	1.162064e+04	-4.927490e+02	-5.642063e+02	-4.823631e+02	3.976580e+02	-5.256726e+02	-2.205565e+02	-3.426181e+02	-2.423780e+02	-3.218414e+02	-2.673671e+02	-2.607500e+02	-2.149841e+02	3.786176e+02	-1.672775e+01	4.144057e+02	-1.677647e+02
1.647000e+03	1.195491e+04	-4.549820e+02	-5.437450e+02	-4.395325e+02	4.258755e+02	-5.133735e+02	-1.985192e+02	-3.385130e+02	-2.240902e+02	-3.196624e+02	-2.393352e+02	-2.342841e+02	-2.001877e+02	3.972731e+02	-4.810692e+00	4.307073e+02	-1.619289e+02
1.648000e+03	1.242877e+04	-3.670613e+02	-4.966038e+02	-3.793227e+02	4.821846e+02	-4.980168e+02	-1.761819e+02	-3.244807e+02	-1.889038e+02	-3.077007e+02	-2.123809e+02	-2.071933e+02	-1.669349e+02	4.378265e+02	1.413189e+01	4.680752e+02	-1.458816e+02
1.649000e+03	1.298225e+04	-2.436983e+02	-4.334902e+02	-3.124200e+02	5.597739e+02	-4.844675e+02	-1.573101e+02	-3.047237e+02	-1.430627e+02	-2.904206e+02	-1.908588e+02	-1.836577e+02	-1.215566e+02	4.967086e+02	3.673542e+01	5.230623e+02	-1.227173e+02
1.650000e+03	1.351617e+04	-1.048408e+02	-3.660463e+02	-2.494384e+02	6.459585e+02	-4.753816e+02	-1.444512e+02	-2.832233e+02	-9.389656e+01	-2.721353e+02	-1.774452e+02	-1.666290e+02	-7.199009e+01	5.652078e+02	5.879496e+01	5.871884e+02	-9.672727e+01
1.651000e+03	1.391084e+04	2.860947e+01	-3.041206e+02	-1.983505e+02	7.247357e+02	-4.702119e+02	-1.382331e+02	-2.626757e+02	-4.828275e+01	-2.558168e+02	-1.722929e+02	-1.569263e+02	-2.605473e+01	6.311215e+02	7.616323e+01	6.485974e+02	-7.235770e+01
1.652000e+03	1.405619e+04	1.390282e+02	-2.539377e+02	-1.629084e+02	7.806047e+02	-4.655246e+02	-1.372962e+02	-2.440686e+02	-1.138741e+01	-2.425246e+02	-1.730234e+02	-1.530638e+02	1.011891e+01	6.816382e+02	8.570652e+01	6.949215e+02	-5.312664e+01
1.653000e+03	1.388371e+04	2.151455e+02	-2.175882e+02	-1.424944e+02	8.024612e+02	-4.564992e+02	-1.388844e+02	-2.269717e+02	1.402457e+01	-2.315851e+02	-1.756066e+02	-1.519021e+02	3.311843e+01	7.065548e+02	8.603366e+01	7.164472e+02	-4.084190e+01
1.654000e+03	1.338806e+04	2.532349e+02	-1.937600e+02	-1.333233e+02	7.862066e+02	-4.389707e+02	-1.398901e+02	-2.103148e+02	2.761056e+01	-2.213437e+02	-1.758264e+02	-1.498983e+02	4.251271e+01	7.007233e+02	7.774189e+01	7.084789e+02	-3.537517e+01
1.655000e+03	1.262952e+04	2.562771e+02	-1.792318e+02	-1.304649e+02	7.351650e+02	-4.111760e+02	-1.379969e+02	-1.932519e+02	3.090497e+01	-2.101134e+02	-1.708029e+02	-1.444981e+02	4.035143e+01	6.649116e+02	6.307144e+01	6.721010e+02	-3.505064e+01
1.656000e+03	1.171655e+04	2.316028e+02	-1.704901e+02	-1.299136e+02	6.583033e+02	-3.745611e+02	-1.325519e+02	-1.757383e+02	2.646052e+01	-1.969330e+02	-1.600261e+02	-1.351661e+02	3.012948e+01	6.049278e+02	4.508231e+01	6.132216e+02	-3.747426e+01
1.657000e+03	1.077586e+04	1.879562e+02	-1.649309e+02	-1.299890e+02	5.671415e+02	-3.334572e+02	-1.249032e+02	-1.586336e+02	1.697942e+01	-1.819000e+02	-1.455619e+02	-1.236865e+02	1.559257e+01	5.295588e+02	2.666017e+01	5.404760e+02	-4.046668e+01
1.658000e+03	9.921873e+03	1.329896e+02	-1.613750e+02	-1.316501e+02	4.726473e+02	-2.938832e+02	-1.181106e+02	-1.433813e+02	4.682942e+00	-1.660556e+02	-1.314011e+02	-1.136425e+02	-2.283318e-01	4.482333e+02	9.723005e+00	4.629148e+02	-4.274516e+01
[truncated: 2,342 more rows]
